# Supplementary material for: Potential role of KRAB-ZFP binding and transcriptional states on DNA methylation of retroelements in human male germ cells
Source: eLife. 2022 Mar 22;11:e76822. doi: 10.7554/eLife.76822 (PMC8967385; doi:10.7554/eLife.76822)
Supplement: Figure 1—source data 1. [file elife-76822-fig1-data1.xlsx]

## Sheet: Sheet1
Figure1-source data 1: Raw. Scatter plots showing average DNA methylation level of each retroelement type between somatic cells and male hPGCs at 19 weeks of gestation.
				E11 soma	E19
L1PA4	LINE	L1	L1PA4	0.883294	0.542278
L1PA3	LINE	L1	L1PA3	0.870477	0.505467
L1PA5	LINE	L1	L1PA5	0.892415	0.513901
L1PA6	LINE	L1		0.881067	0.383385
L1PA2	LINE	L1		0.849016	0.350428
L1PA7	LINE	L1		0.880512	0.302821
L1PA8	LINE	L1		0.884461	0.299816
L1HS	LINE	L1		0.873552	0.300696
LTR12C	LTR	ERV1		0.923881	0.397857
MER52A	LTR	ERV1		0.914633	0.270665
LTR12D	LTR	ERV1		0.892808	0.396677
LTR17	LTR	ERV1		0.929949	0.186009
LTR12	LTR	ERV1	LTR12	0.932238	0.468264
MER52D	LTR	ERV1		0.896708	0.238792
HERVL-int	LTR	ERVL		0.890287	0.249547
LTR13	LTR	ERVK		0.706983	0.246189
LTR12E	LTR	ERV1		#N/A	0.340335
LTR1	LTR	ERV1		0.87097	0.0563189
LTR1D	LTR	ERV1		0.879292	0.150891
MLT1C	LTR	ERVL-MaLR		0.814812	0.0729049
MER52C	LTR	ERV1		0.846242	0.103997
MLT1D	LTR	ERVL-MaLR		0.779109	0.0549654
SVA_D	Other	Other		0.937173	0.19472
SVA_B	Other	Other		0.944909	0.267352
SVA_C	Other	Other		0.942791	0.266123
SVA_A	Other	Other	SVA_A	0.938282	0.554438
SVA_F	Other	Other		0.937926	0.20723
AluY	SINE	Alu		0.931062	0.10996
AluYa5	SINE	Alu		0.941901	0.209946
AluSg	SINE	Alu		0.903145	0.098609
AluSx1	SINE	Alu		0.880856	0.0647443
AluSx	SINE	Alu		0.888377	0.0740961
AluSc	SINE	Alu		0.914608	0.0993188
AluSp	SINE	Alu		0.909681	0.0919269
AluYb8	SINE	Alu		0.945861	0.208707
AluSz	SINE	Alu		0.875299	0.0686666
AluYk4	SINE	Alu		0.940777	0.144056
AluSc8	SINE	Alu		0.915242	0.0790441
AluSq2	SINE	Alu		0.894705	0.080041
AluSx3	SINE	Alu		0.914811	0.0838265
AluYc	SINE	Alu		0.936446	0.107032
AluYf4	SINE	Alu		0.939751	0.120076
AluSz6	SINE	Alu		0.896603	0.0919752
AluSq	SINE	Alu		0.896948	0.0792998
AluJb	SINE	Alu		0.782229	0.079326

## Sheet: Sheet2
Figure1-source data 2: Raw. Violin plots showing DNA methylation level of each retroelement type in hPGCs at 19 weeks of gestation.
group	PGC_19W_embryo1_M			group	PGC_19W_embryo1_M			group	PGC_19W_embryo1_M
SVA_D:Other:Other:-	0.245238			L1PA3:LINE:L1:+	0.214202			LTR12C:LTR:ERV1:-	0.134815
SVA_D:Other:Other:-	0.105936			L1PA6:LINE:L1:-	0.206061			LTR12C:LTR:ERV1:-	0.0128205
SVA_D:Other:Other:-	0.0551511			L1PA2:LINE:L1:-	0.255058			LTR12C:LTR:ERV1:-	0.12441
SVA_D:Other:Other:-	0.607465			L1PA4:LINE:L1:-	0.277302			LTR12C:LTR:ERV1:+	0.626446
SVA_D:Other:Other:+	0.117399			L1PA4:LINE:L1:+	0.403016			LTR12C:LTR:ERV1:+	0.624154
SVA_C:Other:Other:-	0.194762			L1PA3:LINE:L1:+	0.583564			LTR12E:LTR:ERV1:-	0.0285714
SVA_C:Other:Other:-	0.0166667			L1PA7:LINE:L1:-	0.455311			LTR12:LTR:ERV1:+	0.482051
SVA_D:Other:Other:-	0.166369			L1PA3:LINE:L1:+	0.550714			LTR12C:LTR:ERV1:+	0.120086
SVA_D:Other:Other:+	0.526554			L1PA2:LINE:L1:-	0.486667			LTR12C:LTR:ERV1:-	0.42379
SVA_F:Other:Other:+	0.0851989			L1PA6:LINE:L1:-	0.103896			LTR12C:LTR:ERV1:-	0.789423
SVA_D:Other:Other:+	0.0886393			L1PA4:LINE:L1:-	0.605159			LTR12C:LTR:ERV1:-	0.264739
SVA_D:Other:Other:+	0.110749			L1PA7:LINE:L1:+	0.209341			LTR12E:LTR:ERV1:+	0.752041
SVA_D:Other:Other:+	0.0906797			L1PA7:LINE:L1:-	0.555278			LTR12C:LTR:ERV1:+	0.314246
SVA_D:Other:Other:+	0.365556			L1PA3:LINE:L1:-	0.6329			LTR12C:LTR:ERV1:-	0.239337
SVA_D:Other:Other:+	0.074388			L1PA2:LINE:L1:+	0.126042			LTR12C:LTR:ERV1:+	0.31759
SVA_D:Other:Other:+	0.0285714			L1PA5:LINE:L1:-	0.546577			LTR12C:LTR:ERV1:+	0.0927212
SVA_D:Other:Other:-	0.0142857			L1PA4:LINE:L1:+	0.608678			LTR12C:LTR:ERV1:+	0.695014
SVA_D:Other:Other:-	0.0352608			L1PA4:LINE:L1:+	0.606667			LTR12C:LTR:ERV1:-	0.114183
SVA_D:Other:Other:+	0.117512			L1PA3:LINE:L1:+	0.318707			LTR12C:LTR:ERV1:-	0.595155
SVA_B:Other:Other:-	0.0724952			L1PA3:LINE:L1:+	0.21708			LTR12C:LTR:ERV1:-	0.829209
SVA_B:Other:Other:-	0.222789			L1PA6:LINE:L1:-	0.1371			LTR12C:LTR:ERV1:+	0.748529
SVA_B:Other:Other:+	0.526683			L1PA4:LINE:L1:+	0.544709			LTR12:LTR:ERV1:+	0.550032
SVA_D:Other:Other:+	0.158138			L1PA4:LINE:L1:+	0.519862			LTR12C:LTR:ERV1:-	0.764196
SVA_D:Other:Other:+	0.445392			L1PA5:LINE:L1:+	0.700306			LTR12C:LTR:ERV1:-	0.803036
SVA_F:Other:Other:-	0.0466667			L1PA5:LINE:L1:-	0.269286			LTR12C:LTR:ERV1:-	0.741215
SVA_B:Other:Other:+	0.0638695			L1PA5:LINE:L1:+	0.552202			LTR12C:LTR:ERV1:+	0.389218
SVA_B:Other:Other:+	0.147707			L1PA5:LINE:L1:+	0.616103			LTR12C:LTR:ERV1:+	0.500335
SVA_D:Other:Other:-	0.0701754			L1PA3:LINE:L1:+	0.572662			LTR12C:LTR:ERV1:-	0.0823529
SVA_F:Other:Other:+	0.206287			L1PA4:LINE:L1:+	0.737626			LTR12C:LTR:ERV1:+	0.28698
SVA_D:Other:Other:+	0.0273148			L1PA3:LINE:L1:-	0.795005			LTR12C:LTR:ERV1:+	0.737721
SVA_D:Other:Other:+	0.110012			L1PA6:LINE:L1:-	0.548413			LTR12C:LTR:ERV1:+	0.427228
SVA_B:Other:Other:-	0.026817			L1PA6:LINE:L1:-	0.592855			LTR12C:LTR:ERV1:+	0.00694444
SVA_E:Other:Other:+	0.0190972			L1PA4:LINE:L1:+	0.595663			LTR12C:LTR:ERV1:-	0.609726
SVA_D:Other:Other:+	0.196296			L1PA2:LINE:L1:-	0.58208			LTR12C:LTR:ERV1:-	0.431951
SVA_B:Other:Other:+	0.196898			L1PA5:LINE:L1:+	0.572222			LTR12E:LTR:ERV1:+	0.696771
SVA_D:Other:Other:+	0.213955			L1PA3:LINE:L1:+	0.618214			LTR12C:LTR:ERV1:-	0.44783
SVA_D:Other:Other:-	0.133435			L1PA5:LINE:L1:-	0.712328			LTR12C:LTR:ERV1:-	0.68206
SVA_F:Other:Other:+	0.176576			L1PA5:LINE:L1:-	0.272381			LTR12C:LTR:ERV1:-	0.234977
SVA_D:Other:Other:-	0.0105909			L1PA3:LINE:L1:-	0.837853			LTR12C:LTR:ERV1:-	0.0849327
SVA_D:Other:Other:-	0.145342			L1PA5:LINE:L1:+	0.770833			LTR12C:LTR:ERV1:+	0.153188
SVA_C:Other:Other:-	0.0651042			L1PA4:LINE:L1:-	0.389624			LTR12C:LTR:ERV1:-	0.591884
SVA_B:Other:Other:-	0.54011			L1PA2:LINE:L1:-	0.123077			LTR12D:LTR:ERV1:-	0.482045
SVA_B:Other:Other:-	0.0407867			L1PA5:LINE:L1:+	0.64827			LTR12C:LTR:ERV1:-	0.844144
SVA_D:Other:Other:-	0.154688			L1PA3:LINE:L1:+	0.609944			LTR12C:LTR:ERV1:-	0.165873
SVA_D:Other:Other:-	0.38445			L1PA3:LINE:L1:+	0.592157			LTR12C:LTR:ERV1:-	0.310065
SVA_D:Other:Other:-	0.453671			L1PA4:LINE:L1:+	0.558403			LTR12C:LTR:ERV1:-	0.811109
SVA_C:Other:Other:-	0.349563			L1PA2:LINE:L1:-	0.146296			LTR12C:LTR:ERV1:-	0.148136
SVA_B:Other:Other:+	0.767458			L1PA5:LINE:L1:+	0.275224			LTR12C:LTR:ERV1:+	0.119429
SVA_D:Other:Other:+	0.067619			L1PA4:LINE:L1:-	0.348761			LTR12C:LTR:ERV1:+	0.0435626
SVA_C:Other:Other:-	0.251461			L1PA3:LINE:L1:+	0.574758			LTR12C:LTR:ERV1:-	0.481772
SVA_D:Other:Other:-	0.182083			L1PA3:LINE:L1:-	0.482773			LTR12C:LTR:ERV1:-	0.23837
SVA_F:Other:Other:+	0.32452			L1PA3:LINE:L1:-	0.212626			LTR12C:LTR:ERV1:-	0.789079
SVA_B:Other:Other:+	0.0436254			L1PA7:LINE:L1:+	0.23873			LTR12C:LTR:ERV1:-	0.25
SVA_B:Other:Other:+	0.0902069			L1PA4:LINE:L1:-	0.654286			LTR12C:LTR:ERV1:+	0.1743
SVA_D:Other:Other:-	0.246984			L1PA4:LINE:L1:+	0.635192			LTR12C:LTR:ERV1:+	0.465893
SVA_A:Other:Other:+	0.0744444			L1PA4:LINE:L1:-	0.53343			LTR12C:LTR:ERV1:-	0.575345
SVA_C:Other:Other:-	0.157482			L1PA6:LINE:L1:-	0.272527			LTR12C:LTR:ERV1:-	0.103788
SVA_A:Other:Other:+	0.781035			L1PA2:LINE:L1:+	0.550808			LTR12C:LTR:ERV1:+	0.157071
SVA_C:Other:Other:-	0.490463			L1PA5:LINE:L1:-	0.594303			LTR12C:LTR:ERV1:+	0.154715
SVA_D:Other:Other:+	0.402588			L1PA3:LINE:L1:-	0.535014			LTR12C:LTR:ERV1:-	0.673127
SVA_D:Other:Other:+	0.01			L1PA3:LINE:L1:-	0.497076			LTR12C:LTR:ERV1:-	0.0277778
SVA_C:Other:Other:-	0.0532903			L1PA2:LINE:L1:+	0.268831			LTR12C:LTR:ERV1:+	0.758528
SVA_B:Other:Other:+	0.528712			L1PA6:LINE:L1:-	0.115556			LTR12C:LTR:ERV1:-	0.312412
SVA_D:Other:Other:+	0.65803			L1PA3:LINE:L1:+	0.209668			LTR12C:LTR:ERV1:-	0.634149
SVA_D:Other:Other:-	0.116731			L1PA3:LINE:L1:+	0.553175			LTR12C:LTR:ERV1:+	0.818362
SVA_D:Other:Other:+	0.0722261			L1PA3:LINE:L1:+	0.593162			LTR12C:LTR:ERV1:+	0.653332
SVA_F:Other:Other:-	0.0371429			L1PA4:LINE:L1:+	0.602222			LTR12C:LTR:ERV1:-	0.235664
SVA_F:Other:Other:+	0.00952381			L1PA5:LINE:L1:+	0.627945			LTR12_:LTR:ERV1:-	0.552381
SVA_C:Other:Other:+	0.0328924			L1PA6:LINE:L1:+	0.429932			LTR12C:LTR:ERV1:-	0.717005
SVA_C:Other:Other:-	0.0537815			L1PA7:LINE:L1:+	0.144286			LTR12C:LTR:ERV1:+	0.497718
SVA_C:Other:Other:-	0.488218			L1PA2:LINE:L1:-	0.675916			LTR12_:LTR:ERV1:+	0.333838
SVA_C:Other:Other:-	0.248018			L1PA6:LINE:L1:+	0.232359			LTR12C:LTR:ERV1:+	0.612703
SVA_D:Other:Other:-	0.131425			L1PA3:LINE:L1:+	0.353448			LTR12C:LTR:ERV1:+	0.0730442
SVA_D:Other:Other:-	0.289706			L1HS:LINE:L1:+	0.246296			LTR12C:LTR:ERV1:-	0.727293
SVA_C:Other:Other:+	0.105309			L1PA6:LINE:L1:+	0.422011			LTR12C:LTR:ERV1:+	0.232832
SVA_D:Other:Other:+	0.0178571			L1PA6:LINE:L1:-	0.393651			LTR12C:LTR:ERV1:+	0.734493
SVA_D:Other:Other:+	0.02			L1PA3:LINE:L1:+	0.548104			LTR12C:LTR:ERV1:-	0.104545
SVA_D:Other:Other:+	0.0211538			L1PA3:LINE:L1:-	0.446872			LTR12C:LTR:ERV1:-	0.118452
SVA_A:Other:Other:+	0.593312			L1PA5:LINE:L1:+	0.614177			LTR12C:LTR:ERV1:-	0.12963
SVA_B:Other:Other:+	0.339708			L1PA5:LINE:L1:+	0.751998			LTR12C:LTR:ERV1:-	0.306667
SVA_D:Other:Other:+	0.0764712			L1PA4:LINE:L1:+	0.719048			LTR12C:LTR:ERV1:+	0.0111842
SVA_C:Other:Other:-	0.201361			L1PA4:LINE:L1:+	0.697049			LTR12C:LTR:ERV1:-	0.607742
SVA_D:Other:Other:+	0.289744			L1PA8:LINE:L1:-	0.0436508			LTR12C:LTR:ERV1:+	0.590363
SVA_B:Other:Other:+	0			L1PA3:LINE:L1:-	0.247619			LTR12C:LTR:ERV1:+	0.56012
SVA_A:Other:Other:-	0.0868421			L1PA6:LINE:L1:+	0.13182			LTR12C:LTR:ERV1:+	0.299377
SVA_A:Other:Other:-	0.457636			L1PA7:LINE:L1:+	0.215873			LTR12C:LTR:ERV1:-	0.381556
SVA_C:Other:Other:-	0.717492			L1PA5:LINE:L1:-	0.53545			LTR12C:LTR:ERV1:-	0.0509921
SVA_B:Other:Other:+	0.302023			L1PA4:LINE:L1:-	0.440075			LTR12C:LTR:ERV1:-	0.657147
SVA_C:Other:Other:-	0.695938			L1PA6:LINE:L1:+	0.10846			LTR12C:LTR:ERV1:-	0.71073
SVA_D:Other:Other:+	0.454217			L1PA4:LINE:L1:+	0.790383			LTR12C:LTR:ERV1:-	0.112821
SVA_D:Other:Other:+	0.0252778			L1PA4:LINE:L1:+	0.485069			LTR12C:LTR:ERV1:-	0.756739
SVA_D:Other:Other:-	0.0420478			L1PA4:LINE:L1:+	0.446667			LTR12C:LTR:ERV1:+	0.503702
SVA_D:Other:Other:+	0.0353175			L1PA5:LINE:L1:-	0.545259			LTR12C:LTR:ERV1:+	0.0504762
SVA_D:Other:Other:-	0.273935			L1PA6:LINE:L1:-	0.428929			LTR12C:LTR:ERV1:+	0.611706
SVA_C:Other:Other:-	0.443514			L1PA3:LINE:L1:-	0.0727273			LTR12C:LTR:ERV1:-	0.23687
SVA_B:Other:Other:+	0.709739			L1PA2:LINE:L1:+	0.753997			LTR12C:LTR:ERV1:-	0.763736
SVA_D:Other:Other:-	0.491547			L1PA4:LINE:L1:+	0.687781			LTR12C:LTR:ERV1:-	0.289683
SVA_D:Other:Other:-	0.162257			L1PA3:LINE:L1:-	0.608102			LTR12D:LTR:ERV1:-	0.0652392
SVA_B:Other:Other:-	0.264354			L1PA6:LINE:L1:-	0.483871			LTR12C:LTR:ERV1:+	0.160317
SVA_B:Other:Other:+	0.0538889			L1PA7:LINE:L1:-	0.198718			LTR12C:LTR:ERV1:+	0.244574
SVA_D:Other:Other:+	0.230635			L1PA3:LINE:L1:-	0.48254			LTR12C:LTR:ERV1:-	0.0125
SVA_D:Other:Other:-	0.0111111			L1PA7:LINE:L1:+	0.212381			LTR12C:LTR:ERV1:+	0.148444
SVA_D:Other:Other:-	0.224185			L1PA4:LINE:L1:-	0.569643			LTR12C:LTR:ERV1:-	0.00877193
SVA_B:Other:Other:-	0.126494			L1PA7:LINE:L1:+	0.519223			LTR12C:LTR:ERV1:+	0.501071
SVA_D:Other:Other:-	0.064881			L1PA6:LINE:L1:-	0.214286			LTR12C:LTR:ERV1:-	0.433184
SVA_D:Other:Other:+	0.284318			L1PA4:LINE:L1:+	0.605208			LTR12C:LTR:ERV1:-	0.237169
SVA_B:Other:Other:+	0.0662121			L1PA5:LINE:L1:+	0.505819			LTR12C:LTR:ERV1:+	0.119009
SVA_B:Other:Other:+	0.227586			L1PA2:LINE:L1:-	0.0458333			LTR12C:LTR:ERV1:+	0.0176245
SVA_D:Other:Other:+	0.197875			L1PA3:LINE:L1:-	0.228596			LTR12C:LTR:ERV1:-	0.877338
SVA_D:Other:Other:-	0.78739			L1PA5:LINE:L1:+	0.186953			LTR12C:LTR:ERV1:+	0.214102
SVA_B:Other:Other:-	0.397788			L1PA6:LINE:L1:+	0.170238			LTR12C:LTR:ERV1:-	0.168452
SVA_B:Other:Other:+	0.0193197			L1PA7:LINE:L1:-	0.199423			LTR12C:LTR:ERV1:+	0.402742
SVA_A:Other:Other:-	0.67267			L1PA5:LINE:L1:-	0.49798			LTR12C:LTR:ERV1:+	0.142857
SVA_D:Other:Other:-	0			L1PA6:LINE:L1:+	0.116766			LTR12C:LTR:ERV1:-	0.075463
SVA_D:Other:Other:+	0.137671			L1PA4:LINE:L1:-	0.484603			LTR12C:LTR:ERV1:+	0.709549
SVA_B:Other:Other:+	0.134365			L1PA5:LINE:L1:-	0.600879			LTR12C:LTR:ERV1:-	0.819886
SVA_D:Other:Other:-	0.444512			L1PA6:LINE:L1:+	0.613201			LTR12C:LTR:ERV1:+	0.060119
SVA_C:Other:Other:-	0.194676			L1PA6:LINE:L1:+	0.498347			LTR12C:LTR:ERV1:+	0.39342
SVA_B:Other:Other:+	0.181849			L1PA5:LINE:L1:+	0.482974			LTR12C:LTR:ERV1:-	0.327108
SVA_E:Other:Other:-	0.0966667			L1PA6:LINE:L1:-	0.646649			LTR12C:LTR:ERV1:+	0.475683
SVA_D:Other:Other:+	0.117245			L1PA3:LINE:L1:-	0.502922			LTR12C:LTR:ERV1:-	0.478157
SVA_B:Other:Other:-	0.047619			L1PA5:LINE:L1:+	0.422253			LTR12C:LTR:ERV1:-	0.116117
SVA_F:Other:Other:-	0.647832			L1PA6:LINE:L1:-	0.211269			LTR12C:LTR:ERV1:-	0.346667
SVA_D:Other:Other:-	0.178233			L1PA3:LINE:L1:+	0.636147			LTR12C:LTR:ERV1:-	0.426524
SVA_D:Other:Other:+	0			L1PA5:LINE:L1:+	0.674603			LTR12C:LTR:ERV1:+	0.212081
SVA_D:Other:Other:+	0.147128			L1PA4:LINE:L1:+	0.514286			LTR12C:LTR:ERV1:-	0.0367364
SVA_D:Other:Other:+	0.063752			L1PA3:LINE:L1:-	0.0853741			LTR12D:LTR:ERV1:-	0.564144
SVA_C:Other:Other:+	0.428207			L1PA4:LINE:L1:+	0.659707			LTR12C:LTR:ERV1:+	0.338552
SVA_D:Other:Other:+	0.644444			L1PA6:LINE:L1:-	0.625061			LTR12C:LTR:ERV1:+	0.559103
SVA_B:Other:Other:+	0.0412179			L1PA6:LINE:L1:-	0.335238			LTR12C:LTR:ERV1:-	0.529854
SVA_E:Other:Other:+	0.0692577			L1PA2:LINE:L1:+	0.401143			LTR12C:LTR:ERV1:-	0.0119048
SVA_D:Other:Other:-	0.0255465			L1PA3:LINE:L1:-	0.376623			LTR12C:LTR:ERV1:+	0.2734
SVA_C:Other:Other:-	0.608326			L1PA4:LINE:L1:+	0.423545			LTR12C:LTR:ERV1:-	0.643084
SVA_F:Other:Other:-	0			L1PA3:LINE:L1:+	0.461905			LTR12C:LTR:ERV1:-	0.573043
SVA_C:Other:Other:-	0			L1PA3:LINE:L1:+	0.691006			LTR12C:LTR:ERV1:+	0.467446
SVA_D:Other:Other:+	0.0340064			L1PB1:LINE:L1:+	0.335606			LTR12C:LTR:ERV1:+	0.279422
SVA_C:Other:Other:+	0.042741			L1PA3:LINE:L1:+	0.1925			LTR12C:LTR:ERV1:-	0.244059
SVA_D:Other:Other:-	0.134524			L1PA5:LINE:L1:+	0.387879			LTR12D:LTR:ERV1:+	0.781693
SVA_D:Other:Other:-	0.137429			L1PA3:LINE:L1:+	0.549206			LTR12C:LTR:ERV1:+	0.456331
SVA_D:Other:Other:-	0.110231			L1PA7:LINE:L1:-	0.489683			LTR12C:LTR:ERV1:+	0.201319
SVA_D:Other:Other:-	0.183471			L1PA4:LINE:L1:+	0.297332			LTR12C:LTR:ERV1:-	0.911894
SVA_D:Other:Other:-	0.261429			L1PA3:LINE:L1:-	0.19838			LTR12C:LTR:ERV1:-	0.0726757
SVA_C:Other:Other:-	0.452163			L1PA2:LINE:L1:+	0.271886			LTR12C:LTR:ERV1:-	0.0308248
SVA_C:Other:Other:-	0.482292			L1PA4:LINE:L1:-	0.254823			LTR12C:LTR:ERV1:+	0.717225
SVA_D:Other:Other:+	0.337464			L1PA6:LINE:L1:+	0.355792			LTR12C:LTR:ERV1:+	0.153326
SVA_D:Other:Other:-	0.0105263			L1PA5:LINE:L1:+	0.435445			LTR12C:LTR:ERV1:-	0.633568
SVA_B:Other:Other:-	0.0457745			L1PA5:LINE:L1:+	0.429972			LTR12C:LTR:ERV1:-	0.904716
SVA_D:Other:Other:+	0.160516			L1PA3:LINE:L1:-	0.107143			LTR12:LTR:ERV1:+	0.222939
SVA_D:Other:Other:-	0.0442857			L1PA5:LINE:L1:+	0.311255			LTR12C:LTR:ERV1:-	0.257205
SVA_D:Other:Other:-	0.242247			L1PA4:LINE:L1:+	0.482709			LTR12D:LTR:ERV1:-	0.503247
SVA_D:Other:Other:+	0.0154321			L1PA2:LINE:L1:+	0.330119			LTR12C:LTR:ERV1:-	0.651346
SVA_D:Other:Other:-	0.0811688			L1PA2:LINE:L1:-	0.15619			LTR12C:LTR:ERV1:+	0.127279
SVA_D:Other:Other:-	0.432729			L1PA5:LINE:L1:-	0.542091			LTR12C:LTR:ERV1:-	0.04
SVA_D:Other:Other:-	0.266224			L1PA4:LINE:L1:-	0.615693			LTR12C:LTR:ERV1:+	0.590374
SVA_D:Other:Other:-	0.381903			L1PA4:LINE:L1:+	0.24417			LTR12C:LTR:ERV1:-	0.689087
SVA_D:Other:Other:-	0.396388			L1PA5:LINE:L1:+	0.272531			LTR12C:LTR:ERV1:-	0.488294
SVA_B:Other:Other:+	0.198441			L1PA4:LINE:L1:+	0.452262			LTR12:LTR:ERV1:+	0.26859
SVA_D:Other:Other:-	0.0505102			L1PA7:LINE:L1:+	0.207003			LTR12C:LTR:ERV1:+	0.703909
SVA_D:Other:Other:-	0.0649068			L1PA2:LINE:L1:+	0.530714			LTR12C:LTR:ERV1:-	0.482321
SVA_D:Other:Other:+	0.1364			L1PA4:LINE:L1:+	0.41336			LTR12C:LTR:ERV1:-	0.628634
SVA_C:Other:Other:+	0.315955			L1PA7:LINE:L1:+	0.0960317			LTR12C:LTR:ERV1:-	0.572917
SVA_D:Other:Other:+	0.0047619			L1PA3:LINE:L1:+	0.330556			LTR12D:LTR:ERV1:-	0.102083
SVA_C:Other:Other:+	0.636091			L1PA3:LINE:L1:-	0.471789			LTR12C:LTR:ERV1:+	0.0555556
SVA_F:Other:Other:+	0.167373			L1PA6:LINE:L1:+	0.565909			LTR12C:LTR:ERV1:-	0.515556
SVA_D:Other:Other:+	0.535653			L1PA3:LINE:L1:-	0.481985			LTR12C:LTR:ERV1:-	0.00877193
SVA_D:Other:Other:-	0.06875			L1PA4:LINE:L1:-	0.716064			LTR12C:LTR:ERV1:-	0.471349
SVA_D:Other:Other:+	0.0318182			L1PA3:LINE:L1:+	0.606975			LTR12C:LTR:ERV1:-	0.747248
SVA_C:Other:Other:-	0.375534			L1PA3:LINE:L1:+	0.448918			LTR12C:LTR:ERV1:+	0.100722
SVA_D:Other:Other:+	0.501946			L1PA4:LINE:L1:-	0.664935			LTR12D:LTR:ERV1:-	0.0185185
SVA_A:Other:Other:-	0.840301			L1PA4:LINE:L1:-	0.554762			LTR12C:LTR:ERV1:+	0.302663
SVA_D:Other:Other:+	0.625622			L1PA4:LINE:L1:-	0.5663			LTR12E:LTR:ERV1:+	0.102222
SVA_C:Other:Other:-	0.547023			L1PA7:LINE:L1:-	0.209259			LTR12C:LTR:ERV1:+	0.0131766
SVA_E:Other:Other:-	0.443878			L1PA2:LINE:L1:-	0.155944			LTR12C:LTR:ERV1:+	0.190476
SVA_D:Other:Other:+	0.278124			L1PA7:LINE:L1:-	0.135014			LTR12C:LTR:ERV1:-	0.0479515
SVA_B:Other:Other:+	0.143681			L1PA5:LINE:L1:+	0.630787			LTR12C:LTR:ERV1:+	0.495988
SVA_B:Other:Other:+	0.248214			L1PA7:LINE:L1:+	0.166486			LTR12C:LTR:ERV1:+	0.108905
SVA_F:Other:Other:+	0.132946			L1PA6:LINE:L1:+	0.487213			LTR12C:LTR:ERV1:-	0.828464
SVA_D:Other:Other:+	0.0811289			L1PA6:LINE:L1:+	0.42684			LTR12C:LTR:ERV1:-	0.789453
SVA_B:Other:Other:+	0.311603			L1PA5:LINE:L1:-	0.582766			LTR12C:LTR:ERV1:+	0.636833
SVA_D:Other:Other:+	0.670953			L1PA4:LINE:L1:+	0.506002			LTR12C:LTR:ERV1:-	0.483333
SVA_D:Other:Other:-	0.171429			L1PA6:LINE:L1:-	0.440079			LTR12C:LTR:ERV1:+	0.543755
SVA_C:Other:Other:+	0.20744			L1PA4:LINE:L1:+	0.68335			LTR12C:LTR:ERV1:+	0.798088
SVA_D:Other:Other:+	0.35959			L1PB1:LINE:L1:+	0.317949			LTR12C:LTR:ERV1:+	0.304899
SVA_D:Other:Other:+	0.185287			L1PA2:LINE:L1:-	0.381534			LTR12C:LTR:ERV1:+	0.223583
SVA_F:Other:Other:+	0.338266			L1PA3:LINE:L1:-	0.639432			LTR12C:LTR:ERV1:+	0.668486
SVA_D:Other:Other:-	0.190642			L1PA2:LINE:L1:-	0.0625			LTR12C:LTR:ERV1:-	0.562856
SVA_B:Other:Other:-	0.633116			L1PA3:LINE:L1:+	0.770996			LTR12C:LTR:ERV1:+	0.0483245
SVA_D:Other:Other:-	0.0647392			L1PA2:LINE:L1:-	0.577143			LTR12C:LTR:ERV1:+	0.482291
SVA_B:Other:Other:+	0.0969045			L1PA3:LINE:L1:-	0.12314			LTR12C:LTR:ERV1:+	0.320062
SVA_D:Other:Other:+	0.423413			L1PA3:LINE:L1:-	0.444156			LTR12C:LTR:ERV1:-	0.211251
SVA_D:Other:Other:-	0.112186			L1PA2:LINE:L1:+	0.136177			LTR12C:LTR:ERV1:+	0.574156
SVA_B:Other:Other:-	0.0185185			L1PA5:LINE:L1:+	0.546684			LTR12C:LTR:ERV1:+	0.602726
SVA_D:Other:Other:+	0.00549451			L1PA6:LINE:L1:+	0.482051			LTR12C:LTR:ERV1:-	0.751044
SVA_C:Other:Other:+	0.339394			L1PA8:LINE:L1:-	0.484086			LTR12C:LTR:ERV1:-	0.724244
SVA_D:Other:Other:-	0.507292			L1PA3:LINE:L1:-	0.595652			LTR12C:LTR:ERV1:-	0.338431
SVA_D:Other:Other:+	0.305846			L1PA5:LINE:L1:-	0.380763			LTR12C:LTR:ERV1:+	0.418463
SVA_D:Other:Other:+	0.710085			L1PA6:LINE:L1:-	0.523069			LTR12D:LTR:ERV1:-	0.225198
SVA_B:Other:Other:-	0.0805556			L1PA5:LINE:L1:+	0.781973			LTR12C:LTR:ERV1:+	0.580468
SVA_C:Other:Other:+	0.0381466			L1PA4:LINE:L1:+	0.5244			LTR12D:LTR:ERV1:-	0.276667
SVA_F:Other:Other:-	0.447718			L1PA8A:LINE:L1:+	0.37869			LTR12D:LTR:ERV1:+	0.85771
SVA_C:Other:Other:+	0.652316			L1PA3:LINE:L1:+	0.521677			LTR12C:LTR:ERV1:+	0.273621
SVA_B:Other:Other:+	0.326302			L1PA4:LINE:L1:-	0.601587			LTR12C:LTR:ERV1:+	0.484821
SVA_A:Other:Other:-	0.858601			L1PA6:LINE:L1:+	0.337852			LTR12C:LTR:ERV1:+	0.112226
SVA_F:Other:Other:-	0.246914			L1PA3:LINE:L1:+	0.553084			LTR12C:LTR:ERV1:-	0.560291
SVA_D:Other:Other:+	0.349601			L1PA5:LINE:L1:-	0.658615			LTR12C:LTR:ERV1:+	0.485584
SVA_D:Other:Other:+	0.244079			L1PA3:LINE:L1:-	0.570726			LTR12C:LTR:ERV1:+	0.595513
SVA_A:Other:Other:-	0.741923			L1PA4:LINE:L1:-	0.53387			LTR12C:LTR:ERV1:-	0.839161
SVA_B:Other:Other:+	0.478169			L1PA7:LINE:L1:-	0.141905			LTR12C:LTR:ERV1:+	0.805599
SVA_B:Other:Other:+	0.0749487			L1PA2:LINE:L1:-	0.0965035			LTR12C:LTR:ERV1:-	0.761389
SVA_F:Other:Other:+	0.282307			L1PA4:LINE:L1:-	0.458209			LTR12C:LTR:ERV1:+	0.327847
SVA_D:Other:Other:+	0.146218			L1PA6:LINE:L1:-	0.459365			LTR12C:LTR:ERV1:+	0.226631
SVA_D:Other:Other:-	0.179043			L1PA5:LINE:L1:-	0.498709			LTR12C:LTR:ERV1:-	0.233441
SVA_F:Other:Other:-	0.117403			L1PA2:LINE:L1:+	0.597024			LTR12C:LTR:ERV1:-	0.0916667
SVA_B:Other:Other:+	0.0524943			L1PA5:LINE:L1:-	0.574507			LTR12E:LTR:ERV1:-	0.421964
SVA_C:Other:Other:-	0.02			L1PA5:LINE:L1:+	0.478139			LTR12C:LTR:ERV1:+	0.626865
SVA_B:Other:Other:-	0.105368			L1PA4:LINE:L1:+	0.553698			LTR12C:LTR:ERV1:-	0.764426
SVA_F:Other:Other:-	0.0747669			L1PA4:LINE:L1:+	0.582143			LTR12C:LTR:ERV1:-	0.372619
SVA_D:Other:Other:-	0.682768			L1PA2:LINE:L1:+	0.360435			LTR12D:LTR:ERV1:-	0.401278
SVA_D:Other:Other:+	0.0579832			L1PA3:LINE:L1:+	0.800521			LTR12C:LTR:ERV1:+	0.0923077
SVA_D:Other:Other:-	0.0885582			L1PA5:LINE:L1:+	0.606516			LTR12D:LTR:ERV1:+	0.208503
SVA_D:Other:Other:-	0.256126			L1PA6:LINE:L1:+	0.250198			LTR12C:LTR:ERV1:+	0.246656
SVA_C:Other:Other:+	0.319778			L1PA6:LINE:L1:-	0.151311			LTR12C:LTR:ERV1:+	0.217172
SVA_B:Other:Other:-	0.401967			L1PA5:LINE:L1:+	0.473557			LTR12C:LTR:ERV1:+	0.843152
SVA_D:Other:Other:+	0.290838			L1PA5:LINE:L1:-	0.692404			LTR12C:LTR:ERV1:-	0.599242
SVA_B:Other:Other:-	0.501647			L1PA5:LINE:L1:+	0.725762			LTR12C:LTR:ERV1:-	0.888375
SVA_D:Other:Other:+	0.143311			L1PA4:LINE:L1:+	0			LTR12C:LTR:ERV1:-	0.0285714
SVA_D:Other:Other:+	0.533863			L1PA4:LINE:L1:+	0.811244			LTR12C:LTR:ERV1:+	0.781393
SVA_D:Other:Other:+	0.0990706			L1PA5:LINE:L1:+	0.526667			LTR12C:LTR:ERV1:-	0.707253
SVA_F:Other:Other:-	0.441897			L1PA3:LINE:L1:+	0.165773			LTR12C:LTR:ERV1:+	0.302733
SVA_D:Other:Other:-	0.685582			L1PB2:LINE:L1:+	0.13			LTR12C:LTR:ERV1:-	0.16064
SVA_D:Other:Other:-	0.169753			L1PA3:LINE:L1:+	0.702885			LTR12C:LTR:ERV1:-	0.783617
SVA_B:Other:Other:-	0.00925926			L1PA6:LINE:L1:-	0.15489			LTR12C:LTR:ERV1:+	0.168036
SVA_D:Other:Other:-	0.218838			L1PA5:LINE:L1:-	0.494268			LTR12C:LTR:ERV1:-	0.675694
SVA_B:Other:Other:-	0.202489			L1PA5:LINE:L1:-	0.722712			LTR12C:LTR:ERV1:+	0.160953
SVA_C:Other:Other:+	0.265375			L1PA5:LINE:L1:+	0.492785			LTR12C:LTR:ERV1:-	0.513293
SVA_D:Other:Other:+	0.0246212			L1PA3:LINE:L1:-	0.566667			LTR12C:LTR:ERV1:-	0.0646104
SVA_D:Other:Other:-	0.171553			L1PA2:LINE:L1:-	0.106667			LTR12C:LTR:ERV1:+	0.456877
SVA_D:Other:Other:+	0.146627			L1PA3:LINE:L1:+	0.581548			LTR12C:LTR:ERV1:-	0.611273
SVA_D:Other:Other:+	0.694329			L1PA4:LINE:L1:-	0.469955			LTR12C:LTR:ERV1:-	0.848857
SVA_D:Other:Other:-	0.0253968			L1PA4:LINE:L1:-	0.619444			LTR12C:LTR:ERV1:-	0.714582
SVA_B:Other:Other:-	0.395419			L1PA4:LINE:L1:+	0.558333			LTR12D:LTR:ERV1:-	0.175893
SVA_D:Other:Other:-	0.378571			L1PA5:LINE:L1:-	0.597344			LTR12C:LTR:ERV1:+	0.12085
SVA_D:Other:Other:-	0			L1PA7:LINE:L1:-	0.0439935			LTR12D:LTR:ERV1:+	0.323375
SVA_D:Other:Other:+	0.268585			L1PA7:LINE:L1:-	0.498299			LTR12C:LTR:ERV1:-	0.789807
SVA_D:Other:Other:+	0.0210526			L1PA6:LINE:L1:-	0.275017			LTR12C:LTR:ERV1:+	0.403988
SVA_C:Other:Other:+	0.444243			L1PA5:LINE:L1:-	0.268986			LTR12C:LTR:ERV1:-	0.154229
SVA_B:Other:Other:-	0.372783			L1PA7:LINE:L1:+	0.158358			LTR12C:LTR:ERV1:+	0.643157
SVA_D:Other:Other:+	0.0490575			L1PA3:LINE:L1:-	0.643723			LTR12C:LTR:ERV1:-	0.539505
SVA_C:Other:Other:-	0.297857			L1PA5:LINE:L1:-	0.570218			LTR12C:LTR:ERV1:+	0.586458
SVA_B:Other:Other:+	0.325134			L1PA7:LINE:L1:-	0.519913			LTR12C:LTR:ERV1:+	0.018287
SVA_D:Other:Other:+	0.114588			L1PA5:LINE:L1:+	0.284829			LTR12C:LTR:ERV1:-	0.115344
SVA_A:Other:Other:+	0.845405			L1PA7:LINE:L1:+	0.23801			LTR12C:LTR:ERV1:+	0.332415
SVA_B:Other:Other:-	0.603274			L1PA5:LINE:L1:+	0.560049			LTR12C:LTR:ERV1:+	0.466982
SVA_D:Other:Other:-	0.482653			L1PA7:LINE:L1:-	0.0589744			LTR12C:LTR:ERV1:-	0.339497
SVA_D:Other:Other:+	0.109803			L1PA3:LINE:L1:+	0.597105			LTR12C:LTR:ERV1:-	0.778439
SVA_D:Other:Other:+	0.369754			L1PA7:LINE:L1:-	0.303463			LTR12C:LTR:ERV1:-	0.558201
SVA_D:Other:Other:+	0.0756489			L1PA3:LINE:L1:+	0.327083			LTR12C:LTR:ERV1:+	0.630548
SVA_C:Other:Other:-	0.22791			L1PA3:LINE:L1:+	0.719761			LTR12C:LTR:ERV1:-	0.81991
SVA_D:Other:Other:+	0.109864			L1PA4:LINE:L1:-	0.529563			LTR12C:LTR:ERV1:+	0
SVA_D:Other:Other:-	0			L1PA5:LINE:L1:-	0.507738			LTR12:LTR:ERV1:+	0.417857
SVA_B:Other:Other:-	0.736675			L1PA5:LINE:L1:-	0.684165			LTR12C:LTR:ERV1:-	0.207568
SVA_D:Other:Other:+	0.614618			L1PA5:LINE:L1:-	0.6818			LTR12C:LTR:ERV1:-	0.0042735
SVA_D:Other:Other:-	0.219444			L1PA4:LINE:L1:+	0.126316			LTR12C:LTR:ERV1:-	0.226333
SVA_D:Other:Other:+	0.662449			L1PA4:LINE:L1:+	0.375			LTR12C:LTR:ERV1:+	0.182857
SVA_C:Other:Other:-	0.726047			L1PA2:LINE:L1:-	0.405254			LTR12C:LTR:ERV1:-	0.16498
SVA_A:Other:Other:+	0.61827			L1PA4:LINE:L1:-	0.584603			LTR12D:LTR:ERV1:-	0.380565
SVA_F:Other:Other:-	0.615289			L1PA4:LINE:L1:-	0.798139			LTR12C:LTR:ERV1:-	0.169048
SVA_B:Other:Other:+	0.396787			L1PA6:LINE:L1:+	0.315202			LTR12C:LTR:ERV1:-	0.457431
SVA_B:Other:Other:-	0.75711			L1PA3:LINE:L1:+	0.655664			LTR12C:LTR:ERV1:+	0.657357
SVA_F:Other:Other:-	0.154845			L1PA5:LINE:L1:-	0.657509			LTR12C:LTR:ERV1:+	0.0270833
SVA_B:Other:Other:+	0.116423			L1PA5:LINE:L1:+	0.699543			LTR12_:LTR:ERV1:+	0.743333
SVA_D:Other:Other:+	0.197522			L1PA3:LINE:L1:+	0.449263			LTR12C:LTR:ERV1:+	0.730951
SVA_D:Other:Other:+	0.364388			L1PA5:LINE:L1:-	0.496356			LTR12C:LTR:ERV1:+	0.0392857
SVA_A:Other:Other:+	0.120148			L1PA3:LINE:L1:-	0.629206			LTR12C:LTR:ERV1:-	0.01875
SVA_A:Other:Other:+	0.815789			L1PA3:LINE:L1:+	0.497321			LTR12E:LTR:ERV1:-	0.0429952
SVA_D:Other:Other:-	0.55738			L1PA2:LINE:L1:+	0.0514286			LTR12C:LTR:ERV1:-	0.301246
SVA_A:Other:Other:+	0.625674			L1PREC2:LINE:L1:+	0.190997			LTR12C:LTR:ERV1:-	0.506149
SVA_D:Other:Other:-	0.30276			L1PA4:LINE:L1:+	0.60873			LTR12C:LTR:ERV1:+	0.213375
SVA_D:Other:Other:+	0.177602			L1PA4:LINE:L1:+	0.56785			LTR12E:LTR:ERV1:-	0.740495
SVA_D:Other:Other:-	0.503402			L1PA8:LINE:L1:-	0.396667			LTR12C:LTR:ERV1:-	0.596964
SVA_B:Other:Other:+	0.149254			L1PA3:LINE:L1:-	0.77323			LTR12C:LTR:ERV1:-	0.651904
SVA_B:Other:Other:+	0.147101			L1PA4:LINE:L1:+	0.618983			LTR12C:LTR:ERV1:-	0.32169
SVA_D:Other:Other:+	0.451048			L1PA3:LINE:L1:-	0.618754			LTR12C:LTR:ERV1:-	0.830269
SVA_B:Other:Other:+	0.197239			L1PA3:LINE:L1:-	0.550251			LTR12C:LTR:ERV1:+	0.825995
SVA_F:Other:Other:+	0.178968			L1PA2:LINE:L1:+	0.491978			LTR12C:LTR:ERV1:+	0.76045
SVA_B:Other:Other:-	0.676548			L1PA6:LINE:L1:+	0.322109			LTR12C:LTR:ERV1:+	0.113276
SVA_D:Other:Other:+	0.0813665			L1PA3:LINE:L1:+	0.662434			LTR12D:LTR:ERV1:-	0.479891
SVA_D:Other:Other:-	0.608333			L1PA8:LINE:L1:+	0.661429			LTR12C:LTR:ERV1:+	0.148085
SVA_D:Other:Other:+	0.399206			L1PA4:LINE:L1:-	0.534329			LTR12C:LTR:ERV1:-	0.409373
SVA_D:Other:Other:+	0.374687			L1PA6:LINE:L1:-	0.377778			LTR12C:LTR:ERV1:+	0.712259
SVA_D:Other:Other:+	0.0253968			L1PA7:LINE:L1:-	0.201005			LTR12C:LTR:ERV1:+	0.0406845
SVA_D:Other:Other:-	0.0204545			L1PA6:LINE:L1:+	0.287121			LTR12C:LTR:ERV1:+	0.111842
SVA_C:Other:Other:+	0.722037			L1PA4:LINE:L1:-	0.512599			LTR12C:LTR:ERV1:+	0.706146
SVA_B:Other:Other:+	0.848652			L1PA4:LINE:L1:+	0.621123			LTR12C:LTR:ERV1:-	0.107917
SVA_B:Other:Other:+	0.025582			L1PA3:LINE:L1:-	0.373482			LTR12C:LTR:ERV1:-	0.723253
SVA_E:Other:Other:+	0.04			L1PA5:LINE:L1:+	0.381151			LTR12C:LTR:ERV1:-	0.0115327
SVA_B:Other:Other:+	0.650987			L1PA4:LINE:L1:+	0.602026			LTR12_:LTR:ERV1:+	0.440007
SVA_B:Other:Other:+	0.824084			L1PA6:LINE:L1:+	0.35957			LTR12C:LTR:ERV1:+	0.221352
SVA_C:Other:Other:+	0.649849			L1PA4:LINE:L1:-	0.647051			LTR12C:LTR:ERV1:+	0.735481
SVA_C:Other:Other:-	0.510994			L1PA2:LINE:L1:+	0.351173			LTR12C:LTR:ERV1:-	0.7295
SVA_D:Other:Other:-	0.0403846			L1PA5:LINE:L1:+	0.567976			LTR12C:LTR:ERV1:+	0.752173
SVA_B:Other:Other:+	0.253338			L1PA5:LINE:L1:-	0.633333			LTR12C:LTR:ERV1:-	0.344922
SVA_F:Other:Other:-	0.0675214			L1PA3:LINE:L1:+	0.675549			LTR12:LTR:ERV1:+	0.381471
SVA_D:Other:Other:-	0.0280702			L1PA7:LINE:L1:+	0.514744			LTR12C:LTR:ERV1:+	0.154655
SVA_B:Other:Other:-	0.345918			L1PA4:LINE:L1:+	0.546508			LTR12C:LTR:ERV1:-	0.230952
SVA_D:Other:Other:-	0.65734			L1PA3:LINE:L1:+	0.508455			LTR12C:LTR:ERV1:+	0.271268
SVA_B:Other:Other:-	0.111556			L1HS:LINE:L1:-	0.234055			LTR12D:LTR:ERV1:+	0.511706
SVA_D:Other:Other:-	0.0883811			L1PA4:LINE:L1:-	0.44632			LTR12C:LTR:ERV1:-	0.620419
SVA_D:Other:Other:+	0.0352513			L1PA4:LINE:L1:-	0.717937			LTR12C:LTR:ERV1:+	0.0190476
SVA_D:Other:Other:-	0.0555556			L1PA5:LINE:L1:-	0.63719			LTR12D:LTR:ERV1:-	0.0365591
SVA_D:Other:Other:+	0.67287			L1PA2:LINE:L1:-	0.428333			LTR12C:LTR:ERV1:+	0.557713
SVA_C:Other:Other:-	0.524145			L1PA3:LINE:L1:+	0.254308			LTR12_:LTR:ERV1:+	0.304444
SVA_C:Other:Other:+	0.028836			L1PA3:LINE:L1:-	0.660714			LTR12C:LTR:ERV1:-	0.258226
SVA_B:Other:Other:+	0.643834			L1PA5:LINE:L1:-	0.472307			LTR12C:LTR:ERV1:-	0.0360979
SVA_F:Other:Other:-	0.0315789			L1PA6:LINE:L1:+	0.459664			LTR12C:LTR:ERV1:+	0.209317
SVA_D:Other:Other:-	0.0799172			L1PA6:LINE:L1:-	0.441882			LTR12C:LTR:ERV1:-	0.785012
SVA_D:Other:Other:-	0.0895382			L1PA7:LINE:L1:-	0.257353			LTR12C:LTR:ERV1:+	0.292782
SVA_D:Other:Other:-	0.271944			L1PA6:LINE:L1:+	0.324074			LTR12C:LTR:ERV1:-	0.886532
SVA_B:Other:Other:-	0.0181818			L1PA7:LINE:L1:+	0.308852			LTR12C:LTR:ERV1:-	0.403108
SVA_D:Other:Other:-	0.66962			L1PA7:LINE:L1:+	0.0297619			LTR12C:LTR:ERV1:-	0.69601
SVA_B:Other:Other:-	0.151294			L1PA3:LINE:L1:-	0.423696			LTR12D:LTR:ERV1:+	0.707507
SVA_B:Other:Other:-	0.247552			L1PA3:LINE:L1:+	0.0579877			LTR12C:LTR:ERV1:+	0.844983
SVA_B:Other:Other:-	0.147534			L1PA3:LINE:L1:+	0.471263			LTR12C:LTR:ERV1:-	0.892332
SVA_D:Other:Other:-	0.323052			L1PA6:LINE:L1:+	0.460084			LTR12C:LTR:ERV1:+	0.369553
SVA_C:Other:Other:-	0.280132			L1PA4:LINE:L1:-	0.599048			LTR12C:LTR:ERV1:-	0.311742
SVA_D:Other:Other:+	0.0357935			L1PA6:LINE:L1:-	0.3575			LTR12C:LTR:ERV1:-	0.0976407
SVA_C:Other:Other:+	0.0128205			L1PA5:LINE:L1:+	0.301746			LTR12C:LTR:ERV1:+	0.304761
SVA_D:Other:Other:+	0.259027			L1PA4:LINE:L1:-	0.519617			LTR12C:LTR:ERV1:-	0.164865
SVA_D:Other:Other:-	0.0516425			L1PA4:LINE:L1:+	0.585317			LTR12C:LTR:ERV1:-	0.0963455
SVA_C:Other:Other:+	0.0269393			L1PA4:LINE:L1:-	0.56414			LTR12C:LTR:ERV1:+	0.240141
SVA_A:Other:Other:-	0.639625			L1PA2:LINE:L1:+	0.25671			LTR12C:LTR:ERV1:+	0.602999
SVA_B:Other:Other:+	0.228468			L1PA3:LINE:L1:+	0.439002			LTR12C:LTR:ERV1:+	0.503407
SVA_C:Other:Other:+	0.390425			L1PA3:LINE:L1:+	0.523529			LTR12C:LTR:ERV1:+	0.104025
SVA_D:Other:Other:+	0.139947			L1PA4:LINE:L1:+	0.257206			LTR12C:LTR:ERV1:-	0.812721
SVA_B:Other:Other:+	0.0480368			L1PA4:LINE:L1:-	0.655017			LTR12C:LTR:ERV1:-	0.770338
SVA_C:Other:Other:+	0.0934815			L1PA4:LINE:L1:+	0.530647			LTR12C:LTR:ERV1:+	0.606441
SVA_B:Other:Other:+	0.304034			L1PA4:LINE:L1:+	0.479046			LTR12C:LTR:ERV1:-	0.553886
SVA_B:Other:Other:+	0.120408			L1PA5:LINE:L1:-	0.620202			LTR12D:LTR:ERV1:-	0.666691
SVA_D:Other:Other:-	0.495682			L1PA3:LINE:L1:+	0.644414			LTR12C:LTR:ERV1:+	0.518728
SVA_D:Other:Other:-	0.105873			L1PA4:LINE:L1:+	0.463294			LTR12C:LTR:ERV1:+	0.333107
SVA_D:Other:Other:-	0.0755245			L1PA3:LINE:L1:-	0.459307			LTR12C:LTR:ERV1:+	0.489896
SVA_D:Other:Other:+	0.092785			L1PA5:LINE:L1:-	0.677342			LTR12D:LTR:ERV1:-	0.0214286
SVA_D:Other:Other:+	0.160183			L1PA2:LINE:L1:+	0.571118			LTR12C:LTR:ERV1:+	0.0676479
SVA_B:Other:Other:+	0.557692			L1PA6:LINE:L1:+	0.751149			LTR12C:LTR:ERV1:+	0.808065
SVA_C:Other:Other:+	0.451612			L1PA7:LINE:L1:+	0.364494			LTR12C:LTR:ERV1:+	0.803182
SVA_B:Other:Other:+	0.210724			L1PA5:LINE:L1:+	0.404162			LTR12C:LTR:ERV1:+	0.851305
SVA_D:Other:Other:+	0.0690741			L1PA3:LINE:L1:-	0.544822			LTR12C:LTR:ERV1:-	0.666962
SVA_B:Other:Other:-	0.114066			L1PA2:LINE:L1:+	0.480556			LTR12C:LTR:ERV1:+	0.191242
SVA_D:Other:Other:+	0.209429			L1PA3:LINE:L1:+	0.55162			LTR12C:LTR:ERV1:-	0.659721
SVA_B:Other:Other:+	0.38858			L1PA5:LINE:L1:-	0.705849			LTR12C:LTR:ERV1:+	0.396173
SVA_B:Other:Other:+	0.240097			L1PA3:LINE:L1:-	0.485833			LTR12C:LTR:ERV1:-	0.594643
SVA_D:Other:Other:-	0.252098			L1PA4:LINE:L1:-	0.325641			LTR12C:LTR:ERV1:-	0.518761
SVA_D:Other:Other:+	0.0942857			L1PA3:LINE:L1:+	0.624542			LTR12:LTR:ERV1:+	0.326141
SVA_B:Other:Other:-	0.805782			L1PA7:LINE:L1:+	0.0979798			LTR12C:LTR:ERV1:+	0.139229
SVA_B:Other:Other:+	0.431935			L1PA6:LINE:L1:+	0.338294			LTR12C:LTR:ERV1:+	0.653644
SVA_B:Other:Other:+	0.116683			L1PA6:LINE:L1:+	0.219286			LTR12C:LTR:ERV1:-	0.209704
SVA_D:Other:Other:-	0.135476			L1PA4:LINE:L1:+	0.684821			LTR12C:LTR:ERV1:-	0.686742
SVA_B:Other:Other:+	0.475914			L1PA4:LINE:L1:+	0.621138			LTR12C:LTR:ERV1:+	0.826151
SVA_A:Other:Other:-	0.746291			L1PA5:LINE:L1:-	0.538576			LTR12C:LTR:ERV1:+	0.194866
SVA_D:Other:Other:-	0.106349			L1PA3:LINE:L1:+	0.509371			LTR12:LTR:ERV1:+	0.674624
SVA_B:Other:Other:+	0.486941			L1PA3:LINE:L1:-	0.548566			LTR12C:LTR:ERV1:+	0.761199
SVA_D:Other:Other:+	0.191721			L1PA3:LINE:L1:-	0.523143			LTR12C:LTR:ERV1:-	0.733294
SVA_B:Other:Other:+	0.0124656			L1PA3:LINE:L1:-	0.62674			LTR12C:LTR:ERV1:-	0.077422
SVA_B:Other:Other:+	0.0887338			L1PA2:LINE:L1:+	0.419066			LTR12C:LTR:ERV1:+	0.0660364
SVA_D:Other:Other:+	0.0474545			L1PA3:LINE:L1:-	0.258442			LTR12_:LTR:ERV1:+	0.813361
SVA_D:Other:Other:-	0.325139			L1PA3:LINE:L1:-	0.610623			LTR12C:LTR:ERV1:-	0.64401
SVA_B:Other:Other:+	0.632276			L1PA5:LINE:L1:-	0.493939			LTR12C:LTR:ERV1:-	0.533595
SVA_B:Other:Other:+	0.476987			L1PA2:LINE:L1:+	0.0799451			LTR12C:LTR:ERV1:+	0.842212
SVA_D:Other:Other:-	0.0842294			L1PA4:LINE:L1:+	0.47551			LTR12C:LTR:ERV1:-	0.673347
SVA_C:Other:Other:+	0.297142			L1PA3:LINE:L1:+	0.515079			LTR12C:LTR:ERV1:-	0.344473
SVA_D:Other:Other:+	0.0599773			L1PA4:LINE:L1:-	0.518452			LTR12C:LTR:ERV1:+	0.697642
SVA_D:Other:Other:+	0.471078			L1PA5:LINE:L1:+	0.365861			LTR12C:LTR:ERV1:-	0.225681
SVA_B:Other:Other:+	0.446728			L1PA4:LINE:L1:+	0.610615			LTR12C:LTR:ERV1:-	0.767569
SVA_B:Other:Other:+	0.0617406			L1PA6:LINE:L1:+	0.491881			LTR12C:LTR:ERV1:-	0.724846
SVA_F:Other:Other:-	0.148088			L1PA4:LINE:L1:+	0.37641			LTR12C:LTR:ERV1:+	0.618072
SVA_E:Other:Other:+	0.320163			L1PA4:LINE:L1:+	0.300723			LTR12C:LTR:ERV1:+	0.403639
SVA_D:Other:Other:-	0.115816			L1PA5:LINE:L1:+	0.434127			LTR12C:LTR:ERV1:+	0.287222
SVA_C:Other:Other:+	0.291705			L1PA6:LINE:L1:+	0.518218			LTR12C:LTR:ERV1:+	0.0402299
SVA_B:Other:Other:-	0.0204365			L1PA4:LINE:L1:-	0.608039			LTR12C:LTR:ERV1:+	0.300472
SVA_D:Other:Other:-	0.177579			L1PA3:LINE:L1:+	0.509982			LTR12C:LTR:ERV1:+	0.858688
SVA_D:Other:Other:-	0.00909091			L1PA3:LINE:L1:+	0.591415			LTR12C:LTR:ERV1:+	0.232011
SVA_A:Other:Other:+	0.115424			L1PA3:LINE:L1:-	0.768813			LTR12C:LTR:ERV1:+	0.0912281
SVA_C:Other:Other:+	0.327143			L1PA7:LINE:L1:+	0.405392			LTR12C:LTR:ERV1:+	0.0346542
SVA_D:Other:Other:-	0.0963745			L1PA4:LINE:L1:+	0.530303			LTR12C:LTR:ERV1:+	0.0633333
SVA_D:Other:Other:+	0.0950864			L1PA3:LINE:L1:-	0.365699			LTR12C:LTR:ERV1:+	0.0199457
SVA_B:Other:Other:-	0.398874			L1PA7:LINE:L1:-	0.310417			LTR12C:LTR:ERV1:+	0.556475
SVA_B:Other:Other:+	0.0918791			L1PA5:LINE:L1:-	0.454894			LTR12C:LTR:ERV1:-	0.369437
SVA_D:Other:Other:+	0.0244444			L1PA4:LINE:L1:-	0.316667			LTR12C:LTR:ERV1:-	0.860424
SVA_B:Other:Other:-	0.345082			L1PA3:LINE:L1:-	0.50744			LTR12C:LTR:ERV1:+	0.585849
SVA_D:Other:Other:+	0.556956			L1PA4:LINE:L1:+	0.426055			LTR12C:LTR:ERV1:-	0.378022
SVA_D:Other:Other:-	0.025			L1PA3:LINE:L1:-	0.38127			LTR12D:LTR:ERV1:-	0.397557
SVA_C:Other:Other:-	0.097619			L1PA3:LINE:L1:-	0.583459			LTR12C:LTR:ERV1:-	0.928364
SVA_D:Other:Other:+	0.309108			L1PA3:LINE:L1:-	0.612004			LTR12C:LTR:ERV1:+	0.614846
SVA_D:Other:Other:-	0.0648287			L1PA4:LINE:L1:-	0.60469			LTR12C:LTR:ERV1:+	0.260195
SVA_D:Other:Other:+	0.814413			L1PA2:LINE:L1:+	0.46578			LTR12C:LTR:ERV1:-	0.279923
SVA_F:Other:Other:-	0.691671			L1PA8:LINE:L1:+	0.14826			LTR12C:LTR:ERV1:-	0.797732
SVA_D:Other:Other:+	0.438925			L1PA3:LINE:L1:+	0.103333			LTR12C:LTR:ERV1:-	0.715688
SVA_D:Other:Other:+	0.0226498			L1PA4:LINE:L1:+	0.545933			LTR12:LTR:ERV1:+	0.468189
SVA_D:Other:Other:-	0.0598828			L1PA2:LINE:L1:-	0.0416667			LTR12C:LTR:ERV1:+	0.0127962
SVA_D:Other:Other:+	0.0205882			L1PA5:LINE:L1:-	0.766667			LTR12C:LTR:ERV1:+	0.159783
SVA_D:Other:Other:-	0.112649			L1PA3:LINE:L1:-	0.760088			LTR12C:LTR:ERV1:+	0.35636
SVA_C:Other:Other:-	0.639535			L1PA5:LINE:L1:+	0.498371			LTR12C:LTR:ERV1:+	0.659782
SVA_D:Other:Other:-	0.468358			L1PA8:LINE:L1:+	0.145455			LTR12C:LTR:ERV1:-	0.289492
SVA_D:Other:Other:+	0.0255952			L1PA2:LINE:L1:+	0.304029			LTR12C:LTR:ERV1:+	0.130605
SVA_C:Other:Other:+	0.0282738			L1PA2:LINE:L1:-	0.531463			LTR12C:LTR:ERV1:-	0.442822
SVA_D:Other:Other:+	0.0924825			L1PA3:LINE:L1:+	0.557238			LTR12C:LTR:ERV1:+	0.330711
SVA_D:Other:Other:-	0.0728175			L1PA8A:LINE:L1:-	0.262523			LTR12C:LTR:ERV1:-	0.54198
SVA_B:Other:Other:-	0.150188			L1PA2:LINE:L1:-	0.0151515			LTR12C:LTR:ERV1:+	0.484988
SVA_B:Other:Other:-	0.366177			L1PA5:LINE:L1:-	0.654947			LTR12C:LTR:ERV1:+	0.659309
SVA_C:Other:Other:+	0.633047			L1PA5:LINE:L1:+	0.469167			LTR12C:LTR:ERV1:+	0.582152
SVA_A:Other:Other:+	0.688133			L1PA3:LINE:L1:-	0.488776			LTR12C:LTR:ERV1:+	0
SVA_A:Other:Other:-	0.797533			L1PA6:LINE:L1:-	0.631429			LTR12C:LTR:ERV1:+	0.616387
SVA_D:Other:Other:+	0.33033			L1PA4:LINE:L1:+	0.5937			LTR12C:LTR:ERV1:+	0.570376
SVA_C:Other:Other:-	0.243563			L1PB1:LINE:L1:-	0.321905			LTR12C:LTR:ERV1:+	0.250714
SVA_D:Other:Other:-	0.436852			L1PA5:LINE:L1:-	0.704708			LTR12C:LTR:ERV1:-	0.0526984
SVA_D:Other:Other:+	0.312526			L1PA2:LINE:L1:-	0.412431			LTR12C:LTR:ERV1:-	0.330601
SVA_B:Other:Other:-	0.477403			L1PA4:LINE:L1:+	0.621088			LTR12C:LTR:ERV1:+	0.283974
SVA_A:Other:Other:-	0.430886			L1PA5:LINE:L1:-	0.174868			LTR12C:LTR:ERV1:-	0.605411
SVA_D:Other:Other:-	0.175863			L1PA4:LINE:L1:+	0.552083			LTR12C:LTR:ERV1:+	0.580384
SVA_D:Other:Other:-	0.0918519			L1PA6:LINE:L1:+	0.583066			LTR12C:LTR:ERV1:+	0.69053
SVA_D:Other:Other:-	0.149327			L1PA6:LINE:L1:-	0.0484848			LTR12C:LTR:ERV1:+	0.484364
SVA_C:Other:Other:-	0.0685752			L1PA4:LINE:L1:-	0.552381			LTR12C:LTR:ERV1:+	0.278704
SVA_D:Other:Other:-	0.124334			L1PA7:LINE:L1:+	0.228816			LTR12C:LTR:ERV1:+	0.368859
SVA_D:Other:Other:-	0.0642857			L1PA2:LINE:L1:-	0.682738			LTR12C:LTR:ERV1:-	0.178286
SVA_D:Other:Other:-	0.0484782			L1PA5:LINE:L1:+	0.470862			LTR12C:LTR:ERV1:-	0.437351
SVA_D:Other:Other:-	0.0186667			L1PA4:LINE:L1:-	0.663988			LTR12C:LTR:ERV1:+	0.0344828
SVA_A:Other:Other:-	0.773439			L1PA3:LINE:L1:-	0.604496			LTR12C:LTR:ERV1:-	0.0414747
SVA_B:Other:Other:-	0.197828			L1PA4:LINE:L1:+	0.694498			LTR12C:LTR:ERV1:-	0.059127
SVA_D:Other:Other:+	0.113651			L1PA4:LINE:L1:-	0.377778			LTR12C:LTR:ERV1:+	0.396345
SVA_A:Other:Other:+	0.277778			L1PA2:LINE:L1:+	0.718615			LTR12C:LTR:ERV1:-	0.786853
SVA_D:Other:Other:-	0.124286			L1PA2:LINE:L1:-	0.170635			LTR12D:LTR:ERV1:-	0.475608
SVA_D:Other:Other:+	0.0963719			L1PA6:LINE:L1:+	0.385714			LTR12C:LTR:ERV1:+	0.0559006
SVA_D:Other:Other:-	0.0779762			L1PB1:LINE:L1:+	0.579059			LTR12C:LTR:ERV1:+	0.284399
SVA_D:Other:Other:+	0.1902			L1PA4:LINE:L1:+	0.446032			LTR12C:LTR:ERV1:+	0.364188
SVA_B:Other:Other:+	0.805181			L1PA4:LINE:L1:+	0.656448			LTR12C:LTR:ERV1:+	0.655137
SVA_A:Other:Other:+	0.620834			L1PA2:LINE:L1:+	0.430303			LTR12:LTR:ERV1:+	0.427778
SVA_C:Other:Other:+	0.568555			L1PA7:LINE:L1:-	0.190909			LTR12C:LTR:ERV1:-	0.6681
SVA_D:Other:Other:-	0.404767			L1PA4:LINE:L1:-	0.38315			LTR12D:LTR:ERV1:-	0.5726
SVA_B:Other:Other:-	0.402656			L1PA4:LINE:L1:-	0.588915			LTR12C:LTR:ERV1:-	0.839052
SVA_B:Other:Other:+	0.105861			L1PA4:LINE:L1:+	0.442136			LTR12C:LTR:ERV1:+	0.662698
SVA_D:Other:Other:+	0.125794			L1PA2:LINE:L1:-	0.476667			LTR12C:LTR:ERV1:+	0.679072
SVA_D:Other:Other:-	0.408315			L1PA5:LINE:L1:+	0.49206			LTR12E:LTR:ERV1:+	0.710714
SVA_D:Other:Other:-	0.0875902			L1PA7:LINE:L1:+	0.593122			LTR12:LTR:ERV1:+	0.166667
SVA_C:Other:Other:+	0.145816			L1HS:LINE:L1:-	0.316667			LTR12C:LTR:ERV1:-	0.494568
SVA_C:Other:Other:+	0.286417			L1PA3:LINE:L1:-	0.423148			LTR12C:LTR:ERV1:-	0.0208333
SVA_B:Other:Other:+	0.59512			L1PA8:LINE:L1:+	0.231602			LTR12C:LTR:ERV1:-	0.0740869
SVA_D:Other:Other:-	0.198173			L1PA4:LINE:L1:-	0.639591			LTR12C:LTR:ERV1:+	0.34724
SVA_C:Other:Other:+	0.356495			L1PA2:LINE:L1:+	0.440448			LTR12C:LTR:ERV1:+	0.719311
SVA_D:Other:Other:-	0.530724			L1PA3:LINE:L1:-	0.640476			LTR12C:LTR:ERV1:-	0.842434
SVA_D:Other:Other:-	0.257143			L1PA6:LINE:L1:-	0.115079			LTR12C:LTR:ERV1:+	0.0771626
SVA_A:Other:Other:-	0.664323			L1PA8:LINE:L1:-	0.1125			LTR12C:LTR:ERV1:+	0.594334
SVA_C:Other:Other:+	0.201611			L1PA3:LINE:L1:-	0.684615			LTR12C:LTR:ERV1:-	0.686296
SVA_D:Other:Other:-	0.431019			L1PA2:LINE:L1:+	0.0204082			LTR12C:LTR:ERV1:-	0.835411
SVA_D:Other:Other:-	0.225714			L1PA5:LINE:L1:-	0.504274			LTR12C:LTR:ERV1:+	0.614045
SVA_D:Other:Other:+	0.112665			L1PA3:LINE:L1:-	0.133929			LTR12C:LTR:ERV1:-	0.339206
SVA_C:Other:Other:+	0.167536			L1PA7:LINE:L1:+	0.310119			LTR12C:LTR:ERV1:+	0.637312
SVA_D:Other:Other:+	0.223507			L1PA4:LINE:L1:+	0.290972			LTR12C:LTR:ERV1:+	0.243723
SVA_D:Other:Other:-	0.105754			L1PA3:LINE:L1:+	0.737969			LTR12C:LTR:ERV1:-	0.57873
SVA_D:Other:Other:-	0.465942			L1PA7:LINE:L1:+	0.167155			LTR12C:LTR:ERV1:-	0.534964
SVA_C:Other:Other:-	0.144593			L1PA5:LINE:L1:+	0.666606			LTR12C:LTR:ERV1:+	0.02
SVA_C:Other:Other:-	0.426897			L1PA7:LINE:L1:+	0.0662698			LTR12C:LTR:ERV1:-	0.495079
SVA_B:Other:Other:+	0.394132			L1PA7:LINE:L1:+	0			LTR12C:LTR:ERV1:-	0.341944
SVA_D:Other:Other:+	0.495355			L1PA3:LINE:L1:-	0.647035			LTR12C:LTR:ERV1:+	0.749664
SVA_D:Other:Other:+	0.568787			L1PA4:LINE:L1:+	0.402597			LTR12C:LTR:ERV1:-	0.3698
SVA_B:Other:Other:-	0.506533			L1PA7:LINE:L1:+	0.280589			LTR12C:LTR:ERV1:-	0.583995
SVA_B:Other:Other:-	0.301852			L1PA6:LINE:L1:+	0.579233			LTR12D:LTR:ERV1:+	0.352381
SVA_F:Other:Other:-	0.00958188			L1PA3:LINE:L1:-	0.599346			LTR12C:LTR:ERV1:-	0.780203
SVA_D:Other:Other:-	0.499288			L1PA3:LINE:L1:+	0.610697			LTR12:LTR:ERV1:+	0.592762
SVA_D:Other:Other:+	0.684893			L1PA4:LINE:L1:+	0.560139			LTR12C:LTR:ERV1:-	0.920952
SVA_A:Other:Other:+	0.761524			L1PA4:LINE:L1:+	0.546667			LTR12C:LTR:ERV1:-	0.407049
SVA_D:Other:Other:-	0.0285714			L1PA7:LINE:L1:+	0.40959			LTR12C:LTR:ERV1:-	0.172173
SVA_B:Other:Other:-	0.107961			L1PA5:LINE:L1:-	0.529233			LTR12C:LTR:ERV1:-	0.384774
SVA_D:Other:Other:-	0.39			L1PA3:LINE:L1:-	0.582051			LTR12C:LTR:ERV1:-	0.449153
SVA_A:Other:Other:+	0.559161			L1PA3:LINE:L1:-	0.174286			LTR12C:LTR:ERV1:+	0.631711
SVA_C:Other:Other:-	0.0980392			L1PA7:LINE:L1:+	0.187368			LTR12C:LTR:ERV1:+	0.771138
SVA_D:Other:Other:-	0.45592			L1PA3:LINE:L1:+	0.538152			LTR12:LTR:ERV1:+	0.514177
SVA_B:Other:Other:+	0.316687			L1PA3:LINE:L1:+	0.517927			LTR12C:LTR:ERV1:+	0.169418
SVA_D:Other:Other:-	0.185268			L1PA5:LINE:L1:+	0.128788			LTR12C:LTR:ERV1:+	0.659897
SVA_D:Other:Other:-	0.11263			L1PA3:LINE:L1:-	0.6329			LTR12C:LTR:ERV1:+	0.0411111
SVA_D:Other:Other:-	0.24758			L1PA4:LINE:L1:-	0.65399			LTR12C:LTR:ERV1:-	0.205331
SVA_B:Other:Other:-	0.161138			L1PA3:LINE:L1:+	0.720288			LTR12C:LTR:ERV1:+	0.807776
SVA_B:Other:Other:+	0.0139847			L1PA6:LINE:L1:+	0.753968			LTR12C:LTR:ERV1:+	0.569535
SVA_B:Other:Other:+	0.0737107			L1PA5:LINE:L1:-	0.12465			LTR12C:LTR:ERV1:+	0.724068
SVA_A:Other:Other:-	0.535462			L1PA6:LINE:L1:+	0.633333			LTR12C:LTR:ERV1:-	0.034127
SVA_D:Other:Other:+	0.015625			L1PA6:LINE:L1:-	0.416905			LTR12C:LTR:ERV1:-	0.322126
SVA_F:Other:Other:-	0.0636236			L1PA5:LINE:L1:+	0.609924			LTR12C:LTR:ERV1:-	0.0817016
SVA_D:Other:Other:-	0.132121			L1PA4:LINE:L1:-	0.693785			LTR12C:LTR:ERV1:-	0.401966
SVA_D:Other:Other:-	0.347741			L1PA3:LINE:L1:+	0.502066			LTR12C:LTR:ERV1:+	0.708601
SVA_D:Other:Other:-	0.10904			L1PA2:LINE:L1:-	0.094709			LTR12C:LTR:ERV1:+	0.231994
SVA_D:Other:Other:+	0.0181818			L1PA4:LINE:L1:+	0.564679			LTR12C:LTR:ERV1:+	0.230736
SVA_B:Other:Other:-	0.0442939			L1PA7:LINE:L1:+	0.234226			LTR12C:LTR:ERV1:+	0.0539796
SVA_C:Other:Other:+	0.0622688			L1PA5:LINE:L1:+	0.581803			LTR12C:LTR:ERV1:+	0.1
SVA_B:Other:Other:-	0.0615232			L1PA4:LINE:L1:+	0.598571			LTR12C:LTR:ERV1:+	0.65049
SVA_F:Other:Other:-	0.0656002			L1PA4:LINE:L1:-	0.60114			LTR12C:LTR:ERV1:+	0.811858
SVA_C:Other:Other:-	0.133486			L1PA7:LINE:L1:+	0.383631			LTR12C:LTR:ERV1:-	0.030303
SVA_D:Other:Other:-	0.0454832			L1PA3:LINE:L1:-	0.325595			LTR12C:LTR:ERV1:-	0.497004
SVA_D:Other:Other:-	0.0709596			L1PA5:LINE:L1:-	0.371478			LTR12C:LTR:ERV1:-	0.37919
SVA_D:Other:Other:-	0.300315			L1PA6:LINE:L1:+	0.166667			LTR12C:LTR:ERV1:+	0.656821
SVA_D:Other:Other:+	0.0714727			L1PA6:LINE:L1:+	0.169231			LTR12C:LTR:ERV1:-	0.147429
SVA_B:Other:Other:+	0.202907			L1PA3:LINE:L1:+	0.282429			LTR12C:LTR:ERV1:+	0.248952
SVA_B:Other:Other:+	0.389832			L1PA3:LINE:L1:-	0.394683			LTR12C:LTR:ERV1:+	0.55849
SVA_C:Other:Other:+	0.649013			L1PA3:LINE:L1:+	0.488312			LTR12C:LTR:ERV1:+	0.230189
SVA_A:Other:Other:+	0.466232			L1PA2:LINE:L1:-	0.299517			LTR12C:LTR:ERV1:+	0.115278
SVA_C:Other:Other:-	0.0770308			L1PA6:LINE:L1:-	0.70747			LTR12C:LTR:ERV1:-	0.624829
SVA_A:Other:Other:-	0.611806			L1PA2:LINE:L1:-	0.123077			LTR12C:LTR:ERV1:+	0.181016
SVA_D:Other:Other:-	0.417896			L1PA4:LINE:L1:+	0.399306			LTR12C:LTR:ERV1:+	0.519734
SVA_D:Other:Other:-	0.111765			L1PA7:LINE:L1:+	0.259524			LTR12C:LTR:ERV1:-	0.225702
SVA_D:Other:Other:-	0.348633			L1PA7:LINE:L1:+	0.0785714			LTR12C:LTR:ERV1:+	0.779449
SVA_C:Other:Other:-	0.56178			L1PA7:LINE:L1:+	0.291596			LTR12C:LTR:ERV1:-	0.570143
SVA_F:Other:Other:+	0.590598			L1PA6:LINE:L1:+	0.42381			LTR12C:LTR:ERV1:-	0.677778
SVA_D:Other:Other:-	0.243067			L1PA5:LINE:L1:-	0.597175			LTR12C:LTR:ERV1:+	0.578798
SVA_D:Other:Other:+	0.503815			L1PB1:LINE:L1:-	0.0801587			LTR12C:LTR:ERV1:+	0.15873
SVA_C:Other:Other:-	0.611929			L1PA4:LINE:L1:+	0.54263			LTR12C:LTR:ERV1:-	0.0773611
SVA_D:Other:Other:+	0.271875			L1PA5:LINE:L1:+	0.41619			LTR12C:LTR:ERV1:+	0.457689
SVA_D:Other:Other:-	0.377108			L1PA6:LINE:L1:+	0.449867			LTR12C:LTR:ERV1:+	0.766989
SVA_C:Other:Other:-	0.212245			L1PA3:LINE:L1:+	0.56			LTR12C:LTR:ERV1:-	0.0694444
SVA_D:Other:Other:-	0.138492			L1PA7:LINE:L1:-	0.450505			LTR12C:LTR:ERV1:-	0.216719
SVA_D:Other:Other:+	0.00454545			L1PA5:LINE:L1:-	0.352778			LTR12C:LTR:ERV1:-	0.025641
SVA_D:Other:Other:+	0.173769			L1PA4:LINE:L1:+	0.549541			LTR12C:LTR:ERV1:-	0.231111
SVA_D:Other:Other:+	0.0102041			L1PA2:LINE:L1:+	0.639394			LTR12C:LTR:ERV1:-	0.105093
SVA_F:Other:Other:+	0.116883			L1PA5:LINE:L1:+	0.0901786			LTR12C:LTR:ERV1:+	0.39463
SVA_C:Other:Other:-	0.161362			L1PA2:LINE:L1:-	0.416567			LTR12C:LTR:ERV1:+	0.0912972
SVA_D:Other:Other:+	0.126927			L1PA4:LINE:L1:+	0.666087			LTR12C:LTR:ERV1:+	0.621273
SVA_D:Other:Other:-	0.123281			L1PA5:LINE:L1:+	0.482981			LTR12C:LTR:ERV1:+	0.555951
SVA_B:Other:Other:+	0.118192			L1PA5:LINE:L1:+	0.502748			LTR12C:LTR:ERV1:+	0.651521
SVA_C:Other:Other:+	0.607276			L1PA6:LINE:L1:-	0.591236			LTR12C:LTR:ERV1:-	0.481539
SVA_B:Other:Other:-	0.71252			L1PA4:LINE:L1:+	0.644812			LTR12C:LTR:ERV1:-	0.0877001
SVA_C:Other:Other:+	0.0992932			L1PA4:LINE:L1:+	0.627381			LTR12C:LTR:ERV1:+	0.352461
SVA_D:Other:Other:-	0.30178			L1PA5:LINE:L1:+	0.638853			LTR12C:LTR:ERV1:-	0.339819
SVA_C:Other:Other:-	0.622001			L1PB1:LINE:L1:+	0.423929			LTR12C:LTR:ERV1:+	0.703527
SVA_D:Other:Other:-	0.158048			L1PA4:LINE:L1:-	0.397937			LTR12C:LTR:ERV1:-	0.0357143
SVA_B:Other:Other:-	0.37048			L1PA2:LINE:L1:+	0.664827			LTR12C:LTR:ERV1:-	0.685864
SVA_D:Other:Other:-	0.0595571			L1PA5:LINE:L1:+	0.758874			LTR12C:LTR:ERV1:-	0.233208
SVA_B:Other:Other:+	0.0146199			L1PA4:LINE:L1:+	0.353788			LTR12C:LTR:ERV1:-	0.505844
SVA_D:Other:Other:+	0.130266			L1PA4:LINE:L1:+	0.37598			LTR12C:LTR:ERV1:-	0.728877
SVA_D:Other:Other:+	0.0652611			L1PA2:LINE:L1:+	0.307196			LTR12C:LTR:ERV1:-	0.715024
SVA_D:Other:Other:-	0.254669			L1PA6:LINE:L1:+	0.252778			LTR12C:LTR:ERV1:+	0.187685
SVA_D:Other:Other:+	0.524157			L1PA7:LINE:L1:-	0.587804			LTR12C:LTR:ERV1:-	0.0294214
SVA_D:Other:Other:-	0.392857			L1PA3:LINE:L1:+	0.438038			LTR12C:LTR:ERV1:-	0.384933
SVA_B:Other:Other:+	0.344674			L1PA3:LINE:L1:+	0.537092			LTR12C:LTR:ERV1:+	0.429719
SVA_F:Other:Other:+	0.0766245			L1PA5:LINE:L1:-	0.468367			LTR12C:LTR:ERV1:-	0.117225
SVA_A:Other:Other:-	0.694224			L1PA6:LINE:L1:+	0.286905			LTR12C:LTR:ERV1:-	0.109245
SVA_B:Other:Other:+	0.0733178			L1PA2:LINE:L1:+	0.466837			LTR12C:LTR:ERV1:+	0.0590439
SVA_D:Other:Other:+	0.079196			L1PA7:LINE:L1:+	0.25682			LTR12C:LTR:ERV1:-	0.0942641
SVA_E:Other:Other:-	0.0153846			L1PA5:LINE:L1:+	0.477228			LTR12C:LTR:ERV1:-	0.510317
SVA_D:Other:Other:+	0.20369			L1PA4:LINE:L1:-	0.486746			LTR12:LTR:ERV1:+	0.615952
SVA_C:Other:Other:+	0.054386			L1PA5:LINE:L1:-	0.406667			LTR12C:LTR:ERV1:-	0.740817
SVA_D:Other:Other:-	0.593525			L1PA5:LINE:L1:-	0.611929			LTR12C:LTR:ERV1:-	0.725573
SVA_D:Other:Other:+	0.0747288			L1PA2:LINE:L1:-	0.194372			LTR12C:LTR:ERV1:+	0.71299
SVA_D:Other:Other:+	0.0785714			L1PA5:LINE:L1:+	0.492949			LTR12C:LTR:ERV1:+	0.186729
SVA_E:Other:Other:+	0.16014			L1PA5:LINE:L1:-	0.666838			LTR12C:LTR:ERV1:-	0.183871
SVA_D:Other:Other:+	0.0746032			L1PA5:LINE:L1:+	0.297436			LTR12C:LTR:ERV1:+	0.726524
SVA_D:Other:Other:-	0.50368			L1PA5:LINE:L1:-	0.629048			LTR12C:LTR:ERV1:-	0.05
SVA_D:Other:Other:+	0.0357336			L1PA3:LINE:L1:+	0.649093			LTR12C:LTR:ERV1:+	0.448994
SVA_A:Other:Other:-	0.323118			L1PA2:LINE:L1:+	0.240171			LTR12C:LTR:ERV1:+	0.5522
SVA_D:Other:Other:+	0.108601			L1PA5:LINE:L1:+	0.495671			LTR12C:LTR:ERV1:-	0.369057
SVA_B:Other:Other:+	0.698157			L1PA4:LINE:L1:+	0.578231			LTR12C:LTR:ERV1:+	0.284283
SVA_B:Other:Other:+	0.134084			L1PA6:LINE:L1:-	0.266667			LTR12C:LTR:ERV1:+	0.495
SVA_A:Other:Other:+	0.80526			L1PA5:LINE:L1:-	0.204004			LTR12C:LTR:ERV1:+	0.299713
SVA_D:Other:Other:+	0.0892514			L1HS:LINE:L1:+	0.207837			LTR12C:LTR:ERV1:+	0.645521
SVA_A:Other:Other:-	0.747597			L1PA4:LINE:L1:+	0.401411			LTR12C:LTR:ERV1:+	0.422583
SVA_B:Other:Other:+	0.237736			L1PA3:LINE:L1:-	0.0857143			LTR12C:LTR:ERV1:-	0.458754
SVA_D:Other:Other:+	0			L1PA7:LINE:L1:+	0.492262			LTR12C:LTR:ERV1:-	0.377972
SVA_D:Other:Other:+	0.381048			L1PA3:LINE:L1:+	0.218012			LTR12C:LTR:ERV1:-	0.294125
SVA_D:Other:Other:+	0.169468			L1PA4:LINE:L1:+	0.651058			LTR12C:LTR:ERV1:-	0.710002
SVA_A:Other:Other:+	0.693237			L1PA4:LINE:L1:-	0.72881			LTR12C:LTR:ERV1:-	0.0672679
SVA_D:Other:Other:-	0.0259921			L1PA4:LINE:L1:+	0.657702			LTR12C:LTR:ERV1:-	0.0402357
SVA_D:Other:Other:-	0.399134			L1PA3:LINE:L1:+	0.561932			LTR12C:LTR:ERV1:-	0.622744
SVA_D:Other:Other:-	0.636485			L1PA4:LINE:L1:-	0.68646			LTR12E:LTR:ERV1:+	0.085019
SVA_B:Other:Other:+	0.123698			L1PA4:LINE:L1:-	0.594444			LTR12C:LTR:ERV1:-	0.771795
SVA_D:Other:Other:+	0.244475			L1PA4:LINE:L1:+	0.619246			LTR12E:LTR:ERV1:+	0.0195402
SVA_D:Other:Other:+	0.0137709			L1PA6:LINE:L1:-	0.486752			LTR12C:LTR:ERV1:-	0.10946
SVA_D:Other:Other:-	0.13647			L1PA3:LINE:L1:+	0.4297			LTR12D:LTR:ERV1:-	0.439319
SVA_D:Other:Other:+	0.148193			L1PA2:LINE:L1:-	0.22619			LTR12C:LTR:ERV1:-	0.865608
SVA_C:Other:Other:+	0.0300899			L1PA8:LINE:L1:+	0.285			LTR12C:LTR:ERV1:-	0.884008
SVA_C:Other:Other:+	0.169826			L1PA5:LINE:L1:+	0.619242			LTR12C:LTR:ERV1:-	0.172403
SVA_C:Other:Other:+	0.0570282			L1PA2:LINE:L1:-	0.428287			LTR12C:LTR:ERV1:-	0.51552
SVA_F:Other:Other:-	0.0513822			L1PA7:LINE:L1:-	0.331593			LTR12C:LTR:ERV1:+	0.103761
SVA_D:Other:Other:-	0			L1PA5:LINE:L1:-	0.752315			LTR12C:LTR:ERV1:-	0.114774
SVA_D:Other:Other:-	0.140765			L1PA2:LINE:L1:-	0.79			LTR12C:LTR:ERV1:+	0.50625
SVA_B:Other:Other:+	0.373477			L1PA7:LINE:L1:-	0.388488			LTR12C:LTR:ERV1:+	0.516635
SVA_D:Other:Other:-	0.162821			L1PA5:LINE:L1:+	0.48665			LTR12C:LTR:ERV1:+	0
SVA_A:Other:Other:+	0.826415			L1PA2:LINE:L1:-	0.212574			LTR12C:LTR:ERV1:+	0.342744
SVA_B:Other:Other:-	0.0182073			L1PA6:LINE:L1:-	0.298571			LTR12C:LTR:ERV1:-	0.821236
SVA_D:Other:Other:+	0.136742			L1PA4:LINE:L1:-	0.587731			LTR12D:LTR:ERV1:+	0.78
SVA_D:Other:Other:-	0.426869			L1PA3:LINE:L1:+	0.66041			LTR12C:LTR:ERV1:+	0.0521371
SVA_C:Other:Other:+	0.0459711			L1PA2:LINE:L1:-	0.163636			LTR12C:LTR:ERV1:-	0.016987
SVA_C:Other:Other:+	0.270179			L1PA6:LINE:L1:+	0.240278			LTR12C:LTR:ERV1:-	0.26746
SVA_B:Other:Other:+	0.156186			L1PA7:LINE:L1:-	0.332323			LTR12C:LTR:ERV1:-	0.549627
SVA_D:Other:Other:+	0.19787			L1PA5:LINE:L1:+	0.381534			LTR12C:LTR:ERV1:+	0.792884
SVA_C:Other:Other:-	0.250959			L1PA3:LINE:L1:-	0.623961			LTR12C:LTR:ERV1:+	0.326401
SVA_D:Other:Other:+	0.462722			L1PA3:LINE:L1:+	0.652143			LTR12C:LTR:ERV1:-	0.760968
SVA_B:Other:Other:+	0.0925265			L1P1:LINE:L1:-	0.570788			LTR12C:LTR:ERV1:+	0.197876
SVA_D:Other:Other:-	0.192162			L1PA5:LINE:L1:+	0.413472			LTR12C:LTR:ERV1:-	0.715426
SVA_C:Other:Other:+	0.0667427			L1PA7:LINE:L1:-	0.325183			LTR12C:LTR:ERV1:+	0.24623
SVA_A:Other:Other:+	0.364538			L1PA4:LINE:L1:+	0.55303			LTR12D:LTR:ERV1:+	0.267619
SVA_C:Other:Other:-	0.0655303			L1PA5:LINE:L1:-	0.587879			LTR12C:LTR:ERV1:+	0.163889
SVA_A:Other:Other:-	0.57434			L1PA3:LINE:L1:+	0.683835			LTR12C:LTR:ERV1:+	0.669084
SVA_D:Other:Other:+	0.527571			L1PA5:LINE:L1:-	0.629048			LTR12C:LTR:ERV1:+	0.605729
SVA_C:Other:Other:+	0.0203373			L1PA3:LINE:L1:+	0.586147			LTR12C:LTR:ERV1:-	0.801306
SVA_A:Other:Other:+	0.649863			L1PA4:LINE:L1:+	0.671053			LTR12C:LTR:ERV1:-	0.79424
SVA_D:Other:Other:-	0.0727243			L1PA2:LINE:L1:-	0.595238			LTR12C:LTR:ERV1:+	0.777965
SVA_C:Other:Other:+	0.122643			L1PA4:LINE:L1:+	0.579788			LTR12C:LTR:ERV1:+	0.702361
SVA_D:Other:Other:+	0.148469			L1PA4:LINE:L1:+	0.55127			LTR12C:LTR:ERV1:+	0.609909
SVA_F:Other:Other:+	0.20406			L1PA4:LINE:L1:-	0.426531			LTR12C:LTR:ERV1:-	0.802381
SVA_D:Other:Other:-	0.642875			L1PA3:LINE:L1:+	0.764707			LTR12C:LTR:ERV1:+	0.350425
SVA_A:Other:Other:-	0.373079			L1PA4:LINE:L1:-	0.51619			LTR12C:LTR:ERV1:-	0.111477
SVA_D:Other:Other:+	0.422649			L1PA3:LINE:L1:-	0.570952			LTR12C:LTR:ERV1:+	0.371181
SVA_B:Other:Other:+	0.224295			L1PA4:LINE:L1:+	0.48958			LTR12C:LTR:ERV1:-	0.26862
SVA_D:Other:Other:-	0.0131579			L1PA3:LINE:L1:-	0.655688			LTR12C:LTR:ERV1:-	0.739502
SVA_D:Other:Other:+	0.274898			L1PA5:LINE:L1:+	0.0579125			LTR12C:LTR:ERV1:-	0.181397
SVA_C:Other:Other:+	0.423602			L1PA6:LINE:L1:+	0.0920635			LTR12C:LTR:ERV1:-	0.377304
SVA_B:Other:Other:-	0.205205			L1PA7:LINE:L1:+	0.169926			LTR12C:LTR:ERV1:+	0.653767
SVA_D:Other:Other:-	0.399464			L1PA4:LINE:L1:-	0.669048			LTR12C:LTR:ERV1:+	0.48751
SVA_B:Other:Other:+	0.574588			L1PA4:LINE:L1:+	0.594783			LTR12C:LTR:ERV1:+	0.323991
SVA_E:Other:Other:-	0.138933			L1PA7:LINE:L1:+	0.0822562			LTR12:LTR:ERV1:+	0.391277
SVA_D:Other:Other:-	0.558943			L1PA5:LINE:L1:+	0.556385			LTR12C:LTR:ERV1:-	0.800951
SVA_D:Other:Other:+	0.107586			L1PA4:LINE:L1:+	0.461667			LTR12C:LTR:ERV1:-	0.58063
SVA_B:Other:Other:-	0.357651			L1PA4:LINE:L1:-	0.376515			LTR12C:LTR:ERV1:+	0.277315
SVA_B:Other:Other:-	0.0172258			L1PA3:LINE:L1:-	0.142222			LTR12C:LTR:ERV1:+	0.730841
SVA_D:Other:Other:-	0.574214			L1PA5:LINE:L1:-	0.638499			LTR12C:LTR:ERV1:+	0.609159
SVA_D:Other:Other:-	0.18533			L1PA3:LINE:L1:+	0.645389			LTR12C:LTR:ERV1:+	0.75119
SVA_D:Other:Other:-	0.610941			L1PA4:LINE:L1:+	0.664596			LTR12C:LTR:ERV1:+	0.648889
SVA_A:Other:Other:+	0.367978			L1PA6:LINE:L1:+	0.666692			LTR12C:LTR:ERV1:-	0.663937
SVA_B:Other:Other:-	0.381508			L1PA6:LINE:L1:+	0.381217			LTR12C:LTR:ERV1:-	0.511508
SVA_D:Other:Other:+	0.216112			L1PA4:LINE:L1:+	0.495278			LTR12C:LTR:ERV1:-	0.1
SVA_B:Other:Other:+	0.262665			L1PA3:LINE:L1:-	0.559699			LTR12C:LTR:ERV1:-	0.38854
SVA_D:Other:Other:-	0.468034			L1PA7:LINE:L1:+	0.507051			LTR12C:LTR:ERV1:-	0.127654
SVA_D:Other:Other:-	0.109751			L1PA3:LINE:L1:+	0.579969			LTR12C:LTR:ERV1:-	0.298988
SVA_D:Other:Other:-	0			L1PA2:LINE:L1:+	0.595654			LTR12C:LTR:ERV1:+	0.314873
SVA_D:Other:Other:-	0.0111111			L1PA4:LINE:L1:+	0.637108			LTR12C:LTR:ERV1:+	0.0157828
SVA_C:Other:Other:+	0.178661			L1PA4:LINE:L1:+	0.213165			LTR12C:LTR:ERV1:-	0.64697
SVA_D:Other:Other:+	0.0768185			L1PA4:LINE:L1:+	0.544562			LTR12C:LTR:ERV1:-	0.868114
SVA_D:Other:Other:+	0.393879			L1PA3:LINE:L1:+	0.680159			LTR12C:LTR:ERV1:-	0.757957
SVA_C:Other:Other:-	0.344111			L1PA4:LINE:L1:+	0.558754			LTR12C:LTR:ERV1:-	0.101859
SVA_D:Other:Other:+	0.350611			L1PA4:LINE:L1:-	0.67608			LTR12C:LTR:ERV1:-	0.330933
SVA_B:Other:Other:+	0.291195			L1PA3:LINE:L1:+	0.765221			LTR12C:LTR:ERV1:+	0.202734
SVA_B:Other:Other:-	0.167493			L1PA2:LINE:L1:+	0.433333			LTR12C:LTR:ERV1:+	0.340193
SVA_C:Other:Other:-	0.724892			L1PA3:LINE:L1:+	0.463895			LTR12C:LTR:ERV1:-	0.641052
SVA_D:Other:Other:-	0.676792			L1PA5:LINE:L1:+	0.693231			LTR12C:LTR:ERV1:-	0.555556
SVA_D:Other:Other:+	0.202836			L1PA4:LINE:L1:-	0.529696			LTR12C:LTR:ERV1:-	0.631314
SVA_D:Other:Other:+	0.294141			L1PA3:LINE:L1:+	0.440079			LTR12C:LTR:ERV1:+	0.680421
SVA_B:Other:Other:-	0.169426			L1PA3:LINE:L1:+	0.248571			LTR12C:LTR:ERV1:+	0.570726
SVA_E:Other:Other:-	0.181984			L1PA4:LINE:L1:+	0.222222			LTR12C:LTR:ERV1:+	0.579893
SVA_C:Other:Other:+	0.505035			L1PA4:LINE:L1:+	0.66645			LTR12C:LTR:ERV1:+	0.671662
SVA_B:Other:Other:+	0.112169			L1PA4:LINE:L1:+	0.645503			LTR12C:LTR:ERV1:+	0.81978
SVA_A:Other:Other:+	0.729212			L1PA8:LINE:L1:-	0.258838			LTR12C:LTR:ERV1:+	0.430524
SVA_B:Other:Other:+	0.568617			L1PA7:LINE:L1:-	0.56704			LTR12C:LTR:ERV1:-	0.488248
SVA_D:Other:Other:-	0.235043			L1PA3:LINE:L1:+	0.767902			LTR12C:LTR:ERV1:+	0.444818
SVA_B:Other:Other:-	0.461022			L1PA3:LINE:L1:+	0.536888			LTR12C:LTR:ERV1:-	0.132315
SVA_B:Other:Other:-	0.637851			L1PA7:LINE:L1:+	0.316128			LTR12C:LTR:ERV1:-	0.385042
SVA_D:Other:Other:+	0.1963			L1PA3:LINE:L1:+	0.731532			LTR12C:LTR:ERV1:-	0.733254
SVA_D:Other:Other:-	0.135022			L1PA7:LINE:L1:-	0.503393			LTR12C:LTR:ERV1:+	0.124948
SVA_F:Other:Other:+	0.00308642			L1PA4:LINE:L1:+	0.618929			LTR12C:LTR:ERV1:-	0.50184
SVA_C:Other:Other:-	0.0584795			L1PA7:LINE:L1:-	0.191342			LTR12C:LTR:ERV1:+	0.312203
SVA_B:Other:Other:+	0.244608			L1PA7:LINE:L1:-	0.433668			LTR12D:LTR:ERV1:-	0
SVA_D:Other:Other:+	0.102912			L1PA5:LINE:L1:+	0.594444			LTR12C:LTR:ERV1:+	0.728184
SVA_C:Other:Other:-	0.0761905			L1PA3:LINE:L1:-	0.645022			LTR12C:LTR:ERV1:+	0.801787
SVA_D:Other:Other:-	0.136766			L1PA5:LINE:L1:-	0.620196			LTR12C:LTR:ERV1:-	0.81273
SVA_D:Other:Other:-	0.0698413			L1PA4:LINE:L1:-	0.652296			LTR12C:LTR:ERV1:+	0.881006
SVA_A:Other:Other:+	0.601152			L1PA5:LINE:L1:-	0.515111			LTR12C:LTR:ERV1:-	0.336663
SVA_B:Other:Other:+	0.546067			L1PA5:LINE:L1:-	0.723095			LTR12C:LTR:ERV1:+	0.601634
SVA_D:Other:Other:-	0.0798128			L1PA4:LINE:L1:-	0.551786			LTR12C:LTR:ERV1:-	0.174389
SVA_D:Other:Other:+	0.0766213			L1PA4:LINE:L1:+	0.595797			LTR12C:LTR:ERV1:-	0.08
SVA_C:Other:Other:+	0.348401			L1PA4:LINE:L1:-	0.780592			LTR12C:LTR:ERV1:+	0.735791
SVA_C:Other:Other:+	0.0427767			L1PB1:LINE:L1:+	0.209862			LTR12C:LTR:ERV1:+	0.558964
SVA_D:Other:Other:+	0.0583333			L1PA6:LINE:L1:+	0.458324			LTR12C:LTR:ERV1:-	0.839484
SVA_D:Other:Other:+	0.0815986			L1PA2:LINE:L1:-	0.662755			LTR12C:LTR:ERV1:+	0.529599
SVA_A:Other:Other:-	0.739129			L1PA5:LINE:L1:-	0.46623			LTR12C:LTR:ERV1:+	0.733918
SVA_F:Other:Other:+	0.197017			L1PA4:LINE:L1:+	0.595041			LTR12E:LTR:ERV1:+	0.155
SVA_F:Other:Other:-	0.114576			L1PA4:LINE:L1:-	0.585213			LTR12C:LTR:ERV1:-	0.493197
SVA_D:Other:Other:+	0.337946			L1PA3:LINE:L1:+	0.440751			LTR12C:LTR:ERV1:-	0.0622222
SVA_B:Other:Other:+	0.0165945			L1PA3:LINE:L1:+	0.461905			LTR12C:LTR:ERV1:-	0.810963
SVA_D:Other:Other:+	0.0566709			L1PA4:LINE:L1:+	0.55007			LTR12C:LTR:ERV1:+	0.570985
SVA_D:Other:Other:-	0.0404971			L1PA4:LINE:L1:+	0.461895			LTR12C:LTR:ERV1:-	0.182717
SVA_B:Other:Other:-	0.246268			L1PA3:LINE:L1:-	0.709051			LTR12C:LTR:ERV1:+	0.652201
SVA_C:Other:Other:+	0.480677			L1PA5:LINE:L1:-	0.760825			LTR12C:LTR:ERV1:+	0.49006
SVA_D:Other:Other:+	0.0950476			L1PA7:LINE:L1:+	0.268333			LTR12C:LTR:ERV1:+	0.638863
SVA_B:Other:Other:+	0.025			L1PA5:LINE:L1:-	0.597962			LTR12C:LTR:ERV1:+	0.641112
SVA_D:Other:Other:+	0.106012			L1PA4:LINE:L1:+	0.488484			LTR12C:LTR:ERV1:+	0.790238
SVA_D:Other:Other:+	0.114167			L1PA5:LINE:L1:+	0.415901			LTR12C:LTR:ERV1:-	0.366104
SVA_F:Other:Other:+	0.681719			L1PA5:LINE:L1:+	0.532647			LTR12C:LTR:ERV1:-	0.693197
SVA_B:Other:Other:-	0.0580247			L1PA6:LINE:L1:-	0.698743			LTR12C:LTR:ERV1:-	0.0503968
SVA_A:Other:Other:-	0.34619			L1PA4:LINE:L1:+	0.638581			LTR12C:LTR:ERV1:-	0.515909
SVA_D:Other:Other:+	0.25034			L1PA4:LINE:L1:-	0.460724			LTR12C:LTR:ERV1:-	0.0267857
SVA_A:Other:Other:+	0.665853			L1PA4:LINE:L1:+	0.524579			LTR12C:LTR:ERV1:+	0.0065
SVA_D:Other:Other:+	0.153163			L1PA2:LINE:L1:-	0.561111			LTR12C:LTR:ERV1:-	0.11046
SVA_A:Other:Other:+	0.682263			L1PA2:LINE:L1:+	0.432385			LTR12C:LTR:ERV1:+	0.37561
SVA_B:Other:Other:-	0.60256			L1PA5:LINE:L1:-	0.624351			LTR12C:LTR:ERV1:-	0.798013
SVA_A:Other:Other:-	0.721664			L1PA2:LINE:L1:-	0.631746			LTR12C:LTR:ERV1:+	0.780319
SVA_A:Other:Other:+	0.471613			L1PA5:LINE:L1:+	0.714103			LTR12C:LTR:ERV1:-	0.784301
SVA_B:Other:Other:-	0.203458			L1PA5:LINE:L1:+	0.459286			LTR12C:LTR:ERV1:+	0.254134
SVA_D:Other:Other:-	0.225397			L1PA4:LINE:L1:+	0.700664			LTR12C:LTR:ERV1:+	0.289906
SVA_C:Other:Other:-	0			L1PA4:LINE:L1:-	0.531944			LTR12C:LTR:ERV1:-	0.0813492
SVA_D:Other:Other:-	0.0707757			L1PA3:LINE:L1:-	0.116296			LTR12C:LTR:ERV1:+	0.254555
SVA_B:Other:Other:-	0.246567			L1PA4:LINE:L1:+	0.546409			LTR12C:LTR:ERV1:+	0.513212
SVA_D:Other:Other:+	0.105017			L1PA5:LINE:L1:+	0.622078			LTR12C:LTR:ERV1:-	0.0664065
SVA_D:Other:Other:+	0.128747			L1PA3:LINE:L1:-	0.5663			LTR12C:LTR:ERV1:+	0.369223
SVA_D:Other:Other:+	0.0558191			L1PA4:LINE:L1:-	0.578147			LTR12C:LTR:ERV1:+	0.595285
SVA_D:Other:Other:-	0.0339027			L1PA4:LINE:L1:+	0.686618			LTR12C:LTR:ERV1:-	0.00950656
SVA_C:Other:Other:+	0.0132488			L1PA5:LINE:L1:+	0.505432			LTR12C:LTR:ERV1:-	0.0611111
SVA_F:Other:Other:-	0.0263736			L1PA4:LINE:L1:+	0.559008			LTR12C:LTR:ERV1:+	0.479121
SVA_D:Other:Other:-	0.398733			L1PA3:LINE:L1:+	0.505901			LTR12C:LTR:ERV1:+	0.485328
SVA_D:Other:Other:+	0.45212			L1PA6:LINE:L1:+	0.123269			LTR12D:LTR:ERV1:+	0.236491
SVA_D:Other:Other:+	0.107982			L1PA3:LINE:L1:-	0.0277778			LTR12D:LTR:ERV1:+	0.0333333
SVA_D:Other:Other:+	0.0783958			L1PA4:LINE:L1:+	0.560516			LTR12C:LTR:ERV1:-	0.691877
SVA_B:Other:Other:+	0.64837			L1PA4:LINE:L1:+	0.771995			LTR12C:LTR:ERV1:-	0.0561005
SVA_D:Other:Other:+	0.100752			L1PA3:LINE:L1:-	0.687185			LTR12C:LTR:ERV1:+	0.479497
SVA_C:Other:Other:-	0.196508			L1PA5:LINE:L1:+	0.374208			LTR12C:LTR:ERV1:-	0.85119
SVA_C:Other:Other:-	0.254935			L1PA6:LINE:L1:+	0.471807			LTR12C:LTR:ERV1:+	0.669021
SVA_B:Other:Other:+	0.145095			L1PA7:LINE:L1:+	0.0801421			LTR12C:LTR:ERV1:+	0.0392157
SVA_A:Other:Other:+	0.722842			L1PA3:LINE:L1:-	0.797143			LTR12C:LTR:ERV1:+	0.505782
SVA_D:Other:Other:-	0.0439815			L1PA7:LINE:L1:+	0.322902			LTR12:LTR:ERV1:+	0.655769
SVA_D:Other:Other:+	0.05625			L1PA3:LINE:L1:-	0.70112			LTR12C:LTR:ERV1:+	0.228857
SVA_C:Other:Other:-	0.130952			L1PA3:LINE:L1:-	0.535351			LTR12C:LTR:ERV1:+	0.236111
SVA_B:Other:Other:-	0.356277			L1PA5:LINE:L1:-	0.526786			LTR12D:LTR:ERV1:+	0.0982842
SVA_F:Other:Other:+	0.573864			L1PREC2:LINE:L1:+	0.504071			LTR12C:LTR:ERV1:+	0.451488
SVA_B:Other:Other:-	0.640729			L1PA3:LINE:L1:-	0.287132			LTR12C:LTR:ERV1:-	0.343442
SVA_C:Other:Other:+	0.423214			L1PA3:LINE:L1:+	0.513042			LTR12C:LTR:ERV1:-	0.150526
SVA_B:Other:Other:+	0.156349			L1PA6:LINE:L1:+	0.507167			LTR12C:LTR:ERV1:+	0.535626
SVA_D:Other:Other:-	0			L1PA3:LINE:L1:+	0.440554			LTR12C:LTR:ERV1:-	0
SVA_B:Other:Other:+	0.667657			L1PA7:LINE:L1:+	0.363203			LTR12C:LTR:ERV1:-	0.727988
SVA_C:Other:Other:-	0.35381			L1PA8A:LINE:L1:+	0.189103			LTR12C:LTR:ERV1:-	0.406934
SVA_D:Other:Other:+	0.49482			L1PA6:LINE:L1:+	0.367735			LTR12C:LTR:ERV1:+	0.464135
SVA_B:Other:Other:+	0.44248			L1PA2:LINE:L1:-	0.137879			LTR12D:LTR:ERV1:+	0.418713
SVA_E:Other:Other:+	0.84229			L1PA3:LINE:L1:-	0.741723			LTR12C:LTR:ERV1:+	0.480903
SVA_B:Other:Other:-	0.0559524			L1PA6:LINE:L1:+	0.246006			LTR12D:LTR:ERV1:+	0.707937
SVA_B:Other:Other:+	0.301677			L1PA5:LINE:L1:-	0.484402			LTR12C:LTR:ERV1:+	0.01
SVA_A:Other:Other:-	0.716255			L1PA6:LINE:L1:+	0.643623			LTR12C:LTR:ERV1:+	0.744921
SVA_D:Other:Other:+	0.0111111			L1PA7:LINE:L1:+	0.577205			LTR12D:LTR:ERV1:+	0.734155
SVA_D:Other:Other:-	0.022619			L1HS:LINE:L1:+	0.785506			LTR12D:LTR:ERV1:+	0.438196
SVA_D:Other:Other:-	0.177466			L1PA4:LINE:L1:-	0.691349			LTR12C:LTR:ERV1:+	0.493273
SVA_B:Other:Other:+	0.126667			L1PA3:LINE:L1:-	0.472495			LTR12C:LTR:ERV1:+	0.572066
SVA_B:Other:Other:+	0.59636			L1PA8:LINE:L1:+	0.359766			LTR12C:LTR:ERV1:+	0.453582
SVA_C:Other:Other:-	0.161905			L1PA5:LINE:L1:-	0.529365			LTR12C:LTR:ERV1:+	0.251984
SVA_D:Other:Other:-	0.0371032			L1PA4:LINE:L1:-	0.551443			LTR12D:LTR:ERV1:+	0.465513
SVA_A:Other:Other:-	0.670952			L1PA4:LINE:L1:+	0.641822			LTR12C:LTR:ERV1:-	0.0616162
SVA_D:Other:Other:-	0.0181973			L1PA2:LINE:L1:+	0.449915			LTR12C:LTR:ERV1:+	0.724749
SVA_D:Other:Other:+	0.663988			L1PA4:LINE:L1:-	0.509722			LTR12C:LTR:ERV1:-	0.22024
SVA_B:Other:Other:-	0.46246			L1PA4:LINE:L1:+	0.656037			LTR12C:LTR:ERV1:+	0.0962858
SVA_D:Other:Other:+	0.0973085			L1PA4:LINE:L1:+	0.708816			LTR12C:LTR:ERV1:+	0.116412
SVA_B:Other:Other:+	0.083908			L1PA5:LINE:L1:-	0.432857			LTR12C:LTR:ERV1:+	0.190338
SVA_D:Other:Other:+	0.02			L1PA6:LINE:L1:-	0.102551			LTR12C:LTR:ERV1:-	0.101642
SVA_C:Other:Other:+	0.44566			L1PA2:LINE:L1:-	0.212202			LTR12C:LTR:ERV1:+	0.84003
SVA_B:Other:Other:-	0.0769841			L1PA4:LINE:L1:+	0.742046			LTR12C:LTR:ERV1:-	0.0814815
SVA_D:Other:Other:+	0.0181818			L1PA3:LINE:L1:+	0.65547			LTR12C:LTR:ERV1:-	0.305052
SVA_D:Other:Other:+	0.0172043			L1PA5:LINE:L1:+	0.303336			LTR12C:LTR:ERV1:-	0.719896
SVA_B:Other:Other:-	0.211844			L1PB4:LINE:L1:-	0.748571			LTR12C:LTR:ERV1:+	0.525595
SVA_D:Other:Other:+	0.447985			L1PA5:LINE:L1:+	0.592275			LTR12C:LTR:ERV1:-	0.339752
SVA_F:Other:Other:-	0.289916			L1PA8:LINE:L1:+	0.433733			LTR12C:LTR:ERV1:+	0.343377
SVA_B:Other:Other:-	0.0515873			L1PA6:LINE:L1:+	0.644671			LTR12C:LTR:ERV1:+	0.0677083
SVA_C:Other:Other:+	0.391174			L1PA5:LINE:L1:-	0.446886			LTR12C:LTR:ERV1:+	0.0354575
SVA_D:Other:Other:-	0.180011			L1PA6:LINE:L1:-	0.0757576			LTR12C:LTR:ERV1:-	0.768552
SVA_D:Other:Other:+	0.0253205			L1PA6:LINE:L1:+	0.229841			LTR12C:LTR:ERV1:-	0.874206
SVA_B:Other:Other:-	0.311802			L1PA4:LINE:L1:+	0.640952			LTR12C:LTR:ERV1:-	0.724115
SVA_D:Other:Other:-	0.587619			L1PA6:LINE:L1:+	0.261905			LTR12C:LTR:ERV1:+	0.782143
SVA_C:Other:Other:+	0.816546			L1PA3:LINE:L1:-	0.40303			LTR12D:LTR:ERV1:+	0.107143
SVA_F:Other:Other:-	0.178992			L1PA6:LINE:L1:+	0.194643			LTR12C:LTR:ERV1:-	0.534127
SVA_B:Other:Other:+	0.0913364			L1PA2:LINE:L1:-	0.025641			LTR12C:LTR:ERV1:+	0.173006
SVA_D:Other:Other:+	0.0465686			L1PA7:LINE:L1:+	0.283816			LTR12C:LTR:ERV1:-	0.924711
SVA_B:Other:Other:-	0.0293333			L1PA4:LINE:L1:+	0.45268			LTR12:LTR:ERV1:+	0.617496
SVA_B:Other:Other:-	0.543846			L1PA5:LINE:L1:+	0.190965			LTR12C:LTR:ERV1:+	0.396202
SVA_A:Other:Other:-	0.738086			L1PA5:LINE:L1:+	0.509848			LTR12C:LTR:ERV1:+	0.605226
SVA_B:Other:Other:+	0.0462727			L1PA4:LINE:L1:-	0.726935			LTR12C:LTR:ERV1:+	0.333058
SVA_C:Other:Other:+	0.305146			L1PA6:LINE:L1:+	0.532698			LTR12_:LTR:ERV1:+	0.164286
SVA_D:Other:Other:+	0.494208			L1PA4:LINE:L1:-	0.591667			LTR12C:LTR:ERV1:-	0.805457
SVA_D:Other:Other:+	0.288244			L1PA5:LINE:L1:+	0.514815			LTR12C:LTR:ERV1:+	0.633862
SVA_A:Other:Other:+	0.472673			L1PA4:LINE:L1:-	0.771123			LTR12C:LTR:ERV1:+	0.114478
SVA_A:Other:Other:+	0.300079			L1PA2:LINE:L1:-	0.3575			LTR12C:LTR:ERV1:+	0.747193
SVA_B:Other:Other:-	0.548404			L1PA6:LINE:L1:-	0.378819			LTR12C:LTR:ERV1:+	0.252711
SVA_D:Other:Other:-	0.0988473			L1PA3:LINE:L1:+	0.793765			LTR12C:LTR:ERV1:+	0.767049
SVA_D:Other:Other:+	0.213075			L1PA5:LINE:L1:-	0.711844			LTR12C:LTR:ERV1:+	0.0614943
SVA_D:Other:Other:-	0.0969697			L1PA4:LINE:L1:+	0.642826			LTR12C:LTR:ERV1:+	0.539098
SVA_D:Other:Other:+	0.401584			L1PA5:LINE:L1:+	0.505578			LTR12D:LTR:ERV1:-	0.285714
SVA_D:Other:Other:+	0.199415			L1PA5:LINE:L1:-	0.588095			LTR12C:LTR:ERV1:+	0.719838
SVA_C:Other:Other:+	0.152587			L1PA2:LINE:L1:+	0.587302			LTR12C:LTR:ERV1:+	0.510184
SVA_B:Other:Other:+	0.112681			L1PA4:LINE:L1:+	0.588624			LTR12C:LTR:ERV1:-	0.760621
SVA_A:Other:Other:+	0.756318			L1PA2:LINE:L1:+	0.646533			LTR12C:LTR:ERV1:-	0.357113
SVA_D:Other:Other:+	0			L1PA6:LINE:L1:-	0.420055			LTR12D:LTR:ERV1:-	0.636171
SVA_B:Other:Other:+	0.317493			L1PA2:LINE:L1:-	0.343095			LTR12C:LTR:ERV1:-	0.450921
SVA_A:Other:Other:-	0.443452			L1PA3:LINE:L1:+	0.675163			LTR12C:LTR:ERV1:+	0.548946
SVA_E:Other:Other:+	0.436807			L1PA5:LINE:L1:-	0.446528			LTR12D:LTR:ERV1:-	0.0518162
SVA_D:Other:Other:+	0.195977			L1PA5:LINE:L1:+	0.57013			LTR12C:LTR:ERV1:+	0.870535
SVA_D:Other:Other:+	0.18403			L1PA4:LINE:L1:-	0.378571			LTR12D:LTR:ERV1:+	0.393761
SVA_D:Other:Other:-	0.227513			L1PA8:LINE:L1:+	0.116667			LTR12C:LTR:ERV1:+	0.216511
SVA_D:Other:Other:-	0.0355638			L1PA5:LINE:L1:-	0.522222			LTR12C:LTR:ERV1:+	0.708986
SVA_D:Other:Other:+	0.0710896			L1PA8:LINE:L1:-	0.45			LTR12C:LTR:ERV1:+	0.0810486
SVA_B:Other:Other:-	0.311835			L1PA5:LINE:L1:+	0.381573			LTR12C:LTR:ERV1:+	0.67323
SVA_C:Other:Other:-	0.2375			L1PA4:LINE:L1:+	0.513542			LTR12C:LTR:ERV1:+	0.70633
SVA_D:Other:Other:-	0.157814			L1PA2:LINE:L1:+	0.310823			LTR12C:LTR:ERV1:+	0.0831349
SVA_B:Other:Other:-	0.0142857			L1PA3:LINE:L1:+	0.218768			LTR12C:LTR:ERV1:-	0.603434
SVA_B:Other:Other:-	0.234949			L1PA5:LINE:L1:-	0.0595238			LTR12C:LTR:ERV1:+	0.227036
SVA_C:Other:Other:-	0			L1PA3:LINE:L1:-	0.807496			LTR12C:LTR:ERV1:-	0.190048
SVA_B:Other:Other:+	0.0911866			L1PA7:LINE:L1:-	0.0833333			LTR12C:LTR:ERV1:-	0.281836
SVA_D:Other:Other:+	0.0470506			L1HS:LINE:L1:-	0.255			LTR12C:LTR:ERV1:+	0.725346
SVA_D:Other:Other:-	0.463216			L1PA3:LINE:L1:+	0.552561			LTR12C:LTR:ERV1:+	0.203869
SVA_D:Other:Other:+	0.0135802			L1PA4:LINE:L1:+	0.562121			LTR12C:LTR:ERV1:-	0.0349794
SVA_D:Other:Other:+	0.0607474			L1PA5:LINE:L1:-	0.260565			LTR12C:LTR:ERV1:+	0.0337542
SVA_D:Other:Other:-	0.145615			L1PA5:LINE:L1:+	0.589683			LTR12E:LTR:ERV1:-	0.0487343
SVA_D:Other:Other:+	0.0850459			L1PA6:LINE:L1:+	0.135897			LTR12C:LTR:ERV1:-	0.174805
SVA_C:Other:Other:+	0.133252			L1PA5:LINE:L1:-	0.596465			LTR12C:LTR:ERV1:-	0.661408
SVA_F:Other:Other:+	0.0306471			L1PA3:LINE:L1:+	0.314286			LTR12E:LTR:ERV1:-	0.167521
SVA_C:Other:Other:+	0.0481074			L1PA5:LINE:L1:-	0.593333			LTR12C:LTR:ERV1:+	0.0879252
SVA_D:Other:Other:+	0.108376			L1PA3:LINE:L1:-	0.61375			LTR12C:LTR:ERV1:+	0.4375
SVA_D:Other:Other:-	0.189312			L1PA3:LINE:L1:+	0.52967			LTR12D:LTR:ERV1:+	0.463627
SVA_C:Other:Other:+	0.587374			L1PA2:LINE:L1:+	0.144048			LTR12C:LTR:ERV1:-	0.356515
SVA_D:Other:Other:-	0.0461538			L1PA8:LINE:L1:-	0.123413			LTR12C:LTR:ERV1:-	0.758157
SVA_D:Other:Other:-	0.0185185			L1PA4:LINE:L1:-	0.471825			LTR12E:LTR:ERV1:-	0.698532
SVA_C:Other:Other:-	0.227111			L1PA7:LINE:L1:-	0.0714286			LTR12C:LTR:ERV1:+	0.221706
SVA_F:Other:Other:+	0.0870748			L1PA3:LINE:L1:+	0.542424			LTR12C:LTR:ERV1:-	0.197143
SVA_D:Other:Other:-	0.063933			L1PA6:LINE:L1:-	0.578333			LTR12C:LTR:ERV1:+	0.134934
SVA_B:Other:Other:+	0.0143624			L1PA4:LINE:L1:-	0.659184			LTR12C:LTR:ERV1:-	0.373086
SVA_D:Other:Other:-	0.0785248			L1PA3:LINE:L1:+	0.367619			LTR12C:LTR:ERV1:+	0.0615385
SVA_D:Other:Other:+	0.33291			L1PA5:LINE:L1:-	0.744581			LTR12C:LTR:ERV1:-	0.187934
SVA_B:Other:Other:-	0.139599			L1PA4:LINE:L1:+	0.384683			LTR12C:LTR:ERV1:-	0.395635
SVA_B:Other:Other:-	0.32409			L1PA2:LINE:L1:-	0.223636			LTR12C:LTR:ERV1:-	0.596897
SVA_D:Other:Other:-	0.564205			L1PA7:LINE:L1:+	0.409127			LTR12C:LTR:ERV1:+	0
SVA_A:Other:Other:+	0.610684			L1PA2:LINE:L1:+	0.0895833			LTR12C:LTR:ERV1:-	0.0921296
SVA_F:Other:Other:+	0.340976			L1PA3:LINE:L1:-	0.44127			LTR12C:LTR:ERV1:+	0.491071
SVA_F:Other:Other:+	0.502857			L1PA6:LINE:L1:+	0.535698			LTR12C:LTR:ERV1:-	0.201701
SVA_B:Other:Other:+	0.671009			L1PA3:LINE:L1:-	0.74246			LTR12C:LTR:ERV1:+	0.373193
SVA_B:Other:Other:+	0.439768			L1PA7:LINE:L1:-	0.0830499			LTR12C:LTR:ERV1:-	0.365488
SVA_C:Other:Other:+	0.0398671			L1PA6:LINE:L1:-	0.734757			LTR12C:LTR:ERV1:+	0.395158
SVA_F:Other:Other:-	0.074256			L1PB1:LINE:L1:+	0.113636			LTR12D:LTR:ERV1:+	0.764583
SVA_D:Other:Other:+	0.025641			L1PA2:LINE:L1:+	0			LTR12C:LTR:ERV1:+	0.551409
SVA_D:Other:Other:-	0.0295455			L1PA4:LINE:L1:-	0.514171			LTR12C:LTR:ERV1:+	0.496503
SVA_C:Other:Other:-	0.0336111			L1PA3:LINE:L1:-	0.204656			LTR12C:LTR:ERV1:-	0.708023
SVA_B:Other:Other:+	0			L1PA7:LINE:L1:-	0.105833			LTR12E:LTR:ERV1:+	0.304401
SVA_D:Other:Other:+	0.0943947			L1PA5:LINE:L1:-	0.381385			LTR12C:LTR:ERV1:+	0.564621
SVA_D:Other:Other:+	0.248086			L1PA7:LINE:L1:+	0.24359			LTR12C:LTR:ERV1:+	0.678781
SVA_A:Other:Other:-	0.641534			L1PA2:LINE:L1:-	0.01			LTR12C:LTR:ERV1:+	0.463942
SVA_B:Other:Other:-	0.406495			L1PA6:LINE:L1:+	0.339966			LTR12C:LTR:ERV1:+	0.67728
SVA_B:Other:Other:+	0.361141			L1PA2:LINE:L1:+	0.2			LTR12C:LTR:ERV1:-	0.884446
SVA_D:Other:Other:-	0.0226667			L1PA4:LINE:L1:+	0.688366			LTR12C:LTR:ERV1:+	0.183908
SVA_B:Other:Other:-	0.0833333			L1PA2:LINE:L1:+	0.629167			LTR12C:LTR:ERV1:+	0.465696
SVA_D:Other:Other:+	0.255539			L1PA2:LINE:L1:+	0.532804			LTR12C:LTR:ERV1:+	0.304084
SVA_C:Other:Other:-	0.577559			L1PA4:LINE:L1:-	0.448241			LTR12C:LTR:ERV1:+	0.475582
SVA_F:Other:Other:+	0.0517108			L1PA6:LINE:L1:+	0.481241			LTR12C:LTR:ERV1:-	0.771645
SVA_C:Other:Other:+	0.0612877			L1PA4:LINE:L1:-	0.597917			LTR12C:LTR:ERV1:-	0.67786
SVA_B:Other:Other:+	0.34803			L1PA4:LINE:L1:-	0.636409			LTR12C:LTR:ERV1:+	0.435873
SVA_F:Other:Other:+	0.341683			L1PA4:LINE:L1:+	0.630769			LTR12C:LTR:ERV1:+	0.764011
SVA_D:Other:Other:-	0.031746			L1PA4:LINE:L1:+	0.553378			LTR12C:LTR:ERV1:+	0.788379
SVA_F:Other:Other:+	0.00925926			L1PA3:LINE:L1:+	0.424074			LTR12C:LTR:ERV1:-	0.194983
SVA_D:Other:Other:-	0.0949295			L1PA4:LINE:L1:-	0.496687			LTR12C:LTR:ERV1:+	0.758699
SVA_C:Other:Other:-	0.0533333			L1PA7:LINE:L1:-	0.578031			LTR12C:LTR:ERV1:+	0.47735
SVA_D:Other:Other:+	0.0208551			L1PA4:LINE:L1:-	0.580952			LTR12C:LTR:ERV1:-	0.00735294
SVA_D:Other:Other:-	0			L1PA2:LINE:L1:-	0.102239			LTR12C:LTR:ERV1:+	0.841942
SVA_C:Other:Other:+	0.110879			L1PA4:LINE:L1:-	0.792923			LTR12:LTR:ERV1:+	0.198523
SVA_F:Other:Other:-	0.706379			L1PA4:LINE:L1:+	0.554696			LTR12C:LTR:ERV1:+	0.778108
SVA_A:Other:Other:+	0.79223			L1PA3:LINE:L1:+	0.681956			LTR12C:LTR:ERV1:+	0.641797
SVA_D:Other:Other:+	0.0659279			L1PA2:LINE:L1:-	0.62563			LTR12D:LTR:ERV1:-	0.671878
SVA_C:Other:Other:+	0.218311			L1PA3:LINE:L1:-	0.152857			LTR12C:LTR:ERV1:+	0.205859
SVA_D:Other:Other:-	0.0323696			L1PA3:LINE:L1:+	0.502183			LTR12C:LTR:ERV1:-	0.647833
SVA_D:Other:Other:-	0.225475			L1PA3:LINE:L1:+	0.645952			LTR12C:LTR:ERV1:+	0.282051
SVA_D:Other:Other:-	0.0960181			L1PA3:LINE:L1:+	0.626702			LTR12C:LTR:ERV1:+	0.271429
SVA_B:Other:Other:+	0.0910476			L1PA4:LINE:L1:+	0.606227			LTR12D:LTR:ERV1:+	0.57326
SVA_D:Other:Other:-	0.0133333			L1PA3:LINE:L1:+	0.416587			LTR12C:LTR:ERV1:-	0.707143
SVA_C:Other:Other:-	0.0174603			L1PA6:LINE:L1:+	0.748656			LTR12C:LTR:ERV1:-	0.847977
SVA_D:Other:Other:-	0.769739			L1PA8:LINE:L1:-	0.336905			LTR12C:LTR:ERV1:-	0.0552381
SVA_B:Other:Other:+	0.124837			L1PA3:LINE:L1:-	0.831602			LTR12C:LTR:ERV1:-	0.0181052
SVA_D:Other:Other:+	0.195238			L1PA2:LINE:L1:+	0.731579			LTR12C:LTR:ERV1:-	0.827137
SVA_B:Other:Other:+	0.0267813			L1PB1:LINE:L1:-	0.055			LTR12C:LTR:ERV1:+	0.450097
SVA_B:Other:Other:+	0.406349			L1PA2:LINE:L1:+	0.536866			LTR12C:LTR:ERV1:-	0.577877
SVA_D:Other:Other:+	0.335863			L1HS:LINE:L1:+	0.283234			LTR12C:LTR:ERV1:+	0.123618
SVA_D:Other:Other:+	0.116377			L1PA6:LINE:L1:-	0.205983			LTR12C:LTR:ERV1:+	0.216938
SVA_D:Other:Other:-	0.531696			L1PA4:LINE:L1:-	0.661792			LTR12C:LTR:ERV1:+	0.574074
SVA_C:Other:Other:+	0.411477			L1PA3:LINE:L1:+	0.704127			LTR12C:LTR:ERV1:-	0.725189
SVA_D:Other:Other:+	0.196603			L1PA5:LINE:L1:+	0.422392			LTR12C:LTR:ERV1:+	0.400748
SVA_D:Other:Other:+	0.00252525			L1PA4:LINE:L1:-	0.657714			LTR12C:LTR:ERV1:-	0.600301
SVA_D:Other:Other:+	0.210822			L1PA5:LINE:L1:-	0.87295			LTR12C:LTR:ERV1:-	0.557517
SVA_F:Other:Other:-	0.315265			L1PA5:LINE:L1:+	0.618214			LTR12D:LTR:ERV1:-	0.169513
SVA_D:Other:Other:+	0.548329			L1PA4:LINE:L1:-	0.704365			LTR12C:LTR:ERV1:+	0.223293
SVA_D:Other:Other:+	0.0428819			L1PA4:LINE:L1:+	0.493003			LTR12C:LTR:ERV1:-	0.493803
SVA_D:Other:Other:-	0.109244			L1PA5:LINE:L1:+	0.48525			LTR12C:LTR:ERV1:+	0.755501
SVA_A:Other:Other:+	0.434895			L1PA6:LINE:L1:-	0.172712			LTR12C:LTR:ERV1:-	0.072619
SVA_C:Other:Other:+	0.179814			L1PA2:LINE:L1:-	0.271977			LTR12C:LTR:ERV1:+	0.24224
SVA_B:Other:Other:-	0.0477778			L1PA5:LINE:L1:-	0.56572			LTR12C:LTR:ERV1:-	0.69577
SVA_C:Other:Other:-	0.122789			L1PA7:LINE:L1:+	0.301032			LTR12C:LTR:ERV1:+	0.154365
SVA_C:Other:Other:-	0.254329			L1PA2:LINE:L1:-	0.560926			LTR12C:LTR:ERV1:-	0.415377
SVA_D:Other:Other:-	0			L1PA7:LINE:L1:+	0.258849			LTR12D:LTR:ERV1:-	0.566548
SVA_D:Other:Other:+	0.102857			L1PA4:LINE:L1:-	0.458889			LTR12C:LTR:ERV1:-	0.740063
SVA_D:Other:Other:-	0.189469			L1PA5:LINE:L1:+	0.634813			LTR12C:LTR:ERV1:-	0.8
SVA_D:Other:Other:+	0.108838			L1PA4:LINE:L1:+	0.638639			LTR12C:LTR:ERV1:+	0.264907
SVA_F:Other:Other:+	0.084127			L1PA4:LINE:L1:-	0.607851			LTR12C:LTR:ERV1:+	0.0377232
SVA_D:Other:Other:+	0.154053			L1PA6:LINE:L1:+	0.421825			LTR12C:LTR:ERV1:-	0.769928
SVA_B:Other:Other:-	0.0723104			L1PA7:LINE:L1:+	0.689316			LTR12C:LTR:ERV1:+	0.0371573
SVA_C:Other:Other:+	0.701784			L1PA4:LINE:L1:-	0.554078			LTR12C:LTR:ERV1:+	0.159386
SVA_C:Other:Other:+	0.309702			L1PA3:LINE:L1:+	0.611738			LTR12C:LTR:ERV1:-	0.7813
SVA_D:Other:Other:+	0.064599			L1PA5:LINE:L1:-	0.645476			LTR12C:LTR:ERV1:-	0.114108
SVA_D:Other:Other:-	0.47554			L1PA3:LINE:L1:+	0.79747			LTR12C:LTR:ERV1:-	0.112095
SVA_D:Other:Other:-	0.0215686			L1PA5:LINE:L1:+	0.462255			LTR12C:LTR:ERV1:-	0.798224
SVA_C:Other:Other:-	0.148783			L1PA5:LINE:L1:-	0.657381			LTR12C:LTR:ERV1:+	0.735666
SVA_C:Other:Other:-	0.451537			L1PA4:LINE:L1:+	0.595887			LTR12C:LTR:ERV1:+	0.290604
SVA_D:Other:Other:+	0.483853			L1PA6:LINE:L1:+	0.324504			LTR12C:LTR:ERV1:+	0.602178
SVA_A:Other:Other:+	0.652329			L1PA3:LINE:L1:+	0.569008			LTR12C:LTR:ERV1:-	0.412341
SVA_D:Other:Other:-	0.527062			L1PA3:LINE:L1:+	0.424359			LTR12C:LTR:ERV1:+	0.383227
SVA_C:Other:Other:-	0.448182			L1PA6:LINE:L1:-	0.143651			LTR12C:LTR:ERV1:+	0.851585
SVA_C:Other:Other:+	0.620178			L1PA3:LINE:L1:+	0.818847			LTR12C:LTR:ERV1:-	0.233587
SVA_D:Other:Other:+	0.0833333			L1PA8:LINE:L1:+	0.210491			LTR12C:LTR:ERV1:+	0.758806
SVA_D:Other:Other:+	0.0464646			L1PA4:LINE:L1:-	0.739888			LTR12C:LTR:ERV1:+	0.337385
SVA_D:Other:Other:-	0.1			L1P1:LINE:L1:+	0.147759			LTR12C:LTR:ERV1:+	0.643797
SVA_D:Other:Other:+	0.142167			L1PA3:LINE:L1:-	0.588379			LTR12E:LTR:ERV1:-	0.675842
SVA_D:Other:Other:+	0.356143			L1PA5:LINE:L1:-	0.433929			LTR12C:LTR:ERV1:+	0.450559
SVA_D:Other:Other:-	0.00769231			L1PA7:LINE:L1:+	0.29871			LTR12C:LTR:ERV1:+	0.223654
SVA_D:Other:Other:-	0.0350694			L1PA8A:LINE:L1:+	0.0511905			LTR12C:LTR:ERV1:+	0.117575
SVA_B:Other:Other:+	0.633333			L1PA3:LINE:L1:+	0.396703			LTR12C:LTR:ERV1:-	0.83175
SVA_B:Other:Other:-	0.0550926			L1PA4:LINE:L1:-	0.788558			LTR12C:LTR:ERV1:+	0.13183
SVA_D:Other:Other:-	0.155758			L1PA4:LINE:L1:+	0.559127			LTR12C:LTR:ERV1:+	0.434325
SVA_A:Other:Other:+	0.624075			L1PA5:LINE:L1:-	0.611698			LTR12C:LTR:ERV1:+	0.741747
SVA_A:Other:Other:+	0.598093			L1PA3:LINE:L1:+	0.612469			LTR12D:LTR:ERV1:+	0.471746
SVA_D:Other:Other:+	0.10711			L1PA4:LINE:L1:+	0.572698			LTR12D:LTR:ERV1:+	0.631972
SVA_A:Other:Other:+	0.445322			L1PA2:LINE:L1:+	0.558862			LTR12C:LTR:ERV1:+	0.0440171
SVA_B:Other:Other:-	0.698457			L1PA6:LINE:L1:+	0.113872			LTR12C:LTR:ERV1:-	0.709638
SVA_C:Other:Other:-	0.911012			L1PA3:LINE:L1:-	0.74085			LTR12D:LTR:ERV1:+	0.454259
SVA_B:Other:Other:-	0.661964			L1PA4:LINE:L1:+	0.4087			LTR12C:LTR:ERV1:+	0.394252
SVA_B:Other:Other:-	0.0281955			L1PA3:LINE:L1:+	0.148485			LTR12C:LTR:ERV1:+	0.53131
SVA_D:Other:Other:-	0.0272727			L1PA3:LINE:L1:-	0.710276			LTR12C:LTR:ERV1:+	0.512843
SVA_C:Other:Other:+	0.126953			L1PA3:LINE:L1:+	0.479936			LTR12:LTR:ERV1:+	0.217946
SVA_B:Other:Other:+	0.00588235			L1PA3:LINE:L1:-	0.650035			LTR12C:LTR:ERV1:+	0.510471
SVA_D:Other:Other:-	0.0603175			L1PA7:LINE:L1:+	0.231905			LTR12D:LTR:ERV1:+	0.318269
SVA_D:Other:Other:-	0			L1PA6:LINE:L1:-	0.129437			LTR12C:LTR:ERV1:+	0.618267
SVA_C:Other:Other:+	0.0238706			L1PA6:LINE:L1:+	0.516443			LTR12C:LTR:ERV1:+	0.20734
SVA_D:Other:Other:+	0.045084			L1PA4:LINE:L1:+	0.405514			LTR12C:LTR:ERV1:+	0.773487
SVA_F:Other:Other:-	0.170635			L1PA3:LINE:L1:+	0.236797			LTR12C:LTR:ERV1:-	0.501074
SVA_D:Other:Other:-	0.30481			L1PA4:LINE:L1:+	0.581191			LTR12C:LTR:ERV1:+	0.563421
SVA_D:Other:Other:+	0.119195			L1PA5:LINE:L1:+	0.578496			LTR12C:LTR:ERV1:+	0.637363
SVA_B:Other:Other:+	0.349709			L1PA4:LINE:L1:+	0.583297			LTR12C:LTR:ERV1:+	0.720437
SVA_B:Other:Other:-	0.335017			L1PA4:LINE:L1:-	0.388095			LTR12C:LTR:ERV1:+	0.487067
SVA_B:Other:Other:+	0.112596			L1PA7:LINE:L1:+	0.118824			LTR12C:LTR:ERV1:-	0.130602
SVA_D:Other:Other:-	0.392969			L1PA5:LINE:L1:+	0.311305			LTR12C:LTR:ERV1:-	0.8013
SVA_A:Other:Other:-	0.165533			L1PA7:LINE:L1:-	0.133333			LTR12C:LTR:ERV1:+	0.710184
SVA_C:Other:Other:-	0.0755473			L1PA3:LINE:L1:-	0.128571			LTR12C:LTR:ERV1:+	0.682619
SVA_D:Other:Other:+	0.526491			L1PA3:LINE:L1:+	0.809966			LTR12C:LTR:ERV1:-	0.805329
SVA_D:Other:Other:-	0			L1PA4:LINE:L1:-	0.602364			LTR12C:LTR:ERV1:-	0.666566
SVA_F:Other:Other:+	0.0579976			L1PA7:LINE:L1:-	0.133433			LTR12C:LTR:ERV1:-	0.713486
SVA_A:Other:Other:+	0.0922399			L1PA4:LINE:L1:+	0.566288			LTR12C:LTR:ERV1:-	0.681902
SVA_D:Other:Other:-	0.0708333			L1PA7:LINE:L1:+	0.129545			LTR12C:LTR:ERV1:+	0.451737
SVA_D:Other:Other:-	0.0333333			L1PA3:LINE:L1:-	0.67267			LTR12C:LTR:ERV1:+	0.751991
SVA_B:Other:Other:+	0.575188			L1PA4:LINE:L1:-	0.613333			LTR12C:LTR:ERV1:+	0.792856
SVA_D:Other:Other:+	0.0644444			L1PA7:LINE:L1:-	0.373651			LTR12C:LTR:ERV1:-	0.241362
SVA_F:Other:Other:-	0.11391			L1PA5:LINE:L1:+	0.64873			LTR12C:LTR:ERV1:+	0.200824
SVA_D:Other:Other:-	0.398152			L1PA4:LINE:L1:+	0.423565			LTR12E:LTR:ERV1:-	0.625794
SVA_D:Other:Other:-	0.180247			L1PA8:LINE:L1:+	0.199634			LTR12E:LTR:ERV1:+	0.561777
SVA_D:Other:Other:-	0.39596			L1PA6:LINE:L1:+	0.574168			LTR12C:LTR:ERV1:-	0.704956
SVA_D:Other:Other:+	0.0378571			L1PA3:LINE:L1:-	0.471429			LTR12D:LTR:ERV1:+	0.450969
SVA_D:Other:Other:+	0.123274			L1PA3:LINE:L1:-	0.614935			LTR12C:LTR:ERV1:-	0.349123
SVA_D:Other:Other:+	0.774883			L1PA3:LINE:L1:+	0.472915			LTR12E:LTR:ERV1:-	0.0320988
SVA_B:Other:Other:-	0.225027			L1PA7:LINE:L1:-	0.505495			LTR12D:LTR:ERV1:-	0.565406
SVA_B:Other:Other:+	0.48124			L1PA4:LINE:L1:-	0.563095			LTR12C:LTR:ERV1:+	0.749339
SVA_D:Other:Other:+	0.124542			L1PA3:LINE:L1:+	0.468254			LTR12C:LTR:ERV1:+	0.671474
SVA_B:Other:Other:+	0.0318948			L1PA2:LINE:L1:+	0.158617			LTR12C:LTR:ERV1:-	0.440485
SVA_B:Other:Other:-	0.750752			L1PA8:LINE:L1:-	0.052381			LTR12C:LTR:ERV1:-	0.656755
SVA_D:Other:Other:-	0.426488			L1PA7:LINE:L1:+	0.454487			LTR12C:LTR:ERV1:+	0.64321
SVA_C:Other:Other:+	0.0726274			L1PA5:LINE:L1:-	0.301488			LTR12C:LTR:ERV1:+	0.586013
SVA_C:Other:Other:+	0.289995			L1PA3:LINE:L1:-	0.257143			LTR12C:LTR:ERV1:-	0.540707
SVA_C:Other:Other:+	0.129912			L1PA4:LINE:L1:-	0.688095			LTR12C:LTR:ERV1:-	0.028125
SVA_D:Other:Other:+	0.539228			L1PA3:LINE:L1:+	0.101687			LTR12C:LTR:ERV1:+	0.00320513
SVA_D:Other:Other:+	0.277733			L1PA7:LINE:L1:+	0.207792			LTR12C:LTR:ERV1:+	0.0690283
SVA_D:Other:Other:+	0.0460631			L1PA5:LINE:L1:-	0.736472			LTR12E:LTR:ERV1:+	0
SVA_B:Other:Other:+	0.314063			L1PA5:LINE:L1:+	0.655838			LTR12E:LTR:ERV1:+	0
SVA_B:Other:Other:+	0.11875			L1PA4:LINE:L1:+	0.584491			LTR12C:LTR:ERV1:+	0.0981398
SVA_B:Other:Other:-	0.446032			L1PA2:LINE:L1:+	0.238889			LTR12C:LTR:ERV1:+	0.00543478
SVA_B:Other:Other:+	0.24888			L1PA2:LINE:L1:+	0.365159			LTR12C:LTR:ERV1:-	0.566494
SVA_D:Other:Other:-	0.309176			L1PA4:LINE:L1:-	0.588689			LTR12C:LTR:ERV1:+	0.0471597
SVA_D:Other:Other:-	0.580714			L1PA2:LINE:L1:-	0.286392			LTR12C:LTR:ERV1:+	0
SVA_B:Other:Other:-	0.264855			L1PA7:LINE:L1:-	0.137619			LTR12C:LTR:ERV1:+	0.0525397
SVA_B:Other:Other:-	0.321622			L1PA6:LINE:L1:-	0.266162			LTR12C:LTR:ERV1:-	0.733785
SVA_A:Other:Other:+	0.217143			L1PA4:LINE:L1:+	0.510293			LTR12C:LTR:ERV1:-	0.130744
SVA_D:Other:Other:+	0.0125			L1PA6:LINE:L1:+	0.140625			LTR12C:LTR:ERV1:-	0.104198
SVA_B:Other:Other:+	0.554808			L1PA6:LINE:L1:+	0.663988			LTR12C:LTR:ERV1:-	0.02
SVA_D:Other:Other:-	0.133146			L1PA3:LINE:L1:+	0.598854			LTR12E:LTR:ERV1:-	0.0271003
SVA_B:Other:Other:-	0.0221778			L1PA3:LINE:L1:-	0.606006			LTR12C:LTR:ERV1:-	0.0443609
SVA_D:Other:Other:-	0.225463			L1PA3:LINE:L1:+	0.493948			LTR12C:LTR:ERV1:+	0.118849
SVA_B:Other:Other:+	0.404848			L1PA5:LINE:L1:-	0.515013			LTR12C:LTR:ERV1:+	0.0247024
SVA_D:Other:Other:+	0.069697			L1PA4:LINE:L1:+	0.624096			LTR12C:LTR:ERV1:+	0.0538244
SVA_D:Other:Other:+	0.0271605			L1HS:LINE:L1:+	0.498148			LTR12C:LTR:ERV1:+	0.378084
SVA_B:Other:Other:+	0.0107143			L1PA5:LINE:L1:+	0.56278			LTR12C:LTR:ERV1:+	0.352518
SVA_C:Other:Other:+	0.378752			L1PA4:LINE:L1:-	0.689276			LTR12C:LTR:ERV1:+	0.440742
SVA_B:Other:Other:+	0.114169			L1PA4:LINE:L1:-	0.593849			LTR12C:LTR:ERV1:+	0.129679
SVA_B:Other:Other:-	0.432884			L1PA3:LINE:L1:+	0.674841			LTR12C:LTR:ERV1:+	0.0388889
SVA_B:Other:Other:-	0.423257			L1PA3:LINE:L1:+	0.539866			LTR12C:LTR:ERV1:+	0.281446
SVA_D:Other:Other:+	0.296828			L1PA4:LINE:L1:-	0.529403			LTR12C:LTR:ERV1:-	0.0345679
SVA_B:Other:Other:+	0.0147059			L1PA5:LINE:L1:-	0.628175			LTR12:LTR:ERV1:+	0.387374
SVA_D:Other:Other:-	0.17			L1PA5:LINE:L1:+	0.651648			LTR12:LTR:ERV1:+	0.388624
SVA_D:Other:Other:-	0.550119			L1PA2:LINE:L1:+	0.616667			LTR12C:LTR:ERV1:+	0.581627
SVA_C:Other:Other:-	0.214038			L1PA3:LINE:L1:-	0.298162			LTR12C:LTR:ERV1:-	0.0398095
SVA_C:Other:Other:+	0.49053			L1PA3:LINE:L1:-	0.752071			LTR12C:LTR:ERV1:+	0.395591
SVA_B:Other:Other:+	0.654588			L1PA3:LINE:L1:+	0.314352			LTR12C:LTR:ERV1:+	0.226854
SVA_D:Other:Other:+	0.136905			L1PA3:LINE:L1:+	0.590997			LTR12C:LTR:ERV1:-	0.102311
SVA_B:Other:Other:-	0.0166667			L1PA5:LINE:L1:+	0.252976			LTR12C:LTR:ERV1:-	0.0543115
SVA_D:Other:Other:-	0.0435897			L1PA4:LINE:L1:-	0.751082			LTR12C:LTR:ERV1:+	0.0203704
SVA_D:Other:Other:+	0.570265			L1PA5:LINE:L1:-	0.546833			LTR12D:LTR:ERV1:-	0.0961905
SVA_D:Other:Other:-	0.121474			L1PA4:LINE:L1:+	0.54702			LTR12C:LTR:ERV1:+	0.00396825
SVA_D:Other:Other:+	0.59499			L1PA3:LINE:L1:-	0.813542			LTR12C:LTR:ERV1:+	0.0764871
SVA_D:Other:Other:-	0.263896			L1PA5:LINE:L1:-	0.716937			LTR12C:LTR:ERV1:+	0.154482
SVA_D:Other:Other:-	0.385805			L1PA6:LINE:L1:-	0.306481			LTR12C:LTR:ERV1:-	0
SVA_D:Other:Other:+	0.0530021			L1PA7:LINE:L1:+	0.0703463			LTR12C:LTR:ERV1:+	0.0377143
SVA_C:Other:Other:+	0.315513			L1PA2:LINE:L1:-	0.341429			LTR12C:LTR:ERV1:-	0.0680272
SVA_C:Other:Other:+	0.684295			L1PA4:LINE:L1:-	0.425238			LTR12C:LTR:ERV1:-	0.364217
SVA_B:Other:Other:-	0.426761			L1PA6:LINE:L1:+	0.486555			LTR12D:LTR:ERV1:+	0.236301
SVA_D:Other:Other:-	0.125037			L1PA2:LINE:L1:-	0.309323			LTR12C:LTR:ERV1:+	0.047619
SVA_B:Other:Other:-	0.21067			L1PA5:LINE:L1:+	0.330952			LTR12C:LTR:ERV1:+	0.401621
SVA_B:Other:Other:+	0.0587302			L1PA4:LINE:L1:+	0.459707			LTR12C:LTR:ERV1:+	0.00695733
SVA_D:Other:Other:-	0.222917			L1PA7:LINE:L1:+	0.286888			LTR12C:LTR:ERV1:+	0.0885417
SVA_D:Other:Other:+	0.472454			L1PA2:LINE:L1:-	0.715079			LTR12C:LTR:ERV1:+	0.0546296
SVA_B:Other:Other:-	0.278624			L1PA5:LINE:L1:-	0.747304			LTR12C:LTR:ERV1:+	0.156818
SVA_B:Other:Other:-	0.0142857			L1PA4:LINE:L1:+	0.551747			LTR12C:LTR:ERV1:-	0.175488
SVA_D:Other:Other:-	0.185931			L1PA6:LINE:L1:-	0.609967			LTR12C:LTR:ERV1:+	0.124065
SVA_D:Other:Other:-	0.564728			L1PA3:LINE:L1:+	0.502871			LTR12C:LTR:ERV1:-	0.679434
SVA_D:Other:Other:-	0.0825397			L1PA7:LINE:L1:-	0.166667			LTR12C:LTR:ERV1:-	0.843967
SVA_D:Other:Other:+	0.141939			L1PA4:LINE:L1:-	0.614286			LTR12C:LTR:ERV1:-	0.24254
SVA_D:Other:Other:-	0.475453			L1HS:LINE:L1:-	0.350549			LTR12C:LTR:ERV1:-	0.0280702
SVA_F:Other:Other:-	0.267937			L1PA2:LINE:L1:+	0.558234			LTR12C:LTR:ERV1:-	0.180556
SVA_D:Other:Other:+	0.0327485			L1PA4:LINE:L1:+	0.742857			LTR12:LTR:ERV1:+	0.138641
SVA_D:Other:Other:+	0.036525			L1PA5:LINE:L1:+	0.468622			LTR12C:LTR:ERV1:+	0.0310374
SVA_D:Other:Other:+	0.113598			L1PA4:LINE:L1:-	0.418707			LTR12:LTR:ERV1:-	0.652619
SVA_F:Other:Other:-	0.0964912			L1PA7:LINE:L1:+	0.575313			LTR12D:LTR:ERV1:-	0.0240567
SVA_D:Other:Other:-	0.320547			L1PA6:LINE:L1:+	0.265309			LTR12D:LTR:ERV1:+	0.0285714
SVA_B:Other:Other:+	0.230681			L1PA3:LINE:L1:+	0.42619			LTR12C:LTR:ERV1:+	0
SVA_D:Other:Other:+	0.00909091			L1PA5:LINE:L1:+	0.519733			LTR12C:LTR:ERV1:+	0.0702437
SVA_B:Other:Other:+	0.0552646			L1PA3:LINE:L1:-	0.652126			LTR12C:LTR:ERV1:-	0.102632
SVA_D:Other:Other:+	0.0997829			L1PA2:LINE:L1:-	0.240245			LTR12C:LTR:ERV1:-	0.0414079
SVA_E:Other:Other:+	0.114414			L1PA5:LINE:L1:-	0.17904			LTR12C:LTR:ERV1:-	0.0167411
SVA_D:Other:Other:-	0.26058			L1PA5:LINE:L1:-	0.588329			LTR12C:LTR:ERV1:+	0.0157297
SVA_D:Other:Other:-	0.196169			L1PA2:LINE:L1:-	0.574747			LTR12D:LTR:ERV1:+	0.709651
SVA_B:Other:Other:-	0.417766			L1PA3:LINE:L1:+	0.584524			LTR12C:LTR:ERV1:-	0.159993
SVA_D:Other:Other:-	0.623219			L1PA5:LINE:L1:+	0.416753			LTR12_:LTR:ERV1:+	0.0647186
SVA_D:Other:Other:+	0.401032			L1PA7:LINE:L1:+	0.111111			LTR12C:LTR:ERV1:+	0.0533333
SVA_B:Other:Other:+	0.376192			L1PA3:LINE:L1:+	0.356606			LTR12C:LTR:ERV1:+	0.56327
SVA_B:Other:Other:-	0.13574			L1PA4:LINE:L1:+	0.633649			LTR12C:LTR:ERV1:+	0.179121
SVA_D:Other:Other:+	0.0902898			L1PA6:LINE:L1:-	0.442839			LTR12C:LTR:ERV1:-	0.563441
SVA_B:Other:Other:-	0.0735821			L1PA3:LINE:L1:-	0.204927			LTR12C:LTR:ERV1:+	0.299055
SVA_B:Other:Other:-	0.763377			L1PA2:LINE:L1:-	0.288889			LTR12C:LTR:ERV1:+	0.290971
SVA_A:Other:Other:+	0.341796			L1PA7:LINE:L1:+	0.330303			LTR12C:LTR:ERV1:+	0.261905
SVA_C:Other:Other:+	0.0964594			L1PA3:LINE:L1:+	0.18502			LTR12C:LTR:ERV1:-	0.51666
SVA_D:Other:Other:-	0.0556713			L1PA7:LINE:L1:+	0.538254			LTR12C:LTR:ERV1:-	0
SVA_D:Other:Other:+	0.190873			L1PA7:LINE:L1:+	0.0418229			LTR12C:LTR:ERV1:+	0.478009
SVA_D:Other:Other:-	0			L1PA6:LINE:L1:+	0.147143			LTR12C:LTR:ERV1:-	0.649773
SVA_A:Other:Other:+	0.607533			L1P2:LINE:L1:+	0.271539			LTR12C:LTR:ERV1:-	0.127921
SVA_D:Other:Other:-	0.460187			L1PA4:LINE:L1:-	0.659829			LTR12C:LTR:ERV1:+	0.43288
SVA_B:Other:Other:-	0.166634			L1PA3:LINE:L1:+	0.609051			LTR12C:LTR:ERV1:-	0.0857143
SVA_D:Other:Other:+	0.294631			L1PA5:LINE:L1:-	0.494841			LTR12C:LTR:ERV1:-	0.0433983
SVA_D:Other:Other:-	0.169643			L1PA3:LINE:L1:-	0.684158			LTR12C:LTR:ERV1:-	0.227284
SVA_D:Other:Other:+	0.0596296			L1PA6:LINE:L1:+	0.477485			LTR12C:LTR:ERV1:+	0.0885299
SVA_C:Other:Other:+	0.0443798			L1PA3:LINE:L1:-	0.66553			LTR12C:LTR:ERV1:-	0.116812
SVA_A:Other:Other:+	0.181551			L1PA2:LINE:L1:+	0.170665			LTR12C:LTR:ERV1:-	0.00151976
SVA_F:Other:Other:-	0.252381			L1PA7:LINE:L1:-	0.0305556			LTR12E:LTR:ERV1:-	0.025
SVA_D:Other:Other:-	0.157143			L1PA3:LINE:L1:+	0.630714			LTR12C:LTR:ERV1:-	0.0818452
SVA_B:Other:Other:+	0.664377			L1PA4:LINE:L1:-	0.568254			LTR12C:LTR:ERV1:+	0.223333
SVA_D:Other:Other:-	0.22674			L1PA7:LINE:L1:-	0.279938			LTR12D:LTR:ERV1:+	0.253154
SVA_D:Other:Other:-	0.361667			L1PA4:LINE:L1:+	0.42123			LTR12C:LTR:ERV1:-	0.122015
SVA_D:Other:Other:-	0.0240575			L1PA4:LINE:L1:+	0.657971			LTR12C:LTR:ERV1:-	0.0509091
SVA_F:Other:Other:-	0.0207729			L1PA8:LINE:L1:-	0.509643			LTR12C:LTR:ERV1:+	0.138375
SVA_D:Other:Other:+	0.0363095			L1PA8:LINE:L1:+	0.519925			LTR12C:LTR:ERV1:+	0.493981
SVA_F:Other:Other:-	0.197279			L1PA5:LINE:L1:-	0.57684			LTR12C:LTR:ERV1:+	0.0846646
SVA_C:Other:Other:+	0.0732304			L1PA3:LINE:L1:+	0.388492			LTR12C:LTR:ERV1:+	0.0142857
SVA_B:Other:Other:+	0.366319			L1PA4:LINE:L1:-	0.422222			LTR12C:LTR:ERV1:+	0.524932
SVA_D:Other:Other:-	0.00833333			L1PA8A:LINE:L1:-	0.0964827			LTR12C:LTR:ERV1:-	0.0916667
SVA_B:Other:Other:-	0.269048			L1PA5:LINE:L1:+	0.324471			LTR12C:LTR:ERV1:+	0.66543
SVA_D:Other:Other:-	0.459968			L1PA3:LINE:L1:+	0.590351			LTR12C:LTR:ERV1:-	0.07526
SVA_B:Other:Other:+	0.325805			L1PA5:LINE:L1:+	0.472802			LTR12C:LTR:ERV1:+	0.330421
SVA_C:Other:Other:+	0.0785193			L1PA6:LINE:L1:-	0.385238			LTR12C:LTR:ERV1:-	0.348489
SVA_F:Other:Other:-	0.0949018			L1HS:LINE:L1:-	0.707692			LTR12C:LTR:ERV1:+	0.156933
SVA_B:Other:Other:+	0.0431373			L1PA3:LINE:L1:-	0.234746			LTR12D:LTR:ERV1:-	0.751303
SVA_D:Other:Other:-	0.0147392			L1PA2:LINE:L1:+	0.149206			LTR12C:LTR:ERV1:+	0.139082
SVA_D:Other:Other:-	0.0401786			L1PA5:LINE:L1:+	0.570346			LTR12C:LTR:ERV1:-	0.447116
SVA_D:Other:Other:-	0.165476			L1PA5:LINE:L1:+	0.486395			LTR12_:LTR:ERV1:+	0.511905
SVA_D:Other:Other:+	0.269525			L1PA5:LINE:L1:-	0.581944			LTR12C:LTR:ERV1:-	0.719745
SVA_D:Other:Other:+	0.559699			L1PA5:LINE:L1:-	0.54246			LTR12D:LTR:ERV1:+	0.0555556
SVA_B:Other:Other:-	0.272315			L1PA3:LINE:L1:+	0.518101			LTR12C:LTR:ERV1:+	0.0914683
SVA_B:Other:Other:-	0.35034			L1PA4:LINE:L1:+	0.703929			LTR12C:LTR:ERV1:-	0.0881481
SVA_F:Other:Other:+	0.0752698			L1PA7:LINE:L1:+	0.348091			LTR12C:LTR:ERV1:+	0.148333
SVA_D:Other:Other:-	0.0346955			L1PA4:LINE:L1:+	0.664534			LTR12C:LTR:ERV1:+	0.796506
SVA_D:Other:Other:+	0.191615			L1PA4:LINE:L1:-	0.529293			LTR12E:LTR:ERV1:-	0.932325
SVA_B:Other:Other:+	0.0659155			L1PA7:LINE:L1:+	0.084188			LTR12E:LTR:ERV1:-	0.411708
SVA_D:Other:Other:+	0.564912			L1PA4:LINE:L1:-	0.585714			LTR12C:LTR:ERV1:-	0.493857
SVA_D:Other:Other:-	0.130357			L1PA3:LINE:L1:+	0.575483			LTR12D:LTR:ERV1:+	0.431746
SVA_D:Other:Other:-	0.0770975			L1PA6:LINE:L1:+	0.453316			LTR12C:LTR:ERV1:+	0.723889
SVA_B:Other:Other:+	0.0154762			L1PA3:LINE:L1:+	0.122364			LTR12C:LTR:ERV1:-	0.618855
SVA_D:Other:Other:+	0.120345			L1PA5:LINE:L1:-	0.508333			LTR12C:LTR:ERV1:-	0.276935
SVA_D:Other:Other:-	0.318611			L1PA6:LINE:L1:-	0.693973			LTR12C:LTR:ERV1:+	0.300457
SVA_D:Other:Other:+	0.00884354			L1PA3:LINE:L1:-	0.736147			LTR12C:LTR:ERV1:+	0.703635
SVA_B:Other:Other:+	0.0834357			L1PA7:LINE:L1:+	0.356548			LTR12C:LTR:ERV1:-	0.382633
SVA_D:Other:Other:+	0.0424358			L1PA3:LINE:L1:+	0.297605			LTR12C:LTR:ERV1:-	0.520756
SVA_C:Other:Other:+	0.0416126			L1PA7:LINE:L1:+	0.1			LTR12C:LTR:ERV1:-	0.463302
SVA_D:Other:Other:+	0.0390888			L1PA5:LINE:L1:+	0.498319			LTR12C:LTR:ERV1:+	0.577723
SVA_D:Other:Other:+	0.205553			L1PA4:LINE:L1:-	0.535202			LTR12C:LTR:ERV1:+	0.567989
SVA_D:Other:Other:-	0.00416667			L1PA5:LINE:L1:-	0.684596			LTR12C:LTR:ERV1:+	0.450178
SVA_D:Other:Other:-	0.0395833			L1PA3:LINE:L1:-	0.725347			LTR12C:LTR:ERV1:-	0.70216
SVA_F:Other:Other:-	0.213033			L1PA7:LINE:L1:-	0.0842593			LTR12C:LTR:ERV1:+	0.193333
SVA_D:Other:Other:-	0.411387			L1PA5:LINE:L1:-	0.507222			LTR12C:LTR:ERV1:+	0.756838
SVA_D:Other:Other:+	0			L1PA5:LINE:L1:-	0.645221			LTR12C:LTR:ERV1:+	0.476912
SVA_D:Other:Other:-	0			L1PA3:LINE:L1:-	0.665714			LTR12C:LTR:ERV1:+	0.508709
SVA_D:Other:Other:+	0.0111111			L1PA3:LINE:L1:+	0.679232			LTR12C:LTR:ERV1:+	0.547356
SVA_D:Other:Other:+	0.0743229			L1PA4:LINE:L1:-	0.66862			LTR12C:LTR:ERV1:+	0.631737
SVA_B:Other:Other:+	0.0457451			L1PA3:LINE:L1:-	0.450781			LTR12C:LTR:ERV1:-	0.256001
SVA_F:Other:Other:+	0.0493254			L1PA3:LINE:L1:-	0.516106			LTR12C:LTR:ERV1:-	0.254879
SVA_D:Other:Other:+	0.27248			L1PA2:LINE:L1:+	0.66514			LTR12C:LTR:ERV1:-	0.430404
SVA_D:Other:Other:+	0.0854342			L1PA5:LINE:L1:-	0.551666			LTR12C:LTR:ERV1:+	0.151515
SVA_B:Other:Other:+	0.132642			L1PA3:LINE:L1:+	0.3			LTR12C:LTR:ERV1:-	0.744955
SVA_C:Other:Other:-	0.0525595			L1PA4:LINE:L1:+	0.483791			LTR12C:LTR:ERV1:+	0.246825
SVA_D:Other:Other:-	0.047805			L1PA7:LINE:L1:-	0.188095			LTR12C:LTR:ERV1:+	0.663616
SVA_C:Other:Other:+	0.0826389			L1PA5:LINE:L1:-	0.468024			LTR12C:LTR:ERV1:+	0.0898352
SVA_D:Other:Other:+	0.0761549			L1PA3:LINE:L1:+	0.229338			LTR12C:LTR:ERV1:-	0.786769
SVA_D:Other:Other:+	0.068086			L1PA2:LINE:L1:+	0.416667			LTR12C:LTR:ERV1:+	0.0737619
SVA_A:Other:Other:+	0.35907			L1PA7:LINE:L1:+	0.608333			LTR12C:LTR:ERV1:-	0.750681
SVA_B:Other:Other:+	0.140912			L1PA5:LINE:L1:+	0.282857			LTR12C:LTR:ERV1:-	0.705772
SVA_B:Other:Other:+	0.0585498			L1PA4:LINE:L1:-	0.624812			LTR12C:LTR:ERV1:+	0.134921
SVA_D:Other:Other:+	0.192929			L1PA4:LINE:L1:+	0.61703			LTR12C:LTR:ERV1:+	0.477778
SVA_D:Other:Other:+	0.653316			L1P2:LINE:L1:+	0.382976			LTR12C:LTR:ERV1:+	0.691074
SVA_F:Other:Other:+	0.564075			L1PA4:LINE:L1:-	0.400794			LTR12C:LTR:ERV1:-	0.0352941
SVA_E:Other:Other:+	0.38322			L1PA7:LINE:L1:+	0.119615			LTR12C:LTR:ERV1:-	0.270899
SVA_D:Other:Other:+	0.152499			L1PA5:LINE:L1:+	0.493155			LTR12C:LTR:ERV1:+	0.87291
SVA_D:Other:Other:-	0.0123457			L1PA4:LINE:L1:-	0.279823			LTR12C:LTR:ERV1:-	0.0934524
SVA_D:Other:Other:-	0.0963367			L1PA4:LINE:L1:+	0.586376			LTR12C:LTR:ERV1:+	0.303753
SVA_D:Other:Other:+	0.0626932			L1PA4:LINE:L1:-	0.762136			LTR12C:LTR:ERV1:+	0.58403
SVA_C:Other:Other:-	0.189295			L1PA2:LINE:L1:+	0.337363			LTR12C:LTR:ERV1:-	0.163921
SVA_D:Other:Other:-	0.033179			L1PA3:LINE:L1:+	0.420448			LTR12:LTR:ERV1:+	0.598798
SVA_B:Other:Other:+	0.0138219			L1PA7:LINE:L1:+	0.512417			LTR12C:LTR:ERV1:-	0.128211
SVA_D:Other:Other:+	0.0874609			L1PA3:LINE:L1:-	0.646561			LTR12C:LTR:ERV1:-	0.698488
SVA_D:Other:Other:+	0.104082			L1PA2:LINE:L1:-	0.513379			LTR12C:LTR:ERV1:-	0.344965
SVA_D:Other:Other:+	0.0411765			L1PB1:LINE:L1:+	0.224006			LTR12C:LTR:ERV1:-	0.536303
SVA_F:Other:Other:+	0.025463			L1PA3:LINE:L1:+	0.7548			LTR12C:LTR:ERV1:+	0.713092
SVA_D:Other:Other:+	0.0189394			L1PA7:LINE:L1:-	0.197995			LTR12C:LTR:ERV1:+	0.0599225
SVA_D:Other:Other:-	0.0428571			L1PA3:LINE:L1:-	0.540947			LTR12C:LTR:ERV1:-	0.63554
SVA_D:Other:Other:+	0.151139			L1PA4:LINE:L1:+	0.462879			LTR12C:LTR:ERV1:+	0.247118
SVA_D:Other:Other:+	0.0923077			L1PA5:LINE:L1:-	0.659605			LTR12C:LTR:ERV1:-	0.64869
SVA_A:Other:Other:-	0.634979			L1PA7:LINE:L1:+	0.461791			LTR12C:LTR:ERV1:+	0.487109
SVA_D:Other:Other:+	0.450471			L1PA3:LINE:L1:+	0.53771			LTR12C:LTR:ERV1:+	0.20069
SVA_D:Other:Other:+	0.142509			L1PA5:LINE:L1:-	0.734055			LTR12C:LTR:ERV1:-	0.559921
SVA_D:Other:Other:+	0.069141			L1PA4:LINE:L1:+	0.578344			LTR12C:LTR:ERV1:+	0.0901235
SVA_D:Other:Other:+	0.175674			L1PA5:LINE:L1:+	0.47567			LTR12C:LTR:ERV1:+	0.570168
SVA_D:Other:Other:+	0.241699			L1PA3:LINE:L1:+	0.629085			LTR12C:LTR:ERV1:+	0.377473
SVA_B:Other:Other:+	0.605419			L1PA3:LINE:L1:-	0.689827			LTR12C:LTR:ERV1:+	0.817314
SVA_D:Other:Other:+	0.251777			L1PA3:LINE:L1:+	0.479487			LTR12C:LTR:ERV1:+	0.244643
SVA_B:Other:Other:-	0.411114			L1PA6:LINE:L1:+	0.776587			LTR12C:LTR:ERV1:-	0.0318841
SVA_E:Other:Other:+	0.10402			L1PA2:LINE:L1:-	0.277814			LTR12C:LTR:ERV1:-	0.464448
SVA_F:Other:Other:+	0.0874761			L1PA8A:LINE:L1:+	0.158413			LTR12C:LTR:ERV1:+	0.0998016
SVA_D:Other:Other:-	0.0333333			L1PA3:LINE:L1:+	0.613244			LTR12C:LTR:ERV1:-	0.271339
SVA_D:Other:Other:+	0.190061			L1PA3:LINE:L1:-	0.179654			LTR12C:LTR:ERV1:-	0.166893
SVA_A:Other:Other:-	0.279806			L1PA6:LINE:L1:-	0.636364			LTR12C:LTR:ERV1:-	0.579978
SVA_D:Other:Other:-	0.17521			L1PA7:LINE:L1:-	0.492361			LTR12D:LTR:ERV1:+	0.746032
SVA_D:Other:Other:-	0.106811			L1PA6:LINE:L1:-	0.468132			LTR12C:LTR:ERV1:+	0.0451389
SVA_D:Other:Other:+	0.160194			L1PA3:LINE:L1:+	0.494577			LTR12C:LTR:ERV1:-	0.135876
SVA_B:Other:Other:-	0.721296			L1PA6:LINE:L1:-	0.143991			LTR12C:LTR:ERV1:-	0.686996
SVA_B:Other:Other:+	0.572552			L1PA2:LINE:L1:+	0.255407			LTR12D:LTR:ERV1:-	0.614079
SVA_D:Other:Other:+	0.056282			L1PA4:LINE:L1:+	0.547592			LTR12_:LTR:ERV1:-	0.448214
SVA_A:Other:Other:+	0.267455			L1PA3:LINE:L1:+	0.433279			LTR12_:LTR:ERV1:+	0.159921
SVA_D:Other:Other:+	0.0222222			L1PA6:LINE:L1:+	0.320962			LTR12_:LTR:ERV1:+	0.190238
SVA_D:Other:Other:-	0.204722			L1PA2:LINE:L1:+	0.113605			LTR12C:LTR:ERV1:+	0.288243
SVA_D:Other:Other:-	0.494134			L1PA6:LINE:L1:-	0.0905093			LTR12C:LTR:ERV1:+	0.27807
SVA_A:Other:Other:-	0.62881			L1PA4:LINE:L1:-	0.526667			LTR12C:LTR:ERV1:-	0.559143
SVA_D:Other:Other:-	0.231621			L1PA3:LINE:L1:-	0.600045			LTR12C:LTR:ERV1:+	0.411751
SVA_B:Other:Other:-	0.0818122			L1PA6:LINE:L1:+	0.116667			LTR12C:LTR:ERV1:-	0.183242
SVA_D:Other:Other:-	0.341412			L1PA6:LINE:L1:-	0.352617			LTR12C:LTR:ERV1:-	0
SVA_B:Other:Other:+	0.0796594			L1PA2:LINE:L1:+	0.724242			LTR12_:LTR:ERV1:+	0.572751
SVA_D:Other:Other:-	0.217262			L1PA7:LINE:L1:+	0.148571			LTR12C:LTR:ERV1:-	0.490671
SVA_F:Other:Other:-	0.19329			L1PA5:LINE:L1:+	0.581324			LTR12F:LTR:ERV1:+	0.488128
SVA_D:Other:Other:+	0.184921			L1PA6:LINE:L1:-	0.517898			LTR12C:LTR:ERV1:+	0.781715
SVA_A:Other:Other:-	0.64353			L1PA3:LINE:L1:+	0.655615			LTR12C:LTR:ERV1:-	0.558952
SVA_B:Other:Other:-	0.735348			L1PA6:LINE:L1:-	0.290731			LTR12C:LTR:ERV1:-	0.0355556
SVA_D:Other:Other:-	0.138842			L1PA5:LINE:L1:+	0.548148			LTR12D:LTR:ERV1:+	0.317834
SVA_B:Other:Other:+	0.412302			L1PA5:LINE:L1:+	0.323347			LTR12C:LTR:ERV1:-	0.197597
SVA_C:Other:Other:-	0.201317			L1PA3:LINE:L1:+	0.715973			LTR12C:LTR:ERV1:+	0.634434
SVA_D:Other:Other:+	0.11673			L1P2:LINE:L1:+	0.570635			LTR12C:LTR:ERV1:-	0.708445
SVA_D:Other:Other:-	0.330556			L1PB1:LINE:L1:+	0.133016			LTR12C:LTR:ERV1:-	0.329097
SVA_B:Other:Other:-	0.623562			L1PA5:LINE:L1:-	0.612879			LTR12C:LTR:ERV1:+	0.0741703
SVA_B:Other:Other:-	0.0161483			L1PA6:LINE:L1:+	0.138095			LTR12C:LTR:ERV1:+	0.263479
SVA_D:Other:Other:+	0.0452991			L1PA5:LINE:L1:+	0.576329			LTR12C:LTR:ERV1:-	0.799117
SVA_D:Other:Other:+	0.0225942			L1PA7:LINE:L1:-	0.709325			LTR12C:LTR:ERV1:-	0.137963
SVA_D:Other:Other:+	0.250828			L1PA3:LINE:L1:-	0.503423			LTR12C:LTR:ERV1:-	0.799737
SVA_C:Other:Other:+	0.757371			L1PA6:LINE:L1:+	0.525476			LTR12C:LTR:ERV1:-	0.0368421
SVA_D:Other:Other:+	0.170719			L1PA3:LINE:L1:-	0.741387			LTR12D:LTR:ERV1:-	0.320933
SVA_B:Other:Other:-	0.0550044			L1PA4:LINE:L1:+	0.692079			LTR12C:LTR:ERV1:+	0.71258
SVA_B:Other:Other:-	0.254448			L1PA5:LINE:L1:-	0.487566			LTR12:LTR:ERV1:+	0.596786
SVA_D:Other:Other:+	0.0233516			L1PA5:LINE:L1:+	0.468529			LTR12C:LTR:ERV1:+	0.235247
SVA_D:Other:Other:+	0.0133668			L1PA5:LINE:L1:-	0.57246			LTR12C:LTR:ERV1:-	0.631588
SVA_D:Other:Other:-	0.0285714			L1PA3:LINE:L1:-	0.265476			LTR12C:LTR:ERV1:-	0.778947
SVA_B:Other:Other:+	0.0239669			L1PA6:LINE:L1:-	0.127712			LTR12C:LTR:ERV1:+	0.534364
SVA_D:Other:Other:+	0.0292743			L1PA5:LINE:L1:+	0.446763			LTR12C:LTR:ERV1:-	0.69898
SVA_D:Other:Other:-	0			L1PA3:LINE:L1:-	0.253348			LTR12C:LTR:ERV1:+	0.411508
SVA_D:Other:Other:+	0.045786			L1PA4:LINE:L1:-	0.29127			LTR12C:LTR:ERV1:-	0.0690476
SVA_D:Other:Other:+	0.0753968			L1PA4:LINE:L1:-	0.538375			LTR12C:LTR:ERV1:-	0.668368
SVA_C:Other:Other:-	0.0516865			L1PA3:LINE:L1:+	0.504473			LTR12D:LTR:ERV1:-	0.20997
SVA_D:Other:Other:-	0.0078125			L1PA6:LINE:L1:+	0.55641			LTR12D:LTR:ERV1:-	0.455832
SVA_D:Other:Other:-	0.156009			L1PA4:LINE:L1:+	0.494872			LTR12C:LTR:ERV1:+	0.780856
SVA_B:Other:Other:+	0.010101			L1PA5:LINE:L1:-	0.361508			LTR12D:LTR:ERV1:+	0.181777
SVA_C:Other:Other:+	0.0844444			L1PA6:LINE:L1:-	0.558402			LTR12:LTR:ERV1:-	0.701443
SVA_D:Other:Other:+	0			L1PA5:LINE:L1:+	0.264616			LTR12C:LTR:ERV1:+	0.253843
SVA_B:Other:Other:-	0.102183			L1PA5:LINE:L1:-	0.525994			LTR12_:LTR:ERV1:-	0.231111
SVA_C:Other:Other:-	0.092597			L1PA2:LINE:L1:+	0.4375			LTR12D:LTR:ERV1:+	0.0314815
SVA_D:Other:Other:-	0.17733			L1PA4:LINE:L1:+	0.4575			LTR12C:LTR:ERV1:+	0.849403
SVA_B:Other:Other:-	0.198506			L1PA4:LINE:L1:+	0.698301			LTR12C:LTR:ERV1:+	0.709585
SVA_D:Other:Other:+	0.0237025			L1PA3:LINE:L1:+	0.705051			LTR12C:LTR:ERV1:-	0.248616
SVA_B:Other:Other:-	0.199794			L1PA3:LINE:L1:+	0.606363			LTR12C:LTR:ERV1:+	0.135808
SVA_C:Other:Other:+	0.304494			L1PA5:LINE:L1:+	0.313959			LTR12C:LTR:ERV1:-	0.197169
SVA_C:Other:Other:-	0.057604			L1PA3:LINE:L1:-	0.67123			LTR12C:LTR:ERV1:+	0.718954
SVA_C:Other:Other:+	0.403608			L1PA4:LINE:L1:+	0.453766			LTR12C:LTR:ERV1:+	0.782568
SVA_D:Other:Other:+	0.0867586			L1PA3:LINE:L1:-	0.457837			LTR12C:LTR:ERV1:+	0.33475
SVA_D:Other:Other:-	0.213657			L1PA4:LINE:L1:-	0.420635			LTR12C:LTR:ERV1:-	0.670087
SVA_C:Other:Other:-	0.0340136			L1PA4:LINE:L1:+	0.42674			LTR12C:LTR:ERV1:+	0.644062
SVA_D:Other:Other:+	0.00937951			L1PA3:LINE:L1:+	0.546599			LTR12C:LTR:ERV1:+	0.221651
SVA_D:Other:Other:-	0.0971306			L1PA3:LINE:L1:+	0.47123			LTR12C:LTR:ERV1:-	0
SVA_D:Other:Other:-	0.126689			L1PA7:LINE:L1:+	0.63745			LTR12C:LTR:ERV1:-	0.215046
SVA_C:Other:Other:-	0.221772			L1PA3:LINE:L1:-	0.716667			LTR12C:LTR:ERV1:+	0.00740741
SVA_B:Other:Other:+	0.180056			L1PA3:LINE:L1:+	0.68287			LTR12C:LTR:ERV1:+	0.351296
SVA_D:Other:Other:+	0.116162			L1PA4:LINE:L1:+	0.47845			LTR12C:LTR:ERV1:+	0.722677
SVA_D:Other:Other:+	0.0282051			L1PA5:LINE:L1:-	0.469147			LTR12F:LTR:ERV1:+	0.653214
SVA_D:Other:Other:+	0.0633333			L1PA3:LINE:L1:+	0.524244			LTR12C:LTR:ERV1:-	0.0810967
SVA_D:Other:Other:+	0.2574			L1PA7:LINE:L1:-	0.658586			LTR12C:LTR:ERV1:-	0.150301
SVA_D:Other:Other:+	0.083455			L1PA4:LINE:L1:-	0.665714			LTR12C:LTR:ERV1:+	0.0445971
SVA_B:Other:Other:-	0.067037			L1PA8:LINE:L1:+	0.230794			LTR12C:LTR:ERV1:-	0.114059
SVA_D:Other:Other:-	0.0741071			L1PA6:LINE:L1:+	0.492766			LTR12C:LTR:ERV1:-	0.363333
SVA_D:Other:Other:+	0.233163			L1PA4:LINE:L1:+	0.453373			LTR12_:LTR:ERV1:+	0.482407
SVA_A:Other:Other:-	0.618525			L1PA3:LINE:L1:-	0.514762			LTR12C:LTR:ERV1:+	0.455723
SVA_D:Other:Other:+	0.133069			L1PA5:LINE:L1:+	0.531389			LTR12C:LTR:ERV1:-	0.589556
SVA_D:Other:Other:-	0.108571			L1PA5:LINE:L1:-	0.520055			LTR12C:LTR:ERV1:+	0.665678
SVA_D:Other:Other:+	0.389211			L1PA5:LINE:L1:+	0.493598			LTR12C:LTR:ERV1:+	0.282733
SVA_D:Other:Other:-	0.0717391			L1PA4:LINE:L1:-	0.347265			LTR12C:LTR:ERV1:-	0.246929
SVA_D:Other:Other:+	0.0692641			L1PA4:LINE:L1:+	0.516667			LTR12C:LTR:ERV1:+	0.718196
SVA_E:Other:Other:+	0.19011			L1PA3:LINE:L1:+	0.558374			LTR12_:LTR:ERV1:+	0.783865
SVA_F:Other:Other:+	0.319455			L1PA3:LINE:L1:-	0.730925			LTR12C:LTR:ERV1:+	0.13426
SVA_A:Other:Other:+	0.51303			L1PA5:LINE:L1:+	0.106169			LTR12C:LTR:ERV1:+	0.0515306
SVA_C:Other:Other:-	0.602257			L1PA3:LINE:L1:+	0.592262			LTR12C:LTR:ERV1:+	0.184019
SVA_D:Other:Other:+	0.229046			L1PA4:LINE:L1:-	0.564211			LTR12C:LTR:ERV1:+	0.428959
SVA_A:Other:Other:-	0.708382			L1PA6:LINE:L1:+	0.578266			LTR12C:LTR:ERV1:-	0.290482
SVA_C:Other:Other:-	0.202866			L1PA4:LINE:L1:+	0.420879			LTR12C:LTR:ERV1:+	0.0691799
SVA_C:Other:Other:+	0.0574561			L1PA4:LINE:L1:+	0.728425			LTR12C:LTR:ERV1:-	0.00574713
SVA_D:Other:Other:+	0.164455			L1PA4:LINE:L1:-	0.652908			LTR12C:LTR:ERV1:-	0.341915
SVA_D:Other:Other:-	0			L1PA6:LINE:L1:+	0.30522			LTR12C:LTR:ERV1:-	0.446008
SVA_C:Other:Other:+	0.142645			L1PA7:LINE:L1:+	0.310891			LTR12C:LTR:ERV1:+	0.698214
SVA_D:Other:Other:+	0.228005			L1PA3:LINE:L1:+	0.594042			LTR12C:LTR:ERV1:+	0.563426
SVA_D:Other:Other:-	0.0315789			L1PA4:LINE:L1:+	0.466667			LTR12C:LTR:ERV1:-	0.28971
SVA_D:Other:Other:-	0.31602			L1PA7:LINE:L1:+	0.428938			LTR12C:LTR:ERV1:+	0.463105
SVA_D:Other:Other:+	0.124684			L1PA3:LINE:L1:+	0.651347			LTR12C:LTR:ERV1:+	0.71675
SVA_D:Other:Other:-	0.110007			L1PA2:LINE:L1:+	0.577579			LTR12C:LTR:ERV1:+	0.743673
SVA_D:Other:Other:-	0.141715			L1PA3:LINE:L1:+	0.381988			LTR12C:LTR:ERV1:+	0.719538
SVA_D:Other:Other:+	0.0557705			L1PA4:LINE:L1:-	0.708314			LTR12C:LTR:ERV1:-	0.761786
SVA_D:Other:Other:+	0.0903744			L1PA3:LINE:L1:-	0.752941			LTR12C:LTR:ERV1:+	0.237809
SVA_D:Other:Other:+	0.0406325			L1PA4:LINE:L1:-	0.578571			LTR12C:LTR:ERV1:+	0.0865556
SVA_F:Other:Other:+	0.129412			L1PA5:LINE:L1:-	0.616503			LTR12C:LTR:ERV1:-	0.832256
SVA_D:Other:Other:-	0.0208333			L1PA5:LINE:L1:-	0.521429			LTR12C:LTR:ERV1:-	0.247787
SVA_D:Other:Other:+	0.0866583			L1PA2:LINE:L1:-	0.789167			LTR12C:LTR:ERV1:+	0.781013
SVA_D:Other:Other:-	0.274208			L1PA4:LINE:L1:+	0.703571			LTR12C:LTR:ERV1:+	0.260324
SVA_D:Other:Other:+	0.0148148			L1PA3:LINE:L1:+	0.407234			LTR12C:LTR:ERV1:-	0.186984
SVA_F:Other:Other:+	0.0739648			L1PA7:LINE:L1:+	0.108543			LTR12C:LTR:ERV1:-	0.0276316
SVA_D:Other:Other:+	0.0560896			L1PA2:LINE:L1:-	0.52753			LTR12C:LTR:ERV1:+	0.566905
SVA_B:Other:Other:+	0.0111111			L1PB1:LINE:L1:+	0.117749			LTR12C:LTR:ERV1:-	0.0696649
SVA_D:Other:Other:-	0			L1PA4:LINE:L1:+	0.626444			LTR12C:LTR:ERV1:-	0.351757
SVA_D:Other:Other:-	0.284921			L1PA5:LINE:L1:+	0.728114			LTR12C:LTR:ERV1:+	0.379776
SVA_B:Other:Other:-	0.231951			L1PA7:LINE:L1:-	0.3671			LTR12C:LTR:ERV1:-	0.36955
SVA_D:Other:Other:-	0.135397			L1PA3:LINE:L1:-	0.400758			LTR12C:LTR:ERV1:+	0.103736
SVA_D:Other:Other:-	0.417676			L1PA3:LINE:L1:+	0.676812			LTR12C:LTR:ERV1:-	0
SVA_D:Other:Other:-	0.189594			L1PA5:LINE:L1:+	0.319813			LTR12D:LTR:ERV1:-	0.578919
SVA_D:Other:Other:+	0.1599			L1PA4:LINE:L1:+	0.650022			LTR12C:LTR:ERV1:-	0
SVA_D:Other:Other:+	0.0706349			L1PA4:LINE:L1:-	0.569312			LTR12C:LTR:ERV1:-	0.89558
SVA_D:Other:Other:-	0.122815			L1PA7:LINE:L1:-	0.562987			LTR12C:LTR:ERV1:-	0.081203
SVA_F:Other:Other:-	0.69826			L1PA3:LINE:L1:+	0.48411			LTR12C:LTR:ERV1:-	0.215238
SVA_C:Other:Other:-	0			L1PA4:LINE:L1:-	0.358452			LTR12C:LTR:ERV1:+	0.030303
SVA_D:Other:Other:+	0.295313			L1PA4:LINE:L1:+	0.589352			LTR12C:LTR:ERV1:+	0.748154
SVA_D:Other:Other:+	0.0957734			L1PA8:LINE:L1:-	0.170952			LTR12C:LTR:ERV1:-	0.209611
SVA_B:Other:Other:-	0.183503			L1PA3:LINE:L1:+	0.668943			LTR12C:LTR:ERV1:-	0.319568
SVA_B:Other:Other:+	0.0586332			L1PA6:LINE:L1:+	0.470337			LTR12:LTR:ERV1:+	0.387273
SVA_A:Other:Other:-	0.195915			L1PA4:LINE:L1:+	0.544305			LTR12D:LTR:ERV1:-	0.393044
SVA_D:Other:Other:+	0.612718			L1PA6:LINE:L1:-	0.496429			LTR12C:LTR:ERV1:+	0.682573
SVA_F:Other:Other:+	0.155737			L1PA2:LINE:L1:-	0.387558			LTR12C:LTR:ERV1:+	0.235042
SVA_D:Other:Other:+	0.0494479			L1PA5:LINE:L1:+	0.512902			LTR12C:LTR:ERV1:+	0.709592
SVA_F:Other:Other:+	0.0185445			L1PA4:LINE:L1:+	0.575143			LTR12C:LTR:ERV1:+	0.0148148
SVA_C:Other:Other:-	0.0862745			L1PA4:LINE:L1:-	0.712837			LTR12C:LTR:ERV1:-	0.543747
SVA_B:Other:Other:+	0.0213294			L1PA3:LINE:L1:-	0.572392			LTR12D:LTR:ERV1:+	0.487789
SVA_D:Other:Other:-	0.169697			L1PA7:LINE:L1:+	0.130978			LTR12C:LTR:ERV1:+	0.104882
SVA_D:Other:Other:-	0.115397			L1PA7:LINE:L1:+	0.156764			LTR12C:LTR:ERV1:-	0.0564103
SVA_D:Other:Other:-	0.0809546			L1PA7:LINE:L1:-	0.575938			LTR12C:LTR:ERV1:-	0.633789
SVA_D:Other:Other:+	0.208189			L1PA5:LINE:L1:-	0.469979			LTR12C:LTR:ERV1:-	0.205282
SVA_C:Other:Other:+	0.0727891			L1PA2:LINE:L1:-	0.19619			LTR12C:LTR:ERV1:-	0.858522
SVA_D:Other:Other:-	0.0453416			L1PA5:LINE:L1:+	0.765952			LTR12C:LTR:ERV1:+	0.625053
SVA_C:Other:Other:+	0.151872			L1HS:LINE:L1:+	0.320833			LTR12C:LTR:ERV1:-	0.164109
SVA_D:Other:Other:-	0.198168			L1PA5:LINE:L1:-	0.576058			LTR12C:LTR:ERV1:-	0.0601449
SVA_B:Other:Other:-	0.186204			L1PA5:LINE:L1:+	0.484444			LTR12D:LTR:ERV1:-	0.503504
SVA_D:Other:Other:-	0.264103			L1PA7:LINE:L1:-	0.113651			LTR12C:LTR:ERV1:+	0.628394
SVA_D:Other:Other:-	0.332778			L1PA6:LINE:L1:-	0.243333			LTR12C:LTR:ERV1:+	0.547546
SVA_D:Other:Other:+	0.0478788			L1PA5:LINE:L1:+	0.675214			LTR12C:LTR:ERV1:+	0.189456
SVA_B:Other:Other:-	0.0179894			L1PA2:LINE:L1:+	0.17619			LTR12C:LTR:ERV1:-	0.078621
SVA_D:Other:Other:+	0.206988			L1PA3:LINE:L1:+	0.423718			LTR12C:LTR:ERV1:-	0.153388
SVA_D:Other:Other:-	0.154304			L1PA4:LINE:L1:-	0.740201			LTR12C:LTR:ERV1:-	0.643629
SVA_D:Other:Other:-	0.0524397			L1PA2:LINE:L1:+	0.0857143			LTR12:LTR:ERV1:+	0.245913
SVA_B:Other:Other:+	0.079808			L1PA5:LINE:L1:+	0.724242			LTR12C:LTR:ERV1:-	0.284866
SVA_A:Other:Other:-	0.637166			L1PA5:LINE:L1:+	0.331868			LTR12C:LTR:ERV1:-	0.720594
				L1PA7:LINE:L1:+	0.455357			LTR12C:LTR:ERV1:+	0.897583
				L1PA5:LINE:L1:+	0.663641			LTR12D:LTR:ERV1:-	0.568919
				L1PA5:LINE:L1:-	0.581746			LTR12C:LTR:ERV1:-	0.353638
				L1PA6:LINE:L1:+	0.534643			LTR12C:LTR:ERV1:+	0.05
				L1PA8:LINE:L1:+	0.500866			LTR12C:LTR:ERV1:-	0.744431
				L1PA7:LINE:L1:+	0.307692			LTR12C:LTR:ERV1:-	0.614962
				L1PA4:LINE:L1:+	0.571473			LTR12C:LTR:ERV1:+	0.546381
				L1PA6:LINE:L1:-	0.285185			LTR12C:LTR:ERV1:-	0.786169
				L1PA6:LINE:L1:+	0.591234			LTR12C:LTR:ERV1:+	0.630464
				L1PA3:LINE:L1:-	0.778788			LTR12C:LTR:ERV1:-	0.0699861
				L1PA5:LINE:L1:-	0.514002			LTR12C:LTR:ERV1:-	0.513127
				L1PA6:LINE:L1:-	0.637915			LTR12C:LTR:ERV1:+	0.0763039
				L1PA3:LINE:L1:-	0.460905			LTR12C:LTR:ERV1:+	0.633437
				L1PA4:LINE:L1:-	0.535065			LTR12C:LTR:ERV1:+	0.696878
				L1PA4:LINE:L1:+	0.378054			LTR12C:LTR:ERV1:+	0.134336
				L1PA3:LINE:L1:+	0.604816			LTR12C:LTR:ERV1:-	0.52027
				L1PA7:LINE:L1:+	0.240714			LTR12C:LTR:ERV1:+	0.770855
				L1PA3:LINE:L1:-	0.507738			LTR12C:LTR:ERV1:-	0.712491
				L1PA4:LINE:L1:-	0.623701			LTR12C:LTR:ERV1:+	0.197003
				L1PA7:LINE:L1:-	0.170139			LTR12C:LTR:ERV1:-	0.80141
				L1PA2:LINE:L1:+	0.42381			LTR12C:LTR:ERV1:-	0.0683333
				L1PA4:LINE:L1:+	0.45878			LTR12C:LTR:ERV1:+	0.720925
				L1PA2:LINE:L1:+	0.404113			LTR12C:LTR:ERV1:+	0.0302536
				L1PA2:LINE:L1:-	0.612637			LTR12C:LTR:ERV1:-	0.0728015
				L1PA4:LINE:L1:+	0.58297			LTR12C:LTR:ERV1:-	0.190267
				L1PA4:LINE:L1:-	0.580952			LTR12C:LTR:ERV1:+	0.1
				L1PA4:LINE:L1:+	0.22955			LTR12C:LTR:ERV1:+	0.431915
				L1PA4:LINE:L1:+	0.560623			LTR12C:LTR:ERV1:+	0.75172
				L1PA4:LINE:L1:+	0.480208			LTR12C:LTR:ERV1:+	0.534687
				L1PA3:LINE:L1:+	0.700548			LTR12D:LTR:ERV1:+	0.206953
				L1PA3:LINE:L1:-	0.483516			LTR12C:LTR:ERV1:-	0.218051
				L1PA5:LINE:L1:-	0.524074			LTR12C:LTR:ERV1:+	0.648188
				L1PA8:LINE:L1:+	0.292897			LTR12C:LTR:ERV1:+	0.043956
				L1PA7:LINE:L1:+	0.23619			LTR12C:LTR:ERV1:-	0.241893
				L1PA4:LINE:L1:-	0.696719			LTR12C:LTR:ERV1:+	0.557269
				L1PA4:LINE:L1:-	0.569597			LTR12C:LTR:ERV1:+	0.105067
				L1PA7:LINE:L1:-	0.381319			LTR12C:LTR:ERV1:+	0.725695
				L1PA3:LINE:L1:+	0.603472			LTR12C:LTR:ERV1:+	0.779216
				L1PA5:LINE:L1:+	0.614253			LTR12C:LTR:ERV1:-	0.96219
				L1PA5:LINE:L1:+	0.585606			LTR12C:LTR:ERV1:+	0.0855556
				L1PA3:LINE:L1:+	0.497234			LTR12C:LTR:ERV1:+	0.502718
				L1PA7:LINE:L1:-	0.281481			LTR12C:LTR:ERV1:+	0.521724
				L1PA5:LINE:L1:-	0.56881			LTR12C:LTR:ERV1:-	0.607498
				L1PA3:LINE:L1:+	0.446779			LTR12D:LTR:ERV1:+	0.0166667
				L1HS:LINE:L1:+	0.481349			LTR12C:LTR:ERV1:+	0.302792
				L1HS:LINE:L1:-	0.5754			LTR12C:LTR:ERV1:+	0.725689
				L1PA4:LINE:L1:-	0.337242			LTR12C:LTR:ERV1:+	0.707908
				L1PA3:LINE:L1:-	0.588435			LTR12C:LTR:ERV1:-	0.400248
				L1PA3:LINE:L1:+	0.198244			LTR12C:LTR:ERV1:-	0.764935
				L1PA4:LINE:L1:-	0.554139			LTR12C:LTR:ERV1:+	0.774524
				L1PA4:LINE:L1:+	0.609184			LTR12C:LTR:ERV1:+	0.564756
				L1PA3:LINE:L1:-	0.490816			LTR12C:LTR:ERV1:-	0.357086
				L1PA4:LINE:L1:-	0.433413			LTR12C:LTR:ERV1:-	0.760287
				L1PA8:LINE:L1:+	0.197944			LTR12C:LTR:ERV1:-	0.72702
				L1PA3:LINE:L1:-	0.594805			LTR12C:LTR:ERV1:-	0.28286
				L1PA2:LINE:L1:-	0.341637			LTR12C:LTR:ERV1:+	0.0504534
				L1PA6:LINE:L1:+	0.187727			LTR12_:LTR:ERV1:+	0.456441
				L1PA7:LINE:L1:-	0.389167			LTR12C:LTR:ERV1:+	0.591567
				L1PA5:LINE:L1:-	0.456651			LTR12C:LTR:ERV1:-	0.738995
				L1PA4:LINE:L1:-	0.471581			LTR12C:LTR:ERV1:+	0.683524
				L1PA4:LINE:L1:+	0.539802			LTR12C:LTR:ERV1:-	0.924443
				L1PA3:LINE:L1:+	0.377679			LTR12C:LTR:ERV1:+	0.209965
				L1PA4:LINE:L1:-	0.499235			LTR12C:LTR:ERV1:+	0.170664
				L1PA4:LINE:L1:+	0.615443			LTR12C:LTR:ERV1:-	0.724878
				L1PA4:LINE:L1:-	0.683283			LTR12C:LTR:ERV1:+	0.755046
				L1PA4:LINE:L1:+	0.562456			LTR12C:LTR:ERV1:-	0.0619898
				L1PA4:LINE:L1:-	0.562346			LTR12C:LTR:ERV1:-	0.700357
				L1PA6:LINE:L1:-	0.31359			LTR12D:LTR:ERV1:-	0.619238
				L1PA5:LINE:L1:-	0.268182			LTR12C:LTR:ERV1:-	0.0687669
				L1PA2:LINE:L1:-	0.619057			LTR12C:LTR:ERV1:-	0.717293
				L1PA5:LINE:L1:-	0.675283			LTR12C:LTR:ERV1:+	0.215252
				L1PA3:LINE:L1:+	0.757181			LTR12C:LTR:ERV1:-	0.115263
				L1PA5:LINE:L1:+	0.674858			LTR12D:LTR:ERV1:+	0.362793
				L1PA5:LINE:L1:-	0.548352			LTR12C:LTR:ERV1:-	0.134131
				L1PA5:LINE:L1:-	0.702857			LTR12C:LTR:ERV1:+	0.0989704
				L1PA7:LINE:L1:-	0.177194			LTR12C:LTR:ERV1:-	0.108333
				L1PA5:LINE:L1:+	0.575397			LTR12C:LTR:ERV1:+	0.0736772
				L1PA4:LINE:L1:+	0.474233			LTR12C:LTR:ERV1:+	0.72619
				L1PA7:LINE:L1:-	0			LTR12E:LTR:ERV1:+	0.676348
				L1PA4:LINE:L1:-	0.669643			LTR12C:LTR:ERV1:+	0.0519481
				L1PA2:LINE:L1:+	0.501146			LTR12C:LTR:ERV1:-	0.774957
				L1PA3:LINE:L1:+	0.691799			LTR12C:LTR:ERV1:+	0.681672
				L1PA5:LINE:L1:+	0.661039			LTR12C:LTR:ERV1:+	0.438519
				L1PA5:LINE:L1:-	0.582051			LTR12C:LTR:ERV1:+	0.0911111
				L1PA8:LINE:L1:-	0.290249			LTR12C:LTR:ERV1:+	0.388918
				L1PA5:LINE:L1:+	0.502564			LTR12C:LTR:ERV1:+	0.739451
				L1PA2:LINE:L1:+	0.455608			LTR12D:LTR:ERV1:-	0.618519
				L1PA3:LINE:L1:-	0.459127			LTR12C:LTR:ERV1:-	0.773115
				L1PA4:LINE:L1:+	0.564146			LTR12C:LTR:ERV1:-	0.427143
				L1PA3:LINE:L1:+	0.561569			LTR12C:LTR:ERV1:+	0.395599
				L1PA6:LINE:L1:+	0.296978			LTR12C:LTR:ERV1:+	0.627083
				L1PA6:LINE:L1:+	0.501012			LTR12C:LTR:ERV1:-	0.907653
				L1PA6:LINE:L1:+	0.485714			LTR12C:LTR:ERV1:-	0.352422
				L1PA6:LINE:L1:-	0.473333			LTR12C:LTR:ERV1:+	0.0438714
				L1HS:LINE:L1:-	0.0807407			LTR12C:LTR:ERV1:+	0.786196
				L1PA7:LINE:L1:+	0.189021			LTR12C:LTR:ERV1:-	0.264071
				L1PA5:LINE:L1:-	0.509524			LTR12C:LTR:ERV1:-	0.257151
				L1PA2:LINE:L1:-	0.692857			LTR12C:LTR:ERV1:-	0.705
				L1PA2:LINE:L1:-	0.182313			LTR12C:LTR:ERV1:-	0.182437
				L1PA3:LINE:L1:+	0.495408			LTR12C:LTR:ERV1:-	0.440535
				L1PA5:LINE:L1:-	0.636788			LTR12C:LTR:ERV1:-	0.214761
				L1PA7:LINE:L1:+	0.411905			LTR12C:LTR:ERV1:+	0.714172
				L1PA6:LINE:L1:+	0.281162			LTR12D:LTR:ERV1:-	0.292996
				L1PA5:LINE:L1:-	0.106061			LTR12C:LTR:ERV1:-	0.0550505
				L1PA5:LINE:L1:+	0.581481			LTR12C:LTR:ERV1:-	0.00520833
				L1PA5:LINE:L1:+	0.59051			LTR12C:LTR:ERV1:+	0.863316
				L1PA8A:LINE:L1:-	0.468939			LTR12C:LTR:ERV1:-	0.744728
				L1PA3:LINE:L1:-	0.637753			LTR12C:LTR:ERV1:-	0.403413
				L1PA2:LINE:L1:-	0.329524			LTR12C:LTR:ERV1:-	0.554475
				L1PA6:LINE:L1:+	0.0926768			LTR12C:LTR:ERV1:+	0.0974596
				L1PA5:LINE:L1:+	0.407407			LTR12C:LTR:ERV1:+	0.00555556
				L1PA2:LINE:L1:-	0.616534			LTR12E:LTR:ERV1:+	0.0333333
				L1PA4:LINE:L1:+	0.430303			LTR12C:LTR:ERV1:+	0.791637
				L1PA3:LINE:L1:+	0.538462			LTR12C:LTR:ERV1:-	0.671451
				L1PA7:LINE:L1:+	0.407038			LTR12C:LTR:ERV1:+	0.0997024
				L1PA2:LINE:L1:-	0.548352			LTR12C:LTR:ERV1:-	0.107939
				L1PA4:LINE:L1:+	0.41075			LTR12C:LTR:ERV1:-	0.201259
				L1PA6:LINE:L1:+	0.237071			LTR12C:LTR:ERV1:-	0.627029
				L1PA3:LINE:L1:-	0.513684			LTR12C:LTR:ERV1:-	0.701578
				L1PA2:LINE:L1:-	0.311938			LTR12C:LTR:ERV1:-	0.230511
				L1PA3:LINE:L1:-	0.756642			LTR12C:LTR:ERV1:-	0.0558214
				L1PA7:LINE:L1:+	0.592328			LTR12C:LTR:ERV1:-	0.377753
				L1PA6:LINE:L1:+	0.609772			LTR12C:LTR:ERV1:+	0.11119
				L1PA3:LINE:L1:+	0.419167			LTR12C:LTR:ERV1:+	0.407696
				L1PA4:LINE:L1:+	0.62568			LTR12C:LTR:ERV1:+	0.577482
				L1PA6:LINE:L1:-	0.513943			LTR12D:LTR:ERV1:-	0.670294
				L1PA7:LINE:L1:+	0.344255			LTR12C:LTR:ERV1:+	0.366607
				L1PA2:LINE:L1:+	0.336905			LTR12C:LTR:ERV1:-	0.694254
				L1PA3:LINE:L1:+	0.567227			LTR12C:LTR:ERV1:+	0.10295
				L1PA7:LINE:L1:+	0.0486111			LTR12C:LTR:ERV1:+	0.54073
				L1PA3:LINE:L1:-	0.638128			LTR12C:LTR:ERV1:+	0.738667
				L1PA7:LINE:L1:+	0.337229			LTR12D:LTR:ERV1:+	0.560053
				L1PA4:LINE:L1:-	0.668056			LTR12C:LTR:ERV1:+	0.474405
				L1PA6:LINE:L1:+	0.165774			LTR12C:LTR:ERV1:-	0.698313
				L1PA4:LINE:L1:-	0.711538			LTR12C:LTR:ERV1:-	0.300881
				L1PA3:LINE:L1:+	0.49906			LTR12C:LTR:ERV1:-	0.522789
				L1PA6:LINE:L1:+	0.586429			LTR12C:LTR:ERV1:+	0.403236
				L1PA4:LINE:L1:-	0.51498			LTR12C:LTR:ERV1:-	0.603571
				L1PA3:LINE:L1:+	0.0634615			LTR12C:LTR:ERV1:-	0.786935
				L1PA5:LINE:L1:+	0.686921			LTR12C:LTR:ERV1:+	0.257525
				L1PA6:LINE:L1:+	0.453929			LTR12_:LTR:ERV1:+	0.543545
				L1PA6:LINE:L1:+	0.617017			LTR12C:LTR:ERV1:-	0.473751
				L1PA3:LINE:L1:+	0.657835			LTR12C:LTR:ERV1:-	0.433995
				L1PA5:LINE:L1:+	0.697059			LTR12C:LTR:ERV1:+	0.425828
				L1PA4:LINE:L1:+	0.722024			LTR12C:LTR:ERV1:+	0.167381
				L1PA4:LINE:L1:+	0.462904			LTR12C:LTR:ERV1:-	0.382265
				L1PA4:LINE:L1:-	0.772854			LTR12D:LTR:ERV1:+	0.592308
				L1PA8A:LINE:L1:-	0.169881			LTR12D:LTR:ERV1:-	0.345996
				L1PA5:LINE:L1:-	0.652817			LTR12C:LTR:ERV1:+	0.605661
				L1PA3:LINE:L1:+	0.657778			LTR12C:LTR:ERV1:-	0.771429
				L1PA7:LINE:L1:+	0.133333			LTR12C:LTR:ERV1:+	0.316322
				L1PA8:LINE:L1:+	0.173129			LTR12C:LTR:ERV1:+	0.4806
				L1PA6:LINE:L1:+	0.490062			LTR12:LTR:ERV1:+	0.628316
				L1PA3:LINE:L1:+	0.577024			LTR12C:LTR:ERV1:+	0.539741
				L1PA3:LINE:L1:+	0.15			LTR12:LTR:ERV1:+	0.305556
				L1PA3:LINE:L1:-	0.625677			LTR12C:LTR:ERV1:+	0.798038
				L1PA6:LINE:L1:+	0.423583			LTR12C:LTR:ERV1:+	0.116321
				L1PA2:LINE:L1:+	0.139014			LTR12C:LTR:ERV1:-	0.247751
				L1PA3:LINE:L1:+	0.484354			LTR12C:LTR:ERV1:-	0.247851
				L1PA4:LINE:L1:+	0.578139			LTR12_:LTR:ERV1:+	0.125389
				L1PA5:LINE:L1:-	0.608959			LTR12C:LTR:ERV1:+	0.106541
				L1P3:LINE:L1:+	0.463131			LTR12C:LTR:ERV1:+	0.152024
				L1PA3:LINE:L1:+	0.645199			LTR12C:LTR:ERV1:-	0.37528
				L1PA4:LINE:L1:+	0.39246			LTR12C:LTR:ERV1:+	0.154137
				L1PA3:LINE:L1:+	0.0878788			LTR12C:LTR:ERV1:+	0.231779
				L1PA4:LINE:L1:+	0.552889			LTR12C:LTR:ERV1:-	0.516997
				L1PA5:LINE:L1:+	0.361508			LTR12C:LTR:ERV1:-	0.347619
				L1PA6:LINE:L1:+	0.607359			LTR12C:LTR:ERV1:-	0.0900952
				L1PA6:LINE:L1:+	0.334444			LTR12D:LTR:ERV1:-	0.527871
				L1PA4:LINE:L1:+	0.431293			LTR12C:LTR:ERV1:-	0.787937
				L1PA8:LINE:L1:-	0.0352564			LTR12:LTR:ERV1:-	0.365758
				L1PA5:LINE:L1:+	0.30428			LTR12C:LTR:ERV1:+	0.602052
				L1PA4:LINE:L1:+	0.632341			LTR12C:LTR:ERV1:+	0.234921
				L1PA3:LINE:L1:-	0.603624			LTR12C:LTR:ERV1:-	0.773046
				L1PA3:LINE:L1:+	0.346032			LTR12C:LTR:ERV1:+	0.288115
				L1PA3:LINE:L1:+	0.319328			LTR12C:LTR:ERV1:-	0.424739
				L1PA3:LINE:L1:-	0.751997			LTR12C:LTR:ERV1:-	0.588393
				L1PA2:LINE:L1:-	0.576515			LTR12C:LTR:ERV1:+	0.190067
				L1PA4:LINE:L1:-	0.411961			LTR12C:LTR:ERV1:+	0.612758
				L1PA4:LINE:L1:+	0.780688			LTR12C:LTR:ERV1:-	0.444405
				L1PA5:LINE:L1:+	0.330303			LTR12C:LTR:ERV1:+	0.493526
				L1PA2:LINE:L1:-	0.361039			LTR12C:LTR:ERV1:+	0.2167
				L1PA3:LINE:L1:-	0.0142857			LTR12C:LTR:ERV1:-	0.214583
				L1PA3:LINE:L1:-	0.378144			LTR12C:LTR:ERV1:+	0.60897
				L1PA6:LINE:L1:+	0.135525			LTR12C:LTR:ERV1:+	0.813299
				L1PA3:LINE:L1:+	0.500926			LTR12F:LTR:ERV1:+	0.256139
				L1PA4:LINE:L1:-	0.728019			LTR12E:LTR:ERV1:-	0.0806548
				L1PA3:LINE:L1:-	0.435806			LTR12C:LTR:ERV1:+	0.39064
				L1PA7:LINE:L1:+	0.532906			LTR12C:LTR:ERV1:-	0.662827
				L1PA4:LINE:L1:+	0.670635			LTR12C:LTR:ERV1:-	0.431782
				L1PA4:LINE:L1:-	0.751342			LTR12C:LTR:ERV1:+	0.0463235
				L1PA4:LINE:L1:+	0.320238			LTR12C:LTR:ERV1:-	0.603975
				L1PA7:LINE:L1:+	0.189194			LTR12C:LTR:ERV1:-	0.186022
				L1PA5:LINE:L1:-	0.473214			LTR12C:LTR:ERV1:-	0.307698
				L1PA7:LINE:L1:+	0.370476			LTR12C:LTR:ERV1:+	0.634133
				L1PA4:LINE:L1:-	0.624008			LTR12C:LTR:ERV1:+	0.487978
				L1PA2:LINE:L1:+	0.397711			LTR12C:LTR:ERV1:+	0.676429
				L1PA4:LINE:L1:+	0.500744			LTR12C:LTR:ERV1:-	0.749093
				L1PA7:LINE:L1:+	0.0602125			LTR12C:LTR:ERV1:-	0.196606
				L1PA6:LINE:L1:+	0.415873			LTR12C:LTR:ERV1:+	0.22398
				L1PA3:LINE:L1:-	0.644956			LTR12C:LTR:ERV1:+	0.297955
				L1PA4:LINE:L1:+	0.716751			LTR12C:LTR:ERV1:+	0.467778
				L1PA6:LINE:L1:-	0.437798			LTR12C:LTR:ERV1:-	0.00268817
				L1PA6:LINE:L1:-	0.553297			LTR12C:LTR:ERV1:-	0.29483
				L1PA5:LINE:L1:+	0.628748			LTR12C:LTR:ERV1:+	0.0744937
				L1PA7:LINE:L1:+	0.210417			LTR12C:LTR:ERV1:-	0.0819444
				L1PA2:LINE:L1:+	0.658009			LTR12C:LTR:ERV1:-	0.03
				L1PA4:LINE:L1:+	0.556466			LTR12C:LTR:ERV1:+	0.211555
				L1PA7:LINE:L1:-	0.194697			LTR12C:LTR:ERV1:-	0.479464
				L1PA3:LINE:L1:-	0.518112			LTR12C:LTR:ERV1:-	0.419697
				L1PA4:LINE:L1:+	0.583006			LTR12C:LTR:ERV1:-	0.969444
				L1PA4:LINE:L1:-	0.777143			LTR12C:LTR:ERV1:-	0.579786
				L1PA3:LINE:L1:+	0.696789			LTR12C:LTR:ERV1:-	0.270357
				L1PA6:LINE:L1:-	0.355903			LTR12C:LTR:ERV1:+	0.189544
				L1PA6:LINE:L1:-	0.246753			LTR12C:LTR:ERV1:+	0.371289
				L1PA5:LINE:L1:-	0.328968			LTR12C:LTR:ERV1:+	0.633851
				L1PA4:LINE:L1:-	0.289137			LTR12C:LTR:ERV1:+	0.638095
				L1PA4:LINE:L1:-	0.410897			LTR12C:LTR:ERV1:+	0.608277
				L1PA6:LINE:L1:-	0.0497575			LTR12C:LTR:ERV1:-	0.737188
				L1PA3:LINE:L1:-	0.6625			LTR12C:LTR:ERV1:-	0.448854
				L1PA2:LINE:L1:-	0.195556			LTR12C:LTR:ERV1:-	0.314583
				L1PA5:LINE:L1:-	0.53619			LTR12C:LTR:ERV1:+	0.616883
				L1PA3:LINE:L1:+	0.320041			LTR12C:LTR:ERV1:-	0
				L1PA5:LINE:L1:+	0.627489			LTR12C:LTR:ERV1:-	0.619048
				L1PA3:LINE:L1:-	0.573389			LTR12C:LTR:ERV1:-	0.06
				L1PA4:LINE:L1:-	0.628707			LTR12C:LTR:ERV1:-	0.33
				L1PA4:LINE:L1:+	0.470185			LTR12C:LTR:ERV1:-	0.117999
				L1PA4:LINE:L1:+	0.06			LTR12D:LTR:ERV1:-	0.645607
				L1PA4:LINE:L1:+	0.428855			LTR12C:LTR:ERV1:+	0.112245
				L1P1:LINE:L1:+	0.490909			LTR12C:LTR:ERV1:+	0.010101
				L1PA4:LINE:L1:-	0.486984			LTR12C:LTR:ERV1:-	0.594872
				L1P1:LINE:L1:-	0.456667			LTR12C:LTR:ERV1:-	0.183168
				L1PA6:LINE:L1:+	0.529762			LTR12C:LTR:ERV1:-	0.112222
				L1PA6:LINE:L1:-	0.155556			LTR12C:LTR:ERV1:+	0.538855
				L1PA6:LINE:L1:+	0.19213			LTR12C:LTR:ERV1:+	0.846495
				L1PA3:LINE:L1:+	0.611544			LTR12C:LTR:ERV1:+	0.603968
				L1PA5:LINE:L1:-	0.542857			LTR12C:LTR:ERV1:-	0.174405
				L1PA5:LINE:L1:+	0.463418			LTR12C:LTR:ERV1:-	0.7625
				L1PA5:LINE:L1:-	0.498952			LTR12C:LTR:ERV1:-	0.771062
				L1PA2:LINE:L1:+	0.21131			LTR12C:LTR:ERV1:+	0.576429
				L1PA4:LINE:L1:+	0.384127			LTR12C:LTR:ERV1:-	0.501948
				L1PA4:LINE:L1:-	0.278205			LTR12C:LTR:ERV1:+	0.258775
				L1PA5:LINE:L1:+	0.470455			LTR12C:LTR:ERV1:-	0.423077
				L1PA5:LINE:L1:+	0.0706349			LTR12C:LTR:ERV1:-	0.764815
				L1PA2:LINE:L1:-	0.175			LTR12C:LTR:ERV1:-	0.773333
				L1PA7:LINE:L1:+	0.361111			LTR12C:LTR:ERV1:+	0.675505
				L1PA2:LINE:L1:+	0.315303			LTR12C:LTR:ERV1:-	0.677814
				L1PA5:LINE:L1:-	0.640079			LTR12C:LTR:ERV1:-	0.847917
				L1PA4:LINE:L1:+	0.51417			LTR12C:LTR:ERV1:+	0.525357
				L1PA6:LINE:L1:-	0.411547			LTR12C:LTR:ERV1:+	0.397751
				L1PA2:LINE:L1:-	0.170833			LTR12C:LTR:ERV1:+	0.133333
				L1PA3:LINE:L1:-	0.0809524			LTR12C:LTR:ERV1:-	0.180995
				L1PB1:LINE:L1:-	0.187619			LTR12C:LTR:ERV1:+	0.0864324
				L1PA7:LINE:L1:+	0.351429			LTR12C:LTR:ERV1:-	0.116245
				L1PA3:LINE:L1:+	0.254018			LTR12C:LTR:ERV1:-	0.618779
				L1PA2:LINE:L1:-	0.584425			LTR12C:LTR:ERV1:-	0.453732
				L1PA3:LINE:L1:+	0.569962			LTR12C:LTR:ERV1:-	0.849524
				L1PA2:LINE:L1:-	0.3			LTR12C:LTR:ERV1:-	0.660325
				L1PA3:LINE:L1:+	0.484405			LTR12C:LTR:ERV1:+	0.0652227
				L1PA6:LINE:L1:+	0.644286			LTR12C:LTR:ERV1:+	0.79596
				L1PA3:LINE:L1:+	0.680972			LTR12C:LTR:ERV1:+	0.392155
				L1PA6:LINE:L1:+	0.642532			LTR12C:LTR:ERV1:-	0.097371
				L1PA3:LINE:L1:+	0.527389			LTR12C:LTR:ERV1:+	0.426327
				L1PA7:LINE:L1:+	0.638073			LTR12D:LTR:ERV1:-	0.417216
				L1PA4:LINE:L1:+	0.629077			LTR12_:LTR:ERV1:-	0.477262
				L1PA5:LINE:L1:+	0.664105			LTR12C:LTR:ERV1:-	0.0654495
				L1PA2:LINE:L1:-	0.234788			LTR12C:LTR:ERV1:-	0.828848
				L1PA4:LINE:L1:+	0.650668			LTR12C:LTR:ERV1:+	0.120228
				L1PA5:LINE:L1:+	0.639035			LTR12C:LTR:ERV1:+	0.471996
				L1PA2:LINE:L1:-	0.330591			LTR12C:LTR:ERV1:+	0.0952381
				L1PA2:LINE:L1:+	0.124444			LTR12C:LTR:ERV1:-	0.0647321
				L1PA6:LINE:L1:+	0.50784			LTR12C:LTR:ERV1:+	0.304237
				L1PA4:LINE:L1:+	0.262987			LTR12C:LTR:ERV1:+	0.36761
				L1PA3:LINE:L1:-	0.726768			LTR12C:LTR:ERV1:-	0.699434
				L1PA4:LINE:L1:+	0.408333			LTR12C:LTR:ERV1:-	0.911936
				L1PA3:LINE:L1:-	0.646939			LTR12C:LTR:ERV1:-	0.696508
				L1PA3:LINE:L1:+	0.8298			LTR12C:LTR:ERV1:+	0.43204
				L1PA3:LINE:L1:+	0.449325			LTR12C:LTR:ERV1:+	0.221828
				L1PA5:LINE:L1:+	0.363889			LTR12C:LTR:ERV1:+	0.0979386
				L1PA5:LINE:L1:-	0.151515			LTR12C:LTR:ERV1:+	0.430801
				L1PA2:LINE:L1:+	0.130159			LTR12C:LTR:ERV1:-	0.239314
				L1PA2:LINE:L1:+	0.328571			LTR12C:LTR:ERV1:+	0.731165
				L1PA3:LINE:L1:-	0.629978			LTR12C:LTR:ERV1:+	0.155568
				L1PA4:LINE:L1:-	0.0839466			LTR12C:LTR:ERV1:-	0.746091
				L1PA3:LINE:L1:-	0.521429			LTR12C:LTR:ERV1:-	0.357528
				L1PA5:LINE:L1:+	0.502698			LTR12C:LTR:ERV1:+	0.724462
				L1PA3:LINE:L1:+	0.63			LTR12C:LTR:ERV1:+	0.779102
				L1PA2:LINE:L1:+	0.156818			LTR12C:LTR:ERV1:-	0.788214
				L1PA8:LINE:L1:-	0.2375			LTR12C:LTR:ERV1:-	0.689758
				L1PA4:LINE:L1:+	0.471429			LTR12C:LTR:ERV1:-	0.78935
				L1PA2:LINE:L1:+	0.432011			LTR12C:LTR:ERV1:+	0.45881
				L1PA7:LINE:L1:+	0.736742			LTR12C:LTR:ERV1:+	0.0221861
				L1PA3:LINE:L1:+	0.514378			LTR12C:LTR:ERV1:+	0.607336
				L1PA5:LINE:L1:+	0.309014			LTR12C:LTR:ERV1:+	0.660498
				L1PA5:LINE:L1:+	0.510245			LTR12C:LTR:ERV1:+	0.216384
				L1PA8:LINE:L1:+	0.500198			LTR12C:LTR:ERV1:+	0.198407
				L1PA5:LINE:L1:+	0.549206			LTR12C:LTR:ERV1:+	0.232789
				L1PA2:LINE:L1:-	0.159199			LTR12C:LTR:ERV1:-	0.75824
				L1PA5:LINE:L1:-	0.552505			LTR12C:LTR:ERV1:+	0.389527
				L1PA6:LINE:L1:+	0.125677			LTR12C:LTR:ERV1:+	0.0505357
				L1PA4:LINE:L1:+	0.70318			LTR12C:LTR:ERV1:+	0.13455
				L1PA8A:LINE:L1:+	0.207143			LTR12C:LTR:ERV1:+	0.114193
				L1PA5:LINE:L1:-	0.532837			LTR12C:LTR:ERV1:-	0.00510204
				L1PA4:LINE:L1:+	0.450794			LTR12C:LTR:ERV1:-	0.490217
				L1PA6:LINE:L1:-	0.410823			LTR12E:LTR:ERV1:-	0.479076
				L1PA6:LINE:L1:+	0.234127			LTR12C:LTR:ERV1:+	0.397681
				L1PA3:LINE:L1:+	0.681566			LTR12:LTR:ERV1:+	0.638643
				L1PA5:LINE:L1:-	0.476515			LTR12C:LTR:ERV1:+	0.139901
				L1PA8:LINE:L1:+	0.336508			LTR12C:LTR:ERV1:+	0.160136
				L1PA8A:LINE:L1:+	0.319913			LTR12C:LTR:ERV1:+	0.737864
				L1PA3:LINE:L1:+	0.537179			LTR12C:LTR:ERV1:-	0.0763548
				L1PA3:LINE:L1:+	0.301992			LTR12C:LTR:ERV1:+	0.610204
				L1PA5:LINE:L1:+	0.721587			LTR12C:LTR:ERV1:-	0.358154
				L1PA4:LINE:L1:-	0.607692			LTR12C:LTR:ERV1:+	0.261693
				L1PA8:LINE:L1:+	0.219444			LTR12C:LTR:ERV1:+	0.418347
				L1PA3:LINE:L1:+	0.24119			LTR12C:LTR:ERV1:+	0.551058
				L1PA4:LINE:L1:-	0.219406			LTR12C:LTR:ERV1:+	0.27754
				L1PA4:LINE:L1:-	0.504762			LTR12C:LTR:ERV1:-	0.297354
				L1PA2:LINE:L1:-	0.351484			LTR12C:LTR:ERV1:-	0.139592
				L1PA2:LINE:L1:+	0.282269			LTR12C:LTR:ERV1:+	0.55358
				L1PA5:LINE:L1:+	0.489133			LTR12C:LTR:ERV1:+	0.416758
				L1PA7:LINE:L1:-	0.142341			LTR12C:LTR:ERV1:+	0.755408
				L1PA6:LINE:L1:+	0.283815			LTR12C:LTR:ERV1:-	0.768944
				L1PA2:LINE:L1:+	0.151123			LTR12C:LTR:ERV1:+	0.567134
				L1PA5:LINE:L1:+	0.574036			LTR12C:LTR:ERV1:+	0.671106
				L1PA5:LINE:L1:+	0.737425			LTR12C:LTR:ERV1:-	0.751066
				L1PA3:LINE:L1:-	0.107937			LTR12:LTR:ERV1:+	0.857203
				L1PA2:LINE:L1:-	0.100476			LTR12:LTR:ERV1:+	0.276862
				L1PA5:LINE:L1:-	0.782082			LTR12C:LTR:ERV1:-	0.708259
				L1PA6:LINE:L1:+	0.381305			LTR12C:LTR:ERV1:-	0.803786
				L1PA4:LINE:L1:+	0.47881			LTR12C:LTR:ERV1:+	0.303943
				L1PA4:LINE:L1:+	0.396492			LTR12C:LTR:ERV1:-	0.886841
				L1PA7:LINE:L1:+	0.275227			LTR12C:LTR:ERV1:-	0.765357
				L1PA5:LINE:L1:+	0.69133			LTR12C:LTR:ERV1:+	0.723382
				L1PA4:LINE:L1:-	0.607044			LTR12:LTR:ERV1:+	0.307359
				L1PA8A:LINE:L1:+	0.278644			LTR12C:LTR:ERV1:-	0.0600289
				L1PA5:LINE:L1:-	0.571769			LTR12C:LTR:ERV1:+	0.769111
				L1PA3:LINE:L1:-	0.481349			LTR12D:LTR:ERV1:+	0.726559
				L1PA7:LINE:L1:+	0.292923			LTR12D:LTR:ERV1:+	0.578016
				L1PA7:LINE:L1:-	0.235931			LTR12C:LTR:ERV1:+	0.695996
				L1PA7:LINE:L1:+	0.334392			LTR12E:LTR:ERV1:+	0.366697
				L1PA6:LINE:L1:-	0.37744			LTR12C:LTR:ERV1:+	0.58529
				L1PA4:LINE:L1:+	0.660498			LTR12C:LTR:ERV1:+	0.397411
				L1PA7:LINE:L1:+	0.697391			LTR12C:LTR:ERV1:-	0.518848
				L1PA2:LINE:L1:+	0.19697			LTR12C:LTR:ERV1:+	0.089881
				L1PA2:LINE:L1:+	0.382784			LTR12C:LTR:ERV1:-	0.289771
				L1PA2:LINE:L1:+	0.0910985			LTR12C:LTR:ERV1:+	0.177506
				L1PA7:LINE:L1:+	0.498557			LTR12C:LTR:ERV1:+	0.461723
				L1PA3:LINE:L1:+	0.511201			LTR12C:LTR:ERV1:-	0.834372
				L1PA3:LINE:L1:+	0.397924			LTR12C:LTR:ERV1:-	0.47564
				L1PA6:LINE:L1:-	0.333645			LTR12C:LTR:ERV1:-	0.399114
				L1PA6:LINE:L1:-	0.138889			LTR12C:LTR:ERV1:+	0.254195
				L1PA7:LINE:L1:-	0.22			LTR12C:LTR:ERV1:+	0.105729
				L1PB1:LINE:L1:-	0.0154762			LTR12C:LTR:ERV1:-	0.137272
				L1PA5:LINE:L1:+	0.560185			LTR12C:LTR:ERV1:+	0.734387
				L1PA7:LINE:L1:+	0.511329			LTR12C:LTR:ERV1:+	0.195476
				L1HS:LINE:L1:-	0.239646			LTR12C:LTR:ERV1:-	0.234757
				L1PA4:LINE:L1:+	0.63776			LTR12C:LTR:ERV1:+	0.295414
				L1PA5:LINE:L1:+	0.435147			LTR12C:LTR:ERV1:-	0.337285
				L1PA5:LINE:L1:+	0.651927			LTR12C:LTR:ERV1:-	0.712544
				L1PA5:LINE:L1:+	0.326623			LTR12C:LTR:ERV1:+	0.321672
				L1PA5:LINE:L1:-	0.783889			LTR12C:LTR:ERV1:+	0.198854
				L1PA2:LINE:L1:-	0.156803			LTR12C:LTR:ERV1:-	0.573515
				L1PA3:LINE:L1:-	0.419048			LTR12C:LTR:ERV1:-	0.00555556
				L1PA5:LINE:L1:-	0.569728			LTR12C:LTR:ERV1:-	0.340278
				L1PA3:LINE:L1:+	0.472144			LTR12C:LTR:ERV1:-	0.55471
				L1PA4:LINE:L1:+	0.672935			LTR12C:LTR:ERV1:-	0.61121
				L1PA5:LINE:L1:+	0.461927			LTR12C:LTR:ERV1:-	0.571305
				L1PA7:LINE:L1:-	0.677906			LTR12C:LTR:ERV1:+	0.661888
				L1PA3:LINE:L1:-	0.570556			LTR12C:LTR:ERV1:-	0.679067
				L1PA7:LINE:L1:+	0.358482			LTR12C:LTR:ERV1:-	0.814362
				L1PA2:LINE:L1:+	0.563195			LTR12C:LTR:ERV1:+	0.76999
				L1PA6:LINE:L1:+	0.448718			LTR12C:LTR:ERV1:-	0.00909091
				L1PA3:LINE:L1:-	0.334871			LTR12C:LTR:ERV1:+	0.593335
				L1PA2:LINE:L1:-	0.328283			LTR12C:LTR:ERV1:+	0.678095
				L1PA4:LINE:L1:+	0.430128			LTR12C:LTR:ERV1:-	0.614729
				L1PA8:LINE:L1:+	0.104412			LTR12C:LTR:ERV1:-	0.531931
				L1PA6:LINE:L1:+	0.637679			LTR12C:LTR:ERV1:+	0.238473
				L1PA2:LINE:L1:-	0.469597			LTR12C:LTR:ERV1:-	0.281255
				L1PA6:LINE:L1:+	0.415079			LTR12C:LTR:ERV1:-	0.199134
				L1PA6:LINE:L1:-	0.618615			LTR12C:LTR:ERV1:+	0.482043
				L1PA4:LINE:L1:+	0.540327			LTR12C:LTR:ERV1:-	0.782188
				L1PA3:LINE:L1:+	0.689418			LTR12C:LTR:ERV1:-	0.69645
				L1PA4:LINE:L1:-	0.559002			LTR12:LTR:ERV1:+	0.556432
				L1PA5:LINE:L1:-	0.241729			LTR12C:LTR:ERV1:+	0.408048
				L1PA7:LINE:L1:-	0.290909			LTR12C:LTR:ERV1:-	0.833333
				L1PA6:LINE:L1:+	0.377941			LTR12C:LTR:ERV1:-	0.449384
				L1PA7:LINE:L1:-	0.457619			LTR12C:LTR:ERV1:-	0.864994
				L1PA2:LINE:L1:-	0.475223			LTR12C:LTR:ERV1:+	0.599241
				L1PA4:LINE:L1:+	0.68619			LTR12C:LTR:ERV1:+	0.680061
				L1PA4:LINE:L1:+	0.703399			LTR12C:LTR:ERV1:+	0.677056
				L1PA5:LINE:L1:+	0.50463			LTR12C:LTR:ERV1:+	0.553226
				L1PA7:LINE:L1:+	0.183333			LTR12C:LTR:ERV1:+	0.56653
				L1PA5:LINE:L1:+	0.4005			LTR12C:LTR:ERV1:-	0.280889
				L1PA7:LINE:L1:+	0.343301			LTR12C:LTR:ERV1:+	0.360218
				L1PA4:LINE:L1:-	0.635813			LTR12C:LTR:ERV1:-	0.760498
				L1PB1:LINE:L1:+	0.258445			LTR12C:LTR:ERV1:+	0.738634
				L1PA7:LINE:L1:-	0.679221			LTR12C:LTR:ERV1:-	0.672776
				L1PA2:LINE:L1:+	0.368266			LTR12C:LTR:ERV1:+	0.520585
				L1PA2:LINE:L1:+	0.25625			LTR12C:LTR:ERV1:-	0.654384
				L1PA3:LINE:L1:-	0.590693			LTR12C:LTR:ERV1:+	0.189094
				L1PA5:LINE:L1:+	0.440907			LTR12C:LTR:ERV1:+	0.0409983
				L1PA6:LINE:L1:+	0.476422			LTR12C:LTR:ERV1:+	0.694725
				L1PA4:LINE:L1:-	0.460488			LTR12C:LTR:ERV1:-	0.575467
				L1PA4:LINE:L1:-	0.365476			LTR12C:LTR:ERV1:+	0.67528
				L1PA6:LINE:L1:-	0.489706			LTR12D:LTR:ERV1:-	0.543901
				L1PA3:LINE:L1:+	0.491076			LTR12C:LTR:ERV1:-	0.292517
				L1PA6:LINE:L1:-	0.312738			LTR12C:LTR:ERV1:+	0.157407
				L1PA4:LINE:L1:-	0.598571			LTR12D:LTR:ERV1:-	0.317809
				L1PA3:LINE:L1:+	0.463112			LTR12C:LTR:ERV1:+	0.40432
				L1PA6:LINE:L1:-	0.598571			LTR12C:LTR:ERV1:+	0.506111
				L1PA6:LINE:L1:-	0.496984			LTR12C:LTR:ERV1:-	0.481865
				L1HS:LINE:L1:-	0.407619			LTR12C:LTR:ERV1:-	0.651241
				L1PA2:LINE:L1:+	0.399134			LTR12C:LTR:ERV1:+	0.690902
				L1PA5:LINE:L1:-	0.473449			LTR12C:LTR:ERV1:+	0.180544
				L1PA3:LINE:L1:-	0.675214			LTR12C:LTR:ERV1:-	0.565322
				L1PA2:LINE:L1:-	0.156548			LTR12C:LTR:ERV1:+	0.0836957
				L1PA5:LINE:L1:+	0.254167			LTR12C:LTR:ERV1:-	0.73971
				L1PA3:LINE:L1:+	0.232778			LTR12C:LTR:ERV1:-	0.63287
				L1PA4:LINE:L1:+	0.629018			LTR12C:LTR:ERV1:-	0.656784
				L1PA3:LINE:L1:+	0.647222			LTR12C:LTR:ERV1:+	0.202334
				L1PA8A:LINE:L1:+	0.258433			LTR12C:LTR:ERV1:+	0.469597
				L1PA4:LINE:L1:+	0.682725			LTR12C:LTR:ERV1:+	0.0868056
				L1PA2:LINE:L1:-	0.398578			LTR12D:LTR:ERV1:-	0.669508
				L1PA3:LINE:L1:+	0.414984			LTR12C:LTR:ERV1:-	0.0535917
				L1PA6:LINE:L1:-	0.532175			LTR12:LTR:ERV1:+	0.161429
				L1PREC2:LINE:L1:+	0.615823			LTR12D:LTR:ERV1:+	0.374641
				L1PA4:LINE:L1:+	0.543661			LTR12C:LTR:ERV1:-	0.777066
				L1PA3:LINE:L1:+	0.0633826			LTR12C:LTR:ERV1:+	0.631595
				L1PA2:LINE:L1:+	0.157671			LTR12C:LTR:ERV1:+	0.195864
				L1PA5:LINE:L1:+	0.493651			LTR12C:LTR:ERV1:+	0.0427984
				L1PA6:LINE:L1:+	0.406133			LTR12D:LTR:ERV1:+	0.856721
				L1PA5:LINE:L1:+	0.664277			LTR12C:LTR:ERV1:+	0.578095
				L1PA6:LINE:L1:+	0.4042			LTR12C:LTR:ERV1:+	0.543595
				L1PA3:LINE:L1:-	0.61503			LTR12D:LTR:ERV1:-	0.628869
				L1PA5:LINE:L1:-	0.740804			LTR12C:LTR:ERV1:-	0.795055
				L1PA7:LINE:L1:-	0.355258			LTR12C:LTR:ERV1:-	0.897727
				L1PA6:LINE:L1:-	0.725694			LTR12C:LTR:ERV1:-	0.625841
				L1PA5:LINE:L1:+	0.562454			LTR12C:LTR:ERV1:-	0.728508
				L1PA8:LINE:L1:+	0.345421			LTR12C:LTR:ERV1:-	0.816497
				L1PA4:LINE:L1:-	0.648314			LTR12C:LTR:ERV1:-	0.287546
				L1PA3:LINE:L1:-	0.754571			LTR12C:LTR:ERV1:-	0.0168067
				L1PA7:LINE:L1:-	0.191799			LTR12C:LTR:ERV1:+	0.326406
				L1PA4:LINE:L1:+	0.611349			LTR12C:LTR:ERV1:-	0.586275
				L1PA2:LINE:L1:+	0.16706			LTR12C:LTR:ERV1:-	0.148602
				L1PA4:LINE:L1:-	0.612381			LTR12C:LTR:ERV1:-	0.163755
				L1PA2:LINE:L1:-	0.444114			LTR12C:LTR:ERV1:-	0.118519
				L1PA5:LINE:L1:-	0.359663			LTR12C:LTR:ERV1:-	0.0180451
				L1PA4:LINE:L1:-	0.413214			LTR12C:LTR:ERV1:+	0.166716
				L1PA2:LINE:L1:+	0.0496732			LTR12C:LTR:ERV1:+	0.134909
				L1PA3:LINE:L1:+	0.230769			LTR12C:LTR:ERV1:+	0.116058
				L1PA2:LINE:L1:+	0.301732			LTR12C:LTR:ERV1:-	0.203333
				L1PA4:LINE:L1:+	0.579365			LTR12C:LTR:ERV1:-	0.753392
				L1PA7:LINE:L1:+	0.218021			LTR12C:LTR:ERV1:-	0.720421
				L1PA5:LINE:L1:+	0.513233			LTR12C:LTR:ERV1:+	0.0615385
				L1PA4:LINE:L1:-	0.730981			LTR12:LTR:ERV1:+	0.24258
				L1PA5:LINE:L1:-	0.469457			LTR12C:LTR:ERV1:-	0.110714
				L1PA4:LINE:L1:+	0.493333			LTR12C:LTR:ERV1:-	0.785909
				L1PA5:LINE:L1:-	0.561039			LTR12C:LTR:ERV1:+	0.721723
				L1PA7:LINE:L1:+	0.416786			LTR12C:LTR:ERV1:-	0.0963785
				L1PA3:LINE:L1:+	0.0666667			LTR12:LTR:ERV1:+	0.748844
				L1PA7:LINE:L1:+	0.214286			LTR12C:LTR:ERV1:+	0.177249
				L1PA5:LINE:L1:-	0.6322			LTR12C:LTR:ERV1:-	0.0500639
				L1PA3:LINE:L1:-	0.184444			LTR12C:LTR:ERV1:-	0.53642
				L1PA2:LINE:L1:+	0.216891			LTR12C:LTR:ERV1:+	0.0454696
				L1PA4:LINE:L1:+	0.604575			LTR12C:LTR:ERV1:+	0.0753968
				L1PA4:LINE:L1:-	0.647778			LTR12C:LTR:ERV1:+	0.058189
				L1PA2:LINE:L1:+	0.286905			LTR12C:LTR:ERV1:-	0.0576871
				L1PA2:LINE:L1:-	0.340476			LTR12C:LTR:ERV1:+	0.0979392
				L1PA5:LINE:L1:+	0.44256			LTR12C:LTR:ERV1:+	0.15836
				L1PA2:LINE:L1:+	0.446337			LTR12C:LTR:ERV1:+	0.176134
				L1P1:LINE:L1:+	0.543856			LTR12C:LTR:ERV1:+	0.0166667
				L1PA7:LINE:L1:+	0.137525			LTR12E:LTR:ERV1:-	0.132685
				L1PA6:LINE:L1:-	0.211039			LTR12C:LTR:ERV1:+	0.340697
				L1PA4:LINE:L1:+	0.738194			LTR12C:LTR:ERV1:-	0.175507
				L1PA3:LINE:L1:-	0.776961			LTR12C:LTR:ERV1:+	0.241981
				L1PA6:LINE:L1:-	0.771032			LTR12C:LTR:ERV1:+	0.035119
				L1PA3:LINE:L1:-	0.497711			LTR12C:LTR:ERV1:+	0.426328
				L1PA7:LINE:L1:-	0.128912			LTR12C:LTR:ERV1:-	0
				L1PA3:LINE:L1:-	0.538228			LTR12C:LTR:ERV1:-	0.0321248
				L1PA3:LINE:L1:+	0.49881			LTR12C:LTR:ERV1:-	0.076
				L1PA2:LINE:L1:-	0.5225			LTR12C:LTR:ERV1:-	0.0643939
				L1PA5:LINE:L1:+	0.521212			LTR12:LTR:ERV1:+	0.815833
				L1PA3:LINE:L1:+	0.662963			LTR12C:LTR:ERV1:+	0.0309524
				L1PA5:LINE:L1:+	0.679628			LTR12C:LTR:ERV1:-	0.352747
				L1PA5:LINE:L1:+	0.648348			LTR12C:LTR:ERV1:+	0.144063
				L1PA3:LINE:L1:-	0.558442			LTR12C:LTR:ERV1:+	0.649242
				L1PA8A:LINE:L1:+	0.61632			LTR12C:LTR:ERV1:+	0.0616246
				L1PA5:LINE:L1:+	0.518581			LTR12C:LTR:ERV1:+	0.0181052
				L1PA5:LINE:L1:+	0.499145			LTR12C:LTR:ERV1:+	0.741667
				L1PA6:LINE:L1:+	0.500926			LTR12C:LTR:ERV1:+	0.136136
				L1PA4:LINE:L1:+	0.636103			LTR12C:LTR:ERV1:-	0.571279
				L1PA5:LINE:L1:+	0.665171			LTR12C:LTR:ERV1:-	0.708002
				L1P2:LINE:L1:+	0.354067			LTR12C:LTR:ERV1:-	0.722348
				L1PA5:LINE:L1:+	0.549492			LTR12C:LTR:ERV1:+	0.0823683
				L1PA7:LINE:L1:+	0.04			LTR12C:LTR:ERV1:-	0.772842
				L1PA3:LINE:L1:+	0.536984			LTR12C:LTR:ERV1:+	0.421023
				L1PA4:LINE:L1:+	0.489644			LTR12C:LTR:ERV1:+	0.620768
				L1PA5:LINE:L1:-	0.592496			LTR12C:LTR:ERV1:+	0.319219
				L1PA6:LINE:L1:+	0.419722			LTR12C:LTR:ERV1:+	0.378253
				L1PA5:LINE:L1:-	0.595798			LTR12C:LTR:ERV1:+	0.379079
				L1PA4:LINE:L1:+	0.766086			LTR12C:LTR:ERV1:-	0.278581
				L1PA4:LINE:L1:-	0.482209			LTR12C:LTR:ERV1:-	0.379527
				L1PA6:LINE:L1:-	0.270805			LTR12C:LTR:ERV1:+	0.38576
				L1PA5:LINE:L1:-	0.263492			LTR12C:LTR:ERV1:+	0.0214286
				L1PA4:LINE:L1:-	0.769048			LTR12C:LTR:ERV1:-	0.22971
				L1PA4:LINE:L1:+	0.852778			LTR12D:LTR:ERV1:-	0.124242
				L1PA4:LINE:L1:-	0.624132			LTR12C:LTR:ERV1:+	0.378615
				L1PA4:LINE:L1:-	0.523529			LTR12C:LTR:ERV1:+	0.186688
				L1PA4:LINE:L1:+	0.572917			LTR12C:LTR:ERV1:-	0.746336
				L1PA2:LINE:L1:-	0			LTR12C:LTR:ERV1:+	0.548354
				L1HS:LINE:L1:-	0.0753444			LTR12:LTR:ERV1:+	0.425549
				L1PA7:LINE:L1:+	0.395779			LTR12C:LTR:ERV1:+	0.576049
				L1PA4:LINE:L1:+	0.663842			LTR12E:LTR:ERV1:+	0.325882
				L1PA2:LINE:L1:+	0.265447			LTR12C:LTR:ERV1:-	0.797801
				L1PA5:LINE:L1:-	0.311451			LTR12C:LTR:ERV1:-	0.309599
				L1PA3:LINE:L1:-	0.566395			LTR12C:LTR:ERV1:+	0.359485
				L1PA5:LINE:L1:+	0.379444			LTR12C:LTR:ERV1:+	0.72619
				L1PA3:LINE:L1:+	0.409524			LTR12C:LTR:ERV1:+	0.53587
				L1PA2:LINE:L1:+	0.506508			LTR12C:LTR:ERV1:+	0.135852
				L1PA4:LINE:L1:-	0.743651			LTR12D:LTR:ERV1:+	0.105037
				L1PA5:LINE:L1:+	0.507018			LTR12C:LTR:ERV1:+	0.389622
				L1PA5:LINE:L1:-	0.498571			LTR12C:LTR:ERV1:-	0.0125
				L1PA6:LINE:L1:-	0.0389924			LTR12C:LTR:ERV1:-	0.293115
				L1PA3:LINE:L1:+	0.630952			LTR12C:LTR:ERV1:+	0.0966652
				L1PA3:LINE:L1:-	0.614332			LTR12E:LTR:ERV1:+	0.0123035
				L1PA4:LINE:L1:-	0.588214			LTR12D:LTR:ERV1:+	0.79697
				L1PA5:LINE:L1:+	0.685799			LTR12C:LTR:ERV1:-	0.845162
				L1PA5:LINE:L1:+	0.42601			LTR12C:LTR:ERV1:+	0.203709
				L1PA6:LINE:L1:+	0.251065			LTR12C:LTR:ERV1:+	0.224562
				L1PA7:LINE:L1:-	0.650794			LTR12C:LTR:ERV1:-	0.223377
				L1PA4:LINE:L1:-	0.477354			LTR12C:LTR:ERV1:-	0.639479
				L1PA6:LINE:L1:-	0.636574			LTR12C:LTR:ERV1:+	0.117645
				L1PA5:LINE:L1:+	0.621587			LTR12C:LTR:ERV1:+	0.0569909
				L1PA5:LINE:L1:+	0.468687			LTR12C:LTR:ERV1:-	0.541798
				L1PA4:LINE:L1:+	0.607292			LTR12C:LTR:ERV1:+	0.787219
				L1PA2:LINE:L1:-	0.24			LTR12C:LTR:ERV1:+	0.841775
				L1PA3:LINE:L1:+	0.30119			LTR12C:LTR:ERV1:+	0.834396
				L1PA5:LINE:L1:-	0.617464			LTR12C:LTR:ERV1:+	0.0311454
				L1PA5:LINE:L1:-	0.587594			LTR12C:LTR:ERV1:-	0.246449
				L1PA2:LINE:L1:+	0.153634			LTR12C:LTR:ERV1:-	0.731234
				L1PA4:LINE:L1:-	0.737821			LTR12D:LTR:ERV1:-	0.612973
				L1PA4:LINE:L1:+	0.630599			LTR12C:LTR:ERV1:+	0.78118
				L1PA5:LINE:L1:-	0.522432			LTR12C:LTR:ERV1:-	0.846805
				L1PA6:LINE:L1:+	0.454545			LTR12C:LTR:ERV1:+	0.603618
				L1PA3:LINE:L1:+	0.727778			LTR12C:LTR:ERV1:-	0.287707
				L1PA5:LINE:L1:-	0.616126			LTR12C:LTR:ERV1:-	0.347884
				L1PA6:LINE:L1:-	0.342698			LTR12D:LTR:ERV1:+	0.185065
				L1PA5:LINE:L1:-	0.809143			LTR12C:LTR:ERV1:+	0.0303658
				L1PA4:LINE:L1:-	0.379339			LTR12C:LTR:ERV1:-	0.533257
				L1PA3:LINE:L1:+	0.691429			LTR12C:LTR:ERV1:-	0.10832
				L1PA6:LINE:L1:+	0.226116			LTR12_:LTR:ERV1:+	0.249737
				L1PA5:LINE:L1:-	0.59021			LTR12C:LTR:ERV1:+	0.211614
				L1PA4:LINE:L1:-	0.595556			LTR12C:LTR:ERV1:+	0.199559
				L1PA3:LINE:L1:-	0.573617			LTR12C:LTR:ERV1:-	0.153869
				L1PA4:LINE:L1:+	0.275			LTR12C:LTR:ERV1:+	0.0294444
				L1PA4:LINE:L1:+	0.760883			LTR12C:LTR:ERV1:+	0.18515
				L1PA7:LINE:L1:+	0.470794			LTR12C:LTR:ERV1:-	0.484081
				L1PA4:LINE:L1:+	0.549887			LTR12C:LTR:ERV1:+	0.668056
				L1PA5:LINE:L1:-	0.332051			LTR12D:LTR:ERV1:+	0.21958
				L1PA3:LINE:L1:+	0.350198			LTR12C:LTR:ERV1:+	0.55724
				L1PA3:LINE:L1:+	0.470833			LTR12C:LTR:ERV1:-	0.445179
				L1PA4:LINE:L1:-	0.547396			LTR12C:LTR:ERV1:+	0.0715454
				L1PA3:LINE:L1:+	0.525276			LTR12C:LTR:ERV1:-	0.0502806
				L1PA4:LINE:L1:-	0.359341			LTR12C:LTR:ERV1:-	0.751135
				L1PA3:LINE:L1:-	0.790104			LTR12C:LTR:ERV1:-	0.593141
				L1PA3:LINE:L1:-	0.798591			LTR12C:LTR:ERV1:-	0.451704
				L1PA2:LINE:L1:-	0.498881			LTR12C:LTR:ERV1:+	0.714978
				L1PA7:LINE:L1:+	0.561111			LTR12C:LTR:ERV1:-	0.0769484
				L1PA4:LINE:L1:-	0.562771			LTR12C:LTR:ERV1:-	0.580871
				L1PA2:LINE:L1:+	0.400119			LTR12C:LTR:ERV1:-	0.444821
				L1PA3:LINE:L1:+	0.186032			LTR12C:LTR:ERV1:+	0.279654
				L1PA4:LINE:L1:-	0.685118			LTR12C:LTR:ERV1:+	0.54924
				L1PA5:LINE:L1:-	0.564569			LTR12C:LTR:ERV1:+	0.132072
				L1PA2:LINE:L1:-	0.110417			LTR12C:LTR:ERV1:+	0.750119
				L1PA6:LINE:L1:-	0.11			LTR12C:LTR:ERV1:+	0.22059
				L1PA6:LINE:L1:+	0.196681			LTR12C:LTR:ERV1:-	0.115079
				L1PA5:LINE:L1:+	0.511901			LTR12C:LTR:ERV1:+	0.241103
				L1PA6:LINE:L1:-	0.533214			LTR12C:LTR:ERV1:+	0.364544
				L1PA6:LINE:L1:+	0.562771			LTR12E:LTR:ERV1:-	0.17619
				L1PA3:LINE:L1:+	0.580305			LTR12C:LTR:ERV1:-	0.82189
				L1PA5:LINE:L1:-	0.588294			LTR12_:LTR:ERV1:+	0.406349
				L1PA3:LINE:L1:+	0.483338			LTR12E:LTR:ERV1:+	0.355172
				L1PA5:LINE:L1:-	0.553535			LTR12C:LTR:ERV1:-	0.457576
				L1PA5:LINE:L1:+	0.513971			LTR12C:LTR:ERV1:-	0.672112
				L1PA4:LINE:L1:-	0.484474			LTR12E:LTR:ERV1:-	0.694246
				L1PA4:LINE:L1:+	0.476616			LTR12C:LTR:ERV1:+	0.404288
				L1PA4:LINE:L1:-	0.64246			LTR12C:LTR:ERV1:+	0.589725
				L1PA4:LINE:L1:+	0.635913			LTR12C:LTR:ERV1:+	0.632859
				L1PA3:LINE:L1:+	0.430238			LTR12C:LTR:ERV1:-	0.80144
				L1PA2:LINE:L1:-	0.667567			LTR12D:LTR:ERV1:+	0.0227273
				L1PA6:LINE:L1:+	0.575132			LTR12C:LTR:ERV1:-	0.724113
				L1PA3:LINE:L1:+	0.72695			LTR12C:LTR:ERV1:-	0.37803
				L1PA5:LINE:L1:-	0.569048			LTR12C:LTR:ERV1:+	0.558285
				L1PA5:LINE:L1:-	0.447778			LTR12D:LTR:ERV1:+	0.720816
				L1PA3:LINE:L1:-	0.452007			LTR12D:LTR:ERV1:+	0.61875
				L1PA3:LINE:L1:-	0.503333			LTR12C:LTR:ERV1:-	0.280142
				L1PA3:LINE:L1:-	0.388435			LTR12C:LTR:ERV1:-	0.205754
				L1PA2:LINE:L1:-	0.387049			LTR12C:LTR:ERV1:-	0.745944
				L1PA3:LINE:L1:+	0.36045			LTR12C:LTR:ERV1:-	0.18545
				L1PA4:LINE:L1:-	0.674858			LTR12C:LTR:ERV1:+	0.296644
				L1PA5:LINE:L1:-	0.40381			LTR12C:LTR:ERV1:+	0.645115
				L1PA4:LINE:L1:-	0.770794			LTR12C:LTR:ERV1:-	0.461905
				L1PA5:LINE:L1:+	0.743037			LTR12C:LTR:ERV1:-	0.115
				L1PA4:LINE:L1:-	0.633333			LTR12C:LTR:ERV1:+	0.424049
				L1PA5:LINE:L1:-	0.603387			LTR12C:LTR:ERV1:+	0.196108
				L1PA4:LINE:L1:-	0.316476			LTR12C:LTR:ERV1:-	0.834206
				L1PA3:LINE:L1:-	0.465476			LTR12E:LTR:ERV1:-	0.516936
				L1PA2:LINE:L1:-	0.634829			LTR12C:LTR:ERV1:+	0.42811
				L1PA5:LINE:L1:-	0.765714			LTR12C:LTR:ERV1:-	0.588804
				L1PA4:LINE:L1:-	0.664619			LTR12C:LTR:ERV1:-	0.747305
				L1PA4:LINE:L1:-	0.556758			LTR12C:LTR:ERV1:-	0.600911
				L1PA3:LINE:L1:-	0.583333			LTR12C:LTR:ERV1:+	0.537071
				L1PA4:LINE:L1:+	0.477778			LTR12C:LTR:ERV1:+	0.740368
				L1PA4:LINE:L1:-	0.796599			LTR12C:LTR:ERV1:-	0.491005
				L1PA5:LINE:L1:+	0.259405			LTR12C:LTR:ERV1:+	0.786691
				L1PA7:LINE:L1:-	0.194517			LTR12C:LTR:ERV1:-	0.163265
				L1PA3:LINE:L1:+	0.635556			LTR12C:LTR:ERV1:-	0.17346
				L1PA4:LINE:L1:+	0.726851			LTR12C:LTR:ERV1:-	0.313831
				L1PA8:LINE:L1:-	0.583007			LTR12D:LTR:ERV1:+	0.291093
				L1PA4:LINE:L1:-	0.689306			LTR12C:LTR:ERV1:-	0.813578
				L1PA4:LINE:L1:-	0.538034			LTR12C:LTR:ERV1:+	0
				L1PA4:LINE:L1:+	0.451701			LTR12C:LTR:ERV1:+	0.511204
				L1PA4:LINE:L1:+	0.454444			LTR12C:LTR:ERV1:-	0.0375079
				L1PA4:LINE:L1:+	0.223779			LTR12C:LTR:ERV1:-	0.0323232
				L1PA4:LINE:L1:-	0.57417			LTR12C:LTR:ERV1:-	0.731061
				L1PA3:LINE:L1:-	0.651984			LTR12E:LTR:ERV1:-	0.720728
				L1PA4:LINE:L1:-	0.15			LTR12C:LTR:ERV1:+	0.241026
				L1PA3:LINE:L1:+	0.458774			LTR12D:LTR:ERV1:-	0.171905
				L1PA2:LINE:L1:-	0.142857			LTR12C:LTR:ERV1:-	0.0333333
				L1PA3:LINE:L1:+	0.654963			LTR12C:LTR:ERV1:-	0.306819
				L1PA3:LINE:L1:+	0.496131			LTR12C:LTR:ERV1:+	0.562286
				L1PA3:LINE:L1:-	0.127619			LTR12E:LTR:ERV1:+	0.122035
				L1PA7:LINE:L1:-	0.512381			LTR12C:LTR:ERV1:-	0.596537
				L1PA3:LINE:L1:-	0.684594			LTR12C:LTR:ERV1:+	0.149928
				L1PA3:LINE:L1:+	0.337719			LTR12C:LTR:ERV1:+	0.0343159
				L1PA5:LINE:L1:-	0.399231			LTR12C:LTR:ERV1:-	0.143984
				L1PA3:LINE:L1:+	0.671548			LTR12C:LTR:ERV1:+	0.332475
				L1PA7:LINE:L1:-	0.420105			LTR12C:LTR:ERV1:+	0.171078
				L1PA6:LINE:L1:-	0.50303			LTR12C:LTR:ERV1:-	0.591353
				L1PA2:LINE:L1:-	0.271062			LTR12C:LTR:ERV1:+	0.588771
				L1PA4:LINE:L1:+	0.464187			LTR12C:LTR:ERV1:-	0.27684
				L1PA7:LINE:L1:+	0.292163			LTR12C:LTR:ERV1:+	0.690966
				L1PA5:LINE:L1:-	0.213339			LTR12C:LTR:ERV1:+	0.107782
				L1P1:LINE:L1:+	0.624762			LTR12C:LTR:ERV1:+	0.617971
				L1PA2:LINE:L1:-	0.607071			LTR12C:LTR:ERV1:+	0.0626347
				L1PA6:LINE:L1:-	0.625952			LTR12C:LTR:ERV1:-	0.054494
				L1PA3:LINE:L1:-	0.672619			LTR12C:LTR:ERV1:-	0.410415
				L1PA3:LINE:L1:+	0.463333			LTR12C:LTR:ERV1:-	0.021978
				L1PA3:LINE:L1:+	0.379679			LTR12C:LTR:ERV1:-	0.526831
				L1PA3:LINE:L1:+	0.726032			LTR12C:LTR:ERV1:+	0.0994814
				L1PA2:LINE:L1:+	0.369388			LTR12C:LTR:ERV1:-	0.161161
				L1PA7:LINE:L1:+	0.249524			LTR12D:LTR:ERV1:-	0.865468
				L1PA3:LINE:L1:-	0.0946429			LTR12C:LTR:ERV1:-	0.0210956
				L1PA5:LINE:L1:+	0.509807			LTR12C:LTR:ERV1:-	0.709778
				L1PA6:LINE:L1:+	0.404221			LTR12C:LTR:ERV1:+	0.105999
				L1PA6:LINE:L1:-	0.0474679			LTR12D:LTR:ERV1:-	0.729768
				L1PA3:LINE:L1:-	0.278665			LTR12D:LTR:ERV1:-	0.173333
				L1PA4:LINE:L1:+	0.479286			LTR12C:LTR:ERV1:+	0.319762
				L1PA6:LINE:L1:-	0.533333			LTR12C:LTR:ERV1:+	0.124365
				L1PA5:LINE:L1:+	0.618413			LTR12C:LTR:ERV1:+	0.398927
				L1PA4:LINE:L1:+	0.440774			LTR12C:LTR:ERV1:+	0.181617
				L1PA3:LINE:L1:-	0.552158			LTR12C:LTR:ERV1:+	0.0722496
				L1PA5:LINE:L1:+	0.369631			LTR12C:LTR:ERV1:+	0.517252
				L1PA4:LINE:L1:+	0.637075			LTR12C:LTR:ERV1:+	0.417645
				L1PA6:LINE:L1:-	0.214141			LTR12C:LTR:ERV1:-	0.190414
				L1PA6:LINE:L1:+	0.740627			LTR12C:LTR:ERV1:-	0.81067
				L1PA6:LINE:L1:+	0.358995			LTR12C:LTR:ERV1:+	0.661811
				L1PA7:LINE:L1:+	0.533333			LTR12C:LTR:ERV1:-	0.770084
				L1PA7:LINE:L1:-	0.461538			LTR12C:LTR:ERV1:+	0.657269
				L1PA3:LINE:L1:-	0.622992			LTR12C:LTR:ERV1:-	0.269004
				L1PA3:LINE:L1:-	0.131111			LTR12C:LTR:ERV1:+	0.129885
				L1PA8:LINE:L1:-	0.408234			LTR12_:LTR:ERV1:+	0.428591
				L1PA2:LINE:L1:+	0.302817			LTR12C:LTR:ERV1:+	0.284034
				L1PA3:LINE:L1:+	0.488281			LTR12C:LTR:ERV1:+	0.232631
				L1PA7:LINE:L1:-	0.17013			LTR12C:LTR:ERV1:-	0.159503
				L1PA3:LINE:L1:+	0.262169			LTR12C:LTR:ERV1:-	0.189835
				L1PA5:LINE:L1:+	0.456952			LTR12C:LTR:ERV1:+	0.0978571
				L1PA4:LINE:L1:+	0.611176			LTR12C:LTR:ERV1:-	0.157005
				L1PA2:LINE:L1:+	0.102381			LTR12C:LTR:ERV1:+	0.142851
				L1PA6:LINE:L1:-	0.315			LTR12C:LTR:ERV1:+	0.562976
				L1PA5:LINE:L1:+	0.508333			LTR12C:LTR:ERV1:+	0.414517
				L1PA3:LINE:L1:-	0.187738			LTR12C:LTR:ERV1:-	0.39945
				L1PA2:LINE:L1:-	0.554058			LTR12C:LTR:ERV1:+	0.269178
				L1PA3:LINE:L1:-	0.534307			LTR12D:LTR:ERV1:-	0.258211
				L1PA4:LINE:L1:+	0.458631			LTR12C:LTR:ERV1:+	0.0190392
				L1PA2:LINE:L1:-	0.566964			LTR12:LTR:ERV1:+	0.768925
				L1PA4:LINE:L1:+	0.647403			LTR12C:LTR:ERV1:+	0.582612
				L1PA2:LINE:L1:+	0.406527			LTR12C:LTR:ERV1:-	0.458303
				L1PA6:LINE:L1:+	0.297778			LTR12C:LTR:ERV1:-	0.239859
				L1PA2:LINE:L1:+	0.10125			LTR12C:LTR:ERV1:+	0.890166
				L1HS:LINE:L1:+	0.194444			LTR12D:LTR:ERV1:-	0.721119
				L1PA3:LINE:L1:-	0.553288			LTR12D:LTR:ERV1:-	0.896685
				L1PA3:LINE:L1:+	0.515598			LTR12C:LTR:ERV1:-	0.585018
				L1PA4:LINE:L1:+	0.417063			LTR12C:LTR:ERV1:-	0.689758
				L1PA4:LINE:L1:+	0.67026			LTR12D:LTR:ERV1:-	0
				L1PA5:LINE:L1:+	0.605357			LTR12C:LTR:ERV1:-	0.0900398
				L1PA4:LINE:L1:+	0.499242			LTR12C:LTR:ERV1:-	0.16337
				L1PA5:LINE:L1:+	0.425694			LTR12C:LTR:ERV1:-	0.162686
				L1PA3:LINE:L1:-	0.568135			LTR12E:LTR:ERV1:-	0.521801
				L1PA3:LINE:L1:-	0.0742857			LTR12:LTR:ERV1:+	0.428651
				L1PA2:LINE:L1:+	0.158377			LTR12C:LTR:ERV1:+	0.748094
				L1PA3:LINE:L1:+	0.598179			LTR12C:LTR:ERV1:+	0.073277
				L1PA6:LINE:L1:-	0.44			LTR12C:LTR:ERV1:+	0.0962265
				L1PA6:LINE:L1:-	0.170295			LTR12C:LTR:ERV1:+	0.320096
				L1PA6:LINE:L1:-	0.298535			LTR12C:LTR:ERV1:+	0.112153
				L1PA5:LINE:L1:+	0.698232			LTR12C:LTR:ERV1:+	0.439314
				L1PA2:LINE:L1:+	0.147754			LTR12C:LTR:ERV1:+	0.055539
				L1PA3:LINE:L1:-	0.687361			LTR12C:LTR:ERV1:+	0.727868
				L1PA2:LINE:L1:+	0.673077			LTR12C:LTR:ERV1:+	0.256116
[truncated: 1,350 more rows]

## Sheet: Sheet3
Figure1-source data 3: Raw. Bar graphs showing the fraction of “Low”, “Medium” and “High” methylated class of each retroelement type in male hPGCs at 19 weeks of gestation.
Fig. 1F	Low	Medium	High
SVA_A	8	26	47
SVA_B	135	112	33
SVA_C	84	69	22
SVA_D	434	200	28
SVA_E	11	4	1
SVA_F	48	20	6
Fig. 1G	Low	Medium	High
L1HS	10	24	2
L1PA2	112	225	53
L1PA3	68	419	258
L1PA4	17	456	276
L1PA5	26	394	177
L1PA6	70	259	49
L1PA7	113	196	18
L1PA8	20	35	3
Fig. 1H	Low	Medium	High
LTR12	4	32	14
LTR12C	658	783	613
LTR12D	35	62	33
LTR12E	20	14	12
LTR12F	0	3	1

## Sheet: Sheet4
Figure 1-figure supplement 1-source data 1: Raw. A WGBS read mappability.
chr	start	end	rep	Type	MapRate
chr3	110213561	110219422	L1PA7	L1PA7	0.922236
chrX	125278956	125285430	L1PA10	L1PA10	0.998431
chr19	22882602	22884139	SVA_C	SVA_C	0.617954
chr13	41461715	41467236	L1PA5	L1PA5	0.500092
chr20	37035520	37036997	SVA_B	SVA_B	0.715323
chr2	95908561	95910103	SVA_D	SVA_D	0.297503
chr3	88352345	88353485	SVA_A	SVA_A	0.693269
chr8	52404857	52410998	L1PA4	L1PA4	0.48237
chr2	154216507	154222931	L1PA8	L1PA8	0.988299
chr1	222222906	222224331	LTR12C	LTR12C	0.807547
chr17	46180360	46180940	LTR12F	LTR12F	0.997917
chr3	20820345	20827220	L1PA14	L1PA14	1.00015
chr4	62620336	62626523	L1PA4	L1PA4	0.524396
chr3	151645760	151647257	LTR12C	LTR12C	0.782391
chr8	70166454	70172484	L1PA2	L1PA2	0.139966
chr11	113094669	113100816	L1PA5	L1PA5	0.448156
chr10	103795136	103796643	SVA_C	SVA_C	0.48543
chr1	163994167	163994671	LTR12F	LTR12F	1.00248
chrX	128486184	128491941	L1PA5	L1PA5	0.448648
chr6	137453772	137460962	L1MA9	L1MA9	1.00014
chr4	69059776	69065922	L1PA2	L1PA2	0.367516
chr6	142238000	142244017	L1PA2	L1PA2	0.218016
chr20	5432972	5434810	SVA_A	SVA_A	0.559839
chr1	187672563	187673985	LTR12C	LTR12C	0.719365
chr7	8279058	8285203	L1PA6	L1PA6	0.684864
chr7	90359189	90365596	L1PA7	L1PA7	0.8925
chr6_ssto_hap7	3699431	3701364	SVA_D	SVA_D	0.0185488
chr1	45546938	45548015	SVA_D	SVA_D	0.193449
chrX	56515966	56522017	L1PA6	L1PA6	0.917325
chr4	48053971	48059991	L1HS	L1HS	0.0285473
chr4	58583858	58584543	LTR12B	LTR12B	1.00171
chr6	107405528	107406583	LTR12	LTR12	0.931937
chr6	106300985	106302823	SVA_D	SVA_D	0.401036
chr12	17852312	17857928	L1PA4	L1PA4	0.505801
chr12	34761441	34767589	L1PA3	L1PA3	0.589947
chr4	84873341	84879358	L1PA3	L1PA3	0.264492
chr21	15464389	15465856	LTR12C	LTR12C	0.850768
chr12	33882548	33883036	LTR12F	LTR12F	1.00258
chr6	2860194	2861967	LTR12C	LTR12C	0.543933
chr4	107012544	107014113	LTR12C	LTR12C	0.69435
chr13	102720640	102722186	LTR12C	LTR12C	0.697095
chr5	96849629	96855647	L1PA2	L1PA2	0.171004
chr12	97004189	97010297	L1PA5	L1PA5	0.510486
chr6_mcf_hap5	2603153	2608936	L1PA6	L1PA6	0.0515573
chr1	69582742	69586194	L1PA2	L1PA2	0.240453
chr22	45832424	45833518	LTR12C	LTR12C	0.609658
chr8	723346	729366	L1PA2	L1PA2	0.230236
chr6_dbb_hap3	3814169	3815800	SVA_D	SVA_D	0.399739
chr14	43714930	43715742	LTR12	LTR12	0.938202
chr12	26463285	26469695	L1PA8	L1PA8	0.922187
chr4	173289748	173291176	LTR12C	LTR12C	0.901355
chr12	62854177	62855578	LTR12C	LTR12C	0.763259
chr4	184739256	184740749	SVA_C	SVA_C	0.592965
chr11	129208810	129214797	L1PA3	L1PA3	0.221335
chr11	17050037	17056202	L1PA2	L1PA2	0.308821
chr5	97053496	97059599	L1PA4	L1PA4	0.613693
chr10	96865055	96871181	L1PA6	L1PA6	0.84849
chr13	92454347	92454983	LTR12_	LTR12_	0.921642
chr13	95178905	95185052	L1PA6	L1PA6	0.787663
chr8	57933761	57935734	SVA_D	SVA_D	0.709557
chr7	32244947	32245640	LTR12_	LTR12_	0.908938
chr11	57710663	57712104	SVA_B	SVA_B	0.474273
chr13	92948734	92950300	LTR12C	LTR12C	0.497954
chr8	98487337	98494295	L1PA16	L1PA16	1.00015
chr3	77805595	77811836	L1PA7	L1PA7	0.935027
chr2	34719176	34720569	LTR12C	LTR12C	0.627224
chr6	51739581	51745600	L1HS	L1HS	0.0185842
chr3	19391821	19397378	L1PA5	L1PA5	0.544988
chr12	2808663	2814808	L1PA4	L1PA4	0.29727
chr15	93310694	93312601	SVA_D	SVA_D	0.348091
chr1	159422743	159428766	L1PA3	L1PA3	0.214925
chr3	85202221	85208004	L1PA3	L1PA3	0.328524
chr8	9695879	9702303	L1PA7	L1PA7	0.956199
chr9	34761695	34767851	L1PA3	L1PA3	0.248184
chr6	51089148	51095290	L1PA3	L1PA3	0.363787
chr6	7925937	7932063	L1PA6	L1PA6	0.653004
chrX	123885343	123891492	L1PA3	L1PA3	0.231443
chr16	25567160	25573613	L1PA7	L1PA7	0.845113
chr3	115658716	115659382	LTR12_	LTR12_	0.943463
chr10	26044745	26045949	LTR12C	LTR12C	0.889493
chr6	126930154	126936691	L1PA7	L1PA7	0.860494
chr14	57457601	57458981	LTR12C	LTR12C	0.685937
chr5	120442691	120444226	LTR12C	LTR12C	0.759582
chr4	161402739	161404126	LTR12C	LTR12C	0.95338
chr2	177170651	177176760	L1PA6	L1PA6	0.730238
chr15	88900297	88906432	L1PA4	L1PA4	0.399006
chr6	7315271	7316554	LTR12C	LTR12C	0.962806
chr2	12021586	12027729	L1PA4	L1PA4	0.441503
chr7	136098928	136104958	L1PA2	L1PA2	0.0814503
chr7	30478858	30484890	L1HS	L1HS	0.00556305
chr21	25179151	25180631	LTR12C	LTR12C	0.8
chr13	49039691	49045702	L1HS	L1HS	0.00625952
chr20	42927589	42929018	LTR12C	LTR12C	0.748683
chr3	19743891	19745264	LTR12C	LTR12C	0.955224
chr1	52636672	52642813	L1PA3	L1PA3	0.244827
chr9	32957810	32963954	L1PA6	L1PA6	0.519689
chr3	175930337	175931766	LTR12C	LTR12C	0.725357
chr13	108603320	108603961	LTR12	LTR12	1.00185
chr17	54079762	54085977	L1PA3	L1PA3	0.319706
chr11	5981456	5982994	SVA_B	SVA_B	0.586926
chr5	12661846	12663171	LTR12C	LTR12C	0.89551
chr11	13550264	13556669	L1PA8	L1PA8	0.90341
chr15	46828438	46834580	L1PA4	L1PA4	0.393578
chr6	17744507	17746098	LTR12C	LTR12C	0.837022
chr5	96644466	96645148	LTR12_	LTR12_	0.924399
chr16	52367321	52373446	L1PA5	L1PA5	0.662905
chr13	98197347	98199001	LTR12C	LTR12C	0.892535
chrX	132178222	132179878	LTR12C	LTR12C	0.784704
chr4	54206156	54212274	L1PA6	L1PA6	0.693586
chr3	196700069	196701215	SVA_D	SVA_D	0.154876
chr3	138239621	138241142	SVA_B	SVA_B	0.663617
chrX	146735252	146741285	L1HS	L1HS	0.000337098
chrX	105712515	105718549	L1HS	L1HS	0.0273003
chr9	108539341	108545359	L1PA2	L1PA2	0.182325
chr12	40092936	40098887	L1PA3	L1PA3	0.430354
chr8	121656401	121662427	L1PA2	L1PA2	0.0916301
chrX	54598440	54599938	SVA_D	SVA_D	0.155222
chrY	17481051	17486443	L1PA6	L1PA6	0.991119
chr13	71863778	71864508	LTR12	LTR12	0.977778
chr11	98006588	98007087	LTR12F	LTR12F	1.00251
chr4	7216672	7217972	LTR12C	LTR12C	0.500833
chr22	43367119	43368518	SVA_B	SVA_B	0.793687
chr8	66528373	66529865	SVA_C	SVA_C	0.404454
chr4	89157177	89162187	L1MA2	L1MA2	1.0002
chr11	129043826	129049851	L1PA3	L1PA3	0.147511
chr8	31709127	31715149	L1PA3	L1PA3	0.215805
chrX	69034397	69041265	L1PA11	L1PA11	0.986111
chr2	235156149	235157423	LTR12C	LTR12C	0.98552
chr15	56853613	56859773	L1PA6	L1PA6	0.748185
chr5	162543862	162549984	L1PA5	L1PA5	0.553803
chr11	19602918	19609066	L1PA4	L1PA4	0.543155
chr5	105194584	105195930	SVA_C	SVA_C	0.732745
chr13	23701531	23703236	LTR12C	LTR12C	0.603115
chr3	162427325	162428863	LTR12C	LTR12C	0.880389
chr6	88032996	88038996	L1PA3	L1PA3	0.390847
chr10	77335337	77341344	L1P2	L1P2	0.871508
chrX	79845908	79847758	SVA_D	SVA_D	0.530857
chr11	26359725	26360505	LTR12	LTR12	0.961765
chr2	37950299	37956413	L1PA5	L1PA5	0.362654
chr11	74809068	74810547	LTR12C	LTR12C	0.698332
chr1	171281541	171282056	LTR12F	LTR12F	0.963855
chr3	186602163	186603392	SVA_D	SVA_D	0.5093
chr3	197328596	197330107	SVA_D	SVA_D	0.328845
chr11	88720163	88726195	L1PA4	L1PA4	0.182906
chr8	94976055	94982197	L1PA6	L1PA6	0.639358
chr6	3771689	3773210	LTR12C	LTR12C	0.88107
chr15	31696524	31697047	LTR12F	LTR12F	1.00236
chrX	145354895	145362493	L1PA14	L1PA14	1.00013
chr5	144104880	144112472	L1PB2	L1PB2	0.998665
chr15	21243914	21250060	L1PA4	L1PA4	0.144393
chr6	790741	791297	LTR12F	LTR12F	1.00219
chr2	211814831	211816323	SVA_C	SVA_C	0.438937
chr18	31911079	31917100	L1PA2	L1PA2	0.192873
chr3	64461469	64467635	L1PA4	L1PA4	0.416255
chr11	22046535	22052641	L1PA7	L1PA7	0.822844
chr15	56603341	56609375	L1PA2	L1PA2	0.15605
chr10	87034159	87040601	L1PA7	L1PA7	0.934406
chr6	77079149	77085308	L1PA4	L1PA4	0.578643
chr4	151874498	151875927	SVA_B	SVA_B	0.504138
chrX	46968754	46970972	LTR12C	LTR12C	0.477337
chr9	91299987	91301384	LTR12C	LTR12C	0.988435
chr15	24288341	24294495	L1PA4	L1PA4	0.55484
chr2	167710221	167716358	L1PA3	L1PA3	0.368229
chr4	64813792	64819356	L1PA4	L1PA4	0.344253
chr1	243012473	243018970	L1PB1	L1PB1	0.954979
chr5	12131916	12138444	L1PA15	L1PA15	1.00016
chrX	66406297	66412416	L1PA5	L1PA5	0.763084
chr8	57327780	57333811	L1PA3	L1PA3	0.230484
chr4	67426133	67427763	LTR12C	LTR12C	0.826797
chr12	22553035	22559111	L1PA5	L1PA5	0.656292
chr8	93412707	93413911	LTR12D	LTR12D	0.98913
chrX	20917886	20924489	L1PA15	L1PA15	1.00015
chr12	119095694	119101835	L1PA3	L1PA3	0.409369
chr14	102600761	102602412	LTR12C	LTR12C	0.631206
chr7	7123072	7129371	L1PA7	L1PA7	0.880303
chr8	11186832	11188441	SVA_C	SVA_C	0.540093
chr6	27620654	27622181	SVA_B	SVA_B	0.604064
chr11	15582286	15583680	LTR12C	LTR12C	1.00077
chr6_apd_hap1	2349089	2350543	SVA_C	SVA_C	0.0118168
chr5	179879995	179880592	LTR12F	LTR12F	1.00201
chrX	106008949	106015100	L1PA6	L1PA6	0.625351
chr11	24152978	24153707	LTR12	LTR12	1.00159
chr7	71202362	71203627	LTR12C	LTR12C	0.666094
chr14	52624491	52630583	L1PA6	L1PA6	0.674733
chr2	154107987	154113991	L1PA3	L1PA3	0.322154
chr13	42108887	42115004	L1PA4	L1PA4	0.27655
chr2	84732682	84738824	L1PA4	L1PA4	0.529295
chr1	105386455	105392486	L1HS	L1HS	0.023099
chr1	181841025	181847571	L1PB1	L1PB1	0.965715
chr13	50139127	50140405	SVA_C	SVA_C	0.193548
chr20	18313556	18319722	L1PA4	L1PA4	0.375206
chrX	73260445	73266814	L1PA7	L1PA7	0.950072
chr8	103144983	103151132	L1PA3	L1PA3	0.286494
chr9	27589148	27595333	L1PA16	L1PA16	1.00016
chr5	92777781	92783911	L1PA6	L1PA6	0.604146
chr12	127579150	127585176	L1PA2	L1PA2	0.11728
chr16	49243567	49245165	SVA_D	SVA_D	0.369159
chr8	117422583	117428698	L1PA6	L1PA6	0.665337
chr4	158965150	158966629	LTR12C	LTR12C	0.969543
chr2	174392017	174398045	L1PA3	L1PA3	0.151316
chr4	103404112	103405813	LTR12C	LTR12C	0.753279
chr3	166993055	166999054	L1PA3	L1PA3	0.220885
chr10	96561578	96562078	LTR12F	LTR12F	1.0025
chr9	92295819	92297412	LTR12C	LTR12C	0.964501
chr16	65390646	65396641	L1PA3	L1PA3	0.179644
chr6_dbb_hap3	3184626	3186517	SVA_D	SVA_D	0.00279174
chr4	83218688	83224839	L1PA5	L1PA5	0.439266
chr6	7943428	7949532	L1PA4	L1PA4	0.380247
chr2	230715252	230716658	LTR12C	LTR12C	0.79709
chr4	159802560	159804167	SVA_C	SVA_C	0.379562
chr2	23394422	23400568	L1PA5	L1PA5	0.601389
chr4	54164132	54170279	L1PA4	L1PA4	0.518439
chr11	31595740	31601491	L1PA5	L1PA5	0.6298
chr2	31719227	31725317	L1PA4	L1PA4	0.295993
chrX	70864220	70865715	SVA_B	SVA_B	0.568459
chr1	189379768	189385789	L1PA6	L1PA6	0.796825
chr8	139715905	139722035	L1PA5	L1PA5	0.55539
chr6	16592889	16593447	LTR12F	LTR12F	1.00218
chr3	32156126	32156946	LTR12	LTR12	0.944444
chr5	40634271	40640526	L1PA7	L1PA7	0.903818
chr6_dbb_hap3	2518220	2524001	L1PA6	L1PA6	0.013554
chr9	125473049	125474222	SVA_D	SVA_D	0.49767
chr7	72697294	72699357	SVA_F	SVA_F	0.272033
chr4	29230924	29237399	L1PA7	L1PA7	0.936157
chr4	173217519	173223665	L1PA4	L1PA4	0.53093
chr3	56725724	56727051	LTR12C	LTR12C	0.622657
chr5	113866360	113872492	L1PA5	L1PA5	0.70756
chrX	85006727	85012872	L1PA3	L1PA3	0.496112
chr13	53391595	53392987	SVA_B	SVA_B	0.458204
chrX	127803014	127809490	L1PA7	L1PA7	0.848338
chr20	52089183	52095192	L1PA2	L1PA2	0.119479
chr19	20248109	20249434	SVA_D	SVA_D	0.343673
chrX	73907172	73913326	L1PA4	L1PA4	0.433598
chr8	120246186	120252156	L1PA3	L1PA3	0.299148
chr2	91639329	91645453	L1PA4	L1PA4	0.164011
chrX	77186509	77188447	SVA_D	SVA_D	0.367247
chr4	63432157	63438088	L1PA7	L1PA7	0.889213
chr13	88943891	88945338	LTR12C	LTR12C	0.85078
chr19	18115825	18117465	SVA_D	SVA_D	0.42013
chr7	51873349	51874567	LTR12C	LTR12C	0.955277
chr8	76365440	76365956	LTR12F	LTR12F	0.956731
chr9	11486167	11486317	L1PA7	L1PA7	1.02
chr3	53474785	53480929	L1PA5	L1PA5	0.61317
chr2	235470777	235472251	SVA_E	SVA_E	0.352256
chr2	120754376	120755784	LTR12C	LTR12C	0.886086
chr8	47651511	47657651	L1PA4	L1PA4	0.72351
chr2	102940831	102946961	L1PA4	L1PA4	0.459204
chrX	26222737	26224182	LTR12C	LTR12C	0.712268
chr3	140736150	140736904	LTR12	LTR12	0.915902
chrY	23982987	23983630	LTR12_	LTR12_	0.990792
chrX	54792138	54796837	L1PA2	L1PA2	0.0808871
chr20	9365446	9366935	SVA_A	SVA_A	0.849532
chr1	179387124	179388800	SVA_D	SVA_D	0.31599
chr10	58201840	58207997	L1PA3	L1PA3	0.491002
chr8	104963546	104969997	L1PA7	L1PA7	0.885845
chr6	131556046	131562207	L1PA4	L1PA4	0.337568
chr13	20070926	20076953	L1PA2	L1PA2	0.176818
chr10	86731713	86737865	L1PA5	L1PA5	0.581791
chr5	95186686	95188353	LTR12C	LTR12C	0.737715
chr5	75191890	75198059	L1PA3	L1PA3	0.347009
chr11	86236924	86243027	L1PA4	L1PA4	0.430451
chr10	23955345	23961491	L1PA4	L1PA4	0.534734
chr6	19221059	19227211	L1PA4	L1PA4	0.494217
chr5	150768973	150775117	L1PA5	L1PA5	0.519358
chr3	13221072	13222474	LTR12C	LTR12C	0.725806
chr2	63437611	63443856	L1PA5	L1PA5	0.68869
chr1	192880759	192881507	LTR12_	LTR12_	0.924383
chr2	43887610	43893639	L1PA2	L1PA2	0.00354191
chr7	152922394	152923072	LTR12_	LTR12_	1.00173
chrX	88036410	88042563	L1PA3	L1PA3	0.259376
chr9	87686580	87692593	L1PA3	L1PA3	0.159479
chrX	116010897	116017637	L1M1	L1M1	1.00015
chr8	56528304	56534168	L1PA4	L1PA4	0.72762
chr7	31176649	31177191	LTR12_	LTR12_	1.00226
chr12	106939695	106945827	L1PA6	L1PA6	0.639257
chr7	70502400	70503948	LTR12C	LTR12C	0.507597
chr7	158071292	158072581	LTR12D	LTR12D	0.990749
chrX	76525505	76531048	L1PA4	L1PA4	0.620797
chr5	152704886	152710890	L1PA2	L1PA2	0.382961
chr8	96409176	96409956	LTR12	LTR12	1.00147
chr5	118334154	118335407	SVA_B	SVA_B	0.509107
chrX	108309877	108315967	L1PA4	L1PA4	0.450417
chr11	35821572	35822180	LTR12	LTR12	0.954724
chr5	152450542	152456568	L1HS	L1HS	0.0860614
chr4	70690280	70691117	LTR12_	LTR12_	1.00136
chr3	188735018	188743326	L1PA3	L1PA3	0.380604
chr6	8770704	8776745	L1PA2	L1PA2	0.0666554
chr10	114010657	114016819	L1PA4	L1PA4	0.303035
chr2	190517645	190519221	SVA_B	SVA_B	0.741192
chr1	118768174	118768706	LTR12F	LTR12F	1.00231
chr14	88835890	88842383	L1PA7	L1PA7	0.882371
chr4	100921681	100927710	L1PA2	L1PA2	0.0413223
chr19	39558672	39559321	LTR12	LTR12	0.903461
chr2	171770952	171772415	LTR12C	LTR12C	1.00073
chr18	31399174	31400752	LTR12D	LTR12D	0.777402
chr7	49719864	49725896	L1HS	L1HS	0.00876601
chr2	69849032	69850460	LTR12C	LTR12C	0.716867
chr10	68659151	68665277	L1PA6	L1PA6	0.781115
chrX	105203682	105209729	L1PA4	L1PA4	0.493526
chr2	137654766	137655726	LTR12	LTR12	0.940698
chr11	130206425	130207820	LTR12C	LTR12C	0.872587
chr2	35331926	35338075	L1PA3	L1PA3	0.3551
chrX	105040899	105046916	L1PA3	L1PA3	0.202467
chr2	144383944	144384414	LTR12F	LTR12F	0.937838
chr5	45580638	45586774	L1PA4	L1PA4	0.528827
chr6	22384255	22390625	L1PA8A	L1PA8A	0.929665
chr5	156851369	156857474	L1PA6	L1PA6	0.697252
chr13	44575540	44576194	LTR12	LTR12	0.904332
chr8	102438008	102444107	L1PA4	L1PA4	0.400233
chr2	150961485	150962279	LTR12	LTR12	1.00144
chr14	39931552	39939125	L1MA3	L1MA3	0.999732
chr12	79946650	79948342	LTR12C	LTR12C	0.888191
chr6	24811906	24817934	L1HS	L1HS	0.0212551
chr6	133935447	133941881	L1PA7	L1PA7	0.883486
chr11	129363379	129369492	L1PA6	L1PA6	0.792949
chr13	61913116	61914396	LTR12E	LTR12E	0.947458
chr6	94575470	94581501	L1HS	L1HS	0.0365874
chr3	20468634	20475062	L1PA7	L1PA7	0.870733
chr17	17294870	17295759	LTR12_	LTR12_	1.00127
chr15	24322736	24324134	LTR12C	LTR12C	0.968413
chr6	98530911	98537081	L1PA3	L1PA3	0.438715
chr7	78859110	78865127	L1PA2	L1PA2	0.0872064
chr2	195503853	195509635	L1PA6	L1PA6	0.716473
chr18	57845108	57845890	LTR12	LTR12	0.989736
chr11	87299620	87305989	L1PA8A	L1PA8A	0.93763
chr10	86516634	86522638	L1PA2	L1PA2	0.129573
chr5	57989766	57995926	L1PA6	L1PA6	0.760561
chr6	85805623	85806067	LTR12F	LTR12F	1.00291
chr8	42544454	42545871	LTR12C	LTR12C	0.94609
chrY	19820235	19826384	L1PA3	L1PA3	0.0330633
chr4	145403622	145409725	L1PA6	L1PA6	0.783941
chr11	57715023	57721462	L1PA7	L1PA7	0.861492
chr5	86068140	86074417	L1PA7	L1PA7	0.92634
chr6	129150607	129156791	L1PA5	L1PA5	0.524984
chr5	146659430	146665986	L1PB1	L1PB1	0.944857
chr1	50020318	50021160	LTR12D	LTR12D	0.799191
chr4	150009746	150015886	L1PA4	L1PA4	0.550331
chr9	79137834	79139169	LTR12C	LTR12C	0.88583
chr6_qbl_hap6	2067413	2068701	LTR12C	LTR12C	0.0159933
chr9	98813556	98814051	LTR12F	LTR12F	1.00253
chr4	74191571	74192195	LTR12_	LTR12_	0.950382
chr3	144475553	144477081	LTR12C	LTR12C	0.977591
chr2	158560688	158567129	L1PA7	L1PA7	0.781896
chr10	15576784	15578189	LTR12C	LTR12C	0.914943
chr10	99911664	99913385	SVA_C	SVA_C	0.592227
chr12	14506970	14508474	SVA_C	SVA_C	0.372507
chr5	128620939	128627050	L1PA4	L1PA4	0.553818
chr7	146602876	146608909	L1PA2	L1PA2	0.132816
chr6	112250237	112256625	L1PA7	L1PA7	0.846056
chrX	130379518	130385548	L1PA2	L1PA2	0.141315
chr1	144016769	144018639	LTR12C	LTR12C	0.475141
chr1	150872300	150872989	LTR12_	LTR12_	0.979626
chr6	13853993	13855510	LTR12C	LTR12C	0.930134
chr14	41793577	41799700	L1PA6	L1PA6	0.877304
chr2	161304789	161306349	SVA_B	SVA_B	0.534932
chr15	78537613	78539044	LTR12C	LTR12C	0.659654
chr5	68477454	68478192	LTR12	LTR12	0.976489
chr4	95240918	95247072	L1PA5	L1PA5	0.682854
chr4	128571375	128577400	L1PA2	L1PA2	0.194768
chr8	133264403	133265108	LTR12_	LTR12_	0.942149
chrX	49784085	49790114	L1HS	L1HS	0.02901
chr2	108008561	108009937	LTR12C	LTR12C	0.909875
chr6_qbl_hap6	3113306	3114534	LTR12C	LTR12C	0.0957447
chr4	169955884	169957551	LTR12C	LTR12C	0.616465
chr18	75127932	75133958	L1PA3	L1PA3	0.229497
chr3	110350835	110356898	L1PA3	L1PA3	0.185477
chr9	5292781	5299173	L1PA7	L1PA7	0.897489
chr16	83670857	83676901	L1HS	L1HS	0.0200202
chrX	22246857	22253417	L1PA7	L1PA7	0.913467
chr8	47708948	47715090	L1PA3	L1PA3	0.447865
chr5	104264510	104265943	LTR12C	LTR12C	0.883721
chr1	27129382	27131339	SVA_D	SVA_D	0.389876
chr6	139405568	139411699	L1PA6	L1PA6	0.587796
chr6_ssto_hap7	1085235	1091271	L1PA6	L1PA6	0.0139825
chr18	20109599	20115627	L1PA2	L1PA2	0.0948043
chr3	51883818	51884635	LTR12	LTR12	1.00139
chr10	32837573	32843653	L1PB1	L1PB1	0.919064
chr2	204209355	204210191	LTR12	LTR12	1.00136
chr6	2286478	2292929	L1PA7	L1PA7	0.86569
chr11	3609772	3611170	LTR12C	LTR12C	0.59168
chr12	46903935	46911144	L1PA14	L1PA14	0.996202
chr4	75835411	75841855	L1PA7	L1PA7	0.919609
chr1	231589279	231590759	SVA_B	SVA_B	0.485507
chr1	29456756	29458154	LTR12C	LTR12C	0.746533
chr13	59583293	59583784	LTR12_	LTR12_	1.00256
chr13	70783110	70789024	L1PA4	L1PA4	0.429653
chr4	61877379	61883506	L1PA4	L1PA4	0.553177
chr2	14239258	14245416	L1PA4	L1PA4	0.394355
chr6	18228620	18234510	L1PA5	L1PA5	0.594991
chr12	16027380	16028725	LTR12C	LTR12C	0.727711
chr4	83105272	83111434	L1PA7	L1PA7	0.825635
chr12	38286206	38292344	L1PA4	L1PA4	0.823451
chrX	74466972	74473036	L1PA4	L1PA4	0.614017
chr8	92383517	92390208	L1PA17	L1PA17	1
chr19	20673131	20679413	L1PA4	L1PA4	0.544969
chr13	20185686	20192030	L1PA5	L1PA5	0.388533
chr6	24083074	24089229	L1PA3	L1PA3	0.224773
chr11	96947416	96948983	LTR12C	LTR12C	0.408316
chr2	50310564	50311899	LTR12C	LTR12C	0.992713
chr3	86088231	86094370	L1PA4	L1PA4	0.570624
chr5	92548851	92554882	L1PA2	L1PA2	0.136739
chr6	51760454	51766481	L1PA3	L1PA3	0.271132
chr9	1749540	1755665	L1PA3	L1PA3	0.472531
chr9	120404176	120405569	LTR12C	LTR12C	0.87935
chr15	55218234	55224297	L1HS	L1HS	0.00117391
chrY	17104054	17104462	LTR12F	LTR12F	1.00325
chr16	28708506	28710833	SVA_F	SVA_F	0.0664571
chrX	58536795	58543220	L1PA3	L1PA3	0.618814
chr9	33085447	33091565	L1PA5	L1PA5	0.560651
chr4	109904693	109906072	LTR12C	LTR12C	0.805317
chrX	109849056	109855096	L1PA3	L1PA3	0.212626
chr3	121944942	121946587	LTR12C	LTR12C	0.815534
chr16	48984995	48986665	SVA_F	SVA_F	0.222293
chr12	117098347	117099725	LTR12C	LTR12C	0.884194
chr6	2418008	2424037	L1HS	L1HS	0.0163603
chr8	39290496	39296686	L1PA10	L1PA10	0.960263
chr7	122719397	122725490	L1PA5	L1PA5	0.604539
chrX	82057809	82063948	L1PA3	L1PA3	0.468124
chr12	60144893	60151047	L1PA3	L1PA3	0.371655
chr6	71634878	71641048	L1PA5	L1PA5	0.723558
chr2	38231838	38238001	L1PA4	L1PA4	0.464127
chr5	43791740	43797880	L1PA4	L1PA4	0.673179
chrY	6720474	6726489	L1PA3	L1PA3	0.365173
chr8	101414048	101420173	L1PA5	L1PA5	0.459917
chr11	72620084	72621885	SVA_A	SVA_A	0.766608
chr10	56054896	56055487	LTR12_	LTR12_	0.997963
chr1	97823393	97829515	L1PA6	L1PA6	0.746596
chrX	37565890	37567494	SVA_D	SVA_D	0.545878
chr15	47457729	47463757	L1PA2	L1PA2	0.145412
chr13	48286273	48292443	L1PA3	L1PA3	0.278254
chr8	26253128	26259095	L1PA2	L1PA2	0.060167
chrX	97354895	97362263	L1MA2	L1MA2	0.99945
chr4	62805645	62811680	L1HS	L1HS	0.00673968
chr1	91832194	91838304	L1PA4	L1PA4	0.427454
chr11	33698400	33704903	L1PB1	L1PB1	0.960175
chrX	57889627	57895739	L1PA5	L1PA5	0.74501
chr4	18419093	18420526	LTR12C	LTR12C	0.813953
chr12	68293988	68300004	L1PA2	L1PA2	0.199797
chr2	55689297	55695446	L1PA6	L1PA6	0.593982
chrUn_gl000222	164610	166011	LTR12C	LTR12C	0.00461184
chr3	93762524	93764304	SVA_A	SVA_A	0.767262
chr2	161632831	161639086	L1PA15	L1PA15	1.00016
chr8	125141189	125147712	L1PA15	L1PA15	1.00016
chrX	80398877	80405128	L1PA7	L1PA7	0.890424
chr17	75771717	75773742	SVA_E	SVA_E	0.0955844
chr7	147560025	147566201	L1PA6	L1PA6	0.738479
chr12	10027905	10029204	LTR12C	LTR12C	0.817348
chr12	60628155	60634544	L1PA7	L1PA7	0.964382
chrX	56198547	56204642	L1PA4	L1PA4	0.794495
chr22	29165057	29165764	LTR12_	LTR12_	1.00165
chr20	54624623	54631082	L1PA7	L1PA7	0.85894
chr13	90535199	90536642	LTR12C	LTR12C	0.930752
chr2	52233754	52235152	LTR12C	LTR12C	0.694145
chr16	19402180	19403108	LTR12	LTR12	0.888889
chr3	154466971	154474579	L1MA3	L1MA3	1.00013
chr6	74545108	74551122	L1PA2	L1PA2	0.215252
chr7	111603248	111609278	L1HS	L1HS	0.0244519
chr15	88006969	88012980	L1PA3	L1PA3	0.177973
chr4	171237561	171243683	L1PA6	L1PA6	0.725008
chr10	65704398	65710532	L1PA4	L1PA4	0.446801
chr14	25195453	25201844	L1PA8A	L1PA8A	0.981084
chr5	109636333	109644019	L1MA1	L1MA1	0.998682
chr14	86571803	86577838	L1PA2	L1PA2	0.243471
chr4	18247655	18248072	LTR12F	LTR12F	1.00315
chr1	116594534	116600673	L1PA3	L1PA3	0.251532
chr8	52289888	52291536	LTR12C	LTR12C	0.827519
chrX	69583095	69589247	L1PA4	L1PA4	0.486616
chrX	128987615	128993336	L1PA5	L1PA5	0.434442
chr6	108175922	108181952	L1PA3	L1PA3	0.113659
chr5	16985027	16985782	LTR12	LTR12	0.978626
chr4	132273548	132279564	L1PA3	L1PA3	0.35835
chr12	42437275	42443438	L1PA3	L1PA3	0.398318
chr1	47631596	47637733	L1PA4	L1PA4	0.426868
chr1	226157286	226158918	LTR12C	LTR12C	0.784595
chr7	86887189	86893296	L1PA6	L1PA6	0.840353
chr9	88332594	88338733	L1PA6	L1PA6	0.762212
chr13	32181867	32183528	LTR12C	LTR12C	0.700192
chr15	97975923	97982079	L1PA3	L1PA3	0.421235
chr16	8164385	8165934	SVA_D	SVA_D	0.728778
chr13	29779548	29786113	L1PB1	L1PB1	0.953596
chr11	110253534	110259636	L1PA5	L1PA5	0.487171
chr15	29499459	29499948	LTR12F	LTR12F	1.00257
chrX	71397823	71399841	SVA_E	SVA_E	0.061001
chr8	34397943	34403905	L1PA5	L1PA5	0.593825
chr3	6382506	6388622	L1PA3	L1PA3	0.335938
chr3	170687577	170693525	L1PA7	L1PA7	0.841313
chr12	129540426	129546596	L1PA4	L1PA4	0.392257
chr4	165162765	165168772	L1PA2	L1PA2	0.223125
chr16	29759505	29760641	LTR12C	LTR12C	0.950772
chr4	165851077	165851740	LTR12_	LTR12_	0.927176
chr1	58632831	58633668	LTR12	LTR12	0.777476
chr10	59095999	59097022	LTR12D	LTR12D	1.00108
chr11	93965690	93971694	L1PA2	L1PA2	0.182927
chrX	103605320	103611468	L1PA5	L1PA5	0.464451
chr3	75337883	75339607	SVA_D	SVA_D	0.304803
chr6	39422333	39428310	L1PA2	L1PA2	0.0803131
chr14	26321140	26327206	L1PA4	L1PA4	0.43815
chr5	14454863	14456531	LTR12C	LTR12C	0.885204
chr20	37006831	37008588	SVA_D	SVA_D	0.378998
chr1	61105684	61111709	L1PA2	L1PA2	0.187679
chr13	51326578	51328003	LTR12C	LTR12C	0.783396
chr3	97623581	97629617	L1PA3	L1PA3	0.206368
chr4	53017370	53023777	L1PA7	L1PA7	0.878231
chr14	32180749	32181895	LTR12D	LTR12D	0.976099
chr14	43922963	43929098	L1PA10	L1PA10	1.00017
chr1	75389234	75395787	L1PA11	L1PA11	0.99969
chr4	121171890	121177933	L1PA2	L1PA2	0.207134
chr8	41483238	41484830	SVA_D	SVA_D	0.101877
chr4	23643367	23649395	L1PA3	L1PA3	0.255061
chr2	99594298	99600476	L1PA4	L1PA4	0.346167
chr21	10172554	10178706	L1PA2	L1PA2	0.0275942
chr2	157111030	157117044	L1PA2	L1PA2	0.162496
chr2	57835982	57841983	L1PA3	L1PA3	0.233859
chrY	4339105	4346482	L1MA2	L1MA2	0.385736
chr4	156360894	156361609	LTR12	LTR12	1.00163
chr18	22846416	22852886	L1PA7	L1PA7	0.873783
chr3	176920633	176922250	LTR12C	LTR12C	0.941332
chr9	83269031	83275050	L1PA2	L1PA2	0.357324
chrY	7257370	7258192	LTR12	LTR12	0.980609
chr10	85097125	85103251	L1PA5	L1PA5	0.585131
chr2	139553224	139559656	L1PA7	L1PA7	0.899874
chr11	94117521	94123498	L1PA5	L1PA5	0.506891
chr14	60848347	60854522	L1PA6	L1PA6	0.773333
chr10	71751829	71753613	SVA_E	SVA_E	0.120546
chr3	181868202	181874958	L1PA7	L1PA7	0.894381
chr8	64396864	64402894	L1PA2	L1PA2	0.137268
chr3	186152652	186154023	SVA_B	SVA_B	0.698662
chr4	171964133	171965586	LTR12C	LTR12C	0.939394
chr3	15228172	15234206	L1PA3	L1PA3	0.0866195
chr4	69980015	69981525	LTR12C	LTR12C	0.82695
chr1	89738135	89739573	LTR12C	LTR12C	0.973842
chr7	109670186	109676346	L1PA4	L1PA4	0.519802
chr3	95306374	95307934	LTR12C	LTR12C	0.962329
chrX	72251521	72257675	L1PA3	L1PA3	0.411629
chrX	145309443	145315613	L1PA6	L1PA6	0.695717
chr7	78517061	78523205	L1PA4	L1PA4	0.48908
chr21	30049239	30055384	L1PA4	L1PA4	0.357155
chr11	10967903	10974269	L1PA7	L1PA7	0.816949
chr18	46628788	46634920	L1PA4	L1PA4	0.387268
chr7	13141599	13143290	SVA_D	SVA_D	0.340038
chr2	75951685	75952931	SVA_D	SVA_D	0.564572
chr5	100035609	100041502	L1PA6	L1PA6	0.761609
chr8	71812897	71818518	L1PA5	L1PA5	0.805289
chr13	61401335	61407480	L1PA4	L1PA4	0.457403
chr7	108328504	108335670	L1MA1	L1MA1	0.998443
chr5	73170235	73176394	L1PA3	L1PA3	0.194091
chr1	79976959	79982965	L1PA3	L1PA3	0.222147
chr4	150389174	150395288	L1PA5	L1PA5	0.613901
chr18	62239800	62245911	L1PA4	L1PA4	0.44352
chrX	72891607	72897722	L1PA4	L1PA4	0.525187
chr20	18841860	18847993	L1PA5	L1PA5	0.586441
chr17	20460236	20461343	SVA_B	SVA_B	0.61569
chr7	32003580	32009764	L1PA4	L1PA4	0.487673
chr2	71769504	71770985	SVA_C	SVA_C	0.543085
chr8	53866200	53867682	LTR12C	LTR12C	0.849493
chr4	53634340	53640458	L1PA5	L1PA5	0.578099
chr7	127069034	127070572	LTR12C	LTR12C	0.855355
chr11	55227392	55233413	L1PA2	L1PA2	0.440128
chr4_gl000194_random	168440	174573	L1PA4	L1PA4	0.0976297
chr6	11171125	11172491	LTR12C	LTR12C	0.939179
chrX	5398497	5404507	L1PA2	L1PA2	0.139086
chr13	52556763	52563203	L1PA7	L1PA7	0.753628
chr9	23860608	23867053	L1PA7	L1PA7	0.908274
chr4	127983715	127989758	L1PA3	L1PA3	0.170453
chr6	86761533	86767677	L1PA3	L1PA3	0.447882
chr17	38354148	38355008	LTR12	LTR12	1
chr1	214895036	214901448	L1PA7	L1PA7	0.820342
chr4	45568899	45570338	LTR12C	LTR12C	0.880508
chrX	72696027	72702473	L1PA7	L1PA7	0.967854
chr21	19142070	19148521	L1PA7	L1PA7	0.749803
chr19	23601419	23603055	SVA_C	SVA_C	0.657552
chr12	73788589	73794610	L1PA2	L1PA2	0.161628
chr12	61060617	61067338	L1PA11	L1PA11	0.995318
chr8	76533559	76539590	L1HS	L1HS	0.0583375
chr3	135833236	135839141	L1PA8	L1PA8	0.781568
chrX	30000000	30006002	L1PA3	L1PA3	0.226025
chr1	108702086	108703621	SVA_D	SVA_D	0.159582
chr6	58583367	58584872	SVA_C	SVA_C	0.47331
chr1	225355890	225361977	L1PA4	L1PA4	0.563554
chr7	33200737	33206624	L1PA6	L1PA6	0.705547
chr6	16288313	16289549	LTR12C	LTR12C	0.989437
chr9	98459867	98465900	L1HS	L1HS	0.0340469
chr11	129180603	129181425	LTR12	LTR12	0.927978
chr11	26509946	26510639	LTR12_	LTR12_	1
chr9	39041528	39042917	LTR12C	LTR12C	0.17533
chr13	108830408	108831088	LTR12_	LTR12_	0.984483
chr13	23155050	23160875	L1PA8	L1PA8	0.943057
chr17	65290693	65292254	LTR12C	LTR12C	0.775496
chr6	5886392	5892159	L1PA2	L1PA2	0.154756
chr5	20612908	20613539	LTR12	LTR12	1.00188
chr8	56568709	56574862	L1PA6	L1PA6	0.773501
chr6	152930133	152936264	L1PA6	L1PA6	0.751451
chr19	39311976	39313945	LTR12C	LTR12C	0.843767
chr11	48431615	48437779	L1PA4	L1PA4	0.756266
chr2	84354904	84355615	LTR12	LTR12	0.944354
chr4	77205997	77212212	L1PA8	L1PA8	0.892396
chr1	166212290	166218321	L1HS	L1HS	0.0632271
chr5	40468844	40474991	L1PA3	L1PA3	0.75492
chr13	46736399	46737787	SVA_C	SVA_C	0.680124
chr6	169748006	169754413	L1PA7	L1PA7	0.863326
chr3	136916703	136918178	SVA_D	SVA_D	0.256727
chr9	85664454	85670486	L1HS	L1HS	0.0699595
chr8	25626208	25632319	L1PB1	L1PB1	0.959907
chr8	62027934	62033953	L1PA3	L1PA3	0.200203
chr6_cox_hap2	725665	731226	L1PA7	L1PA7	0.062809
chr12	89102634	89108662	L1PA2	L1PA2	0.190283
chr4	142886862	142893000	L1PA6	L1PA6	0.911229
chr10	60435602	60441396	L1PA7	L1PA7	0.936776
chrX	109869236	109875695	L1PA7	L1PA7	0.911621
chr2	106936712	106937319	LTR12F	LTR12F	0.998028
chr3	41600367	41605927	L1PA4	L1PA4	0.704945
chrX	51255167	51261196	L1PA3	L1PA3	0.454208
chr10	36147596	36153623	L1PA3	L1PA3	0.134132
chr5	38861219	38863315	SVA_D	SVA_D	0.549599
chr8	32028876	32035001	L1PA4	L1PA4	0.501411
chrX	79555721	79562741	L1MA1	L1MA1	1.00014
chr4	20740248	20746401	L1PA5	L1PA5	0.680324
chr19	40543822	40549961	L1PA4	L1PA4	0.273886
chr5	121159163	121165552	L1PB1	L1PB1	0.994594
chr17	66095240	66096756	LTR12C	LTR12C	0.830508
chr7	100735043	100736635	SVA_C	SVA_C	0.529491
chr19	23132318	23138474	L1PA6	L1PA6	0.818197
chr3	155758926	155760339	LTR12C	LTR12C	0.89642
chr4	89233183	89234862	LTR12C	LTR12C	0.788474
chr13	95024453	95030445	L1PA3	L1PA3	0.128819
chr9	104697696	104703837	L1PA4	L1PA4	0.502069
chr1	69283218	69284650	LTR12C	LTR12C	0.886637
chr8	64091778	64093543	SVA_D	SVA_D	0.292492
chr5	57583888	57590011	L1PA3	L1PA3	0.311141
chr7	105050468	105052241	SVA_D	SVA_D	0.27376
chrX	90091229	90097366	L1PA4	L1PA4	0.223124
chr4	27071855	27077886	L1PA2	L1PA2	0.0871691
chr5	95890944	95897072	L1PA4	L1PA4	0.446251
chr15	65592548	65593976	LTR12C	LTR12C	0.887048
chr17	30058615	30059539	LTR12	LTR12	0.959951
chr5	120870230	120876381	L1PA15	L1PA15	1.00017
chr4	56163328	56169455	L1PA6	L1PA6	0.757093
chr2	167362090	167368516	L1PA8	L1PA8	0.960322
chr5	158545999	158547425	LTR12C	LTR12C	0.802413
chr3	26824587	26830621	L1PA3	L1PA3	0.255982
chr14	59153136	59154536	LTR12C	LTR12C	0.761538
chr6_ssto_hap7	2498002	2499546	LTR12C	LTR12C	0.0103878
chr11	73607342	73609277	SVA_D	SVA_D	0.490463
chr3	23071908	23078021	L1PA6	L1PA6	0.766506
chr3	29823187	29829336	L1PB1	L1PB1	0.998843
chr1	171274021	171274557	LTR12F	LTR12F	1.00229
chrX	125238107	125244120	L1PA3	L1PA3	0.154913
chr7	55469238	55471173	SVA_D	SVA_D	0.223978
chr2	189726718	189733128	L1PA8A	L1PA8A	0.973376
chr5	41073379	41079530	L1PA4	L1PA4	0.47331
chr4	148771080	148771896	LTR12	LTR12	0.893855
chr11	93981248	93987357	L1PA5	L1PA5	0.65352
chr3	59017621	59024017	L1PA7	L1PA7	0.885959
chr3	17654383	17660531	L1PA6	L1PA6	0.814649
chr4	160299076	160300594	LTR12C	LTR12C	0.950635
chr1	99973119	99975021	SVA_B	SVA_B	0.838513
chr12	77484199	77490373	L1PA6	L1PA6	0.77165
chrX	151712997	151719022	L1PA2	L1PA2	0.170295
chr11	516847	518179	SVA_A	SVA_A	0.792208
chr15	85595060	85600718	L1PA5	L1PA5	0.47733
chr2	111557212	111557848	LTR12F	LTR12F	0.934701
chr6	70205254	70211277	L1PA2	L1PA2	0.252744
chr14	92044122	92045736	LTR12C	LTR12C	0.891678
chr7	84879170	84885195	L1PA2	L1PA2	0.226498
chr2	76929218	76935241	L1PA3	L1PA3	0.294952
chr3	158228897	158234912	L1PA3	L1PA3	0.241082
chr16	58782579	58783947	LTR12C	LTR12C	0.993691
chrX	102709472	102715599	L1PA4	L1PA4	0.359051
chr3	78993676	78999822	L1PA4	L1PA4	0.468243
chr17	41869882	41875976	L1PA5	L1PA5	0.450617
chr6	86404517	86410601	L1PA5	L1PA5	0.596257
chr11	102309352	102315432	L1PA6	L1PA6	0.664047
chr16	61815982	61822005	L1PA2	L1PA2	0.085092
chr11	81454776	81456124	LTR12C	LTR12C	0.994391
chr2	53485894	53487191	LTR12D	LTR12D	0.989975
chrX	76488617	76494585	L1PA5	L1PA5	0.734833
chr12	112956864	112958259	LTR12C	LTR12C	0.840927
chr11	81696540	81698270	LTR12C	LTR12C	0.953374
chr8	31100876	31102177	LTR12C	LTR12C	0.832639
chr3	41465068	41471407	L1PA10	L1PA10	0.984453
chr8	11879987	11881369	LTR12C	LTR12C	0.923557
chrY	23099686	23105818	L1PA4	L1PA4	0.831731
chr15	58485567	58491749	L1PA5	L1PA5	0.650444
chr8	53873781	53875118	LTR12C	LTR12C	0.966047
chr2	228895610	228901759	L1PA4	L1PA4	0.450984
chr7	93416959	93422991	L1HS	L1HS	0.0362441
chr5	29270156	29276538	L1PA7	L1PA7	0.951449
chr9	31932201	31938373	L1PA3	L1PA3	0.39361
chr4	128417960	128418685	LTR12	LTR12	0.9632
chr18	70683715	70689333	L1PA5	L1PA5	0.689018
chr5	61968626	61974777	L1PA4	L1PA4	0.423401
chr6	129543494	129549597	L1PA5	L1PA5	0.569882
chr8	67861338	67867354	L1PA2	L1PA2	0.105308
chr9	23451851	23453232	LTR12C	LTR12C	0.943013
chr1	146532859	146534323	SVA_B	SVA_B	0.664956
chrX	27020158	27020974	LTR12	LTR12	0.743017
chr20	62431731	62433177	LTR12C	LTR12C	0.825409
chr2	124441165	124443947	LTR12C	LTR12C	0.417226
chr8	107108333	107114554	L1MA3	L1MA3	0.996569
chr11	24349497	24355547	L1HS	L1HS	0.0117647
chr6	71492594	71498172	L1PA4	L1PA4	0.270354
chr6	76392121	76398245	L1PA6	L1PA6	0.61421
chr2	141976355	141982556	L1PA10	L1PA10	0.989674
chr4	171048016	171049308	LTR12D	LTR12D	0.994966
chrX	154167310	154173456	L1PA3	L1PA3	0.344856
chr13	83363084	83363774	LTR12D	LTR12D	0.889831
chr15	25500760	25506894	L1PA5	L1PA5	0.493205
chr6	53227263	53228805	LTR12C	LTR12C	0.931345
chr5	74425784	74427159	LTR12D	LTR12D	0.944314
chr6	57423090	57429120	L1PA3	L1PA3	0.296796
chr3	89918194	89924219	L1PA2	L1PA2	0.100084
chr6_dbb_hap3	1048357	1054393	L1PA6	L1PA6	0.00404313
chr18	28927931	28933959	L1PA2	L1PA2	0.0689946
chrX	127916632	127922648	L1PA3	L1PA3	0.230392
chr15	31067380	31073593	L1PA4	L1PA4	0.502208
chr6	139027074	139033187	L1PA6	L1PA6	0.650757
chr12	8453664	8459778	L1PA4	L1PA4	0.511307
chr13	68254379	68260420	L1PA2	L1PA2	0.161252
chr5	57395946	57401521	L1PA7	L1PA7	0.846758
chr13	96567832	96573615	L1PA11	L1PA11	0.991906
chr8	64417326	64423450	L1PA6	L1PA6	0.834827
chr9	77817544	77823571	L1PA3	L1PA3	0.260672
chr3	162054244	162054973	LTR12	LTR12	0.969793
chr16	89501428	89502099	LTR12	LTR12	0.968476
chr1	55895929	55902497	L1PA7	L1PA7	0.838435
chr11	87213254	87219426	L1PA6	L1PA6	0.789361
chr15	71163291	71164789	SVA_B	SVA_B	0.507868
chr3	87389676	87395654	L1PA3	L1PA3	0.377509
chr10	109873701	109879764	L1PA2	L1PA2	0.0741238
chr21	27150496	27151850	LTR12C	LTR12C	0.948166
chr4	5172035	5178162	L1PA4	L1PA4	0.484984
chr12	40119968	40125586	L1PA7	L1PA7	0.828199
chrY	26565314	26566461	LTR12D	LTR12D	0.0095511
chrX	36483248	36489300	L1PA2	L1PA2	0.0793011
chr20	39538106	39539675	LTR12C	LTR12C	0.591559
chr5	101826213	101827614	LTR12C	LTR12C	0.944658
chr3	105937257	105942840	L1PA7	L1PA7	0.871056
chr11	49796675	49802703	L1PA2	L1PA2	0.139676
chr22	35184700	35190829	L1PA5	L1PA5	0.473545
chrX	39134688	39136093	LTR12C	LTR12C	0.772414
chrX	124288447	124289873	LTR12C	LTR12C	0.791855
chr4_gl000194_random	189940	191469	SVA_D	SVA_D	0.548635
chrX	55469670	55475848	L1PA6	L1PA6	0.761106
chr6	103251295	103257459	L1PA6	L1PA6	0.771768
chr6	62290124	62290826	LTR12_	LTR12_	1.00166
chr14	40685492	40686557	LTR12D	LTR12D	0.990674
chr2	170982119	170988584	L1PA7	L1PA7	0.761822
chr5	37414883	37416667	SVA_D	SVA_D	0.373515
chr6	112848862	112850423	SVA_D	SVA_D	0.409993
chr3	34565362	34566093	LTR12	LTR12	0.833597
chr14	52851212	52857024	L1PA4	L1PA4	0.409139
chr7	137109144	137115310	L1PA3	L1PA3	0.307946
chr12	88830453	88836909	L1PA7	L1PA7	0.888767
chr17	8620363	8621950	LTR12C	LTR12C	0.911903
chrY	18795082	18801260	L1PA5	L1PA5	0.807832
chr2	14641576	14647733	L1PA3	L1PA3	0.296682
chr6	99716065	99716921	LTR12	LTR12	0.829365
chr1	158273744	158279784	L1PA4	L1PA4	0.615152
chr13	91146890	91148492	LTR12C	LTR12C	0.773635
chr9	125170912	125177052	L1PA4	L1PA4	0.219536
chr1	25833076	25839210	L1PA2	L1PA2	0.123467
chr17	56150627	56152611	SVA_D	SVA_D	0.428875
chrX	64281028	64287480	L1PA8	L1PA8	0.939389
chr14	83614621	83615274	LTR12_	LTR12_	0.891501
chr7	102678276	102683990	L1P2	L1P2	0.754542
chr14	85818381	85819870	SVA_D	SVA_D	0.555796
chr10	87596004	87602239	L1PA13	L1PA13	1.00016
chr2	76924631	76925811	LTR12C	LTR12C	0.99537
chr12	58058224	58060126	SVA_A	SVA_A	0.77525
chr2	130086935	130087444	LTR12F	LTR12F	1.00244
chr3	139123404	139129585	L1PA6	L1PA6	0.637066
chr4	158078497	158084602	L1PA5	L1PA5	0.716403
chr12	121513114	121515417	SVA_D	SVA_D	0.465729
chr2	38163045	38169498	L1PA7	L1PA7	0.930269
chr16	12697669	12703621	L1PA4	L1PA4	0.922932
chr1	75723433	75729829	L1PA7	L1PA7	0.876906
chr3	143381175	143387330	L1PA5	L1PA5	0.713295
chr11	79210272	79211876	SVA_B	SVA_B	0.644947
chr7	139204121	139205837	SVA_D	SVA_D	0.450495
chr5	27883997	27890129	L1PA6	L1PA6	0.789456
chrX	111483904	111490081	L1PA6	L1PA6	0.799408
chr18	1083911	1090064	L1PB1	L1PB1	0.955724
chr3	137352556	137358574	L1PA2	L1PA2	0.0738425
chr12	38425235	38431370	L1PA4	L1PA4	0.711516
chr5	79596364	79598167	SVA_D	SVA_D	0.403993
chr9	39803639	39809201	L1PA4	L1PA4	0.0593189
chr1	181817964	181824340	L1PA8A	L1PA8A	0.976737
chr5	53011533	53017995	L1PA8	L1PA8	0.925181
chr5	32552435	32553429	LTR12D	LTR12D	0.978747
chrY	17264889	17270934	L1PA3	L1PA3	0.702439
chr5	68160781	68167271	L1PA7	L1PA7	0.820501
chr10	34324148	34325659	LTR12C	LTR12C	0.77888
chr2	182009498	182010751	LTR12D	LTR12D	1.00087
chr12	47030690	47037158	L1PA14	L1PA14	1.00016
chr4	41272438	41278571	L1PA4	L1PA4	0.326537
chr4	63688895	63689432	LTR12B	LTR12B	0.716247
chrX	27317339	27323800	L1PA7	L1PA7	0.875648
chr6	58516329	58517729	SVA_B	SVA_B	0.803846
chr2	125113883	125119911	L1PA2	L1PA2	0.166329
chrX	137860469	137866490	L1PA3	L1PA3	0.262456
chr5	43667377	43673524	L1PA5	L1PA5	0.482223
chr7	109327193	109333330	L1PA4	L1PA4	0.50439
chr4	14482375	14488451	L1PA2	L1PA2	0.226406
chrX	63821328	63827492	L1PA6	L1PA6	0.891491
chr2	104232965	104233455	LTR12F	LTR12F	1.00256
chr21	19129042	19130470	LTR12C	LTR12C	0.715361
chr5	16990214	16991611	LTR12C	LTR12C	0.821897
chr2	129901394	129902369	LTR12D	LTR12D	1.00114
chrX	55832507	55838615	L1PA4	L1PA4	0.662949
chr6	140435862	140442030	L1PA6	L1PA6	0.765326
chr8	53419031	53425178	L1PA5	L1PA5	0.505705
chr3	68876041	68882476	L1PA7	L1PA7	0.800158
chr2	137828134	137834307	L1PA4	L1PA4	0.408694
chr8	86880514	86886632	L1PA5	L1PA5	0.626288
chr4	38325654	38327085	LTR12C	LTR12C	0.947408
chr9	96544560	96552192	L1MA2	L1MA2	0.998008
chr7	26804468	26810530	L1P3	L1P3	0.848708
chr11	28912105	28913521	LTR12C	LTR12C	0.915653
chr4	46569145	46575287	L1PA3	L1PA3	0.4952
chr2	164306758	164307475	LTR12	LTR12	0.839546
chr12	74796541	74797682	LTR12C	LTR12C	0.740634
chrX	112440376	112446614	L1PA10	L1PA10	0.989736
chr20	6308366	6314707	L1PB1	L1PB1	0.967633
chr19	33527361	33528763	LTR12C	LTR12C	0.75192
chr6	109855807	109861931	L1PA5	L1PA5	0.542995
chr5	19142173	19143443	LTR12E	LTR12E	0.671795
chr5	66614517	66615829	LTR12C	LTR12C	0.834983
chr13	48137748	48144156	L1PA7	L1PA7	0.906627
chr2	148442880	148444366	LTR12C	LTR12C	0.847763
chr4	147271170	147277203	L1PA2	L1PA2	0.114108
chr6	20239113	20240334	LTR12C	LTR12C	0.93488
chr6	140694355	140695864	SVA_C	SVA_C	0.699077
chr7	115224595	115230710	L1PB1	L1PB1	0.970075
chrX	72648463	72654587	L1PA4	L1PA4	0.610226
chr3	34121203	34127336	L1PA5	L1PA5	0.622079
chr1	69617484	69624033	L1PB4	L1PB4	1.00016
chr1	189481800	189488187	L1PA10	L1PA10	0.999046
chr11	50152913	50159075	L1PA4	L1PA4	0.704718
chr17	58838576	58844691	L1PA6	L1PA6	0.650208
chr18	9296673	9298314	LTR12C	LTR12C	0.988968
chr11	25665338	25671332	L1PA3	L1PA3	0.413132
chr11	103006960	103013082	L1PA3	L1PA3	0.332448
chrX	138319636	138326339	L1PA11	L1PA11	0.992125
chr4	46700709	46702292	LTR12C	LTR12C	0.905597
chr3	99451990	99458087	L1PA3	L1PA3	0.24729
chr13	52264332	52270465	L1PA3	L1PA3	0.22178
chr14	47640857	47647012	L1PA3	L1PA3	0.336746
chr5	111161777	111162355	LTR12_	LTR12_	1.00209
chr11	104281224	104281675	LTR12F	LTR12F	1.00285
chr4	55498521	55499775	LTR12C	LTR12C	0.840555
chr22	30462055	30463514	SVA_C	SVA_C	0.302428
chr4	112068201	112074352	L1PA3	L1PA3	0.372335
chr9	84345450	84346055	LTR12F	LTR12F	0.986139
chr1	149196673	149198801	SVA_D	SVA_D	0.266272
chr1	113396310	113397706	LTR12C	LTR12C	0.729938
chr3	6324639	6331437	L1PA16	L1PA16	1.00015
chr15	63390454	63391984	SVA_D	SVA_D	0.406294
chr5	98373017	98379464	L1PA7	L1PA7	0.856625
chr5	93321102	93322730	SVA_B	SVA_B	0.683901
chr12	18176733	18182848	L1PA4	L1PA4	0.592519
chr6	87711822	87712522	LTR12	LTR12	0.976667
chr19_gl000208_random	65276	71304	L1PA3	L1PA3	0.49224
chr5	35104357	35110477	L1PA5	L1PA5	0.605648
chr12	34236175	34242273	L1PA4	L1PA4	0.557519
chr4	91148759	91154783	L1PA3	L1PA3	0.315159
chr5	40417341	40423452	L1PA6	L1PA6	0.821827
chr3	58802004	58808030	L1PA2	L1PA2	0.142086
chr6	16217707	16218792	LTR12C	LTR12C	0.923858
chr13	45167988	45168778	LTR12	LTR12	0.928986
chr4	18160032	18161457	LTR12C	LTR12C	0.929057
chrY	15116155	15122314	L1PA5	L1PA5	0.73692
chr12	55991876	55997993	L1PA4	L1PA4	0.514542
chr17	59229378	59229865	LTR12F	LTR12F	0.883721
chr7	10706116	10712459	L1PA8A	L1PA8A	0.959314
chr12	20935850	20937279	LTR12C	LTR12C	0.656132
chr5	19307026	19307848	LTR12	LTR12	0.914127
chr4	53836198	53842349	L1PA4	L1PA4	0.364898
chr15	76884862	76891291	L1PA7	L1PA7	0.88687
chr2	159379129	159385161	L1PA2	L1PA2	0.0977748
chr6	123503371	123509774	L1PA8	L1PA8	0.964303
chr4	72813320	72819414	L1PA6	L1PA6	0.783116
chr12	20820769	20826793	L1PA3	L1PA3	0.174038
chrX	116098799	116104803	L1PA2	L1PA2	0.193767
chr3	104498148	104498717	LTR12F	LTR12F	1.00213
chr13	33931933	33933665	LTR12C	LTR12C	0.504289
chr1	223289507	223290833	LTR12C	LTR12C	1.00082
chr8	100174642	100176190	LTR12C	LTR12C	0.437155
chr9	79142747	79143989	LTR12D	LTR12D	0.923818
chr10	75976638	75982779	L1PA3	L1PA3	0.178613
chr2	241483911	241489939	L1PA3	L1PA3	0.135459
chr2	206841781	206843153	LTR12C	LTR12C	0.93239
chrX	148259696	148265715	L1HS	L1HS	0.0736611
chr2	216683744	216690200	L1PA7	L1PA7	0.882316
chr1	59088920	59090506	LTR12C	LTR12C	0.549125
chr9	12309535	12315966	L1PA8	L1PA8	0.968094
chr1	220019637	220025911	L1PB2	L1PB2	0.99919
chrX	137155601	137161711	L1PA5	L1PA5	0.643594
chrY	21319944	21326044	L1PA6	L1PA6	0.985167
chrUn_gl000214	39518	45655	L1PA3	L1PA3	0.478052
chr2	85682437	85682923	LTR12F	LTR12F	0.943005
chrX	92722451	92729682	L1PA16	L1PA16	1.00014
chr3	82154035	82160193	L1PA3	L1PA3	0.344173
chr2	173553595	173554037	LTR12F	LTR12F	1.00292
chr10	21226382	21232531	L1PA4	L1PA4	0.460737
chr5	38625701	38631849	L1PA3	L1PA3	0.284722
chr6	30189273	30190470	SVA_A	SVA_A	0.0136737
chrY	21317309	21317955	LTR12F	LTR12F	0.981685
chr8	105752079	105758101	L1HS	L1HS	0.0518406
chr5	74427159	74432997	L1PA5	L1PA5	0.633322
chr10	69146802	69152827	L1PA3	L1PA3	0.245401
chr3	97260938	97267055	L1PA4	L1PA4	0.438923
chr3	33712946	33719206	L1PA3	L1PA3	0.250162
chr1	96202755	96208691	L1PB1	L1PB1	0.979781
chr3	96016389	96017015	LTR12	LTR12	0.998099
chr14	60989977	60996142	L1PA6	L1PA6	0.750371
chr10	19377514	19383547	L1HS	L1HS	0.0244396
chr13	107430593	107436752	L1PA3	L1PA3	0.199373
chr12	34629238	34635390	L1PA3	L1PA3	0.710344
chr3	102973164	102974799	SVA_D	SVA_D	0.398046
chr15	45168097	45168573	LTR12F	LTR12F	1.00266
chr6_ssto_hap7	180406	181852	LTR12C	LTR12C	0.0089153
chr5	96636670	96637999	LTR12C	LTR12C	0.786819
chr3	48102670	48104004	SVA_C	SVA_C	0.481361
chr10	9098534	9099692	LTR12D	LTR12D	0.889414
chrX	79182296	79188325	L1PA2	L1PA2	0.131725
chr5	112954441	112955199	LTR12	LTR12	0.87386
chr8	48210046	48216171	L1PA4	L1PA4	0.190207
chr8	109942711	109948816	L1PA3	L1PA3	0.287594
chr14	64503851	64505606	SVA_D	SVA_D	0.448943
chr10	45754728	45756436	SVA_D	SVA_D	0.42102
chr15	44330755	44337117	L1PA7	L1PA7	0.790323
chr7	91105999	91112134	L1PA3	L1PA3	0.281856
chrX	73631802	73633213	SVA_C	SVA_C	0.395118
chrX	97594049	97600496	L1MA4A	L1MA4A	1.00016
chrY	26440568	26446586	L1PA2	L1PA2	0.0302467
chr12	32678424	32679852	LTR12C	LTR12C	0.59488
chr9	87903780	87905378	LTR12C	LTR12C	0.9753
chr4	29118792	29120243	LTR12C	LTR12C	0.877868
chr3	84883917	84884565	LTR12_	LTR12_	1.00182
chr3	86752450	86758654	L1PA6	L1PA6	0.87713
chr4	68502084	68503653	SVA_C	SVA_C	0.558203
chr6_cox_hap2	3329221	3330449	LTR12C	LTR12C	0.00531915
chr3	132459988	132466156	L1PA6	L1PA6	0.670237
chrX	86287660	86289003	SVA_B	SVA_B	0.760257
chr20	18848070	18854498	L1PA7	L1PA7	0.918774
chr4	106650900	106656987	L1PA5	L1PA5	0.621346
chr4	92095973	92101833	L1PA5	L1PA5	0.746354
chr14	32986519	32992533	L1PA5	L1PA5	0.630538
chr18	7203194	7204272	SVA_B	SVA_B	0.530675
chr5	81119358	81120628	LTR12C	LTR12C	0.722222
chr3	4216249	4222368	L1PA6	L1PA6	0.785845
chrX	54154909	54156495	SVA_D	SVA_D	0.356662
chr2	56286836	56293138	L1PA7	L1PA7	0.883586
chr19	55091667	55097367	L1HS	L1HS	0.658214
chr15	51709413	51715443	L1HS	L1HS	0.049747
chr5	164468727	164473559	L1PA5	L1PA5	0.642223
chrY	9760802	9761500	LTR12_	LTR12_	1.00167
chr4	17767331	17768991	LTR12C	LTR12C	0.885897
chr1	196905092	196911229	L1PA6	L1PA6	0.536525
chr4	47919064	47925128	L1PA6	L1PA6	0.739604
chr11	98618646	98624732	L1PA7	L1PA7	0.909455
chr6_mann_hap4	1537756	1538953	SVA_A	SVA_A	0.103008
chr4	5763641	5769655	L1PA3	L1PA3	0.26581
chr5	99761053	99761477	LTR12F	LTR12F	1.00309
chr3	39408135	39414254	L1PA4	L1PA4	0.372487
chr3	25972677	25979098	L1PA7	L1PA7	0.897959
chr15	40366151	40367535	LTR12C	LTR12C	0.693146
chr5	65798940	65800380	LTR12C	LTR12C	0.900746
chr11	50653605	50659777	L1PA3	L1PA3	0.824769
chr4	33336037	33342814	L1PB4	L1PB4	1.00015
chr8	80288621	80290022	LTR12C	LTR12C	0.885473
chr13	93889007	93895677	L1PB3	L1PB3	1.00015
chr14	37656970	37663166	L1PA6	L1PA6	0.776411
chr3	159140855	159146997	L1PA3	L1PA3	0.307349
chr14	71402847	71408975	L1PA5	L1PA5	0.540644
chr1	80354296	80360416	L1PA3	L1PA3	0.685714
chr7	91085676	91086224	LTR12	LTR12	0.986607
chr1	116839822	116841165	LTR12C	LTR12C	0.976669
chr2	184714250	184720277	L1PA3	L1PA3	0.26742
chr12	99857085	99863228	L1PA3	L1PA3	0.294059
chr6	122601546	122603005	LTR12C	LTR12C	0.842531
chr1	114176182	114182002	L1PA3	L1PA3	0.173252
chr7	88180340	88186375	L1PA3	L1PA3	0.26588
chr3	54318982	54325099	L1PA4	L1PA4	0.349842
chr10	83621696	83622998	LTR12C	LTR12C	0.910982
chr10	65775099	65781307	L1PA4	L1PA4	0.40668
chr6	96206262	96212288	L1PA2	L1PA2	0.149342
chr4	18560735	18567144	L1PA8	L1PA8	0.946426
chr15	26218252	26218860	LTR12_	LTR12_	1.00197
chr16	33451829	33457307	L1PA7	L1PA7	0.554109
chr2	41562547	41563835	LTR12C	LTR12C	0.641414
chr8	98051716	98057861	L1PA3	L1PA3	0.270471
chr9	17353751	17355177	LTR12C	LTR12C	0.740573
chr11	48207301	48213446	L1PA3	L1PA3	0.492308
chr3	157737465	157743493	L1HS	L1HS	0.0769231
chr8	139054819	139060825	L1PA3	L1PA3	0.228581
chr1	94376292	94382332	L1PA6	L1PA6	0.667677
chr3	106694291	106700323	L1PA2	L1PA2	0.107384
chr8	102903728	102909757	L1PA2	L1PA2	0.232923
chr8	127353830	127359842	L1PA3	L1PA3	0.23613
chr4	28117996	28119327	LTR12C	LTR12C	0.998375
chr8	61072921	61079076	L1PA3	L1PA3	0.306689
chr6	51955741	51961901	L1PA3	L1PA3	0.278053
chr3	68859369	68865476	L1PA4	L1PA4	0.512069
chr10	68990423	68996432	L1PA3	L1PA3	0.32442
chr8	42430184	42431639	LTR12C	LTR12C	0.859041
chr2	117046714	117047190	LTR12F	LTR12F	1.00266
chrX	23256633	23262692	L1HS	L1HS	0.0765229
chr10	54490115	54496287	L1PA3	L1PA3	0.299736
chr3	69394011	69400144	L1PA5	L1PA5	0.514835
chr8	93569261	93575201	L1PA6	L1PA6	0.742637
chr2	36324751	36330283	L1PA3	L1PA3	0.363218
chr6_mann_hap4	3162533	3163761	LTR12C	LTR12C	0.0106383
chr6_mcf_hap5	3278933	3280774	SVA_D	SVA_D	0.000574383
chr7	108028013	108034176	L1PA5	L1PA5	0.465446
chrX	118883801	118885356	LTR12C	LTR12C	0.672852
chr5	31777035	31778856	LTR12C	LTR12C	0.844858
chr4	178416565	178417991	LTR12C	LTR12C	0.779789
chr8	88805372	88811613	L1PA6	L1PA6	0.778049
chr11	67243380	67244705	LTR12C	LTR12C	0.879184
chr5	55553509	55554710	SVA_B	SVA_B	0.537693
chr4	18091867	18098419	L1PA5	L1PA5	0.495505
chr4	35459246	35464331	L1PA16	L1PA16	0.990772
chr1	66117365	66123766	L1PA7	L1PA7	0.851611
chr15	57071643	57073066	LTR12C	LTR12C	0.953137
chr12	65424252	65430361	L1PA5	L1PA5	0.614578
chr6	74612703	74614002	LTR12C	LTR12C	0.920767
chr15	31027837	31034214	L1PB1	L1PB1	0.739844
chr4	40148530	40150122	SVA_D	SVA_D	0.5563
chr3	86331217	86332767	LTR12C	LTR12C	0.994483
chr2	154674410	154680938	L1PA15-16	L1PA15-16	1.00016
chr15	45326849	45328464	LTR12E	LTR12E	0.839604
chr12	68452293	68458606	L1PA10	L1PA10	0.956382
chr3	59206569	59212504	L1PA6	L1PA6	0.679177
chr10	53370828	53377153	L1MA4A	L1MA4A	0.977831
chr4	142179566	142187072	L1MA3	L1MA3	1.00014
chr1	197038119	197038783	LTR12_	LTR12_	0.909574
chr8	42793876	42795676	SVA_D	SVA_D	0.404118
chr15	41443693	41445042	LTR12C	LTR12C	0.948759
chrX	112330776	112336905	L1PB1	L1PB1	0.956378
chr4	80042904	80044242	LTR12C	LTR12C	0.71567
chrX	69734968	69741123	L1PA5	L1PA5	0.640132
chr1	202159959	202161610	SVA_D	SVA_D	0.179884
chr13	51342424	51348541	L1PA6	L1PA6	0.616753
chr10	67188249	67189739	LTR12C	LTR12C	0.783453
chr21	24393411	24394208	LTR12D	LTR12D	1.00143
chr15	85977194	85983196	L1PA2	L1PA2	0.095222
chrX	148517368	148523361	L1PA3	L1PA3	0.145936
chr17	11764342	11770489	L1PA3	L1PA3	0.186704
chr1	99865380	99871529	L1PA3	L1PA3	0.378079
chrX	108991223	108993114	LTR12C	LTR12C	0.669458
chr12	123160311	123161709	LTR12C	LTR12C	0.869029
chr3	162561393	162562942	LTR12C	LTR12C	0.995169
chr17	16048193	16049620	SVA_B	SVA_B	0.798794
chr12	58865189	58871337	L1PA3	L1PA3	0.363591
chr4	91074035	91080175	L1PA3	L1PA3	0.346523
chr11	107232536	107238565	L1PA2	L1PA2	0.157025
chr3	153805643	153807313	LTR12C	LTR12C	0.824204
chr9	17263042	17269179	L1PA4	L1PA4	0.528243
chr5	50359134	50365340	L1PA8	L1PA8	0.995414
chr5	18471925	18477943	L1PA3	L1PA3	0.248057
chr4	56485331	56491348	L1PA2	L1PA2	0.037012
chr7	51661706	51667843	L1PA4	L1PA4	0.41345
chr4	53667817	53674351	L1PA8	L1PA8	0.876593
chr7	28877844	28879152	SVA_D	SVA_D	0.165563
chr13	31756325	31757711	LTR12C	LTR12C	0.864697
chr2	178914098	178920237	L1PA5	L1PA5	0.481537
chr4	144087609	144093743	L1PA4	L1PA4	0.499006
chr9	69613357	69614599	LTR12C	LTR12C	0.0875657
chr14	32169576	32171051	LTR12C	LTR12C	0.881455
chrX	72240700	72242672	SVA_A	SVA_A	0.811966
chr4	49009493	49015638	L1PA6	L1PA6	0.834739
chr2	17626729	17632989	L1PA8	L1PA8	0.956656
chr6	144753814	144755474	SVA_D	SVA_D	0.258333
chr5	180798608	180805030	L1PA7	L1PA7	0.000474533
chr11	29092289	29098619	L1PB1	L1PB1	0.979615
chr14	36611862	36617896	L1PA3	L1PA3	0.165319
chr6	105118662	105125088	L1PA7	L1PA7	0.866266
chr22	38805407	38806730	SVA_B	SVA_B	0.347506
chr7	34028231	34034248	L1PA2	L1PA2	0.135204
chr11	48469601	48475634	L1PA7	L1PA7	0.825046
chr5	43665344	43666731	SVA_B	SVA_B	0.731158
chr11	105743658	105750070	L1PA7	L1PA7	0.8609
chr3	154592819	154598937	L1PA7	L1PA7	0.846627
chr12	46393389	46394911	SVA_A	SVA_A	0.582278
chr6	46372782	46374066	LTR12C	LTR12C	0.627534
chr18	12775720	12777415	LTR12C	LTR12C	0.975549
chr20	42500002	42505911	L1PA5	L1PA5	0.471854
chr2	193643227	193643912	LTR12_	LTR12_	1.00171
chr11	87973662	87979788	L1PA5	L1PA5	0.588616
chr5	175703449	175709587	L1PA2	L1PA2	0.241636
chr6	77453343	77455230	SVA_F	SVA_F	0.509233
chr4	92383525	92389664	L1PA5	L1PA5	0.667329
chr2	124556173	124562283	L1PA6	L1PA6	0.711148
chr5	8159175	8164702	L1PA3	L1PA3	0.222406
chr12	105639631	105645748	L1PA4	L1PA4	0.23633
chr22	19181161	19181768	LTR12_	LTR12_	0.962525
chr11	48571039	48577087	L1PA6	L1PA6	0.87811
chr7	87706679	87712810	L1PA4	L1PA4	0.40524
chr15	65367179	65368926	LTR12C	LTR12C	0.583485
chr5	35568327	35574348	L1PA3	L1PA3	0.236447
chr1	88807525	88813550	L1PA2	L1PA2	0.114093
chr3	162419637	162421272	LTR12C	LTR12C	0.874267
chr3	2465748	2471825	L1PA5	L1PA5	0.679772
chr4	70902642	70904173	SVA_B	SVA_B	0.707897
chr10	64706812	64708849	SVA_E	SVA_E	0.25968
chr1	96003556	96004231	LTR12	LTR12	1.00174
chr6	18354013	18359564	L1PA5	L1PA5	0.528527
chr5	61808434	61810466	SVA_D	SVA_D	0.344203
chr6	57316567	57322730	L1PA4	L1PA4	0.424872
chr1	173619247	173625381	L1PA6	L1PA6	0.772788
chrX	73694313	73700466	L1PA4	L1PA4	0.437965
chr5	146985069	146991203	L1PA7	L1PA7	0.854657
chr8	49419610	49420443	LTR12	LTR12	0.956344
chr9	17154591	17155278	LTR12_	LTR12_	0.751278
chrX	127740409	127741795	LTR12C	LTR12C	0.879471
chr10	33979836	33985667	L1PA7	L1PA7	0.943989
chr6	45248844	45254990	L1PA4	L1PA4	0.550116
chr1	199616490	199622600	L1PA5	L1PA5	0.559235
chr1	98977339	98979223	SVA_D	SVA_D	0.463004
chr1	174202404	174208431	L1PA2	L1PA2	0.113211
chr14	70721260	70722899	LTR12C	LTR12C	0.983756
chr7	128328825	128330475	SVA_C	SVA_C	0.474839
chr14	86540833	86546861	L1PA3	L1PA3	0.317139
chrY	17064635	17070880	L1PA3	L1PA3	0.776241
chr4	139442621	139448775	L1PA16	L1PA16	1.00017
chr12	45344741	45350771	L1PA2	L1PA2	0.0623946
chr5	100265792	100271932	L1PA5	L1PA5	0.633609
chr3	60912630	60913998	SVA_B	SVA_B	0.818612
chr5	24314245	24315658	LTR12D	LTR12D	0.973343
chr13	26086028	26088146	SVA_D	SVA_D	0.499504
chr2	23959438	23965581	L1PA4	L1PA4	0.342214
chr20	21990070	21996234	L1PA3	L1PA3	0.418865
chr1	150753325	150755021	SVA_F	SVA_F	0.177318
chr19	50643656	50645130	SVA_D	SVA_D	0.517467
chr7	34470939	34477065	L1PA6	L1PA6	0.737139
chr12	30208276	30209013	LTR12	LTR12	0.949765
chr1	188721347	188727391	L1PA2	L1PA2	0.230316
chr9	77955485	77961641	L1PA4	L1PA4	0.439069
chr10	66544100	66545104	LTR12	LTR12	0.952434
chr18	10505430	10507404	SVA_B	SVA_B	0.697972
chr10	101172275	101177819	L1PA5	L1PA5	0.374173
chr4	132834514	132835004	LTR12F	LTR12F	0.889744
chr13	85778866	85780269	LTR12C	LTR12C	0.962394
chr7	19581910	19588324	L1PA7	L1PA7	0.870763
chr9	86562427	86564023	SVA_B	SVA_B	0.713235
chr5	45881331	45887313	L1PA3	L1PA3	0.515131
chr6	17341011	17341736	LTR12_	LTR12_	0.9072
chr7	96181507	96187526	L1PA2	L1PA2	0.246325
chr17	6705800	6711933	L1PA4	L1PA4	0.373778
chr1	50460302	50466683	L1PB1	L1PB1	0.995861
chr9	32149071	32155111	L1PA3	L1PA3	0.283333
chr18	10650015	10656100	L1PA5	L1PA5	0.540518
chr5	92858250	92864748	L1PA8	L1PA8	0.826196
chr8	80894511	80900667	L1PA3	L1PA3	0.332232
chr1	106500587	106501237	LTR12B	LTR12B	1.00182
chr16	59106162	59112307	L1PA4	L1PA4	0.547229
chr1	242332442	242338355	L1PA5	L1PA5	0.722174
chrX	72501213	72507338	L1PA4	L1PA4	0.603651
chr10	113343685	113349706	L1PA2	L1PA2	0.0499916
chr3	136929873	136936014	L1PA6	L1PA6	0.629366
chr20	18916488	18922956	L1PA7	L1PA7	0.903109
chrX	138078225	138084512	L1PA7	L1PA7	0.847099
chr1	92490912	92492465	SVA_B	SVA_B	0.77426
chrX	24067626	24069265	LTR12C	LTR12C	0.604938
chr4	143986786	143993141	L1PA10	L1PA10	0.970424
chr6_ssto_hap7	2115273	2116863	LTR12C	LTR12C	0.00469799
chrX	63351758	63357787	L1PA3	L1PA3	0.341036
chr4	71950122	71956213	L1PA4	L1PA4	0.474378
chr5	36508123	36514272	L1PA6	L1PA6	0.751694
chr6_cox_hap2	1997626	1999031	LTR12D	LTR12D	0.00229885
chr1	79311129	79317159	L1PA2	L1PA2	0.0173693
chr14	45789445	45795578	L1PA5	L1PA5	0.625725
chr8	34910687	34911414	LTR12	LTR12	0.939394
chr12	117192162	117198668	L1PB1	L1PB1	0.856697
chr9	108547356	108553491	L1PA5	L1PA5	0.568683
chr3	121529838	121536285	L1PA8	L1PA8	0.841342
chr4	161041369	161047367	L1PA3	L1PA3	0.244829
chr5	109614337	109620497	L1PA4	L1PA4	0.486964
chr12	29321454	29322098	LTR12	LTR12	1.00184
chrUn_gl000211	131855	133493	SVA_C	SVA_C	0.63329
chr10	78605968	78612092	L1PA3	L1PA3	0.346946
chr5	49625903	49632070	L1PA4	L1PA4	0.664744
chr1	96128918	96129662	LTR12	LTR12	0.923913
chr13	27793725	27794954	LTR12D	LTR12D	0.949513
chr1	54468889	54470460	LTR12C	LTR12C	0.78654
chr18	50781584	50787721	L1PA4	L1PA4	0.582077
chr5	43718055	43724076	L1PA2	L1PA2	0.178686
chr12	14232993	14238495	L1PA6	L1PA6	0.516475
chr6	75670096	75676251	L1PBa	L1PBa	0.998844
chr2	173179998	173186025	L1HS	L1HS	0.00860469
chr3	12809488	12810923	LTR12C	LTR12C	0.917603
chr15	43296542	43298302	SVA_B	SVA_B	0.622892
chr4	28829436	28831028	LTR12C	LTR12C	0.937668
chr17	1149817	1151244	SVA_D	SVA_D	0.385079
chr15	45584609	45586200	SVA_D	SVA_D	0.280349
chr14	52674892	52681010	L1PA5	L1PA5	0.526753
chr7	147498419	147499862	SVA_D	SVA_D	0.278481
chr7	131663116	131669242	L1PA4	L1PA4	0.415035
chr10	38952320	38958461	L1PA5	L1PA5	0.61066
chr13	59865526	59871982	L1PA7	L1PA7	0.838263
chr5	162074133	162074568	LTR12F	LTR12F	1.00299
chr10	25536243	25542269	L1PA2	L1PA2	0.101586
chr3	99307880	99313833	L1PA6	L1PA6	0.72954
chr8	129394665	129395120	LTR12F	LTR12F	1.00282
chr13	48037441	48043793	L1PA8A	L1PA8A	0.973448
chr12	55170553	55176666	L1PA5	L1PA5	0.58174
chr6	105786298	105792083	L1PA5	L1PA5	0.690413
chr5	22934977	22935489	LTR12F	LTR12F	0.912621
chrX	125904772	125910690	L1PB1	L1PB1	1.00017
chr7	55644881	55651006	L1PA5	L1PA5	0.534772
chrX	51170300	51176451	L1PA3	L1PA3	0.212031
chr4	175333047	175339190	L1PA4	L1PA4	0.548569
chr21	41950207	41950704	LTR12	LTR12	0.952141
chr18	56923880	56930013	L1PA4	L1PA4	0.439914
chr12	49308893	49310439	SVA_D	SVA_D	0.0477178
chr13	52981339	52982780	LTR12C	LTR12C	0.934377
chr6	16039728	16041104	LTR12C	LTR12C	0.835423
chr6	50777162	50778528	SVA_C	SVA_C	0.665877
chrX	80520707	80526881	L1PA7	L1PA7	0.797498
chr4	165551306	165557833	L1PA7	L1PA7	0.883927
chr9	39274392	39279951	L1PA4	L1PA4	0.0483605
chr12	49016472	49017165	LTR12	LTR12	0.821248
chrX	35648522	35654942	L1PA7	L1PA7	0.832595
chr2	140167728	140168937	LTR12C	LTR12C	0.888188
chr14	26575629	26581630	L1PA3	L1PA3	0.307067
chr15	56426816	56432826	L1PA2	L1PA2	0.179526
chr6	128906833	128914485	L1MA1	L1MA1	0.994174
chr5	101045972	101052109	L1PA6	L1PA6	0.822594
chr7	97242968	97249000	L1HS	L1HS	0.0544504
chr3	9981015	9982408	SVA_D	SVA_D	0.393658
chr12	96709720	96715749	L1PA2	L1PA2	0.151628
chrX	83192923	83199688	L1PREC2	L1PREC2	1.00015
chr2	197569279	197575363	L1PA6	L1PA6	0.73496
chr6	14916040	14917384	LTR12C	LTR12C	0.977492
chr12	90541274	90541913	LTR12_	LTR12_	0.684601
chr10	5287317	5293348	L1HS	L1HS	0.0178722
chr12	119106387	119112538	L1PA6	L1PA6	0.68468
chr1	164185258	164191422	L1PA3	L1PA3	0.374505
chr14	26068719	26069460	LTR12	LTR12	0.99688
chr2	157226774	157232901	L1PA5	L1PA5	0.566285
chrY	26209794	26216000	L1PA4	L1PA4	0.0289879
chr8	109512528	109518674	L1PA4	L1PA4	0.310453
chr7	49493109	49494367	LTR12C	LTR12C	0.870466
chr6	76989697	76994007	L1PA7	L1PA7	0.956532
chr4	66859017	66865020	L1PA2	L1PA2	0.264611
chr18	27754189	27755629	LTR12C	LTR12C	0.949254
chr6	104828765	104835069	L1PA17	L1PA17	1.00016
chr13	43539957	43541435	SVA_F	SVA_F	0.0783745
chr5	123548864	123555007	L1PA4	L1PA4	0.467979
chr2	62872845	62878861	L1PA3	L1PA3	0.232759
chr5	45890044	45891729	SVA_C	SVA_C	0.697161
chr15	98634768	98640793	L1PA3	L1PA3	0.341772
chr6_cox_hap2	760122	766271	L1PA4	L1PA4	0.0150438
chr8	136859578	136865767	L1PA4	L1PA4	0.460503
chr13	104992699	104998858	L1PA3	L1PA3	0.392309
chr10	37563348	37564808	LTR12C	LTR12C	0.970588
chr12	39193448	39199475	L1HS	L1HS	0.090771
chr7	62319285	62325304	L1PA2	L1PA2	0.376077
chr1	171350019	171351382	LTR12C	LTR12C	0.982581
chr4	60906866	60908493	LTR12C	LTR12C	0.991487
chr6	141489092	141490283	LTR12D	LTR12D	0.872594
chr22	29059271	29065303	L1HS	L1HS	0.0059002
chr8	96564460	96570493	L1PA2	L1PA2	0.0665768
chr1	83729290	83735314	L1PA3	L1PA3	0.216914
chr10	83265399	83266747	LTR12C	LTR12C	0.779647
chr1	67642321	67648459	L1PA4	L1PA4	0.483438
chr1	189194152	189195869	SVA_B	SVA_B	0.603587
chr18	2867370	2868789	SVA_D	SVA_D	0.445792
chr11	43116558	43122701	L1PA3	L1PA3	0.387059
chrX	64444262	64450427	L1PA3	L1PA3	0.428689
chr11	79820418	79826570	L1PA8	L1PA8	0.971084
chr9	72120967	72126986	L1PA2	L1PA2	0.0699442
chr12	96300623	96302230	SVA_D	SVA_D	0.217651
chr3	120091462	120097487	L1PA2	L1PA2	0.103966
chr14	92693776	92699912	L1PA5	L1PA5	0.476309
chr3	101269748	101271340	SVA_A	SVA_A	0.765416
chr12	46583731	46589869	L1PA6	L1PA6	0.797781
chr3	146841992	146848070	L1PA5	L1PA5	0.705587
chr2	166588173	166594204	L1PA2	L1PA2	0.0515933
chr7	77162220	77164102	SVA_D	SVA_D	0.533109
chr6	64035502	64036922	LTR12C	LTR12C	0.802273
chr14	81350705	81357155	L1PA8	L1PA8	0.877953
chr2	25856056	25857939	SVA_D	SVA_D	0.357824
chr8	84989038	84995236	L1PA5	L1PA5	0.723024
chr2	184924845	184931317	L1PA8	L1PA8	0.920747
chr5	57262412	57268576	L1PA4	L1PA4	0.592348
chr11	118558949	118560247	LTR12C	LTR12C	0.869783
chr10	99600726	99602222	SVA_D	SVA_D	0.366046
chr7	54566425	54572577	L1PA4	L1PA4	0.384171
chr20	25310585	25316606	L1PA3	L1PA3	0.176997
chr9	85837820	85843864	L1PA2	L1PA2	0.166386
chr2	167542345	167548449	L1PA5	L1PA5	0.66539
chr3	54492800	54498947	L1PA3	L1PA3	0.388457
chr2	214218623	214224628	L1PA6	L1PA6	0.81287
chr6	30398057	30404207	L1PA6	L1PA6	0.00561983
chr1	87123125	87129294	L1PA6	L1PA6	0.737848
chr4	60757701	60763830	L1PA5	L1PA5	0.838282
chr13	35557172	35562775	L1PA6	L1PA6	0.746138
chr3	70334207	70340234	L1PA3	L1PA3	0.265902
chr1	180835947	180841979	L1HS	L1HS	0.0268038
chrX	118495324	118497001	SVA_D	SVA_D	0.320862
chrX	110141622	110147695	L1PA6	L1PA6	0.842793
chrX	55795354	55801477	L1PA6	L1PA6	0.707787
chr2	82552413	82553884	LTR12C	LTR12C	0.870168
chr4	131123688	131124354	LTR12_	LTR12_	0.980565
chr8	54687525	54689024	LTR12C	LTR12C	0.691923
chr7	50966539	50972571	L1PA2	L1PA2	0.146999
chr6	81557456	81563493	L1PA3	L1PA3	0.326933
chr10	33799773	33805804	L1HS	L1HS	0.0323723
chr16	18000282	18006450	L1PA5	L1PA5	0.415129
chrY	15375709	15381432	L1PA7	L1PA7	0.98186
chrX	56450492	56456641	L1PA6	L1PA6	0.852703
chr8	98494340	98500000	L1PA6	L1PA6	0.697662
chr7	134768965	134776042	L1MA5	L1MA5	1.00014
chr4	135422653	135424082	LTR12C	LTR12C	0.982694
chr14	46630343	46636485	L1PA4	L1PA4	0.613373
chr3	71380101	71381632	LTR12C	LTR12C	0.935709
chr6	144815259	144816842	LTR12C	LTR12C	0.5118
chr8	99722384	99728522	L1PA4	L1PA4	0.489566
chrX	96454934	96461334	L1PA8	L1PA8	0.908095
chr5	24654830	24661004	L1PA6	L1PA6	0.797827
chrX	69430252	69436385	L1PA4	L1PA4	0.390187
chr6	67198837	67205047	L1PA7	L1PA7	0.93126
chr10	118256137	118256782	LTR12_	LTR12_	0.983486
chr3	94659768	94666063	L1PA8A	L1PA8A	0.966102
chr5	95639168	95645610	L1PA7	L1PA7	0.870388
chr2	126422295	126422971	LTR12_	LTR12_	1.00174
chr6	120108743	120109422	LTR12_	LTR12_	0.981002
chrX	71660443	71666537	L1PA3	L1PA3	0.249082
chr4	161583303	161583980	LTR12_	LTR12_	0.746967
chrX	37627864	37634014	L1PA4	L1PA4	0.37719
chr7	45502038	45508239	L1PA4	L1PA4	0.5327
chr1	89938219	89945018	L1PA11	L1PA11	0.998358
chr11	18141977	18143565	SVA_D	SVA_D	0.358871
chr2	43289652	43291201	SVA_D	SVA_D	0.218772
chr2	92089384	92095510	L1PA5	L1PA5	0.549452
chrX	114065260	114071295	L1PA2	L1PA2	0.133109
chrX	136212110	136217779	L1PA7	L1PA7	0.84701
chr4	124458890	124460599	LTR12C	LTR12C	0.799254
chr6	10481931	10483513	LTR12C	LTR12C	1.00067
chr6	18010535	18011979	LTR12C	LTR12C	0.955357
chr6	90763700	90769860	L1PA4	L1PA4	0.383003
chr10	34344299	34345585	LTR12C	LTR12C	0.894604
chr5	161975402	161975908	LTR12F	LTR12F	0.997537
chr2	116806517	116812543	L1PA2	L1PA2	0.0874114
chr1	174346929	174352953	L1PA2	L1PA2	0.0546928
chr2	52801492	52808415	L1PA15-16	L1PA15-16	1.00015
chr10	90109996	90116122	L1PA5	L1PA5	0.642383
chr13	21313051	21314623	LTR12C	LTR12C	0.923913
chr2	181555931	181557152	LTR12C	LTR12C	0.826048
chr3	25282808	25289268	L1PA7	L1PA7	0.954245
chr6_ssto_hap7	323608	325103	LTR12C	LTR12C	0.00143369
chr7	37331517	37333330	SVA_D	SVA_D	0.476941
chr8	96835684	96837359	LTR12C	LTR12C	0.697778
chr11	40726759	40732881	L1PA6	L1PA6	0.753902
chr9	123861304	123866811	L1PA6	L1PA6	0.584428
chr8	58071200	58077214	L1PA3	L1PA3	0.226074
chr6	137390969	137397447	L1PA7	L1PA7	0.826121
chrY	19296635	19298030	LTR12C	LTR12C	0.992278
chr8	2263735	2269787	L1PA2	L1PA2	0.277722
chr5	97145618	97151644	L1PA2	L1PA2	0.209922
chr4	6674267	6675474	LTR12C	LTR12C	0.813008
chr1	227887596	227893472	L1PA7	L1PA7	0.878636
chr4	123936338	123938270	SVA_D	SVA_D	0.343341
chr3	51489936	51496088	L1PA4	L1PA4	0.3346
chr9	25019565	25026319	L1PA8	L1PA8	0.964382
chr16	82172856	82178863	L1PA2	L1PA2	0.15524
chr12	78650227	78652044	L1PA5	L1PA5	0.905649
chr12	11700043	11701326	LTR12C	LTR12C	0.892646
chr12	74000000	74005609	L1PA5	L1PA5	0.619169
chr4	164349268	164350056	LTR12	LTR12	1
chr10	34356418	34362533	L1PA7	L1PA7	0.757273
chr4	167491128	167497159	L1HS	L1HS	0.0408026
chr3	25432395	25439058	L1PB1	L1PB1	0.994972
chr13	75292348	75293806	LTR12C	LTR12C	0.813697
chr1	172772804	172773560	LTR12	LTR12	0.829268
chr6	149018315	149019744	LTR12C	LTR12C	0.924755
chr12	48893514	48895337	SVA_D	SVA_D	0.536274
chrX	154425903	154432046	L1PA3	L1PA3	0.197584
chr9	17210061	17216199	L1PA5	L1PA5	0.624213
chr9	23991700	23997832	L1PA6	L1PA6	0.741214
chr7	152830941	152837393	L1PB1	L1PB1	0.969301
chr15	26290082	26290724	LTR12_	LTR12_	0.9631
chrX	66708175	66714348	L1PA4	L1PA4	0.559855
chr3	84592114	84598303	L1PA16	L1PA16	1.00016
chr2	191957302	191963495	L1PA6	L1PA6	0.677663
chr18	57696910	57702939	L1PA2	L1PA2	0.0645977
chrY	2917958	2924528	L1PB1	L1PB1	0.348686
chr6	144823396	144829828	L1PA7	L1PA7	0.903032
chr3	1955192	1961329	L1PA6	L1PA6	0.829054
chr6	113235567	113241520	L1PA2	L1PA2	0.135486
chr13	90316938	90317714	LTR12	LTR12	1.00148
chr13	48482101	48488245	L1PA6	L1PA6	0.818001
chr11	115875645	115881774	L1PA4	L1PA4	0.433737
chr11	95053389	95055219	SVA_F	SVA_F	0.257225
chr1	47472118	47478240	L1PA5	L1PA5	0.577051
chr1	159700244	159706365	L1PA3	L1PA3	0.505066
chr7	91018808	91024824	L1PA3	L1PA3	0.240027
chr4	103166026	103167311	LTR12C	LTR12C	0.881013
chr4	108593238	108599355	L1PA4	L1PA4	0.482965
chr3	180787138	180793580	L1PA8A	L1PA8A	0.918322
chr2	108363079	108364358	LTR12C	LTR12C	0.636132
chr3	170596345	170602373	L1PA2	L1PA2	0.159919
chrX	22694975	22700721	L1PA5	L1PA5	0.473787
chr7	9438387	9444411	L1PA2	L1PA2	0.185348
chrY	7995730	7997121	LTR12C	LTR12C	0.997676
chr5	111874365	111880800	L1PA7	L1PA7	0.938753
chr5	56647323	56653353	L1PA2	L1PA2	0.129848
chr14	24442498	24442749	LTR12D	LTR12D	1.00662
chr4	105627718	105634094	L1PA7	L1PA7	0.950765
chr6	74964237	74965712	SVA_C	SVA_C	0.586909
chr16	47943808	47949915	L1PA5	L1PA5	0.573331
chr5	102476868	102478283	LTR12C	LTR12C	0.641065
chr3	179008081	179009531	SVA_F	SVA_F	0.157037
chr5	35494286	35500000	L1P2	L1P2	0.387959
chr12	296385	297788	LTR12C	LTR12C	0.892556
chr4	22148050	22154080	L1PA2	L1PA2	0.212648
chr19	23715638	23717190	SVA_C	SVA_C	0.65978
chrX	37487699	37493845	L1PA3	L1PA3	0.283162
chr4	46709559	46710127	LTR12_	LTR12_	0.980769
chrX	50039138	50045279	L1PA4	L1PA4	0.382056
chr15	38428866	38435041	L1PA3	L1PA3	0.280988
chr14	80554870	80561025	L1PA3	L1PA3	0.250702
chrX	134391787	134397897	L1PA6	L1PA6	0.721464
chr1	25929720	25931433	SVA_D	SVA_D	0.34036
chr5	57364112	57365491	LTR12C	LTR12C	0.923378
chr1	56027503	56033642	L1PA4	L1PA4	0.400729
chr10	111296379	111302792	L1PA7	L1PA7	0.911611
chrX	111027680	111033797	L1PA6	L1PA6	0.68456
chr17	69348100	69354041	L1PA3	L1PA3	0.172916
chr8	60989463	60995958	L1PA7	L1PA7	0.865051
chr2	174564103	174570138	L1PA2	L1PA2	0.0773378
chrUn_gl000234	27767	33875	L1PA4	L1PA4	0.77763
chr3	120008379	120009909	LTR12C	LTR12C	0.866434
chr5	14993087	14994479	LTR12C	LTR12C	0.650155
chr13	61897704	61903870	L1PA5	L1PA5	0.698813
chr9	87867083	87873525	L1PA7	L1PA7	0.789656
chr17	66164619	66166062	LTR12C	LTR12C	0.921817
chr12	121169462	121171069	SVA_C	SVA_C	0.363636
chr2	11899333	11900853	SVA_C	SVA_C	0.301408
chr2	27037156	27038455	LTR12C	LTR12C	0.786489
chr9	107251503	107252892	SVA_B	SVA_B	0.459271
chr11	71434773	71440889	L1PA4	L1PA4	0.434342
chrX	89808060	89808801	LTR12	LTR12	0.552262
chr10	31057293	31058906	LTR12C	LTR12C	0.873761
chr4	159666937	159668611	SVA_D	SVA_D	0.334816
chr5	155488941	155494976	L1HS	L1HS	0.0448189
chr12	83122366	83123937	LTR12C	LTR12C	0.96261
chr10	69443397	69444273	LTR12	LTR12	0.81701
chr12	44257518	44258998	LTR12C	LTR12C	0.853623
chr5	115075750	115082666	L1M1	L1M1	0.995892
chr1	76321974	76328103	L1PA7	L1PA7	0.895837
chr15	95901965	95902416	LTR12F	LTR12F	1.00285
chr21	30155904	30157594	LTR12C	LTR12C	0.702516
chr2	35958924	35965407	L1PA11	L1PA11	0.97697
chrY	3998886	3999627	LTR12	LTR12	0.574103
chr17	25538459	25540353	SVA_E	SVA_E	0.121516
chr4	150526838	150533106	L1MA4	L1MA4	1.00016
chr7	44909929	44912260	SVA_A	SVA_A	0.692515
chrX	72045048	72051239	L1PA7	L1PA7	0.0328353
chr3	118720317	118726337	L1PA2	L1PA2	0.100169
chr6	86612753	86618882	L1PA7	L1PA7	0.807265
chr5	53002589	53008983	L1PA11	L1PA11	0.990626
chr16	82237375	82243490	L1PA5	L1PA5	0.629593
chr6	79207128	79213213	L1PA15	L1PA15	0.986967
chrX	76554421	76560561	L1PA6	L1PA6	0.850166
chr7	39233978	39234678	LTR12_	LTR12_	1.00167
chr7	45417106	45423127	L1PA3	L1PA3	0.172099
chr1	177294588	177295393	LTR12	LTR12	0.92766
chr7	83691725	83697752	L1PA2	L1PA2	0.230133
chr14	65669492	65670180	LTR12_	LTR12_	0.986395
chr5	114202125	114208566	L1PA11	L1PA11	0.999842
chr21	18726675	18727166	LTR12F	LTR12F	0.87468
chrX	61962055	61967822	L1PA4	L1PA4	0.78666
chr22	35212790	35218914	L1PA5	L1PA5	0.548971
chr8	21288569	21295013	L1PA7	L1PA7	0.859237
chr5	20526173	20532012	L1PA10	L1PA10	0.995295
chr12	119834644	119836394	LTR12C	LTR12C	0.951515
chrX	54145146	54151177	L1HS	L1HS	0.00168606
chr7	49689334	49695469	L1PA4	L1PA4	0.338028
chr5	9271724	9278082	L1PA7	L1PA7	0.883509
chr5	58306602	58312118	L1PA5	L1PA5	0.577733
chr15	26262506	26263136	LTR12_	LTR12_	1.00189
chr7	159091068	159097213	L1PA4	L1PA4	0.415715
chr7	117762278	117768419	L1PA6	L1PA6	0.837279
chr9	125352423	125358449	L1PA3	L1PA3	0.258691
chr14	66650454	66656585	L1PA5	L1PA5	0.370419
chrY	19551590	19557747	L1PA6	L1PA6	0.982334
chr7	76357802	76363830	L1PA3	L1PA3	0.154352
chr9	6806926	6808710	SVA_F	SVA_F	0.334917
chr8	113606234	113612259	L1PA2	L1PA2	0.100253
chr1	24178934	24180547	SVA_D	SVA_D	0.269663
chr4	104405594	104412044	L1PA7	L1PA7	0.92252
chr6	16265691	16266365	LTR12	LTR12	1.00174
chr3	15203535	15205694	SVA_D	SVA_D	0.275376
chr2	110253515	110254055	LTR12F	LTR12F	1.00227
chr3	135303567	135309597	L1PA2	L1PA2	0.125801
chr13	33176231	33182311	L1PA5	L1PA5	0.640468
chr22	18040308	18041751	SVA_F	SVA_F	0.109456
chr7	111139877	111146036	L1PA4	L1PA4	0.274963
chr5	177199246	177205275	L1HS	L1HS	0.0303593
chr3	110549711	110555268	L1PA7	L1PA7	0.940993
chr1	118541459	118547567	L1PA6	L1PA6	0.790113
chrX	57862986	57863464	LTR12F	LTR12F	1.00265
chr8	113711012	113711663	LTR12	LTR12	0.92196
chr18	22290778	22296805	L1PA2	L1PA2	0.0890839
chrY	22168187	22168808	LTR12	LTR12	1.00192
chr4	44041810	44049214	L1MA2	L1MA2	1.00014
chr8	53759276	53765658	L1PA7	L1PA7	0.840019
chr19	12051084	12052674	LTR12C	LTR12C	0.605369
chr9	81610361	81616027	L1MB7	L1MB7	1.00018
chr4	87329056	87335200	L1PA6	L1PA6	0.779782
chr12	69384829	69390974	L1PA3	L1PA3	0.234739
chr5	764319	766021	LTR12C	LTR12C	0.647316
chrX	109138682	109144857	L1PA4	L1PA4	0.29679
chr3	35518881	35524752	L1PA5	L1PA5	0.653093
chr8	86331079	86337220	L1PA5	L1PA5	0.746069
chr1	242315662	242322074	L1PA7	L1PA7	0.825253
chr1	8213119	8213872	LTR12	LTR12	0.993874
chr12	42264031	42270098	L1PA7	L1PA7	0.833585
chr12	12718330	12719858	SVA_D	SVA_D	0.27521
chr8	65229277	65235221	L1PA4	L1PA4	0.426249
chr5	119511741	119517868	L1PA3	L1PA3	0.452298
chr3	168497746	168499193	LTR12C	LTR12C	0.822569
chr4	15175628	15181639	L1PA3	L1PA3	0.207917
chr7	10540597	10546722	L1PA5	L1PA5	0.568133
chr14	66493163	66499333	L1PA4	L1PA4	0.382208
chr10	18916347	18922351	L1PA3	L1PA3	0.329099
chr6	125046842	125052868	L1PA2	L1PA2	0.173135
chrX	121749728	121755313	L1PA7	L1PA7	0.81969
chr8	73059682	73065699	L1PA2	L1PA2	0.106473
chr14	58252141	58258841	L1PA7	L1PA7	0.949545
chr12	41014300	41015580	LTR12E	LTR12E	0.872881
chr10	5094171	5095855	LTR12C	LTR12C	0.871843
chr1	92853959	92860042	L1PA7	L1PA7	0.747451
chr8	105644106	105645667	LTR12C	LTR12C	0.800137
chr1	171519607	171525696	L1PA6	L1PA6	0.641676
chr6	74699524	74700910	LTR12C	LTR12C	0.930793
chrX	74092828	74098850	L1PA3	L1PA3	0.370652
chr1	196491706	196492522	LTR12	LTR12	1.0014
chr8	122430110	122436275	L1PA3	L1PA3	0.206595
chr1	85368365	85369130	LTR12	LTR12	0.965414
chr8	68542786	68544298	LTR12C	LTR12C	0.984419
chr11	63202775	63208798	L1PA2	L1PA2	0.205639
chr11	68741339	68742274	LTR12D	LTR12D	0.749701
chrX	48081187	48082652	SVA_D	SVA_D	0.306227
chr5	134333614	134339786	L1PA5	L1PA5	0.483531
chr8	103496875	103498303	LTR12C	LTR12C	0.69503
chr3	23390734	23396876	L1PA3	L1PA3	0.309169
chr7	19024695	19030692	L1PA3	L1PA3	0.312023
chr12	28565423	28565850	LTR12F	LTR12F	1.00306
chr11	133749015	133755601	L1PA3	L1PA3	0.530065
chrY	23167802	23173823	L1PA2	L1PA2	0.293531
chr3	77888598	77894988	L1PA7	L1PA7	0.899046
chr2	138339913	138346004	L1PA5	L1PA5	0.681522
chr5	156366958	156368344	SVA_B	SVA_B	0.525661
chrX	54241615	54242725	SVA_B	SVA_B	0.484158
chr4	79468464	79470206	SVA_D	SVA_D	0.356273
chrX	127866715	127872868	L1PA3	L1PA3	0.268627
chr4	183307530	183309057	LTR12C	LTR12C	0.83672
chr8	78612791	78614034	LTR12D	LTR12D	0.937008
chr11	83223566	83229707	L1PA4	L1PA4	0.53468
chr12	25757284	25763410	L1PA4	L1PA4	0.533024
chr3	103275381	103281413	L1HS	L1HS	0.0166891
chrX	44769748	44771317	SVA_C	SVA_C	0.556841
chr11	21690594	21696615	L1PA3	L1PA3	0.272082
chr5	166393786	166399820	L1HS	L1HS	0.0146613
chr2	146539963	146546052	L1PA6	L1PA6	0.780598
chr15	38156273	38157121	LTR12	LTR12	0.766043
chr3	137173789	137179825	L1PA3	L1PA3	0.0855795
chr10	24464502	24466183	LTR12C	LTR12C	0.85895
chr1	45628026	45634154	L1PA5	L1PA5	0.490378
chr18	65638877	65645322	L1PA15	L1PA15	1.00016
chr3	39913832	39919982	L1PA3	L1PA3	0.24281
chr2	199549184	199555615	L1PA7	L1PA7	0.848839
chr11	62840427	62846583	L1PA3	L1PA3	0.365588
chr12	124431309	124432652	LTR12C	LTR12C	0.654063
chr5	16436110	16437546	LTR12C	LTR12C	0.703593
chr13	84060761	84061342	LTR12_	LTR12_	1.00208
chr10	134493981	134495093	LTR12C	LTR12C	0.296443
chr15	90177549	90183532	L1PA3	L1PA3	0.208907
chr6	88963339	88969492	L1PA6	L1PA6	0.670577
chr11	29620973	29622259	LTR12C	LTR12C	0.658516
chr7	39616869	39618410	LTR12C	LTR12C	0.983345
chr8	101362956	101364409	SVA_B	SVA_B	0.670362
chr7	117236020	117237441	LTR12C	LTR12C	0.845572
chr3	154951845	154958485	L1PA15	L1PA15	1.00015
chr17	58958801	58964835	L1PA2	L1PA2	0.0712841
chrY	15748654	15749492	LTR12	LTR12	0.993225
chr2	40052132	40058577	L1PA7	L1PA7	0.920883
chr11	23505263	23511731	L1PA7	L1PA7	0.918185
chr3	169397275	169403305	L1PA2	L1PA2	0.0961214
chr4	92297912	92304006	L1PA5	L1PA5	0.613447
chr4	161470535	161471836	LTR12C	LTR12C	0.79184
chr11	33452423	33453854	LTR12C	LTR12C	0.606311
chr20	53836843	53843008	L1PA3	L1PA3	0.252267
chr6	105247635	105253747	L1PA6	L1PA6	0.750166
chr5	4837473	4838927	LTR12C	LTR12C	0.782127
chr12	55983721	55989747	L1PA3	L1PA3	0.393689
chr1	60113419	60119451	L1PA2	L1PA2	0.164531
chr6	75082774	75088798	L1PA4	L1PA4	0.594531
chr9	103015697	103021832	L1PA5	L1PA5	0.558575
chr12	16096639	16102771	L1PA5	L1PA5	0.555371
chr7	17254841	17260979	L1PA4	L1PA4	0.48791
chr1	191120375	191121523	LTR12C	LTR12C	0.953244
chr6	57948700	57954821	L1PA4	L1PA4	0.494104
chr10	83262426	83263805	LTR12C	LTR12C	1.00078
chr5	111046892	111052938	L1PA7	L1PA7	0.814665
chr17	12287438	12288000	LTR12_	LTR12_	0.809524
chr1	177370053	177376077	L1PA3	L1PA3	0.241222
chr10	83028552	83029136	LTR12F	LTR12F	0.997934
chr17	27859373	27860875	SVA_D	SVA_D	0.407989
chr3	194615797	194622636	L1PB2	L1PB2	0.984122
chr16	72661173	72667197	L1PA2	L1PA2	0.0941931
chr6	73914834	73916117	SVA_C	SVA_C	0.463229
chr4	129134944	129140987	L1PA2	L1PA2	0.0619216
chr5	67113772	67119787	L1PA3	L1PA3	0.176839
chr2	180076750	180082867	L1PA6	L1PA6	0.734752
chr5	21107521	21113552	L1PA2	L1PA2	0.0429944
chr2	242777891	242778486	LTR12F	LTR12F	0.975758
chr2	123529366	123535810	L1PA8	L1PA8	0.970523
chr1	199850078	199856212	L1PA4	L1PA4	0.416805
chr3	5154918	5156388	SVA_D	SVA_D	0.448175
chr10	86245499	86251632	L1PA5	L1PA5	0.496271
chr13	57336978	57343485	L1PA7	L1PA7	0.921648
chr10	24139942	24146083	L1PA3	L1PA3	0.345473
chr18	53554643	53560670	L1PA3	L1PA3	0.206175
chrX	130257192	130263217	L1PA3	L1PA3	0.174008
chr2	171479083	171485181	L1PA5	L1PA5	0.590363
chr7	108577589	108583742	L1PA4	L1PA4	0.438295
chr3	851059	857098	L1PA3	L1PA3	0.15676
chr5	9633432	9639758	L1PB2	L1PB2	0.990684
chr4	112299059	112305225	L1PA4	L1PA4	0.396967
chrY	16426188	16427723	LTR12C	LTR12C	0.918467
chr19	53314168	53316035	SVA_E	SVA_E	0.208263
chr5	55544626	55545308	LTR12_	LTR12_	1.00172
chr8	101002864	101008501	L1PA6	L1PA6	0.657215
chr1	167740243	167741395	SVA_A	SVA_A	0.776616
chrX	66246019	66252159	L1PA4	L1PA4	0.671358
chr3	35267309	35273430	L1PA4	L1PA4	0.502906
chr5	16276283	16278012	SVA_F	SVA_F	0.31062
chr7	37159768	37165905	L1PA5	L1PA5	0.49942
chr5	106330024	106335986	L1PA7	L1PA7	0.923234
chr9	1778472	1783616	L1PA4	L1PA4	0.455789
chr5	42979911	42981491	SVA_D	SVA_D	0.329054
chr5	162592062	162598206	L1PA6	L1PA6	0.80824
chr9	102939318	102945568	L1PA7	L1PA7	0.872358
chr5	77414039	77420179	L1PA4	L1PA4	0.344536
chr6	126711471	126718811	L1MA2	L1MA2	1.00014
chr7	90435805	90441945	L1PA4	L1PA4	0.461921
chr9	68989010	68995149	L1PA3	L1PA3	0.522437
chr5	94290673	94297130	L1PA7	L1PA7	0.83121
chr2	192312749	192313391	LTR12_	LTR12_	0.881919
chr3	192897176	192902814	L1PA6	L1PA6	0.730228
chr1	89592701	89594292	LTR12C	LTR12C	0.880617
chr7	116011305	116017446	L1PA4	L1PA4	0.387188
chr2	170164733	170170245	L1PA5	L1PA5	0.535661
chr8	48069913	48075892	L1PA3	L1PA3	0.309917
chr11	13672800	13678953	L1PA6	L1PA6	0.81662
chr3	182818502	182819893	LTR12C	LTR12C	0.253292
chr10	91204392	91210526	L1PA6	L1PA6	0.742791
chr5	111838992	111845319	L1PA8	L1PA8	0.929179
chr3	111952330	111958440	L1PA5	L1PA5	0.536439
chr7	37651643	37657675	L1PA3	L1PA3	0.142279
chr4	88268275	88274298	L1HS	L1HS	0.0292082
chrX	139071163	139077322	L1PA3	L1PA3	0.271332
chrX	124797176	124803688	L1PA15	L1PA15	1.00016
chr21	34629527	34630045	LTR12F	LTR12F	1.00239
chr3	162123654	162129681	L1PA2	L1PA2	0.157753
chr13	66827894	66833920	L1PA3	L1PA3	0.28704
chr13	55402530	55404200	LTR12C	LTR12C	0.814013
chrX	125363439	125369410	L1PA3	L1PA3	0.238801
chr2	234632172	234633880	SVA_F	SVA_F	0.173507
chr6	13512600	13513860	LTR12D	LTR12D	1.00086
chr8	39733525	39734147	LTR12	LTR12	0.94636
chr19	41153272	41155109	SVA_D	SVA_D	0.0385723
chrX	17262397	17263920	SVA_C	SVA_C	0.512298
chrY	24931565	24932712	LTR12D	LTR12D	0.0811843
chr4	129944702	129950846	L1PA4	L1PA4	0.347121
chr10	3360984	3362575	LTR12C	LTR12C	0.845741
chr3	177377154	177383107	L1PA4	L1PA4	0.3347
chr6	88010762	88016909	L1PA3	L1PA3	0.508517
chr21	10021921	10028052	L1PA4	L1PA4	0.145415
chr10	37573084	37574650	LTR12C	LTR12C	0.980218
chrX	14784790	14791271	L1PA11	L1PA11	0.984799
chr1	242644375	242650524	L1PA4	L1PA4	0.37312
chr1	246525726	246527240	SVA_D	SVA_D	0.137199
chr3	174322964	174329115	L1PA3	L1PA3	0.332011
chr7	77898109	77904716	L1PA7	L1PA7	0.830951
chrX	108501063	108508635	L1MA2	L1MA2	1.00013
chr3	19138860	19144839	L1PA2	L1PA2	0.186256
chrX	127311545	127317869	L1PA11	L1PA11	0.998393
chr5	41205359	41211498	L1PA5	L1PA5	0.607551
chr10	123962173	123963720	SVA_D	SVA_D	0.239115
chr15	53976396	53982426	L1PA3	L1PA3	0.190725
chr2	148584269	148585720	LTR12C	LTR12C	0.957809
chr12	59661405	59667856	L1PA8	L1PA8	0.948984
chrX	94117374	94123399	L1PA3	L1PA3	0.247595
chr11	134057927	134058736	LTR12	LTR12	0.96615
chr9	125613736	125615676	SVA_D	SVA_D	0.258152
chr13	38804764	38811007	L1PA11	L1PA11	0.995279
chrY	6681897	6688024	L1PA6	L1PA6	0.915049
chr1	146814747	146820865	L1PA5	L1PA5	0.660352
chr5	67053393	67059522	L1PA4	L1PA4	0.488307
chr8	38577201	38578576	LTR12C	LTR12C	0.858824
chr13	80413803	80419952	L1PA3	L1PA3	0.12035
chr6	75613477	75619628	L1PA4	L1PA4	0.461411
chr5	18398903	18400349	LTR12C	LTR12C	0.791976
chr7	103144912	103151084	L1PA7	L1PA7	0.810277
chr1	176225221	176231246	L1PA2	L1PA2	0.0288608
chr1	169369935	169376035	L1PA5	L1PA5	0.658333
chr2	231390158	231396267	L1PA6	L1PA6	0.782992
chr15	102420480	102426896	L1PA7	L1PA7	0.490025
chr8	53982816	53984251	LTR12C	LTR12C	0.97603
chr11	39462791	39464177	LTR12C	LTR12C	0.817263
chr9	27342423	27343489	SVA_B	SVA_B	0.473085
chr11	51164742	51170764	L1PA2	L1PA2	0.0845998
chr4	136694472	136695072	LTR12	LTR12	1.002
chr3	72759492	72765638	L1PA5	L1PA5	0.475356
chr12	63213582	63219675	L1PA6	L1PA6	0.724178
chr6_qbl_hap6	2458902	2460442	LTR12C	LTR12C	0.206944
chr3	139284206	139290327	L1PA4	L1PA4	0.277529
chr3	107744529	107745786	SVA_D	SVA_D	0.399309
chr13	60013861	60015703	LTR12C	LTR12C	0.806544
chr15	83551645	83557671	L1HS	L1HS	0.00269997
chr11	48674330	48680070	L1PA5	L1PA5	0.843262
chrX	16515479	16521634	L1PA3	L1PA3	0.221305
chrX	148162328	148167969	L1PB1	L1PB1	0.998556
chr12	84783783	84784300	LTR12B	LTR12B	0.985612
chr8	80443760	80450138	L1PA7	L1PA7	0.896145
chr13	100729583	100731015	LTR12C	LTR12C	0.616366
chr5	110269685	110275818	L1PA4	L1PA4	0.545831
chr12	21547943	21553973	L1PA2	L1PA2	0.172344
chr2	107200700	107202182	LTR12C	LTR12C	0.941389
chr10	100858773	100864831	L1PA5	L1PA5	0.605908
chr4	114693318	114694647	LTR12C	LTR12C	1.00081
chrX	138402788	138404203	LTR12C	LTR12C	0.703422
chr2	161513549	161518921	L1ME1	L1ME1	1.00019
chr5	44530892	44531540	LTR12_	LTR12_	0.979927
chr12	52802821	52804486	SVA_D	SVA_D	0.231949
chrX	88671953	88672935	LTR12D	LTR12D	0.602041
chr6	77668682	77674742	L1PA3	L1PA3	0.266275
chr5	43808281	43814423	L1PA5	L1PA5	0.717809
chr14	53784758	53790933	L1PA4	L1PA4	0.506996
chrX	57321919	57328040	L1PA4	L1PA4	0.367381
chr4	142253368	142254913	LTR12C	LTR12C	0.644291
chr8	3146348	3152492	L1PA4	L1PA4	0.577763
chr11	120892187	120893512	LTR12C	LTR12C	0.769796
chr18	47870329	47876357	L1HS	L1HS	0.0581984
chr14	22228357	22234523	L1PA6	L1PA6	0.799538
chr9	18839034	18845182	L1PA3	L1PA3	0.280258
chr14	25636292	25642410	L1PA5	L1PA5	0.560651
chr2	161707230	161713259	L1PA2	L1PA2	0.114353
chr18	41133579	41140429	L1PA15	L1PA15	1.00015
chr17	44329739	44331154	SVA_D	SVA_D	0.332319
chr5	174285876	174292295	L1PA8A	L1PA8A	0.979269
chr4	167762979	167764495	LTR12C	LTR12C	0.978107
chr7	112191104	112192655	SVA_D	SVA_D	0.245348
chr17	45133789	45135214	LTR12C	LTR12C	0.713208
chr4	75901003	75906804	L1PA10	L1PA10	0.990879
chr7	33561359	33567385	L1PA2	L1PA2	0.126898
chr1	110285402	110291563	L1PA4	L1PA4	0.265303
chr5	175478760	175484884	L1PA5	L1PA5	0.152888
chr5	122586626	122592756	L1PA5	L1PA5	0.532007
chr14	41418121	41424139	L1PA3	L1PA3	0.167117
chr4	95090809	95092162	LTR12C	LTR12C	0.92498
chrX	101286418	101292554	L1PA4	L1PA4	0.438701
chr3	110225640	110232036	L1PB1	L1PB1	0.982687
chr12	92707774	92713799	L1PA2	L1PA2	0.0492827
chr11	115894006	115900481	L1PB1	L1PB1	0.968
chr1	205369825	205375987	L1PA3	L1PA3	0.208677
chr4	44746006	44752149	L1PA5	L1PA5	0.66093
chr6	44551909	44558050	L1PA5	L1PA5	0.485019
chr3	72836851	72838245	SVA_B	SVA_B	0.520093
chr8	120171637	120177649	L1PA2	L1PA2	0.111637
chr4	187302281	187308380	L1PB1	L1PB1	0.813136
chr13	76764083	76765494	LTR12C	LTR12C	0.964912
chr9	576863	577571	LTR12	LTR12	0.980263
chr1	45341422	45342884	SVA_D	SVA_D	0.32746
chr2	10001091	10007222	L1PA4	L1PA4	0.37871
chrX	64598476	64604405	L1PA3	L1PA3	0.461314
chrX	53809860	53816021	L1PA4	L1PA4	0.272067
chr1	106421465	106427360	L1PA7	L1PA7	0.92528
chr18	50162208	50168384	L1PB1	L1PB1	0.9526
chr13	25122561	25128156	L1PA4	L1PA4	0.420746
chr5	46371474	46377492	L1PA3	L1PA3	0.751774
chr5	95438904	95444953	L1PA3	L1PA3	0.228106
chr7	27007790	27014025	L1PA13	L1PA13	0.983211
chr9	70890242	70896279	L1PA3	L1PA3	0.0498568
chr20	7783435	7784728	LTR12C	LTR12C	0.912825
chr4	185835888	185836641	LTR12	LTR12	0.928025
chr8	92881746	92887762	L1PA2	L1PA2	0.226842
chr10	33337968	33339616	LTR12C	LTR12C	0.591085
chrX	42448935	42455061	L1PA3	L1PA3	0.272652
chr12	32035639	32036321	LTR12	LTR12	0.9811
chr12	33673704	33679799	L1PA6	L1PA6	0.758632
chr10	5102034	5103398	LTR12C	LTR12C	0.870253
chr2	135568554	135569219	LTR12_	LTR12_	0.854867
chr1	161585745	161587207	SVA_C	SVA_C	0.599119
chr12	16210132	16211556	LTR12C	LTR12C	0.854985
chr15	54991017	54997171	L1PA4	L1PA4	0.48662
chr7	53071454	53073061	LTR12C	LTR12C	0.91639
chr1	214448596	214449389	LTR12	LTR12	0.955267
chr4	76360221	76366390	L1PB1	L1PB1	0.987807
chr5	60156216	60162264	L1PA3	L1PA3	0.327001
chr4	141334496	141340517	L1PA2	L1PA2	0.131735
chr7	10273563	10276782	L1ME1	L1ME1	1.00032
chr11	63186203	63192391	L1PA4	L1PA4	0.384527
chrY	5731392	5736621	L1PREC2	L1PREC2	0.310392
chr13	91465160	91471591	L1PA7	L1PA7	0.934923
chr5	80887668	80893841	L1PA4	L1PA4	0.344311
chr8	24959956	24961402	SVA_B	SVA_B	0.515602
chrX	120665052	120671215	L1PA3	L1PA3	0.321293
chr10	82075011	82076383	LTR12C	LTR12C	0.873428
chr5	124311012	124312347	LTR12C	LTR12C	0.915789
chrX	65591117	65596560	L1PA7	L1PA7	0.938424
chrX	65322135	65328284	L1PA6	L1PA6	0.71268
chr12	11260966	11267260	L1PA7	L1PA7	0.939942
chr6	104894030	104895510	LTR12C	LTR12C	0.906522
chr5	55517193	55523327	L1PA5	L1PA5	0.524528
chr9	89656797	89662815	L1PA3	L1PA3	0.158668
chrY	7058059	7064159	L1PA5	L1PA5	0.793667
chr2	179952114	179958287	L1PA4	L1PA4	0.432241
chr2	205855795	205861829	L1PA2	L1PA2	0.0689248
chr11	98055198	98056502	LTR12C	LTR12C	0.990864
chr8	2282679	2288778	L1PA7	L1PA7	0.43924
chr4	169363140	169369189	L1PA2	L1PA2	0.176332
chr7	10309844	10315984	L1PA4	L1PA4	0.480795
chr6	17580778	17582202	LTR12C	LTR12C	0.928248
chr11	28238110	28244248	L1PA5	L1PA5	0.672242
chr3	186867571	186874077	L1PB1	L1PB1	0.922104
chr1	159538743	159544894	L1PA3	L1PA3	0.342423
chr10	18319580	18325604	L1PA2	L1PA2	0.136732
chr17	66404264	66410283	L1PA3	L1PA3	0.0773779
chr10	46006863	46008669	SVA_D	SVA_D	0.219226
chr5	58248919	58255374	L1PA7	L1PA7	0.911566
chr8	136271344	136277373	L1PA2	L1PA2	0.131725
chr3	7610110	7611659	LTR12C	LTR12C	0.936508
chr4	55673240	55679383	L1PA6	L1PA6	0.708754
chr20	25694292	25700449	L1PA3	L1PA3	0.393759
chr11	108131353	108137370	L1PA2	L1PA2	0.210411
chr1	215567324	215568306	LTR12D	LTR12D	0.993197
chr10	120542229	120543736	LTR12C	LTR12C	0.802416
chrY	28114651	28120535	L1PA6	L1PA6	0.030083
chr4	128884535	128885956	LTR12C	LTR12C	0.715367
chr4	127941723	127947710	L1PA2	L1PA2	0.0992016
chr22	34036490	34042595	L1PA8	L1PA8	0.852623
chr3	118960776	118962389	SVA_B	SVA_B	0.710509
chr1	97116814	97122966	L1PA4	L1PA4	0.71464
chr6	47603383	47608902	L1PA5	L1PA5	0.565603
chr3	69524356	69530514	L1PA3	L1PA3	0.322384
chr9	66478267	66484289	L1PA6	L1PA6	0.59203
chr11	22544724	22550758	L1PA3	L1PA3	0.185372
chr6	71475450	71481600	L1PA3	L1PA3	0.359008
chr9	42188657	42189114	LTR12F	LTR12F	0.291317
chr1	224539358	224540761	LTR12C	LTR12C	0.862625
chr18	19286301	19287708	LTR12C	LTR12C	0.885998
chrX	37257293	37262892	L1PA3	L1PA3	0.161666
chr13	64650911	64652192	LTR12C	LTR12C	0.874682
chr1	158855893	158861904	L1PA2	L1PA2	0.256809
chrX	99411848	99418022	L1PA7	L1PA7	0.901877
chr19	30526301	30527916	L1MC1	L1MC1	1.00066
chrX	66008888	66015010	L1PA5	L1PA5	0.686649
chr3	170045056	170046671	LTR12C	LTR12C	0.984158
chr1	146989265	146989967	LTR12_	LTR12_	1.00166
chrX	132617233	132618724	SVA_B	SVA_B	0.658519
chr14	34814242	34815549	LTR12C	LTR12C	0.811102
chrX	53530356	53532064	SVA_C	SVA_C	0.422886
chr11	87469300	87475436	L1PA5	L1PA5	0.683068
chr18	44874596	44880614	L1PA2	L1PA2	0.180973
chr12	29538294	29539738	LTR12C	LTR12C	0.768601
chr2	36915221	36916609	LTR12C	LTR12C	0.680901
chr14	95123762	95125237	SVA_D	SVA_D	0.225455
chr6	28606437	28608082	LTR12C	LTR12C	0.018123
chr15	82022621	82028649	L1PA2	L1PA2	0.127362
chr2	139011402	139012199	LTR12	LTR12	0.97561
chr6	16464336	16464856	LTR12F	LTR12F	0.95
chr15	78899926	78906072	L1PA4	L1PA4	0.331293
chrX	113365154	113371472	L1PA7	L1PA7	0.792538
chr9	72978498	72979052	LTR12F	LTR12F	1.0022
chr6_cox_hap2	435438	436869	LTR12C	LTR12C	0.00150263
chrX	107785339	107791485	L1PA5	L1PA5	0.429375
chr10	122793590	122795421	LTR12C	LTR12C	0.559214
chr19	46150778	46152484	SVA_D	SVA_D	0.156912
chr16	31594350	31600725	L1PA10	L1PA10	0.949323
chr17	52734927	52741298	L1PA8A	L1PA8A	0.981981
chr5	42734816	42740849	L1PA2	L1PA2	0.0815776
chr2	167844964	167851000	L1HS	L1HS	0.0136456
chr9	85886978	85888541	SVA_C	SVA_C	0.597403
chr6	53169266	53171062	SVA_D	SVA_D	0.481722
chr5	101272557	101279248	L1PA16	L1PA16	1.00015
chr6_apd_hap1	544677	550825	L1PA4	L1PA4	0.00380291
chr4	114717042	114718399	SVA_B	SVA_B	0.645982
chr5	77686475	77687882	SVA_D	SVA_D	0.346595
chr4	123414070	123420223	L1PA3	L1PA3	0.263506
chrX	36905191	36912411	L1MA2	L1MA2	0.999719
chr1	94256208	94262237	L1PA2	L1PA2	0.0295159
chr6	56688783	56690317	SVA_D	SVA_D	0.292887
chr6	44838371	44844402	L1PA2	L1PA2	0.0944192
chr9	105425283	105432248	L1MA1	L1MA1	1.00015
chr1	103124543	103126133	LTR12C	LTR12C	0.779866
chr17_gl000205_random	123985	130012	L1PA2	L1PA2	0.211405
chr8	14424148	14425539	LTR12C	LTR12C	0.865995
chr8	43115750	43121731	L1PA3	L1PA3	0.267812
chr9	121266824	121272955	L1PA5	L1PA5	0.671862
chr8	116765387	116771403	L1PA3	L1PA3	0.186444
chrX	117932735	117934623	LTR12C	LTR12C	0.618568
chr13	40004699	40005455	LTR12	LTR12	0.910061
chr2	119853344	119859423	L1PA5	L1PA5	0.632547
chr6	36416481	36417443	LTR12	LTR12	0.896752
chr6	74716883	74722722	L1PA4	L1PA4	0.481269
chr1	171359618	171360253	LTR12_	LTR12_	1
chr1	13720736	13722139	SVA_D	SVA_D	0.163469
chr8	78885990	78892095	L1PA6	L1PA6	0.855287
chr22	35079693	35081258	SVA_D	SVA_D	0.482594
chr1	103076075	103076785	LTR12_	LTR12_	0.901639
chr17	68699788	68700440	LTR12_	LTR12_	0.998188
chr1	212187883	212189065	SVA_B	SVA_B	0.597967
chr5	37483203	37484697	SVA_C	SVA_C	0.444763
chr15	71318924	71324779	L1PA7	L1PA7	0.915899
chr8	4494323	4494777	LTR12F	LTR12F	1.00282
chr9	47028785	47029197	LTR12F	LTR12F	0.320513
chr16	5235500	5236888	LTR12C	LTR12C	0.92236
chrX	151404469	151410500	L1PA2	L1PA2	0.175856
chr12	38075410	38081562	L1PA3	L1PA3	0.743886
chr12	96577792	96578319	LTR12F	LTR12F	0.990632
chr5	125066069	125072145	L1PA10	L1PA10	0.976908
chr6	70149431	70155460	L1PA2	L1PA2	0.344072
chr14	80420305	80426032	L1PA11	L1PA11	0.998934
chr4	53682623	53688653	L1HS	L1HS	0.0500843
chr3	147706292	147707733	LTR12C	LTR12C	0.89038
chr2	179847178	179853209	L1PA3	L1PA3	0.259821
chr12	30714383	30715931	LTR12C	LTR12C	0.43232
chr14	82294798	82296348	LTR12C	LTR12C	0.881379
chr6	73977770	73979159	LTR12C	LTR12C	0.787432
chr14	24960641	24966775	L1PA5	L1PA5	0.661584
chr8	126595130	126601133	L1HS	L1HS	0.0166017
chr16	16197676	16199048	LTR12C	LTR12C	0.92217
chr20	29850848	29856390	L1PA5	L1PA5	0.569092
chr22	22542243	22548371	L1PA5	L1PA5	0.435965
chr7	31556421	31557480	LTR12D	LTR12D	1.00104
chr2	38183799	38190308	L1PA7	L1PA7	0.905601
chr2	71638604	71644631	L1HS	L1HS	0.0477476
chr2	26592737	26594781	SVA_D	SVA_D	0.294753
chr4	138973197	138974618	LTR12C	LTR12C	0.860712
chr10	119592398	119598398	L1PA2	L1PA2	0.069661
chr1	192955857	192957184	LTR12C	LTR12C	0.722086
chr13	78048611	78050155	LTR12C	LTR12C	0.866343
chr3	117890071	117891732	LTR12C	LTR12C	0.92697
chr19	29247788	29253876	L1PA2	L1PA2	0.633267
chr9	98480389	98480864	LTR12F	LTR12F	1.00267
chr6	118742194	118747967	L1P2	L1P2	0.867619
chr2	151026907	151028102	LTR12C	LTR12C	0.858447
chr9	4195125	4196801	LTR12C	LTR12C	0.987944
chrX	108147123	108152660	L1P1	L1P1	0.566857
chrX	111569373	111575388	L1PA3	L1PA3	0.245647
chrX	109900131	109906277	L1PA6	L1PA6	0.780185
chr8	24697086	24703232	L1PA3	L1PA3	0.312769
chr7	32347356	32353529	L1PA4	L1PA4	0.311708
chr1	101410239	101415671	L1PA6	L1PA6	0.752626
chr9	6177205	6183226	L1PA3	L1PA3	0.218375
chr11	39213427	39214670	LTR12C	LTR12C	0.891514
chr3	32944103	32945867	LTR12C	LTR12C	0.596154
chr9	102993641	103000000	L1PA7	L1PA7	0.898706
chr3	74948260	74949650	LTR12C	LTR12C	0.8
chr8	1454501	1455832	LTR12C	LTR12C	0.932575
chr6	27347954	27349401	LTR12C	LTR12C	0.854491
chr9	100336318	100337737	LTR12C	LTR12C	0.881729
chr19	40109133	40115271	L1PA7	L1PA7	0.930937
chr4	117173069	117179185	L1PA4	L1PA4	0.559342
chr11	84882165	84888736	L1PA11	L1PA11	0.997064
chr3	87066264	87072382	L1PA4	L1PA4	0.654204
chrY	27746428	27752635	L1PA4	L1PA4	0.0248895
chr18	14382193	14383525	SVA_D	SVA_D	0.275974
chr14	40102745	40108880	L1PA4	L1PA4	0.551781
chr4	31185746	31187156	LTR12C	LTR12C	0.840458
chr1	83816096	83822148	L1PA2	L1PA2	0.180108
chrX	14122064	14128094	L1PA3	L1PA3	0.0920742
chr7	156665755	156667262	LTR12C	LTR12C	0.41791
chr5	152680003	152686133	L1PA3	L1PA3	0.472305
chr4	85964498	85970841	L1PA7	L1PA7	0.880186
chr14	58417719	58424162	L1PA7	L1PA7	0.865521
chr4	155965272	155966676	LTR12C	LTR12C	0.805215
chr1	244845160	244845706	LTR12_	LTR12_	0.926009
chr4	128820910	128826778	L1PA7	L1PA7	0.742025
chrX	146223574	146229679	L1PA3	L1PA3	0.254122
chr11	67730555	67731955	LTR12C	LTR12C	0.780769
chr4	13741431	13747452	L1PA8	L1PA8	0.935146
chr8	117402967	117409102	L1PA6	L1PA6	0.675394
chr21	18669250	18669676	LTR12F	LTR12F	1.00307
chr3	114250536	114256992	L1PA7	L1PA7	0.839679
chr22	29947774	29949242	SVA_C	SVA_C	0.538012
chr9	16882113	16882837	LTR12_	LTR12_	1.0016
chr2	135408124	135414144	L1PA2	L1PA2	0.0564189
chr2	107755732	107761848	L1PA5	L1PA5	0.636303
chr4	66786759	66787278	LTR12F	LTR12F	1.00239
chr8	115398203	115399449	LTR12E	LTR12E	0.890925
[truncated: 11,281 more rows]

## Sheet: Sheet5
Figure 1-figure supplement 1-source data 2: Raw. B Fraction of analyzable copy
	FL number	Analyzed	Fraction
SVA_A	91	81	89.011
SVA_B	315	280	88.8889
SVA_C	208	175	84.1346
SVA_D	814	662	81.3268
SVA_E	40	16	40
SVA_F	104	74	71.1538
L1PA8	185	58	31.3514
L1PA7	871	327	37.5431
L1PA6	850	378	44.4706
L1PA5	1002	597	59.5808
L1PA4	1329	749	56.3582
L1PA3	1517	745	49.1101
L1PA2	1054	390	37.0019
L1HS	319	36	11.2853
