# Supplementary material for: Potential role of KRAB-ZFP binding and transcriptional states on DNA methylation of retroelements in human male germ cells
Source: eLife. 2022 Mar 22;11:e76822. doi: 10.7554/eLife.76822 (PMC8967385; doi:10.7554/eLife.76822)
Supplement: Figure 2—source data 1. [file elife-76822-fig2-data1.xlsx]

## Sheet: Sheet1
Figure2-source data 1: Raw. Heatmap showing the fraction of SVA_A copies which overlap KRAB-ZFP peaks.
	Low	Medium	High
ZNF611	100	100	100
ZNF91	100	96.1538	97.8723
ZNF257	0	42.3077	63.8298
ZNF28	0	34.6154	44.6809
ZFP57-rep2	0	0	17.0213
ZFP57	0	0	8.51064
ZKSCAN5	0	3.84615	8.51064
ZNF141	0	0	6.38298
ZNF468	0	0	6.38298
ZNF519	12.5	3.84615	6.38298
ZNF534	0	3.84615	4.25532
ZNF100	0	0	2.12766
ZNF100-rep2	0	0	2.12766
ZNF222	0	0	2.12766
ZNF283	0	0	2.12766
ZNF445	0	0	2.12766
ZNF610	0	0	2.12766
KAP1	0	0	0
HKR1	0	0	0
PRDM9	0	0	0
RBAK	0	0	0
ZFP14	0	0	0
ZFP1	0	0	0
ZFP69B	0	0	0
ZFP69	0	0	0
ZFP90	0	0	0
ZIK1	0	0	0
ZIM2	0	0	0
ZIM3	0	3.84615	0
ZKSCAN2	0	0	0
ZKSCAN3	0	0	0
ZNF100-rep3	0	0	0
ZNF101	0	0	0
ZNF10	0	0	0
ZNF114	0	0	0
ZNF124	0	0	0
ZNF12	0	0	0
ZNF132	0	0	0
ZNF133	0	0	0
ZNF135	0	0	0
ZNF136	0	0	0
ZNF154	0	0	0
ZNF157	0	0	0
ZNF169	0	0	0
ZNF169-rep2	0	0	0
ZNF17	0	0	0
ZNF180	0	0	0
ZNF181	0	0	0
ZNF182	0	3.84615	0
ZNF184	0	0	0
ZNF189	0	0	0
ZNF18	0	0	0
ZNF197	0	0	0
ZNF19	0	0	0
ZNF202	0	0	0
ZNF205	0	0	0
ZNF211	0	0	0
ZNF211-rep2	0	0	0
ZNF212	0	0	0
ZNF214	0	0	0
ZNF223	0	0	0
ZNF224	0	0	0
ZNF225	0	0	0
ZNF235	0	0	0
ZNF248	0	0	0
ZNF254	0	0	0
ZNF25	0	0	0
ZNF263	12.5	0	0
ZNF264	0	0	0
ZNF266	0	0	0
ZNF267	0	0	0
ZNF26	0	0	0
ZNF273	0	0	0
ZNF274	0	0	0
ZNF282	0	0	0
ZNF282-rep2	0	0	0
ZNF284	0	0	0
ZNF285	0	0	0
ZNF287	0	0	0
ZNF2	0	0	0
ZNF300	0	0	0
ZNF302	12.5	0	0
ZNF304	0	0	0
ZNF30	0	0	0
ZNF311	0	0	0
ZNF317	0	0	0
ZNF320	0	0	0
ZNF324B	0	0	0
ZNF324	0	0	0
ZNF331	0	0	0
ZNF333	0	0	0
ZNF334	0	0	0
ZNF337	0	0	0
ZNF33A	0	0	0
ZNF33A-rep2	0	0	0
ZNF33B	0	0	0
ZNF343	0	0	0
ZNF354A	0	0	0
ZNF354B	0	0	0
ZNF382	0	0	0
ZNF382-rep2	0	0	0
ZNF383	0	0	0
ZNF398	0	0	0
ZNF3	0	0	0
ZNF417	0	0	0
ZNF418	0	0	0
ZNF419	0	0	0
ZNF419-rep2	0	0	0
ZNF425	0	0	0
ZNF429	0	0	0
ZNF430	0	0	0
ZNF431	0	0	0
ZNF432	0	0	0
ZNF433	0	0	0
ZNF439	0	0	0
ZNF440	0	0	0
ZNF441	0	0	0
ZNF442	0	0	0
ZNF443	0	0	0
ZNF44	0	0	0
ZNF454	0	0	0
ZNF45	0	0	0
ZNF460	0	0	0
ZNF479	0	0	0
ZNF480	0	0	0
ZNF483	0	0	0
ZNF484	0	0	0
ZNF485	0	0	0
ZNF486	0	0	0
ZNF487P	0	0	0
ZNF492	0	0	0
ZNF496	0	0	0
ZNF506	0	0	0
ZNF525	0	0	0
ZNF527	0	0	0
ZNF528	0	0	0
ZNF529	0	0	0
ZNF530	0	0	0
ZNF540	0	0	0
ZNF543	0	0	0
ZNF547	0	0	0
ZNF548	0	0	0
ZNF549	0	0	0
ZNF549-rep2	0	0	0
ZNF550	0	0	0
ZNF552	0	0	0
ZNF555	0	0	0
ZNF557	0	0	0
ZNF558	0	0	0
ZNF561	0	0	0
ZNF562	0	0	0
ZNF564	0	0	0
ZNF565	0	0	0
ZNF566	0	0	0
ZNF567	0	0	0
ZNF570	0	0	0
ZNF571	0	0	0
ZNF573	0	0	0
ZNF582	0	0	0
ZNF584	0	0	0
ZNF585A	0	0	0
ZNF587	0	0	0
ZNF605	0	0	0
ZNF613	0	0	0
ZNF614	0	0	0
ZNF615	0	0	0
ZNF616	0	0	0
ZNF619	0	0	0
ZNF620	0	0	0
ZNF621	0	0	0
ZNF626	0	0	0
ZNF627	0	0	0
ZNF641	0	0	0
ZNF649	0	0	0
ZNF662	0	0	0
ZNF667	0	0	0
ZNF669	0	0	0
ZNF671	0	0	0
ZNF674	0	0	0
ZNF675	0	0	0
ZNF680	0	0	0
ZNF680-rep2	0	0	0
ZNF681	0	0	0
ZNF682	0	0	0
ZNF682-rep2	0	0	0
ZNF684	0	0	0
ZNF695	0	0	0
ZNF69	0	0	0
ZNF701	0	0	0
ZNF705G	0	0	0
ZNF707	0	0	0
ZNF708	0	0	0
ZNF714	0	0	0
ZNF716	0	0	0
ZNF730	0	0	0
ZNF736	0	0	0
ZNF737	0	0	0
ZNF749	0	0	0
ZNF74	0	0	0
ZNF75D	0	0	0
ZNF75D-rep2	0	0	0
ZNF764	0	0	0
ZNF765	0	0	0
ZNF766	0	0	0
ZNF776	0	0	0
ZNF777	0	0	0
ZNF778	0	0	0
ZNF77	0	0	0
ZNF780A	0	0	0
ZNF782	0	0	0
ZNF783	0	0	0
ZNF785	0	0	0
ZNF786	0	0	0
ZNF789	0	0	0
ZNF790	0	0	0
ZNF791	0	0	0
ZNF792	0	0	0
ZNF793	0	3.84615	0
ZNF793-rep2	0	0	0
ZNF799	0	0	0
ZNF79	0	0	0
ZNF7	0	0	0
ZNF805	0	0	0
ZNF808	0	0	0
ZNF816	0	0	0
ZNF81	0	0	0
ZNF823	0	0	0
ZNF846	0	0	0
ZNF84	0	0	0
ZNF85	0	0	0
ZNF860	0	0	0
ZNF879	0	0	0
ZNF880	0	0	0
ZNF891	0	0	0
ZNF8	0	0	0
ZNF90	0	0	0
ZNF93	0	0	0
ZNF195	0	0	2.12766
ZNF763	0	0	2.12766
ZFP28	0	0	0
ZKSCAN7	0	0	0
ZKSCAN4	0	0	0
ZNF160	0	0	0
ZNF138	0	0	0
ZNF251	0	0	0
ZNF34	0	0	0
ZNF416	0	0	0
ZNF426	0	0	0
ZNF446	0	0	0
ZNF546	0	0	0
ZNF577	0	0	0
ZNF578	0	0	0
ZNF724P	0	0	0
ZNF729	0	0	0
ZNF772	0	0	0
ZNF812	0	0	0
ZNF850	0	0	0
ZNF746	0	0	0
ZNF213	0	0	0
ZNF256	0	0	0
ZKSCAN8	0	0	0
ZNF20	0	0	0
ZNF597	0	0	0
ZNF215	0	0	0

## Sheet: Sheet2
Figure2-source data 2: Raw. Bar graphs showing the fraction of SVA_A copies with ZNF257 and ZNF28 peaks.
	Both	ZN257	ZNF28	Not
Low	0	0	0	8
Medium	6	5	3	12
High	14	16	7	10

## Sheet: Sheet3
Figure2-source data 3: Raw. Violin plots showing copy number of VNTR1 of each SVA sub-type.
type	copy
SVA_A	2.66667
SVA_A	4.88889
SVA_A	6
SVA_A	4.31667
SVA_A	4.83056
SVA_A	17.1111
SVA_A	6.88611
SVA_A	6.88611
SVA_A	2.67222
SVA_A	9.04444
SVA_A	6.93333
SVA_A	8.11111
SVA_A	24.8333
SVA_A	21.0306
SVA_A	7.60556
SVA_A	11.6111
SVA_A	7.98611
SVA_A	16.575
SVA_A	7.41111
SVA_A	4.52222
SVA_A	10.0722
SVA_A	5.96111
SVA_A	8.71111
SVA_A	10.2083
SVA_A	11.1222
SVA_A	25.4889
SVA_A	11.7611
SVA_A	26.2833
SVA_A	26.0056
SVA_A	8.34167
SVA_A	19.825
SVA_A	12.1278
SVA_A	25.875
SVA_A	18.6833
SVA_A	29.7806
SVA_A	26.5167
SVA_A	11.2444
SVA_A	13.9944
SVA_A	12.6417
SVA_A	26.4889
SVA_A	7.91389
SVA_A	24.1667
SVA_A	18.5194
SVA_A	14.5667
SVA_A	18.6083
SVA_A	7.6
SVA_A	32.6833
SVA_A	24.975
SVA_A	15.6222
SVA_A	32.2722
SVA_A	8.42778
SVA_A	19.6778
SVA_A	15.3806
SVA_A	39.4667
SVA_A	7.60556
SVA_A	19.8361
SVA_A	20.1444
SVA_A	19.2194
SVA_A	20.8639
SVA_A	14.7583
SVA_A	32.5806
SVA_A	24.1722
SVA_A	21.9556
SVA_A	24.8722
SVA_A	20.2667
SVA_A	36.0889
SVA_A	25.0778
SVA_A	24.2556
SVA_A	36.2806
SVA_A	19.9389
SVA_A	24.7694
SVA_A	29.1111
SVA_A	24.7917
SVA_A	23.6444
SVA_A	21.3444
SVA_A	18.6889
SVA_A	23.2278
SVA_A	27.1333
SVA_A	29.7667
SVA_A	12.7444
SVA_A	31.0389
SVA_B	15.925
SVA_B	17.0083
SVA_B	28.4944
SVA_B	17.0083
SVA_B	9.66111
SVA_B	28.175
SVA_B	10.8722
SVA_B	12.8917
SVA_B	10.7778
SVA_B	11.6111
SVA_B	7.44444
SVA_B	16.3333
SVA_B	15.925
SVA_B	9.55556
SVA_B	15.4667
SVA_B	15.3333
SVA_B	19.175
SVA_B	7.08889
SVA_B	11.1111
SVA_B	19.7778
SVA_B	13.8556
SVA_B	12.7778
SVA_B	12.4556
SVA_B	11.4444
SVA_B	10.25
SVA_B	27.4417
SVA_B	10.3333
SVA_B	17.4167
SVA_B	18.4444
SVA_B	13.8889
SVA_B	24.2222
SVA_B	23.1111
SVA_B	10.8889
SVA_B	15.3333
SVA_B	8.44444
SVA_B	17.5556
SVA_B	13
SVA_B	10.1111
SVA_B	15.4167
SVA_B	8.86667
SVA_B	3.575
SVA_B	14.5444
SVA_B	12
SVA_B	18.1111
SVA_B	14.2222
SVA_B	6.825
SVA_B	8.18056
SVA_B	11.1583
SVA_B	14.1111
SVA_B	11.7778
SVA_B	9.81667
SVA_B	14.2222
SVA_B	15.2222
SVA_B	10.8889
SVA_B	7.55556
SVA_B	17.0083
SVA_B	7.69167
SVA_B	17.4444
SVA_B	6.33333
SVA_B	10.725
SVA_B	4.21389
SVA_B	0
SVA_B	0
SVA_B	12.4556
SVA_B	11.8889
SVA_B	9.425
SVA_B	15.6
SVA_B	17.5556
SVA_B	12.675
SVA_B	7.11111
SVA_B	13.1111
SVA_B	12.5667
SVA_B	11.0833
SVA_B	14.2222
SVA_B	10.1111
SVA_B	12.5667
SVA_B	11.8889
SVA_B	8.66667
SVA_B	3.88889
SVA_B	10.8889
SVA_B	8.55556
SVA_B	11.4444
SVA_B	15.2222
SVA_B	8.66667
SVA_B	12.35
SVA_B	13.1111
SVA_B	9.81667
SVA_B	12
SVA_B	7.81111
SVA_B	7.70556
SVA_B	12
SVA_B	6.175
SVA_B	16.4444
SVA_B	9.77778
SVA_B	10.7778
SVA_B	14.7583
SVA_B	10.5083
SVA_B	23
SVA_B	20.8889
SVA_B	8.54167
SVA_B	13
SVA_B	17.0083
SVA_B	12.5667
SVA_B	13.975
SVA_B	11.1111
SVA_B	10.6667
SVA_B	9.77778
SVA_B	15.5556
SVA_B	7.55556
SVA_B	20.7944
SVA_B	12.0333
SVA_B	12
SVA_B	18.5556
SVA_B	13.6889
SVA_B	2.77778
SVA_B	11.55
SVA_B	9.77778
SVA_B	16.3333
SVA_B	15.2222
SVA_B	9.81667
SVA_B	10.7917
SVA_B	13.1111
SVA_B	8.12778
SVA_B	15.5167
SVA_B	6.88889
SVA_B	8.88889
SVA_B	16.2222
SVA_B	12
SVA_B	11.5917
SVA_B	12.2222
SVA_B	17.5556
SVA_B	6.68056
SVA_B	16.4444
SVA_B	10.075
SVA_B	16.4444
SVA_B	13.875
SVA_B	10.3444
SVA_B	11.1111
SVA_B	15.3333
SVA_B	15.2222
SVA_B	10.6167
SVA_B	16.4444
SVA_B	9.66111
SVA_B	15.925
SVA_B	9.77778
SVA_B	5.85833
SVA_B	8.98333
SVA_B	10.7778
SVA_B	12
SVA_B	8.88889
SVA_B	12.8889
SVA_B	10.9417
SVA_B	15.2222
SVA_B	9.5
SVA_B	12.35
SVA_B	17.5694
SVA_B	6.43889
SVA_B	9.425
SVA_B	23.9611
SVA_B	14.1111
SVA_B	14.7583
SVA_B	13.5333
SVA_B	12.7278
SVA_B	17.5556
SVA_B	14.6944
SVA_B	6.88333
SVA_B	12.2444
SVA_B	17.0083
SVA_B	14.9889
SVA_B	11.05
SVA_B	14.7583
SVA_B	17.0083
SVA_B	8.66667
SVA_B	11.55
SVA_B	23.1111
SVA_B	17.5556
SVA_B	8.45
SVA_B	13.1111
SVA_B	12.4361
SVA_B	14.1111
SVA_B	16.4444
SVA_B	10.8889
SVA_B	14.1111
SVA_B	8.66667
SVA_B	14.1111
SVA_B	7.36667
SVA_B	17.8889
SVA_B	14.7583
SVA_B	18.7778
SVA_B	14.2222
SVA_B	13.1111
SVA_B	11.7778
SVA_B	5.24167
SVA_B	5
SVA_B	2.55556
SVA_B	14.7778
SVA_B	12
SVA_B	10.6333
SVA_B	12
SVA_B	11.2667
SVA_B	15.3333
SVA_B	11.7
SVA_B	17.4444
SVA_B	3.59722
SVA_B	24.1111
SVA_B	11.5556
SVA_B	9.77778
SVA_B	15.1667
SVA_B	14.1111
SVA_B	10.7917
SVA_B	9.31667
SVA_B	15.2222
SVA_B	15.8889
SVA_B	11.9778
SVA_B	11.1806
SVA_B	6.44444
SVA_B	20.1056
SVA_B	18.8083
SVA_B	15.6222
SVA_B	14.7583
SVA_B	14.8417
SVA_B	22
SVA_B	11.8222
SVA_B	10.9778
SVA_B	14.1917
SVA_B	13.7583
SVA_B	15.3333
SVA_B	7.08333
SVA_B	16.4444
SVA_B	11.2028
SVA_B	13
SVA_B	9.41111
SVA_B	24.1111
SVA_B	12.3333
SVA_B	10.4
SVA_B	14.7583
SVA_B	18.6667
SVA_B	13.0472
SVA_B	15.3333
SVA_B	13.1111
SVA_B	8.22222
SVA_B	8.37778
SVA_B	6.875
SVA_B	12.6194
SVA_B	7.70556
SVA_B	14.6972
SVA_B	14.5556
SVA_B	6.175
SVA_B	9.28889
SVA_B	15.8278
SVA_B	11.375
SVA_B	11.6667
SVA_B	3.575
SVA_B	14.8417
SVA_B	12.35
SVA_B	15.6222
SVA_B	11.7778
SVA_B	12
SVA_B	18.2
SVA_B	15.925
SVA_B	11.1222
SVA_B	10.6667
SVA_B	17.5556
SVA_B	11.7167
SVA_B	14.1111
SVA_B	14.2222
SVA_B	10.2222
SVA_B	7.6
SVA_B	23.1111
SVA_B	12.35
SVA_B	7.28889
SVA_B	9.66667
SVA_B	18.5556
SVA_B	9.92222
SVA_B	12
SVA_B	15.8278
SVA_B	11.05
SVA_B	16.4444
SVA_B	13.7778
SVA_C	14.8417
SVA_C	10
SVA_C	8.99167
SVA_C	15.925
SVA_C	9.77778
SVA_C	15.5556
SVA_C	9.55556
SVA_C	10.9556
SVA_C	7.73333
SVA_C	8.37778
SVA_C	15.8889
SVA_C	14
SVA_C	9.28889
SVA_C	10.5417
SVA_C	17.5556
SVA_C	11.7778
SVA_C	11.1583
SVA_C	7.90833
SVA_C	10.8889
SVA_C	14.2222
SVA_C	9.44444
SVA_C	17.9667
SVA_C	8.42778
SVA_C	11.2028
SVA_C	11.7778
SVA_C	14.8417
SVA_C	14.4083
SVA_C	9.1
SVA_C	17.0083
SVA_C	13.8556
SVA_C	8.66667
SVA_C	10.5083
SVA_C	13.2583
SVA_C	15.1111
SVA_C	12.8889
SVA_C	10.2222
SVA_C	12.2417
SVA_C	13.1111
SVA_C	8.23333
SVA_C	9.77778
SVA_C	18.5556
SVA_C	17.5556
SVA_C	10.6333
SVA_C	10.3333
SVA_C	12.0694
SVA_C	10.4
SVA_C	5.85
SVA_C	7.91667
SVA_C	14.2222
SVA_C	11.9167
SVA_C	8.63333
SVA_C	14.8889
SVA_C	14.4611
SVA_C	16.4444
SVA_C	12.675
SVA_C	11.7167
SVA_C	12.2444
SVA_C	14.2222
SVA_C	6.16667
SVA_C	15.3333
SVA_C	12.1389
SVA_C	12.8889
SVA_C	13.6889
SVA_C	16.4444
SVA_C	18.6667
SVA_C	12.4056
SVA_C	11.5917
SVA_C	14.8417
SVA_C	7.25833
SVA_C	13.325
SVA_C	15.8889
SVA_C	8.625
SVA_C	12
SVA_C	9.90278
SVA_C	9.66667
SVA_C	9.71111
SVA_C	7.7
SVA_C	14.1111
SVA_C	10.8889
SVA_C	11.8889
SVA_C	14.1111
SVA_C	13.1111
SVA_C	17.5556
SVA_C	13.6167
SVA_C	9.71111
SVA_C	12.2444
SVA_C	15.3333
SVA_C	6.75556
SVA_C	5.13333
SVA_C	9.22222
SVA_C	19.8889
SVA_C	12.2222
SVA_C	8.33333
SVA_C	13.5333
SVA_C	12
SVA_C	15.1111
SVA_C	7.6
SVA_C	11.1111
SVA_C	14.8417
SVA_C	10.6667
SVA_C	8.625
SVA_C	10.9556
SVA_C	9.1
SVA_C	14.4083
SVA_C	12
SVA_C	7.44444
SVA_C	11.4444
SVA_C	9.02222
SVA_C	11.6667
SVA_C	9.66667
SVA_C	15.7778
SVA_C	13.7583
SVA_C	14.4639
SVA_C	17.5556
SVA_C	12
SVA_C	13.1111
SVA_C	10.9556
SVA_C	17.0083
SVA_C	9.425
SVA_C	11.8889
SVA_C	10.5417
SVA_C	10.6333
SVA_C	12.675
SVA_C	17.225
SVA_C	9.66667
SVA_C	9.77778
SVA_C	14.2222
SVA_C	10.6667
SVA_C	14.8417
SVA_C	10.6333
SVA_C	12
SVA_C	18.5556
SVA_C	12
SVA_C	14.8417
SVA_C	12
SVA_C	13.7583
SVA_C	9.77778
SVA_C	15.925
SVA_C	9.77778
SVA_C	17.5556
SVA_C	15.3333
SVA_C	9.75
SVA_C	10.8889
SVA_C	10.0444
SVA_C	14.2222
SVA_C	5.33333
SVA_C	7
SVA_C	9.66667
SVA_C	10.8333
SVA_C	10.8889
SVA_C	12.8889
SVA_C	10.075
SVA_C	8.44444
SVA_C	10.5556
SVA_C	17.5556
SVA_C	12
SVA_C	10.6167
SVA_C	15.925
SVA_C	10.8889
SVA_C	6.55556
SVA_C	18.6667
SVA_C	15.3333
SVA_C	15.3333
SVA_C	16
SVA_C	6.825
SVA_C	10.4
SVA_C	12.35
SVA_C	14.2222
SVA_C	9.77778
SVA_C	13.7583
SVA_C	17.5556
SVA_C	20.8889
SVA_C	11.7167
SVA_C	21.8889
SVA_C	10.075
SVA_D	10.5083
SVA_D	9.85833
SVA_D	9.95556
SVA_D	13.975
SVA_D	9.92222
SVA_D	10.6667
SVA_D	19.6667
SVA_D	16.4444
SVA_D	14.2222
SVA_D	12.5667
SVA_D	11.5917
SVA_D	13.1111
SVA_D	11.6667
SVA_D	14
SVA_D	11.5917
SVA_D	14.2222
SVA_D	10.3333
SVA_D	13.2222
SVA_D	14.7778
SVA_D	10.5083
SVA_D	15.925
SVA_D	12.9167
SVA_D	13.2222
SVA_D	11.5917
SVA_D	13.5556
SVA_D	13
SVA_D	11.6667
SVA_D	13.1111
SVA_D	9.44444
SVA_D	15.1111
SVA_D	6.16667
SVA_D	11.7167
SVA_D	7.53333
SVA_D	13.975
SVA_D	11.3333
SVA_D	13.1111
SVA_D	11.5917
SVA_D	6.44444
SVA_D	9.31667
SVA_D	15.3333
SVA_D	16.4444
SVA_D	9.5
SVA_D	15.8278
SVA_D	14.2222
SVA_D	12.675
SVA_D	9.20833
SVA_D	14.2222
SVA_D	11.9278
SVA_D	14.1111
SVA_D	11.7167
SVA_D	23.1111
SVA_D	11.2028
SVA_D	11.7167
SVA_D	8.66667
SVA_D	13
SVA_D	11.375
SVA_D	13.1111
SVA_D	13.65
SVA_D	15.8167
SVA_D	14.2222
SVA_D	11.1583
SVA_D	22
SVA_D	9.39444
SVA_D	0
SVA_D	10.1333
SVA_D	5.59444
SVA_D	9.77778
SVA_D	15.7889
SVA_D	13.1111
SVA_D	10.5083
SVA_D	13
SVA_D	10.6667
SVA_D	9.92222
SVA_D	14.2222
SVA_D	9.92222
SVA_D	0
SVA_D	9.14722
SVA_D	15.1111
SVA_D	11.1889
SVA_D	13.1111
SVA_D	14.9222
SVA_D	8.55556
SVA_D	12
SVA_D	12.4583
SVA_D	13.4444
SVA_D	13.325
SVA_D	9.04167
SVA_D	14.2222
SVA_D	12.7444
SVA_D	10.6167
SVA_D	9.41111
SVA_D	20.8889
SVA_D	13.3861
SVA_D	12.1333
SVA_D	15.925
SVA_D	14.8417
SVA_D	9.20833
SVA_D	10.4444
SVA_D	9.66667
SVA_D	12.5556
SVA_D	16.2222
SVA_D	6.77778
SVA_D	11.5917
SVA_D	12.5556
SVA_D	12
SVA_D	10.6611
SVA_D	15.5167
SVA_D	16.3333
SVA_D	13.65
SVA_D	12.4583
SVA_D	12.5
SVA_D	13.1111
SVA_D	17.5556
SVA_D	14.2222
SVA_D	14.2222
SVA_D	10.8722
SVA_D	20.8889
SVA_D	11.1806
SVA_D	14.7778
SVA_D	13.7778
SVA_D	11.5917
SVA_D	17.2222
SVA_D	13.1111
SVA_D	12.5667
SVA_D	13.1111
SVA_D	5.625
SVA_D	10.6333
SVA_D	28.6667
SVA_D	10.6667
SVA_D	12.1111
SVA_D	17.4444
SVA_D	16.7917
SVA_D	12.8889
SVA_D	13.65
SVA_D	14.2222
SVA_D	11.4833
SVA_D	7.60556
SVA_D	16.4444
SVA_D	14.2222
SVA_D	13.65
SVA_D	12.4583
SVA_D	15.8889
SVA_D	11.7167
SVA_D	9.88889
SVA_D	10.8722
SVA_D	8.55556
SVA_D	19.1111
SVA_D	5.13889
SVA_D	12.2222
SVA_D	10.8611
SVA_D	9.77778
SVA_D	17.3333
SVA_D	0
SVA_D	16.2389
SVA_D	7.38889
SVA_D	8.55556
SVA_D	12
SVA_D	10.6667
SVA_D	11.05
SVA_D	20.8889
SVA_D	14.2222
SVA_D	14.2222
SVA_D	11.5917
SVA_D	16.4444
SVA_D	13.1111
SVA_D	11.2778
SVA_D	11.9278
SVA_D	9.33333
SVA_D	12.5667
SVA_D	12.5667
SVA_D	11.4833
SVA_D	15.1111
SVA_D	9.02222
SVA_D	7.90833
SVA_D	13.1111
SVA_D	16.6833
SVA_D	7.475
SVA_D	10.8889
SVA_D	13.8889
SVA_D	14.2222
SVA_D	12
SVA_D	14.2222
SVA_D	12.8889
SVA_D	10.4
SVA_D	10.0722
SVA_D	11.7778
SVA_D	10.5556
SVA_D	13
SVA_D	12.8889
SVA_D	6.175
SVA_D	16.4444
SVA_D	14.0833
SVA_D	10.9028
SVA_D	10.4
SVA_D	11.5917
SVA_D	12.8889
SVA_D	14.2222
SVA_D	13.1111
SVA_D	14.1111
SVA_D	12.4861
SVA_D	12.7778
SVA_D	14.2222
SVA_D	6.44444
SVA_D	7.60556
SVA_D	12.8889
SVA_D	12
SVA_D	13.65
SVA_D	20.6667
SVA_D	24.2222
SVA_D	23.1111
SVA_D	11.2778
SVA_D	28.6667
SVA_D	21.1111
SVA_D	10.5556
SVA_D	10.6611
SVA_D	12.5556
SVA_D	2.74444
SVA_D	16.6667
SVA_D	7.9
SVA_D	7.5
SVA_D	9.88889
SVA_D	13
SVA_D	14.1167
SVA_D	11.8889
SVA_D	15.3333
SVA_D	14.1111
SVA_D	14.1111
SVA_D	12.1111
SVA_D	10.7667
SVA_D	12.8889
SVA_D	13.7583
SVA_D	11.3333
SVA_D	12.8889
SVA_D	17.5556
SVA_D	13
SVA_D	12.675
SVA_D	18.8194
SVA_D	14.2222
SVA_D	11.2667
SVA_D	14.8417
SVA_D	14.2222
SVA_D	10.5083
SVA_D	11.7778
SVA_D	17.0083
SVA_D	12.5556
SVA_D	7.11111
SVA_D	10.5083
SVA_D	13.65
SVA_D	14.2222
SVA_D	14
SVA_D	12
SVA_D	10
SVA_D	11.7639
SVA_D	9.5
SVA_D	9.96667
SVA_D	13.1111
SVA_D	17.5556
SVA_D	11.5917
SVA_D	11.5556
SVA_D	13.1111
SVA_D	11.8889
SVA_D	17.4444
SVA_D	10.6667
SVA_D	11.55
SVA_D	7.91389
SVA_D	9.425
SVA_D	4.00833
SVA_D	11.8889
SVA_D	7.25833
SVA_D	8
SVA_D	19.6667
SVA_D	15
SVA_D	12.5667
SVA_D	12.4056
SVA_D	12.675
SVA_D	15.1111
SVA_D	15
SVA_D	12.5667
SVA_D	12.5556
SVA_D	24.2222
SVA_D	17.5556
SVA_D	6
SVA_D	7.04167
SVA_D	9.55556
SVA_D	10
SVA_D	13
SVA_D	10.6667
SVA_D	12.8889
SVA_D	13.1111
SVA_D	8.23333
SVA_D	10.725
SVA_D	7.44444
SVA_D	11.6111
SVA_D	14.2222
SVA_D	11.4444
SVA_D	11.05
SVA_D	12
SVA_D	14.8417
SVA_D	15.3333
SVA_D	14.2222
SVA_D	11.7778
SVA_D	15.8889
SVA_D	10.6667
SVA_D	10.8889
SVA_D	8.34167
SVA_D	16.3333
SVA_D	12.8889
SVA_D	9.77778
SVA_D	9.5
SVA_D	0
SVA_D	8.23333
SVA_D	10.4806
SVA_D	16.2222
SVA_D	13.5556
SVA_D	14.7778
SVA_D	13.7778
SVA_D	10.7778
SVA_D	15.3333
SVA_D	8.66667
SVA_D	14.2222
SVA_D	8.44444
SVA_D	18.6667
SVA_D	12.6667
SVA_D	12.8889
SVA_D	9.64167
SVA_D	13
SVA_D	5.98889
SVA_D	11.8889
SVA_D	15.4917
SVA_D	10.5083
SVA_D	13.1111
SVA_D	12.675
SVA_D	13.1111
SVA_D	20.8139
SVA_D	17.0083
SVA_D	9.55556
SVA_D	18.0917
SVA_D	5.88889
SVA_D	9.22222
SVA_D	10.5083
SVA_D	16.4444
SVA_D	12.4556
SVA_D	11.4
SVA_D	10.8889
SVA_D	16.4444
SVA_D	8.23333
SVA_D	11.5556
SVA_D	11.1806
SVA_D	12.5667
SVA_D	12.5667
SVA_D	9.44444
SVA_D	15.8889
SVA_D	11.5917
SVA_D	22.1111
SVA_D	13.1111
SVA_D	13
SVA_D	17.0083
SVA_D	13
SVA_D	13.8889
SVA_D	10.8889
SVA_D	11.25
SVA_D	12.5556
SVA_D	13.1111
SVA_D	11.8083
SVA_D	11.6111
SVA_D	10.3111
SVA_D	14.2222
SVA_D	15.2222
SVA_D	13.1111
SVA_D	9.77778
SVA_D	16.4444
SVA_D	12.8889
SVA_D	12.2417
SVA_D	16.2222
SVA_D	13
SVA_D	12
SVA_D	12
SVA_D	16.6667
SVA_D	13.1111
SVA_D	12
SVA_D	11.4444
SVA_D	12.1333
SVA_D	14
SVA_D	20.8889
SVA_D	12
SVA_D	9.85833
SVA_D	13.1111
SVA_D	9.5
SVA_D	7.08889
SVA_D	8.925
SVA_D	11.375
SVA_D	16.3333
SVA_D	10.7778
SVA_D	16.4444
SVA_D	14
SVA_D	12.35
SVA_D	17.7667
SVA_D	11.1167
SVA_D	13.1111
SVA_D	0
SVA_D	12.5667
SVA_D	12.4583
SVA_D	14.2222
SVA_D	15.925
SVA_D	9.71111
SVA_D	13
SVA_D	9.22222
SVA_D	11.8889
SVA_D	12.5667
SVA_D	10.7778
SVA_D	14.7583
SVA_D	12.1389
SVA_D	16.4444
SVA_D	11.5917
SVA_D	14.2222
SVA_D	12.8889
SVA_D	11.4
SVA_D	13.1111
SVA_D	12.8889
SVA_D	11
SVA_D	14.1111
SVA_D	12.7778
SVA_D	14.2222
SVA_D	11.1111
SVA_D	13
SVA_D	11.4833
SVA_D	7.90833
SVA_D	14.1111
SVA_D	12.5083
SVA_D	14
SVA_D	13.1111
SVA_D	16.575
SVA_D	14.1111
SVA_D	11.7778
SVA_D	12.2306
SVA_D	14.2222
SVA_D	17.5556
SVA_D	11.4833
SVA_D	8.55556
SVA_D	11.7778
SVA_D	8.66667
SVA_D	11.4111
SVA_D	13.65
SVA_D	12.8889
SVA_D	9.425
SVA_D	10.6611
SVA_D	10.7778
SVA_D	12
SVA_D	8.55556
SVA_D	9.66667
SVA_D	8.63333
SVA_D	9.425
SVA_D	10.1833
SVA_D	14.7778
SVA_D	7.4
SVA_D	12.8889
SVA_D	9.16667
SVA_D	15.3333
SVA_D	10.5556
SVA_D	19.7778
SVA_D	10.6889
SVA_D	12.6667
SVA_D	8.44444
SVA_D	11.8889
SVA_D	12.0333
SVA_D	13.1111
SVA_D	11.4833
SVA_D	12.8889
SVA_D	20.8889
SVA_D	10.5083
SVA_D	12.5667
SVA_D	14.1111
SVA_D	10.5861
SVA_D	15.2222
SVA_D	12.8889
SVA_D	15.3333
SVA_D	12.7778
SVA_D	15.3333
SVA_D	12.5667
SVA_D	13.1111
SVA_D	10
SVA_D	12.5083
SVA_D	13.1111
SVA_D	12
SVA_D	12
SVA_D	17.5556
SVA_D	9.55556
SVA_D	2.925
SVA_D	11.7167
SVA_D	6
SVA_D	13.1111
SVA_D	12.8889
SVA_D	10.45
SVA_D	12.2417
SVA_D	13.1111
SVA_D	13.1111
SVA_D	12
SVA_D	11.6139
SVA_D	13.4333
SVA_D	17.15
SVA_D	13.1111
SVA_D	17.5556
SVA_D	13
SVA_D	9.96667
SVA_D	11.7778
SVA_D	7.19444
SVA_D	12.5556
SVA_D	11.3333
SVA_D	11.9167
SVA_D	5.24167
SVA_D	14
SVA_D	10.6667
SVA_D	11.7778
SVA_D	12.7778
SVA_D	14.1111
SVA_D	5.41667
SVA_D	13.8667
SVA_D	13
SVA_D	5.77778
SVA_D	12.8889
SVA_D	9.55556
SVA_D	12.8889
SVA_D	11.4833
SVA_D	13.8667
SVA_D	11.7167
SVA_D	10.7778
SVA_D	17.4444
SVA_D	13.2222
SVA_D	12.5556
SVA_D	21.3417
SVA_D	10.3444
SVA_D	2.15833
SVA_D	9.81667
SVA_D	12.025
SVA_D	14.1111
SVA_D	13.1111
SVA_D	12
SVA_D	10.7667
SVA_D	12
SVA_D	11.6139
SVA_D	12.7778
SVA_D	12.9472
SVA_D	11.7778
SVA_D	16.3333
SVA_D	16.4444
SVA_D	10.5083
SVA_D	13.8889
SVA_D	10.6333
SVA_D	7.475
SVA_D	13.1111
SVA_D	16.3333
SVA_D	10.7778
SVA_D	13
SVA_D	6.44444
SVA_D	7.11111
SVA_D	10.6667
SVA_D	9.425
SVA_D	10.6667
SVA_D	10.1333
SVA_D	16.4444
SVA_D	13.1111
SVA_D	7.50278
SVA_D	18.0917
SVA_D	18.6667
SVA_D	8.33333
SVA_D	12.5667
SVA_D	14
SVA_D	12
SVA_D	10.5083
SVA_D	12
SVA_D	11.7167
SVA_D	12
SVA_D	11.5917
SVA_D	9.55556
SVA_D	13.4333
SVA_D	11.1806
SVA_D	10
SVA_D	11.7778
SVA_D	14
SVA_D	9.60556
SVA_D	9.47222
SVA_D	8.11111
SVA_D	9.53333
SVA_D	10.3111
SVA_D	7.98611
SVA_D	13.1111
SVA_D	16.4444
SVA_D	10.5556
SVA_D	10.7778
SVA_D	13.7778
SVA_D	10.8333
SVA_D	12.8889
SVA_D	11.5917
SVA_D	4
SVA_D	8.7
SVA_D	11.4833
SVA_D	13.7583
SVA_D	13.1111
SVA_D	8.33333
SVA_D	12
SVA_D	12.8889
SVA_D	13.65
SVA_D	12.5667
SVA_D	14.2222
SVA_D	10.7667
SVA_D	10.5083
SVA_D	7.55556
SVA_D	13.1111
SVA_D	12.5556
SVA_D	11.1583
SVA_D	11.2
SVA_D	8.55556
SVA_D	12
SVA_D	12.8889
SVA_D	14.2222
SVA_D	9.55556
SVA_D	11.8889
SVA_D	13.1111
SVA_D	9.88889
SVA_D	13
SVA_D	11.775
SVA_D	13.7583
SVA_D	11.1583
SVA_D	19.7778
SVA_D	12.8889
SVA_D	17.5556
SVA_D	11.7778
SVA_D	13.65
SVA_D	8.625
SVA_D	6.76667
SVA_D	15.3333
SVA_D	16.4444
SVA_D	13.1111
SVA_D	16.4444
SVA_D	13.1111
SVA_D	10.4
SVA_D	7.81111
SVA_D	11.5556
SVA_D	14.8417
SVA_D	0
SVA_D	14.1111
SVA_D	14.2222
SVA_D	14.2222
SVA_D	13.1111
SVA_D	12.675
SVA_D	20.2583
SVA_D	11.1944
SVA_D	9.66667
SVA_D	15.3333
SVA_D	13.1111
SVA_D	11.9278
SVA_D	10.6667
SVA_D	12
SVA_D	13.5417
SVA_D	17.9833
SVA_D	13.1111
SVA_D	14
SVA_D	9.77778
SVA_D	13.9583
SVA_D	15.4
SVA_D	14.2222
SVA_D	12
SVA_F	14
SVA_F	12.2444
SVA_F	14
SVA_F	13.7778
SVA_F	11.2667
SVA_F	13.7583
SVA_F	16.2222
SVA_F	11.8889
SVA_F	13
SVA_F	15.8889
SVA_F	14
SVA_F	13
SVA_F	8.34167
SVA_F	11.6111
SVA_F	12.3333
SVA_F	17.5556
SVA_F	14
SVA_F	13.65
SVA_F	12.8889
SVA_F	14
SVA_F	16
SVA_F	11.4833
SVA_F	11.6667
SVA_F	14.2222
SVA_F	15.3333
SVA_F	14
SVA_F	12.7778
SVA_F	8.44444
SVA_F	17.6583
SVA_F	10.2778
SVA_F	10
SVA_F	14.4611
SVA_F	14.2222
SVA_F	12.5667
SVA_F	12
SVA_F	14.2222
SVA_F	13.5333
SVA_F	11.4444
SVA_F	16.9
SVA_F	10.5556
SVA_F	16.4444
SVA_F	14.2222
SVA_F	13
SVA_F	14.1111
SVA_F	12.9833
SVA_F	12.7778
SVA_F	12
SVA_F	12.675
SVA_F	14.2222
SVA_F	14.2222
SVA_F	11.6667
SVA_F	14.1111
SVA_F	19.5556
SVA_F	11.8222
SVA_F	8.66667
SVA_F	14.2222
SVA_F	12.8889
SVA_F	13.7583
SVA_F	12
SVA_F	14
SVA_F	13.175
SVA_F	13.65
SVA_F	14.1111
SVA_F	29.0333
SVA_F	16.2222
SVA_F	14
SVA_F	13.8889
SVA_F	14.2222
SVA_F	12.2444
SVA_F	13.1111
SVA_F	12.7778
SVA_F	0
SVA_F	14
SVA_F	14

## Sheet: Sheet4
Figure2-source data 4: Raw. Violin plots showing VNTR1 copy number of SVA_A classified by its DNA methylation status in male hPGCs at 19 weeks of gestation.
chr	start	end			group	copy
chr1	113270956	113272032	SVA_A	+	low	2.66667
chr1	167740243	167741395	SVA_A	-	low	4.88889
chr12	123856249	123857401	SVA_A	+	low	6
chr4	159680330	159681480	SVA_A	+	low	4.31667
chr3	88352345	88353485	SVA_A	+	low	4.83056
chr12	120715293	120716864	SVA_A	-	low	17.1111
chr15	77191490	77192696	SVA_A	+	low	6.88611
chr21	45316837	45318036	SVA_A	-	low	6.88611
chr13	98426696	98427764	SVA_A	+	medium	2.67222
chr18	12242895	12244175	SVA_A	+	medium	9.04444
chr5	77056219	77057475	SVA_A	+	medium	6.93333
chr17	80411076	80412333	SVA_A	-	medium	8.11111
chr10	43824274	43826082	SVA_A	+	medium	24.8333
chr7	26215479	26217248	SVA_A	-	medium	21.0306
chr15	56832341	56833618	SVA_A	+	medium	7.60556
chr9	99892019	99893568	SVA_A	-	medium	11.6111
chr17	19588125	19589107	SVA_A	+	medium	7.98611
chr7	128855557	128857119	SVA_A	+	medium	16.575
chr8	48049109	48050300	SVA_A	+	medium	7.41111
chr7	154887999	154889161	SVA_A	-	medium	4.52222
chr5	56813728	56815025	SVA_A	-	medium	10.0722
chr11	113394356	113395538	SVA_A	+	medium	5.96111
chr10	64688026	64689314	SVA_A	-	medium	8.71111
chr12	66568197	66569511	SVA_A	+	medium	10.2083
chr1	167774885	167776296	SVA_A	-	medium	11.1222
chr6	63873239	63875126	SVA_A	+	medium	25.4889
chr9	107078317	107079714	SVA_A	+	medium	11.7611
chr10	43737943	43739850	SVA_A	+	medium	26.2833
chr20	5432972	5434810	SVA_A	+	medium	26.0056
chr6	30189273	30190470	SVA_A	-	medium	8.34167
chr6	52689549	52691167	SVA_A	+	medium	19.825
chr7	129302607	129304014	SVA_A	-	medium	12.1278
chr1	160501234	160503102	SVA_A	+	medium	25.875
chr12	62403916	62405545	SVA_A	+	medium	18.6833
chr9	26491971	26493977	SVA_A	+	high	29.7806
chr15	68513548	68515479	SVA_A	+	high	26.5167
chr11	516847	518179	SVA_A	+	high	11.2444
chr6	69830897	69832395	SVA_A	-	high	13.9944
chr3	57372027	57373421	SVA_A	+	high	12.6417
chr19	53223022	53224976	SVA_A	-	high	26.4889
chr5	100120896	100122138	SVA_A	+	high	7.91389
chr12	58058224	58060126	SVA_A	+	high	24.1667
chr3	101269748	101271340	SVA_A	+	high	18.5194
chr18	18716991	18718480	SVA_A	-	high	14.5667
chr17	47496177	47497847	SVA_A	-	high	18.6083
chr22	50427777	50429062	SVA_A	-	high	7.6
chr4	41492297	41494480	SVA_A	-	high	32.6833
chr11	37452012	37453893	SVA_A	-	high	24.975
chr18	47943254	47944827	SVA_A	-	high	15.6222
chr7	138909642	138911725	SVA_A	+	high	32.2722
chr12	46393389	46394911	SVA_A	+	high	8.42778
chr5	133192864	133194574	SVA_A	-	high	19.6778
chr9	101225885	101227416	SVA_A	+	high	15.3806
chrX	74553763	74556198	SVA_A	-	high	39.4667
chr1	225983294	225984581	SVA_A	-	high	7.60556
chr9	103154466	103156164	SVA_A	+	high	19.8361
chr5	49903279	49904972	SVA_A	+	high	20.1444
chr7	54511196	54512827	SVA_A	+	high	19.2194
chr6	170256026	170257805	SVA_A	-	high	20.8639
chr20	9365446	9366935	SVA_A	-	high	14.7583
chrX	69568202	69570389	SVA_A	-	high	32.5806
chr9	106996513	106998391	SVA_A	-	high	24.1722
chrX	27475931	27477677	SVA_A	+	high	21.9556
chr8	118438441	118440313	SVA_A	+	high	24.8722
chr10	32794136	32795781	SVA_A	-	high	20.2667
chr9	35182468	35184754	SVA_A	-	high	36.0889
chr2	188501014	188502909	SVA_A	-	high	25.0778
chr4	110598972	110600803	SVA_A	-	high	24.2556
chr7	44909929	44912260	SVA_A	-	high	36.2806
chr10	60003130	60004819	SVA_A	+	high	19.9389
chr5	176410225	176412107	SVA_A	+	high	24.7694
chr5	71089137	71091085	SVA_A	-	high	29.1111
chr1	114784472	114786364	SVA_A	+	high	24.7917
chr11	72620084	72621885	SVA_A	+	high	23.6444
chr5	50069671	50071412	SVA_A	-	high	21.3444
chr7	33343130	33344762	SVA_A	+	high	18.6889
chr3	93762524	93764304	SVA_A	+	high	23.2278
chr7	91655618	91657622	SVA_A	+	high	27.1333
chr2	86771466	86773523	SVA_A	-	high	29.7667
chr3	41881836	41883645	SVA_A	+	high	12.7444
chr2	184655950	184658043	SVA_A	-	high	31.0389

## Sheet: Sheet5
Figure2-source data 5: Raw. Violin plots showing the number of ZNF257 and ZNF28 motifs in SVA_A classified by DNA methylation status in male hPGCs at 19 weeks of gestation.
					group	copy			Methylation	L1PA within 1kb	Hammoud 1	Hammoud 2	ZNF257 peak	ZNF28 peak	ZNF257 motif Homer_ZNF257_GGCGCTCCTCAC_1e-55 Q0.00005	ZNF28 motif Homer_ZNF28_GRGCACCTCTGC_1e-194 Q0.00005
chr1	113270956	113272032	SVA_A	+	low	2.66667	414--509	GCCTCTGCCTGGCCGCCACCCCATCTAGGAAGTGAGGAGC	0.0744444	0	0.940495	0.813921	0	0	2	0	2
chr1	167740243	167741395	SVA_A	-	low	4.88889	419--590	GCCTCTGCCCGGCCGCCACCCCGTCTGGGAAGTGAGGAGC	0.0868421	0	0.926852	0.936285	0	0	2	0	2
chr12	123856249	123857401	SVA_A	+	low	6	387--599	GCCTCTGCCCGGCCGCCACCCCGTCTGGGAAGTGGGGAGC	0.0922399	0	0.937143	0.798693	0	0	0	0	0
chr4	159680330	159681480	SVA_A	+	low	4.31667	412--572	GCCTCTGCCCGGCCGCCACGTCTGGGAAGTGAGGAGC	0.115424	0	0.962762	0.693026	0	0	0	0	0
chr3	88352345	88353485	SVA_A	+	low	4.83056	423--605	GCCTCTGCCCGGCCGCCCCATCTGGGAAGTGAGGAGC	0.120148	0	0.293875	0.0596318	0	0	2	0	2
chr12	120715293	120716864	SVA_A	-	low	17.1111	434--1019	GCCTCTGCCCGGCCGCCACCCCGTCTGGGAGGCGAGGAGC	0.165533	0	0.92103	0.267745	0	0	2	11	13
chr15	77191490	77192696	SVA_A	+	low	6.88611	427--679	GCCCGGCCGCCCCGTCTGGGAAGTGAGGAGCACCTCT	0.181551	0	0.939719	0.905753	0	0	0	3	3
chr21	45316837	45318036	SVA_A	-	low	6.88611	401--652	GCCTCTGCCCGGCCGCCCCCTCTGGGATGTGAGGAGC	0.195915	0	0.761753	0.606864	0	0	3	0	3
chr13	98426696	98427764	SVA_A	+	medium	2.67222	434--535	CTGCCTGGCCGCCCCGTCTGGGAAGAGAGGAGCGCCC	0.217143	0	0.172597	0.0413733	0	0	0	0	0
chr18	12242895	12244175	SVA_A	+	medium	9.04444	429--749	GCCTCTGCCCGGCTGCCCCGTCTGGGAGGTGAGGAGC	0.267455	0	0.434036	0.183218	0	0	5	0	5
chr5	77056219	77057475	SVA_A	+	medium	6.93333	430--682	GCCTCTGCCCGGCCACCCATCGTCTGGGAAGTGAGGAGC	0.277778	0	0.956091	0.945129	0	0	2	2	4
chr17	80411076	80412333	SVA_A	-	medium	8.11111	412--698	GCCTCTGCCCGGCCGCCACCCTGTCTGGGAAGTGAGGAGC	0.279806	0	0.953079	0.944702	1	0	3	0	3
chr10	43824274	43826082	SVA_A	+	medium	24.8333	377--1277	GCCTCTGCCCGGCCGCCCCATCTGGGAAGTGAGGAGCGCCTCTGCCCGGCCGCCCTCGTCTGGGATGTGAGGAGCGCCTCTGCCCGGCCGCCCCGTCTGGGAAGTGAGGGTGCACTCTGCCCGGCCACCCCATCTGGGAAGTGAGGAGC	0.300079	0	0.695911	0.341606	1	1	7	12	19
chr7	26215479	26217248	SVA_A	-	medium	21.0306	430--1191	GCCACCCATCGTCTGGGAAGTGAGGAGCGCCTCTGCCTGGCCACCCCGTCTGGGAAGTGAGGAGCGCCTCTGCCTGGCCACCCCGTCTGGGATGTGAGGAGCGCCTCTGCCCG	0.323118	0	0.944985	0.905435	1	1	16	16	32
chr15	56832341	56833618	SVA_A	+	medium	7.60556	437--720	GCCTCTGCCCGGCCGCCCCGTCTGGGATGTGAGGAGC	0.341796	2	0.459251	0.061796	0	0	4	0	4
chr9	99892019	99893568	SVA_A	-	medium	11.6111	399--815	GCCACCACCATCTGGGAAGTGAGGAGCGCCTCTGCCTG	0.34619	0	0.938901	0.960672	1	1	6	11	17
chr17	19588125	19589107	SVA_A	+	medium	7.98611	436--722	GCCTCTGCCCGGCTGCCACCACTCTAGGAAGTGAGGAGCGTCTCTGCCTGGCCGCCCATCATCTGGGATGTGAGGAGCCCCTCTGCCTGGCCACCCCATCTGGGAAGTGAGGAGC	0.35907	0	0.789908	0.754778	0	0	1	0	1
chr7	128855557	128857119	SVA_A	+	medium	16.575	419--1027	GCCTCTGCCCGGCCACCACCCCATCTGGGAAGTGAGGAGCGCCTCTGCCCGGCCGCCCTCGTCTGAGAAGTGAGGAGCCCCTCTGCCCGGCCGCCCCGTCTGGGATGTGAGGAGCGCCTCTGCCCGGCCGCCCACGTCTGGGATGTGAGGAGC	0.364538	0	0.9356	0.922109	1	0	5	9	14
chr8	48049109	48050300	SVA_A	+	medium	7.41111	415--677	GCCTCTGCCCAGCCGCCGCCCCGTCTAGGAAGTGAGGAGCGTCTCTGCCTGGCCGCCCATCGTATGGGATGTGAGGAGCCCCTCTGCCCAGCCACCCCCTCTGGGAAGTCAGGAGC	0.367978	0	0.852012	0.841825	0	0	0	0	0
chr7	154887999	154889161	SVA_A	-	medium	4.52222	442--610	CCTCTGCCCGGCCGCCCCGTCTGGGATGTGAGGAGCC	0.373079	0	0.459408	0.316798	0	1	0	0	0
chr5	56813728	56815025	SVA_A	-	medium	10.0722	386--765	GCCTCTGCCCAGCCGCCCCGTCTGGGAAGTGAGGAGC	0.430886	0	0.903669	0.738066	0	0	4	0	4
chr11	113394356	113395538	SVA_A	+	medium	5.96111	428--646	GCCTCTGCCCGGCCGCCCCGTCTGGGAAGTGAGGAGC	0.434895	0	0.394528	0.101565	0	0	3	0	3
chr10	64688026	64689314	SVA_A	-	medium	8.71111	438--752	CCCCGTCTGGGAAGTGAGGAGCGCCTCTGCCCGGCCGCCCTTGTCTGGGAAGTGAGGAGTGCCTCTGCCCGGCCGCCCCGTCTGGGAATGAGGAACACCTCTGCCCAGCCGC	0.443452	0	0.793904	0.333534	0	0	4	0	4
chr12	66568197	66569511	SVA_A	+	medium	10.2083	404--779	GCCTCTGCCCGGCTGCCCCGTCTGGGAAGTGGGGAGCGTCTCTGCCTGGCCGCCCTCGTCTGGGAGGTGGGGAGC	0.445322	0	0.749871	0.315425	1	0	2	0	2
chr1	167774885	167776296	SVA_A	-	medium	11.1222	440--839	GCCTCTGCCCGGCCGCCACCCTGTCTGGGAAGTGAGGAGCGCCTCTGCCCGGCCGCCCCGTCTGGGAAGTGAGGAGC	0.457636	0	0.880676	0.927984	0	0	6	7	13
chr6	63873239	63875126	SVA_A	+	medium	25.4889	419--1357	GCCTCTGCCCGGCCGCCCCATCTGGGAAGTGAGGAGC	0.466232	0	0.362041	0.264227	0	1	9	11	20
chr9	107078317	107079714	SVA_A	+	medium	11.7611	442--866	GCCACCCCGTCTGGGAGGTGAGGGGCGCCTCTGCCCGGCCGCCCAGTCTGGGAAGTGAGGAGCGCCTCTGCCCGGCCACCCCGTCTGGGAAGTGAGGAGCGCCTCTGCCCGGCCGCCCCATCTGGGAGGTGGGGCGCCTCTGCCCA	0.471613	0	0.170487	0.0688823	0	0	5	0	5
chr10	43737943	43739850	SVA_A	+	medium	26.2833	440--1376	GCCTCTGCCCGGCCGCCCCCCGTCTGGGAAGTGAGGAGCGTCTCTGCCCGGCCGCCCTCGTCTGGGAAGTGAGGAGCGCCTCTGCCCGGCCGCCCCATCTGGGAAGTGAGGAGC	0.472673	0	0.860638	0.842471	1	1	6	0	6
chr20	5432972	5434810	SVA_A	+	medium	26.0056	377--1317	GCCTCTGCCCGGCCGCCCCGTCTGGGAAGTGAGGAGCGCCTCTGCCCGGCCGCCCATCGTCTGGGAAGTGAGGAGCGCTCTGCCCGGCCACCCATCGTCTGGGAGGTGAGGAGCGCCTCTGCCCGGCCGCCCCGTCTGGGAAGTGAGGAGC	0.51303	0	0.127206	0.0420516	2	0	18	10	28
chr6	30189273	30190470	SVA_A	-	medium	8.34167	377--673	GCCTCTGCCCGGCCGCCACCCCGTCTGGGAAGTGAGGAGCGCCTCTGCCCGGCCGCCCCGTCTGGGATGTGAGGAGC	0.535462	0			0	0	3	0	3
chr6	52689549	52691167	SVA_A	+	medium	19.825	368--1073	GCCTCTGCCCGGCTGCCACCTCGTCCAGGAAGTGAGGAGTGCCTCTGCCTGGCCACCCATCATCTGGGAAGTGAGGAGCGCCTATGCCCGGCCACCCACGTCTGGGAAGTGAGGAGT	0.559161	0	0.896181	0.858386	1	1	11	0	11
chr7	129302607	129304014	SVA_A	-	medium	12.1278	434--888	GCCTCTGCCCGGCCGCCCCGTCTGGGAAGTGAGGAGC	0.57434	0	0.935987	0.926222	1	0	5	0	5
chr1	160501234	160503102	SVA_A	+	medium	25.875	366--1290	GCCTCTGCCCAGCCGCCACCCCGTCTGGGAGGTGAGGAGCGTCTCTGCCCGGCCGCCCTCGTCTGGGAAGTGAGGAGCGCCTCTGCCCGGCCACCCCATCTGGGAAGTGAGGAGC	0.593312	0	0.920173	0.838276	1	1	0	4	4
chr12	62403916	62405545	SVA_A	+	medium	18.6833	427--1094	CTCTGCCCGGCCGCCCTCGTCTGGGAGGTGGGGAGCGC	0.598093	0	0.161072	0.0478439	0	1	8	13	21
chr9	26491971	26493977	SVA_A	+	high	29.7806	405--1480	CCCCATCTGGGAGGTGAGGAGCGCCTCTGCCCGGCCGCCCCCGTCTGGGAGGTGAGGAGCACCTCTGCCCGGCCGCACCCTGTCTGGGAGGTGAGGAGCGCCTCTGCCCGGCCGCCCCGTCTGGGATGTGAGGAGCACCTCTGCCCGGCCG	0.601152	0	0.918166	0.846862	1	0	8	14	22
chr15	68513548	68515479	SVA_A	+	high	26.5167	426--1397	CTCTGCCCGGCCGCCCCGTCTGGGAGGTGAGGAGCGCCTCTGCCCGGCCGCCCCGTCTGGGAAGTGAGGAGCGCCTCTGCCCGGCCGCCCCGTCTGGGAAGTGAGGAGCGC	0.607533	0	0.902653	0.880953	1	1	10	17	27
chr11	516847	518179	SVA_A	+	high	11.2444	405--807	GCCTCTGCCCGGCCGCCCCACCTGGGAAGTGAGGAGCACCTCTGCCCAGCCACCCATCATCTGGAAGGTGAGGAGCGCCTCTGCCCGACCGCCCCGTCTGGGAAGTGGGCGCCTCTGCCCAGCCGCCCCATCTGGGAGGTGAGGAGCACCTCTGCCCGGCCACCCCGTCTGGGAGGTGAGGAGT	0.610684	0	0.923631	0.85865	1	1	0	0	0
chr6	69830897	69832395	SVA_A	-	high	13.9944	451--966	CCCCATCTGGGAAGTGAGGTGCGCCTCTGCCCGGCCGCCACCCCGTCTGGGAAGTGAGGAGCACCTCTGCCTGGCCGCCCATCATCTGGGATGTGAGGAGCGCCTCTGCCCAGCCGCCCAGTCTGGGAGGAGAGGAGCGCCTCCACCTGGCCGCCCCATCTGGGAAGTGAGGAGCGCCTCTGCTGCCCGCCACCCCATCTGGGAAGTGAGGAGCGCCTCTGTCCCGCCG	0.611806	0	0.924984	0.853661	0	0	7	0	7
chr3	57372027	57373421	SVA_A	+	high	12.6417	354--820	GCCCGGCCGCCCCGTCTGGGAAGTGAGGAGCGCCTCT	0.61827	0	0.912163	0.874041	1	0	8	7	15
chr19	53223022	53224976	SVA_A	-	high	26.4889	429--1395	GCCTCTGCCCGGCCGCCCCGTCTGGGAAGTGAGGAGCGCCTCTGCCCGGCCGCCCCGTCTGGGAAGTGAGGAGCGCCTCTGCCTGACGCGCCCTGTCTGGGAAGTGAGGAGCGCCTCTGCCCGGCCGCCCCATCTGGGAAGTGAGGAGC	0.618525	0	0.947773	0.939573	1	1	13	15	28
chr5	100120896	100122138	SVA_A	+	high	7.91389	380--665	GCCTCTGCCCGGCTGCCCCGTCTGGGAAGTGAGGAGCACCTCTGCCTGGCCGCCGCCCCATCTGGGAAGTGAGGAGC	0.620834	2	0.932455	0.900753	0	0	0	2	2
chr12	58058224	58060126	SVA_A	+	high	24.1667	434--1321	GCCTCTGCCCGGCTGCCCATCGTCTGGGAAGTGAGGAGCACCTCTGCCTGGCCGCCCCATCTAGGAAGTGAGGAGCACCTCTGCCCGGCCACCCCGTCTGGGAAGTGAGGAGCGCCTCTGCCCGGCCGCCCTGTCTGGGAAGTGAGGAGC	0.624075	0	0.914248	0.955885	0	1	14	15	29
chr3	101269748	101271340	SVA_A	+	high	18.5194	387--1057	GCCTCTGCCCGGCCGCCACCCGTCTAGGAAGTGAGGAGCGTCTCTGCCCGGCCGCCCCGTCTGGGAAGTGAGGAGCGCCTCTGCCCGGCCGCCCCGTCTGGGAAGTGAGGAGC	0.625674	0	0.917085	0.908466	1	1	2	0	2
chr18	18716991	18718480	SVA_A	-	high	14.5667	430--957	GCCTCTGCCGGCCGCCACCCCGTCTGGGAAGTGAGGAGCGCCTCTGCCCGGCCACCCCGTCTGGGAAGTGAGGAGC	0.62881	0	0.952808	0.601834	0	1	0	0	0
chr17	47496177	47497847	SVA_A	-	high	18.6083	428--1090	GCCTCTGCCCGGCCGCCACCCCATCTGGGAAGTGAGGAGCGCCTCTGCCCGGCCGCCCCATCTGGGAAGTGAGGAGC	0.634979	0	0.939605	0.92009	1	1	10	13	23
chr22	50427777	50429062	SVA_A	-	high	7.6	442--714	GCCACCCCCGTCTGGGAAGTGAGGAGCGCCTCTGCCCGGCCGCCCACTATCTAGGAAGTGAGGAGCGCCTCTGCCCGGCTGCCCCGTCTGGGAAGTGAGGAGCGCCTCTGCCCG	0.637166	0	0.945339	0.926092	1	0	6	0	6
chr4	41492297	41494480	SVA_A	-	high	32.6833	455--1653	CTGCCCGGCCGCCCCGTCTGGGAAGTGAGGAGCGCCTCTGCCTGGCCGCCCCGTCTGGGAAGTGAGGAGCGCCT	0.639625	0	0.936783	0.820179	0	1	15	20	35
chr11	37452012	37453893	SVA_A	-	high	24.975	425--1349	GTCTGGGAAGTGAGGAGCGCCTCTGCCTGGCCGCCCC	0.641534	2	0.79604	0.763611	0	1	11	0	11
chr18	47943254	47944827	SVA_A	-	high	15.6222	409--990	GCCTCTGCCCGGCCGCCCCGTCTGGGAAGTGAGGAGC	0.64353	1	0.894962	0.710625	1	1	7	8	15
chr7	138909642	138911725	SVA_A	+	high	32.2722	391--1549	CCCCGTCTGGGAGATGAGGAGCGCCTCTGCCCGGCCG	0.649863	0	0.950448	0.687945	1	0	14	18	32
chr12	46393389	46394911	SVA_A	+	high	8.42778	469--774	CGGCCGCCCCGTCTGGGATGTGAGGAGCGCCTCTGCC	0.652329	0	0.92429	0.782119	0	0	9	8	17
chr5	133192864	133194574	SVA_A	-	high	19.6778	433--1137	GCCTCTGCCCGGCCGCCCCGTCTGGGAAGTGAGGAGCGCCTCTGCCTGGCCGCCGCCCCGTCTGGGAAGTGAGGAGC	0.664323	0	0.933423	0.924508	1	0	9	10	19
chr9	101225885	101227416	SVA_A	+	high	15.3806	435--1000	GCCTCTGCCCGGCCGCCCCCGTCTGAGGAAGTGAGGAGCACCTCTACCTGGCCACCCCATATGGGAAGTGAGGAGCGCCTCTGCCTGGCCGCCCCGTCTGGGAAGTGAGGAGC	0.665853	0	0.93478	0.88512	0	0	9	0	9
chrX	74553763	74556198	SVA_A	-	high	39.4667	460--1904	CCCCATCTGGGAAGTGAGGAGCGCCTCTGCCCGGCCG	0.670952	0	0.778386	0.767758	0	1	16	20	36
chr1	225983294	225984581	SVA_A	-	high	7.60556	433--712	GCCTCTGCCCGGCCGCCCCGTCTGGGAAGTGAGGAGC	0.67267	0	0.939934	0.939875	0	0	5	0	5
chr9	103154466	103156164	SVA_A	+	high	19.8361	436--1163	CCCCGTCTGGGAAGTGAGGAGCGCCTCTGCCCGGCCG	0.682263	0	0.92849	0.918253	1	0	12	12	24
chr5	49903279	49904972	SVA_A	+	high	20.1444	439--1162	GCCACCCCGTCTGGGAAGTGAGGAGCGCCTCTGCCCGGCCACCCCGTCTGGGAGGTGGGGGCGCCTCTGCCCGGCCGCCCCGTCTGGGAAGTGAGGAGCGCCTCTGCCCAGGCCGCCCCATCTGGGAAGTGAGGGGCACCTCTGCCCG	0.688133	0	0.445906	0.127739	0	1	7	0	7
chr7	54511196	54512827	SVA_A	+	high	19.2194	384--1100	GCCTCTGCCCGGCCGCCCCGTCTGGGAAGTGAGGAGC	0.693237	0	0.851719	0.681341	0	0	10	10	20
chr6	170256026	170257805	SVA_A	-	high	20.8639	464--1247	CTGGGAAGTGAGGAGCGCCTCTGCCCGGCCGCCCCGA	0.694224	0	0.952532	0.955692	1	1	10	9	19
chr20	9365446	9366935	SVA_A	-	high	14.7583	420--949	GCCTCTGCCCGGCCGCCACCCCGTCTGGGAGGTGAGGAGCGCCTCTGCCCGGCCGCCCCGTCTGGGAAGTGAGGAGC	0.708382	1	0.921571	0.914861	0	0	5	10	15
chrX	69568202	69570389	SVA_A	-	high	32.5806	439--1651	GCCTCTGCCCGGCCGCCCCGTCTGGGAAGTGAGGAGC	0.716255	0	0.935087	0.846879	1	0	18	15	33
chr9	106996513	106998391	SVA_A	-	high	24.1722	468--1342	AAGTGAGGAGCGTCTCTGCCCACCCGCCCATCGTCTGGGAAGTGAGGAGCACCTCTGCCCGGCCGCCCTAGTCTGGGAAGTGAGGAGCGCCTCTGCCCGGCCGCCCATCGTCTGGGAGGTGAGGAGCGCCTCTGCCCGGCCGCCCATCATCTGGGAAGTGAGGAGCGCCTCTGCCCGGCCGCCCCATCTGGGAAGTGAGGAGCGCCTCTGCCCGGCCGCCCCGTCTGGG	0.721664	0	0.835649	0.730143	1	0	12	18	30
chrX	27475931	27477677	SVA_A	+	high	21.9556	430--1223	GCCTCTGCCCGGCCGCCCCCTGTCTGGGAAGTGAGGAGCGCCTCTGCCCGGCCACCCCGTCTGGGAAGTGAGGAGC	0.722842	0	0.908851	0.355464	0	0	11	13	24
chr8	118438441	118440313	SVA_A	+	high	24.8722	368--1294	GCCTCTGCCCGGCCGCCCCGTCTGGGAAGTGAGGAGC	0.729212	3	0.879	0.824621	1	0	9	14	23
chr10	32794136	32795781	SVA_A	-	high	20.2667	400--1129	GCCACCCACGACTGGGAAGTGAGGAGCGCCTCTGCCCGGCCGCCCTGTCTGGGATGTGAGGAGCACCTCTGCCCGGCCACCCCGTCTGGGAGGAAGTGAGGAGCGCCTCTGCCCGGCAGCCCCGAATGGGAAGTGAGGAGCGCCTCTGCCCG	0.738086	0	0.944077	0.930256	0	0	6	10	16
chr9	35182468	35184754	SVA_A	-	high	36.0889	434--1750	GCCTCTGCCCGGCCGCCCCGTCTGGGAGGTGAGGAGCGCCTCTGCCCGGCCGCCCCGTCTGGGAGGTGAGGAGCGCCTCTGCCCGGCCGCCCTCGTCTGGGAGGTGAGGAGC	0.739129	0	0.912626	0.68845	1	1	17	23	40
chr2	188501014	188502909	SVA_A	-	high	25.0778	444--1364	CCCCGTCTGGGAAGTGAGGAGCGCCTCTGCCCGGCCG	0.741923	0	0.582668	0.286532	1	0	9	10	19
chr4	110598972	110600803	SVA_A	-	high	24.2556	386--1287	GCCTCTGCCCGGCCGCCCCGTCTGGGAAGTGAGGAGCGCCTCTGCCCGGCCGCCCCGTCTGGGAAGTGAGGAGC	0.746291	0	0.935292	0.92399	1	0	12	14	26
chr7	44909929	44912260	SVA_A	-	high	36.2806	463--1799	CCCCGTCTGGGAAGTGAGGAGCGCCTCTGCCCGGCCG	0.747597	0	0.848638	0.699949	1	1	18	22	40
chr10	60003130	60004819	SVA_A	+	high	19.9389	421--1150	CCCCGTCTGGGAAGTGAGGAGCGCCTCTGCCCGGCCGCCCCGTCTGGGAGGTGAGGAGCGCCTCTGCCCGGCCG	0.756318	1	0.859131	0.538704	1	1	7	0	7
chr5	176410225	176412107	SVA_A	+	high	24.7694	441--1349	GAAGTGAGGAGCGCCTCTGCCCGGCCGCCCCGTCTGG	0.761524	0	0.91093	0.95518	1	0	18	10	28
chr5	71089137	71091085	SVA_A	-	high	29.1111	378--1395	GCCTCTGCCCGGCCGCCACCCCATCTGGGAAGTGAGGAGC	0.773439	3	0.880269	0.824464	1	1	11	15	26
chr1	114784472	114786364	SVA_A	+	high	24.7917	458--1363	CTCTGCCCTGGCCGCCCCGTCTGGGAGGTGAGGAGCGCCTCTGCCCGGCCGCCCCATCTGGGAGGTGAGGAGCGC	0.781035	3	0.867506	0.891868	0	0	13	13	26
chr11	72620084	72621885	SVA_A	+	high	23.6444	400--1274	GCCTCTGCCCGGCCACCCCATCTGGGAAGTGAGGAGCACCTCTGCCCGGCCGCCCCATCTGGGAGGTGAGGAGCGCCTCTGCCCGGCCGCCCTCATCTGGGAAGTGAGGAGC	0.79223	0	0.916471	0.893025	1	1	9	15	24
chr5	50069671	50071412	SVA_A	-	high	21.3444	407--1166	GCCTCTGCCCGGCCGCCCCGTCTGGGAAGTGAGGAGCGCCTCTGCCCGGCCGCCCATCGTCTGGGAAGTGAGGAGCGCCTCTGGCCGGCCGCCCCGTCTGGGAAGTGAGGAGC	0.797533	0	0.952369	0.926941	1	0	11	15	26
chr7	33343130	33344762	SVA_A	+	high	18.6889	393--1055	GCCTCTGCCCGGCCGCCACCCCGTCTAGGAAGTGAGGAGCGTCTCTGCCTGGCCGCCCATCGTCTGGGATGTGAGGAGCGCCTCTGCCCGGCCACCCCGTCTGGGAAGTGAGGAGC	0.80526	0	0.887554	0.887227	1	0	6	9	15
chr3	93762524	93764304	SVA_A	+	high	23.2278	388--1247	CTGCCCGGCCGCCCCGTCTGGGAAGTGAGGAGCGCCT	0.815789	0	0.925162	0.937473	1	0	15	13	28
chr7	91655618	91657622	SVA_A	+	high	27.1333	432--1430	GCCTCTGCCCGGCCGCCCCGTCTGGGAAGTGAGGAGC	0.826415	0	0.946768	0.956743	1	0	13	16	29
chr2	86771466	86773523	SVA_A	-	high	29.7667	445--1526	CGTCTGGGAGGTGAGGAGCGCCTCTGCCCGGCCGCCCT	0.840301	0	0.953467	0.946849	1	1	24	24	48
chr3	41881836	41883645	SVA_A	+	high	12.7444	820--1276	GCCCCGTCTGGGAGGTGAGGAGCGCCTCTGCCCGGCC	0.845405	0	0.95319	0.933964	1	1	10	14	24
chr2	184655950	184658043	SVA_A	-	high	31.0389	411--1559	CATCTGGGAAGTGAGGAGCGCCTCTGCCCGGCCGCCC	0.858601	1	0.949663	0.914463	0	1	14	17	31
