# Supplementary material for: Potential role of KRAB-ZFP binding and transcriptional states on DNA methylation of retroelements in human male germ cells
Source: eLife. 2022 Mar 22;11:e76822. doi: 10.7554/eLife.76822 (PMC8967385; doi:10.7554/eLife.76822)
Supplement: Figure 3—source data 1. [file elife-76822-fig3-data1.xlsx]

## Sheet: Sheet1
Figure3-source data 1: Raw. Bar graphs showing the fraction of full-length L1 copies with ZNF93 and ZNF649 peaks.
	Both	ZNF93	ZNF649	Not
L1HS	1	2	1	32
L1PA2	5	5	103	277
L1PA3	181	74	240	250
L1PA4	282	139	163	165
L1PA5	99	42	242	214
L1PA6	27	63	56	232
L1PA7	3	21	3	300
L1PA8	0	5	1	52

## Sheet: Sheet2
Figure3-source data 2: Raw. Bar graphs showing the fraction of L1 copies with ZNF93 and ZNF649 peaks.
Peak number
ZNF93	Low	Medium	High	LowTot	MedTot	HighTot	Prop test Low vs High	Low	Medium	High
L1PA2	4	4	2	112	225	53	0.9484	3.57143	1.77778	3.77358
L1PA3	9	132	114	68	419	258	2.809e-06	13.2353	31.5036	44.186
L1PA4	3	237	181	17	456	276	7.234e-05	17.6471	51.9737	65.5797
LAPA5	2	78	61	26	394	177	0.005866	7.69231	19.797	34.4633
L1PA6	14	62	14	70	259	49	0.278	20	23.9382	28.5714
L1PA7	7	15	2	113	196	18	0.4437	6.19469	7.65306	11.1111
ZNF649	Low	Medium	High	LowTot	MedTot	HighTot	Prop test Low vs High	Low	Medium	High
L1PA2	19	63	26	112	225	53	1.546e-05	16.9643	28	49.0566
L1PA3	14	208	199	68	419	258	2.2e-16	20.5882	49.642	77.1318
L1PA4	1	247	197	17	456	276	2.154e-08	5.88235	54.1667	71.3768
LAPA5	3	215	123	26	394	177	1.295e-08	11.5385	54.5685	69.4915
L1PA6	0	56	27	70	259	49	1.625e-12	0	21.6216	55.102
L1PA7	0	6	0	113	196	18	NA	0	3.06122	0

## Sheet: Sheet3
Figure3-source data 3: Raw. Bar graphs showing the fraction of L1 copies with ZNF93 and ZNF649 binding motifs.
Homer_ZNF649_GATATAATATCC_1e-6362 0.005
	Total			With Motif			%			P-value
	Low	Medium	High	Low	Medium	High	Low	Medium	High	Low-Medium	Low-High	Medium-High
L1HS	10	24	2	0	2	1	0	8.33333	50	0.3467	0.01952	0.07639
L1PA2	112	225	53	0	13	10	0	5.77778	18.8679	0.009476	2.106e-06	0.001857
L1PA3	68	419	258	7	217	201	10.2941	51.79	77.907	1.91e-10	2.2e-16	1.118e-11
L1PA4	17	456	276	3	301	202	17.6471	66.0088	73.1884	4.396e-05	1.244e-06	0.04231
L1PA5	26	394	177	10	255	136	38.4615	64.7208	76.8362	0.007198	4.786e-05	0.003954
L1PA6	70	259	49	4	58	26	5.71429	22.3938	53.0612	0.001545	4.797e-09	9.863e-06
L1PA7	113	196	18	0	5	0	0	2.55102	0	0.08694	NA	0.4929
Homer_ZNF93_GTATCAGCAGYG_1e-4343				0.005
	Total			With Motif			%			P-value
	Low	Medium	High	Low	Medium	High	Low	Medium	High	Low-Medium	Low-High	Medium-High
L1HS	10	24	2	0	1	0	0	4.16667	0	0.5123	NA	0.7685
L1PA2	112	225	53	0	5	3	0	2.22222	5.66038	0.112	0.01105	0.178
L1PA3	68	419	258	8	124	107	11.7647	29.5943	41.4729	0.002154	5.091e-06	0.001546
L1PA4	17	456	276	6	238	173	35.2941	52.193	62.6812	0.171	0.0245	0.005579
L1PA5	26	394	177	9	170	95	34.6154	43.1472	53.6723	0.3942	0.06948	0.0196
L1PA6	70	259	49	33	95	20	47.1429	36.6795	40.8163	0.1111	0.4944	0.583
L1PA7	113	196	18	40	66	5	35.3982	33.6735	27.7778	0.7584	0.5272	0.6112

## Sheet: Sheet4
Figure3-figure supplement 2-source data 1: Raw. Scatter plots showing the fraction of LTR12C copies, which overlap KRAB-ZFP peaks.
		LTR12			LTR12C			LTR12D			LTR12E
		Low	Medium	High	Low	Medium	High	Low	Medium	High	Low	Medium	High
GSE120539	ZNF850	0	0	0	1.51976	9.45083	24.9592	0	1.6129	9.09091	0	21.4286	33.3333
GSE78099	ZNF479	0	0	7.14286	13.0699	12.3883	11.9086	11.4286	0	3.0303	5	0	0
GSE78099	ZFP57-rep2	0	3.125	0	11.2462	7.27969	6.19902	22.8571	12.9032	6.06061	5	14.2857	8.33333
GSE78099	ZNF793	0	3.125	0	3.19149	3.19285	4.40457	8.57143	6.45161	6.06061	0	7.14286	0
GSE120539	ZNF251	0	0	0	2.12766	2.29885	4.24144	0	1.6129	9.09091	15	14.2857	0
GSE120539	ZNF763	0	0	0	6.53495	4.85313	2.77325	5.71429	3.22581	0	0	7.14286	0
GSE78099	ZFP57	0	0	0	4.55927	2.55428	2.61011	14.2857	9.67742	3.0303	5	7.14286	8.33333
GSE78099	ZNF669	0	0	0	0	1.27714	2.61011	0	3.22581	12.1212	0	0	0
GSE78099	ZNF793-rep2	0	0	0	0.455927	1.02171	1.46819	5.71429	4.83871	3.0303	0	0	0
GSE78099	ZNF605	0	0	0	3.03951	2.29885	1.30506	0	0	3.0303	5	0	0
GSE78099	ZNF2	0	0	0	9.42249	3.06513	1.14192	5.71429	3.22581	0	5	14.2857	0
GSE78099	ZNF506	0	3.125	0	1.51976	0.893997	1.14192	11.4286	11.2903	9.09091	0	0	8.33333
GSE120539	ZNF577	0	0	0	1.36778	0.383142	0.978793	5.71429	1.6129	0	0	7.14286	0
GSE120539	ZNF812	0	0	0	0.759878	1.78799	0.978793	2.85714	0	0	0	0	0
GSE78099	ZNF28	0	0	0	0.303951	0.766284	0.978793	0	1.6129	0	0	0	0
GSE78099	ZNF641	0	0	0	1.06383	0.63857	0.815661	0	0	0	5	0	0
GSE78099	ZNF682-rep2	0	0	0	1.06383	1.66028	0.815661	2.85714	0	0	0	0	0
GSE78099	ZNF519	0	0	0	1.21581	0.383142	0.652529	0	0	3.0303	0	0	0
GSE78099	ZNF649	0	0	0	1.06383	1.27714	0.652529	0	1.6129	3.0303	0	0	0
GSE120539	ZNF426	0	0	0	0.303951	0.383142	0.652529	2.85714	0	0	0	0	0
GSE120539	ZNF34	0	0	0	0.607903	0.63857	0.489396	0	0	3.0303	0	0	0
GSE78099	ZIM3	0	3.125	7.14286	0.455927	0.255428	0.489396	2.85714	0	3.0303	0	0	0
GSE78099	ZNF382-rep2	0	0	0	0	0.127714	0.489396	0	0	0	0	0	0
GSE78099	ZNF417	0	0	0	0.455927	0.255428	0.489396	0	1.6129	3.0303	0	0	0
GSE78099	ZNF558	0	3.125	0	1.51976	0.63857	0.489396	0	0	0	5	0	0
GSE78099	ZNF736	0	0	0	0.759878	1.14943	0.489396	5.71429	0	0	0	0	0
GSE78099	ZNF90	0	0	0	0.455927	0.127714	0.489396	2.85714	0	0	0	0	0
GSE78099	ZNF133	0	0	0	0.151976	0.127714	0.326264	2.85714	0	0	0	0	0
GSE78099	ZNF136	0	0	0	0	0	0.326264	0	0	0	0	0	0
GSE78099	ZNF382	0	0	0	0.151976	0.127714	0.326264	0	0	0	0	0	0
GSE78099	ZNF468	0	0	0	0	0.63857	0.326264	0	0	0	0	0	0
GSE78099	ZNF534	0	0	0	0.911854	0.383142	0.326264	0	0	0	0	0	0
GSE78099	ZNF682	0	0	0	0.607903	0.383142	0.326264	2.85714	0	0	0	0	0
GSE78099	ZNF707	0	0	0	0	0	0.326264	0	0	0	0	0	0
GSE120539	ZNF138	0	0	0	0.151976	0.510856	0.326264	0	0	0	0	0	0
GSE120539	ZNF195	0	0	0	0.455927	0.383142	0.326264	0	0	0	0	0	0
GSE120539	ZNF546	0	0	0	0.607903	0.255428	0.326264	0	0	0	0	0	0
GSE120539	ZNF772	0	0	0	0	0	0.326264	0	0	0	0	7.14286	0
GSE78099	PRDM9	0	0	0	0	0	0.163132	0	0	0	0	0	0
GSE78099	ZNF101	0	0	0	0	0	0.163132	0	0	0	0	0	0
GSE78099	ZNF157	0	0	0	0.303951	0.255428	0.163132	0	0	0	0	0	0
GSE78099	ZNF17	0	0	0	0	0.127714	0.163132	0	0	0	0	0	0
GSE78099	ZNF202	0	0	0	1.36778	0.255428	0.163132	2.85714	0	0	0	0	0
GSE78099	ZNF25	0	0	0	0.151976	0.255428	0.163132	0	0	0	0	0	0
GSE78099	ZNF284	0	0	0	0.151976	0	0.163132	0	0	0	0	0	0
GSE78099	ZNF302	0	0	0	0.151976	0.383142	0.163132	0	0	0	0	0	8.33333
GSE78099	ZNF30	0	0	0	0.455927	0.383142	0.163132	0	0	0	0	0	0
GSE78099	ZNF317	0	0	0	0.151976	0.383142	0.163132	0	0	0	0	0	0
GSE78099	ZNF343	0	0	0	0.151976	0.127714	0.163132	2.85714	0	0	0	0	0
GSE78099	ZNF418	0	0	0	0	0	0.163132	0	0	0	0	0	0
GSE78099	ZNF429	0	0	0	0	0.127714	0.163132	0	0	0	0	0	0
GSE78099	ZNF440	0	0	0	0.151976	0	0.163132	0	1.6129	0	0	0	0
GSE78099	ZNF445	0	0	0	2.12766	0.255428	0.163132	0	0	0	0	0	0
GSE78099	ZNF44	0	0	0	0	0	0.163132	0	0	0	0	0	0
GSE78099	ZNF547	0	0	0	0.303951	0.127714	0.163132	0	0	0	0	0	0
GSE78099	ZNF557	0	0	0	0	0	0.163132	0	0	0	0	0	0
GSE78099	ZNF671	0	0	0	0	0	0.163132	0	0	0	0	0	0
GSE78099	ZNF674	0	0	0	0.303951	0	0.163132	0	0	0	0	0	0
GSE78099	ZNF680	0	0	0	0.455927	0.127714	0.163132	0	1.6129	0	0	0	0
GSE78099	ZNF766	0	0	0	0	0.127714	0.163132	0	1.6129	0	0	0	0
GSE78099	ZNF84	0	0	0	0.151976	0	0.163132	0	0	0	0	0	0
GSE120539	ZNF446	0	0	0	0	0.127714	0.163132	0	0	0	0	0	0
GSE120539	ZNF578	0	0	0	0	0	0.163132	2.85714	0	0	0	0	0
GSE78099	KAP1	0	0	0	0	0	0	0	0	0	0	0	0
GSE78099	HKR1	0	0	0	0	0	0	0	0	0	0	0	0
GSE78099	RBAK	0	0	0	0	0	0	0	0	0	0	0	0
GSE78099	ZFP14	0	0	0	0	0	0	0	0	0	0	0	0
GSE78099	ZFP1	0	0	0	0	0	0	0	0	0	0	0	0
GSE78099	ZFP69B	0	0	0	0	0	0	0	0	0	0	0	0
GSE78099	ZFP69	0	0	0	0	0	0	0	0	0	0	0	0
GSE78099	ZFP90	0	0	0	0	0	0	0	0	0	0	0	0
GSE78099	ZIK1	0	0	0	0	0	0	0	0	0	0	0	0
GSE78099	ZIM2	0	0	0	0	0	0	0	0	0	0	0	0
GSE78099	ZKSCAN2	0	0	0	0.455927	0	0	0	0	0	0	0	0
GSE78099	ZKSCAN3	0	0	0	0	0	0	0	0	0	0	0	0
GSE78099	ZKSCAN5	0	0	0	0.151976	0.127714	0	0	0	0	0	0	0
GSE78099	ZNF100	0	0	0	0	0	0	0	0	0	0	0	0
GSE78099	ZNF100-rep2	0	0	0	0.151976	0	0	0	0	0	0	0	0
GSE78099	ZNF100-rep3	0	0	0	0	0	0	0	0	0	0	0	0
GSE78099	ZNF10	0	0	0	0	0	0	0	0	0	0	0	0
GSE78099	ZNF114	0	0	0	0	0	0	0	0	0	0	0	0
GSE78099	ZNF124	0	0	0	0	0	0	0	0	0	0	0	0
GSE78099	ZNF12	0	0	0	0.303951	0	0	0	0	0	0	0	0
GSE78099	ZNF132	0	0	0	0	0.127714	0	0	0	0	0	0	0
GSE78099	ZNF135	0	0	0	0	0	0	0	0	0	0	0	0
GSE78099	ZNF141	0	0	0	0.303951	0.383142	0	0	0	0	0	0	0
GSE78099	ZNF154	0	0	0	0	0	0	0	0	0	0	0	0
GSE78099	ZNF169	0	0	0	0	0	0	0	1.6129	0	0	0	0
GSE78099	ZNF169-rep2	0	0	0	0	0	0	0	1.6129	0	0	0	0
GSE78099	ZNF180	0	0	0	0	0	0	0	0	0	0	0	0
GSE78099	ZNF181	0	0	0	0	0	0	0	0	0	0	0	0
GSE78099	ZNF182	0	0	0	0.455927	0.255428	0	0	0	0	0	0	0
GSE78099	ZNF184	0	0	0	0	0	0	0	0	0	0	0	0
GSE78099	ZNF189	0	0	0	0.151976	0	0	0	0	0	0	0	0
GSE78099	ZNF18	0	0	0	0	0	0	0	0	0	0	0	0
GSE78099	ZNF197	0	0	0	0	0	0	0	0	0	0	0	0
GSE78099	ZNF19	0	0	0	0	0	0	0	0	0	0	0	0
GSE78099	ZNF205	0	0	0	0	0	0	0	0	0	0	0	0
GSE78099	ZNF211	0	0	0	0	0	0	0	0	0	0	0	0
GSE78099	ZNF211-rep2	0	0	0	0	0	0	0	0	0	0	0	0
GSE78099	ZNF212	0	0	0	0	0	0	0	0	0	0	0	0
GSE78099	ZNF214	0	0	0	0	0	0	0	0	0	0	0	0
GSE78099	ZNF222	0	0	0	0	0	0	0	0	0	0	0	0
GSE78099	ZNF223	0	0	0	0	0	0	0	0	0	0	0	0
GSE78099	ZNF224	0	0	0	0	0	0	0	0	0	0	0	0
GSE78099	ZNF225	0	0	0	0	0	0	0	0	0	0	0	0
GSE78099	ZNF235	0	0	0	0	0	0	0	0	0	0	0	0
GSE78099	ZNF248	0	0	0	0	0	0	0	0	0	0	0	0
GSE78099	ZNF254	0	0	0	0	0	0	0	0	0	0	0	0
GSE78099	ZNF257	0	0	0	0.455927	0.127714	0	0	0	0	0	0	0
GSE78099	ZNF263	0	0	0	0	0.127714	0	0	0	0	0	0	0
GSE78099	ZNF264	0	0	0	0	0	0	0	0	0	0	0	0
GSE78099	ZNF266	0	0	0	0.151976	0.127714	0	0	0	0	0	0	0
GSE78099	ZNF267	0	0	0	0	0	0	0	0	0	0	0	0
GSE78099	ZNF26	0	0	0	0	0	0	0	0	0	0	0	0
GSE78099	ZNF273	0	0	0	1.21581	0.510856	0	0	0	0	0	0	0
GSE78099	ZNF274	0	0	0	0	0	0	0	0	0	0	0	0
GSE78099	ZNF282	0	0	0	0.303951	0	0	0	0	0	0	0	0
GSE78099	ZNF282-rep2	0	0	0	0.303951	0	0	0	0	0	0	0	0
GSE78099	ZNF283	0	0	0	0	0.127714	0	0	0	0	0	0	0
GSE78099	ZNF285	0	0	0	0	0.127714	0	0	1.6129	0	0	0	0
GSE78099	ZNF287	0	0	0	0	0	0	0	0	0	0	0	0
GSE78099	ZNF300	0	0	0	0	0	0	0	0	0	0	0	0
GSE78099	ZNF304	0	0	0	0	0	0	0	0	0	0	0	0
GSE78099	ZNF311	0	0	0	0	0	0	0	0	0	0	0	0
GSE78099	ZNF320	0	0	0	0.607903	0.127714	0	0	0	0	0	0	0
GSE78099	ZNF324B	0	0	0	0	0	0	0	0	0	0	0	0
GSE78099	ZNF324	0	0	0	0	0	0	0	0	0	0	0	0
GSE78099	ZNF331	0	0	0	0	0	0	0	0	0	0	0	0
GSE78099	ZNF333	0	0	0	0.607903	0	0	0	0	0	0	0	0
GSE78099	ZNF334	0	0	0	0.151976	0	0	0	0	0	0	0	0
GSE78099	ZNF337	0	0	0	0	0.127714	0	0	0	0	0	0	0
GSE78099	ZNF33A	0	0	0	0.303951	0	0	0	1.6129	0	0	0	0
GSE78099	ZNF33A-rep2	0	0	0	0.151976	0	0	0	0	0	0	0	0
GSE78099	ZNF33B	0	0	0	0	0	0	0	0	0	0	0	0
GSE78099	ZNF354A	0	0	0	0	0	0	0	0	0	0	0	0
GSE78099	ZNF354B	0	0	0	0	0	0	0	0	0	0	0	0
GSE78099	ZNF383	0	0	0	0	0	0	0	0	0	0	0	0
GSE78099	ZNF398	0	0	0	0	0	0	0	0	0	0	0	0
GSE78099	ZNF3	0	0	0	0	0	0	0	0	0	0	0	0
GSE78099	ZNF419	0	0	0	0	0	0	0	0	0	0	0	0
GSE78099	ZNF419-rep2	0	0	0	0	0	0	0	0	0	0	0	0
GSE78099	ZNF425	0	0	0	0.303951	0	0	0	1.6129	0	0	0	0
GSE78099	ZNF430	0	0	0	0	0	0	0	0	0	0	0	0
GSE78099	ZNF431	0	0	0	0	0	0	0	0	0	0	0	0
GSE78099	ZNF432	0	0	0	0	0	0	0	0	0	0	0	0
GSE78099	ZNF433	0	0	0	0.151976	0	0	0	0	0	0	0	0
GSE78099	ZNF439	0	0	0	0	0	0	0	0	0	0	0	0
GSE78099	ZNF441	0	0	0	0.303951	0.127714	0	0	0	0	0	0	0
GSE78099	ZNF442	0	0	0	0	0	0	0	0	0	0	0	0
GSE78099	ZNF443	0	0	0	0	0	0	0	0	0	0	0	0
GSE78099	ZNF454	0	0	0	0	0	0	0	0	0	0	0	0
GSE78099	ZNF45	0	0	0	0	0	0	0	0	0	0	0	0
GSE78099	ZNF460	0	0	0	0	0	0	0	0	0	0	0	0
GSE78099	ZNF480	0	0	0	0	0	0	0	0	0	5	0	0
GSE78099	ZNF483	0	0	0	0	0	0	0	0	0	0	0	0
GSE78099	ZNF484	0	0	0	0	0	0	0	0	0	0	0	0
GSE78099	ZNF485	0	0	0	0	0	0	0	0	0	0	0	0
GSE78099	ZNF486	0	0	0	0	0	0	0	0	0	0	0	0
GSE78099	ZNF487P	0	0	0	0	0	0	0	0	0	0	0	0
GSE78099	ZNF492	0	0	0	0	0	0	0	0	0	0	0	0
GSE78099	ZNF496	0	0	0	0	0	0	0	0	0	0	0	0
GSE78099	ZNF525	0	0	0	0	0	0	0	0	0	0	0	0
GSE78099	ZNF527	0	0	0	0	0	0	0	0	0	0	0	0
GSE78099	ZNF528	0	0	0	0	0	0	0	0	0	0	0	0
GSE78099	ZNF529	0	0	0	0	0	0	0	0	0	0	0	0
GSE78099	ZNF530	0	0	0	0	0.127714	0	0	0	0	0	0	0
GSE78099	ZNF540	0	0	0	0.151976	0	0	0	0	0	0	0	0
GSE78099	ZNF543	0	0	0	0.151976	0.127714	0	0	0	0	0	0	0
GSE78099	ZNF548	0	0	0	0	0	0	0	0	0	0	0	0
GSE78099	ZNF549	0	0	0	0	0.127714	0	0	0	0	0	0	0
GSE78099	ZNF549-rep2	0	0	0	0	0	0	0	0	0	0	0	0
GSE78099	ZNF550	0	0	0	0	0	0	0	0	0	0	0	0
GSE78099	ZNF552	0	0	0	0	0	0	0	0	0	0	0	0
GSE78099	ZNF555	0	0	0	0	0	0	0	0	0	0	0	0
GSE78099	ZNF561	0	0	0	0.151976	0	0	0	0	0	0	0	0
GSE78099	ZNF562	0	0	0	0	0	0	0	0	0	0	0	0
GSE78099	ZNF564	0	0	0	0	0	0	0	0	0	0	0	0
GSE78099	ZNF565	0	0	0	0.151976	0	0	0	0	0	0	0	0
GSE78099	ZNF566	0	0	0	0	0	0	0	0	0	0	0	0
GSE78099	ZNF567	0	0	0	0.151976	0	0	5.71429	0	0	0	0	0
GSE78099	ZNF570	0	0	0	0	0	0	0	0	0	0	0	0
GSE78099	ZNF571	0	0	0	0	0.127714	0	0	0	0	0	0	0
GSE78099	ZNF573	0	0	0	0.151976	0	0	0	0	0	0	0	0
GSE78099	ZNF582	0	0	0	0	0	0	0	0	0	0	0	0
GSE78099	ZNF584	0	0	0	0	0	0	0	0	0	0	0	0
GSE78099	ZNF585A	0	0	7.14286	0	0	0	0	0	0	0	0	0
GSE78099	ZNF587	0	0	0	0	0	0	0	0	0	0	0	0
GSE78099	ZNF610	0	0	0	0	0.255428	0	0	0	0	0	0	0
GSE78099	ZNF611	0	0	0	0.303951	0.127714	0	0	0	0	0	0	0
GSE78099	ZNF613	0	0	0	0	0	0	0	0	0	0	0	0
GSE78099	ZNF614	0	0	0	0	0	0	0	0	0	0	0	0
GSE78099	ZNF615	0	0	0	0	0	0	0	0	0	0	0	0
GSE78099	ZNF616	0	0	0	0	0	0	0	0	0	0	0	0
GSE78099	ZNF619	0	0	0	0	0	0	0	0	0	0	0	0
GSE78099	ZNF620	0	0	0	0	0	0	0	0	0	0	0	0
GSE78099	ZNF621	0	0	0	0	0	0	0	0	0	0	0	0
GSE78099	ZNF626	0	0	0	0	0	0	0	0	0	0	0	0
GSE78099	ZNF627	0	0	0	0	0	0	0	0	0	0	0	0
GSE78099	ZNF662	0	0	0	0	0	0	0	0	0	0	0	0
GSE78099	ZNF667	0	0	0	0	0	0	0	0	0	0	0	0
GSE78099	ZNF675	0	0	0	0.455927	0	0	0	0	0	0	0	0
GSE78099	ZNF680-rep2	0	0	0	0.455927	0	0	0	1.6129	0	0	0	0
GSE78099	ZNF681	0	0	0	0	0	0	0	0	0	0	0	0
GSE78099	ZNF684	0	0	0	0	0	0	0	0	0	0	0	0
GSE78099	ZNF695	0	0	0	0.455927	0.255428	0	0	0	0	0	0	0
GSE78099	ZNF69	0	0	0	0	0	0	0	0	0	0	0	0
GSE78099	ZNF701	0	0	0	0	0	0	0	0	0	0	0	0
GSE78099	ZNF705G	0	0	0	0	0	0	0	0	0	0	0	0
GSE78099	ZNF708	0	0	0	0	0	0	0	0	0	0	0	0
GSE78099	ZNF714	0	0	0	0	0	0	0	0	0	0	0	0
GSE78099	ZNF716	0	0	0	0	0	0	0	0	0	0	0	0
GSE78099	ZNF730	0	0	0	0.455927	0	0	0	0	0	0	0	0
GSE78099	ZNF737	0	0	0	0	0	0	0	0	0	0	0	0
GSE78099	ZNF749	0	0	0	0	0	0	0	0	0	0	0	0
GSE78099	ZNF74	0	0	0	0	0	0	0	0	0	0	0	0
GSE78099	ZNF75D	0	0	0	0.303951	0.510856	0	0	0	0	0	0	0
GSE78099	ZNF75D-rep2	0	0	0	0.303951	0.63857	0	0	0	0	0	0	0
GSE78099	ZNF764	0	0	0	0	0	0	0	0	0	0	0	0
GSE78099	ZNF765	0	0	0	0.151976	0	0	0	0	0	0	0	0
GSE78099	ZNF776	0	0	0	0	0	0	0	0	0	0	0	0
GSE78099	ZNF777	0	0	0	0	0	0	0	0	0	0	0	0
GSE78099	ZNF778	0	0	0	0.151976	0	0	0	0	0	0	0	0
GSE78099	ZNF77	0	0	0	0	0	0	0	0	0	0	0	0
GSE78099	ZNF780A	0	0	0	0	0	0	0	0	0	0	0	0
GSE78099	ZNF782	0	0	0	0	0	0	0	0	0	0	0	0
GSE78099	ZNF783	0	0	0	0	0	0	0	0	0	0	0	0
GSE78099	ZNF785	0	0	0	0	0	0	0	0	0	0	0	0
GSE78099	ZNF786	0	0	0	0.911854	0.63857	0	2.85714	1.6129	0	0	0	0
GSE78099	ZNF789	0	0	0	0	0	0	0	0	0	0	0	0
GSE78099	ZNF790	0	0	0	0	0	0	0	0	0	0	0	0
GSE78099	ZNF791	0	0	0	0	0	0	0	0	0	0	0	0
GSE78099	ZNF792	0	0	0	0	0	0	0	0	0	0	0	0
GSE78099	ZNF799	0	0	0	0	0	0	0	0	0	0	0	0
GSE78099	ZNF79	0	0	0	0	0	0	0	0	0	0	0	0
GSE78099	ZNF7	0	0	0	0	0	0	0	0	0	0	0	0
GSE78099	ZNF805	0	0	0	0	0	0	0	0	0	0	0	0
GSE78099	ZNF808	0	0	0	0	0	0	0	0	0	0	0	0
GSE78099	ZNF816	0	0	0	0	0	0	0	0	0	0	0	0
GSE78099	ZNF81	0	0	0	0	0	0	0	0	0	0	0	0
GSE78099	ZNF823	0	0	0	0	0.127714	0	0	0	0	0	0	0
GSE78099	ZNF846	0	0	0	0.151976	0	0	0	0	0	0	0	0
GSE78099	ZNF85	0	0	0	0.151976	0	0	0	0	0	0	0	0
GSE78099	ZNF860	0	0	0	0	0	0	0	0	0	0	0	0
GSE78099	ZNF879	0	0	0	0	0	0	0	0	0	0	0	0
GSE78099	ZNF880	0	0	0	0	0	0	0	0	0	0	0	0
GSE78099	ZNF891	0	0	0	0	0	0	0	0	0	0	0	0
GSE78099	ZNF8	0	0	0	0	0	0	0	0	0	0	0	0
GSE78099	ZNF93	0	0	0	0.151976	0	0	0	0	0	0	0	0
GSE120539	ZFP28	0	0	0	0	0	0	0	0	0	0	0	0
GSE120539	ZKSCAN4	0	0	0	0	0	0	0	0	0	0	0	0
GSE120539	ZKSCAN7	0	0	0	0.151976	0.255428	0	0	0	0	0	0	0
GSE120539	ZKSCAN8	0	0	0	0	0	0	0	0	0	0	0	0
GSE120539	ZNF160	0	0	0	0.151976	0.127714	0	0	0	0	0	0	0
GSE120539	ZNF20	0	0	0	0	0	0	0	0	0	0	0	0
GSE120539	ZNF213	0	0	0	0	0	0	0	0	0	0	0	0
GSE120539	ZNF215	0	0	0	0	0	0	0	0	0	0	0	0
GSE120539	ZNF256	0	0	0	0	0	0	0	0	0	0	0	0
GSE120539	ZNF416	0	0	0	0.455927	0	0	0	0	0	0	0	0
GSE120539	ZNF597	0	0	0	0	0	0	0	0	0	0	0	0
GSE120539	ZNF724P	0	0	0	0	0	0	0	0	0	0	0	0
GSE120539	ZNF729	0	0	0	0	0	0	0	0	0	0	0	0
GSE120539	ZNF746	0	0	0	0	0	0	0	0	0	0	0	0

## Sheet: Sheet5
Figure3-figure supplement 2-source data 2: Raw. Bar graph of fraction of LTR12C copies having ZNF850 motif.
		Low	Medium	High
	Containing ZNF850 motif	12	80	194
	Total	658	783	613
	Fraction	1.82371	10.2171	31.6476
