# Supplementary material for: Potential role of KRAB-ZFP binding and transcriptional states on DNA methylation of retroelements in human male germ cells
Source: eLife. 2022 Mar 22;11:e76822. doi: 10.7554/eLife.76822 (PMC8967385; doi:10.7554/eLife.76822)
Supplement: Figure 4—source data 1. [file elife-76822-fig4-data1.xlsx]

## Sheet: Sheet1
Figure4-source data 1: Raw. Scatter plots showing DNA methylation levels of each retroelement copy in male hPGCs at 19 weeks of gestation and sperm.
chr	start	end	group	humanSperm_Hammoud_donor1_merge	humanSperm_Hammoud_donor2_merge	PGC_19W_embryo1_M			chr	start	end	group	humanSperm_Hammoud_donor1_merge	humanSperm_Hammoud_donor2_merge	PGC_19W_embryo1_M			chr	start	end	group	humanSperm_Hammoud_donor1_merge	humanSperm_Hammoud_donor2_merge	PGC_19W_embryo1_M
chr1	143125606	143131754	L1PA2:LINE:L1:-	0.495167	0.631911	0.255058			chr1	91356742	91358137	SVA_D:Other:Other:-	0.209465	0.0430497	0.245238			chr1	10485712	10486981	LTR12C:LTR:ERV1:-	0.91932	0.877861	0.134815
chr1	185856425	185862466	L1PA2:LINE:L1:-	0.885941	0.812736	0.486667			chr1	6364453	6366296	SVA_D:Other:Other:-	0.756701	0.124711	0.105936			chr1	109182514	109184050	LTR12C:LTR:ERV1:-	0.346331	0.296034	0.0128205
chr1	25833076	25839210	L1PA2:LINE:L1:+	0.583113	0.465553	0.126042			chr1	6774578	6776390	SVA_D:Other:Other:-	0.897553	0.340967	0.0551511			chr1	952549	954256	LTR12C:LTR:ERV1:-	0.428303	0.439473	0.12441
chr1	50340840	50346847	L1PA2:LINE:L1:-	0.818083	0.790712	0.58208			chr1	7660545	7662062	SVA_D:Other:Other:-	0.798223	0.477283	0.607465			chr1	1041993	1043425	LTR12C:LTR:ERV1:+	0.925151	0.774579	0.626446
chr1	58838843	58844878	L1PA2:LINE:L1:-	0.782738	0.786023	0.123077			chr1	10088443	10089824	SVA_D:Other:Other:+	0.927458	0.81245	0.117399			chr1	2729663	2731052	LTR12C:LTR:ERV1:+	0.623147	0.444025	0.624154
chr1	60113419	60119451	L1PA2:LINE:L1:-	0.878034	0.906451	0.146296			chr1	13983865	13985572	SVA_D:Other:Other:+	0.509745	0.0518284	0.526554			chr1	11668625	11669977	LTR12C:LTR:ERV1:+	0.262723	0.119975	0.120086
chr1	69389169	69395194	L1PA2:LINE:L1:+	0.924792	0.89823	0.550808			chr1	23583263	23584911	SVA_D:Other:Other:+	0.527066	0.0942007	0.0886393			chr1	14308736	14310222	LTR12C:LTR:ERV1:-	0.531775	0.355294	0.42379
chr1	72353886	72359918	L1PA2:LINE:L1:+	0.885483	0.856659	0.268831			chr1	23829728	23831478	SVA_D:Other:Other:+	0.716765	0.104613	0.110749			chr1	14746023	14747581	LTR12C:LTR:ERV1:-	0.130621	0.012477	0.789423
chr1	80404094	80410104	L1PA2:LINE:L1:-	0.808751	0.82287	0.675916			chr1	24014644	24016257	SVA_D:Other:Other:+	0.264921	0.0424982	0.0906797			chr1	20310193	20311509	LTR12C:LTR:ERV1:-	0.187937	0.066071	0.264739
chr1	97069942	97075956	L1PA2:LINE:L1:+	0.888962	0.911284	0.753997			chr1	24178934	24180547	SVA_D:Other:Other:+	0.884325	0.874699	0.365556			chr1	25047834	25049237	LTR12C:LTR:ERV1:+	0.599821	0.297331	0.314246
chr1	103393658	103399669	L1PA2:LINE:L1:-	0.848398	0.76173	0.0458333			chr1	24261448	24262987	SVA_D:Other:Other:+	0.941598	0.432093	0.074388			chr1	29456756	29458154	LTR12C:LTR:ERV1:-	0.423562	0.403594	0.239337
chr1	118823510	118829528	L1PA2:LINE:L1:+	0.923239	0.898268	0.401143			chr1	26921935	26924007	SVA_D:Other:Other:+	0.661474	0.0208118	0.0285714			chr1	36662383	36663469	LTR12C:LTR:ERV1:+	0.942552	0.933466	0.31759
chr1	146894945	146900972	L1PA2:LINE:L1:+	0.753549	0.821417	0.330119			chr1	27129382	27131339	SVA_D:Other:Other:-	0.512802	0.0915295	0.0142857			chr1	37983669	37985160	LTR12C:LTR:ERV1:+	0.0898386	0.0637452	0.0927212
chr1	149052759	149058793	L1PA2:LINE:L1:-	0.465616	0.47201	0.15619			chr1	27614841	27616533	SVA_D:Other:Other:-	0.853379	0.310367	0.0352608			chr1	40853343	40854827	LTR12C:LTR:ERV1:+	0.101787	0.0626809	0.695014
chr1	158922530	158928559	L1PA2:LINE:L1:+	0.900066	0.760404	0.530714			chr1	31648616	31650508	SVA_D:Other:Other:+	0.197103	0.023378	0.117512			chr1	41023108	41025007	LTR12C:LTR:ERV1:-	0.590582	0.159072	0.114183
chr1	168318100	168324117	L1PA2:LINE:L1:-	0.890319	0.867266	0.155944			chr1	37545338	37547744	SVA_D:Other:Other:+	0.139368	0.0773434	0.158138			chr1	43381779	43383215	LTR12C:LTR:ERV1:-	0.76596	0.595738	0.595155
chr1	174346929	174352953	L1PA2:LINE:L1:-	0.900836	0.834657	0.381534			chr1	39112439	39114000	SVA_D:Other:Other:+	0.470783	0.141088	0.445392			chr1	43572015	43573748	LTR12C:LTR:ERV1:-	0.955947	0.867963	0.829209
chr1	174812364	174818381	L1PA2:LINE:L1:-	0.920974	0.88	0.0625			chr1	40378172	40379737	SVA_D:Other:Other:-	0.655839	0.133371	0.0701754			chr1	50006829	50008224	LTR12C:LTR:ERV1:+	0.929325	0.891085	0.748529
chr1	175971490	175977503	L1PA2:LINE:L1:-	0.915247	0.863696	0.577143			chr1	43966926	43968647	SVA_D:Other:Other:+	0.18522	0.0372816	0.0273148			chr1	52312121	52313603	LTR12C:LTR:ERV1:-	0.219672	0.0474301	0.764196
chr1	177603062	177609081	L1PA2:LINE:L1:+	0.814708	0.73745	0.136177			chr1	45341422	45342884	SVA_D:Other:Other:+	0.900766	0.340398	0.110012			chr1	54468889	54470460	LTR12C:LTR:ERV1:-	0.655606	0.590014	0.803036
chr1	188721347	188727391	L1PA2:LINE:L1:-	0.798235	0.753988	0.0965035			chr1	48944380	48945924	SVA_D:Other:Other:+	0.525027	0.0405737	0.196296			chr1	57808256	57809644	LTR12C:LTR:ERV1:-	0.0503924	0.07356	0.741215
chr1	192469714	192475742	L1PA2:LINE:L1:+	0.850685	0.891256	0.597024			chr1	52646719	52648436	SVA_D:Other:Other:+	0.297014	0.158708	0.213955			chr1	59088920	59090506	LTR12C:LTR:ERV1:+	0.441069	0.3986	0.389218
chr1	207903811	207909840	L1PA2:LINE:L1:+	0.835703	0.823821	0.360435			chr1	53334917	53336580	SVA_D:Other:Other:-	0.920722	0.762648	0.133435			chr1	59937619	59939164	LTR12C:LTR:ERV1:+	0.241956	0.2974	0.500335
chr1	223568876	223574899	L1PA2:LINE:L1:-	0.786056	0.712384	0.106667			chr1	76577138	76579055	SVA_D:Other:Other:-	0.25791	0.0592427	0.0105909			chr1	60434473	60435901	LTR12C:LTR:ERV1:-	0.118378	0.0928769	0.0823529
chr2	40235740	40241759	L1PA2:LINE:L1:-	0.844413	0.846069	0.405254			chr1	87364469	87366320	SVA_D:Other:Other:-	0.650286	0.0688357	0.145342			chr1	63135377	63136926	LTR12C:LTR:ERV1:+	0.851041	0.904038	0.28698
chr2	4690558	4696555	L1PA2:LINE:L1:+	0.891116	0.900095	0.0514286			chr1	96934652	96936203	SVA_D:Other:Other:-	0.407603	0.115678	0.154688			chr1	63218927	63220495	LTR12C:LTR:ERV1:+	0.928045	0.881392	0.737721
chr2	14988188	14994202	L1PA2:LINE:L1:+	0.825382	0.740274	0.491978			chr1	97227294	97229186	SVA_D:Other:Other:-	0.916515	0.722869	0.38445			chr1	63227010	63228332	LTR12C:LTR:ERV1:+	0.898304	0.868275	0.427228
chr2	31127064	31133089	L1PA2:LINE:L1:+	0.915176	0.877485	0.351173			chr1	98977339	98979223	SVA_D:Other:Other:-	0.468817	0.0141937	0.453671			chr1	69283218	69284650	LTR12C:LTR:ERV1:+	0.0779867	0	0.00694444
chr2	40459740	40465767	L1PA2:LINE:L1:-	0.751606	0.737326	0.428333			chr1	100288477	100289983	SVA_D:Other:Other:+	0.859571	0.283891	0.067619			chr1	74712735	74714149	LTR12C:LTR:ERV1:-	0.87045	0.889595	0.609726
chr2	57645845	57651854	L1PA2:LINE:L1:+	0.85865	0.742034	0.25671			chr1	109078097	109079480	SVA_D:Other:Other:-	0.747642	0.0505544	0.182083			chr1	74718170	74719596	LTR12C:LTR:ERV1:-	0.318239	0.505225	0.431951
chr2	63062613	63068633	L1PA2:LINE:L1:+	0.739188	0.6904	0.571118			chr1	112149660	112151498	SVA_D:Other:Other:-	0.162266	0.0363101	0.246984			chr1	75416908	75418296	LTR12C:LTR:ERV1:-	0.566322	0.589032	0.44783
chr2	66404302	66410334	L1PA2:LINE:L1:+	0.791266	0.785604	0.480556			chr1	143542208	143543631	SVA_D:Other:Other:+	0.390567	0.235809	0.402588			chr1	80026244	80027766	LTR12C:LTR:ERV1:-	0.852901	0.851989	0.68206
chr2	77980898	77986904	L1PA2:LINE:L1:+	0.731719	0.630755	0.419066			chr1	145667058	145669064	SVA_D:Other:Other:+	0.572044	0.0290604	0.01			chr1	81643468	81644862	LTR12C:LTR:ERV1:-	0.0611698	0.0488643	0.234977
chr2	83315928	83321955	L1PA2:LINE:L1:+	0.812398	0.768098	0.0799451			chr1	146704073	146705757	SVA_D:Other:Other:+	0.882252	0.743288	0.65803			chr1	83241602	83243030	LTR12C:LTR:ERV1:-	0.0692011	0.0509136	0.0849327
chr2	117913610	117919627	L1PA2:LINE:L1:+	0.812893	0.721457	0.46578			chr1	147420873	147423219	SVA_D:Other:Other:-	0.909373	0.458511	0.116731			chr1	86576068	86577737	LTR12C:LTR:ERV1:+	0.417338	0.403582	0.153188
chr2	118894576	118900596	L1PA2:LINE:L1:-	0.332077	0.347499	0.0416667			chr1	149196673	149198801	SVA_D:Other:Other:+	0.223751	0.149437	0.0722261			chr1	86988811	86990052	LTR12C:LTR:ERV1:-	0.187372	0.0990465	0.591884
chr2	124897352	124903384	L1PA2:LINE:L1:+	0.459367	0.350701	0.304029			chr1	152228083	152229658	SVA_D:Other:Other:-	0.670156	0.70492	0.131425			chr1	88101002	88102474	LTR12C:LTR:ERV1:-	0.926883	0.910569	0.844144
chr2	125113883	125119911	L1PA2:LINE:L1:-	0.831586	0.817322	0.531463			chr1	152443879	152445283	SVA_D:Other:Other:-	0.93277	0.686573	0.289706			chr1	89592701	89594292	LTR12C:LTR:ERV1:-	0.3699	0.328429	0.165873
chr2	129616558	129622590	L1PA2:LINE:L1:-	0.848431	0.653413	0.0151515			chr1	153554814	153556370	SVA_D:Other:Other:+	0.92111	0.208936	0.0178571			chr1	89738135	89739573	LTR12C:LTR:ERV1:-	0.223892	0.089422	0.310065
chr2	134222578	134228609	L1PA2:LINE:L1:-	0.851942	0.851279	0.412431			chr1	154259375	154260904	SVA_D:Other:Other:+	0.72397	0.133081	0.02			chr1	89767572	89769016	LTR12C:LTR:ERV1:-	0.668306	0.465278	0.811109
chr2	138150730	138156760	L1PA2:LINE:L1:-	0.896324	0.897219	0.682738			chr1	156297052	156298664	SVA_D:Other:Other:+	0.919644	0.906397	0.0211538			chr1	90449445	90450742	LTR12C:LTR:ERV1:-	0.257914	0.303167	0.148136
chr2	144419131	144425156	L1PA2:LINE:L1:+	0.880861	0.87608	0.718615			chr1	161392048	161394106	SVA_D:Other:Other:+	0.21187	0.04196	0.0764712			chr1	93635650	93636972	LTR12C:LTR:ERV1:+	0.654279	0.369504	0.119429
chr2	145655165	145661170	L1PA2:LINE:L1:-	0.826493	0.871208	0.170635			chr1	173581711	173583401	SVA_D:Other:Other:+	0.489768	0.132626	0.454217			chr1	95556763	95558356	LTR12C:LTR:ERV1:+	0.291032	0.179795	0.0435626
chr2	148484573	148490597	L1PA2:LINE:L1:+	0.934863	0.899375	0.430303			chr1	176026480	176027908	SVA_D:Other:Other:+	0.884078	0.62445	0.0252778			chr1	96134330	96135748	LTR12C:LTR:ERV1:-	0.229232	0.172894	0.481772
chr2	152555382	152561403	L1PA2:LINE:L1:-	0.893531	0.776205	0.476667			chr1	179008866	179010815	SVA_D:Other:Other:-	0.932141	0.863635	0.0420478			chr1	96688935	96690462	LTR12C:LTR:ERV1:-	0.42875	0.288974	0.23837
chr2	154575960	154581977	L1PA2:LINE:L1:+	0.927611	0.883938	0.440448			chr1	179103839	179105838	SVA_D:Other:Other:+	0.917075	0.835712	0.0353175			chr1	102699500	102700886	LTR12C:LTR:ERV1:-	0.579704	0.470934	0.789079
chr2	156822399	156828427	L1PA2:LINE:L1:+	0.662284	0.65324	0.0204082			chr1	179387124	179388800	SVA_D:Other:Other:-	0.748345	0.385916	0.273935			chr1	103124543	103126133	LTR12C:LTR:ERV1:-	0.122802	0.0477283	0.25
chr2	186450614	186456635	L1PA2:LINE:L1:-	0.851988	0.826426	0.094709			chr1	182408414	182409822	SVA_D:Other:Other:-	0.754288	0.140683	0.491547			chr1	103319159	103320608	LTR12C:LTR:ERV1:+	0.259202	0.24755	0.1743
chr2	197386208	197392224	L1PA2:LINE:L1:-	0.858369	0.82054	0.299517			chr1	182709688	182711920	SVA_D:Other:Other:-	0.386762	0.0786878	0.162257			chr1	104714783	104716208	LTR12C:LTR:ERV1:+	0.572147	0.292747	0.465893
chr2	198552256	198558285	L1PA2:LINE:L1:-	0.905985	0.878193	0.123077			chr1	197374171	197375722	SVA_D:Other:Other:+	0.1713	0.0139731	0.230635			chr1	104758964	104760632	LTR12C:LTR:ERV1:-	0.900347	0.901894	0.575345
chr2	209993253	209999306	L1PA2:LINE:L1:+	0.882495	0.677706	0.639394			chr1	202159959	202161610	SVA_D:Other:Other:-	0.893612	0.862782	0.0111111			chr1	106172758	106174422	LTR12C:LTR:ERV1:-	0.226651	0.222252	0.103788
chr2	210610892	210616932	L1PA2:LINE:L1:-	0.91631	0.902393	0.416567			chr1	202420320	202421730	SVA_D:Other:Other:-	0.918018	0.826738	0.224185			chr1	107587193	107588793	LTR12C:LTR:ERV1:+	0.315566	0.0764819	0.157071
chr2	220796539	220802559	L1PA2:LINE:L1:+	0.801523	0.696351	0.664827			chr1	206276043	206278006	SVA_D:Other:Other:-	0.573857	0.0762277	0.064881			chr1	109209915	109211344	LTR12C:LTR:ERV1:+	0.881005	0.396804	0.154715
chr2	229432973	229438997	L1PA2:LINE:L1:+	0.781457	0.660895	0.307196			chr1	209301782	209303557	SVA_D:Other:Other:+	0.146504	0.131284	0.284318			chr1	110938040	110939526	LTR12C:LTR:ERV1:-	0.252741	0.200626	0.673127
chr3	155186851	155192877	L1PA2:LINE:L1:+	0.898462	0.900082	0.466837			chr1	219718311	219720226	SVA_D:Other:Other:+	0.132854	0.0267711	0.197875			chr1	113396310	113397706	LTR12C:LTR:ERV1:-	0.539312	0.505767	0.0277778
chr3	111275050	111281081	L1PA2:LINE:L1:-	0.803485	0.755717	0.194372			chr1	220639028	220640909	SVA_D:Other:Other:-	0.846076	0.492045	0.78739			chr1	113437147	113438578	LTR12C:LTR:ERV1:+	0.893394	0.572973	0.758528
chr3	1429244	1435255	L1PA2:LINE:L1:+	0.788581	0.727215	0.240171			chr1	226301999	226303681	SVA_D:Other:Other:-	0.898868	0.731212	0			chr1	116688191	116689742	LTR12C:LTR:ERV1:-	0.361299	0.229954	0.312412
chr3	19138860	19144839	L1PA2:LINE:L1:-	0.759795	0.696222	0.22619			chr1	227319816	227321658	SVA_D:Other:Other:+	0.928738	0.603086	0.137671			chr1	116839822	116841165	LTR12C:LTR:ERV1:-	0.69763	0.690375	0.634149
chr3	19412102	19418117	L1PA2:LINE:L1:-	0.879737	0.894429	0.428287			chr1	227897702	227899534	SVA_D:Other:Other:-	0.883218	0.50585	0.444512			chr1	119713986	119715334	LTR12C:LTR:ERV1:+	0.900697	0.877193	0.818362
chr3	21291216	21297247	L1PA2:LINE:L1:-	0.841813	0.806906	0.79			chr1	235471755	235473508	SVA_D:Other:Other:+	0.919706	0.857719	0.117245			chr1	119721507	119723014	LTR12C:LTR:ERV1:+	0.922229	0.867868	0.653332
chr3	22024631	22030669	L1PA2:LINE:L1:-	0.889213	0.822167	0.212574			chr1	237832175	237833638	SVA_D:Other:Other:-	0.900607	0.65743	0.178233			chr1	144016769	144018639	LTR12C:LTR:ERV1:-	0.72503	0.679491	0.235664
chr3	24130949	24136982	L1PA2:LINE:L1:-	0.886786	0.846331	0.163636			chr1	245937967	245939032	SVA_D:Other:Other:+	0.846607	0.199933	0			chr1	147151968	147153457	LTR12C:LTR:ERV1:-	0.525163	0.221404	0.717005
chr3	35860145	35866184	L1PA2:LINE:L1:-	0.852673	0.857856	0.595238			chr1	246525726	246527240	SVA_D:Other:Other:+	0.921238	0.653026	0.147128			chr1	149069575	149070997	LTR12C:LTR:ERV1:+	0.395032	0.403629	0.497718
chr3	55170356	55176378	L1PA2:LINE:L1:+	0.786883	0.77407	0.595654			chr1	247383255	247384559	SVA_D:Other:Other:+	0.905346	0.259107	0.063752			chr1	151878428	151879859	LTR12C:LTR:ERV1:+	0.84735	0.846313	0.612703
chr3	58802004	58808030	L1PA2:LINE:L1:+	0.886089	0.916953	0.433333			chr1	248839625	248840880	SVA_D:Other:Other:+	0.628876	0.0922006	0.644444			chr1	153494078	153495464	LTR12C:LTR:ERV1:+	0.15703	0.0980738	0.0730442
chr3	75322612	75328621	L1PA2:LINE:L1:-	0.847797	0.957259	0.662755			chr2	3616115	3617630	SVA_D:Other:Other:-	0.969462	0.853044	0.0255465			chr1	154503779	154505114	LTR12C:LTR:ERV1:-	0.927446	0.886597	0.727293
chr3	89918194	89924219	L1PA2:LINE:L1:-	0.627675	0.560148	0.561111			chr2	25856056	25857939	SVA_D:Other:Other:+	0.819518	0.13409	0.0340064			chr1	154643043	154644474	LTR12C:LTR:ERV1:+	0.482322	0.302552	0.232832
chr3	90006983	90013005	L1PA2:LINE:L1:+	0.718437	0.505183	0.432385			chr2	25945507	25947023	SVA_D:Other:Other:-	0.646125	0.133173	0.134524			chr1	154650330	154651788	LTR12C:LTR:ERV1:+	0.860426	0.892398	0.734493
chr3	90431620	90437601	L1PA2:LINE:L1:-	0.655934	0.650565	0.631746			chr2	26132611	26134456	SVA_D:Other:Other:-	0.54072	0.0844991	0.137429			chr1	157415227	157416636	LTR12C:LTR:ERV1:-	0.160633	0.0742128	0.104545
chr3	118720317	118726337	L1PA2:LINE:L1:-	0.6595	0.702808	0.137879			chr2	26592737	26594781	SVA_D:Other:Other:-	0.543202	0.0505612	0.110231			chr1	158317912	158319335	LTR12C:LTR:ERV1:-	0.559781	0.341453	0.118452
chr3	126050447	126056429	L1PA2:LINE:L1:+	0.75432	0.796884	0.449915			chr2	32518145	32520112	SVA_D:Other:Other:-	0.918493	0.526847	0.183471			chr1	158342920	158344508	LTR12C:LTR:ERV1:-	0.569164	0.434187	0.12963
chr3	132479500	132485496	L1PA2:LINE:L1:-	0.533284	0.506382	0.212202			chr2	32979211	32980708	SVA_D:Other:Other:-	0.716861	0.121523	0.261429			chr1	159463441	159464965	LTR12C:LTR:ERV1:-	0.426404	0.28014	0.306667
chr3	137352556	137358574	L1PA2:LINE:L1:-	0.866836	0.720832	0.025641			chr2	36406438	36408320	SVA_D:Other:Other:+	0.732669	0.248677	0.337464			chr1	162402761	162404238	LTR12C:LTR:ERV1:+	0.215821	0.0787981	0.0111842
chr3	141475990	141481995	L1PA2:LINE:L1:-	0.882227	0.888784	0.3575			chr2	38159224	38160958	SVA_D:Other:Other:-	0.902197	0.902994	0.0105263			chr1	166311164	166312833	LTR12C:LTR:ERV1:-	0.186186	0.103272	0.607742
chr3	145645565	145651578	L1PA2:LINE:L1:+	0.892025	0.828942	0.587302			chr2	38629800	38631536	SVA_D:Other:Other:+	0.959	0.666789	0.160516			chr1	169630271	169631650	LTR12C:LTR:ERV1:+	0.917179	0.928894	0.590363
chr3	150959560	150965560	L1PA2:LINE:L1:+	0.909295	0.895339	0.646533			chr2	38982395	38983894	SVA_D:Other:Other:-	0.835416	0.155486	0.0442857			chr1	169637242	169638648	LTR12C:LTR:ERV1:+	0.935913	0.935293	0.56012
chr3	152953545	152959571	L1PA2:LINE:L1:-	0.831992	0.883176	0.343095			chr2	39854662	39856386	SVA_D:Other:Other:-	0.174134	0.0047619	0.242247			chr1	169851069	169852387	LTR12C:LTR:ERV1:+	0.902892	0.913467	0.299377
chr3	157442486	157448512	L1PA2:LINE:L1:+	0.821959	0.74752	0.310823			chr2	42222143	42223333	SVA_D:Other:Other:+	0.897743	0.303685	0.0154321			chr1	171350019	171351382	LTR12C:LTR:ERV1:-	0.599756	0.547819	0.381556
chr3	169397275	169403305	L1PA2:LINE:L1:+	0.722946	0.589669	0.144048			chr2	42240869	42242785	SVA_D:Other:Other:-	0.163604	0.0958901	0.0811688			chr1	174024670	174026070	LTR12C:LTR:ERV1:-	0.204284	0.201906	0.0509921
chr3	177106558	177112539	L1PA2:LINE:L1:-	0.867756	0.709507	0.223636			chr2	43289652	43291201	SVA_D:Other:Other:-	0.860926	0.266737	0.432729			chr1	175070211	175072001	LTR12C:LTR:ERV1:-	0.942768	0.94207	0.657147
chr3	178577736	178583767	L1PA2:LINE:L1:+	0.770303	0.610489	0.0895833			chr2	43904342	43905900	SVA_D:Other:Other:-	0.746489	0.16229	0.266224			chr1	175076240	175078158	LTR12C:LTR:ERV1:-	0.863466	0.914003	0.71073
chr3	187129911	187135940	L1PA2:LINE:L1:+	0.670418	0.655494	0			chr2	44293507	44295518	SVA_D:Other:Other:-	0.714019	0.0745753	0.381903			chr1	176317674	176318972	LTR12C:LTR:ERV1:-	0.596728	0.450414	0.112821
chr3	191867104	191873117	L1PA2:LINE:L1:-	0.792571	0.639654	0.01			chr2	48841002	48842660	SVA_D:Other:Other:-	0.263968	0.0300137	0.396388			chr1	179805207	179806630	LTR12C:LTR:ERV1:-	0.138464	0.0215568	0.756739
chr3	194808401	194814446	L1PA2:LINE:L1:+	0.81002	0.74037	0.2			chr2	51054762	51056423	SVA_D:Other:Other:-	0.619862	0.148257	0.0505102			chr1	180477567	180478949	LTR12C:LTR:ERV1:+	0.113646	0.0982177	0.503702
chr4	11794384	11800376	L1PA2:LINE:L1:+	0.820517	0.778118	0.629167			chr2	54322030	54324009	SVA_D:Other:Other:-	0.386686	0.0643065	0.0649068			chr1	181014787	181016207	LTR12C:LTR:ERV1:+	0.0864967	0.0618681	0.0504762
chr4	22148050	22154080	L1PA2:LINE:L1:+	0.747238	0.74225	0.532804			chr2	54712294	54713871	SVA_D:Other:Other:+	0.867618	0.728768	0.1364			chr1	181801376	181803117	LTR12C:LTR:ERV1:+	0.917738	0.915578	0.611706
chr4	5440328	5446355	L1PA2:LINE:L1:-	0.844749	0.851414	0.102239			chr2	55877270	55878924	SVA_D:Other:Other:+	0.742146	0.144041	0.0047619			chr1	185290049	185291379	LTR12C:LTR:ERV1:-	0.267003	0.249915	0.23687
chr4	10777017	10783044	L1PA2:LINE:L1:-	0.786336	0.796236	0.62563			chr2	64035437	64037039	SVA_D:Other:Other:+	0.776767	0.144686	0.535653			chr1	185617067	185618615	LTR12C:LTR:ERV1:-	0.842425	0.764569	0.763736
chr4	14482375	14488451	L1PA2:LINE:L1:+	0.761395	0.840279	0.731579			chr2	64268481	64269645	SVA_D:Other:Other:-	0.585155	0.116901	0.06875			chr1	187042105	187043513	LTR12C:LTR:ERV1:-	0.0755561	0.0689708	0.289683
chr4	15280290	15286276	L1PA2:LINE:L1:+	0.740386	0.755247	0.536866			chr2	85714147	85716186	SVA_D:Other:Other:+	0.231725	0.0562938	0.501946			chr1	187672563	187673985	LTR12C:LTR:ERV1:+	0.102142	0.0486873	0.160317
chr4	27071855	27077886	L1PA2:LINE:L1:-	0.811934	0.785502	0.271977			chr2	95908561	95910103	SVA_D:Other:Other:+	0.916551	0.869176	0.625622			chr1	187819155	187820596	LTR12C:LTR:ERV1:+	0.255357	0.240548	0.244574
chr4	32362197	32368202	L1PA2:LINE:L1:-	0.853296	0.75246	0.560926			chr2	105867071	105868590	SVA_D:Other:Other:+	0.12194	0.0705316	0.278124			chr1	187981611	187982987	LTR12C:LTR:ERV1:-	0.232471	0.124166	0.0125
chr4	54194898	54200929	L1PA2:LINE:L1:+	0.920467	0.936335	0.558862			chr2	128110252	128111835	SVA_D:Other:Other:+	0.912432	0.88089	0.0811289			chr1	188782035	188783659	LTR12C:LTR:ERV1:+	0.467814	0.228381	0.148444
chr4	76326404	76332436	L1PA2:LINE:L1:+	0.575287	0.414529	0.158617			chr2	134820947	134822548	SVA_D:Other:Other:+	0.815772	0.499987	0.670953			chr1	188809392	188810870	LTR12C:LTR:ERV1:-	0.214259	0.0603598	0.00877193
chr4	85047938	85053967	L1PA2:LINE:L1:+	0.784224	0.781404	0.238889			chr2	135725428	135726978	SVA_D:Other:Other:-	0.737181	0.106369	0.171429			chr1	188826588	188828276	LTR12C:LTR:ERV1:+	0.514606	0.313797	0.501071
chr4	85219933	85225963	L1PA2:LINE:L1:+	0.817232	0.799472	0.365159			chr2	143459449	143460879	SVA_D:Other:Other:+	0.899974	0.139211	0.35959			chr1	189686666	189687991	LTR12C:LTR:ERV1:-	0.147989	0.0961191	0.433184
chr4	86991543	86997572	L1PA2:LINE:L1:-	0.888082	0.745202	0.286392			chr2	153016222	153018028	SVA_D:Other:Other:+	0.961118	0.77491	0.185287			chr1	190993976	190995680	LTR12C:LTR:ERV1:-	0.877344	0.773245	0.237169
chr4	96835910	96841939	L1PA2:LINE:L1:+	0.778654	0.753253	0.616667			chr2	157307177	157309095	SVA_D:Other:Other:-	0.826974	0.13962	0.190642			chr1	191120375	191121523	LTR12C:LTR:ERV1:+	0.0369335	0.0140631	0.119009
chr4	102326824	102332852	L1PA2:LINE:L1:-	0.891613	0.870699	0.341429			chr2	161294769	161296620	SVA_D:Other:Other:-	0.847227	0.335535	0.0647392			chr1	191700761	191702076	LTR12C:LTR:ERV1:+	0.0695164	0.0145784	0.0176245
chr4	104171422	104177447	L1PA2:LINE:L1:-	0.701731	0.674106	0.309323			chr2	163326182	163327774	SVA_D:Other:Other:+	0.576893	0.0362142	0.423413			chr1	192467272	192468757	LTR12C:LTR:ERV1:-	0.908404	0.851857	0.877338
chr4	106228393	106234548	L1PA2:LINE:L1:-	0.80627	0.809535	0.715079			chr2	170431029	170432685	SVA_D:Other:Other:-	0.441998	0.0472608	0.112186			chr1	192955857	192957184	LTR12C:LTR:ERV1:+	0.288005	0.265437	0.214102
chr4	107856260	107862276	L1PA2:LINE:L1:+	0.869567	0.88798	0.558234			chr2	171005572	171007431	SVA_D:Other:Other:+	0.417236	0.0918367	0.00549451			chr1	193887160	193888610	LTR12C:LTR:ERV1:-	0.634174	0.307629	0.168452
chr4	111791965	111797977	L1PA2:LINE:L1:-	0.515428	0.489549	0.240245			chr2	173401887	173403783	SVA_D:Other:Other:+	0.912744	0.877477	0.710085			chr1	193970788	193972174	LTR12C:LTR:ERV1:+	0.0489755	0.0290593	0.402742
chr4	114410294	114416323	L1PA2:LINE:L1:-	0.908642	0.904455	0.574747			chr2	187336951	187338935	SVA_D:Other:Other:+	0.932795	0.792766	0.349601			chr1	194828012	194829376	LTR12C:LTR:ERV1:+	0.0657208	0.0179946	0.142857
chr4	121171890	121177933	L1PA2:LINE:L1:-	0.818479	0.669982	0.288889			chr2	188420652	188422627	SVA_D:Other:Other:+	0.882932	0.0991855	0.244079			chr1	195691100	195692583	LTR12C:LTR:ERV1:-	0.0820349	0.0898856	0.075463
chr4	127941723	127947710	L1PA2:LINE:L1:+	0.802957	0.727759	0.170665			chr2	198482775	198484476	SVA_D:Other:Other:+	0.79634	0.144587	0.146218			chr1	197323469	197325089	LTR12C:LTR:ERV1:-	0.492644	0.105857	0.819886
chr4	138417432	138423442	L1PA2:LINE:L1:+	0.876343	0.840922	0.149206			chr2	198560177	198562182	SVA_D:Other:Other:-	0.892753	0.424622	0.179043			chr1	199928614	199929855	LTR12C:LTR:ERV1:+	0.671846	0.479514	0.060119
chr4	164553384	164559405	L1PA2:LINE:L1:+	0.922733	0.894217	0.66514			chr2	203579253	203580799	SVA_D:Other:Other:-	0.902962	0.939695	0.682768			chr1	203869179	203870491	LTR12C:LTR:ERV1:+	0.0719195	0.0233895	0.39342
chr4	169363140	169369189	L1PA2:LINE:L1:+	0.925861	0.903941	0.416667			chr2	204071104	204072520	SVA_D:Other:Other:+	0.578841	0.0873432	0.0579832			chr1	208660918	208662348	LTR12C:LTR:ERV1:-	0.235218	0.265138	0.327108
chr4	175699613	175705629	L1PA2:LINE:L1:+	0.90048	0.827355	0.337363			chr2	204236652	204238195	SVA_D:Other:Other:-	0.93822	0.704701	0.0885582			chr1	208912842	208914265	LTR12C:LTR:ERV1:+	0.727744	0.362289	0.475683
chr4	183700210	183706233	L1PA2:LINE:L1:-	0.949912	0.918478	0.513379			chr2	207035704	207037297	SVA_D:Other:Other:-	0.186324	0.0185677	0.256126			chr1	210031201	210032546	LTR12C:LTR:ERV1:-	0.0551793	0.156293	0.478157
chr5	103410063	103416082	L1PA2:LINE:L1:-	0.853898	0.777212	0.277814			chr2	219795486	219797322	SVA_D:Other:Other:+	0.895855	0.362931	0.290838			chr1	210061592	210062849	LTR12C:LTR:ERV1:-	0.045008	0.0148826	0.116117
chr5	7193882	7199908	L1PA2:LINE:L1:+	0.64837	0.706802	0.255407			chr2	222756211	222757769	SVA_D:Other:Other:+	0.562224	0.105979	0.143311			chr1	210071321	210072711	LTR12C:LTR:ERV1:-	0.630767	0.542429	0.346667
chr5	16335519	16341549	L1PA2:LINE:L1:+	0.70722	0.536864	0.113605			chr2	230606853	230608857	SVA_D:Other:Other:+	0.204242	0.0694331	0.533863			chr1	212046744	212048193	LTR12C:LTR:ERV1:-	0.347175	0.23006	0.426524
chr5	28798897	28804921	L1PA2:LINE:L1:+	0.879396	0.892595	0.724242			chr2	233769785	233771888	SVA_D:Other:Other:+	0.668118	0.10285	0.0990706			chr1	212062706	212064060	LTR12C:LTR:ERV1:+	0.356574	0.15869	0.212081
chr5	43718055	43724076	L1PA2:LINE:L1:+	0.805741	0.70639	0.4375			chr2	240370634	240372123	SVA_D:Other:Other:-	0.658551	0.393272	0.685582			chr1	214845625	214847054	LTR12C:LTR:ERV1:-	0.375824	0.282977	0.0367364
chr5	64459844	64465875	L1PA2:LINE:L1:+	0.917878	0.918632	0.577579			chr3	15203535	15205694	SVA_D:Other:Other:-	0.6175	0.344704	0.169753			chr1	219583811	219585254	LTR12C:LTR:ERV1:+	0.366986	0.182869	0.338552
chr5	67032725	67038759	L1PA2:LINE:L1:-	0.883859	0.903716	0.789167			chr3	5154918	5156388	SVA_D:Other:Other:-	0.631406	0.11689	0.218838			chr1	220585586	220586848	LTR12C:LTR:ERV1:+	0.746834	0.470554	0.559103
chr5	70900407	70906420	L1PA2:LINE:L1:-	0.927877	0.879123	0.52753			chr3	10111143	10112829	SVA_D:Other:Other:+	0.920078	0.302222	0.0246212			chr1	220648192	220649601	LTR12C:LTR:ERV1:-	0.22027	0.198223	0.529854
chr5	77748008	77754033	L1PA2:LINE:L1:-	0.912057	0.880325	0.387558			chr3	12890535	12892062	SVA_D:Other:Other:-	0.865062	0.230365	0.171553			chr1	221458137	221459563	LTR12C:LTR:ERV1:-	0.198591	0.226107	0.0119048
chr5	83089430	83095461	L1PA2:LINE:L1:-	0.760209	0.646564	0.19619			chr3	15102690	15104572	SVA_D:Other:Other:+	0.896057	0.801725	0.146627			chr1	222222906	222224331	LTR12C:LTR:ERV1:+	0.381541	0.312881	0.2734
chr5	87348147	87354162	L1PA2:LINE:L1:+	0.775543	0.75011	0.17619			chr3	15783307	15784862	SVA_D:Other:Other:+	0.827489	0.780224	0.694329			chr1	223289507	223290833	LTR12C:LTR:ERV1:-	0.377922	0.271387	0.643084
chr5	89369046	89375053	L1PA2:LINE:L1:+	0.879109	0.862375	0.0857143			chr3	17020832	17022662	SVA_D:Other:Other:-	0.81667	0.306356	0.0253968			chr1	224539358	224540761	LTR12C:LTR:ERV1:-	0.334773	0.24986	0.573043
chr5	100515834	100521851	L1PA2:LINE:L1:+	0.82198	0.738477	0.42381			chr3	20907651	20909313	SVA_D:Other:Other:-	0.79805	0.294034	0.378571			chr1	225618884	225620446	LTR12C:LTR:ERV1:+	0.899932	0.772191	0.467446
chr5	102382456	102388473	L1PA2:LINE:L1:+	0.878639	0.890434	0.404113			chr3	23912190	23913892	SVA_D:Other:Other:-	0.909802	0.855076	0			chr1	226157286	226158918	LTR12C:LTR:ERV1:+	0.431306	0.333353	0.279422
chr5	105761083	105767082	L1PA2:LINE:L1:-	0.862572	0.917535	0.612637			chr3	32210547	32212102	SVA_D:Other:Other:+	0.536166	0.0993482	0.268585			chr1	226613277	226614557	LTR12C:LTR:ERV1:-	0.0666948	0.0202604	0.244059
chr5	127069623	127075644	L1PA2:LINE:L1:-	0.818158	0.830503	0.341637			chr3	32704931	32706383	SVA_D:Other:Other:+	0.881512	0.268058	0.0210526			chr1	228909269	228910596	LTR12C:LTR:ERV1:+	0.0829575	0.07472	0.456331
chr5	136118488	136124518	L1PA2:LINE:L1:-	0.906041	0.891158	0.619057			chr3	39268579	39270084	SVA_D:Other:Other:+	0.188571	0.0144231	0.0490575			chr1	230001022	230002569	LTR12C:LTR:ERV1:+	0.251897	0.194285	0.201319
chr5	148321836	148327853	L1PA2:LINE:L1:+	0.846821	0.847338	0.501146			chr3	41346682	41348664	SVA_D:Other:Other:+	0.808325	0.237574	0.114588			chr1	231565669	231567085	LTR12C:LTR:ERV1:-	0.96047	0.952046	0.911894
chr5	152120496	152126528	L1PA2:LINE:L1:+	0.780111	0.752264	0.455608			chr3	44861846	44863581	SVA_D:Other:Other:-	0.889427	0.878414	0.482653			chr1	231776920	231778215	LTR12C:LTR:ERV1:-	0.104127	0.0353854	0.0726757
chr5	161033056	161039090	L1PA2:LINE:L1:-	0.887461	0.869758	0.692857			chr3	46535391	46537171	SVA_D:Other:Other:+	0.260487	0.0486265	0.109803			chr1	233006365	233007754	LTR12C:LTR:ERV1:-	0.130561	0.0730639	0.0308248
chr5	161457931	161463958	L1PA2:LINE:L1:-	0.786084	0.695656	0.182313			chr3	47004908	47006441	SVA_D:Other:Other:+	0.939265	0.900948	0.369754			chr1	233264695	233266039	LTR12C:LTR:ERV1:+	0.695402	0.454029	0.717225
chr5	170510967	170516977	L1PA2:LINE:L1:-	0.861764	0.84864	0.329524			chr3	47297210	47298640	SVA_D:Other:Other:+	0.861934	0.774632	0.0756489			chr1	235303418	235305294	LTR12C:LTR:ERV1:+	0.848288	0.82082	0.153326
chr5	175703449	175709587	L1PA2:LINE:L1:-	0.919205	0.93546	0.616534			chr3	48770905	48772886	SVA_D:Other:Other:+	0.779042	0.207649	0.109864			chr1	235756818	235758248	LTR12C:LTR:ERV1:-	0.357494	0.17271	0.633568
chr5	180329521	180335537	L1PA2:LINE:L1:-	0.845405	0.699404	0.548352			chr3	50121077	50123316	SVA_D:Other:Other:-	0.355185	0.0868812	0			chr1	237471782	237473467	LTR12C:LTR:ERV1:-	0.913039	0.839697	0.904716
chr6	83099136	83105142	L1PA2:LINE:L1:-	0.881182	0.914842	0.311938			chr3	51285724	51287717	SVA_D:Other:Other:+	0.665855	0.0265058	0.614618			chr1	238846912	238848496	LTR12C:LTR:ERV1:-	0.118173	0.0476681	0.257205
chr6	117565915	117571946	L1PA2:LINE:L1:+	0.723063	0.691005	0.336905			chr3	51345648	51347066	SVA_D:Other:Other:-	0.932402	0.938782	0.219444			chr1	240087280	240088624	LTR12C:LTR:ERV1:-	0.201393	0.132286	0.651346
chr6	39422333	39428310	L1PA2:LINE:L1:+	0.810385	0.707274	0.139014			chr3	51891965	51893690	SVA_D:Other:Other:+	0.950897	0.950652	0.662449			chr1	240925607	240926995	LTR12C:LTR:ERV1:+	0.0340771	0.0281707	0.127279
chr6	52636025	52642170	L1PA2:LINE:L1:-	0.843689	0.83901	0.576515			chr3	75337883	75339607	SVA_D:Other:Other:+	0.720573	0.292509	0.197522			chr1	242018019	242019441	LTR12C:LTR:ERV1:-	0.366674	0.422594	0.04
chr6	55228234	55234265	L1PA2:LINE:L1:-	0.807354	0.841988	0.361039			chr3	82632985	82634858	SVA_D:Other:Other:+	0.351841	0.0381675	0.364388			chr1	242852552	242854022	LTR12C:LTR:ERV1:+	0.812487	0.808809	0.590374
chr6	65099653	65105689	L1PA2:LINE:L1:+	0.855389	0.777549	0.397711			chr3	100195773	100197869	SVA_D:Other:Other:-	0.523459	0.212427	0.55738			chr1	242936708	242938059	LTR12C:LTR:ERV1:-	0.545842	0.428719	0.689087
chr6	71848261	71856067	L1PA2:LINE:L1:+	0.831611	0.835701	0.658009			chr3	102973164	102974799	SVA_D:Other:Other:-	0.807882	0.621323	0.30276			chr2	234880191	234881676	LTR12C:LTR:ERV1:-	0.707911	0.448652	0.488294
chr6	76815335	76821358	L1PA2:LINE:L1:-	0.618241	0.52442	0.195556			chr3	108842186	108843995	SVA_D:Other:Other:+	0.920442	0.345979	0.177602			chr2	90809	92246	LTR12C:LTR:ERV1:+	0.860236	0.709621	0.703909
chr6	82811020	82817029	L1PA2:LINE:L1:+	0.864966	0.855049	0.21131			chr3	112764488	112766439	SVA_D:Other:Other:-	0.88953	0.180958	0.503402			chr2	190509	191898	LTR12C:LTR:ERV1:-	0.586621	0.391935	0.482321
chr6	84507461	84513489	L1PA2:LINE:L1:-	0.858085	0.752342	0.175			chr3	116768854	116770341	SVA_D:Other:Other:+	0.63476	0.10541	0.451048			chr2	1232509	1233932	LTR12C:LTR:ERV1:-	0.601515	0.618238	0.628634
chr6	85336073	85342084	L1PA2:LINE:L1:+	0.789025	0.75041	0.315303			chr3	121407004	121408513	SVA_D:Other:Other:+	0.938816	0.524539	0.0813665			chr2	4982039	4983469	LTR12C:LTR:ERV1:-	0.199575	0.0889317	0.572917
chr6	86731206	86737233	L1PA2:LINE:L1:-	0.538258	0.473511	0.170833			chr3	121919846	121921322	SVA_D:Other:Other:-	0.947171	0.585739	0.608333			chr2	10231371	10232984	LTR12C:LTR:ERV1:+	0.115763	0.0868687	0.0555556
chr6	87374926	87380956	L1PA2:LINE:L1:-	0.622178	0.578467	0.584425			chr3	122465463	122467245	SVA_D:Other:Other:+	0.818395	0.146912	0.399206			chr2	12992931	12994751	LTR12C:LTR:ERV1:-	0.671559	0.601493	0.515556
chr6	87516381	87522400	L1PA2:LINE:L1:-	0.719938	0.661979	0.3			chr3	131670365	131672102	SVA_D:Other:Other:+	0.72348	0.0427482	0.374687			chr2	13447692	13448984	LTR12C:LTR:ERV1:-	0.103385	0.231884	0.00877193
chr6	91756869	91762879	L1PA2:LINE:L1:-	0.824853	0.825165	0.234788			chr3	136441506	136443460	SVA_D:Other:Other:+	0.959864	0.898678	0.0253968			chr2	15141748	15143223	LTR12C:LTR:ERV1:-	0.133911	0.0304973	0.471349
chr6	94341306	94347327	L1PA2:LINE:L1:-	0.621355	0.567384	0.330591			chr3	136916703	136918178	SVA_D:Other:Other:-	0.747905	0.108215	0.0204545			chr2	15836007	15837410	LTR12C:LTR:ERV1:-	0.875984	0.656587	0.747248
chr6	95533881	95540025	L1PA2:LINE:L1:+	0.670021	0.573486	0.124444			chr3	177608886	177610363	SVA_D:Other:Other:-	0.538465	0.0917978	0.0403846			chr2	17374638	17376022	LTR12C:LTR:ERV1:+	0.098395	0.0369518	0.100722
chr6	100644337	100650366	L1PA2:LINE:L1:+	0.823241	0.782291	0.130159			chr3	184720944	184722318	SVA_D:Other:Other:-	0.870335	0.793792	0.65734			chr2	22409032	22410426	LTR12C:LTR:ERV1:+	0.0916387	0.0284898	0.302663
chr6	100802579	100808601	L1PA2:LINE:L1:+	0.674013	0.610021	0.328571			chr3	186528654	186530271	SVA_D:Other:Other:-	0.940682	0.919993	0.0883811			chr2	26138187	26139744	LTR12C:LTR:ERV1:+	0.334889	0.286426	0.0131766
chr6	102617741	102623571	L1PA2:LINE:L1:+	0.769356	0.770044	0.156818			chr3	186591022	186592864	SVA_D:Other:Other:+	0.149233	0.178894	0.0352513			chr2	27037156	27038455	LTR12C:LTR:ERV1:+	0.0314609	0.0541718	0.190476
chr6	105185190	105191199	L1PA2:LINE:L1:+	0.833676	0.861332	0.432011			chr3	186602163	186603392	SVA_D:Other:Other:-	0.921651	0.420531	0.0555556			chr2	27333552	27334885	LTR12C:LTR:ERV1:-	0.079727	0.0377036	0.0479515
chr6	109566421	109572454	L1PA2:LINE:L1:-	0.898807	0.855238	0.159199			chr3	190190453	190191999	SVA_D:Other:Other:+	0.451083	0.0911043	0.67287			chr2	28695380	28696868	LTR12C:LTR:ERV1:+	0.889069	0.869878	0.495988
chr6	125027989	125033976	L1PA2:LINE:L1:-	0.878071	0.780687	0.351484			chr3	197328596	197330107	SVA_D:Other:Other:-	0.882269	0.642549	0.0799172			chr2	32028612	32029951	LTR12C:LTR:ERV1:+	0.128991	0.0795128	0.108905
chr6	125046842	125052868	L1PA2:LINE:L1:+	0.829718	0.849972	0.282269			chr4	78904327	78905965	SVA_D:Other:Other:-	0.432947	0.0524787	0.0895382			chr2	33110748	33112189	LTR12C:LTR:ERV1:-	0.679966	0.472623	0.828464
chr6	127914437	127920437	L1PA2:LINE:L1:+	0.8906	0.769393	0.151123			chr4	543630	545209	SVA_D:Other:Other:-	0.673942	0.0850008	0.271944			chr2	33281591	33283058	LTR12C:LTR:ERV1:-	0.887101	0.889212	0.789453
chr6	129488305	129494343	L1PA2:LINE:L1:-	0.72994	0.683179	0.100476			chr4	3539578	3541490	SVA_D:Other:Other:-	0.874811	0.787685	0.66962			chr2	34000242	34001682	LTR12C:LTR:ERV1:+	0.939669	0.896642	0.636833
chr6	141887242	141893273	L1PA2:LINE:L1:+	0.89321	0.848412	0.19697			chr4	28515817	28517451	SVA_D:Other:Other:-	0.690571	0.282805	0.323052			chr2	34366619	34368129	LTR12C:LTR:ERV1:-	0.941796	0.943168	0.483333
chr6	142067162	142073173	L1PA2:LINE:L1:+	0.929155	0.927844	0.382784			chr4	37669823	37671675	SVA_D:Other:Other:+	0.721788	0.191439	0.0357935			chr2	36319201	36320595	LTR12C:LTR:ERV1:+	0.879839	0.856626	0.798088
chr6	142135951	142141979	L1PA2:LINE:L1:+	0.735358	0.602255	0.0910985			chr4	38808432	38810315	SVA_D:Other:Other:+	0.291876	0.00912415	0.259027			chr2	36915221	36916609	LTR12C:LTR:ERV1:+	0.487368	0.284866	0.304899
chr6	163410769	163416794	L1PA2:LINE:L1:-	0.846632	0.85149	0.156803			chr4	40142218	40143764	SVA_D:Other:Other:-	0.885973	0.628441	0.0516425			chr2	38247482	38248821	LTR12C:LTR:ERV1:+	0.0799783	0.037014	0.223583
chr7	29619552	29625579	L1PA2:LINE:L1:+	0.821831	0.841399	0.563195			chr4	46378754	46380686	SVA_D:Other:Other:+	0.179798	0.0198296	0.139947			chr2	38624270	38625554	LTR12C:LTR:ERV1:+	0.728505	0.282334	0.668486
chr7	83618641	83624658	L1PA2:LINE:L1:-	0.903343	0.851998	0.328283			chr4	54121400	54123083	SVA_D:Other:Other:-	0.898781	0.702843	0.495682			chr2	38869427	38870757	LTR12C:LTR:ERV1:-	0.0554979	0.0217472	0.562856
chr7	104198098	104204153	L1PA2:LINE:L1:-	0.78451	0.831756	0.469597			chr4	55190959	55192736	SVA_D:Other:Other:-	0.616141	0.0472695	0.105873			chr2	39471233	39472660	LTR12C:LTR:ERV1:+	0.00804369	0.0239359	0.0483245
chr7	9438387	9444411	L1PA2:LINE:L1:-	0.873594	0.840867	0.475223			chr4	57559028	57560508	SVA_D:Other:Other:-	0.581323	0.218516	0.0755245			chr2	39812323	39813702	LTR12C:LTR:ERV1:+	0.0729693	0.0434158	0.482291
chr7	13845894	13851917	L1PA2:LINE:L1:+	0.804716	0.674886	0.368266			chr4	58038669	58040267	SVA_D:Other:Other:+	0.269739	0.0245921	0.092785			chr2	41562547	41563835	LTR12C:LTR:ERV1:+	0.144336	0.0477099	0.320062
chr7	15586934	15592958	L1PA2:LINE:L1:+	0.753447	0.563881	0.25625			chr4	58089932	58091364	SVA_D:Other:Other:+	0.166715	0.0543352	0.160183			chr2	46143890	46145378	LTR12C:LTR:ERV1:-	0.272013	0.178639	0.211251
chr7	25783452	25789483	L1PA2:LINE:L1:+	0.667939	0.588219	0.399134			chr4	77343858	77345469	SVA_D:Other:Other:+	0.42743	0.0886782	0.0690741			chr2	47326688	47328118	LTR12C:LTR:ERV1:+	0.933626	0.907745	0.574156
chr7	30454091	30460119	L1PA2:LINE:L1:-	0.837934	0.79779	0.156548			chr4	79468464	79470206	SVA_D:Other:Other:+	0.224094	0.0395189	0.209429			chr2	47334236	47335721	LTR12C:LTR:ERV1:+	0.935136	0.933749	0.602726
chr7	32722290	32728327	L1PA2:LINE:L1:-	0.90148	0.932854	0.398578			chr4	84863980	84865850	SVA_D:Other:Other:-	0.793431	0.0969495	0.252098			chr2	50310564	50311899	LTR12C:LTR:ERV1:-	0.0438685	0.0548894	0.751044
chr7	35132569	35138584	L1PA2:LINE:L1:+	0.942741	0.926115	0.157671			chr4	87916431	87917873	SVA_D:Other:Other:+	0.836487	0.138804	0.0942857			chr2	51377675	51379323	LTR12C:LTR:ERV1:-	0.925982	0.879822	0.724244
chr7	50966539	50972571	L1PA2:LINE:L1:+	0.773425	0.784182	0.16706			chr4	110517881	110519798	SVA_D:Other:Other:-	0.883789	0.499607	0.135476			chr2	52006576	52007999	LTR12C:LTR:ERV1:-	0.0575111	0.0680889	0.338431
chr7	53094014	53100029	L1PA2:LINE:L1:-	0.890067	0.85456	0.444114			chr4	113878169	113879804	SVA_D:Other:Other:-	0.640601	0.225214	0.106349			chr2	52233754	52235152	LTR12C:LTR:ERV1:+	0.362386	0.206527	0.418463
chr7	56652489	56658517	L1PA2:LINE:L1:+	0.748922	0.739223	0.0496732			chr4	115437028	115438572	SVA_D:Other:Other:+	0.288903	0.0699713	0.191721			chr2	53583403	53584890	LTR12C:LTR:ERV1:+	0.718574	0.672387	0.580468
chr7	62319285	62325304	L1PA2:LINE:L1:+	0.478034	0.554128	0.301732			chr4	123732307	123734357	SVA_D:Other:Other:+	0.432749	0.0864861	0.0474545			chr2	65195955	65197372	LTR12C:LTR:ERV1:+	0.31826	0.525157	0.273621
chr7	83691725	83697752	L1PA2:LINE:L1:+	0.859891	0.779353	0.216891			chr4	123936338	123938270	SVA_D:Other:Other:-	0.890998	0.314714	0.325139			chr2	69849032	69850460	LTR12C:LTR:ERV1:+	0.856468	0.728866	0.484821
chr7	84879170	84885195	L1PA2:LINE:L1:+	0.749568	0.74139	0.286905			chr4	129003968	129005815	SVA_D:Other:Other:-	0.917248	0.788331	0.0842294			chr2	70375275	70376923	LTR12C:LTR:ERV1:+	0.879227	0.841916	0.112226
chr7	84959003	84965055	L1PA2:LINE:L1:-	0.874453	0.830074	0.340476			chr4	139774640	139776433	SVA_D:Other:Other:+	0.781657	0.247582	0.0599773			chr2	71318652	71320181	LTR12C:LTR:ERV1:-	0.540517	0.583519	0.560291
chr7	85969524	85975549	L1PA2:LINE:L1:+	0.808973	0.78196	0.446337			chr4	152446904	152448727	SVA_D:Other:Other:-	0.935654	0.60249	0.115816			chr2	72313836	72315149	LTR12C:LTR:ERV1:+	0.45014	0.253352	0.485584
chr7	91532996	91539020	L1PA2:LINE:L1:-	0.838923	0.821167	0.5225			chr4	153787033	153788705	SVA_D:Other:Other:-	0.920822	0.729719	0.177579			chr2	72648774	72650520	LTR12C:LTR:ERV1:+	0.784962	0.646663	0.595513
chr7	110197588	110203620	L1PA2:LINE:L1:-	0.853611	0.851613	0			chr4	159666937	159668611	SVA_D:Other:Other:-	0.535489	0.134173	0.00909091			chr2	76924631	76925811	LTR12C:LTR:ERV1:-	0.150122	0.0280166	0.839161
chr7	113382955	113388955	L1PA2:LINE:L1:+	0.841242	0.851557	0.265447			chr4	165940372	165942089	SVA_D:Other:Other:-	0.407182	0.00745625	0.0963745			chr2	77817434	77818847	LTR12C:LTR:ERV1:+	0.883574	0.778441	0.805599
chr7	119226763	119232790	L1PA2:LINE:L1:+	0.83481	0.829467	0.506508			chr4	170490608	170492323	SVA_D:Other:Other:+	0.926552	0.795133	0.0950864			chr2	77960995	77962445	LTR12C:LTR:ERV1:-	0.35497	0.252938	0.761389
chr7	136098928	136104958	L1PA2:LINE:L1:-	0.8734	0.81216	0.24			chr4	170966872	170968713	SVA_D:Other:Other:+	0.148977	0.072364	0.0244444			chr2	79005943	79007321	LTR12C:LTR:ERV1:+	0.241703	0.133137	0.327847
chr7	140732406	140738552	L1PA2:LINE:L1:+	0.816093	0.683815	0.153634			chr4	175612516	175614107	SVA_D:Other:Other:+	0.941051	0.579436	0.556956			chr2	82212122	82213512	LTR12C:LTR:ERV1:+	0.246349	0.166302	0.226631
chr8	2263735	2269787	L1PA2:LINE:L1:-	0.722958	0.740879	0.498881			chr4	183961293	183962868	SVA_D:Other:Other:-	0.957217	0.487154	0.025			chr2	82552413	82553884	LTR12C:LTR:ERV1:-	0.21607	0.185256	0.233441
chr8	4711928	4717941	L1PA2:LINE:L1:+	0.722967	0.612226	0.400119			chr4	188578632	188580034	SVA_D:Other:Other:+	0.894396	0.239862	0.309108			chr2	83164622	83166134	LTR12C:LTR:ERV1:-	0.31281	0.290077	0.0916667
chr8	10789935	10795937	L1PA2:LINE:L1:-	0.774949	0.703975	0.110417			chr4	188912091	188913149	SVA_D:Other:Other:-	0.120358	0.086264	0.0648287			chr2	83407984	83409355	LTR12C:LTR:ERV1:+	0.819459	0.800014	0.626865
chr8	36265636	36271786	L1PA2:LINE:L1:-	0.751555	0.792389	0.667567			chr5	1585531	1587428	SVA_D:Other:Other:+	0.940883	0.909492	0.814413			chr2	83472345	83473615	LTR12C:LTR:ERV1:-	0.175325	0.0589632	0.764426
chr8	48006712	48012603	L1PA2:LINE:L1:-	0.848598	0.863349	0.387049			chr5	18309070	18310851	SVA_D:Other:Other:+	0.401956	0.0923907	0.438925			chr2	85560499	85562038	LTR12C:LTR:ERV1:-	0.523605	0.582022	0.372619
chr8	49706464	49712489	L1PA2:LINE:L1:-	0.893392	0.787725	0.634829			chr5	32141682	32143573	SVA_D:Other:Other:+	0.923192	0.652183	0.0226498			chr2	88802510	88803921	LTR12C:LTR:ERV1:+	0.407677	0.224465	0.0923077
chr8	60782358	60788381	L1PA2:LINE:L1:-	0.742302	0.775323	0.142857			chr5	37012563	37014358	SVA_D:Other:Other:-	0.938437	0.919432	0.0598828			chr2	98755282	98756710	LTR12C:LTR:ERV1:+	0.249142	0.0967747	0.246656
chr8	64709966	64715996	L1PA2:LINE:L1:-	0.886506	0.820672	0.271062			chr5	37295138	37296790	SVA_D:Other:Other:+	0.951367	0.896625	0.0205882			chr2	107200700	107202182	LTR12C:LTR:ERV1:+	0.176946	0.163729	0.217172
chr8	67861338	67867354	L1PA2:LINE:L1:-	0.92535	0.918626	0.607071			chr5	37414883	37416667	SVA_D:Other:Other:-	0.927826	0.215954	0.112649			chr2	108008561	108009937	LTR12C:LTR:ERV1:+	0.375626	0.293608	0.843152
chr8	70166454	70172484	L1PA2:LINE:L1:+	0.863755	0.846417	0.369388			chr5	38861219	38863315	SVA_D:Other:Other:-	0.588854	0.273103	0.468358			chr2	108084844	108086355	LTR12C:LTR:ERV1:-	0.453168	0.386483	0.599242
chr8	78852748	78858761	L1PA2:LINE:L1:+	0.918002	0.903595	0.302817			chr5	42979911	42981491	SVA_D:Other:Other:+	0.910389	0.405153	0.0255952			chr2	108151671	108153100	LTR12C:LTR:ERV1:-	0.884988	0.84533	0.888375
chr8	82680451	82686477	L1PA2:LINE:L1:+	0.865251	0.742189	0.102381			chr5	43521580	43523181	SVA_D:Other:Other:+	0.920478	0.460285	0.0924825			chr2	108363079	108364358	LTR12C:LTR:ERV1:-	0.157698	0.0340713	0.0285714
chr8	85376377	85382401	L1PA2:LINE:L1:-	0.830548	0.798264	0.554058			chr5	53676571	53678077	SVA_D:Other:Other:+	0.26516	0.0596234	0.33033			chr2	108647845	108649475	LTR12C:LTR:ERV1:+	0.845779	0.855773	0.781393
chr8	88334031	88340057	L1PA2:LINE:L1:-	0.734306	0.679028	0.566964			chr5	55309745	55311848	SVA_D:Other:Other:-	0.583566	0.0980751	0.436852			chr2	110946772	110948335	LTR12C:LTR:ERV1:-	0.947634	0.950132	0.707253
chr8	88637058	88643061	L1PA2:LINE:L1:+	0.856303	0.687259	0.406527			chr5	55667732	55669319	SVA_D:Other:Other:+	0.930342	0.199461	0.312526			chr2	112439244	112440830	LTR12C:LTR:ERV1:+	0.648975	0.588748	0.302733
chr8	89161077	89167109	L1PA2:LINE:L1:+	0.781734	0.774572	0.10125			chr5	59726368	59727946	SVA_D:Other:Other:-	0.916861	0.674431	0.175863			chr2	114461445	114462547	LTR12C:LTR:ERV1:-	0.0616622	0.0300995	0.16064
chr8	92881746	92887762	L1PA2:LINE:L1:+	0.728775	0.650794	0.158377			chr5	61808434	61810466	SVA_D:Other:Other:-	0.8212	0.386496	0.0918519			chr2	117828062	117829687	LTR12C:LTR:ERV1:-	0.707938	0.488579	0.783617
chr8	97128905	97134926	L1PA2:LINE:L1:+	0.580172	0.532418	0.147754			chr5	62379046	62380495	SVA_D:Other:Other:-	0.742342	0.284233	0.149327			chr2	120754376	120755784	LTR12C:LTR:ERV1:+	0.157399	0.0477832	0.168036
chr8	99272503	99278521	L1PA2:LINE:L1:+	0.780408	0.66575	0.673077			chr5	67618929	67620426	SVA_D:Other:Other:-	0.69368	0.106535	0.124334			chr2	121016384	121017893	LTR12C:LTR:ERV1:-	0.908089	0.898225	0.675694
chr8	99626673	99632730	L1PA2:LINE:L1:+	0.926048	0.927886	0.319303			chr5	68358093	68359665	SVA_D:Other:Other:-	0.224912	0.0676483	0.0642857			chr2	124441165	124443947	LTR12C:LTR:ERV1:+	0.644057	0.599975	0.160953
chr8	102690297	102696321	L1PA2:LINE:L1:+	0.831032	0.81403	0.479834			chr5	68810356	68812368	SVA_D:Other:Other:-	0.870076	0.30396	0.0484782			chr2	124583486	124584877	LTR12C:LTR:ERV1:-	0.33179	0.24889	0.513293
chr8	104615224	104621246	L1PA2:LINE:L1:-	0.813109	0.787527	0.421514			chr5	70846940	70848682	SVA_D:Other:Other:-	0.915625	0.819185	0.0186667			chr2	125744168	125745525	LTR12C:LTR:ERV1:-	0.0620261	0.0109125	0.0646104
chr8	104795497	104801491	L1PA2:LINE:L1:-	0.87329	0.895929	0.517328			chr5	76107393	76109499	SVA_D:Other:Other:+	0.263288	0.056408	0.113651			chr2	126179639	126181349	LTR12C:LTR:ERV1:+	0.369062	0.359675	0.456877
chr8	113606234	113612259	L1PA2:LINE:L1:+	0.846553	0.716869	0.467134			chr5	77686475	77687882	SVA_D:Other:Other:-	0.961205	0.569148	0.124286			chr2	126235789	126237274	LTR12C:LTR:ERV1:-	0.783913	0.514548	0.611273
chr8	120171637	120177649	L1PA2:LINE:L1:-	0.837547	0.869152	0.126667			chr5	79596364	79598167	SVA_D:Other:Other:+	0.892089	0.166773	0.0963719			chr2	126699672	126701058	LTR12C:LTR:ERV1:-	0.51734	0.184807	0.848857
chr8	123256657	123262675	L1PA2:LINE:L1:+	0.796425	0.694485	0.0280112			chr5	81278384	81280269	SVA_D:Other:Other:-	0.876926	0.752876	0.0779762			chr2	129428775	129430262	LTR12C:LTR:ERV1:-	0.86951	0.686706	0.714582
chr8	124872226	124878247	L1PA2:LINE:L1:-	0.772598	0.656719	0.37			chr5	87911037	87912636	SVA_D:Other:Other:+	0.678932	0.0830816	0.1902			chr2	131748837	131750273	LTR12C:LTR:ERV1:+	0.0657322	0.0371701	0.12085
chr8	129726597	129732634	L1PA2:LINE:L1:+	0.713192	0.635133	0.470887			chr5	108327587	108329296	SVA_D:Other:Other:-	0.912493	0.818704	0.404767			chr2	134866040	134867484	LTR12C:LTR:ERV1:-	0.0926877	0.0655707	0.789807
chr8	130164370	130170396	L1PA2:LINE:L1:-	0.834802	0.735031	0.1375			chr5	112289880	112291497	SVA_D:Other:Other:+	0.693997	0.0802073	0.125794			chr2	134887339	134888888	LTR12C:LTR:ERV1:+	0.287807	0.130796	0.403988
chr8	136271344	136277373	L1PA2:LINE:L1:+	0.738312	0.505235	0.355267			chr5	116337459	116338630	SVA_D:Other:Other:-	0.585091	0.067134	0.408315			chr2	136844819	136846157	LTR12C:LTR:ERV1:-	0.0385776	0.0219085	0.154229
chr8	138570827	138576855	L1PA2:LINE:L1:-	0.896271	0.885967	0.556702			chr5	116934694	116936530	SVA_D:Other:Other:-	0.179703	0.0275714	0.0875902			chr2	137515852	137517249	LTR12C:LTR:ERV1:+	0.115954	0.0524016	0.643157
chr9	83356577	83362604	L1PA2:LINE:L1:-	0.77865	0.636922	0.193162			chr5	118456986	118459044	SVA_D:Other:Other:-	0.942092	0.787551	0.198173			chr2	138087961	138089741	LTR12C:LTR:ERV1:-	0.657896	0.517801	0.539505
chr9	6135847	6141850	L1PA2:LINE:L1:+	0.817874	0.816083	0.233294			chr5	122248429	122249846	SVA_D:Other:Other:-	0.904028	0.83223	0.530724			chr2	138473193	138474629	LTR12C:LTR:ERV1:+	0.803668	0.804128	0.586458
chr9	13037882	13043908	L1PA2:LINE:L1:+	0.832451	0.796893	0.0690476			chr5	132318083	132319679	SVA_D:Other:Other:-	0.519707	0.137822	0.257143			chr2	140167728	140168937	LTR12C:LTR:ERV1:+	0.0617549	0.0320392	0.018287
chr9	27690517	27696576	L1PA2:LINE:L1:+	0.818005	0.766203	0.204029			chr5	136872689	136874819	SVA_D:Other:Other:-	0.856843	0.482634	0.431019			chr2	140747395	140748833	LTR12C:LTR:ERV1:-	0.222724	0.133216	0.115344
chr9	28348132	28354160	L1PA2:LINE:L1:+	0.868116	0.88002	0.355714			chr5	138111732	138113595	SVA_D:Other:Other:-	0.841775	0.817038	0.225714			chr2	140831182	140832494	LTR12C:LTR:ERV1:+	0.244804	0.146608	0.332415
chr9	32710377	32716386	L1PA2:LINE:L1:+	0.950496	0.946736	0.591342			chr5	138391320	138393022	SVA_D:Other:Other:+	0.813584	0.139144	0.112665			chr2	143303446	143304849	LTR12C:LTR:ERV1:+	0.120532	0.0777887	0.466982
chr9	32729014	32735045	L1PA2:LINE:L1:+	0.850737	0.791454	0.617949			chr5	138505515	138507406	SVA_D:Other:Other:+	0.901777	0.280173	0.223507			chr2	146637650	146639044	LTR12C:LTR:ERV1:-	0.1174	0.0236201	0.339497
chr9	77039190	77045220	L1PA2:LINE:L1:+	0.847074	0.818588	0.229396			chr5	139806123	139808266	SVA_D:Other:Other:-	0.886718	0.616913	0.105754			chr2	146717295	146718625	LTR12C:LTR:ERV1:-	0.783506	0.678972	0.778439
chr9	83269031	83275050	L1PA2:LINE:L1:-	0.862105	0.913072	0.455761			chr5	149049095	149051004	SVA_D:Other:Other:-	0.403704	0.0239279	0.465942			chr2	147160281	147161811	LTR12C:LTR:ERV1:-	0.355074	0.229033	0.558201
chr9	88772003	88778037	L1PA2:LINE:L1:+	0.85025	0.884839	0.620472			chr5	156440514	156442109	SVA_D:Other:Other:+	0.792115	0.529595	0.495355			chr2	148264296	148265791	LTR12C:LTR:ERV1:+	0.816744	0.765283	0.630548
chr9	89220968	89226969	L1PA2:LINE:L1:-	0.849295	0.745861	0.14			chr5	156845946	156847661	SVA_D:Other:Other:+	0.910657	0.825553	0.568787			chr2	148442880	148444366	LTR12C:LTR:ERV1:-	0.729953	0.692831	0.81991
chr9	94976690	94982694	L1PA2:LINE:L1:+	0.889078	0.812377	0.368022			chr5	175678584	175680162	SVA_D:Other:Other:-	0.944112	0.895369	0.499288			chr2	148584269	148585720	LTR12C:LTR:ERV1:+	0.0553094	0.00589548	0
chr9	102261023	102267041	L1PA2:LINE:L1:+	0.851434	0.724282	0.169229			chr5	175860141	175861816	SVA_D:Other:Other:+	0.870613	0.698391	0.684893			chr2	149435152	149436521	LTR12C:LTR:ERV1:-	0.950333	0.940217	0.207568
chr9	103289510	103295533	L1PA2:LINE:L1:+	0.876763	0.800373	0.53898			chr5	179261430	179262696	SVA_D:Other:Other:-	0.94023	0.963789	0.0285714			chr2	151026907	151028102	LTR12C:LTR:ERV1:-	0.163653	0.074378	0.0042735
chr9	103452995	103459025	L1PA2:LINE:L1:+	0.770514	0.743697	0.318397			chr5	180197674	180198773	SVA_D:Other:Other:-	0.607334	0.104423	0.39			chr2	151397802	151399635	LTR12C:LTR:ERV1:-	0.0660365	0.0749567	0.226333
chr9	108338448	108344473	L1PA2:LINE:L1:-	0.891173	0.907806	0.131307			chr6	5835119	5836932	SVA_D:Other:Other:-	0.432198	0.121862	0.45592			chr2	152152338	152153892	LTR12C:LTR:ERV1:+	0.0799915	0.060027	0.182857
chr9	108943898	108949922	L1PA2:LINE:L1:-	0.90367	0.88278	0.557143			chr6	15415045	15416973	SVA_D:Other:Other:-	0.921581	0.246062	0.185268			chr2	153660584	153661868	LTR12C:LTR:ERV1:-	0.177861	0.179758	0.16498
chr9	122383582	122389628	L1PA2:LINE:L1:-	0.472797	0.480296	0.153846			chr6	15725806	15727588	SVA_D:Other:Other:-	0.425896	0.116283	0.11263			chr2	157473678	157475136	LTR12C:LTR:ERV1:-	0.0464427	0.0575728	0.169048
chr9	126665649	126671644	L1PA2:LINE:L1:+	0.9339	0.925718	0.748333			chr6	17734907	17736765	SVA_D:Other:Other:-	0.919506	0.824684	0.24758			chr2	158823621	158824947	LTR12C:LTR:ERV1:-	0.163252	0.0217684	0.457431
chrX	135522427	135528460	L1PA2:LINE:L1:-	0.884595	0.893937	0.55996			chr6	33452841	33454399	SVA_D:Other:Other:-	0.803347	0.213435	0.347741			chr2	163091186	163092413	LTR12C:LTR:ERV1:+	0.0804871	0.0326577	0.657357
chrX	42284112	42290142	L1PA2:LINE:L1:-	0.793906	0.616301	0.263968			chr6	33799714	33801379	SVA_D:Other:Other:-	0.559053	0.0940265	0.10904			chr2	163882597	163883992	LTR12C:LTR:ERV1:+	0.116835	0.0238213	0.0270833
chrX	42747619	42753620	L1PA2:LINE:L1:+	0.830659	0.785225	0.153247			chr6	34753552	34755313	SVA_D:Other:Other:+	0.886957	0.14985	0.0181818			chr2	164765852	164767408	LTR12C:LTR:ERV1:+	0.391133	0.159069	0.730951
chrX	116861896	116867709	L1PA2:LINE:L1:-	0.765145	0.473066	0.08			chr6	52519789	52521773	SVA_D:Other:Other:-	0.469932	0.0591072	0.0454832			chr2	164769939	164771378	LTR12C:LTR:ERV1:+	0.29887	0.121202	0.0392857
chrX	128178314	128184378	L1PA2:LINE:L1:+	0.94081	0.928849	0.82			chr6	53169266	53171062	SVA_D:Other:Other:-	0.45317	0.0338308	0.0709596			chr2	165850448	165851831	LTR12C:LTR:ERV1:-	0.151323	0.0254491	0.01875
chrY	15290986	15297016	L1PA2:LINE:L1:-	0.722208	0.673033	0.300667			chr6	55774113	55775827	SVA_D:Other:Other:-	0.429774	0.122242	0.300315			chr2	169512848	169514513	LTR12C:LTR:ERV1:-	0.894187	0.831673	0.301246
chr10	22412838	22418868	L1PA2:LINE:L1:-	0.868349	0.847007	0.300926			chr6	56688783	56690317	SVA_D:Other:Other:+	0.929095	0.823609	0.0714727			chr2	169580515	169581973	LTR12C:LTR:ERV1:-	0.93596	0.939019	0.506149
chr10	18319580	18325604	L1PA2:LINE:L1:-	0.705746	0.615331	0.24			chr6	71975115	71977144	SVA_D:Other:Other:-	0.543329	0.320766	0.417896			chr2	170697858	170699364	LTR12C:LTR:ERV1:+	0.434942	0.446522	0.213375
chr10	25804298	25810320	L1PA2:LINE:L1:-	0.862643	0.856686	0.150216			chr6	74369587	74371468	SVA_D:Other:Other:-	0.923353	0.894184	0.111765			chr2	171770952	171772415	LTR12C:LTR:ERV1:-	0.571314	0.531753	0.596964
chr10	38185898	38191914	L1PA2:LINE:L1:+	0.898413	0.86046	0.466124			chr6	74560127	74561707	SVA_D:Other:Other:-	0.824116	0.422782	0.348633			chr2	174146465	174147877	LTR12C:LTR:ERV1:-	0.0231361	0.00548654	0.651904
chr10	38284371	38290379	L1PA2:LINE:L1:+	0.910556	0.917179	0.419298			chr6	84953492	84955343	SVA_D:Other:Other:-	0.15516	0.0369295	0.243067			chr2	175412154	175413839	LTR12C:LTR:ERV1:-	0.639858	0.442681	0.32169
chr10	42436311	42442298	L1PA2:LINE:L1:+	0.403645	0.399381	0.384711			chr6	86547632	86549418	SVA_D:Other:Other:+	0.501737	0.412555	0.503815			chr2	175573299	175574851	LTR12C:LTR:ERV1:-	0.796216	0.554242	0.830269
chr10	42930829	42936860	L1PA2:LINE:L1:+	0.919169	0.891469	0.578755			chr6	99589218	99590754	SVA_D:Other:Other:+	0.841131	0.264306	0.271875			chr2	177872394	177873830	LTR12C:LTR:ERV1:+	0.594656	0.412962	0.825995
chr10	57442836	57448852	L1PA2:LINE:L1:-	0.819746	0.647674	0.209524			chr6	100097411	100098917	SVA_D:Other:Other:-	0.488893	0.0729407	0.377108			chr2	178700225	178701747	LTR12C:LTR:ERV1:+	0.954488	0.931925	0.76045
chr10	82482265	82488300	L1PA2:LINE:L1:-	0.858685	0.885474	0.584987			chr6	106300985	106302823	SVA_D:Other:Other:-	0.105848	0.0549524	0.138492			chr2	181555931	181557152	LTR12C:LTR:ERV1:+	0.0287815	0.00739072	0.113276
chr10	84103818	84109842	L1PA2:LINE:L1:-	0.78634	0.759382	0.0897436			chr6	108123913	108125270	SVA_D:Other:Other:+	0.574852	0	0.00454545			chr2	183473041	183474480	LTR12C:LTR:ERV1:+	0.376397	0.411531	0.148085
chr10	86039723	86045762	L1PA2:LINE:L1:+	0.832052	0.77768	0.251276			chr6	108254883	108256987	SVA_D:Other:Other:+	0.907284	0.796862	0.173769			chr2	184410528	184411939	LTR12C:LTR:ERV1:-	0.762856	0.473504	0.409373
chr10	96584417	96590438	L1PA2:LINE:L1:-	0.584138	0.592112	0.422161			chr6	108590439	108592150	SVA_D:Other:Other:+	0.914379	0.21376	0.0102041			chr2	184757088	184758564	LTR12C:LTR:ERV1:+	0.857682	0.623053	0.712259
chr10	100912494	100918515	L1PA2:LINE:L1:+	0.902161	0.902315	0.277712			chr6	112368273	112369575	SVA_D:Other:Other:+	0.832236	0.0694952	0.126927			chr2	185997166	185998638	LTR12C:LTR:ERV1:+	0.596274	0.386776	0.0406845
chr10	110983379	110989393	L1PA2:LINE:L1:+	0.793708	0.890245	0.427608			chr6	112848862	112850423	SVA_D:Other:Other:-	0.302199	0.112995	0.123281			chr2	187826831	187828310	LTR12C:LTR:ERV1:+	0.247543	0.138301	0.111842
chr10	117121846	117128053	L1PA2:LINE:L1:-	0.88281	0.880965	0.353452			chr6	135684208	135686081	SVA_D:Other:Other:-	0.784225	0.395566	0.30178			chr2	188816267	188817775	LTR12C:LTR:ERV1:+	0.926367	0.887615	0.706146
chr10	118838549	118844574	L1PA2:LINE:L1:-	0.77454	0.551184	0.308637			chr6	144753814	144755474	SVA_D:Other:Other:-	0.957154	0.700163	0.158048			chr2	189470337	189471684	LTR12C:LTR:ERV1:-	0.195635	0.196826	0.107917
chr11	108131353	108137370	L1PA2:LINE:L1:+	0.91053	0.938125	0.664636			chr6	150106542	150108468	SVA_D:Other:Other:-	0.86221	0.39642	0.0595571			chr2	189808223	189809713	LTR12C:LTR:ERV1:-	0.273783	0.127566	0.723253
chr11	6206580	6212596	L1PA2:LINE:L1:+	0.770796	0.731903	0.427656			chr6	151770764	151772353	SVA_D:Other:Other:+	0.854558	0.607902	0.130266			chr2	191624819	191626254	LTR12C:LTR:ERV1:-	0.0480195	0.054478	0.0115327
chr11	14649712	14655706	L1PA2:LINE:L1:-	0.922088	0.861178	0.333308			chr6	155007770	155009399	SVA_D:Other:Other:+	0.14244	0.0371996	0.0652611			chr2	192786202	192787725	LTR12C:LTR:ERV1:+	0.0700423	0.0313369	0.221352
chr11	17050037	17056202	L1PA2:LINE:L1:-	0.90166	0.939635	0.581283			chr6	155286732	155288566	SVA_D:Other:Other:-	0.890849	0.423723	0.254669			chr2	193372514	193373936	LTR12C:LTR:ERV1:+	0.906524	0.900607	0.735481
chr11	22306353	22312334	L1PA2:LINE:L1:+	0.832462	0.877547	0.24026			chr6	156990798	156992316	SVA_D:Other:Other:+	0.551235	0.0998719	0.524157			chr2	194866369	194868016	LTR12C:LTR:ERV1:-	0.876711	0.854458	0.7295
chr11	26986665	26992681	L1PA2:LINE:L1:+	0.753655	0.546999	0.0909091			chr6	158729032	158730974	SVA_D:Other:Other:-	0.933445	0.571335	0.392857			chr2	194884702	194886213	LTR12C:LTR:ERV1:+	0.644416	0.343433	0.752173
chr11	37262262	37268266	L1PA2:LINE:L1:-	0.874077	0.84793	0.505628			chr7	2341724	2343603	SVA_D:Other:Other:+	0.902208	0.88305	0.079196			chr2	194954335	194955670	LTR12C:LTR:ERV1:-	0.25842	0.0614967	0.344922
chr11	39868206	39874204	L1PA2:LINE:L1:+	0.827555	0.729018	0.573438			chr7	4662941	4664548	SVA_D:Other:Other:+	0.912357	0.810272	0.20369			chr2	196380221	196381696	LTR12C:LTR:ERV1:+	0.58825	0.602543	0.154655
chr11	40607022	40613051	L1PA2:LINE:L1:-	0.873151	0.850694	0.369683			chr7	7013997	7015756	SVA_D:Other:Other:-	0.810464	0.809566	0.593525			chr2	196411223	196412590	LTR12C:LTR:ERV1:-	0.0492443	0.028378	0.230952
chr11	42450813	42456836	L1PA2:LINE:L1:-	0.798222	0.688959	0.409481			chr7	8929573	8930932	SVA_D:Other:Other:+	0.34236	0.011858	0.0747288			chr2	198235122	198236490	LTR12C:LTR:ERV1:+	0.0723893	0.0329128	0.271268
chr11	43367651	43373668	L1PA2:LINE:L1:-	0.905451	0.88386	0.294815			chr7	13141599	13143290	SVA_D:Other:Other:+	0.617564	0.0716445	0.0785714			chr2	198455266	198456845	LTR12C:LTR:ERV1:-	0.404498	0.133892	0.620419
chr11	49796675	49802703	L1PA2:LINE:L1:-	0.55443	0.48597	0.111111			chr7	22839828	22841483	SVA_D:Other:Other:+	0.525479	0.0221749	0.0746032			chr2	201039324	201040639	LTR12C:LTR:ERV1:+	0.116167	0.119104	0.0190476
chr11	55227392	55233413	L1PA2:LINE:L1:+	0.356372	0.345907	0.249306			chr7	23084915	23087035	SVA_D:Other:Other:-	0.534532	0.0707591	0.50368			chr2	203367926	203369340	LTR12C:LTR:ERV1:+	0.907258	0.916443	0.557713
chr11	55453116	55459143	L1PA2:LINE:L1:+	0.686316	0.630488	0.497835			chr7	26187081	26188695	SVA_D:Other:Other:+	0.918525	0.280572	0.0357336			chr2	204506591	204508114	LTR12C:LTR:ERV1:-	0.221485	0.0975602	0.258226
chr11	57761634	57767659	L1PA2:LINE:L1:-	0.858174	0.785019	0.458462			chr7	26300852	26302656	SVA_D:Other:Other:+	0.606326	0.0631876	0.108601			chr2	204649366	204650863	LTR12C:LTR:ERV1:-	0.32577	0.307914	0.0360979
chr11	60202890	60208914	L1PA2:LINE:L1:+	0.826696	0.779775	0.302647			chr7	36236044	36237518	SVA_D:Other:Other:+	0.329067	0.0301916	0.0892514			chr2	206841781	206843153	LTR12C:LTR:ERV1:+	0.2598	0.172786	0.209317
chr11	63202775	63208798	L1PA2:LINE:L1:+	0.587592	0.529363	0.311111			chr7	47998379	47999985	SVA_D:Other:Other:+	0.899706	0.858015	0			chr2	209091606	209092961	LTR12C:LTR:ERV1:-	0.886566	0.74565	0.785012
chr11	75459661	75465694	L1PA2:LINE:L1:+	0.949121	0.926909	0.37381			chr7	50526617	50528763	SVA_D:Other:Other:+	0.344597	0.0680861	0.381048			chr2	210251920	210253226	LTR12C:LTR:ERV1:+	0.237908	0.297566	0.292782
chr11	89822864	89828897	L1PA2:LINE:L1:-	0.849069	0.69312	0.134172			chr7	51275134	51276762	SVA_D:Other:Other:+	0.916528	0.852666	0.169468			chr2	210864363	210865847	LTR12C:LTR:ERV1:-	0.809415	0.628679	0.886532
chr11	91760054	91766290	L1PA2:LINE:L1:+	0.830455	0.77697	0.237446			chr7	54734724	54736467	SVA_D:Other:Other:-	0.117747	0.0473251	0.0259921			chr2	212388118	212389663	LTR12C:LTR:ERV1:-	0.6684	0.487306	0.403108
chr11	92905613	92911690	L1PA2:LINE:L1:-	0.897408	0.944339	0.624328			chr7	55469238	55471173	SVA_D:Other:Other:-	0.953137	0.855721	0.399134			chr2	213584882	213586336	LTR12C:LTR:ERV1:-	0.30835	0.186536	0.69601
chr11	93965690	93971694	L1PA2:LINE:L1:-	0.664878	0.598698	0.468149			chr7	62059486	62061081	SVA_D:Other:Other:-	0.550585	0.580954	0.636485			chr2	216072423	216073812	LTR12C:LTR:ERV1:+	0.910113	0.855395	0.844983
chr11	95359490	95365515	L1PA2:LINE:L1:-	0.852449	0.847416	0.242163			chr7	64037207	64038509	SVA_D:Other:Other:+	0.0614245	0.00906104	0.244475			chr2	216109689	216111019	LTR12C:LTR:ERV1:-	0.900505	0.690211	0.892332
chr11	133510698	133516723	L1PA2:LINE:L1:+	0.862674	0.82047	0.31381			chr7	64177666	64179262	SVA_D:Other:Other:+	0.712532	0.0517529	0.0137709			chr2	217749798	217751140	LTR12C:LTR:ERV1:+	0.114972	0.0497435	0.369553
chr12	4618061	4624067	L1PA2:LINE:L1:+	0.910246	0.85524	0.647204			chr7	64198162	64199994	SVA_D:Other:Other:-	0.395618	0.0299645	0.13647			chr2	218651018	218652535	LTR12C:LTR:ERV1:-	0.388972	0.212939	0.311742
chr12	7403727	7409859	L1PA2:LINE:L1:+	0.906353	0.90377	0.578295			chr7	64244516	64246091	SVA_D:Other:Other:+	0.809192	0.0909469	0.148193			chr2	220065169	220066713	LTR12C:LTR:ERV1:-	0.321908	0.149486	0.0976407
chr12	17921294	17927323	L1PA2:LINE:L1:-	0.817672	0.833066	0.347619			chr7	73210948	73212455	SVA_D:Other:Other:-	0.780776	0.0512072	0			chr2	220177359	220178727	LTR12C:LTR:ERV1:+	0.0107218	0.00346021	0.304761
chr12	18008502	18014499	L1PA2:LINE:L1:+	0.792425	0.633615	0.275758			chr7	77162220	77164102	SVA_D:Other:Other:-	0.238529	0.0470517	0.140765			chr2	225467432	225468983	LTR12C:LTR:ERV1:-	0.264892	0.0746898	0.164865
chr12	23223570	23229586	L1PA2:LINE:L1:-	0.917757	0.861579	0.699735			chr7	87894795	87896742	SVA_D:Other:Other:-	0.509138	0.0746151	0.162821			chr2	226093265	226094731	LTR12C:LTR:ERV1:-	0.118954	0.0658757	0.0963455
chr12	42066254	42072269	L1PA2:LINE:L1:+	0.827526	0.858998	0.713302			chr7	99023774	99025740	SVA_D:Other:Other:+	0.947222	0.90332	0.136742			chr2	226608661	226610095	LTR12C:LTR:ERV1:+	0.324271	0.239764	0.240141
chr12	46814727	46820861	L1PA2:LINE:L1:-	0.918853	0.940323	0.781955			chr7	99484931	99486888	SVA_D:Other:Other:-	0.27468	0.0637413	0.426869			chr2	227512540	227514039	LTR12C:LTR:ERV1:+	0.926634	0.91175	0.602999
chr12	58040262	58046281	L1PA2:LINE:L1:+	0.773682	0.826992	0.373862			chr7	112561993	112563526	SVA_D:Other:Other:+	0.934156	0.950596	0.462722			chr2	228185168	228187002	LTR12C:LTR:ERV1:+	0.895451	0.881554	0.503407
chr12	64681129	64687157	L1PA2:LINE:L1:-	0.857829	0.632943	0			chr7	128216063	128217799	SVA_D:Other:Other:-	0.959525	0.793053	0.192162			chr2	230715252	230716658	LTR12C:LTR:ERV1:+	0.359337	0.431024	0.104025
chr12	68293988	68300004	L1PA2:LINE:L1:+	0.862988	0.814666	0.464206			chr7	132861693	132863088	SVA_D:Other:Other:+	0.378628	0.0338993	0.527571			chr2	231828094	231829522	LTR12C:LTR:ERV1:-	0.17662	0.12654	0.812721
chr12	70406845	70412860	L1PA2:LINE:L1:+	0.782467	0.671735	0.243105			chr7	139204121	139205837	SVA_D:Other:Other:-	0.134154	0.0458204	0.0727243			chr2	234931870	234933493	LTR12C:LTR:ERV1:-	0.446	0.251627	0.770338
chr12	71511852	71517883	L1PA2:LINE:L1:+	0.558945	0.369602	0.025641			chr7	153011131	153013316	SVA_D:Other:Other:-	0.920062	0.640447	0.642875			chr2	235156149	235157423	LTR12C:LTR:ERV1:+	0.19803	0.1657	0.606441
chr12	79433401	79439425	L1PA2:LINE:L1:-	0.803189	0.672249	0.12433			chr8	57933761	57935734	SVA_D:Other:Other:+	0.410227	0.0837893	0.422649			chr2	238965827	238967064	LTR12C:LTR:ERV1:-	0.249894	0.480909	0.553886
chr12	83978045	83984024	L1PA2:LINE:L1:+	0.687281	0.559295	0.509982			chr8	142211666	142213293	SVA_D:Other:Other:-	0.949681	0.611639	0.0131579			chr2	241477522	241478987	LTR12C:LTR:ERV1:+	0.545147	0.343062	0.518728
chr12	96709720	96715749	L1PA2:LINE:L1:+	0.925184	0.872661	0.0533333			chr8	5582261	5583743	SVA_D:Other:Other:+	0.80662	0.387355	0.274898			chr3	56752779	56754246	LTR12C:LTR:ERV1:+	0.928475	0.907471	0.333107
chr12	102701559	102707546	L1PA2:LINE:L1:-	0.804509	0.782964	0.158516			chr8	21569194	21570568	SVA_D:Other:Other:-	0.884155	0.434414	0.399464			chr3	87424296	87425618	LTR12C:LTR:ERV1:+	0.203321	0.180933	0.489896
chr12	103220955	103226986	L1PA2:LINE:L1:-	0.584925	0.60832	0.131293			chr8	33515055	33516771	SVA_D:Other:Other:-	0.94654	0.81306	0.558943			chr3	2125133	2126768	LTR12C:LTR:ERV1:+	0.230263	0.171101	0.0676479
chr13	19677852	19683864	L1PA2:LINE:L1:-	0.847002	0.796779	0.217956			chr8	37784600	37786231	SVA_D:Other:Other:+	0.780481	0.266217	0.107586			chr3	2393903	2395392	LTR12C:LTR:ERV1:+	0.916412	0.860571	0.808065
chr13	37724089	37730119	L1PA2:LINE:L1:-	0.825492	0.668723	0.397421			chr8	42793876	42795676	SVA_D:Other:Other:-	0.911359	0.85433	0.574214			chr3	2526415	2528043	LTR12C:LTR:ERV1:+	0.572779	0.378449	0.803182
chr13	40930427	40936458	L1PA2:LINE:L1:+	0.528609	0.558655	0.352875			chr8	42887538	42889170	SVA_D:Other:Other:-	0.513704	0.100775	0.18533			chr3	7610110	7611659	LTR12C:LTR:ERV1:+	0.931099	0.857635	0.851305
chr13	41309055	41315081	L1PA2:LINE:L1:+	0.884456	0.90063	0.119724			chr8	43273772	43275680	SVA_D:Other:Other:-	0.663237	0.679616	0.610941			chr3	10177283	10178614	LTR12C:LTR:ERV1:-	0.835043	0.5542	0.666962
chr13	41402955	41408962	L1PA2:LINE:L1:+	0.890088	0.938111	0.598413			chr8	52070966	52072762	SVA_D:Other:Other:+	0.238827	0.100896	0.216112			chr3	11102894	11104266	LTR12C:LTR:ERV1:+	0.165668	0.0961302	0.191242
chr13	46219165	46225202	L1PA2:LINE:L1:+	0.86389	0.799595	0.409341			chr8	57183941	57185581	SVA_D:Other:Other:-	0.802555	0.61412	0.468034			chr3	11111809	11113464	LTR12C:LTR:ERV1:-	0.876697	0.883798	0.659721
chr13	48356023	48362047	L1PA2:LINE:L1:+	0.797007	0.835102	0.766019			chr8	57983370	57984835	SVA_D:Other:Other:-	0.419834	0.0566594	0.109751			chr3	11135539	11136996	LTR12C:LTR:ERV1:+	0.0591543	0.00631868	0.396173
chr13	49726649	49732671	L1PA2:LINE:L1:-	0.892986	0.891039	0.574008			chr8	59588379	59589853	SVA_D:Other:Other:-	0.598001	0.0712155	0			chr3	11552348	11553634	LTR12C:LTR:ERV1:-	0.901522	0.889045	0.594643
chr13	50754431	50760466	L1PA2:LINE:L1:-	0.836099	0.777913	0.22			chr8	64091778	64093543	SVA_D:Other:Other:-	0.937	0.937693	0.0111111			chr3	11553986	11555282	LTR12C:LTR:ERV1:-	0.938576	0.878369	0.518761
chr13	51556190	51562206	L1PA2:LINE:L1:+	0.427252	0.350767	0.13648			chr8	66574289	66575782	SVA_D:Other:Other:+	0.23561	0.06288	0.0768185			chr3	12924206	12925478	LTR12C:LTR:ERV1:+	0.0282458	0.0497169	0.139229
chr13	52843775	52849794	L1PA2:LINE:L1:-	0.750156	0.615103	0.0507937			chr8	67143863	67145689	SVA_D:Other:Other:+	0.486448	0.0453822	0.393879			chr3	13221072	13222474	LTR12C:LTR:ERV1:+	0.963185	0.957915	0.653644
chr13	59246751	59252777	L1PA2:LINE:L1:-	0.855773	0.758061	0.540981			chr8	70157208	70159111	SVA_D:Other:Other:+	0.816467	0.327858	0.350611			chr3	13487715	13489261	LTR12C:LTR:ERV1:-	0.416889	0.175495	0.209704
chr13	67311614	67317639	L1PA2:LINE:L1:+	0.864759	0.809968	0.222364			chr8	87705690	87707570	SVA_D:Other:Other:-	0.477189	0.146792	0.676792			chr3	14069820	14071556	LTR12C:LTR:ERV1:-	0.881507	0.885815	0.686742
chr13	68254379	68260420	L1PA2:LINE:L1:-	0.525573	0.386985	0.0897436			chr8	90710428	90712376	SVA_D:Other:Other:+	0.708898	0.110818	0.202836			chr3	14078524	14079956	LTR12C:LTR:ERV1:+	0.86881	0.839091	0.826151
chr13	74214664	74220688	L1PA2:LINE:L1:+	0.875898	0.786811	0.268105			chr8	94050857	94052455	SVA_D:Other:Other:+	0.0452807	0.161692	0.294141			chr3	14334538	14336214	LTR12C:LTR:ERV1:+	0.462255	0.553854	0.194866
chr13	82619484	82625543	L1PA2:LINE:L1:+	0.896238	0.84195	0.488095			chr8	125443552	125445127	SVA_D:Other:Other:-	0.932631	0.286661	0.235043			chr3	16815041	16816592	LTR12C:LTR:ERV1:+	0.853043	0.852117	0.761199
chr13	85697339	85703356	L1PA2:LINE:L1:+	0.896582	0.89817	0.12619			chr9	6622268	6623631	SVA_D:Other:Other:+	0.790742	0.194186	0.1963			chr3	17858066	17859742	LTR12C:LTR:ERV1:-	0.942021	0.813121	0.733294
chr13	89740139	89746172	L1PA2:LINE:L1:+	0.867436	0.720264	0.147409			chr9	6798252	6799617	SVA_D:Other:Other:-	0.929243	0.636919	0.135022			chr3	19275222	19276297	LTR12C:LTR:ERV1:-	0.148822	0.105383	0.077422
chr13	108573004	108579054	L1PA2:LINE:L1:-	0.883823	0.838836	0.391786			chr9	15233321	15235035	SVA_D:Other:Other:+	0.240548	0.108174	0.102912			chr3	19743891	19745264	LTR12C:LTR:ERV1:+	0.0940441	0.0899874	0.0660364
chr14	41678541	41684561	L1PA2:LINE:L1:-	0.861801	0.868353	0.747475			chr9	16976740	16978368	SVA_D:Other:Other:-	0.766559	0.204881	0.136766			chr3	21312391	21313666	LTR12C:LTR:ERV1:-	0.6251	0.555527	0.64401
chr14	27098474	27104505	L1PA2:LINE:L1:-	0.862842	0.775195	0.198413			chr9	19433151	19434757	SVA_D:Other:Other:-	0.767377	0.245853	0.0698413			chr3	21427614	21429256	LTR12C:LTR:ERV1:-	0.831728	0.810779	0.533595
chr14	28657648	28663676	L1PA2:LINE:L1:+	0.772482	0.713882	0.00909091			chr9	29188015	29190063	SVA_D:Other:Other:-	0.111181	0.0442469	0.0798128			chr3	22458268	22459958	LTR12C:LTR:ERV1:+	0.851581	0.741365	0.842212
chr14	37820123	37826138	L1PA2:LINE:L1:-	0.833845	0.857535	0.600794			chr9	33600248	33601835	SVA_D:Other:Other:+	0.879679	0.57551	0.0766213			chr3	23312651	23314050	LTR12C:LTR:ERV1:-	0.928216	0.951103	0.673347
chr14	43839472	43845498	L1PA2:LINE:L1:+	0.858524	0.778525	0.18922			chr9	34136812	34138764	SVA_D:Other:Other:+	0.446611	0.0151504	0.0583333			chr3	23923190	23924580	LTR12C:LTR:ERV1:-	0.626986	0.573777	0.344473
chr14	57578928	57584932	L1PA2:LINE:L1:+	0.76821	0.697205	0.295455			chr9	34936033	34937661	SVA_D:Other:Other:+	0.809032	0.218054	0.0815986			chr3	25893081	25894512	LTR12C:LTR:ERV1:+	0.0557732	0.0398134	0.697642
chr14	86571803	86577838	L1PA2:LINE:L1:-	0.824965	0.828542	0.606886			chr9	76811726	76813550	SVA_D:Other:Other:+	0.870718	0.529455	0.337946			chr3	28240928	28242469	LTR12C:LTR:ERV1:-	0.11024	0.0191939	0.225681
chr14	92106588	92112577	L1PA2:LINE:L1:-	0.70458	0.556234	0.131746			chr9	79569745	79571201	SVA_D:Other:Other:+	0.749187	0.0974114	0.0566709			chr3	28943788	28945212	LTR12C:LTR:ERV1:-	0.842727	0.795451	0.767569
chr14	101732536	101738564	L1PA2:LINE:L1:+	0.892103	0.844922	0.699802			chr9	79675073	79676561	SVA_D:Other:Other:-	0.767108	0.158419	0.0404971			chr3	29513956	29515558	LTR12C:LTR:ERV1:-	0.828587	0.489091	0.724846
chr15	20516283	20522304	L1PA2:LINE:L1:+	0.857987	0.863632	0.605714			chr9	86418137	86420398	SVA_D:Other:Other:+	0.91538	0.815344	0.0950476			chr3	29742893	29744421	LTR12C:LTR:ERV1:+	0.340056	0.253882	0.618072
chr15	37691672	37697677	L1PA2:LINE:L1:-	0.88458	0.887894	0.612782			chr9	88187986	88189399	SVA_D:Other:Other:+	0.880016	0.87384	0.106012			chr3	31911430	31913015	LTR12C:LTR:ERV1:+	0.384569	0.465018	0.403639
chr15	49646430	49652449	L1PA2:LINE:L1:+	0.793279	0.83619	0.587348			chr9	88926480	88928041	SVA_D:Other:Other:+	0.91337	0.836021	0.114167			chr3	32620071	32621342	LTR12C:LTR:ERV1:+	0.0395537	0.0157778	0.287222
chr15	49688180	49694211	L1PA2:LINE:L1:+	0.893612	0.872192	0.224306			chr9	100558225	100559934	SVA_D:Other:Other:+	0.923283	0.164162	0.25034			chr3	32944103	32945867	LTR12C:LTR:ERV1:+	0.162281	0.0260381	0.0402299
chr15	53427639	53433672	L1PA2:LINE:L1:-	0.768921	0.666445	0.340842			chr9	102829438	102831589	SVA_D:Other:Other:+	0.606028	0.105556	0.153163			chr3	32980992	32982647	LTR12C:LTR:ERV1:+	0.155213	0.0480679	0.300472
chr15	55356191	55362189	L1PA2:LINE:L1:+	0.901401	0.836887	0.673016			chr9	112859254	112860461	SVA_D:Other:Other:-	0.966976	0.764749	0.225397			chr3	33494768	33496479	LTR12C:LTR:ERV1:+	0.923366	0.886824	0.858688
chr15	56426816	56432826	L1PA2:LINE:L1:-	0.927541	0.877161	0.598719			chr9	119602162	119603649	SVA_D:Other:Other:-	0.293981	0.0996019	0.0707757			chr3	35029672	35031270	LTR12C:LTR:ERV1:+	0.445402	0.248581	0.232011
chr15	71466478	71472491	L1PA2:LINE:L1:+	0.550412	0.429779	0.193271			chr9	123066663	123068090	SVA_D:Other:Other:+	0.720849	0.0943577	0.105017			chr3	36494652	36496043	LTR12C:LTR:ERV1:+	0.150384	0.196416	0.0912281
chr15	73800786	73806811	L1PA2:LINE:L1:-	0.881299	0.823331	0.148532			chr9	125473049	125474222	SVA_D:Other:Other:+	0.936258	0.712562	0.128747			chr3	36675215	36677078	LTR12C:LTR:ERV1:+	0.425941	0.339314	0.0346542
chr15	81989506	81995515	L1PA2:LINE:L1:+	0.905329	0.880285	0.535859			chr9	125613736	125615676	SVA_D:Other:Other:+	0.899803	0.760265	0.0558191			chr3	37274312	37275759	LTR12C:LTR:ERV1:+	0.306149	0.156407	0.0633333
chr15	82022621	82028649	L1PA2:LINE:L1:+	0.935737	0.909483	0.659809			chr9	125818760	125820365	SVA_D:Other:Other:-	0.916856	0.912823	0.0339027			chr3	38992459	38993717	LTR12C:LTR:ERV1:+	0.265259	0.231435	0.0199457
chr15	82090271	82096304	L1PA2:LINE:L1:+	0.633374	0.575628	0.139955			chr9	128220494	128222152	SVA_D:Other:Other:-	0.146004	0.0592613	0.398733			chr3	39754624	39756171	LTR12C:LTR:ERV1:+	0.187887	0.053895	0.556475
chr15	82163008	82169040	L1PA2:LINE:L1:+	0.909706	0.819811	0.155505			chr9	128338758	128340720	SVA_D:Other:Other:+	0.931727	0.449983	0.45212			chr3	40118466	40119974	LTR12C:LTR:ERV1:-	0.308484	0.374944	0.369437
chr15	82287507	82293537	L1PA2:LINE:L1:+	0.910392	0.810044	0.115619			chr9	131541763	131543445	SVA_D:Other:Other:+	0.63455	0.0776262	0.107982			chr3	41884835	41886221	LTR12C:LTR:ERV1:-	0.902638	0.889056	0.860424
chr15	84052403	84058368	L1PA2:LINE:L1:+	0.837083	0.597042	0.0955908			chr9	134782583	134784278	SVA_D:Other:Other:+	0.881993	0.857807	0.0783958			chr3	42811021	42812514	LTR12C:LTR:ERV1:+	0.666893	0.520197	0.585849
chr15	87071325	87077356	L1PA2:LINE:L1:+	0.713209	0.599457	0.208889			chrX	12980723	12982554	SVA_D:Other:Other:+	0.91459	0.0643236	0.100752			chr3	43696681	43698482	LTR12C:LTR:ERV1:-	0.837284	0.676769	0.378022
chr15	94218628	94224657	L1PA2:LINE:L1:+	0.749228	0.54486	0.0417367			chrX	30771476	30772893	SVA_D:Other:Other:-	0.954333	0.796861	0.0439815			chr3	45026813	45028153	LTR12C:LTR:ERV1:-	0.959994	0.968527	0.928364
chr15	97808810	97814834	L1PA2:LINE:L1:-	0.728549	0.890049	0.305495			chrX	41470975	41472901	SVA_D:Other:Other:+	0.754017	0.1644	0.05625			chr3	45347977	45349570	LTR12C:LTR:ERV1:+	0.0721432	0.0788116	0.614846
chr15	100957276	100963301	L1PA2:LINE:L1:+	0.831974	0.710266	0.252778			chrX	54154909	54156495	SVA_D:Other:Other:-	0.863397	0.303815	0			chr3	47928512	47930183	LTR12C:LTR:ERV1:+	0.627446	0.621012	0.260195
chr16	47841886	47848017	L1PA2:LINE:L1:-	0.878417	0.890482	0.611442			chrX	62612275	62614049	SVA_D:Other:Other:+	0.567364	0.382183	0.49482			chr3	48312395	48313969	LTR12C:LTR:ERV1:-	0.629149	0.810752	0.279923
chr16	59593167	59599223	L1PA2:LINE:L1:-	0.834125	0.78466	0.315327			chrX	70560526	70562436	SVA_D:Other:Other:-	0.806936	0.233847	0.022619			chr3	49219229	49220612	LTR12C:LTR:ERV1:-	0.37954	0.142206	0.797732
chr16	60010505	60016523	L1PA2:LINE:L1:+	0.775656	0.767519	0.720238			chrX	70671329	70672966	SVA_D:Other:Other:-	0.927157	0.908246	0.177466			chr3	49250001	49251427	LTR12C:LTR:ERV1:-	0.938741	0.948143	0.715688
chr16	61815982	61822005	L1PA2:LINE:L1:+	0.883295	0.867083	0.224242			chrX	73787741	73789694	SVA_D:Other:Other:-	0.157986	0.0335577	0.0371032			chr3	52024389	52025642	LTR12C:LTR:ERV1:+	0.238174	0.223554	0.0127962
chr16	61835359	61841393	L1PA2:LINE:L1:+	0.936938	0.931323	0.17381			chrX	77186509	77188447	SVA_D:Other:Other:-	0.717884	0.107306	0.0181973			chr3	56725724	56727051	LTR12C:LTR:ERV1:+	0.368282	0.479664	0.159783
chr16	75855857	75861879	L1PA2:LINE:L1:-	0.89057	0.843195	0.416694			chrX	79845908	79847758	SVA_D:Other:Other:+	0.776902	0.272043	0.663988			chr3	56968311	56969859	LTR12C:LTR:ERV1:+	0.558183	0.680265	0.35636
chr17	25426190	25432202	L1PA2:LINE:L1:-	0.641737	0.670802	0.199385			chrX	99978129	99979868	SVA_D:Other:Other:+	0.647922	0.276404	0.0973085			chr3	57046737	57048366	LTR12C:LTR:ERV1:+	0.879125	0.898488	0.659782
chr17	3229848	3236020	L1PA2:LINE:L1:-	0.835151	0.90509	0.706825			chrX	122867343	122868845	SVA_D:Other:Other:+	0.276936	0.0323632	0.02			chr3	57433841	57435638	LTR12C:LTR:ERV1:-	0.335462	0.239834	0.289492
chr17	25366695	25372649	L1PA2:LINE:L1:-	0.615241	0.611761	0.337434			chrX	133972690	133974403	SVA_D:Other:Other:+	0.787518	0.179082	0.0181818			chr3	59036401	59037789	LTR12C:LTR:ERV1:+	0.3661	0.299781	0.130605
chr17	31005275	31011290	L1PA2:LINE:L1:-	0.665959	0.501204	0.255914			chrX	134093737	134095193	SVA_D:Other:Other:+	0.838705	0.294742	0.0172043			chr3	66594192	66595636	LTR12C:LTR:ERV1:-	0.234115	0.0814443	0.442822
chr17	39357119	39363152	L1PA2:LINE:L1:-	0.753308	0.698616	0.436905			chrX	144517101	144518660	SVA_D:Other:Other:+	0.845657	0.358335	0.447985			chr3	66701812	66703195	LTR12C:LTR:ERV1:+	0.180478	0.0572228	0.330711
chr17	59187590	59193599	L1PA2:LINE:L1:+	0.912054	0.878644	0.523479			chr10	6247937	6249389	SVA_D:Other:Other:-	0.913796	0.685523	0.180011			chr3	68833426	68834992	LTR12C:LTR:ERV1:-	0.254482	0.180159	0.54198
chr18	1516190	1522241	L1PA2:LINE:L1:-	0.882231	0.902532	0.380655			chr10	8910328	8911876	SVA_D:Other:Other:+	0.520772	0.107886	0.0253205			chr3	69309244	69310526	LTR12C:LTR:ERV1:+	0.136733	0.172391	0.484988
chr18	2247167	2253196	L1PA2:LINE:L1:+	0.926162	0.917311	0.0645022			chr10	12564195	12565789	SVA_D:Other:Other:-	0.893028	0.691248	0.587619			chr3	69503414	69504841	LTR12C:LTR:ERV1:+	0.793029	0.732125	0.659309
chr18	10572665	10578675	L1PA2:LINE:L1:-	0.906221	0.869787	0.790135			chr10	29984904	29986738	SVA_D:Other:Other:+	0.0987841	0.0215407	0.0465686			chr3	69709644	69710868	LTR12C:LTR:ERV1:+	0.0674033	0.0808943	0.582152
chr18	20109599	20115627	L1PA2:LINE:L1:+	0.688933	0.594851	0.234727			chr10	42632959	42634451	SVA_D:Other:Other:+	0.470779	0.441338	0.494208			chr3	69726424	69728080	LTR12C:LTR:ERV1:+	0.0616801	0.0415961	0
chr18	25089972	25095990	L1PA2:LINE:L1:+	0.797649	0.708318	0.146032			chr10	43342118	43343771	SVA_D:Other:Other:+	0.506085	0.0579274	0.288244			chr3	70660833	70662360	LTR12C:LTR:ERV1:+	0.614872	0.563262	0.616387
chr18	25317679	25323714	L1PA2:LINE:L1:-	0.826851	0.774731	0.107792			chr10	43959830	43961629	SVA_D:Other:Other:-	0.918741	0.369123	0.0988473			chr3	71380101	71381632	LTR12C:LTR:ERV1:+	0.921027	0.893211	0.570376
chr18	31911079	31917100	L1PA2:LINE:L1:+	0.504645	0.403849	0.114006			chr10	45754728	45756436	SVA_D:Other:Other:+	0.768452	0.0877499	0.213075			chr3	73318160	73319443	LTR12C:LTR:ERV1:+	0.117378	0.0507361	0.250714
chr18	32132342	32138359	L1PA2:LINE:L1:-	0.915902	0.947297	0.60619			chr10	45825527	45826408	SVA_D:Other:Other:-	0.64038	0.350829	0.0969697			chr3	74948260	74949650	LTR12C:LTR:ERV1:-	0.236321	0.0940517	0.0526984
chr18	37145556	37151598	L1PA2:LINE:L1:+	0.885257	0.827242	0.302778			chr10	45886501	45888172	SVA_D:Other:Other:+	0.843649	0.834197	0.401584			chr3	75033191	75034841	LTR12C:LTR:ERV1:-	0.785712	0.568305	0.330601
chr18	37504333	37510398	L1PA2:LINE:L1:+	0.725185	0.618205	0.203741			chr10	46006863	46008669	SVA_D:Other:Other:+	0.858932	0.191929	0.199415			chr3	77288231	77289791	LTR12C:LTR:ERV1:-	0.653147	0.546276	0.605411
chr18	37767603	37773621	L1PA2:LINE:L1:-	0.916942	0.856621	0.138528			chr10	61455824	61457495	SVA_D:Other:Other:+	0.200179	0.00504299	0			chr3	78157358	78158788	LTR12C:LTR:ERV1:+	0.398133	0.112917	0.580384
chr18	39211706	39217733	L1PA2:LINE:L1:+	0.62787	0.581129	0.102801			chr10	69450615	69452514	SVA_D:Other:Other:+	0.902779	0.876113	0.195977			chr3	79222305	79223681	LTR12C:LTR:ERV1:+	0.537507	0.225768	0.69053
chr18	53382715	53388760	L1PA2:LINE:L1:-	0.603838	0.493036	0.253896			chr10	72390223	72391763	SVA_D:Other:Other:+	0.399555	0.0653569	0.18403			chr3	79349189	79350497	LTR12C:LTR:ERV1:+	0.133647	0.0392681	0.484364
chr19	24073247	24079257	L1PA2:LINE:L1:-	0.783552	0.822751	0.567063			chr10	73628415	73630264	SVA_D:Other:Other:-	0.485406	0.0628245	0.227513			chr3	79551223	79552615	LTR12C:LTR:ERV1:+	0.246321	0.0949834	0.278704
chr19	24576841	24582745	L1PA2:LINE:L1:+	0.333939	0.315253	0.295268			chr10	73634921	73636503	SVA_D:Other:Other:-	0.815577	0.196462	0.0355638			chr3	80363470	80364851	LTR12C:LTR:ERV1:+	0.47185	0.157962	0.368859
chr20	110605	116651	L1PA2:LINE:L1:+	0.874301	0.850819	0.256602			chr10	75448716	75450383	SVA_D:Other:Other:+	0.854255	0.202563	0.0710896			chr3	81815646	81817101	LTR12C:LTR:ERV1:-	0.431864	0.2713	0.178286
chr20	6296468	6302491	L1PA2:LINE:L1:-	0.801283	0.764013	0.175964			chr10	80227713	80229497	SVA_D:Other:Other:-	0.907151	0.875859	0.157814			chr3	81860292	81861699	LTR12C:LTR:ERV1:-	0.2424	0.114548	0.437351
chr20	12563154	12569178	L1PA2:LINE:L1:+	0.899698	0.888995	0.703912			chr10	88839662	88841720	SVA_D:Other:Other:+	0.823028	0.283739	0.0470506			chr3	82764306	82765728	LTR12C:LTR:ERV1:+	0.340408	0.131591	0.0344828
chr20	21868293	21874323	L1PA2:LINE:L1:+	0.855901	0.788766	0.31599			chr10	93082267	93084025	SVA_D:Other:Other:-	0.789632	0.226098	0.463216			chr3	85181987	85183575	LTR12C:LTR:ERV1:-	0.118104	0.0765903	0.0414747
chr20	23569945	23575948	L1PA2:LINE:L1:+	0.716588	0.736765	0			chr10	94734301	94736426	SVA_D:Other:Other:+	0.397826	0.0278974	0.0135802			chr3	85553174	85554389	LTR12C:LTR:ERV1:-	0.0244194	0.0474221	0.059127
chr20	24881241	24887254	L1PA2:LINE:L1:+	0.778632	0.754918	0.6347			chr10	95729820	95731384	SVA_D:Other:Other:+	0.151738	0.0568783	0.0607474			chr3	86331217	86332767	LTR12C:LTR:ERV1:+	0.0444469	0.0328653	0.396345
chr20	40834909	40840957	L1PA2:LINE:L1:+	0.786236	0.761981	0.0714286			chr10	99287232	99289549	SVA_D:Other:Other:-	0.900767	0.419967	0.145615			chr3	86779832	86781142	LTR12C:LTR:ERV1:-	0.911979	0.909681	0.786853
chr20	52120390	52126413	L1PA2:LINE:L1:+	0.783859	0.625624	0.234444			chr10	99600726	99602222	SVA_D:Other:Other:+	0.58146	0.081117	0.0850459			chr3	86806560	86807991	LTR12C:LTR:ERV1:+	0.187889	0.0197583	0.0559006
chr21	18748357	18754249	L1PA2:LINE:L1:+	0.770796	0.70387	0.343254			chr10	105366217	105367927	SVA_D:Other:Other:+	0.918325	0.832374	0.108376			chr3	87728067	87729600	LTR12C:LTR:ERV1:+	0.398891	0.257383	0.284399
chr21	27290679	27296704	L1PA2:LINE:L1:+	0.843151	0.881937	0.434881			chr10	112526083	112528030	SVA_D:Other:Other:-	0.49923	0.365079	0.189312			chr3	88064656	88066037	LTR12C:LTR:ERV1:+	0.0939477	0.0789472	0.364188
chr21	35297926	35303910	L1PA2:LINE:L1:-	0.592113	0.568986	0.05			chr10	120940813	120942736	SVA_D:Other:Other:-	0.881476	0.442369	0.0461538			chr3	93636275	93637512	LTR12C:LTR:ERV1:+	0.394353	0.305285	0.655137
chr21	41394801	41400769	L1PA2:LINE:L1:-	0.91068	0.862213	0.356446			chr10	121019923	121021456	SVA_D:Other:Other:-	0.743944	0.0507093	0.0185185			chr3	95306374	95307934	LTR12C:LTR:ERV1:-	0.919321	0.858012	0.6681
chr21	41405088	41411107	L1PA2:LINE:L1:+	0.394412	0.406753	0.160831			chr10	121553537	121555624	SVA_D:Other:Other:-	0.905937	0.699072	0.063933			chr3	98575794	98577334	LTR12C:LTR:ERV1:-	0.920477	0.871436	0.839052
									chr10	123962173	123963720	SVA_D:Other:Other:-	0.75357	0.253579	0.0785248			chr3	104624897	104626253	LTR12C:LTR:ERV1:+	0.951809	0.888806	0.662698
									chr10	127206303	127207745	SVA_D:Other:Other:+	0.387776	0.0655201	0.33291			chr3	105867291	105868885	LTR12C:LTR:ERV1:+	0.944647	0.939853	0.679072
									chr10	135227418	135228718	SVA_D:Other:Other:-	0.956415	0.896152	0.564205			chr3	113955987	113957703	LTR12C:LTR:ERV1:-	0.0880664	0.0147703	0.494568
									chr11	18141977	18143565	SVA_D:Other:Other:+	0.623987	0.059842	0.025641			chr3	114530703	114532066	LTR12C:LTR:ERV1:-	0.0336594	0.0463059	0.0208333
									chr11	19880685	19882618	SVA_D:Other:Other:-	0.379511	0.0681884	0.0295455			chr3	114903030	114904294	LTR12C:LTR:ERV1:-	0.819283	0.487659	0.0740869
									chr11	34007128	34008566	SVA_D:Other:Other:+	0.902666	0.644376	0.0943947			chr3	117890071	117891732	LTR12C:LTR:ERV1:+	0.428937	0.288165	0.34724
									chr11	36165451	36167571	SVA_D:Other:Other:+	0.177003	0.0571342	0.248086			chr3	117988343	117989742	LTR12C:LTR:ERV1:+	0.361985	0.093625	0.719311
									chr11	57483053	57485225	SVA_D:Other:Other:-	0.874557	0.686484	0.0226667			chr3	118791260	118792811	LTR12C:LTR:ERV1:-	0.924463	0.878678	0.842434
									chr11	59466491	59468034	SVA_D:Other:Other:+	0.785575	0.0486202	0.255539			chr3	119858921	119860539	LTR12C:LTR:ERV1:+	0.40181	0.300774	0.0771626
									chr11	60933229	60934781	SVA_D:Other:Other:-	0.925039	0.397976	0.031746			chr3	120008379	120009909	LTR12C:LTR:ERV1:+	0.939767	0.922142	0.594334
									chr11	65529662	65531199	SVA_D:Other:Other:-	0.784655	0.176828	0.0949295			chr3	120796126	120797965	LTR12C:LTR:ERV1:-	0.803281	0.785861	0.686296
									chr11	68628279	68629804	SVA_D:Other:Other:+	0.849106	0.121927	0.0208551			chr3	121944942	121946587	LTR12C:LTR:ERV1:-	0.95351	0.933741	0.835411
									chr11	70140656	70142847	SVA_D:Other:Other:-	0.939458	0.852618	0			chr3	125390345	125391795	LTR12C:LTR:ERV1:+	0.461111	0.0822169	0.614045
									chr11	73282257	73283918	SVA_D:Other:Other:+	0.872023	0.819613	0.0659279			chr3	125476593	125477987	LTR12C:LTR:ERV1:-	0.269769	0.224117	0.339206
									chr11	73607342	73609277	SVA_D:Other:Other:-	0.838167	0.145098	0.0323696			chr3	125622600	125623867	LTR12C:LTR:ERV1:+	0.485461	0.617039	0.637312
									chr11	73646654	73648767	SVA_D:Other:Other:-	0.825678	0.252443	0.225475			chr3	126765336	126766884	LTR12C:LTR:ERV1:+	0.530269	0.710634	0.243723
									chr11	73839612	73841174	SVA_D:Other:Other:-	0.622774	0.211099	0.0960181			chr3	126774080	126775513	LTR12C:LTR:ERV1:-	0.78684	0.765712	0.57873
									chr11	75587893	75589957	SVA_D:Other:Other:-	0.822349	0.297447	0.0133333			chr3	126794221	126795648	LTR12C:LTR:ERV1:-	0.902025	0.840336	0.534964
									chr11	76644325	76645786	SVA_D:Other:Other:-	0.940044	0.857404	0.769739			chr3	128372069	128373499	LTR12C:LTR:ERV1:+	0.0752751	0.236366	0.02
									chr11	78902178	78903812	SVA_D:Other:Other:+	0.113398	0.0532035	0.195238			chr3	128460799	128462322	LTR12C:LTR:ERV1:-	0.941017	0.922682	0.495079
									chr11	81892216	81893920	SVA_D:Other:Other:+	0.950027	0.670581	0.335863			chr3	128786382	128787687	LTR12C:LTR:ERV1:-	0.244587	0.184774	0.341944
									chr11	82843632	82845216	SVA_D:Other:Other:+	0.498082	0.149264	0.116377			chr3	129729299	129730697	LTR12C:LTR:ERV1:+	0.874016	0.854988	0.749664
									chr11	83026661	83028894	SVA_D:Other:Other:-	0.411765	0.0281315	0.531696			chr3	130264938	130266461	LTR12C:LTR:ERV1:-	0.700971	0.82183	0.3698
									chr11	86442570	86444195	SVA_D:Other:Other:+	0.793471	0.282421	0.196603			chr3	130532541	130534231	LTR12C:LTR:ERV1:-	0.566053	0.407758	0.583995
									chr11	90796048	90797650	SVA_D:Other:Other:+	0.343506	0.0394725	0.00252525			chr3	132885235	132886788	LTR12C:LTR:ERV1:-	0.906191	0.882975	0.780203
									chr11	91890028	91892084	SVA_D:Other:Other:+	0.420017	0.052562	0.210822			chr3	134634346	134635766	LTR12C:LTR:ERV1:-	0.935061	0.903671	0.920952
									chr11	95214942	95216586	SVA_D:Other:Other:+	0.836285	0.105128	0.548329			chr3	134757386	134758825	LTR12C:LTR:ERV1:-	0.78076	0.784344	0.407049
									chr11	107782496	107784211	SVA_D:Other:Other:+	0.214249	0.0831186	0.0428819			chr3	136608079	136609406	LTR12C:LTR:ERV1:-	0.894383	0.730265	0.172173
									chr11	111897051	111898675	SVA_D:Other:Other:-	0.882596	0.40805	0.109244			chr3	136705562	136706995	LTR12C:LTR:ERV1:-	0.214297	0.162879	0.384774
									chr11	129717302	129718401	SVA_D:Other:Other:-	0.910514	0.575349	0			chr3	137432524	137433901	LTR12C:LTR:ERV1:-	0.010224	0.0143973	0.449153
									chr12	1926627	1927951	SVA_D:Other:Other:+	0.877899	0.465496	0.102857			chr3	138203315	138204932	LTR12C:LTR:ERV1:+	0.907612	0.956025	0.631711
									chr12	7741774	7743805	SVA_D:Other:Other:-	0.389182	0.0452817	0.189469			chr3	140370082	140371634	LTR12C:LTR:ERV1:+	0.897341	0.886023	0.771138
									chr12	8335971	8337964	SVA_D:Other:Other:+	0.640313	0.0551461	0.108838			chr3	144468470	144470053	LTR12C:LTR:ERV1:+	0.460806	0.395965	0.169418
									chr12	12718330	12719858	SVA_D:Other:Other:+	0.812284	0.0898574	0.154053			chr3	144475553	144477081	LTR12C:LTR:ERV1:+	0.537849	0.268987	0.659897
									chr12	28026232	28027801	SVA_D:Other:Other:+	0.832893	0.195374	0.064599			chr3	145050997	145052300	LTR12C:LTR:ERV1:+	0.0169467	0.0138227	0.0411111
									chr12	28353234	28354936	SVA_D:Other:Other:-	0.925099	0.901109	0.47554			chr3	145942166	145943773	LTR12C:LTR:ERV1:-	0.186687	0.186166	0.205331
									chr12	32715348	32716995	SVA_D:Other:Other:-	0.889278	0.399581	0.0215686			chr3	146214911	146216304	LTR12C:LTR:ERV1:+	0.905804	0.834757	0.807776
									chr12	44078141	44080137	SVA_D:Other:Other:+	0.455461	0.044683	0.483853			chr3	146489950	146491313	LTR12C:LTR:ERV1:+	0.0272357	0	0.569535
									chr12	48893514	48895337	SVA_D:Other:Other:-	0.445724	0.0524611	0.527062			chr3	146871700	146873228	LTR12C:LTR:ERV1:+	0.90456	0.839722	0.724068
									chr12	49117809	49119365	SVA_D:Other:Other:+	0.921029	0.713359	0.0833333			chr3	146962693	146963906	LTR12C:LTR:ERV1:-	0.0379048	0.024168	0.034127
									chr12	49235221	49237100	SVA_D:Other:Other:+	0.900944	0.888731	0.0464646			chr3	147706292	147707733	LTR12C:LTR:ERV1:-	0.234527	0.134472	0.322126
									chr12	49308893	49310439	SVA_D:Other:Other:-	0.940631	0.7	0.1			chr3	147997569	147998867	LTR12C:LTR:ERV1:-	0.0112958	0.0325548	0.0817016
									chr12	50253991	50255763	SVA_D:Other:Other:+	0.652516	0.0578786	0.142167			chr3	148814639	148816201	LTR12C:LTR:ERV1:-	0.574653	0.572246	0.401966
									chr12	52802821	52804486	SVA_D:Other:Other:+	0.354774	0.0728294	0.356143			chr3	148827000	148828382	LTR12C:LTR:ERV1:+	0.929346	0.886199	0.708601
									chr12	54881264	54883083	SVA_D:Other:Other:-	0.498975	0.0997462	0.00769231			chr3	149001624	149002877	LTR12C:LTR:ERV1:+	0.442637	0.378835	0.231994
									chr12	57182240	57184386	SVA_D:Other:Other:-	0.612517	0.0602397	0.0350694			chr3	150040572	150041561	LTR12C:LTR:ERV1:+	0.171051	0.0933437	0.230736
									chr12	57900633	57902496	SVA_D:Other:Other:-	0.955749	0.710634	0.155758			chr3	151645760	151647257	LTR12C:LTR:ERV1:+	0.295977	0.188198	0.0539796
									chr12	64079903	64081381	SVA_D:Other:Other:+	0.22727	0.113409	0.10711			chr3	151870021	151871581	LTR12C:LTR:ERV1:+	0.0682424	0.0523819	0.1
									chr12	80700600	80702792	SVA_D:Other:Other:-	0.805206	0.306539	0.0272727			chr3	151934910	151936334	LTR12C:LTR:ERV1:+	0.899447	0.578932	0.65049
									chr12	95628462	95630244	SVA_D:Other:Other:-	0.860113	0.242586	0.0603175			chr3	152277064	152278155	LTR12C:LTR:ERV1:+	0.701464	0.73189	0.811858
									chr12	96300623	96302230	SVA_D:Other:Other:-	0.462642	0.0625	0			chr3	152872692	152874074	LTR12C:LTR:ERV1:-	0.128738	0.0822799	0.030303
									chr12	110610147	110611786	SVA_D:Other:Other:+	0.453325	0.12214	0.045084			chr3	153086673	153088104	LTR12C:LTR:ERV1:-	0.85833	0.830999	0.497004
									chr12	111387779	111389652	SVA_D:Other:Other:-	0.127264	0.0189933	0.30481			chr3	153095144	153096690	LTR12C:LTR:ERV1:-	0.640085	0.512387	0.37919
									chr12	111944433	111945974	SVA_D:Other:Other:+	0.934713	0.867178	0.119195			chr3	153805643	153807313	LTR12C:LTR:ERV1:+	0.919289	0.927869	0.656821
									chr12	119797341	119798997	SVA_D:Other:Other:-	0.703915	0.262076	0.392969			chr3	154606109	154607593	LTR12C:LTR:ERV1:-	0.204402	0.179684	0.147429
									chr12	121513114	121515417	SVA_D:Other:Other:+	0.197007	0.0598769	0.526491			chr3	155758926	155760339	LTR12C:LTR:ERV1:+	0.104606	0.0563984	0.248952
									chr12	122071618	122072660	SVA_D:Other:Other:-	0.931738	0.950705	0			chr3	155769394	155771296	LTR12C:LTR:ERV1:+	0.858763	0.850028	0.55849
									chr12	124585705	124587547	SVA_D:Other:Other:-	0.864838	0.68324	0.0708333			chr3	155790776	155792286	LTR12C:LTR:ERV1:+	0.566819	0.432132	0.230189
									chr12	132410289	132411662	SVA_D:Other:Other:-	0.529427	0.167101	0.0333333			chr3	155817074	155818450	LTR12C:LTR:ERV1:+	0.125739	0.0426433	0.115278
									chr13	19247425	19248904	SVA_D:Other:Other:+	0.303865	0.081799	0.0644444			chr3	155940790	155942278	LTR12C:LTR:ERV1:-	0.92005	0.66254	0.624829
									chr13	23432548	23434034	SVA_D:Other:Other:-	0.796153	0.245169	0.398152			chr3	156458183	156459561	LTR12C:LTR:ERV1:+	0.261204	0.263024	0.181016
									chr13	25543830	25545367	SVA_D:Other:Other:-	0.126154	0.0934227	0.180247			chr3	159778119	159779666	LTR12C:LTR:ERV1:+	0.181279	0.0327259	0.519734
									chr13	26086028	26088146	SVA_D:Other:Other:-	0.625843	0.225072	0.39596			chr3	160291009	160292297	LTR12C:LTR:ERV1:-	0.234619	0.109388	0.225702
									chr13	27297269	27298964	SVA_D:Other:Other:+	0.126053	0.0357841	0.0378571			chr3	162357676	162359117	LTR12C:LTR:ERV1:+	0.745263	0.275501	0.779449
									chr13	32573589	32575276	SVA_D:Other:Other:+	0.492816	0.188827	0.123274			chr3	162419637	162421272	LTR12C:LTR:ERV1:-	0.633417	0.400198	0.570143
									chr13	33289761	33291843	SVA_D:Other:Other:+	0.953225	0.865817	0.774883			chr3	162427325	162428863	LTR12C:LTR:ERV1:-	0.911739	0.796323	0.677778
									chr13	41528556	41530730	SVA_D:Other:Other:+	0.83825	0.492066	0.124542			chr3	162704956	162706268	LTR12C:LTR:ERV1:+	0.0881134	0.0258814	0.578798
									chr13	45255921	45257586	SVA_D:Other:Other:-	0.341983	0.0530564	0.426488			chr3	163216637	163218070	LTR12C:LTR:ERV1:+	0.0612262	0.0871429	0.15873
									chr13	51651255	51653059	SVA_D:Other:Other:+	0.93259	0.893557	0.539228			chr3	163269297	163270673	LTR12C:LTR:ERV1:-	0.33722	0.29456	0.0773611
									chr13	52637164	52639276	SVA_D:Other:Other:+	0.897557	0.473659	0.277733			chr3	163720574	163722014	LTR12C:LTR:ERV1:+	0.116527	0.042771	0.457689
									chr13	52653456	52655042	SVA_D:Other:Other:+	0.879416	0.404504	0.0460631			chr3	163896858	163898289	LTR12C:LTR:ERV1:+	0.64924	0.579705	0.766989
									chr13	88627862	88629770	SVA_D:Other:Other:-	0.246061	0.0130182	0.309176			chr3	164118901	164120264	LTR12C:LTR:ERV1:-	0.109717	0.0279521	0.0694444
									chr13	96342238	96344368	SVA_D:Other:Other:-	0.894624	0.641713	0.580714			chr3	165366345	165367669	LTR12C:LTR:ERV1:-	0.23353	0.135673	0.216719
									chr13	108434370	108436230	SVA_D:Other:Other:+	0.90266	0.499675	0.0125			chr3	165635518	165636798	LTR12C:LTR:ERV1:-	0.213945	0.116671	0.025641
									chr13	111258022	111259669	SVA_D:Other:Other:-	0.843451	0.0422275	0.133146			chr3	165641140	165642627	LTR12C:LTR:ERV1:-	0.602645	0.580017	0.231111
									chr14	77200342	77201857	SVA_D:Other:Other:-	0.925329	0.478438	0.225463			chr3	165975490	165976818	LTR12C:LTR:ERV1:-	0.0579194	0.0561271	0.105093
									chr14	20777468	20779452	SVA_D:Other:Other:+	0.83973	0.735336	0.069697			chr3	166560417	166561869	LTR12C:LTR:ERV1:+	0.562792	0.478356	0.39463
									chr14	21656417	21657641	SVA_D:Other:Other:+	0.508925	0.0681315	0.0271605			chr3	166693439	166694527	LTR12C:LTR:ERV1:+	0.0723068	0.0301042	0.0912972
									chr14	34880472	34882041	SVA_D:Other:Other:+	0.267001	0.0224694	0.296828			chr3	168497746	168499193	LTR12C:LTR:ERV1:+	0.504417	0.292996	0.621273
									chr14	36293177	36294838	SVA_D:Other:Other:-	0.179278	0.0144123	0.17			chr3	170045056	170046671	LTR12C:LTR:ERV1:+	0.684965	0.70402	0.555951
									chr14	38023856	38025731	SVA_D:Other:Other:-	0.768733	0.124999	0.550119			chr3	171463505	171465057	LTR12C:LTR:ERV1:+	0.592651	0.547064	0.651521
									chr14	50287337	50289001	SVA_D:Other:Other:+	0.926424	0.920939	0.136905			chr3	171623990	171625396	LTR12C:LTR:ERV1:-	0.91221	0.802127	0.481539
									chr14	59525014	59526436	SVA_D:Other:Other:-	0.810858	0.151546	0.0435897			chr3	171715950	171717227	LTR12C:LTR:ERV1:-	0.519851	0.43404	0.0877001
									chr14	63631518	63633556	SVA_D:Other:Other:+	0.373785	0.217804	0.570265			chr3	172584390	172585776	LTR12C:LTR:ERV1:+	0.0840534	0.105737	0.352461
									chr14	64503851	64505606	SVA_D:Other:Other:-	0.904627	0.612217	0.121474			chr3	173928710	173930327	LTR12C:LTR:ERV1:-	0.647922	0.456757	0.339819
									chr14	66099699	66101298	SVA_D:Other:Other:+	0.863071	0.168794	0.59499			chr3	175654980	175656466	LTR12C:LTR:ERV1:+	0.856387	0.877126	0.703527
									chr14	66158341	66160279	SVA_D:Other:Other:-	0.907031	0.445311	0.263896			chr3	176079114	176080580	LTR12C:LTR:ERV1:-	0.105572	0.033682	0.0357143
									chr14	67011299	67013541	SVA_D:Other:Other:-	0.871978	0.59133	0.385805			chr3	176920633	176922250	LTR12C:LTR:ERV1:-	0.893154	0.808184	0.685864
									chr14	67807385	67808898	SVA_D:Other:Other:+	0.921896	0.815459	0.0530021			chr3	176988483	176990079	LTR12C:LTR:ERV1:-	0.599572	0.0356894	0.233208
									chr14	76390632	76392402	SVA_D:Other:Other:-	0.801853	0.34355	0.125037			chr3	178980074	178981331	LTR12C:LTR:ERV1:-	0.0891704	0.075652	0.505844
									chr14	78459365	78460902	SVA_D:Other:Other:-	0.492987	0.0945352	0.222917			chr3	179492075	179493830	LTR12C:LTR:ERV1:-	0.932099	0.947069	0.728877
									chr14	80752364	80753977	SVA_D:Other:Other:+	0.784422	0.214061	0.472454			chr3	180899997	180901330	LTR12C:LTR:ERV1:-	0.147375	0.11784	0.715024
									chr14	83279997	83281667	SVA_D:Other:Other:-	0.149428	0.0252677	0.185931			chr3	182818502	182819893	LTR12C:LTR:ERV1:+	0.118	0.0287454	0.187685
									chr14	85818381	85819870	SVA_D:Other:Other:-	0.548645	0.0643968	0.564728			chr3	182820771	182822098	LTR12C:LTR:ERV1:-	0.0829052	0.0120968	0.0294214
									chr14	86295503	86297031	SVA_D:Other:Other:-	0.336752	0.0369522	0.0825397			chr3	187084691	187085922	LTR12C:LTR:ERV1:-	0.255577	0.0914492	0.384933
									chr14	89971591	89973486	SVA_D:Other:Other:+	0.846467	0.343107	0.141939			chr3	189313731	189314949	LTR12C:LTR:ERV1:+	0.177581	0.146929	0.429719
									chr14	92022874	92024752	SVA_D:Other:Other:-	0.830356	0.185526	0.475453			chr3	189893958	189895402	LTR12C:LTR:ERV1:-	0.271191	0.207034	0.117225
									chr14	100646600	100648282	SVA_D:Other:Other:+	0.793694	0.0799596	0.036525			chr3	191034012	191035344	LTR12C:LTR:ERV1:-	0.080581	0.0555932	0.109245
									chr14	100810398	100812012	SVA_D:Other:Other:+	0.881558	0.800432	0.113598			chr3	192506637	192507961	LTR12C:LTR:ERV1:+	0.0739226	0.0378268	0.0590439
									chr15	29094105	29095843	SVA_D:Other:Other:-	0.895988	0.305352	0.320547			chr3	196325075	196326471	LTR12C:LTR:ERV1:-	0.0448947	0.0276557	0.0942641
									chr15	41612454	41614115	SVA_D:Other:Other:+	0.946497	0.939746	0.00909091			chr4	67763908	67765733	LTR12C:LTR:ERV1:-	0.952679	0.88273	0.510317
									chr15	43306051	43307851	SVA_D:Other:Other:+	0.932194	0.70718	0.0997829			chr4	127794605	127796147	LTR12C:LTR:ERV1:-	0.898092	0.870705	0.740817
									chr15	43458752	43460315	SVA_D:Other:Other:-	0.917719	0.177171	0.26058			chr4	397040	398312	LTR12C:LTR:ERV1:-	0.927639	0.914671	0.725573
									chr15	45584609	45586200	SVA_D:Other:Other:-	0.728024	0.136688	0.196169			chr4	767163	768952	LTR12C:LTR:ERV1:+	0.889588	0.92122	0.71299
									chr15	49841523	49843453	SVA_D:Other:Other:-	0.95927	0.699952	0.623219			chr4	2162814	2164242	LTR12C:LTR:ERV1:+	0.317334	0.265846	0.186729
									chr15	50449924	50451308	SVA_D:Other:Other:+	0.892993	0.312396	0.401032			chr4	3965590	3966977	LTR12C:LTR:ERV1:-	0.268477	0.353986	0.183871
									chr15	52577644	52579153	SVA_D:Other:Other:+	0.800635	0.205385	0.0902898			chr4	4116943	4118342	LTR12C:LTR:ERV1:+	0.737378	0.740461	0.726524
									chr15	62623773	62625548	SVA_D:Other:Other:-	0.495259	0.0509908	0.0556713			chr4	6310052	6311321	LTR12C:LTR:ERV1:-	0.0164423	0.00708731	0.05
									chr15	63390454	63391984	SVA_D:Other:Other:+	0.86736	0.451478	0.190873			chr4	6674267	6675474	LTR12C:LTR:ERV1:+	0.0989082	0.048102	0.448994
									chr15	65090617	65092291	SVA_D:Other:Other:-	0.90341	0.188949	0			chr4	7216672	7217972	LTR12C:LTR:ERV1:+	0.228774	0.663326	0.5522
									chr15	69256014	69257899	SVA_D:Other:Other:-	0.821022	0.47854	0.460187			chr4	8491971	8493700	LTR12C:LTR:ERV1:-	0.873263	0.865228	0.369057
									chr15	72688142	72689984	SVA_D:Other:Other:+	0.282488	0.0742994	0.294631			chr4	9145129	9146517	LTR12C:LTR:ERV1:+	0.206065	0.310529	0.284283
									chr15	73098685	73100461	SVA_D:Other:Other:-	0.63157	0.141438	0.169643			chr4	9681310	9682596	LTR12C:LTR:ERV1:+	0.402009	0.395792	0.495
									chr15	75020586	75022177	SVA_D:Other:Other:+	0.19309	0.124257	0.0596296			chr4	13416846	13418109	LTR12C:LTR:ERV1:+	0.435654	0.674016	0.299713
									chr15	84489997	84491992	SVA_D:Other:Other:-	0.921008	0.654334	0.157143			chr4	14360105	14361446	LTR12C:LTR:ERV1:+	0.106219	0.0392785	0.645521
									chr15	101313768	101315222	SVA_D:Other:Other:-	0.615861	0.0925031	0.361667			chr4	15616354	15617904	LTR12C:LTR:ERV1:+	0.915708	0.891455	0.422583
									chr16	2449311	2450819	SVA_D:Other:Other:-	0.752714	0.254067	0.0240575			chr4	15787391	15788884	LTR12C:LTR:ERV1:-	0.48062	0.390578	0.458754
									chr16	8164385	8165934	SVA_D:Other:Other:+	0.427476	0.100879	0.0363095			chr4	17415026	17416459	LTR12C:LTR:ERV1:-	0.190571	0.141893	0.377972
									chr16	14626032	14627262	SVA_D:Other:Other:-	0.328849	0.0215289	0.00833333			chr4	17437252	17438739	LTR12C:LTR:ERV1:-	0.0282761	0.0674308	0.294125
									chr16	17598871	17600721	SVA_D:Other:Other:-	0.570276	0.121714	0.459968			chr4	17767331	17768991	LTR12C:LTR:ERV1:-	0.248168	0.206091	0.710002
									chr16	28676780	28678371	SVA_D:Other:Other:-	0.839401	0.657964	0.0147392			chr4	18160032	18161457	LTR12C:LTR:ERV1:-	0.0721955	0.0605627	0.0672679
									chr16	29070841	29072393	SVA_D:Other:Other:-	0.829305	0.623744	0.0401786			chr4	18419093	18420526	LTR12C:LTR:ERV1:-	0.224726	0.124774	0.0402357
									chr16	46686572	46688087	SVA_D:Other:Other:-	0.742313	0.280449	0.165476			chr4	18631179	18632749	LTR12C:LTR:ERV1:-	0.887729	0.903527	0.622744
									chr16	47033358	47035202	SVA_D:Other:Other:+	0.616259	0.0437822	0.269525			chr4	20179654	20181209	LTR12C:LTR:ERV1:-	0.818066	0.671234	0.771795
									chr16	47214263	47216109	SVA_D:Other:Other:+	0.850209	0.518053	0.559699			chr4	22779339	22780758	LTR12C:LTR:ERV1:-	0.585136	0.365537	0.10946
									chr16	49243567	49245165	SVA_D:Other:Other:-	0.43505	0.062742	0.0346955			chr4	25240054	25241418	LTR12C:LTR:ERV1:-	0.943983	0.963128	0.865608
									chr16	53572452	53574158	SVA_D:Other:Other:+	0.709744	0.125104	0.191615			chr4	25247536	25248793	LTR12C:LTR:ERV1:-	0.902844	0.895848	0.884008
									chr16	53731234	53733318	SVA_D:Other:Other:+	0.924917	0.854367	0.564912			chr4	26064733	26066167	LTR12C:LTR:ERV1:-	0.0481125	0.0107735	0.172403
									chr16	57233820	57235903	SVA_D:Other:Other:-	0.744328	0.56994	0.130357			chr4	27979132	27980519	LTR12C:LTR:ERV1:-	0.900886	0.818788	0.51552
									chr16	58879421	58880991	SVA_D:Other:Other:-	0.90537	0.753755	0.0770975			chr4	28114218	28115657	LTR12C:LTR:ERV1:+	0.527041	0.36386	0.103761
									chr16	66664208	66665833	SVA_D:Other:Other:+	0.926027	0.790265	0.120345			chr4	28117996	28119327	LTR12C:LTR:ERV1:-	0.277348	0.160965	0.114774
									chr16	68196652	68198333	SVA_D:Other:Other:-	0.893046	0.657287	0.318611			chr4	28829436	28831028	LTR12C:LTR:ERV1:+	0.303037	0.351746	0.50625
									chr16	71622713	71624168	SVA_D:Other:Other:+	0.905925	0.523682	0.00884354			chr4	29048956	29050338	LTR12C:LTR:ERV1:+	0.256452	0.165954	0.516635
									chr16	89528451	89530101	SVA_D:Other:Other:+	0.8979	0.879341	0.0424358			chr4	29118792	29120243	LTR12C:LTR:ERV1:+	0.10942	0.0232529	0
									chr17	474750	476282	SVA_D:Other:Other:+	0.921421	0.836576	0.0390888			chr4	30094147	30095544	LTR12C:LTR:ERV1:+	0.0590365	0.0679278	0.342744
									chr17	501189	503014	SVA_D:Other:Other:+	0.858413	0.91779	0.205553			chr4	31185746	31187156	LTR12C:LTR:ERV1:-	0.881733	0.783782	0.821236
									chr17	1149817	1151244	SVA_D:Other:Other:-	0.864905	0.27383	0.00416667			chr4	31997828	31999411	LTR12C:LTR:ERV1:+	0.00817701	0.00564374	0.0521371
									chr17	1305936	1307355	SVA_D:Other:Other:-	0.966555	0.845022	0.0395833			chr4	32717294	32718411	LTR12C:LTR:ERV1:-	0.0791426	0.0162007	0.016987
									chr17	3015148	3016938	SVA_D:Other:Other:-	0.486278	0.0789094	0.411387			chr4	34336557	34337827	LTR12C:LTR:ERV1:-	0.143775	0.0463981	0.26746
									chr17	3367298	3369090	SVA_D:Other:Other:+	0.836977	0.381287	0			chr4	34507479	34508765	LTR12C:LTR:ERV1:-	0.199448	0.0443714	0.549627
									chr17	3466972	3468357	SVA_D:Other:Other:-	0.862498	0.279661	0			chr4	36376382	36377688	LTR12C:LTR:ERV1:+	0.754572	0.536764	0.792884
									chr17	3756900	3758383	SVA_D:Other:Other:+	0.625484	0.179003	0.0111111			chr4	38184029	38185376	LTR12C:LTR:ERV1:+	0.0421189	0.00625077	0.326401
									chr17	6128947	6130411	SVA_D:Other:Other:+	0.325934	0.0550595	0.0743229			chr4	38325654	38327085	LTR12C:LTR:ERV1:-	0.922833	0.85412	0.760968
									chr17	15770109	15771695	SVA_D:Other:Other:+	0.949267	0.668635	0.27248			chr4	38628342	38629723	LTR12C:LTR:ERV1:+	0.474422	0.374051	0.197876
									chr17	15997859	15999635	SVA_D:Other:Other:+	0.872974	0.252345	0.0854342			chr4	39719283	39720686	LTR12C:LTR:ERV1:-	0.937341	0.932973	0.715426
									chr17	17814965	17816540	SVA_D:Other:Other:-	0.931065	0.588327	0.047805			chr4	42267773	42269336	LTR12C:LTR:ERV1:+	0.778872	0.522696	0.24623
									chr17	19344105	19345737	SVA_D:Other:Other:+	0.451111	0.0672685	0.0761549			chr4	43674192	43675851	LTR12C:LTR:ERV1:+	0.443547	0.3189	0.163889
									chr17	19378635	19380027	SVA_D:Other:Other:+	0.248186	0.0325652	0.068086			chr4	43848012	43849426	LTR12C:LTR:ERV1:+	0.870828	0.670838	0.669084
									chr17	20587727	20589414	SVA_D:Other:Other:+	0.770413	0.0553571	0.192929			chr4	45421996	45423272	LTR12C:LTR:ERV1:+	0.84871	0.316006	0.605729
									chr17	22239807	22241531	SVA_D:Other:Other:+	0.704056	0.581784	0.653316			chr4	45458223	45459698	LTR12C:LTR:ERV1:-	0.776114	0.569657	0.801306
									chr17	26785168	26786776	SVA_D:Other:Other:+	0.679564	0.0306259	0.152499			chr4	45478489	45479922	LTR12C:LTR:ERV1:-	0.883608	0.697855	0.79424
									chr17	26930494	26932324	SVA_D:Other:Other:-	0.920245	0.68912	0.0123457			chr4	45532298	45533839	LTR12C:LTR:ERV1:+	0.90095	0.849638	0.777965
									chr17	27859373	27860875	SVA_D:Other:Other:-	0.942952	0.812725	0.0963367			chr4	46700709	46702292	LTR12C:LTR:ERV1:+	0.906581	0.852236	0.702361
									chr17	28849852	28851242	SVA_D:Other:Other:+	0.637199	0.219013	0.0626932			chr4	46783520	46785000	LTR12C:LTR:ERV1:+	0.905612	0.789897	0.609909
									chr17	37086258	37087994	SVA_D:Other:Other:-	0.280661	0.144551	0.033179			chr4	46805932	46807371	LTR12C:LTR:ERV1:-	0.722085	0.496158	0.802381
									chr17	37493198	37494788	SVA_D:Other:Other:+	0.929258	0.904986	0.0874609			chr4	46832874	46834437	LTR12C:LTR:ERV1:+	0.262954	0.209426	0.350425
									chr17	40031659	40033178	SVA_D:Other:Other:+	0.886109	0.843166	0.104082			chr4	47379298	47380635	LTR12C:LTR:ERV1:-	0.0514044	0.00455329	0.111477
									chr17	40600471	40602063	SVA_D:Other:Other:+	0.921765	0.878664	0.0411765			chr4	48677175	48678505	LTR12C:LTR:ERV1:+	0.522422	0.618657	0.371181
									chr17	42601351	42603122	SVA_D:Other:Other:+	0.878876	0.34337	0.0189394			chr4	53274986	53276476	LTR12C:LTR:ERV1:-	0.872606	0.846252	0.26862
									chr17	45497281	45499010	SVA_D:Other:Other:+	0.769063	0.195814	0.0923077			chr4	54219191	54220799	LTR12C:LTR:ERV1:-	0.897119	0.843477	0.739502
									chr17	56219155	56220882	SVA_D:Other:Other:+	0.298843	0.0709505	0.450471			chr4	55014549	55015960	LTR12C:LTR:ERV1:-	0.278024	0.176916	0.181397
									chr17	57576808	57578526	SVA_D:Other:Other:+	0.156156	0.084862	0.142509			chr4	55020304	55021854	LTR12C:LTR:ERV1:-	0.931963	0.858732	0.377304
									chr17	61533164	61535051	SVA_D:Other:Other:+	0.853431	0.137112	0.069141			chr4	55498521	55499775	LTR12C:LTR:ERV1:+	0.0447981	0.0192308	0.653767
									chr17	62712107	62713487	SVA_D:Other:Other:+	0.318453	0.11002	0.175674			chr4	55859500	55860827	LTR12C:LTR:ERV1:+	0.663327	0.51018	0.48751
									chr17	63479893	63481370	SVA_D:Other:Other:+	0.584136	0.102067	0.241699			chr4	56107487	56108860	LTR12C:LTR:ERV1:+	0.793536	0.860843	0.323991
									chr17	78510656	78511880	SVA_D:Other:Other:-	0.876715	0.173479	0.0333333			chr4	58165220	58166892	LTR12C:LTR:ERV1:-	0.890251	0.882742	0.800951
									chr17	79584689	79586244	SVA_D:Other:Other:+	0.945246	0.90889	0.190061			chr4	58594944	58596508	LTR12C:LTR:ERV1:-	0.680681	0.526627	0.58063
									chr18	2867370	2868789	SVA_D:Other:Other:-	0.929312	0.546934	0.17521			chr4	58831409	58832835	LTR12C:LTR:ERV1:+	0.551209	0.46807	0.277315
									chr18	6826685	6828405	SVA_D:Other:Other:-	0.632127	0.118917	0.106811			chr4	58833184	58834869	LTR12C:LTR:ERV1:+	0.936723	0.88985	0.730841
									chr18	7097821	7099486	SVA_D:Other:Other:+	0.902993	0.198607	0.160194			chr4	59322920	59324726	LTR12C:LTR:ERV1:+	0.630497	0.356069	0.609159
									chr18	11959017	11960661	SVA_D:Other:Other:+	0.548004	0.0697388	0.056282			chr4	59331114	59332570	LTR12C:LTR:ERV1:+	0.876087	0.814635	0.75119
									chr18	12873244	12875325	SVA_D:Other:Other:+	0.895618	0.847945	0.0222222			chr4	59590127	59591337	LTR12C:LTR:ERV1:+	0.826068	0.652422	0.648889
									chr18	13097648	13099213	SVA_D:Other:Other:-	0.925757	0.83977	0.204722			chr4	60906866	60908493	LTR12C:LTR:ERV1:-	0.807387	0.707584	0.663937
									chr18	14009955	14011906	SVA_D:Other:Other:-	0.807022	0.590529	0.494134			chr4	63356760	63358177	LTR12C:LTR:ERV1:-	0.294189	0.13081	0.511508
									chr18	19171627	19173550	SVA_D:Other:Other:-	0.824268	0.123481	0.231621			chr4	64807788	64809157	LTR12C:LTR:ERV1:-	0.0564979	0.105959	0.1
									chr18	33656880	33658670	SVA_D:Other:Other:-	0.928325	0.275682	0.341412			chr4	65505327	65506755	LTR12C:LTR:ERV1:-	0.413785	0.106007	0.38854
									chr18	46605773	46607924	SVA_D:Other:Other:-	0.31922	0.116538	0.217262			chr4	67426133	67427763	LTR12C:LTR:ERV1:-	0.551286	0.280533	0.127654
									chr18	47325579	47327279	SVA_D:Other:Other:+	0.859128	0.622537	0.184921			chr4	67576938	67578694	LTR12C:LTR:ERV1:-	0.874146	0.595356	0.298988
									chr18	55299331	55301135	SVA_D:Other:Other:-	0.941066	0.917419	0.138842			chr4	67725704	67727031	LTR12C:LTR:ERV1:+	0.0642341	0.0496356	0.314873
									chr18	74356852	74358427	SVA_D:Other:Other:+	0.89152	0.320312	0.11673			chr4	68017416	68018701	LTR12C:LTR:ERV1:+	0.120851	0.0871522	0.0157828
									chr18	74739968	74741416	SVA_D:Other:Other:-	0.855268	0.334895	0.330556			chr4	68147666	68149093	LTR12C:LTR:ERV1:-	0.838721	0.82711	0.64697
									chr19	5701310	5703042	SVA_D:Other:Other:+	0.927319	0.90668	0.0452991			chr4	68151381	68152969	LTR12C:LTR:ERV1:-	0.495983	0.317796	0.868114
									chr19	6354798	6356476	SVA_D:Other:Other:+	0.936247	0.853234	0.0225942			chr4	68761455	68762843	LTR12C:LTR:ERV1:-	0.774716	0.215368	0.757957
									chr19	8849095	8851087	SVA_D:Other:Other:+	0.0669711	0.0320792	0.250828			chr4	69980015	69981525	LTR12C:LTR:ERV1:-	0.632504	0.358715	0.101859
									chr19	9789996	9791610	SVA_D:Other:Other:+	0.717749	0.785032	0.170719			chr4	70440958	70442539	LTR12C:LTR:ERV1:-	0.0973058	0.0365501	0.330933
									chr19	12577935	12579524	SVA_D:Other:Other:+	0.89169	0.263743	0.0233516			chr4	70789421	70790843	LTR12C:LTR:ERV1:+	0.097954	0.075651	0.202734
									chr19	18028420	18030317	SVA_D:Other:Other:+	0.87296	0.339394	0.0133668			chr4	71986470	71987912	LTR12C:LTR:ERV1:+	0.544028	0.434036	0.340193
									chr19	18115825	18117465	SVA_D:Other:Other:-	0.809892	0.303539	0.0285714			chr4	75264062	75265343	LTR12C:LTR:ERV1:-	0.0158777	0.0474722	0.641052
									chr19	20248109	20249434	SVA_D:Other:Other:+	0.815858	0.336764	0.0292743			chr4	76963684	76965003	LTR12C:LTR:ERV1:-	0.932624	0.921461	0.555556
									chr19	20286140	20287623	SVA_D:Other:Other:-	0.831189	0.640528	0			chr4	76970944	76972373	LTR12C:LTR:ERV1:-	0.832697	0.898466	0.631314
									chr19	20324673	20326120	SVA_D:Other:Other:+	0.806299	0.161243	0.045786			chr4	78482858	78484421	LTR12C:LTR:ERV1:+	0.724591	0.650897	0.680421
									chr19	20406576	20408040	SVA_D:Other:Other:+	0.726518	0.0139942	0.0753968			chr4	78491635	78493302	LTR12C:LTR:ERV1:+	0.734311	0.59258	0.570726
									chr19	21669126	21670491	SVA_D:Other:Other:-	0.932093	0.498482	0.0078125			chr4	80042904	80044242	LTR12C:LTR:ERV1:+	0.330157	0.141315	0.579893
									chr19	21693377	21694910	SVA_D:Other:Other:-	0.96212	0.937549	0.156009			chr4	81223809	81225199	LTR12C:LTR:ERV1:+	0.649887	0.329215	0.671662
									chr19	21957961	21959468	SVA_D:Other:Other:+	0.778249	0.0923153	0			chr4	82501422	82502727	LTR12C:LTR:ERV1:+	0.501245	0.201467	0.81978
									chr19	23053677	23055249	SVA_D:Other:Other:-	0.146514	0.0347928	0.17733			chr4	85585688	85587268	LTR12C:LTR:ERV1:+	0.643223	0.46603	0.430524
									chr19	23355340	23356836	SVA_D:Other:Other:+	0.677244	0.75923	0.0237025			chr4	86941663	86943325	LTR12C:LTR:ERV1:-	0.231855	0.204822	0.488248
									chr19	34622818	34624603	SVA_D:Other:Other:+	0.76265	0.147443	0.0867586			chr4	87468290	87469596	LTR12C:LTR:ERV1:+	0.59554	0.458294	0.444818
									chr19	35412334	35413909	SVA_D:Other:Other:-	0.850685	0.179082	0.213657			chr4	88316261	88317662	LTR12C:LTR:ERV1:-	0.691463	0.368117	0.132315
									chr19	36981364	36983060	SVA_D:Other:Other:+	0.320634	0.0767509	0.00937951			chr4	88783914	88785383	LTR12C:LTR:ERV1:-	0.651062	0.246605	0.385042
									chr19	39345610	39347374	SVA_D:Other:Other:-	0.764782	0.115929	0.0971306			chr4	89233183	89234862	LTR12C:LTR:ERV1:-	0.926159	0.935952	0.733254
									chr19	43113817	43115463	SVA_D:Other:Other:-	0.829822	0.174023	0.126689			chr4	90411024	90412516	LTR12C:LTR:ERV1:+	0.155333	0.0550122	0.124948
									chr19	44992353	44993844	SVA_D:Other:Other:+	0.799697	0.479348	0.116162			chr4	92138092	92139685	LTR12C:LTR:ERV1:-	0.18143	0.101933	0.50184
									chr19	47512358	47513887	SVA_D:Other:Other:+	0.910831	0.350162	0.0633333			chr4	95090809	95092162	LTR12C:LTR:ERV1:+	0.26975	0.349396	0.312203
									chr19	50588970	50590603	SVA_D:Other:Other:+	0.285214	0.0226878	0.2574			chr4	97442101	97443573	LTR12C:LTR:ERV1:+	0.838113	0.850801	0.728184
									chr19	50643656	50645130	SVA_D:Other:Other:+	0.467785	0.153882	0.083455			chr4	97663553	97664915	LTR12C:LTR:ERV1:+	0.885574	0.838385	0.801787
									chr19	53179314	53180396	SVA_D:Other:Other:+	0.919754	0.607881	0.233163			chr4	98358223	98359800	LTR12C:LTR:ERV1:-	0.865924	0.832542	0.81273
									chr19	53725484	53726902	SVA_D:Other:Other:+	0.888196	0.455237	0.133069			chr4	98844222	98845452	LTR12C:LTR:ERV1:+	0.890731	0.767674	0.881006
									chr19	53772638	53773916	SVA_D:Other:Other:-	0.537244	0.129941	0.108571			chr4	99913645	99915193	LTR12C:LTR:ERV1:-	0.223008	0.136612	0.336663
									chr19	58657884	58659777	SVA_D:Other:Other:+	0.778257	0.687336	0.389211			chr4	100280662	100282424	LTR12C:LTR:ERV1:+	0.780075	0.700316	0.601634
									chr19	58915599	58917753	SVA_D:Other:Other:-	0.88711	0.803372	0.0717391			chr4	101116582	101118242	LTR12C:LTR:ERV1:-	0.0571361	0.04908	0.174389
									chr20	30014069	30016242	SVA_D:Other:Other:+	0.364083	0.0818543	0.0692641			chr4	101528969	101530475	LTR12C:LTR:ERV1:-	0.151034	0.0358688	0.08
									chr20	5681973	5683380	SVA_D:Other:Other:+	0.480853	0.174224	0.229046			chr4	103155324	103156913	LTR12C:LTR:ERV1:+	0.860622	0.810894	0.735791
									chr20	18174523	18176033	SVA_D:Other:Other:+	0.692116	0.131238	0.164455			chr4	103166026	103167311	LTR12C:LTR:ERV1:+	0.801062	0.820712	0.558964
									chr20	19658352	19660203	SVA_D:Other:Other:-	0.908882	0.448653	0			chr4	103170536	103172008	LTR12C:LTR:ERV1:-	0.726591	0.735733	0.839484
									chr20	25541652	25543426	SVA_D:Other:Other:+	0.955298	0.791252	0.228005			chr4	103404112	103405813	LTR12C:LTR:ERV1:+	0.935296	0.919626	0.529599
									chr20	29525676	29527377	SVA_D:Other:Other:-	0.809522	0.431533	0.0315789			chr4	104857751	104859508	LTR12C:LTR:ERV1:+	0.777084	0.3926	0.733918
									chr20	30709006	30711015	SVA_D:Other:Other:-	0.865274	0.637725	0.31602			chr4	107012544	107014113	LTR12C:LTR:ERV1:-	0.871193	0.758906	0.493197
									chr20	31702734	31704267	SVA_D:Other:Other:+	0.643518	0.0775107	0.124684			chr4	107445644	107447065	LTR12C:LTR:ERV1:-	0.0954231	0.0626635	0.0622222
									chr20	31772337	31774052	SVA_D:Other:Other:-	0.824565	0.0944784	0.110007			chr4	107601757	107603175	LTR12C:LTR:ERV1:-	0.827969	0.851943	0.810963
									chr20	32123476	32125339	SVA_D:Other:Other:-	0.852749	0.301746	0.141715			chr4	107994072	107995704	LTR12C:LTR:ERV1:+	0.514212	0.393763	0.570985
									chr20	32286283	32288520	SVA_D:Other:Other:+	0.830795	0.616997	0.0557705			chr4	109904693	109906072	LTR12C:LTR:ERV1:-	0.118649	0.0884536	0.182717
									chr20	32288543	32290140	SVA_D:Other:Other:+	0.956523	0.804398	0.0903744			chr4	109933456	109935059	LTR12C:LTR:ERV1:+	0.942703	0.691007	0.652201
									chr20	32719618	32721485	SVA_D:Other:Other:+	0.455611	0.0250954	0.0406325			chr4	110478393	110479929	LTR12C:LTR:ERV1:+	0.537187	0.355033	0.49006
									chr20	33061968	33063510	SVA_D:Other:Other:-	0.953848	0.923184	0.0208333			chr4	113143427	113144847	LTR12C:LTR:ERV1:+	0.644072	0.463839	0.638863
									chr20	33245755	33247872	SVA_D:Other:Other:+	0.938816	0.842934	0.0866583			chr4	113751788	113753228	LTR12C:LTR:ERV1:+	0.907709	0.894456	0.641112
									chr20	34588675	34590368	SVA_D:Other:Other:-	0.814415	0.100525	0.274208			chr4	114693318	114694647	LTR12C:LTR:ERV1:+	0.145901	0.0484233	0.790238
									chr20	35640258	35642008	SVA_D:Other:Other:+	0.913316	0.61602	0.0148148			chr4	115068724	115070277	LTR12C:LTR:ERV1:-	0.923269	0.904176	0.366104
									chr20	37006831	37008588	SVA_D:Other:Other:+	0.2596	0.0774286	0.0560896			chr4	115216505	115217811	LTR12C:LTR:ERV1:-	0.602783	0.472202	0.693197
									chr20	37089307	37091248	SVA_D:Other:Other:-	0.197201	0.119207	0			chr4	116099774	116101137	LTR12C:LTR:ERV1:-	0.3628	0.159455	0.0503968
									chr20	40183047	40184934	SVA_D:Other:Other:-	0.638161	0.055043	0.284921			chr4	116120488	116121917	LTR12C:LTR:ERV1:-	0.577228	0.459333	0.515909
									chr20	42235231	42236836	SVA_D:Other:Other:-	0.915811	0.800236	0.135397			chr4	116598814	116600155	LTR12C:LTR:ERV1:-	0.0872729	0.0257738	0.0267857
									chr20	44273658	44275470	SVA_D:Other:Other:-	0.765983	0.163273	0.417676			chr4	119186522	119187885	LTR12C:LTR:ERV1:+	0.180229	0.10507	0.0065
									chr20	46153676	46155552	SVA_D:Other:Other:-	0.94438	0.930229	0.189594			chr4	119897228	119898765	LTR12C:LTR:ERV1:-	0.49627	0.365827	0.11046
									chr20	48537952	48539655	SVA_D:Other:Other:+	0.834806	0.250624	0.1599			chr4	120094752	120096306	LTR12C:LTR:ERV1:+	0.39674	0.196646	0.37561
									chr20	52470320	52471770	SVA_D:Other:Other:+	0.881778	0.149913	0.0706349			chr4	121728903	121730285	LTR12C:LTR:ERV1:-	0.930147	0.912689	0.798013
									chr21	29935492	29937127	SVA_D:Other:Other:+	0.898381	0.873335	0.295313			chr4	123591192	123592502	LTR12C:LTR:ERV1:+	0.914143	0.91881	0.780319
									chr21	30382963	30385103	SVA_D:Other:Other:+	0.891255	0.335913	0.0957734			chr4	124355526	124357080	LTR12C:LTR:ERV1:-	0.857332	0.807392	0.784301
									chr21	46243963	46245849	SVA_D:Other:Other:+	0.868277	0.731791	0.612718			chr4	124458890	124460599	LTR12C:LTR:ERV1:+	0.303209	0.208852	0.254134
									chr21	47204380	47206040	SVA_D:Other:Other:+	0.935258	0.794083	0.0494479			chr4	125260025	125261313	LTR12C:LTR:ERV1:+	0.159531	0.110578	0.289906
									chr22	22237232	22239116	SVA_D:Other:Other:-	0.931027	0.797295	0.169697			chr4	126149971	126151308	LTR12C:LTR:ERV1:-	0.290271	0.229915	0.0813492
									chr22	24460980	24462011	SVA_D:Other:Other:-	0.948372	0.890189	0.115397			chr4	126201932	126203289	LTR12C:LTR:ERV1:+	0.0924273	0.0717411	0.254555
									chr22	25673122	25674642	SVA_D:Other:Other:-	0.663151	0.159634	0.0809546			chr4	126665972	126667408	LTR12C:LTR:ERV1:+	0.653173	0.317758	0.513212
									chr22	28948738	28950375	SVA_D:Other:Other:+	0.886847	0.738121	0.208189			chr4	127121624	127123011	LTR12C:LTR:ERV1:-	0.0303714	0.0297448	0.0664065
									chr22	30039281	30040962	SVA_D:Other:Other:-	0.884765	0.581444	0.0453416			chr4	127411000	127412460	LTR12C:LTR:ERV1:+	0.441359	0.452588	0.369223
									chr22	31026995	31028513	SVA_D:Other:Other:-	0.937813	0.880084	0.198168			chr4	128300907	128302782	LTR12C:LTR:ERV1:+	0.919346	0.91929	0.595285
									chr22	35021272	35022965	SVA_D:Other:Other:-	0.697979	0.176847	0.264103			chr4	128884535	128885956	LTR12C:LTR:ERV1:-	0.0391323	0.0285302	0.00950656
									chr22	35079693	35081258	SVA_D:Other:Other:-	0.796135	0.440164	0.332778			chr4	128967903	128969277	LTR12C:LTR:ERV1:-	0.0958207	0.0590443	0.0611111
									chr22	38182206	38183623	SVA_D:Other:Other:+	0.909066	0.316743	0.0478788			chr4	129593635	129595009	LTR12C:LTR:ERV1:+	0.162476	0.0520279	0.479121
									chr22	41690027	41691719	SVA_D:Other:Other:+	0.775702	0.144752	0.206988			chr4	130933759	130935503	LTR12C:LTR:ERV1:+	0.515132	0.306702	0.485328
									chr22	42026496	42028188	SVA_D:Other:Other:-	0.937751	0.941884	0.154304			chr4	132983056	132984386	LTR12C:LTR:ERV1:-	0.653187	0.401086	0.691877
									chr22	43145974	43147309	SVA_D:Other:Other:-	0.447148	0.0776349	0.0524397			chr4	134160473	134162127	LTR12C:LTR:ERV1:-	0.457437	0.379805	0.0561005
																		chr4	135422653	135424082	LTR12C:LTR:ERV1:+	0.0452947	0.0186483	0.479497
																		chr4	135868262	135869860	LTR12C:LTR:ERV1:-	0.932873	0.909048	0.85119
																		chr4	136327590	136329115	LTR12C:LTR:ERV1:+	0.941214	0.948567	0.669021
																		chr4	137316321	137317807	LTR12C:LTR:ERV1:+	0.177076	0.217112	0.0392157
																		chr4	137849978	137851397	LTR12C:LTR:ERV1:+	0.598888	0.487285	0.505782
																		chr4	138341990	138343349	LTR12C:LTR:ERV1:+	0.204383	0.179238	0.228857
																		chr4	138654716	138656134	LTR12C:LTR:ERV1:+	0.467438	0.240613	0.236111
																		chr4	138863042	138864591	LTR12C:LTR:ERV1:+	0.0697188	0.020258	0.451488
																		chr4	138973197	138974618	LTR12C:LTR:ERV1:-	0.396637	0.531619	0.343442
																		chr4	139008914	139010403	LTR12C:LTR:ERV1:-	0.210334	0.129662	0.150526
																		chr4	142134533	142136116	LTR12C:LTR:ERV1:+	0.588484	0.341874	0.535626
																		chr4	142253368	142254913	LTR12C:LTR:ERV1:-	0.0251552	0.0279974	0
																		chr4	142525779	142527056	LTR12C:LTR:ERV1:-	0.90622	0.855427	0.727988
																		chr4	142609993	142611576	LTR12C:LTR:ERV1:-	0.422766	0.307745	0.406934
																		chr4	143818473	143819899	LTR12C:LTR:ERV1:+	0.415847	0.266816	0.464135
																		chr4	155965272	155966676	LTR12C:LTR:ERV1:+	0.218773	0.187214	0.480903
																		chr4	158965150	158966629	LTR12C:LTR:ERV1:+	0.26259	0.162934	0.01
																		chr4	159487915	159489439	LTR12C:LTR:ERV1:+	0.877133	0.803074	0.744921
																		chr4	159848671	159850225	LTR12C:LTR:ERV1:+	0.449044	0.231992	0.493273
																		chr4	160171904	160173291	LTR12C:LTR:ERV1:+	0.310036	0.115669	0.572066
																		chr4	160299076	160300594	LTR12C:LTR:ERV1:+	0.804709	0.576751	0.453582
																		chr4	160310937	160312336	LTR12C:LTR:ERV1:+	0.77302	0.579285	0.251984
																		chr4	160789319	160790751	LTR12C:LTR:ERV1:-	0.450346	0.168219	0.0616162
																		chr4	161402739	161404126	LTR12C:LTR:ERV1:+	0.0640073	0.0107801	0.724749
																		chr4	161470535	161471836	LTR12C:LTR:ERV1:-	0.280355	0.159505	0.22024
																		chr4	162198224	162199634	LTR12C:LTR:ERV1:+	0.131071	0.0487891	0.0962858
																		chr4	163660510	163662058	LTR12C:LTR:ERV1:+	0.153954	0.0424824	0.116412
																		chr4	164073815	164075369	LTR12C:LTR:ERV1:+	0.601066	0.452427	0.190338
																		chr4	164110239	164111422	LTR12C:LTR:ERV1:-	0.0430232	0.0267256	0.101642
																		chr4	164989365	164990905	LTR12C:LTR:ERV1:+	0.917802	0.916518	0.84003
																		chr4	166046136	166047653	LTR12C:LTR:ERV1:-	0.109237	0.137542	0.0814815
																		chr4	166719686	166721093	LTR12C:LTR:ERV1:-	0.316838	0.140021	0.305052
																		chr4	167762979	167764495	LTR12C:LTR:ERV1:-	0.754706	0.824947	0.719896
																		chr4	168502540	168503895	LTR12C:LTR:ERV1:+	0.450697	0.327023	0.525595
																		chr4	169955884	169957551	LTR12C:LTR:ERV1:-	0.605091	0.509235	0.339752
																		chr4	171012199	171013732	LTR12C:LTR:ERV1:+	0.098413	0.037064	0.343377
																		chr4	171964133	171965586	LTR12C:LTR:ERV1:+	0.210481	0.170015	0.0677083
																		chr4	172219243	172220682	LTR12C:LTR:ERV1:+	0.136172	0.0961926	0.0354575
																		chr4	173289748	173291176	LTR12C:LTR:ERV1:-	0.868135	0.92696	0.768552
																		chr4	173297917	173299249	LTR12C:LTR:ERV1:-	0.937278	0.910879	0.874206
																		chr4	173402144	173403578	LTR12C:LTR:ERV1:-	0.693501	0.643764	0.724115
																		chr4	176013089	176014635	LTR12C:LTR:ERV1:+	0.914547	0.758267	0.782143
																		chr4	177545345	177546875	LTR12C:LTR:ERV1:-	0.272554	0.11702	0.534127
																		chr4	178416565	178417991	LTR12C:LTR:ERV1:+	0.636649	0.35015	0.173006
																		chr4	178527250	178528828	LTR12C:LTR:ERV1:-	0.536323	0.255174	0.924711
																		chr4	183307530	183309057	LTR12C:LTR:ERV1:+	0.0827433	0.0234715	0.396202
																		chr4	183966057	183967833	LTR12C:LTR:ERV1:+	0.753528	0.427237	0.605226
																		chr4	184354145	184355562	LTR12C:LTR:ERV1:+	0.78944	0.8962	0.333058
																		chr4	184666617	184668148	LTR12C:LTR:ERV1:-	0.863113	0.672337	0.805457
																		chr4	185173918	185175393	LTR12C:LTR:ERV1:+	0.536486	0.515178	0.633862
																		chr4	185512880	185514103	LTR12C:LTR:ERV1:+	0.0613314	0.0217852	0.114478
																		chr4	185662188	185663783	LTR12C:LTR:ERV1:+	0.918836	0.923661	0.747193
																		chr4	187245556	187246799	LTR12C:LTR:ERV1:+	0.171896	0.0752414	0.252711
																		chr4	187811086	187812497	LTR12C:LTR:ERV1:+	0.0905492	0.0616967	0.767049
																		chr4	188426601	188427930	LTR12C:LTR:ERV1:+	0.101536	0.0409806	0.0614943
																		chr4	189099959	189101369	LTR12C:LTR:ERV1:+	0.131386	0.0221502	0.539098
																		chr4	189675477	189677133	LTR12C:LTR:ERV1:+	0.815582	0.799198	0.719838
																		chr4	190157287	190158566	LTR12C:LTR:ERV1:+	0.43317	0.422412	0.510184
																		chr4	190535507	190536931	LTR12C:LTR:ERV1:-	0.83416	0.817487	0.760621
																		chr4	190537040	190538365	LTR12C:LTR:ERV1:-	0.571712	0.493643	0.357113
																		chr4	190615835	190617372	LTR12C:LTR:ERV1:-	0.722809	0.514378	0.450921
																		chr5	764319	766021	LTR12C:LTR:ERV1:+	0.92778	0.919296	0.548946
																		chr5	4837473	4838927	LTR12C:LTR:ERV1:+	0.962647	0.921244	0.870535
																		chr5	9725236	9726864	LTR12C:LTR:ERV1:+	0.46472	0.305278	0.216511
																		chr5	10065409	10066962	LTR12C:LTR:ERV1:+	0.550544	0.408765	0.708986
																		chr5	10375088	10376635	LTR12C:LTR:ERV1:+	0.68203	0.453886	0.0810486
																		chr5	12661846	12663171	LTR12C:LTR:ERV1:+	0.910254	0.85238	0.67323
																		chr5	13244146	13245958	LTR12C:LTR:ERV1:+	0.892152	0.77655	0.70633
																		chr5	13578459	13579864	LTR12C:LTR:ERV1:+	0.102048	0.0689365	0.0831349
																		chr5	14454863	14456531	LTR12C:LTR:ERV1:-	0.944629	0.920484	0.603434
																		chr5	14577204	14578770	LTR12C:LTR:ERV1:+	0.21672	0.191933	0.227036
																		chr5	14993087	14994479	LTR12C:LTR:ERV1:-	0.00811054	0.0127907	0.190048
																		chr5	15095999	15097229	LTR12C:LTR:ERV1:-	0.0365728	0.01765	0.281836
																		chr5	16436110	16437546	LTR12C:LTR:ERV1:+	0.857601	0.804997	0.725346
																		chr5	16717877	16719439	LTR12C:LTR:ERV1:+	0.737401	0.613164	0.203869
																		chr5	17031705	17033065	LTR12C:LTR:ERV1:-	0.0404112	0.0138795	0.0349794
																		chr5	17062145	17063708	LTR12C:LTR:ERV1:+	0.298429	0.304677	0.0337542
																		chr5	18398903	18400349	LTR12C:LTR:ERV1:-	0.299262	0.205582	0.174805
																		chr5	18550981	18552348	LTR12C:LTR:ERV1:-	0.9136	0.874852	0.661408
																		chr5	19287670	19289096	LTR12C:LTR:ERV1:+	0.0682353	0.0279546	0.0879252
																		chr5	23691051	23692441	LTR12C:LTR:ERV1:+	0.480378	0.217473	0.4375
																		chr5	25198725	25200695	LTR12C:LTR:ERV1:-	0.511777	0.428811	0.356515
																		chr5	25613842	25615221	LTR12C:LTR:ERV1:-	0.293732	0.101617	0.758157
																		chr5	26324347	26325708	LTR12C:LTR:ERV1:+	0.0560651	0.00642234	0.221706
																		chr5	26484405	26485952	LTR12C:LTR:ERV1:-	0.30331	0.245176	0.197143
																		chr5	27119822	27121212	LTR12C:LTR:ERV1:+	0.034194	0.00697499	0.134934
																		chr5	27438573	27440121	LTR12C:LTR:ERV1:-	0.219189	0.0580404	0.373086
																		chr5	27743386	27744871	LTR12C:LTR:ERV1:+	0.149605	0.0412177	0.0615385
																		chr5	28076742	28078323	LTR12C:LTR:ERV1:-	0.251921	0.191274	0.187934
																		chr5	29126546	29128293	LTR12C:LTR:ERV1:-	0.342431	0.23703	0.395635
																		chr5	29295607	29297105	LTR12C:LTR:ERV1:-	0.600713	0.304903	0.596897
																		chr5	30345653	30346897	LTR12C:LTR:ERV1:+	0.0712258	0.0260766	0
																		chr5	31691124	31692635	LTR12C:LTR:ERV1:-	0.135265	0.0675008	0.0921296
																		chr5	31777035	31778856	LTR12C:LTR:ERV1:+	0.767851	0.687809	0.491071
																		chr5	33514631	33516056	LTR12C:LTR:ERV1:-	0.394202	0.316736	0.201701
																		chr5	35531546	35533094	LTR12C:LTR:ERV1:+	0.279249	0.0875314	0.373193
																		chr5	35891984	35893534	LTR12C:LTR:ERV1:-	0.297859	0.211511	0.365488
																		chr5	36782501	36783947	LTR12C:LTR:ERV1:+	0.040386	0.0391452	0.395158
																		chr5	40438580	40440023	LTR12C:LTR:ERV1:+	0.707103	0.591711	0.551409
																		chr5	42836296	42837748	LTR12C:LTR:ERV1:+	0.87689	0.827541	0.496503
																		chr5	44883213	44884582	LTR12C:LTR:ERV1:-	0.508477	0.59514	0.708023
																		chr5	49665088	49666588	LTR12C:LTR:ERV1:+	0.77883	0.66272	0.564621
																		chr5	49672484	49673817	LTR12C:LTR:ERV1:+	0.777615	0.77922	0.678781
																		chr5	49760666	49762214	LTR12C:LTR:ERV1:+	0.630768	0.62801	0.463942
																		chr5	53132617	53134110	LTR12C:LTR:ERV1:+	0.836479	0.799108	0.67728
																		chr5	53944148	53945401	LTR12C:LTR:ERV1:-	0.0265213	0.0197279	0.884446
																		chr5	54160723	54162314	LTR12C:LTR:ERV1:+	0.335209	0.253747	0.183908
																		chr5	54909013	54910695	LTR12C:LTR:ERV1:+	0.930218	0.86748	0.465696
																		chr5	55331132	55332421	LTR12C:LTR:ERV1:+	0.593839	0.302587	0.304084
																		chr5	55590996	55592576	LTR12C:LTR:ERV1:+	0.220911	0.146136	0.475582
																		chr5	55793738	55795046	LTR12C:LTR:ERV1:-	0.865515	0.676028	0.771645
																		chr5	57364112	57365491	LTR12C:LTR:ERV1:-	0.664553	0.341171	0.67786
																		chr5	59711100	59712557	LTR12C:LTR:ERV1:+	0.539054	0.367683	0.435873
																		chr5	59825964	59827357	LTR12C:LTR:ERV1:+	0.840068	0.640113	0.764011
																		chr5	63445725	63447149	LTR12C:LTR:ERV1:+	0.963216	0.923202	0.788379
																		chr5	64780548	64781822	LTR12C:LTR:ERV1:-	0.217408	0.083162	0.194983
																		chr5	65798940	65800380	LTR12C:LTR:ERV1:+	0.234065	0.0902846	0.758699
																		chr5	66614517	66615829	LTR12C:LTR:ERV1:+	0.498447	0.532489	0.47735
																		chr5	67315370	67316795	LTR12C:LTR:ERV1:-	0.074719	0.0869156	0.00735294
																		chr5	68216529	68217788	LTR12C:LTR:ERV1:+	0.842848	0.535284	0.841942
																		chr5	72221143	72222536	LTR12C:LTR:ERV1:+	0.849332	0.653989	0.778108
																		chr5	72230934	72232161	LTR12C:LTR:ERV1:+	0.964993	0.882184	0.641797
																		chr5	74629325	74630835	LTR12C:LTR:ERV1:+	0.312165	0.089491	0.205859
																		chr5	79605026	79606325	LTR12C:LTR:ERV1:-	0.94356	0.648541	0.647833
																		chr5	81119358	81120628	LTR12C:LTR:ERV1:+	0.0632276	0.0649634	0.282051
																		chr5	82010317	82011854	LTR12C:LTR:ERV1:+	0.897443	0.721575	0.271429
																		chr5	84125129	84126653	LTR12C:LTR:ERV1:-	0.775509	0.539305	0.707143
																		chr5	85761775	85763062	LTR12C:LTR:ERV1:-	0.928855	0.927332	0.847977
																		chr5	85864392	85865904	LTR12C:LTR:ERV1:-	0.378229	0.173555	0.0552381
																		chr5	88298564	88299983	LTR12C:LTR:ERV1:-	0.273554	0.301743	0.0181052
																		chr5	90142269	90143839	LTR12C:LTR:ERV1:-	0.937168	0.900984	0.827137
																		chr5	91212911	91214294	LTR12C:LTR:ERV1:+	0.0284659	0.0594394	0.450097
																		chr5	91709852	91711165	LTR12C:LTR:ERV1:-	0.0694058	0.0409608	0.577877
																		chr5	91966854	91968295	LTR12C:LTR:ERV1:+	0.337405	0.252218	0.123618
																		chr5	95186686	95188353	LTR12C:LTR:ERV1:+	0.413338	0.256828	0.216938
																		chr5	95954041	95955523	LTR12C:LTR:ERV1:+	0.49911	0.378975	0.574074
																		chr5	96420201	96421490	LTR12C:LTR:ERV1:-	0.4808	0.346799	0.725189
																		chr5	96742712	96744084	LTR12C:LTR:ERV1:+	0.0249378	0.018684	0.400748
																		chr5	96876704	96878146	LTR12C:LTR:ERV1:-	0.358112	0.0699386	0.600301
																		chr5	96914832	96916261	LTR12C:LTR:ERV1:-	0.496807	0.491623	0.557517
																		chr5	99992284	99993586	LTR12C:LTR:ERV1:+	0.110957	0.0295488	0.223293
																		chr5	100023544	100025134	LTR12C:LTR:ERV1:-	0.478989	0.332047	0.493803
																		chr5	100841557	100843003	LTR12C:LTR:ERV1:+	0.890744	0.85963	0.755501
																		chr5	101297045	101298717	LTR12C:LTR:ERV1:-	0.520443	0.316833	0.072619
																		chr5	101490462	101492133	LTR12C:LTR:ERV1:+	0.368389	0.691326	0.24224
																		chr5	101826213	101827614	LTR12C:LTR:ERV1:-	0.895386	0.845311	0.69577
																		chr5	102087597	102088917	LTR12C:LTR:ERV1:+	0.223509	0.0966393	0.154365
																		chr5	102476868	102478283	LTR12C:LTR:ERV1:-	0.33522	0.303119	0.415377
																		chr5	103288696	103290066	LTR12C:LTR:ERV1:-	0.15777	0.0944434	0.740063
																		chr5	103301161	103302568	LTR12C:LTR:ERV1:-	0.908213	0.898004	0.8
																		chr5	104264510	104265943	LTR12C:LTR:ERV1:+	0.430942	0.448206	0.264907
																		chr5	105489824	105491202	LTR12C:LTR:ERV1:+	0.0164544	0.0460952	0.0377232
																		chr5	105541040	105542298	LTR12C:LTR:ERV1:-	0.529136	0.206079	0.769928
																		chr5	105581779	105583093	LTR12C:LTR:ERV1:+	0.0235475	0.0120936	0.0371573
																		chr5	106829766	106831218	LTR12C:LTR:ERV1:+	0.622539	0.638298	0.159386
																		chr5	107776978	107778303	LTR12C:LTR:ERV1:-	0.897496	0.843701	0.7813
																		chr5	108822674	108824102	LTR12C:LTR:ERV1:-	0.194249	0.1863	0.114108
																		chr5	110228740	110230254	LTR12C:LTR:ERV1:-	0.390985	0.366652	0.112095
																		chr5	110946981	110948421	LTR12C:LTR:ERV1:-	0.893304	0.870716	0.798224
																		chr5	112410580	112411847	LTR12C:LTR:ERV1:+	0.897014	0.876846	0.735666
																		chr5	112792659	112794247	LTR12C:LTR:ERV1:+	0.92872	0.824314	0.290604
																		chr5	112952841	112954396	LTR12C:LTR:ERV1:+	0.82043	0.787333	0.602178
																		chr5	113087990	113089378	LTR12C:LTR:ERV1:-	0.228563	0.170163	0.412341
																		chr5	113768196	113769626	LTR12C:LTR:ERV1:+	0.186596	0.052085	0.383227
																		chr5	114030979	114032487	LTR12C:LTR:ERV1:+	0.800165	0.821639	0.851585
																		chr5	114038924	114040552	LTR12C:LTR:ERV1:-	0.490226	0.406471	0.233587
																		chr5	114264363	114265965	LTR12C:LTR:ERV1:+	0.737411	0.605941	0.758806
																		chr5	116640173	116642041	LTR12C:LTR:ERV1:+	0.508266	0.3625	0.337385
																		chr5	117369307	117370755	LTR12C:LTR:ERV1:+	0.475628	0.190119	0.643797
																		chr5	118852616	118854155	LTR12C:LTR:ERV1:+	0.374919	0.252699	0.450559
																		chr5	120442691	120444226	LTR12C:LTR:ERV1:+	0.0430256	0.037717	0.223654
																		chr5	122766059	122767497	LTR12C:LTR:ERV1:+	0.215898	0.06754	0.117575
																		chr5	123283929	123285445	LTR12C:LTR:ERV1:-	0.915255	0.921233	0.83175
																		chr5	123857131	123858470	LTR12C:LTR:ERV1:+	0.136027	0.0565756	0.13183
																		chr5	124227950	124229253	LTR12C:LTR:ERV1:+	0.0455889	0.0223171	0.434325
																		chr5	124424226	124425606	LTR12C:LTR:ERV1:+	0.888662	0.850399	0.741747
																		chr5	126904965	126906374	LTR12C:LTR:ERV1:+	0.0305734	0.0117682	0.0440171
																		chr5	130914619	130916277	LTR12C:LTR:ERV1:-	0.814388	0.772208	0.709638
																		chr5	132574500	132575992	LTR12C:LTR:ERV1:+	0.55492	0.36394	0.394252
																		chr5	132729872	132731249	LTR12C:LTR:ERV1:+	0.921645	0.89684	0.53131
																		chr5	135779719	135781325	LTR12C:LTR:ERV1:+	0.752934	0.740014	0.512843
																		chr5	138928755	138930542	LTR12C:LTR:ERV1:+	0.438709	0.202273	0.510471
																		chr5	150224843	150226495	LTR12C:LTR:ERV1:+	0.77435	0.5257	0.618267
																		chr5	150688565	150690104	LTR12C:LTR:ERV1:+	0.143912	0.0290921	0.20734
																		chr5	154494221	154495562	LTR12C:LTR:ERV1:+	0.538195	0.384991	0.773487
																		chr5	154965368	154966874	LTR12C:LTR:ERV1:-	0.210178	0.130125	0.501074
																		chr5	157120665	157122045	LTR12C:LTR:ERV1:+	0.424658	0.558255	0.563421
																		chr5	157306156	157307438	LTR12C:LTR:ERV1:+	0.900672	0.861221	0.637363
																		chr5	157313700	157315000	LTR12C:LTR:ERV1:+	0.893666	0.903162	0.720437
																		chr5	158545999	158547425	LTR12C:LTR:ERV1:+	0.272265	0.280297	0.487067
																		chr5	159620051	159621477	LTR12C:LTR:ERV1:-	0.257086	0.128397	0.130602
																		chr5	160592264	160593664	LTR12C:LTR:ERV1:-	0.201882	0.0477458	0.8013
																		chr5	162048665	162050404	LTR12C:LTR:ERV1:+	0.857049	0.80569	0.710184
																		chr5	162782693	162784000	LTR12C:LTR:ERV1:+	0.789019	0.497149	0.682619
																		chr5	166210544	166212015	LTR12C:LTR:ERV1:-	0.759186	0.479299	0.805329
																		chr5	166236324	166237764	LTR12C:LTR:ERV1:-	0.570794	0.291917	0.666566
																		chr5	166352931	166354516	LTR12C:LTR:ERV1:-	0.255531	0.131585	0.713486
																		chr5	166362363	166363788	LTR12C:LTR:ERV1:-	0.949272	0.902105	0.681902
																		chr5	172640275	172641624	LTR12C:LTR:ERV1:+	0.0283321	0.0296066	0.451737
																		chr5	174307483	174309019	LTR12C:LTR:ERV1:+	0.894751	0.816718	0.751991
																		chr5	174328332	174329775	LTR12C:LTR:ERV1:+	0.934965	0.927095	0.792856
																		chr5	175647926	175649591	LTR12C:LTR:ERV1:-	0.119081	0.102652	0.241362
																		chr5	177115054	177116724	LTR12C:LTR:ERV1:+	0.0854176	0.0550831	0.200824
																		chr5	180395764	180396924	LTR12C:LTR:ERV1:-	0.215355	0.0696429	0.704956
																		chr6	10616214	10617805	LTR12C:LTR:ERV1:-	0.444075	0.381316	0.349123
																		chr6	95944646	95946315	LTR12C:LTR:ERV1:+	0.887793	0.895336	0.749339
																		chr6	425175	426763	LTR12C:LTR:ERV1:-	0.026625	0.00731382	0.440485
																		chr6	434781	436104	LTR12C:LTR:ERV1:-	0.0498485	0.0355329	0.656755
																		chr6	449812	451397	LTR12C:LTR:ERV1:+	0.0472098	0.0427827	0.64321
																		chr6	694445	695766	LTR12C:LTR:ERV1:+	0.031198	0.0082546	0.586013
																		chr6	1456484	1457767	LTR12C:LTR:ERV1:-	0.22628	0.213133	0.540707
																		chr6	2762877	2764066	LTR12C:LTR:ERV1:-	0.0498275	0.0133536	0.028125
																		chr6	2860194	2861967	LTR12C:LTR:ERV1:+	0.364617	0.258827	0.00320513
																		chr6	2935898	2937577	LTR12C:LTR:ERV1:+	0.0921316	0.0391865	0.0690283
																		chr6	3170818	3172183	LTR12C:LTR:ERV1:+	0.933857	0.740846	0.0981398
																		chr6	3253637	3255060	LTR12C:LTR:ERV1:+	0.0246085	0.0166281	0.00543478
																		chr6	3719792	3721563	LTR12C:LTR:ERV1:-	0.610033	0.448257	0.566494
																		chr6	3758224	3759582	LTR12C:LTR:ERV1:+	0.227858	0.37993	0.0471597
																		chr6	3771689	3773210	LTR12C:LTR:ERV1:+	0.0286736	0.012778	0
																		chr6	4090193	4091714	LTR12C:LTR:ERV1:+	0.136999	0.0787425	0.0525397
																		chr6	4190710	4192077	LTR12C:LTR:ERV1:-	0.935373	0.932774	0.733785
																		chr6	4724703	4726103	LTR12C:LTR:ERV1:-	0.0949399	0.0222441	0.130744
																		chr6	6605886	6607223	LTR12C:LTR:ERV1:-	0.0707613	0.0325883	0.104198
																		chr6	6612382	6614035	LTR12C:LTR:ERV1:-	0.179427	0.0472383	0.02
																		chr6	6761869	6763276	LTR12C:LTR:ERV1:-	0	0.0327874	0.0443609
																		chr6	7315271	7316554	LTR12C:LTR:ERV1:+	0.698288	0.397403	0.118849
																		chr6	7344267	7345710	LTR12C:LTR:ERV1:+	0.187698	0.121085	0.0247024
																		chr6	7425842	7427520	LTR12C:LTR:ERV1:+	0.0416571	0.0228574	0.0538244
																		chr6	7441334	7442947	LTR12C:LTR:ERV1:+	0.358978	0.0809321	0.378084
																		chr6	7456416	7458043	LTR12C:LTR:ERV1:+	0.157294	0.0863569	0.352518
																		chr6	8665761	8667845	LTR12C:LTR:ERV1:+	0.603582	0.358227	0.440742
																		chr6	8887218	8888502	LTR12C:LTR:ERV1:+	0.065051	0.0684524	0.129679
																		chr6	9024329	9025910	LTR12C:LTR:ERV1:+	0.103422	0.0476231	0.0388889
																		chr6	9040823	9042277	LTR12C:LTR:ERV1:+	0.145146	0.0852585	0.281446
																		chr6	9289848	9291233	LTR12C:LTR:ERV1:-	0.0525739	0.0292859	0.0345679
																		chr6	9942224	9943555	LTR12C:LTR:ERV1:+	0.418513	0.31698	0.581627
																		chr6	10073952	10075474	LTR12C:LTR:ERV1:-	0.0335618	0.0079279	0.0398095
																		chr6	10171749	10173240	LTR12C:LTR:ERV1:+	0.183846	0.0947028	0.395591
																		chr6	10337460	10338848	LTR12C:LTR:ERV1:+	0.103227	0.0603453	0.226854
																		chr6	10481931	10483513	LTR12C:LTR:ERV1:-	0.322057	0.187808	0.102311
																		chr6	10487080	10488530	LTR12C:LTR:ERV1:-	0.169106	0.129881	0.0543115
																		chr6	10659948	10661621	LTR12C:LTR:ERV1:+	0.0202706	0.0556344	0.0203704
																		chr6	10720651	10722333	LTR12C:LTR:ERV1:+	0.0215274	0.00894553	0.00396825
																		chr6	11087268	11088814	LTR12C:LTR:ERV1:+	0.114766	0.0503815	0.0764871
																		chr6	11171125	11172491	LTR12C:LTR:ERV1:+	0.0758224	0.0312925	0.154482
																		chr6	11416315	11417783	LTR12C:LTR:ERV1:-	0.193075	0.0728116	0
																		chr6	11933075	11934660	LTR12C:LTR:ERV1:+	0.0479647	0.0569549	0.0377143
																		chr6	12017456	12018674	LTR12C:LTR:ERV1:-	0.468274	0.311207	0.0680272
																		chr6	12107699	12109186	LTR12C:LTR:ERV1:-	0.44986	0.274375	0.364217
																		chr6	13541604	13543110	LTR12C:LTR:ERV1:+	0.0645631	0.0722175	0.047619
																		chr6	13716810	13718324	LTR12C:LTR:ERV1:+	0.0657538	0.0148475	0.401621
																		chr6	13743254	13744560	LTR12C:LTR:ERV1:+	0.0359578	0.0469512	0.00695733
																		chr6	13772546	13773854	LTR12C:LTR:ERV1:+	0.00825784	0.0360847	0.0885417
																		chr6	14002484	14003874	LTR12C:LTR:ERV1:+	0.0300325	0.00827664	0.0546296
																		chr6	14018073	14019354	LTR12C:LTR:ERV1:+	0.158634	0.0715695	0.156818
																		chr6	14782950	14784348	LTR12C:LTR:ERV1:-	0.0428689	0.00934799	0.175488
																		chr6	14916040	14917384	LTR12C:LTR:ERV1:+	0.00801987	0.0147659	0.124065
																		chr6	15758013	15759552	LTR12C:LTR:ERV1:-	0.193567	0.438442	0.679434
																		chr6	16039728	16041104	LTR12C:LTR:ERV1:-	0.754691	0.706534	0.843967
																		chr6	16068632	16069982	LTR12C:LTR:ERV1:-	0.011786	0.00271003	0.24254
																		chr6	16180234	16181508	LTR12C:LTR:ERV1:-	0.00329768	0.00310347	0.0280702
																		chr6	16226289	16227705	LTR12C:LTR:ERV1:-	0.09168	0.117436	0.180556
																		chr6	16288313	16289549	LTR12C:LTR:ERV1:+	0.031279	0.017033	0.0310374
																		chr6	17580778	17582202	LTR12C:LTR:ERV1:+	0.0599389	0.00505952	0
																		chr6	17728821	17730055	LTR12C:LTR:ERV1:+	0.0736656	0.0292244	0.0702437
																		chr6	17744507	17746098	LTR12C:LTR:ERV1:-	0.318381	0.174941	0.102632
																		chr6	17975549	17976980	LTR12C:LTR:ERV1:-	0.0354448	0.00809524	0.0414079
																		chr6	18010535	18011979	LTR12C:LTR:ERV1:-	0.0457796	0.0343842	0.0167411
																		chr6	18020110	18021412	LTR12C:LTR:ERV1:+	0.0408308	0.15308	0.0157297
																		chr6	19806378	19807762	LTR12C:LTR:ERV1:-	0.897513	0.762953	0.159993
																		chr6	20032404	20033698	LTR12C:LTR:ERV1:+	0.0415852	0.0459056	0.0533333
																		chr6	20233268	20234788	LTR12C:LTR:ERV1:+	0.338564	0.222209	0.56327
																		chr6	20239113	20240334	LTR12C:LTR:ERV1:+	0.129251	0.0561488	0.179121
																		chr6	20244033	20245564	LTR12C:LTR:ERV1:-	0.390064	0.179343	0.563441
																		chr6	20259620	20260993	LTR12C:LTR:ERV1:+	0.219578	0.146631	0.299055
																		chr6	20301311	20302771	LTR12C:LTR:ERV1:+	0.168191	0.11495	0.290971
																		chr6	20318968	20320273	LTR12C:LTR:ERV1:+	0.0703577	0.030345	0.261905
																		chr6	21550892	21553078	LTR12C:LTR:ERV1:-	0.498323	0.484536	0.51666
																		chr6	21609353	21610656	LTR12C:LTR:ERV1:-	0.0841517	0.080257	0
																		chr6	21761208	21762679	LTR12C:LTR:ERV1:+	0.0547714	0.0386781	0.478009
																		chr6	22355498	22357199	LTR12C:LTR:ERV1:-	0.938459	0.901658	0.649773
																		chr6	24765339	24766727	LTR12C:LTR:ERV1:-	0.27317	0.186512	0.127921
																		chr6	27012882	27014243	LTR12C:LTR:ERV1:+	0.0278106	0.0107131	0.43288
																		chr6	27347954	27349401	LTR12C:LTR:ERV1:-	0.0433274	0.0195285	0.0857143
																		chr6	27391751	27393171	LTR12C:LTR:ERV1:-	0.0635847	0.0108948	0.0433983
																		chr6	28436268	28437694	LTR12C:LTR:ERV1:-	0.122331	0.0272727	0.227284
																		chr6	33470323	33471803	LTR12C:LTR:ERV1:+	0.894718	0.860968	0.66543
																		chr6	33488341	33489817	LTR12C:LTR:ERV1:-	0.157921	0.179791	0.07526
																		chr6	33500000	33501499	LTR12C:LTR:ERV1:+	0.440855	0.232731	0.330421
																		chr6	33984136	33985487	LTR12C:LTR:ERV1:-	0.147341	0.164132	0.348489
																		chr6	34236619	34237912	LTR12C:LTR:ERV1:+	0.114854	0.0506588	0.156933
																		chr6	35898862	35900262	LTR12C:LTR:ERV1:+	0.145718	0.0552606	0.139082
																		chr6	36330911	36332572	LTR12C:LTR:ERV1:-	0.531289	0.346284	0.447116
																		chr6	38091432	38092658	LTR12C:LTR:ERV1:-	0.952408	0.948269	0.719745
																		chr6	43965652	43967018	LTR12C:LTR:ERV1:+	0.824421	0.698623	0.0914683
																		chr6	46372782	46374066	LTR12C:LTR:ERV1:-	0.0489841	0.00815796	0.0881481
																		chr6	46742155	46743701	LTR12C:LTR:ERV1:+	0.0697905	0.0826292	0.148333
																		chr6	49242900	49244151	LTR12C:LTR:ERV1:+	0.955165	0.956796	0.796506
																		chr6	49596127	49597827	LTR12C:LTR:ERV1:-	0.215397	0.100012	0.493857
																		chr6	52651130	52652642	LTR12C:LTR:ERV1:+	0.761426	0.72332	0.723889
																		chr6	52693134	52694539	LTR12C:LTR:ERV1:-	0.580729	0.498101	0.618855
																		chr6	53227263	53228805	LTR12C:LTR:ERV1:-	0.0365141	0.00575671	0.276935
																		chr6	54843852	54845402	LTR12C:LTR:ERV1:+	0.607353	0.515246	0.300457
																		chr6	55814933	55816640	LTR12C:LTR:ERV1:+	0.926359	0.926627	0.703635
																		chr6	63983878	63985398	LTR12C:LTR:ERV1:-	0.0838021	0.0264017	0.382633
																		chr6	64035502	64036922	LTR12C:LTR:ERV1:-	0.934237	0.867217	0.520756
																		chr6	64151788	64153400	LTR12C:LTR:ERV1:-	0.88158	0.539829	0.463302
																		chr6	64733501	64734836	LTR12C:LTR:ERV1:+	0.724057	0.490278	0.577723
																		chr6	64740884	64742224	LTR12C:LTR:ERV1:+	0.898334	0.898043	0.567989
																		chr6	66337238	66338760	LTR12C:LTR:ERV1:+	0.316356	0.348777	0.450178
																		chr6	66708483	66709809	LTR12C:LTR:ERV1:-	0.116641	0.0367061	0.70216
																		chr6	67658926	67660531	LTR12C:LTR:ERV1:+	0.118499	0.151504	0.193333
																		chr6	68432760	68434290	LTR12C:LTR:ERV1:+	0.910398	0.85803	0.756838
																		chr6	68535113	68536635	LTR12C:LTR:ERV1:+	0.785877	0.710046	0.476912
																		chr6	69243144	69244248	LTR12C:LTR:ERV1:+	0.155273	0.0512159	0.508709
																		chr6	70176912	70178513	LTR12C:LTR:ERV1:+	0.714444	0.524344	0.547356
																		chr6	72395686	72397073	LTR12C:LTR:ERV1:+	0.200587	0.208027	0.631737
																		chr6	73977770	73979159	LTR12C:LTR:ERV1:-	0.455692	0.427359	0.256001
																		chr6	74281266	74282822	LTR12C:LTR:ERV1:-	0.373591	0.439656	0.254879
																		chr6	74699524	74700910	LTR12C:LTR:ERV1:-	0.2142	0.11002	0.430404
																		chr6	78739334	78740894	LTR12C:LTR:ERV1:+	0.108972	0.0285474	0.151515
																		chr6	84746084	84747712	LTR12C:LTR:ERV1:-	0.918725	0.963544	0.744955
																		chr6	84898903	84900532	LTR12C:LTR:ERV1:+	0.925672	0.897039	0.246825
																		chr6	85296967	85298485	LTR12C:LTR:ERV1:+	0.840121	0.565684	0.663616
																		chr6	86035514	86037169	LTR12C:LTR:ERV1:+	0.217402	0.0745721	0.0898352
																		chr6	86993719	86995057	LTR12C:LTR:ERV1:-	0.697507	0.774826	0.786769
																		chr6	89774561	89776023	LTR12C:LTR:ERV1:+	0.743812	0.718833	0.0737619
																		chr6	89943332	89944729	LTR12C:LTR:ERV1:-	0.946878	0.911248	0.750681
																		chr6	92720459	92722025	LTR12C:LTR:ERV1:-	0.692406	0.571253	0.705772
																		chr6	93433042	93434724	LTR12C:LTR:ERV1:+	0.346786	0.245886	0.134921
																		chr6	93992183	93993530	LTR12C:LTR:ERV1:+	0.33944	0.296298	0.477778
																		chr6	96117743	96119211	LTR12C:LTR:ERV1:+	0.764366	0.369827	0.691074
																		chr6	96707832	96709385	LTR12C:LTR:ERV1:-	0.0951165	0.0220427	0.0352941
																		chr6	101276317	101277629	LTR12C:LTR:ERV1:-	0.0442961	0.0141389	0.270899
																		chr6	101517957	101519548	LTR12C:LTR:ERV1:+	0.861935	0.877877	0.87291
																		chr6	103357752	103359078	LTR12C:LTR:ERV1:-	0.288716	0.180821	0.0934524
																		chr6	104894030	104895510	LTR12C:LTR:ERV1:+	0.481901	0.469681	0.303753
																		chr6	107253458	107254829	LTR12C:LTR:ERV1:+	0.747173	0.522845	0.58403
																		chr6	107263547	107265203	LTR12C:LTR:ERV1:-	0.493235	0.271714	0.163921
																		chr6	107684461	107686013	LTR12C:LTR:ERV1:-	0.0507924	0.0600554	0.128211
																		chr6	110201583	110202933	LTR12C:LTR:ERV1:-	0.952747	0.935985	0.698488
																		chr6	114861830	114863411	LTR12C:LTR:ERV1:-	0.437096	0.269101	0.344965
																		chr6	116154501	116156327	LTR12C:LTR:ERV1:-	0.822612	0.815929	0.536303
																		chr6	116176188	116177781	LTR12C:LTR:ERV1:+	0.925227	0.892964	0.713092
																		chr6	116210087	116211469	LTR12C:LTR:ERV1:+	0.160881	0.0410972	0.0599225
																		chr6	116248176	116249765	LTR12C:LTR:ERV1:-	0.582793	0.205108	0.63554
																		chr6	117335741	117337160	LTR12C:LTR:ERV1:+	0.274007	0.109687	0.247118
																		chr6	117693600	117695003	LTR12C:LTR:ERV1:-	0.627312	0.254518	0.64869
																		chr6	119336307	119337855	LTR12C:LTR:ERV1:+	0.872969	0.850893	0.487109
																		chr6	119761995	119763583	LTR12C:LTR:ERV1:+	0.222071	0.133044	0.20069
																		chr6	122485334	122486766	LTR12C:LTR:ERV1:-	0.176742	0.0376124	0.559921
																		chr6	122601546	122603005	LTR12C:LTR:ERV1:+	0.0875056	0.0694793	0.0901235
																		chr6	123522930	123524547	LTR12C:LTR:ERV1:+	0.840484	0.833495	0.570168
																		chr6	125212937	125214527	LTR12C:LTR:ERV1:+	0.955218	0.932528	0.377473
																		chr6	125446817	125448259	LTR12C:LTR:ERV1:+	0.778682	0.390494	0.817314
																		chr6	125965414	125966843	LTR12C:LTR:ERV1:+	0.0945431	0.0391752	0.244643
																		chr6	127534911	127536299	LTR12C:LTR:ERV1:-	0.0656824	0.0373271	0.0318841
																		chr6	134954027	134955246	LTR12C:LTR:ERV1:-	0.0441338	0.0566939	0.464448
																		chr6	135225686	135227235	LTR12C:LTR:ERV1:+	0.246928	0.232418	0.0998016
																		chr6	140046648	140048049	LTR12C:LTR:ERV1:-	0.324621	0.47143	0.271339
																		chr6	140319853	140321282	LTR12C:LTR:ERV1:-	0.142023	0.0911077	0.166893
																		chr6	141361513	141363263	LTR12C:LTR:ERV1:-	0.852912	0.743302	0.579978
																		chr6	141939167	141940310	LTR12C:LTR:ERV1:+	0.181299	0.0602623	0.0451389
																		chr6	144815259	144816842	LTR12C:LTR:ERV1:-	0.759131	0.710169	0.135876
																		chr6	149018315	149019744	LTR12C:LTR:ERV1:-	0.247679	0.0802426	0.686996
																		chr6	153155294	153156793	LTR12C:LTR:ERV1:+	0.432999	0.346854	0.288243
																		chr6	153454575	153455955	LTR12C:LTR:ERV1:+	0.225663	0.103484	0.27807
																		chr6	154177094	154178609	LTR12C:LTR:ERV1:-	0.0761004	0.0469313	0.559143
																		chr6	155684008	155685535	LTR12C:LTR:ERV1:+	0.151061	0.0605355	0.411751
																		chr6	156187022	156188452	LTR12C:LTR:ERV1:-	0.290985	0.346378	0.183242
																		chr6	158629867	158631383	LTR12C:LTR:ERV1:-	0.101535	0.051368	0
																		chr6	160534786	160536096	LTR12C:LTR:ERV1:-	0.250483	0.346714	0.490671
																		chr6	165346607	165348092	LTR12C:LTR:ERV1:+	0.910254	0.920599	0.781715
																		chr6	165414369	165415626	LTR12C:LTR:ERV1:-	0.154826	0.0901934	0.558952
																		chr6	166177920	166179337	LTR12C:LTR:ERV1:-	0.099798	0.0302455	0.0355556
																		chr6	169142883	169144381	LTR12C:LTR:ERV1:-	0.0698898	0.0503529	0.197597
																		chr6	169879958	169881953	LTR12C:LTR:ERV1:+	0.87811	0.923378	0.634434
																		chr7	2015840	2017227	LTR12C:LTR:ERV1:-	0.857139	0.842636	0.708445
																		chr7	4352585	4354130	LTR12C:LTR:ERV1:-	0.169178	0.147024	0.329097
																		chr7	4832977	4834366	LTR12C:LTR:ERV1:+	0.662075	0.586889	0.0741703
																		chr7	5833039	5834518	LTR12C:LTR:ERV1:+	0.156884	0.045493	0.263479
																		chr7	7517108	7518736	LTR12C:LTR:ERV1:-	0.789414	0.79066	0.799117
																		chr7	9660242	9661639	LTR12C:LTR:ERV1:-	0.0601631	0.0379049	0.137963
																		chr7	11034232	11035716	LTR12C:LTR:ERV1:-	0.9471	0.956506	0.799737
																		chr7	12594827	12596347	LTR12C:LTR:ERV1:-	0.164107	0.0374554	0.0368421
																		chr7	16982440	16983709	LTR12C:LTR:ERV1:+	0.883335	0.897897	0.71258
																		chr7	19284924	19286590	LTR12C:LTR:ERV1:+	0.146155	0.0378058	0.235247
																		chr7	19731016	19732400	LTR12C:LTR:ERV1:-	0.85336	0.752762	0.631588
																		chr7	21575274	21576716	LTR12C:LTR:ERV1:-	0.892041	0.87833	0.778947
																		chr7	22068115	22069668	LTR12C:LTR:ERV1:+	0.421589	0.42135	0.534364
																		chr7	22071105	22072505	LTR12C:LTR:ERV1:-	0.482896	0.31528	0.69898
																		chr7	22129777	22131305	LTR12C:LTR:ERV1:+	0.679248	0.519509	0.411508
																		chr7	23232473	23233910	LTR12C:LTR:ERV1:-	0.547151	0.544301	0.0690476
																		chr7	27895666	27897193	LTR12C:LTR:ERV1:-	0.886327	0.594202	0.668368
																		chr7	33258404	33259733	LTR12C:LTR:ERV1:+	0.761411	0.634773	0.780856
																		chr7	37013166	37014710	LTR12C:LTR:ERV1:+	0.522058	0.357561	0.253843
																		chr7	38089205	38090417	LTR12C:LTR:ERV1:+	0.313149	0.18003	0.849403
																		chr7	39616869	39618410	LTR12C:LTR:ERV1:+	0.669248	0.551731	0.709585
																		chr7	39792653	39794092	LTR12C:LTR:ERV1:-	0.250332	0.207677	0.248616
																		chr7	47667893	47669313	LTR12C:LTR:ERV1:+	0.138194	0.105544	0.135808
																		chr7	48241365	48243076	LTR12C:LTR:ERV1:-	0.126976	0.0744876	0.197169
																		chr7	49493109	49494367	LTR12C:LTR:ERV1:+	0.846065	0.715071	0.718954
																		chr7	49750668	49752079	LTR12C:LTR:ERV1:+	0.427061	0.316547	0.782568
																		chr7	51873349	51874567	LTR12C:LTR:ERV1:+	0.102751	0.0038009	0.33475
																		chr7	52497918	52499489	LTR12C:LTR:ERV1:-	0.38935	0.236057	0.670087
																		chr7	53071454	53073061	LTR12C:LTR:ERV1:+	0.814092	0.755076	0.644062
																		chr7	53562532	53563953	LTR12C:LTR:ERV1:+	0.100956	0.0492768	0.221651
																		chr7	66828725	66830052	LTR12C:LTR:ERV1:-	0.513827	0.826296	0
																		chr7	67554374	67555967	LTR12C:LTR:ERV1:-	0.438284	0.196373	0.215046
																		chr7	68858633	68860014	LTR12C:LTR:ERV1:+	0.159281	0.13002	0.00740741
																		chr7	70502400	70503948	LTR12C:LTR:ERV1:+	0.2948	0.198283	0.351296
																		chr7	70542784	70543920	LTR12C:LTR:ERV1:+	0.0262873	0.00822511	0.722677
																		chr7	71202362	71203627	LTR12C:LTR:ERV1:-	0.393787	0.120003	0.0810967
																		chr7	75937965	75939317	LTR12C:LTR:ERV1:-	0.0668727	0.00640807	0.150301
																		chr7	79368434	79369865	LTR12C:LTR:ERV1:+	0.0681665	0.0734327	0.0445971
																		chr7	79396463	79397843	LTR12C:LTR:ERV1:-	0.270519	0.248068	0.114059
																		chr7	79605588	79607488	LTR12C:LTR:ERV1:-	0.824733	0.484676	0.363333
																		chr7	80671842	80673661	LTR12C:LTR:ERV1:+	0.890043	0.879901	0.455723
																		chr7	80685932	80687355	LTR12C:LTR:ERV1:-	0.940255	0.937454	0.589556
																		chr7	80700251	80701789	LTR12C:LTR:ERV1:+	0.758453	0.642376	0.665678
																		chr7	80770896	80772313	LTR12C:LTR:ERV1:+	0.218136	0.127926	0.282733
																		chr7	81065294	81066968	LTR12C:LTR:ERV1:-	0.232431	0.0851223	0.246929
																		chr7	82128755	82130076	LTR12C:LTR:ERV1:+	0.823147	0.665025	0.718196
																		chr7	83302451	83304054	LTR12C:LTR:ERV1:+	0.0332283	0.0128077	0.13426
																		chr7	84509703	84511052	LTR12C:LTR:ERV1:+	0.150232	0.16168	0.0515306
																		chr7	86069701	86071126	LTR12C:LTR:ERV1:+	0.0662285	0.0195113	0.184019
																		chr7	86917857	86919185	LTR12C:LTR:ERV1:+	0.85571	0.784368	0.428959
																		chr7	88857318	88858605	LTR12C:LTR:ERV1:-	0.358472	0.220487	0.290482
																		chr7	89963553	89964921	LTR12C:LTR:ERV1:+	0.111221	0.130845	0.0691799
																		chr7	91256050	91257271	LTR12C:LTR:ERV1:-	0.1604	0.0535818	0.00574713
																		chr7	91771856	91773202	LTR12C:LTR:ERV1:-	0.0880944	0.0635482	0.341915
																		chr7	93640497	93641734	LTR12C:LTR:ERV1:-	0.12346	0.0673816	0.446008
																		chr7	93730032	93731709	LTR12C:LTR:ERV1:+	0.876243	0.825067	0.698214
																		chr7	94334624	94336054	LTR12C:LTR:ERV1:+	0.113661	0.102886	0.563426
																		chr7	95181075	95182341	LTR12C:LTR:ERV1:-	0.662412	0.202618	0.28971
																		chr7	95234545	95235870	LTR12C:LTR:ERV1:+	0.883936	0.832274	0.463105
																		chr7	95857849	95859237	LTR12C:LTR:ERV1:+	0.915213	0.906617	0.71675
																		chr7	96663470	96665221	LTR12C:LTR:ERV1:+	0.859214	0.418843	0.743673
																		chr7	97170394	97171710	LTR12C:LTR:ERV1:+	0.893355	0.914171	0.719538
																		chr7	97471378	97472721	LTR12C:LTR:ERV1:-	0.849593	0.860306	0.761786
																		chr7	97565058	97566447	LTR12C:LTR:ERV1:+	0.322313	0.351547	0.237809
																		chr7	100991674	100993150	LTR12C:LTR:ERV1:+	0.295233	0.190323	0.0865556
																		chr7	102673823	102675213	LTR12C:LTR:ERV1:-	0.920132	0.917489	0.832256
																		chr7	102914526	102915934	LTR12C:LTR:ERV1:-	0.915206	0.878285	0.247787
																		chr7	103712054	103713457	LTR12C:LTR:ERV1:+	0.328322	0.251129	0.781013
																		chr7	104580421	104581877	LTR12C:LTR:ERV1:+	0.0960301	0.0130738	0.260324
																		chr7	105595491	105596761	LTR12C:LTR:ERV1:-	0.230206	0.193788	0.186984
																		chr7	106681947	106683326	LTR12C:LTR:ERV1:-	0.272165	0.179492	0.0276316
																		chr7	107528250	107529927	LTR12C:LTR:ERV1:+	0.732815	0.433646	0.566905
																		chr7	108296716	108298223	LTR12C:LTR:ERV1:-	0.315331	0.188692	0.0696649
																		chr7	111220973	111222562	LTR12C:LTR:ERV1:-	0.178159	0.0924872	0.351757
																		chr7	112657214	112658709	LTR12C:LTR:ERV1:+	0.126806	0.169872	0.379776
																		chr7	113127288	113128736	LTR12C:LTR:ERV1:-	0.696313	0.249694	0.36955
																		chr7	113233212	113234617	LTR12C:LTR:ERV1:+	0.150239	0.0821327	0.103736
																		chr7	113716038	113717461	LTR12C:LTR:ERV1:-	0.0811917	0.0549472	0
																		chr7	115821181	115822530	LTR12C:LTR:ERV1:-	0.186304	0.0574292	0
																		chr7	116637021	116638615	LTR12C:LTR:ERV1:-	0.906047	0.931026	0.89558
																		chr7	118497725	118499257	LTR12C:LTR:ERV1:-	0.192471	0.145103	0.081203
																		chr7	119590361	119592128	LTR12C:LTR:ERV1:-	0.18449	0.0660613	0.215238
																		chr7	120699841	120701243	LTR12C:LTR:ERV1:+	0.0723283	0.061775	0.030303
																		chr7	121061581	121063186	LTR12C:LTR:ERV1:+	0.480276	0.300366	0.748154
																		chr7	122312885	122314439	LTR12C:LTR:ERV1:-	0.0675729	0.0572757	0.209611
																		chr7	123402308	123403788	LTR12C:LTR:ERV1:-	0.231585	0.158336	0.319568
																		chr7	127069034	127070572	LTR12C:LTR:ERV1:+	0.871372	0.870254	0.682573
																		chr7	129869680	129871068	LTR12C:LTR:ERV1:+	0.0583596	0.0393284	0.235042
																		chr7	130743366	130744976	LTR12C:LTR:ERV1:+	0.896345	0.867994	0.709592
																		chr7	131593925	131595393	LTR12C:LTR:ERV1:+	0.0328776	0.032183	0.0148148
																		chr7	132582579	132583931	LTR12C:LTR:ERV1:-	0.253375	0.0432692	0.543747
																		chr7	137830726	137832185	LTR12C:LTR:ERV1:+	0.24214	0.0801961	0.104882
																		chr7	139970458	139971668	LTR12C:LTR:ERV1:-	0.0560432	0.0501339	0.0564103
																		chr7	140655768	140657307	LTR12C:LTR:ERV1:-	0.818367	0.611288	0.633789
																		chr7	143120308	143122051	LTR12C:LTR:ERV1:-	0.457485	0.378014	0.205282
																		chr7	144114151	144115554	LTR12C:LTR:ERV1:-	0.942585	0.898641	0.858522
																		chr7	144347342	144349095	LTR12C:LTR:ERV1:+	0.950705	0.91509	0.625053
																		chr7	145056637	145058291	LTR12C:LTR:ERV1:-	0.26306	0.165225	0.164109
																		chr7	145393686	145395025	LTR12C:LTR:ERV1:-	0.264867	0.289735	0.0601449
																		chr7	148060727	148062206	LTR12C:LTR:ERV1:+	0.579237	0.433196	0.628394
																		chr7	148123319	148124645	LTR12C:LTR:ERV1:+	0.832666	0.824693	0.547546
																		chr7	148645991	148647539	LTR12C:LTR:ERV1:+	0.667828	0.456634	0.189456
																		chr7	148734965	148736353	LTR12C:LTR:ERV1:-	0.417266	0.550517	0.078621
																		chr7	152235249	152236509	LTR12C:LTR:ERV1:-	0.0208451	0.0107569	0.153388
																		chr7	152426379	152427925	LTR12C:LTR:ERV1:-	0.538668	0.0775437	0.643629
																		chr7	155190217	155191408	LTR12C:LTR:ERV1:-	0.0651649	0.0587012	0.284866
																		chr7	156665755	156667262	LTR12C:LTR:ERV1:-	0.911568	0.915407	0.720594
																		chr7	157855080	157856517	LTR12C:LTR:ERV1:+	0.873236	0.942169	0.897583
																		chr7	158854987	158856376	LTR12C:LTR:ERV1:-	0.0316345	0.0252827	0.353638
																		chr8	80215546	80216767	LTR12C:LTR:ERV1:+	0.0593069	0.0144344	0.05
																		chr8	102891404	102892800	LTR12C:LTR:ERV1:-	0.244822	0.173786	0.744431
																		chr8	1454501	1455832	LTR12C:LTR:ERV1:-	0.280885	0.219427	0.614962
																		chr8	4440166	4441763	LTR12C:LTR:ERV1:+	0.420561	0.244857	0.546381
																		chr8	5901716	5903104	LTR12C:LTR:ERV1:-	0.726423	0.300115	0.786169
																		chr8	6010047	6011550	LTR12C:LTR:ERV1:+	0.168382	0.115205	0.630464
																		chr8	8638220	8639464	LTR12C:LTR:ERV1:-	0.0635318	0.0164241	0.0699861
																		chr8	9704594	9705829	LTR12C:LTR:ERV1:-	0.0478759	0.0779838	0.513127
																		chr8	11652131	11653498	LTR12C:LTR:ERV1:+	0.0796496	0.0261749	0.0763039
																		chr8	11879987	11881369	LTR12C:LTR:ERV1:+	0.75567	0.675883	0.633437
																		chr8	12530778	12532176	LTR12C:LTR:ERV1:+	0.689937	0.722721	0.696878
																		chr8	12653656	12654976	LTR12C:LTR:ERV1:+	0.146743	0.0957706	0.134336
																		chr8	13010577	13012263	LTR12C:LTR:ERV1:-	0.282602	0.264049	0.52027
																		chr8	14424148	14425539	LTR12C:LTR:ERV1:+	0.075226	0.0689287	0.770855
																		chr8	16617054	16618570	LTR12C:LTR:ERV1:-	0.845945	0.840806	0.712491
																		chr8	16641234	16642779	LTR12C:LTR:ERV1:+	0.0596627	0.0221262	0.197003
																		chr8	16893501	16894891	LTR12C:LTR:ERV1:-	0.962665	0.952171	0.80141
																		chr8	18524388	18525758	LTR12C:LTR:ERV1:-	0.0113267	0.0412257	0.0683333
																		chr8	19912120	19913569	LTR12C:LTR:ERV1:+	0.81317	0.670631	0.720925
																		chr8	21943891	21945324	LTR12C:LTR:ERV1:+	0.0101198	0.0441912	0.0302536
																		chr8	22927449	22928865	LTR12C:LTR:ERV1:-	0.0972545	0.0078125	0.0728015
																		chr8	23030445	23031865	LTR12C:LTR:ERV1:-	0.231446	0.122434	0.190267
																		chr8	23129448	23130684	LTR12C:LTR:ERV1:+	0.135379	0.0318564	0.1
																		chr8	25021829	25023375	LTR12C:LTR:ERV1:+	0.158737	0.0667418	0.431915
																		chr8	29161588	29162993	LTR12C:LTR:ERV1:+	0.907238	0.926734	0.75172
																		chr8	29168800	29170085	LTR12C:LTR:ERV1:+	0.951511	0.925762	0.534687
																		chr8	31100876	31102177	LTR12C:LTR:ERV1:-	0.143258	0.26253	0.218051
																		chr8	31347189	31348671	LTR12C:LTR:ERV1:+	0.903142	0.887642	0.648188
																		chr8	33431241	33432624	LTR12C:LTR:ERV1:+	0.0325456	0.00539733	0.043956
																		chr8	33490513	33491914	LTR12C:LTR:ERV1:-	0.422899	0.483756	0.241893
																		chr8	35886161	35887830	LTR12C:LTR:ERV1:+	0.92884	0.906008	0.557269
																		chr8	38577201	38578576	LTR12C:LTR:ERV1:+	0.0684387	0.00526417	0.105067
																		chr8	39037451	39039054	LTR12C:LTR:ERV1:+	0.53601	0.423608	0.725695
																		chr8	42430184	42431639	LTR12C:LTR:ERV1:+	0.942864	0.888583	0.779216
																		chr8	42454290	42455755	LTR12C:LTR:ERV1:-	0.898993	0.906566	0.96219
																		chr8	42544454	42545871	LTR12C:LTR:ERV1:+	0.122646	0.10624	0.0855556
																		chr8	42641736	42643142	LTR12C:LTR:ERV1:+	0.418293	0.250653	0.502718
																		chr8	47243174	47244714	LTR12C:LTR:ERV1:+	0.625162	0.802735	0.521724
																		chr8	50014733	50016141	LTR12C:LTR:ERV1:-	0.632893	0.455468	0.607498
																		chr8	50987247	50988575	LTR12C:LTR:ERV1:+	0.202251	0.167066	0.302792
																		chr8	52183612	52185055	LTR12C:LTR:ERV1:+	0.927775	0.474015	0.725689
																		chr8	52289888	52291536	LTR12C:LTR:ERV1:+	0.324805	0.19263	0.707908
																		chr8	52316371	52317902	LTR12C:LTR:ERV1:-	0.607292	0.521127	0.400248
																		chr8	53864270	53865982	LTR12C:LTR:ERV1:-	0.935074	0.734983	0.764935
																		chr8	53866200	53867682	LTR12C:LTR:ERV1:+	0.919905	0.735726	0.774524
																		chr8	53873781	53875118	LTR12C:LTR:ERV1:+	0.934557	0.766489	0.564756
																		chr8	53881626	53882971	LTR12C:LTR:ERV1:-	0.385147	0.2	0.357086
																		chr8	53982816	53984251	LTR12C:LTR:ERV1:-	0.754845	0.829969	0.760287
																		chr8	53989274	53990743	LTR12C:LTR:ERV1:-	0.756422	0.72634	0.72702
																		chr8	54687525	54689024	LTR12C:LTR:ERV1:-	0.0525472	0.0768036	0.28286
																		chr8	55016653	55018059	LTR12C:LTR:ERV1:+	0.919237	0.627948	0.0504534
																		chr8	60459507	60460937	LTR12C:LTR:ERV1:+	0.622949	0.217795	0.591567
																		chr8	60673656	60675051	LTR12C:LTR:ERV1:-	0.696256	0.268405	0.738995
																		chr8	60912240	60913695	LTR12C:LTR:ERV1:+	0.891051	0.923755	0.683524
																		chr8	61064514	61066088	LTR12C:LTR:ERV1:-	0.941927	0.858652	0.924443
																		chr8	64038486	64039840	LTR12C:LTR:ERV1:+	0.263036	0.101159	0.209965
																		chr8	64074367	64075872	LTR12C:LTR:ERV1:+	0.870838	0.610553	0.170664
																		chr8	66888995	66890570	LTR12C:LTR:ERV1:-	0.883189	0.862467	0.724878
																		chr8	68542786	68544298	LTR12C:LTR:ERV1:+	0.251634	0.0997941	0.755046
																		chr8	70537605	70539264	LTR12C:LTR:ERV1:-	0.472154	0.353042	0.0619898
																		chr8	75090795	75092315	LTR12C:LTR:ERV1:-	0.317154	0.254126	0.700357
																		chr8	76576616	76578264	LTR12C:LTR:ERV1:-	0.334193	0.44067	0.0687669
																		chr8	76971710	76973073	LTR12C:LTR:ERV1:-	0.879114	0.847028	0.717293
																		chr8	77081661	77083493	LTR12C:LTR:ERV1:+	0.787324	0.458381	0.215252
																		chr8	77358983	77360413	LTR12C:LTR:ERV1:-	0.188634	0.097612	0.115263
																		chr8	80288621	80290022	LTR12C:LTR:ERV1:-	0.0450148	0.033465	0.134131
																		chr8	81143860	81145703	LTR12C:LTR:ERV1:+	0.043999	0.0224232	0.0989704
																		chr8	83103545	83105040	LTR12C:LTR:ERV1:-	0.459119	0.481975	0.108333
																		chr8	83353475	83355064	LTR12C:LTR:ERV1:+	0.0812558	0.0238158	0.0736772
																		chr8	83792741	83794113	LTR12C:LTR:ERV1:+	0.780598	0.61078	0.72619
																		chr8	84314992	84316286	LTR12C:LTR:ERV1:+	0.0935758	0.057276	0.0519481
																		chr8	84605459	84606754	LTR12C:LTR:ERV1:-	0.0791212	0.0425819	0.774957
																		chr8	86064735	86066329	LTR12C:LTR:ERV1:+	0.866039	0.9074	0.681672
																		chr8	86188109	86189787	LTR12C:LTR:ERV1:+	0.465533	0.301024	0.438519
																		chr8	88983200	88984573	LTR12C:LTR:ERV1:+	0.178057	0.152857	0.0911111
																		chr8	92828409	92829959	LTR12C:LTR:ERV1:+	0.733208	0.58231	0.388918
																		chr8	93242838	93244509	LTR12C:LTR:ERV1:+	0.808485	0.729664	0.739451
																		chr8	93440651	93442012	LTR12C:LTR:ERV1:-	0.837923	0.798882	0.773115
																		chr8	95311743	95313126	LTR12C:LTR:ERV1:-	0.910504	0.920124	0.427143
																		chr8	96835684	96837359	LTR12C:LTR:ERV1:+	0.562611	0.168502	0.395599
																		chr8	97464366	97465716	LTR12C:LTR:ERV1:+	0.197172	0.102976	0.627083
																		chr8	97545162	97546605	LTR12C:LTR:ERV1:-	0.88929	0.909361	0.907653
																		chr8	97730459	97731878	LTR12C:LTR:ERV1:-	0.36775	0.11733	0.352422
																		chr8	98568971	98570063	LTR12C:LTR:ERV1:+	0.0653122	0.0341687	0.0438714
																		chr8	99812642	99814008	LTR12C:LTR:ERV1:+	0.951239	0.92501	0.786196
																		chr8	100174642	100176190	LTR12C:LTR:ERV1:-	0.909131	0.920984	0.264071
																		chr8	101328176	101329579	LTR12C:LTR:ERV1:-	0.364716	0.265942	0.257151
																		chr8	101968722	101969899	LTR12C:LTR:ERV1:-	0.769142	0.511343	0.705
																		chr8	103496875	103498303	LTR12C:LTR:ERV1:-	0.498905	0.365843	0.182437
																		chr8	105644106	105645667	LTR12C:LTR:ERV1:-	0.705885	0.773791	0.440535
																		chr8	106398615	106400081	LTR12C:LTR:ERV1:-	0.358517	0.302454	0.214761
																		chr8	108667660	108669156	LTR12C:LTR:ERV1:+	0.893705	0.828355	0.714172
																		chr8	111213990	111215362	LTR12C:LTR:ERV1:-	0.466341	0.229587	0.0550505
																		chr8	112052338	112053630	LTR12C:LTR:ERV1:-	0.000507099	0.0015873	0.00520833
																		chr8	112654916	112656446	LTR12C:LTR:ERV1:+	0.923891	0.568104	0.863316
																		chr8	112770137	112771540	LTR12C:LTR:ERV1:-	0.251568	0.202605	0.744728
																		chr8	112834596	112836077	LTR12C:LTR:ERV1:-	0.0991556	0.0416315	0.403413
																		chr8	113094448	113095725	LTR12C:LTR:ERV1:-	0.576417	0.0921098	0.554475
																		chr8	113144738	113146048	LTR12C:LTR:ERV1:+	0.0640505	0.0323835	0.0974596
																		chr8	115323398	115324824	LTR12C:LTR:ERV1:+	0.0553082	0.0616477	0.00555556
																		chr8	116048763	116050114	LTR12C:LTR:ERV1:+	0.532311	0.449321	0.791637
																		chr8	116341946	116343348	LTR12C:LTR:ERV1:-	0.708823	0.487218	0.671451
																		chr8	117543144	117544491	LTR12C:LTR:ERV1:+	0.0482849	0.0118589	0.0997024
																		chr8	117961183	117962538	LTR12C:LTR:ERV1:-	0.252694	0.255159	0.107939
																		chr8	122678728	122680216	LTR12C:LTR:ERV1:-	0.739484	0.257632	0.201259
																		chr8	127725855	127727444	LTR12C:LTR:ERV1:-	0.0492372	0.0429101	0.627029
																		chr8	133261148	133262459	LTR12C:LTR:ERV1:-	0.673613	0.551795	0.701578
																		chr8	136701778	136703188	LTR12C:LTR:ERV1:-	0.0477913	0.0522225	0.230511
																		chr8	137805313	137806597	LTR12C:LTR:ERV1:-	0.0327255	0.0202782	0.0558214
																		chr8	138766502	138767924	LTR12C:LTR:ERV1:-	0.83139	0.785795	0.377753
																		chr8	139096196	139097938	LTR12C:LTR:ERV1:+	0.34652	0.609469	0.11119
																		chr8	142086603	142088117	LTR12C:LTR:ERV1:+	0.932765	0.851983	0.407696
																		chr8	144040713	144042296	LTR12C:LTR:ERV1:+	0.244312	0.13012	0.577482
																		chr8	146100381	146101985	LTR12C:LTR:ERV1:+	0.944507	0.916114	0.366607
																		chr9	579965	581312	LTR12C:LTR:ERV1:-	0.891831	0.884256	0.694254
																		chr9	3733630	3734981	LTR12C:LTR:ERV1:+	0.0572782	0.012828	0.10295
																		chr9	4195125	4196801	LTR12C:LTR:ERV1:+	0.795309	0.689773	0.54073
																		chr9	10835785	10837078	LTR12C:LTR:ERV1:+	0.864603	0.742121	0.738667
																		chr9	11196696	11198274	LTR12C:LTR:ERV1:+	0.687194	0.499024	0.474405
																		chr9	11927875	11929417	LTR12C:LTR:ERV1:-	0.943679	0.916705	0.698313
																		chr9	15699015	15700603	LTR12C:LTR:ERV1:-	0.790275	0.647729	0.300881
																		chr9	15809377	15810955	LTR12C:LTR:ERV1:-	0.602479	0.82231	0.522789
																		chr9	16480324	16481616	LTR12C:LTR:ERV1:+	0.567027	0.61161	0.403236
																		chr9	16875959	16877616	LTR12C:LTR:ERV1:-	0.909123	0.882922	0.603571
																		chr9	16923497	16924970	LTR12C:LTR:ERV1:-	0.76079	0.453439	0.786935
																		chr9	17072421	17074112	LTR12C:LTR:ERV1:+	0.434331	0.294821	0.257525
																		chr9	17177445	17178945	LTR12C:LTR:ERV1:-	0.399913	0.587026	0.473751
																		chr9	17293939	17295391	LTR12C:LTR:ERV1:-	0.609973	0.596982	0.433995
																		chr9	17353751	17355177	LTR12C:LTR:ERV1:+	0.0868852	0.0236353	0.425828
																		chr9	21959074	21960296	LTR12C:LTR:ERV1:+	0.0725365	0.018694	0.167381
																		chr9	22362353	22364027	LTR12C:LTR:ERV1:-	0.52039	0.696158	0.382265
																		chr9	23451851	23453232	LTR12C:LTR:ERV1:+	0.606235	0.528855	0.605661
																		chr9	23913478	23914975	LTR12C:LTR:ERV1:-	0.917156	0.876737	0.771429
																		chr9	24134902	24136313	LTR12C:LTR:ERV1:+	0.157605	0.0941384	0.316322
																		chr9	24738350	24739911	LTR12C:LTR:ERV1:+	0.266725	0.171551	0.4806
																		chr9	27092470	27093898	LTR12C:LTR:ERV1:+	0.134447	0.0729458	0.539741
																		chr9	30299074	30300656	LTR12C:LTR:ERV1:+	0.922597	0.783492	0.798038
																		chr9	34437740	34439261	LTR12C:LTR:ERV1:+	0.522729	0.54741	0.116321
																		chr9	34481500	34483340	LTR12C:LTR:ERV1:-	0.628589	0.617663	0.247751
																		chr9	34739469	34740712	LTR12C:LTR:ERV1:-	0.42059	0.246878	0.247851
																		chr9	38075186	38077010	LTR12C:LTR:ERV1:+	0.503522	0.126423	0.106541
																		chr9	38377391	38378809	LTR12C:LTR:ERV1:+	0.0699742	0.0433401	0.152024
																		chr9	39041528	39042917	LTR12C:LTR:ERV1:-	0.149125	0.144062	0.37528
																		chr9	71231757	71233083	LTR12C:LTR:ERV1:+	0.0137468	0.0171958	0.154137
																		chr9	74578272	74579651	LTR12C:LTR:ERV1:+	0.329221	0.175238	0.231779
																		chr9	75094278	75095677	LTR12C:LTR:ERV1:-	0.117704	0.268244	0.516997
																		chr9	76889996	76891411	LTR12C:LTR:ERV1:-	0.0351673	0.019493	0.347619
																		chr9	79137834	79139169	LTR12C:LTR:ERV1:-	0.615553	0.2779	0.0900952
																		chr9	80104417	80105864	LTR12C:LTR:ERV1:-	0.571702	0.398418	0.787937
																		chr9	81024730	81026228	LTR12C:LTR:ERV1:+	0.954633	0.937152	0.602052
																		chr9	81056811	81058210	LTR12C:LTR:ERV1:+	0.130671	0.0346481	0.234921
																		chr9	82799414	82800774	LTR12C:LTR:ERV1:-	0.518854	0.257131	0.773046
																		chr9	84122117	84123694	LTR12C:LTR:ERV1:+	0.4457	0.316126	0.288115
																		chr9	84668373	84669810	LTR12C:LTR:ERV1:-	0.938869	0.899909	0.424739
																		chr9	85707188	85708785	LTR12C:LTR:ERV1:-	0.440145	0.237297	0.588393
																		chr9	87023221	87024730	LTR12C:LTR:ERV1:+	0.0939057	0.0149676	0.190067
																		chr9	87903780	87905378	LTR12C:LTR:ERV1:+	0.105957	0.0458629	0.612758
																		chr9	91299987	91301384	LTR12C:LTR:ERV1:-	0.174881	0.107241	0.444405
																		chr9	91824136	91825666	LTR12C:LTR:ERV1:+	0.623773	0.448053	0.493526
																		chr9	91897163	91898584	LTR12C:LTR:ERV1:+	0.241567	0.224396	0.2167
																		chr9	92094402	92095898	LTR12C:LTR:ERV1:-	0.57502	0.462323	0.214583
																		chr9	92295819	92297412	LTR12C:LTR:ERV1:+	0.0387139	0.0469862	0.60897
																		chr9	93491556	93492834	LTR12C:LTR:ERV1:+	0.793755	0.464652	0.813299
																		chr9	98442429	98443811	LTR12C:LTR:ERV1:+	0.320204	0.291895	0.39064
																		chr9	98763135	98764565	LTR12C:LTR:ERV1:-	0.89046	0.874944	0.662827
																		chr9	99461929	99463766	LTR12C:LTR:ERV1:-	0.774034	0.824157	0.431782
																		chr9	100336318	100337737	LTR12C:LTR:ERV1:+	0.0297086	0.020702	0.0463235
																		chr9	101753086	101754943	LTR12C:LTR:ERV1:-	0.908718	0.893279	0.603975
																		chr9	104485407	104486958	LTR12C:LTR:ERV1:-	0.491124	0.577583	0.186022
																		chr9	105248249	105249784	LTR12C:LTR:ERV1:-	0.0821972	0.107131	0.307698
																		chr9	105949013	105950391	LTR12C:LTR:ERV1:+	0.411441	0.182039	0.634133
																		chr9	106245822	106247105	LTR12C:LTR:ERV1:+	0.314965	0.144635	0.487978
																		chr9	106962705	106964343	LTR12C:LTR:ERV1:+	0.891896	0.936476	0.676429
																		chr9	107124178	107125737	LTR12C:LTR:ERV1:-	0.890169	0.665735	0.749093
																		chr9	109262722	109264128	LTR12C:LTR:ERV1:-	0.718381	0.426496	0.196606
																		chr9	110579892	110581274	LTR12C:LTR:ERV1:+	0.021291	0.0036855	0.22398
																		chr9	111292243	111293597	LTR12C:LTR:ERV1:+	0.379093	0.370605	0.297955
																		chr9	120614122	120615510	LTR12C:LTR:ERV1:+	0.243901	0.189041	0.467778
																		chr9	121570694	121572057	LTR12C:LTR:ERV1:-	0.155223	0.0479979	0.00268817
																		chr9	122631620	122633125	LTR12C:LTR:ERV1:-	0.13631	0.102881	0.29483
																		chr9	123508613	123509770	LTR12C:LTR:ERV1:+	0.0609389	0.0630609	0.0744937
																		chr9	125167511	125168998	LTR12C:LTR:ERV1:-	0.21477	0.0949427	0.0819444
																		chr9	127600030	127601565	LTR12C:LTR:ERV1:-	0.149537	0.190764	0.03
																		chr9	133785324	133786744	LTR12C:LTR:ERV1:+	0.385237	0.234063	0.211555
																		chr9	137882023	137883425	LTR12C:LTR:ERV1:-	0.10119	0.0526796	0.479464
																		chrX	6607606	6609113	LTR12C:LTR:ERV1:-	0.481026	0.335655	0.419697
																		chrX	7970351	7971824	LTR12C:LTR:ERV1:-	0.960246	0.961748	0.969444
																		chrX	15248872	15250417	LTR12C:LTR:ERV1:-	0.472662	0.363295	0.270357
																		chrX	16593394	16594839	LTR12C:LTR:ERV1:+	0.405683	0.330265	0.189544
																		chrX	18101740	18103287	LTR12C:LTR:ERV1:+	0.813339	0.827205	0.371289
																		chrX	27174938	27177085	LTR12C:LTR:ERV1:+	0.911957	0.913369	0.633851
																		chrX	39134688	39136093	LTR12C:LTR:ERV1:+	0.94015	0.715103	0.638095
																		chrX	62405282	62406869	LTR12C:LTR:ERV1:+	0.745298	0.743698	0.608277
																		chrX	74398288	74399918	LTR12C:LTR:ERV1:-	0.847833	0.818511	0.737188
																		chrX	85226260	85227925	LTR12C:LTR:ERV1:-	0.145125	0.2044	0.448854
																		chrX	89219619	89221209	LTR12C:LTR:ERV1:-	0.332059	0.232213	0.314583
																		chrX	89776152	89777516	LTR12C:LTR:ERV1:+	0.557967	0.310705	0.616883
																		chrX	98626231	98627576	LTR12C:LTR:ERV1:-	0.0960875	0.143216	0
																		chrX	108991223	108993114	LTR12C:LTR:ERV1:-	0.838069	0.856646	0.619048
																		chrX	112097362	112098648	LTR12C:LTR:ERV1:-	0.734207	0.648308	0.06
																		chrX	113512786	113514348	LTR12C:LTR:ERV1:-	0.783115	0.649452	0.33
																		chrX	118055122	118056514	LTR12C:LTR:ERV1:-	0.0819724	0.0556052	0.117999
																		chrX	118467378	118468825	LTR12C:LTR:ERV1:+	0.802377	0.847271	0.112245
																		chrX	119024381	119025800	LTR12C:LTR:ERV1:+	0.608065	0.451123	0.010101
																		chrX	120564398	120565944	LTR12C:LTR:ERV1:-	0.949841	0.9675	0.594872
																		chrX	124288447	124289873	LTR12C:LTR:ERV1:-	0.125012	0.0839683	0.183168
																		chrX	124823747	124825136	LTR12C:LTR:ERV1:-	0.813613	0.572318	0.112222
																		chrX	132178222	132179878	LTR12C:LTR:ERV1:+	0.921752	0.893358	0.538855
																		chrX	134059524	134060722	LTR12C:LTR:ERV1:+	0.925839	0.728504	0.846495
																		chrX	136003407	136004915	LTR12C:LTR:ERV1:+	0.646582	0.166638	0.603968
																		chrX	141385146	141386597	LTR12C:LTR:ERV1:-	0.472863	0.501243	0.174405
																		chrX	141832405	141834075	LTR12C:LTR:ERV1:-	0.897096	0.78547	0.7625
																		chrX	142808179	142809867	LTR12C:LTR:ERV1:-	0.912251	0.891918	0.771062
																		chrX	143864971	143866666	LTR12C:LTR:ERV1:+	0.885914	0.706733	0.576429
																		chrX	145947376	145948961	LTR12C:LTR:ERV1:-	0.437421	0.32579	0.501948
																		chrX	148840056	148841607	LTR12C:LTR:ERV1:+	0.321699	0.159953	0.258775
																		chrX	150718826	150720229	LTR12C:LTR:ERV1:-	0.916374	0.920581	0.423077
																		chrX	150722897	150724187	LTR12C:LTR:ERV1:-	0.969948	0.945047	0.764815
																		chrX	150730230	150731816	LTR12C:LTR:ERV1:-	0.55037	0.660547	0.773333
																		chrY	4438731	4440235	LTR12C:LTR:ERV1:+	0.332648	0.139394	0.675505
																		chrY	5683387	5684807	LTR12C:LTR:ERV1:-	0.88815	0.914449	0.677814
																		chrY	7995730	7997121	LTR12C:LTR:ERV1:-	0.12622	0.175498	0.847917
																		chrY	16624512	16625807	LTR12C:LTR:ERV1:+	0.807107	0.684483	0.525357
																		chrY	19154804	19156196	LTR12C:LTR:ERV1:+	0.251913	0.08597	0.397751
																		chrY	23568902	23570393	LTR12C:LTR:ERV1:+	0.0502289	0.04897	0.133333
																		chrY	23837729	23839113	LTR12C:LTR:ERV1:-	0.0762566	0.0288462	0.180995
																		chr10	122683153	122684479	LTR12C:LTR:ERV1:+	0.0965339	0.0390675	0.0864324
																		chr10	125042006	125043434	LTR12C:LTR:ERV1:-	0.0833605	0.0102536	0.116245
																		chr10	3360984	3362575	LTR12C:LTR:ERV1:-	0.786083	0.71408	0.618779
																		chr10	4886232	4887672	LTR12C:LTR:ERV1:-	0.488905	0.618701	0.453732
																		chr10	4978791	4980137	LTR12C:LTR:ERV1:-	0.913087	0.913275	0.849524
																		chr10	5094171	5095855	LTR12C:LTR:ERV1:-	0.853695	0.934904	0.660325
																		chr10	9225129	9226520	LTR12C:LTR:ERV1:+	0.153757	0.0807863	0.0652227
																		chr10	10202691	10204298	LTR12C:LTR:ERV1:+	0.893316	0.862389	0.79596
																		chr10	13301418	13302838	LTR12C:LTR:ERV1:+	0.866971	0.745828	0.392155
																		chr10	15467196	15468639	LTR12C:LTR:ERV1:-	0.0407744	0.000766284	0.097371
																		chr10	15576784	15578189	LTR12C:LTR:ERV1:+	0.0901579	0.0166264	0.426327
																		chr10	19239554	19240773	LTR12C:LTR:ERV1:-	0.185564	0.13183	0.0654495
																		chr10	24464502	24466183	LTR12C:LTR:ERV1:-	0.924392	0.933374	0.828848
																		chr10	26044745	26045949	LTR12C:LTR:ERV1:+	0.0472299	0.0415889	0.120228
																		chr10	27194301	27196045	LTR12C:LTR:ERV1:+	0.461317	0.331485	0.471996
																		chr10	27545220	27546862	LTR12C:LTR:ERV1:+	0.0706502	0.0296533	0.0952381
																		chr10	29103948	29105158	LTR12C:LTR:ERV1:-	0.11409	0.0449669	0.0647321
																		chr10	29654940	29656605	LTR12C:LTR:ERV1:+	0.258755	0.119449	0.304237
																		chr10	30451600	30452988	LTR12C:LTR:ERV1:+	0.156713	0.0653451	0.36761
																		chr10	31057293	31058906	LTR12C:LTR:ERV1:-	0.822599	0.825556	0.699434
																		chr10	31190653	31192282	LTR12C:LTR:ERV1:-	0.572258	0.490854	0.911936
																		chr10	31218122	31219525	LTR12C:LTR:ERV1:-	0.930456	0.914774	0.696508
																		chr10	31344571	31346257	LTR12C:LTR:ERV1:+	0.405318	0.130952	0.43204
																		chr10	33302037	33303452	LTR12C:LTR:ERV1:+	0.189489	0.0865429	0.221828
																		chr10	33337968	33339616	LTR12C:LTR:ERV1:+	0.0623363	0.0238098	0.0979386
																		chr10	33756778	33758330	LTR12C:LTR:ERV1:+	0.126313	0.0990207	0.430801
																		chr10	33768663	33769957	LTR12C:LTR:ERV1:-	0.0554611	0.032352	0.239314
																		chr10	34324148	34325659	LTR12C:LTR:ERV1:+	0.912254	0.800462	0.731165
																		chr10	34344299	34345585	LTR12C:LTR:ERV1:+	0.0349654	0.0259177	0.155568
																		chr10	36770209	36771489	LTR12C:LTR:ERV1:-	0.677512	0.588856	0.746091
																		chr10	37022563	37024110	LTR12C:LTR:ERV1:-	0.508298	0.344038	0.357528
																		chr10	37037067	37038517	LTR12C:LTR:ERV1:+	0.903126	0.8465	0.724462
																		chr10	37108683	37110095	LTR12C:LTR:ERV1:+	0.926356	0.796436	0.779102
																		chr10	37277323	37278773	LTR12C:LTR:ERV1:-	0.80237	0.575375	0.788214
																		chr10	37563348	37564808	LTR12C:LTR:ERV1:-	0.934594	0.90539	0.689758
																		chr10	37573084	37574650	LTR12C:LTR:ERV1:-	0.894095	0.909145	0.78935
																		chr10	38026129	38027642	LTR12C:LTR:ERV1:+	0.906187	0.878934	0.45881
																		chr10	46096025	46097385	LTR12C:LTR:ERV1:+	0.171706	0.162548	0.0221861
																		chr10	55683757	55685297	LTR12C:LTR:ERV1:+	0.568182	0.477901	0.607336
																		chr10	55750396	55752147	LTR12C:LTR:ERV1:+	0.948939	0.831947	0.660498
																		chr10	57914699	57916149	LTR12C:LTR:ERV1:+	0.132996	0.0733028	0.216384
																		chr10	59009415	59010680	LTR12C:LTR:ERV1:+	0.103656	0.0583707	0.198407
																		chr10	59081099	59082427	LTR12C:LTR:ERV1:+	0.0591711	0.0263827	0.232789
																		chr10	60207024	60208566	LTR12C:LTR:ERV1:-	0.916307	0.880661	0.75824
																		chr10	62800248	62801619	LTR12C:LTR:ERV1:+	0.715373	0.621653	0.389527
																		chr10	63627220	63628884	LTR12C:LTR:ERV1:+	0.0968083	0.063053	0.0505357
																		chr10	64039952	64041562	LTR12C:LTR:ERV1:+	0.0251602	0.061462	0.13455
																		chr10	64793165	64794714	LTR12C:LTR:ERV1:+	0.434849	0.363738	0.114193
																		chr10	65955839	65957089	LTR12C:LTR:ERV1:-	0.044716	0.0481598	0.00510204
																		chr10	67188249	67189739	LTR12C:LTR:ERV1:-	0.0534903	0.00379591	0.490217
																		chr10	72621216	72622664	LTR12C:LTR:ERV1:+	0.162451	0.0549339	0.397681
																		chr10	74060186	74061778	LTR12C:LTR:ERV1:+	0.274342	0.150869	0.139901
																		chr10	74085530	74086936	LTR12C:LTR:ERV1:+	0.507949	0.313575	0.160136
																		chr10	75704210	75705721	LTR12C:LTR:ERV1:+	0.829301	0.804396	0.737864
																		chr10	79349323	79350511	LTR12C:LTR:ERV1:-	0.0214487	0.0130952	0.0763548
																		chr10	82075011	82076383	LTR12C:LTR:ERV1:+	0.386636	0.1458	0.610204
																		chr10	82118508	82119796	LTR12C:LTR:ERV1:-	0.148424	0.0953311	0.358154
																		chr10	82302837	82304215	LTR12C:LTR:ERV1:+	0.416955	0.218618	0.261693
																		chr10	82345450	82346885	LTR12C:LTR:ERV1:+	0.055307	0.0203557	0.418347
																		chr10	82573783	82575060	LTR12C:LTR:ERV1:+	0.460871	0.293408	0.551058
																		chr10	82618807	82620452	LTR12C:LTR:ERV1:+	0.627351	0.246953	0.27754
																		chr10	83023548	83025236	LTR12C:LTR:ERV1:-	0.712064	0.604408	0.297354
																		chr10	83068016	83069408	LTR12C:LTR:ERV1:-	0.392935	0.345027	0.139592
																		chr10	83262426	83263805	LTR12C:LTR:ERV1:+	0.364234	0.255143	0.55358
																		chr10	83265399	83266747	LTR12C:LTR:ERV1:+	0.888497	0.796024	0.416758
																		chr10	83543799	83545208	LTR12C:LTR:ERV1:+	0.482311	0.212052	0.755408
																		chr10	83621696	83622998	LTR12C:LTR:ERV1:-	0.909785	0.736539	0.768944
																		chr10	86330773	86332344	LTR12C:LTR:ERV1:+	0.713802	0.613831	0.567134
																		chr10	86900972	86902399	LTR12C:LTR:ERV1:+	0.438194	0.195165	0.671106
																		chr10	90777510	90778898	LTR12C:LTR:ERV1:-	0.632492	0.581454	0.751066
																		chr10	91878818	91880085	LTR12C:LTR:ERV1:-	0.909365	0.85197	0.708259
																		chr10	92590923	92592497	LTR12C:LTR:ERV1:-	0.610428	0.548237	0.803786
																		chr10	95604759	95606182	LTR12C:LTR:ERV1:+	0.477049	0.269229	0.303943
																		chr10	96218288	96219810	LTR12C:LTR:ERV1:-	0.92031	0.928977	0.886841
																		chr10	103959532	103961182	LTR12C:LTR:ERV1:-	0.931116	0.936535	0.765357
																		chr10	106004744	106006116	LTR12C:LTR:ERV1:+	0.384754	0.15328	0.723382
																		chr10	108686883	108688416	LTR12C:LTR:ERV1:-	0.0551382	0.0309331	0.0600289
																		chr10	109710160	109711869	LTR12C:LTR:ERV1:+	0.895144	0.893589	0.769111
																		chr10	112091028	112092657	LTR12C:LTR:ERV1:+	0.909645	0.921125	0.695996
																		chr10	114129885	114131339	LTR12C:LTR:ERV1:+	0.761381	0.503302	0.58529
																		chr10	118152733	118154254	LTR12C:LTR:ERV1:+	0.133955	0.057503	0.397411
																		chr10	120518647	120520225	LTR12C:LTR:ERV1:-	0.395731	0.350863	0.518848
																		chr10	120542229	120543736	LTR12C:LTR:ERV1:+	0.361598	0.325551	0.089881
																		chr10	122793590	122795421	LTR12C:LTR:ERV1:-	0.697101	0.4576	0.289771
																		chr10	123124906	123126138	LTR12C:LTR:ERV1:+	0.33817	0.385245	0.177506
																		chr10	123141501	123142879	LTR12C:LTR:ERV1:+	0.502415	0.404616	0.461723
																		chr10	123736894	123738445	LTR12C:LTR:ERV1:-	0.901788	0.726753	0.834372
																		chr10	124771946	124773576	LTR12C:LTR:ERV1:-	0.663301	0.554943	0.47564
																		chr10	130868277	130870180	LTR12C:LTR:ERV1:-	0.298611	0.0671192	0.399114
																		chr10	134493981	134495093	LTR12C:LTR:ERV1:+	0.246932	0.130662	0.254195
																		chr11	129891384	129892746	LTR12C:LTR:ERV1:+	0.0449501	0.0130952	0.105729
																		chr11	3455363	3456731	LTR12C:LTR:ERV1:-	0.170999	0.242331	0.137272
																		chr11	3609772	3611170	LTR12C:LTR:ERV1:+	0.742312	0.868239	0.734387
																		chr11	5165460	5166849	LTR12C:LTR:ERV1:+	0.237631	0.214315	0.195476
																		chr11	5314489	5316184	LTR12C:LTR:ERV1:-	0.575799	0.736678	0.234757
																		chr11	5610924	5612246	LTR12C:LTR:ERV1:+	0.368193	0.402915	0.295414
																		chr11	9643598	9645149	LTR12C:LTR:ERV1:-	0.441394	0.459571	0.337285
																		chr11	10153867	10155417	LTR12C:LTR:ERV1:-	0.825953	0.768848	0.712544
																		chr11	14612431	14613816	LTR12C:LTR:ERV1:+	0.530393	0.593433	0.321672
																		chr11	15582286	15583680	LTR12C:LTR:ERV1:+	0.0277569	0.0436075	0.198854
																		chr11	18296788	18298204	LTR12C:LTR:ERV1:-	0.245041	0.168186	0.573515
																		chr11	21773986	21775228	LTR12C:LTR:ERV1:-	0.0102732	0.00849705	0.00555556
																		chr11	23673876	23675259	LTR12C:LTR:ERV1:-	0.228316	0.0601801	0.340278
																		chr11	23955474	23956835	LTR12C:LTR:ERV1:-	0.908057	0.877251	0.55471
																		chr11	23962896	23964385	LTR12C:LTR:ERV1:-	0.903556	0.671529	0.61121
																		chr11	24436681	24438131	LTR12C:LTR:ERV1:-	0.204852	0.150276	0.571305
																		chr11	24917660	24919283	LTR12C:LTR:ERV1:+	0.492687	0.497595	0.661888
																		chr11	28532964	28534444	LTR12C:LTR:ERV1:-	0.918178	0.889204	0.679067
																		chr11	28546352	28547895	LTR12C:LTR:ERV1:-	0.91496	0.86685	0.814362
																		chr11	28912105	28913521	LTR12C:LTR:ERV1:+	0.554797	0.341311	0.76999
																		chr11	29620973	29622259	LTR12C:LTR:ERV1:-	0.141721	0.136199	0.00909091
																		chr11	29734008	29735632	LTR12C:LTR:ERV1:+	0.819434	0.707567	0.593335
																		chr11	29955576	29956794	LTR12C:LTR:ERV1:+	0.782359	0.561084	0.678095
																		chr11	32909024	32910270	LTR12C:LTR:ERV1:-	0.170256	0.0699759	0.614729
																		chr11	33452423	33453854	LTR12C:LTR:ERV1:-	0.908015	0.891471	0.531931
																		chr11	34011463	34013122	LTR12C:LTR:ERV1:+	0.530637	0.311021	0.238473
																		chr11	38317066	38318243	LTR12C:LTR:ERV1:-	0.273191	0.16341	0.199134
																		chr11	39333194	39334905	LTR12C:LTR:ERV1:+	0.354586	0.336625	0.482043
																		chr11	39353848	39355183	LTR12C:LTR:ERV1:-	0.83737	0.646903	0.782188
																		chr11	39462791	39464177	LTR12C:LTR:ERV1:-	0.919678	0.776818	0.69645
																		chr11	41644242	41645677	LTR12C:LTR:ERV1:+	0.316473	0.373379	0.408048
																		chr11	41748631	41750199	LTR12C:LTR:ERV1:-	0.911898	0.934516	0.833333
																		chr11	41808791	41810342	LTR12C:LTR:ERV1:-	0.662982	0.466079	0.449384
																		chr11	42364831	42366440	LTR12C:LTR:ERV1:-	0.873156	0.78405	0.864994
																		chr11	42895285	42896945	LTR12C:LTR:ERV1:+	0.58774	0.461936	0.599241
																		chr11	42902750	42904470	LTR12C:LTR:ERV1:+	0.723033	0.722307	0.680061
																		chr11	42971243	42972706	LTR12C:LTR:ERV1:+	0.816236	0.585228	0.677056
																		chr11	48250287	48251994	LTR12C:LTR:ERV1:+	0.801972	0.60336	0.553226
																		chr11	50142259	50143837	LTR12C:LTR:ERV1:+	0.395259	0.13683	0.56653
																		chr11	56168565	56169960	LTR12C:LTR:ERV1:-	0.540131	0.132379	0.280889
																		chr11	56612476	56613965	LTR12C:LTR:ERV1:+	0.453798	0.16869	0.360218
																		chr11	58157278	58158609	LTR12C:LTR:ERV1:-	0.499996	0.419874	0.760498
																		chr11	58299251	58300713	LTR12C:LTR:ERV1:+	0.935825	0.946129	0.738634
																		chr11	59786860	59788254	LTR12C:LTR:ERV1:-	0.548074	0.085123	0.672776
																		chr11	63317493	63319060	LTR12C:LTR:ERV1:+	0.202963	0.0487415	0.520585
																		chr11	66207294	66208768	LTR12C:LTR:ERV1:-	0.352657	0.103783	0.654384
																		chr11	66756093	66757614	LTR12C:LTR:ERV1:+	0.567569	0.283289	0.189094
																		chr11	67243380	67244705	LTR12C:LTR:ERV1:+	0.249058	0.10291	0.0409983
																		chr11	67386323	67387896	LTR12C:LTR:ERV1:+	0.560599	0.499438	0.694725
																		chr11	67584398	67585645	LTR12C:LTR:ERV1:-	0.271457	0.568883	0.575467
																		chr11	67730555	67731955	LTR12C:LTR:ERV1:+	0.74892	0.905214	0.67528
																		chr11	71341763	71343161	LTR12C:LTR:ERV1:-	0.319748	0.319339	0.292517
																		chr11	71485605	71486974	LTR12C:LTR:ERV1:+	0.185932	0.193717	0.157407
																		chr11	74809068	74810547	LTR12C:LTR:ERV1:+	0.621396	0.58321	0.40432
																		chr11	75771434	75772867	LTR12C:LTR:ERV1:+	0.0358609	0.0384354	0.506111
																		chr11	76318969	76320638	LTR12C:LTR:ERV1:-	0.656551	0.697386	0.481865
																		chr11	78174997	78176513	LTR12C:LTR:ERV1:-	0.693492	0.672254	0.651241
																		chr11	78349718	78351409	LTR12C:LTR:ERV1:+	0.85929	0.58139	0.690902
																		chr11	79968422	79969862	LTR12C:LTR:ERV1:+	0.13414	0.0096764	0.180544
																		chr11	80242791	80244345	LTR12C:LTR:ERV1:-	0.876529	0.929489	0.565322
																		chr11	80918463	80919881	LTR12C:LTR:ERV1:+	0.218454	0.200673	0.0836957
																		chr11	81454776	81456124	LTR12C:LTR:ERV1:-	0.0500427	0.112795	0.73971
																		chr11	81696540	81698270	LTR12C:LTR:ERV1:-	0.879854	0.890856	0.63287
																		chr11	81700970	81702475	LTR12C:LTR:ERV1:-	0.766519	0.736602	0.656784
																		chr11	82114760	82116138	LTR12C:LTR:ERV1:+	0.436192	0.405438	0.202334
																		chr11	82212017	82213576	LTR12C:LTR:ERV1:+	0.254879	0.0846759	0.469597
																		chr11	82681533	82682974	LTR12C:LTR:ERV1:+	0.00302694	0.0061278	0.0868056
																		chr11	84018762	84020143	LTR12C:LTR:ERV1:-	0.0794516	0.00700866	0.0535917
																		chr11	86143620	86145128	LTR12C:LTR:ERV1:-	0.922503	0.922211	0.777066
																		chr11	87802044	87803649	LTR12C:LTR:ERV1:+	0.889564	0.8694	0.631595
																		chr11	89900184	89901538	LTR12C:LTR:ERV1:+	0.016355	0.00292659	0.195864
																		chr11	91001741	91003242	LTR12C:LTR:ERV1:+	0.156687	0.174855	0.0427984
																		chr11	96947416	96948983	LTR12C:LTR:ERV1:+	0.905853	0.956881	0.578095
																		chr11	97537908	97539296	LTR12C:LTR:ERV1:+	0.752303	0.50505	0.543595
																		chr11	97615456	97617180	LTR12C:LTR:ERV1:-	0.796641	0.81113	0.795055
																		chr11	98055198	98056502	LTR12C:LTR:ERV1:-	0.875981	0.811929	0.897727
																		chr11	98633112	98634704	LTR12C:LTR:ERV1:-	0.907231	0.953076	0.625841
																		chr11	101100834	101102622	LTR12C:LTR:ERV1:-	0.775207	0.762038	0.728508
																		chr11	101110936	101112536	LTR12C:LTR:ERV1:-	0.777465	0.800229	0.816497
																		chr11	104292033	104293723	LTR12C:LTR:ERV1:-	0.929668	0.90086	0.287546
																		chr11	110170867	110172194	LTR12C:LTR:ERV1:-	0.3853	0.42178	0.0168067
																		chr11	111092521	111093949	LTR12C:LTR:ERV1:+	0.111557	0.0967649	0.326406
																		chr11	113519045	113520592	LTR12C:LTR:ERV1:-	0.827852	0.691852	0.586275
																		chr11	115503687	115505161	LTR12C:LTR:ERV1:-	0.311612	0.287009	0.148602
																		chr11	116980334	116981722	LTR12C:LTR:ERV1:-	0.0406538	0.0218699	0.163755
																		chr11	117848381	117849769	LTR12C:LTR:ERV1:-	0.111244	0.0647552	0.118519
																		chr11	118558949	118560247	LTR12C:LTR:ERV1:-	0.331498	0.190072	0.0180451
																		chr11	119896424	119897863	LTR12C:LTR:ERV1:+	0	0	0.166716
																		chr11	120892187	120893512	LTR12C:LTR:ERV1:+	0.0937311	0.0160882	0.134909
																		chr11	124959208	124960750	LTR12C:LTR:ERV1:+	0.69094	0.752366	0.116058
																		chr11	125573655	125575162	LTR12C:LTR:ERV1:-	0.830553	0.734509	0.203333
																		chr11	127767435	127769016	LTR12C:LTR:ERV1:-	0.896906	0.862803	0.753392
																		chr11	128084062	128085724	LTR12C:LTR:ERV1:-	0.712393	0.767837	0.720421
																		chr11	128106802	128108242	LTR12C:LTR:ERV1:+	0.3581	0.197986	0.0615385
																		chr11	129840846	129842280	LTR12C:LTR:ERV1:-	0.0849399	0.0581617	0.110714
																		chr11	130206425	130207820	LTR12C:LTR:ERV1:-	0.884632	0.400794	0.785909
																		chr11	133652060	133653544	LTR12C:LTR:ERV1:+	0.752544	0.555022	0.721723
																		chr11	133871960	133873318	LTR12C:LTR:ERV1:-	0.0850205	0.0321297	0.0963785
																		chr12	123076387	123077767	LTR12C:LTR:ERV1:+	0.0364875	0.0276838	0.177249
																		chr12	296385	297788	LTR12C:LTR:ERV1:-	0.0641444	0	0.0500639
																		chr12	5997160	5998561	LTR12C:LTR:ERV1:-	0.548684	0.46587	0.53642
																		chr12	6241597	6243149	LTR12C:LTR:ERV1:+	0.372927	0.160845	0.0454696
																		chr12	6251179	6252562	LTR12C:LTR:ERV1:+	0.353846	0.173575	0.0753968
																		chr12	6268462	6269856	LTR12C:LTR:ERV1:+	0.290692	0.207869	0.058189
																		chr12	6299194	6300601	LTR12C:LTR:ERV1:-	0.890732	0.872058	0.0576871
																		chr12	6817288	6818649	LTR12C:LTR:ERV1:+	0.151256	0.0777881	0.0979392
																		chr12	6825018	6826463	LTR12C:LTR:ERV1:+	0.340627	0.316104	0.15836
																		chr12	7144546	7146083	LTR12C:LTR:ERV1:+	0.066157	0.0337438	0.176134
																		chr12	7792253	7793614	LTR12C:LTR:ERV1:+	0.0375098	0	0.0166667
																		chr12	8033693	8035070	LTR12C:LTR:ERV1:+	0.0859838	0.0841705	0.340697
																		chr12	8404040	8405344	LTR12C:LTR:ERV1:-	0.458669	0.637464	0.175507
																		chr12	8556690	8558080	LTR12C:LTR:ERV1:+	0.312251	0.151122	0.241981
																		chr12	8939678	8941264	LTR12C:LTR:ERV1:+	0.510849	0.265446	0.035119
																		chr12	9602004	9603545	LTR12C:LTR:ERV1:-	0.060085	0.0201814	0
																		chr12	9891349	9892738	LTR12C:LTR:ERV1:-	0.0312163	0.0408191	0.0321248
																		chr12	10027905	10029204	LTR12C:LTR:ERV1:-	0.104253	0.0808568	0.076
																		chr12	10377114	10378796	LTR12C:LTR:ERV1:-	0.364423	0.370992	0.0643939
																		chr12	11700043	11701326	LTR12C:LTR:ERV1:+	0.0691376	0.0163399	0.0309524
																		chr12	12624552	12625900	LTR12C:LTR:ERV1:-	0.90759	0.684528	0.352747
																		chr12	14472845	14474462	LTR12C:LTR:ERV1:+	0.607747	0.739917	0.144063
																		chr12	16027380	16028725	LTR12C:LTR:ERV1:+	0.934643	0.951862	0.649242
																		chr12	16210132	16211556	LTR12C:LTR:ERV1:+	0.0242263	0.0428144	0.0616246
																		chr12	17160375	17161704	LTR12C:LTR:ERV1:+	0.232498	0.105156	0.0181052
																		chr12	18193005	18194376	LTR12C:LTR:ERV1:+	0.930957	0.883963	0.741667
																		chr12	18652896	18654112	LTR12C:LTR:ERV1:+	0.0506628	0.0147207	0.136136
																		chr12	19382199	19383844	LTR12C:LTR:ERV1:-	0.890631	0.860066	0.571279
																		chr12	20267180	20268727	LTR12C:LTR:ERV1:-	0.947967	0.890408	0.708002
																		chr12	20935850	20937279	LTR12C:LTR:ERV1:-	0.686135	0.818106	0.722348
																		chr12	21814281	21815665	LTR12C:LTR:ERV1:+	0.231077	0.126256	0.0823683
																		chr12	22845226	22846537	LTR12C:LTR:ERV1:-	0.60893	0.336326	0.772842
																		chr12	23438696	23439888	LTR12C:LTR:ERV1:+	0.188572	0.105403	0.421023
																		chr12	25018829	25020241	LTR12C:LTR:ERV1:+	0.452959	0.459665	0.620768
																		chr12	25522126	25523453	LTR12C:LTR:ERV1:+	0.349619	0.427482	0.319219
																		chr12	25544178	25545516	LTR12C:LTR:ERV1:+	0.600654	0.633096	0.378253
																		chr12	29409395	29410823	LTR12C:LTR:ERV1:+	0.372073	0.35487	0.379079
																		chr12	29538294	29539738	LTR12C:LTR:ERV1:-	0.5796	0.554723	0.278581
																		chr12	30262400	30263946	LTR12C:LTR:ERV1:-	0.146626	0.186796	0.379527
																		chr12	30714383	30715931	LTR12C:LTR:ERV1:+	0.792358	0.666431	0.38576
																		chr12	31224079	31225596	LTR12C:LTR:ERV1:+	0.388708	0.284747	0.0214286
																		chr12	31957611	31959289	LTR12C:LTR:ERV1:-	0.561182	0.563119	0.22971
																		chr12	32625040	32626585	LTR12C:LTR:ERV1:+	0.19301	0.25115	0.378615
																		chr12	32678424	32679852	LTR12C:LTR:ERV1:+	0.22405	0.288556	0.186688
																		chr12	33185983	33187430	LTR12C:LTR:ERV1:-	0.803051	0.805838	0.746336
																		chr12	33228097	33229603	LTR12C:LTR:ERV1:+	0.83514	0.778202	0.548354
																		chr12	38835570	38837155	LTR12C:LTR:ERV1:+	0.616264	0.380834	0.576049
																		chr12	42666435	42668069	LTR12C:LTR:ERV1:-	0.91055	0.918476	0.797801
																		chr12	43003873	43005144	LTR12C:LTR:ERV1:-	0.714999	0.400525	0.309599
																		chr12	43617942	43619392	LTR12C:LTR:ERV1:+	0.508105	0.495562	0.359485
																		chr12	44257518	44258998	LTR12C:LTR:ERV1:+	0.658793	0.446868	0.72619
																		chr12	44893995	44895724	LTR12C:LTR:ERV1:+	0.940693	0.93303	0.53587
																		chr12	46411619	46413101	LTR12C:LTR:ERV1:+	0.263796	0.178465	0.135852
																		chr12	47726984	47728524	LTR12C:LTR:ERV1:+	0.622728	0.138579	0.389622
																		chr12	56393178	56394493	LTR12C:LTR:ERV1:-	0.451902	0.258265	0.0125
																		chr12	57188639	57190188	LTR12C:LTR:ERV1:-	0.537284	0.104652	0.293115
																		chr12	57779912	57781273	LTR12C:LTR:ERV1:+	0.393642	0.349625	0.0966652
																		chr12	62854177	62855578	LTR12C:LTR:ERV1:-	0.917939	0.941926	0.845162
																		chr12	64936536	64938260	LTR12C:LTR:ERV1:+	0.0343147	0.0037594	0.203709
																		chr12	66137956	66139509	LTR12C:LTR:ERV1:+	0.0418866	0.0896491	0.224562
																		chr12	68112133	68113576	LTR12C:LTR:ERV1:-	0.0392054	0.0336568	0.223377
																		chr12	71558957	71560554	LTR12C:LTR:ERV1:-	0.0389024	0.0175944	0.639479
																		chr12	72578636	72580384	LTR12C:LTR:ERV1:+	0.0856206	0.0462046	0.117645
																		chr12	74796541	74797682	LTR12C:LTR:ERV1:+	0.0561404	0.0196078	0.0569909
																		chr12	79946650	79948342	LTR12C:LTR:ERV1:-	0.899934	0.905013	0.541798
																		chr12	79955145	79956781	LTR12C:LTR:ERV1:+	0.9357	0.939801	0.787219
																		chr12	79958564	79959923	LTR12C:LTR:ERV1:+	0.938049	0.930968	0.841775
																		chr12	79967514	79968841	LTR12C:LTR:ERV1:+	0.947142	0.904836	0.834396
																		chr12	80104513	80106032	LTR12C:LTR:ERV1:+	0.0295221	0.0022758	0.0311454
																		chr12	80386298	80387571	LTR12C:LTR:ERV1:-	0.053733	0.0561489	0.246449
																		chr12	82754529	82755752	LTR12C:LTR:ERV1:-	0.737995	0.643818	0.731234
																		chr12	83122366	83123937	LTR12C:LTR:ERV1:+	0.689097	0.662529	0.78118
																		chr12	83194935	83196291	LTR12C:LTR:ERV1:-	0.937269	0.872968	0.846805
																		chr12	83533724	83535031	LTR12C:LTR:ERV1:+	0.0981012	0.131724	0.603618
																		chr12	84548182	84549464	LTR12C:LTR:ERV1:-	0.212248	0.122835	0.287707
																		chr12	86689080	86690735	LTR12C:LTR:ERV1:-	0.175142	0.0872527	0.347884
																		chr12	92027537	92029330	LTR12C:LTR:ERV1:+	0.0233808	0.0424523	0.0303658
																		chr12	92316813	92318231	LTR12C:LTR:ERV1:-	0.0672639	0.00188874	0.533257
																		chr12	92799450	92800859	LTR12C:LTR:ERV1:-	0.0681653	0.0619495	0.10832
																		chr12	95773201	95774697	LTR12C:LTR:ERV1:+	0.190829	0.304549	0.211614
																		chr12	96502499	96504106	LTR12C:LTR:ERV1:+	0.037013	0.0386235	0.199559
																		chr12	97905719	97907080	LTR12C:LTR:ERV1:-	0.318048	0.219568	0.153869
																		chr12	100823896	100825322	LTR12C:LTR:ERV1:+	0.0616293	0.00892492	0.0294444
																		chr12	100952976	100954478	LTR12C:LTR:ERV1:+	0.0710862	0.12962	0.18515
																		chr12	105298305	105299856	LTR12C:LTR:ERV1:-	0.0612985	0.0550019	0.484081
																		chr12	106626627	106627897	LTR12C:LTR:ERV1:+	0.130424	0.0419669	0.668056
																		chr12	112273275	112274615	LTR12C:LTR:ERV1:+	0.908084	0.885433	0.55724
																		chr12	112956864	112958259	LTR12C:LTR:ERV1:-	0.102322	0.12717	0.445179
																		chr12	117098347	117099725	LTR12C:LTR:ERV1:+	0.0558004	0.021554	0.0715454
																		chr12	119034021	119035545	LTR12C:LTR:ERV1:-	0.13895	0.152936	0.0502806
																		chr12	119834644	119836394	LTR12C:LTR:ERV1:-	0.821773	0.635812	0.751135
																		chr12	121387244	121388711	LTR12C:LTR:ERV1:-	0.710926	0.625991	0.593141
																		chr12	121530591	121531867	LTR12C:LTR:ERV1:-	0.242116	0.0727994	0.451704
																		chr12	121812085	121813616	LTR12C:LTR:ERV1:+	0.516703	0.189249	0.714978
																		chr12	123160311	123161709	LTR12C:LTR:ERV1:-	0.283542	0.157293	0.0769484
																		chr12	123732965	123734374	LTR12C:LTR:ERV1:-	0.929892	0.86593	0.580871
																		chr12	123897794	123899225	LTR12C:LTR:ERV1:-	0.0709131	0.0308134	0.444821
																		chr12	124431309	124432652	LTR12C:LTR:ERV1:+	0.921659	0.874747	0.279654
																		chr12	127051432	127053028	LTR12C:LTR:ERV1:+	0.892034	0.755943	0.54924
																		chr12	128467743	128469055	LTR12C:LTR:ERV1:+	0.0404035	0.0136054	0.132072
																		chr12	128731616	128733005	LTR12C:LTR:ERV1:+	0.110593	0.0694583	0.750119
																		chr12	130506414	130507963	LTR12C:LTR:ERV1:+	0.175589	0.0964235	0.22059
																		chr12	130740260	130741765	LTR12C:LTR:ERV1:-	0.280675	0.210112	0.115079
																		chr12	131712173	131713857	LTR12C:LTR:ERV1:+	0.890106	0.887425	0.241103
																		chr13	21313051	21314623	LTR12C:LTR:ERV1:-	0.880911	0.8125	0.82189
																		chr13	22493871	22495353	LTR12C:LTR:ERV1:-	0.0616397	0.00503472	0.457576
																		chr13	23473665	23475108	LTR12C:LTR:ERV1:-	0.836384	0.515479	0.672112
																		chr13	23701531	23703236	LTR12C:LTR:ERV1:+	0.510915	0.487306	0.404288
																		chr13	23716113	23717386	LTR12C:LTR:ERV1:+	0.52455	0.417387	0.589725
																		chr13	24105518	24106996	LTR12C:LTR:ERV1:+	0.937649	0.899602	0.632859
																		chr13	24251131	24252498	LTR12C:LTR:ERV1:-	0.576284	0.365838	0.80144
																		chr13	25080177	25081473	LTR12C:LTR:ERV1:-	0.0430586	0.00217087	0.724113
																		chr13	25133860	25135408	LTR12C:LTR:ERV1:-	0.285835	0.338475	0.37803
																		chr13	25197367	25198724	LTR12C:LTR:ERV1:+	0.877914	0.843594	0.558285
																		chr13	28321305	28323016	LTR12C:LTR:ERV1:-	0.450959	0.29063	0.280142
																		chr13	31756325	31757711	LTR12C:LTR:ERV1:-	0.457906	0.464008	0.205754
																		chr13	31912683	31914368	LTR12C:LTR:ERV1:-	0.861137	0.823585	0.745944
																		chr13	32181867	32183528	LTR12C:LTR:ERV1:-	0.845577	0.547778	0.18545
																		chr13	33931933	33933665	LTR12C:LTR:ERV1:+	0.589426	0.443671	0.296644
																		chr13	34256061	34257380	LTR12C:LTR:ERV1:+	0.0107263	0.00991919	0.645115
																		chr13	39045582	39047132	LTR12C:LTR:ERV1:-	0.130553	0.0863001	0.461905
																		chr13	42471697	42473280	LTR12C:LTR:ERV1:-	0.0881712	0.0582653	0.115
																		chr13	43133728	43134989	LTR12C:LTR:ERV1:+	0.315902	0.196781	0.424049
																		chr13	44987527	44988900	LTR12C:LTR:ERV1:+	0.0631508	0.0925634	0.196108
																		chr13	47509247	47510754	LTR12C:LTR:ERV1:-	0.90578	0.874444	0.834206
																		chr13	50970547	50971969	LTR12C:LTR:ERV1:+	0.193713	0.143857	0.42811
																		chr13	51326578	51328003	LTR12C:LTR:ERV1:-	0.779789	0.424158	0.588804
																		chr13	52981339	52982780	LTR12C:LTR:ERV1:-	0.0818944	0.0578754	0.747305
																		chr13	53388368	53389916	LTR12C:LTR:ERV1:-	0.195938	0.0689894	0.600911
																		chr13	53400233	53401476	LTR12C:LTR:ERV1:+	0.0170097	0.0227354	0.537071
																		chr13	54013624	54014931	LTR12C:LTR:ERV1:+	0.788749	0.739863	0.740368
																		chr13	54025688	54027093	LTR12C:LTR:ERV1:-	0.476841	0.253081	0.491005
																		chr13	55250555	55252098	LTR12C:LTR:ERV1:+	0.865835	0.877888	0.786691
																		chr13	55310620	55311976	LTR12C:LTR:ERV1:-	0.769787	0.58212	0.163265
																		chr13	55373264	55374370	LTR12C:LTR:ERV1:-	0.251407	0.0709234	0.17346
																		chr13	55402530	55404200	LTR12C:LTR:ERV1:-	0.864431	0.646302	0.313831
																		chr13	57232077	57233800	LTR12C:LTR:ERV1:-	0.899361	0.65371	0.813578
																		chr13	57309560	57310780	LTR12C:LTR:ERV1:+	0.0932948	0.0486978	0
																		chr13	57474653	57476206	LTR12C:LTR:ERV1:+	0.154953	0.083127	0.511204
																		chr13	57859593	57861295	LTR12C:LTR:ERV1:-	0.299566	0.23737	0.0375079
																		chr13	58891944	58893233	LTR12C:LTR:ERV1:-	0.167947	0.0793297	0.0323232
																		chr13	59077543	59078925	LTR12C:LTR:ERV1:-	0.920994	0.920546	0.731061
																		chr13	59288034	59289474	LTR12C:LTR:ERV1:+	0.478463	0.435723	0.241026
																		chr13	59432285	59433546	LTR12C:LTR:ERV1:-	0.127157	0.199875	0.0333333
																		chr13	59531415	59532879	LTR12C:LTR:ERV1:-	0.571057	0.461387	0.306819
																		chr13	60013861	60015703	LTR12C:LTR:ERV1:+	0.830443	0.782262	0.562286
																		chr13	62619557	62621209	LTR12C:LTR:ERV1:-	0.799461	0.596453	0.596537
																		chr13	62953176	62954584	LTR12C:LTR:ERV1:+	0.099557	0.0144172	0.149928
																		chr13	63879692	63881249	LTR12C:LTR:ERV1:+	0.312061	0.141032	0.0343159
																		chr13	64650911	64652192	LTR12C:LTR:ERV1:-	0.0159407	0.00260695	0.143984
																		chr13	67135014	67136300	LTR12C:LTR:ERV1:+	0.186317	0.163806	0.332475
																		chr13	67195897	67197330	LTR12C:LTR:ERV1:+	0.186357	0.124601	0.171078
																		chr13	68346102	68347605	LTR12C:LTR:ERV1:-	0.292863	0.350615	0.591353
																		chr13	69097900	69099243	LTR12C:LTR:ERV1:+	0.732075	0.454311	0.588771
																		chr13	71085139	71086603	LTR12C:LTR:ERV1:-	0.0699054	0.0248867	0.27684
																		chr13	75292348	75293806	LTR12C:LTR:ERV1:+	0.296595	0.0766305	0.690966
																		chr13	75842400	75843907	LTR12C:LTR:ERV1:+	0.0223187	0.0402185	0.107782
																		chr13	76092514	76093896	LTR12C:LTR:ERV1:+	0.334315	0.314046	0.617971
																		chr13	76764083	76765494	LTR12C:LTR:ERV1:+	0.096978	0.0949505	0.0626347
																		chr13	78048611	78050155	LTR12C:LTR:ERV1:-	0.190858	0.042599	0.054494
																		chr13	79692946	79694320	LTR12C:LTR:ERV1:-	0.0213082	0.00437091	0.410415
																		chr13	80173456	80174860	LTR12C:LTR:ERV1:-	0.0645305	0.0697348	0.021978
																		chr13	80851886	80853320	LTR12C:LTR:ERV1:-	0.116672	0.0421606	0.526831
																		chr13	80929497	80930905	LTR12C:LTR:ERV1:+	0.0909937	0.0736353	0.0994814
																		chr13	81063877	81065262	LTR12C:LTR:ERV1:-	0.188763	0.11702	0.161161
																		chr13	81913926	81915470	LTR12C:LTR:ERV1:-	0.0970884	0.0335085	0.0210956
																		chr13	82738359	82739651	LTR12C:LTR:ERV1:-	0.573931	0.366616	0.709778
																		chr13	82831930	82833714	LTR12C:LTR:ERV1:+	0.347777	0.337813	0.105999
																		chr13	85778866	85780269	LTR12C:LTR:ERV1:+	0.225223	0.149885	0.319762
																		chr13	87444336	87445591	LTR12C:LTR:ERV1:+	0.117008	0.0192326	0.124365
																		chr13	88943891	88945338	LTR12C:LTR:ERV1:+	0.132421	0.0758597	0.398927
																		chr13	91000670	91002031	LTR12C:LTR:ERV1:+	0.018584	0.0646791	0.181617
																		chr13	91146890	91148492	LTR12C:LTR:ERV1:+	0.135097	0.0927804	0.0722496
																		chr13	92942958	92944305	LTR12C:LTR:ERV1:+	0.477896	0.210011	0.517252
																		chr13	92948734	92950300	LTR12C:LTR:ERV1:+	0.931577	0.772865	0.417645
																		chr13	94105737	94107603	LTR12C:LTR:ERV1:-	0.308686	0.231752	0.190414
																		chr13	96582944	96584246	LTR12C:LTR:ERV1:-	0.672112	0.561777	0.81067
																		chr13	98197347	98199001	LTR12C:LTR:ERV1:+	0.872014	0.893574	0.661811
																		chr13	98727711	98729092	LTR12C:LTR:ERV1:-	0.560167	0.413189	0.770084
																		chr13	100729583	100731015	LTR12C:LTR:ERV1:+	0.921765	0.920742	0.657269
																		chr13	100875479	100876855	LTR12C:LTR:ERV1:-	0.739533	0.670026	0.269004
																		chr13	101627865	101629394	LTR12C:LTR:ERV1:+	0.0570594	0.0600242	0.129885
																		chr13	102720640	102722186	LTR12C:LTR:ERV1:+	0.363634	0.34786	0.284034
																		chr13	104252147	104253633	LTR12C:LTR:ERV1:+	0.270599	0.219287	0.232631
																		chr13	110384119	110385565	LTR12C:LTR:ERV1:-	0.0490776	0.0374084	0.159503
																		chr13	111284353	111285941	LTR12C:LTR:ERV1:-	0.837846	0.806527	0.189835
																		chr13	111473322	111474869	LTR12C:LTR:ERV1:+	0.0538436	0.0626346	0.0978571
																		chr13	111735384	111736784	LTR12C:LTR:ERV1:-	0.0530304	0.141597	0.157005
																		chr13	112875848	112877237	LTR12C:LTR:ERV1:+	0.127313	0.0810669	0.142851
																		chr13	112892833	112894395	LTR12C:LTR:ERV1:+	0.552338	0.380824	0.562976
																		chr14	24049652	24051196	LTR12C:LTR:ERV1:+	0.907002	0.893364	0.414517
																		chr14	24053108	24054656	LTR12C:LTR:ERV1:-	0.707398	0.641469	0.39945
																		chr14	24360782	24362331	LTR12C:LTR:ERV1:+	0.547348	0.36392	0.269178
																		chr14	28314391	28315786	LTR12C:LTR:ERV1:+	0.0681156	0.0219406	0.0190392
																		chr14	30378028	30379688	LTR12C:LTR:ERV1:+	0.962658	0.950945	0.582612
																		chr14	31015438	31017279	LTR12C:LTR:ERV1:-	0.324903	0.288952	0.458303
																		chr14	31995318	31996845	LTR12C:LTR:ERV1:-	0.320505	0.330049	0.239859
																		chr14	32169576	32171051	LTR12C:LTR:ERV1:+	0.940068	0.930502	0.890166
																		chr14	33667030	33668502	LTR12C:LTR:ERV1:-	0.471323	0.304769	0.585018
																		chr14	34814242	34815549	LTR12C:LTR:ERV1:-	0.883636	0.630077	0.689758
																		chr14	41622646	41623998	LTR12C:LTR:ERV1:-	0.749976	0.13969	0.0900398
																		chr14	42581843	42583232	LTR12C:LTR:ERV1:-	0.305618	0.106761	0.16337
																		chr14	42950774	42952154	LTR12C:LTR:ERV1:-	0.248984	0.132082	0.162686
																		chr14	43795633	43797141	LTR12C:LTR:ERV1:+	0.852907	0.818494	0.748094
																		chr14	44002028	44003534	LTR12C:LTR:ERV1:+	0.411396	0.218866	0.073277
																		chr14	44853762	44855160	LTR12C:LTR:ERV1:+	0.125711	0.0543762	0.0962265
																		chr14	45267607	45269276	LTR12C:LTR:ERV1:+	0.575301	0.668571	0.320096
																		chr14	45549456	45550877	LTR12C:LTR:ERV1:+	0.297253	0.196529	0.112153
																		chr14	47711464	47713010	LTR12C:LTR:ERV1:+	0.411263	0.49285	0.439314
																		chr14	48095576	48097235	LTR12C:LTR:ERV1:+	0.45972	0.257863	0.055539
																		chr14	48134568	48136318	LTR12C:LTR:ERV1:+	0.879101	0.679464	0.727868
																		chr14	50828488	50830001	LTR12C:LTR:ERV1:+	0.130979	0.179039	0.256116
																		chr14	52588776	52590207	LTR12C:LTR:ERV1:+	0.445034	0.275855	0.331102
																		chr14	53683100	53684767	LTR12C:LTR:ERV1:-	0.670579	0.428405	0.135714
																		chr14	54859995	54861356	LTR12C:LTR:ERV1:+	0.0160992	0.0388559	0.0709249
																		chr14	54909586	54911168	LTR12C:LTR:ERV1:+	0.258097	0.154701	0.152126
																		chr14	57457601	57458981	LTR12C:LTR:ERV1:+	0.19326	0.0728868	0.224723
																		chr14	57522352	57523898	LTR12C:LTR:ERV1:-	0.220303	0.0761258	0.132215
																		chr14	59153136	59154536	LTR12C:LTR:ERV1:-	0.947034	0.850933	0.756657
																		chr14	59300473	59301918	LTR12C:LTR:ERV1:+	0.0980478	0.0269273	0.449144
																		chr14	65124713	65126092	LTR12C:LTR:ERV1:+	0.0402181	0.0461226	0.0285714
																		chr14	67522415	67523949	LTR12C:LTR:ERV1:-	0.801886	0.665859	0.501031
																		chr14	70721260	70722899	LTR12C:LTR:ERV1:+	0.325646	0.177434	0.00595238
																		chr14	71634073	71635408	LTR12C:LTR:ERV1:+	0.0184619	0.0349337	0
																		chr14	71720828	71722264	LTR12C:LTR:ERV1:+	0.0882564	0.0924523	0.0161616
																		chr14	74032171	74033585	LTR12C:LTR:ERV1:-	0.802457	0.55664	0.648956
																		chr14	74056422	74057693	LTR12C:LTR:ERV1:-	0.0347771	0.0709253	0.0119048
																		chr14	77002330	77003658	LTR12C:LTR:ERV1:-	0.0323501	0.0401173	0.189562
																		chr14	77172247	77173553	LTR12C:LTR:ERV1:-	0.0672119	0.0121095	0.213081
																		chr14	78479378	78480889	LTR12C:LTR:ERV1:-	0.126217	0.0594997	0.202298
																		chr14	82089005	82090676	LTR12C:LTR:ERV1:-	0.17716	0.0841243	0.19047
																		chr14	82134022	82135612	LTR12C:LTR:ERV1:-	0.943694	0.911722	0.755205
																		chr14	82144681	82146082	LTR12C:LTR:ERV1:-	0.699052	0.616721	0.183245
																		chr14	82294798	82296348	LTR12C:LTR:ERV1:-	0.78682	0.775613	0.635085
																		chr14	83558544	83560129	LTR12C:LTR:ERV1:+	0.00590786	0.00833333	0
																		chr14	84864690	84866311	LTR12C:LTR:ERV1:-	0.16507	0.127885	0.135354
																		chr14	84978009	84979817	LTR12C:LTR:ERV1:-	0.0559193	0.021631	0.307106
																		chr14	87370926	87372336	LTR12C:LTR:ERV1:-	0.054922	0.0309409	0.137247
																		chr14	88200236	88201661	LTR12C:LTR:ERV1:-	0.0536815	0.0283415	0.616837
																		chr14	89577807	89579188	LTR12C:LTR:ERV1:+	0.0785483	0.0105263	0.184957
																		chr14	92044122	92045736	LTR12C:LTR:ERV1:+	0.868144	0.777282	0.654961
																		chr14	93635652	93636993	LTR12C:LTR:ERV1:-	0.0172976	0.0733017	0.478388
																		chr14	100673663	100675034	LTR12C:LTR:ERV1:-	0.0576923	0.0185492	0.2908
																		chr14	102155244	102156790	LTR12C:LTR:ERV1:+	0.248912	0.150605	0.456852
																		chr14	102600761	102602412	LTR12C:LTR:ERV1:-	0.267505	0.173769	0
																		chr14	102763814	102765460	LTR12C:LTR:ERV1:+	0.845976	0.646227	0.788983
																		chr14	105216784	105218363	LTR12C:LTR:ERV1:-	0.095166	0.103888	0.517088
																		chr14	106013992	106015849	LTR12C:LTR:ERV1:+	0.0507005	0.0424968	0.502153
																		chr15	24047876	24049306	LTR12C:LTR:ERV1:+	0.0461236	0.0790071	0.260755
																		chr15	24322736	24324134	LTR12C:LTR:ERV1:-	0.524164	0.401146	0.71039
																		chr15	25497416	25498905	LTR12C:LTR:ERV1:-	0.805216	0.651831	0.616727
																		chr15	26301876	26303400	LTR12C:LTR:ERV1:+	0.40224	0.193637	0.547326
																		chr15	26542061	26543767	LTR12C:LTR:ERV1:-	0.26738	0.200464	0.598557
																		chr15	27026018	27027338	LTR12C:LTR:ERV1:-	0.743363	0.65743	0.782143
																		chr15	27075301	27076891	LTR12C:LTR:ERV1:-	0.356199	0.242228	0.0272844
																		chr15	27900817	27902109	LTR12C:LTR:ERV1:-	0.197342	0.0565563	0.566678
																		chr15	29451255	29452641	LTR12C:LTR:ERV1:-	0.263041	0.265655	0.749927
																		chr15	29516191	29517515	LTR12C:LTR:ERV1:-	0.20238	0.345098	0.830122
																		chr15	29782295	29783636	LTR12C:LTR:ERV1:-	0.615017	0.471774	0.734324
																		chr15	31175776	31177316	LTR12C:LTR:ERV1:+	0.795818	0.48227	0.171432
																		chr15	33310840	33312230	LTR12C:LTR:ERV1:-	0.268422	0.151416	0.237365
																		chr15	36338971	36340191	LTR12C:LTR:ERV1:+	0.0638518	0.0712898	0.282187
																		chr15	40366151	40367535	LTR12C:LTR:ERV1:-	0.0230292	0.0515549	0.0723983
																		chr15	40968294	40969691	LTR12C:LTR:ERV1:-	0.456162	0.207466	0.0918631
																		chr15	41253630	41255097	LTR12C:LTR:ERV1:+	0.065302	0.0196222	0.11745
																		chr15	41443693	41445042	LTR12C:LTR:ERV1:+	0.0975531	0.0177246	0.0708333
																		chr15	43518017	43519311	LTR12C:LTR:ERV1:-	0.0579049	0.0134052	0.0357237
																		chr15	43765048	43766641	LTR12C:LTR:ERV1:-	0.767735	0.798737	0.141239
																		chr15	45606107	45607382	LTR12C:LTR:ERV1:+	0.08464	0.0442876	0.0895346
																		chr15	45942451	45943768	LTR12C:LTR:ERV1:-	0.78929	0.525318	0.851204
																		chr15	51103990	51105291	LTR12C:LTR:ERV1:+	0.16925	0.137382	0.72407
																		chr15	54754479	54755965	LTR12C:LTR:ERV1:+	0.34883	0.381995	0.646119
																		chr15	57071643	57073066	LTR12C:LTR:ERV1:+	0.491153	0.0904692	0.413711
																		chr15	62477967	62479326	LTR12C:LTR:ERV1:-	0.0687672	0.0165337	0.265789
																		chr15	63751089	63752457	LTR12C:LTR:ERV1:+	0.399668	0.34619	0.7514
																		chr15	64352866	64354320	LTR12C:LTR:ERV1:+	0.459292	0.241513	0.704249
																		chr15	65367179	65368926	LTR12C:LTR:ERV1:+	0.724854	0.688255	0.113974
																		chr15	65592548	65593976	LTR12C:LTR:ERV1:-	0.121765	0.016773	0.358198
																		chr15	69267107	69268572	LTR12C:LTR:ERV1:-	0.924111	0.963979	0.813467
																		chr15	69858961	69860260	LTR12C:LTR:ERV1:-	0.410377	0.236047	0.149431
																		chr15	70878530	70880069	LTR12C:LTR:ERV1:-	0.0314427	0.00924932	0.333031
																		chr15	74023703	74025037	LTR12C:LTR:ERV1:-	0.0443305	0.0390018	0.166461
																		chr15	74265918	74267333	LTR12C:LTR:ERV1:+	0.0507576	0.0112169	0
																		chr15	74344706	74346221	LTR12C:LTR:ERV1:+	0.0908038	0.0448622	0.107245
																		chr15	74771424	74773250	LTR12C:LTR:ERV1:-	0.413804	0.58339	0.131585
																		chr15	75407466	75408852	LTR12C:LTR:ERV1:-	0.11172	0.0752155	0.169185
																		chr15	78537613	78539044	LTR12C:LTR:ERV1:-	0.136437	0.0532041	0.123188
																		chr15	79139032	79140411	LTR12C:LTR:ERV1:+	0.023626	0.0454895	0.0383838
																		chr15	80218272	80219573	LTR12C:LTR:ERV1:+	0.101779	0.0275298	0.0638655
																		chr15	80308681	80310142	LTR12C:LTR:ERV1:+	0.333052	0.112183	0.147323
																		chr15	81450776	81452297	LTR12C:LTR:ERV1:+	0.0609775	0	0.0516563
																		chr15	89574129	89575449	LTR12C:LTR:ERV1:-	0.0823319	0.102936	0.320046
																		chr15	91368567	91370060	LTR12C:LTR:ERV1:+	0.0651092	0.0226406	0.679133
																		chr15	93253529	93254813	LTR12C:LTR:ERV1:-	0.0221055	0.0293687	0.0366467
																		chr15	93574874	93576152	LTR12C:LTR:ERV1:+	0.631782	0.613043	0.619736
																		chr15	97034196	97035632	LTR12C:LTR:ERV1:-	0.0841567	0.0306287	0.245022
																		chr15	98646530	98648018	LTR12C:LTR:ERV1:-	0.209889	0.132451	0.0650794
																		chr15	99092799	99094232	LTR12C:LTR:ERV1:+	0.0342736	0.015894	0.600551
																		chr15	99543094	99544479	LTR12C:LTR:ERV1:+	0.341022	0.453465	0.492503
																		chr15	99550602	99552026	LTR12C:LTR:ERV1:-	0.0596469	0.00789718	0.0470588
																		chr15	100033885	100035375	LTR12C:LTR:ERV1:-	0.483221	0.297446	0.740045
																		chr16	391082	392390	LTR12C:LTR:ERV1:+	0.49676	0.46607	0.0342532
																		chr16	2007337	2008738	LTR12C:LTR:ERV1:-	0.0478891	0.0625514	0
																		chr16	5157704	5159069	LTR12C:LTR:ERV1:-	0.733003	0.457718	0.159883
																		chr16	5235500	5236888	LTR12C:LTR:ERV1:-	0.361798	0.116945	0.251331
																		chr16	9277224	9278584	LTR12C:LTR:ERV1:-	0.0817797	0.0526199	0.105061
																		chr16	16197676	16199048	LTR12C:LTR:ERV1:-	0.55103	0.379953	0.578624
																		chr16	21000021	21001529	LTR12C:LTR:ERV1:-	0.100747	0.0890278	0.113029
																		chr16	21163734	21165151	LTR12C:LTR:ERV1:+	0.299024	0.11386	0.121577
																		chr16	21323167	21324666	LTR12C:LTR:ERV1:-	0.781766	0.769387	0.116288
																		chr16	22733456	22734836	LTR12C:LTR:ERV1:-	0.410732	0.481857	0.421213
																		chr16	26846626	26847940	LTR12C:LTR:ERV1:-	0.217233	0.136438	0.606632
																		chr16	29759505	29760641	LTR12C:LTR:ERV1:+	0.384577	0.038965	0.377703
																		chr16	48542430	48543751	LTR12C:LTR:ERV1:+	0.862016	0.581938	0.57532
																		chr16	52765147	52766503	LTR12C:LTR:ERV1:+	0.857039	0.809423	0.726451
																		chr16	54863555	54864987	LTR12C:LTR:ERV1:+	0.765062	0.760316	0.81604
																		chr16	58782579	58783947	LTR12C:LTR:ERV1:+	0.140383	0.0253225	0.394429
																		chr16	58823975	58825254	LTR12C:LTR:ERV1:-	0.919517	0.914214	0.426506
																		chr16	61161681	61163241	LTR12C:LTR:ERV1:-	0.288565	0.168825	0.269697
																		chr16	62758601	62759978	LTR12C:LTR:ERV1:+	0.202132	0.17197	0.0901961
																		chr16	63163364	63164793	LTR12C:LTR:ERV1:+	0.178235	0.0978545	0.11028
																		chr16	64105341	64106796	LTR12C:LTR:ERV1:-	0.146252	0.0681556	0.14787
																		chr16	64377615	64379108	LTR12C:LTR:ERV1:+	0.140285	0.150706	0.187743
																		chr16	67007999	67009289	LTR12C:LTR:ERV1:+	0.335507	0.0683676	0.314772
																		chr16	68015996	68017350	LTR12C:LTR:ERV1:+	0.0440736	0.00474255	0.604317
																		chr16	68031935	68033362	LTR12C:LTR:ERV1:+	0.176776	0.149674	0.140551
																		chr16	68560467	68562139	LTR12C:LTR:ERV1:+	0.392182	0.147038	0.289812
																		chr16	70483834	70485264	LTR12C:LTR:ERV1:-	0.485843	0.283825	0.0206412
																		chr16	77817416	77818839	LTR12C:LTR:ERV1:-	0.0985986	0.0240154	0.308093
																		chr16	84237279	84238752	LTR12C:LTR:ERV1:-	0.523659	0.473797	0.199652
																		chr16	86586867	86588012	LTR12C:LTR:ERV1:+	0.264939	0.191261	0.690747
																		chr17	2434408	2435943	LTR12C:LTR:ERV1:-	0.318649	0.247099	0.582156
																		chr17	4558936	4560349	LTR12C:LTR:ERV1:-	0.0372594	0.0130125	0.0549272
																		chr17	4611499	4612892	LTR12C:LTR:ERV1:-	0.0711952	0.0169814	0.0449134
																		chr17	5674381	5676053	LTR12C:LTR:ERV1:+	0.0640216	0.0256934	0.0377489
																		chr17	7003251	7004412	LTR12C:LTR:ERV1:-	0.138197	0.0309974	0.0990196
																		chr17	7544031	7545595	LTR12C:LTR:ERV1:+	0.459753	0.277856	0.359282
																		chr17	8620363	8621950	LTR12C:LTR:ERV1:-	0.150054	0.0924434	0.411012
																		chr17	12124037	12125537	LTR12C:LTR:ERV1:+	0.068169	0.00680272	0.133019
																		chr17	15408829	15410170	LTR12C:LTR:ERV1:+	0.886651	0.855939	0.250768
																		chr17	17389483	17391030	LTR12C:LTR:ERV1:+	0.239273	0.103251	0.250528
																		chr17	17859006	17860340	LTR12C:LTR:ERV1:-	0.0477343	0.00229885	0.528846
																		chr17	19556654	19558185	LTR12C:LTR:ERV1:-	0.93137	0.943942	0.700796
																		chr17	19919603	19920871	LTR12C:LTR:ERV1:+	0.0821694	0.00802172	0.284432
																		chr17	33605198	33606497	LTR12C:LTR:ERV1:-	0.436344	0.125327	0.624999
																		chr17	38531903	38533524	LTR12C:LTR:ERV1:+	0.653809	0.220902	0.497492
																		chr17	42446007	42447577	LTR12C:LTR:ERV1:+	0.403672	0.257627	0.0775438
																		chr17	42605149	42606586	LTR12C:LTR:ERV1:+	0.921991	0.835622	0.231612
																		chr17	42645411	42646847	LTR12C:LTR:ERV1:+	0.184592	0.0164568	0.291426
																		chr17	45133789	45135214	LTR12C:LTR:ERV1:-	0.763248	0.773263	0.0334795
																		chr17	50960509	50961884	LTR12C:LTR:ERV1:-	0.436319	0.39178	0.00588235
																		chr17	57249711	57251099	LTR12C:LTR:ERV1:+	0.805258	0.174126	0.740565
																		chr17	58690801	58692341	LTR12C:LTR:ERV1:+	0.570492	0.39738	0.631093
																		chr17	65290693	65292254	LTR12C:LTR:ERV1:+	0.100997	0.0257417	0.0890475
																		chr17	66047808	66049195	LTR12C:LTR:ERV1:+	0.246757	0.0535293	0.0696771
																		chr17	66076586	66078280	LTR12C:LTR:ERV1:+	0.183786	0.127803	0.0733811
																		chr17	66095240	66096756	LTR12C:LTR:ERV1:+	0.089891	0.0576323	0.213596
																		chr17	66164619	66166062	LTR12C:LTR:ERV1:-	0.0995826	0.0744528	0.207683
																		chr17	66175814	66177263	LTR12C:LTR:ERV1:+	0.195201	0.0211378	0.0306667
																		chr17	66203815	66205169	LTR12C:LTR:ERV1:+	0.121702	0.0312868	0.227435
																		chr17	66304357	66305612	LTR12C:LTR:ERV1:-	0.918315	0.868609	0.152624
																		chr17	72108748	72110012	LTR12C:LTR:ERV1:-	0.0459529	0.00365867	0.266837
																		chr17	72902016	72903699	LTR12C:LTR:ERV1:-	0.952764	0.915338	0.641214
																		chr17	74252721	74254294	LTR12C:LTR:ERV1:-	0.334024	0.126841	0.0667234
																		chr17	74610023	74611548	LTR12C:LTR:ERV1:-	0.875024	0.770219	0.70856
																		chr17	74802029	74803571	LTR12C:LTR:ERV1:+	0.327918	0.397725	0.191187
																		chr17	75521290	75522703	LTR12C:LTR:ERV1:-	0.0910587	0.0547619	0.60455
																		chr17	79324969	79326402	LTR12C:LTR:ERV1:-	0.435475	0.61075	0.130412
																		chr18	1098034	1099322	LTR12C:LTR:ERV1:+	0.0557472	0.0364528	0.44792
																		chr18	7177683	7179228	LTR12C:LTR:ERV1:-	0.772515	0.311217	0.025
																		chr18	7360494	7362487	LTR12C:LTR:ERV1:+	0.454455	0.487618	0.273308
																		chr18	8934579	8935985	LTR12C:LTR:ERV1:-	0.0817156	0.0330827	0.285014
																		chr18	9296673	9298314	LTR12C:LTR:ERV1:+	0.892495	0.710928	0.705498
																		chr18	11022771	11024195	LTR12C:LTR:ERV1:-	0.296592	0.162211	0.256845
																		chr18	11716180	11717468	LTR12C:LTR:ERV1:-	0.919171	0.878005	0.840902
																		chr18	12556427	12557700	LTR12C:LTR:ERV1:-	0.934474	0.85133	0.767169
																		chr18	12558071	12559643	LTR12C:LTR:ERV1:-	0.923107	0.775425	0.637221
																		chr18	12775720	12777415	LTR12C:LTR:ERV1:-	0.233527	0.114238	0.188095
																		chr18	13133962	13135222	LTR12C:LTR:ERV1:-	0.302832	0.105104	0.754841
																		chr18	18711535	18712979	LTR12C:LTR:ERV1:-	0.849875	0.594803	0.83802
																		chr18	19286301	19287708	LTR12C:LTR:ERV1:+	0.0849724	0.0359896	0.495429
																		chr18	21156496	21158159	LTR12C:LTR:ERV1:-	0.832759	0.778214	0.121158
																		chr18	21728496	21730078	LTR12C:LTR:ERV1:-	0.528353	0.432212	0.184352
																		chr18	21955809	21957113	LTR12C:LTR:ERV1:-	0.157912	0.0726754	0.0601396
																		chr18	25252922	25254381	LTR12C:LTR:ERV1:-	0.0269481	0.0168441	0.407296
																		chr18	27303299	27304688	LTR12C:LTR:ERV1:+	0.850784	0.593761	0.63242
																		chr18	27754189	27755629	LTR12C:LTR:ERV1:-	0.0832085	0.0374496	0.0665079
																		chr18	28368227	28369675	LTR12C:LTR:ERV1:+	0.44108	0.387968	0.51942
																		chr18	28418301	28419689	LTR12C:LTR:ERV1:-	0.173102	0.0513598	0.554932
																		chr18	29719645	29720915	LTR12C:LTR:ERV1:+	0.357254	0.311195	0.16648
																		chr18	30896009	30897473	LTR12C:LTR:ERV1:+	0.468873	0.44232	0.142399
																		chr18	31813737	31815097	LTR12C:LTR:ERV1:+	0.559087	0.470838	0.265163
																		chr18	32850701	32852145	LTR12C:LTR:ERV1:-	0.441319	0.282823	0.698388
																		chr18	36297501	36298910	LTR12C:LTR:ERV1:-	0.390503	0.250391	0.21498
																		chr18	36523461	36524922	LTR12C:LTR:ERV1:-	0.895732	0.874389	0.770588
																		chr18	36815136	36816474	LTR12C:LTR:ERV1:+	0.748945	0.55011	0.557275
																		chr18	36888883	36890195	LTR12C:LTR:ERV1:+	0.433881	0.236699	0.692345
																		chr18	37198248	37199620	LTR12C:LTR:ERV1:+	0.422609	0.31111	0.514214
																		chr18	39445539	39447088	LTR12C:LTR:ERV1:+	0.0630508	0.0358781	0.0123626
																		chr18	40375030	40376440	LTR12C:LTR:ERV1:+	0.4511	0.266963	0.471014
																		chr18	40719302	40720778	LTR12C:LTR:ERV1:+	0.909679	0.732968	0.831459
																		chr18	42160515	42162003	LTR12C:LTR:ERV1:+	0.135724	0.128087	0.0776942
																		chr18	48637180	48638739	LTR12C:LTR:ERV1:-	0.922458	0.874766	0.728135
																		chr18	48646498	48647853	LTR12C:LTR:ERV1:-	0.918004	0.931765	0.836508
																		chr18	49892563	49893838	LTR12C:LTR:ERV1:-	0.158213	0.0701958	0.135897
																		chr18	53507112	53508490	LTR12C:LTR:ERV1:-	0.425675	0.330821	0.692715
																		chr18	54239332	54240770	LTR12C:LTR:ERV1:+	0.0370474	0.00848217	0.0760073
																		chr18	55309220	55311410	LTR12C:LTR:ERV1:-	0.936332	0.934951	0.669266
																		chr18	57380390	57381888	LTR12C:LTR:ERV1:-	0.564193	0.349229	0.0819697
																		chr18	57456864	57458248	LTR12C:LTR:ERV1:-	0.0497222	0.142495	0.0540293
																		chr18	61710045	61711600	LTR12C:LTR:ERV1:+	0.4738	0.216619	0.763095
																		chr18	62392010	62393430	LTR12C:LTR:ERV1:-	0.241126	0.132512	0.0750882
																		chr18	63272307	63273754	LTR12C:LTR:ERV1:+	0.343459	0.166357	0.0952381
																		chr18	63672142	63673755	LTR12C:LTR:ERV1:-	0.64918	0.54363	0.470105
																		chr18	66546078	66547796	LTR12C:LTR:ERV1:-	0.814409	0.799136	0.760093
																		chr18	68697570	68699139	LTR12C:LTR:ERV1:-	0.892802	0.881323	0.829102
																		chr18	74310984	74312651	LTR12C:LTR:ERV1:-	0.0828039	0.0614245	0.281147
																		chr18	74489020	74490682	LTR12C:LTR:ERV1:+	0.76453	0.375584	0.53432
																		chr19	8440461	8441909	LTR12C:LTR:ERV1:+	0.362843	0.315682	0.282077
																		chr19	9370005	9371244	LTR12C:LTR:ERV1:+	0.00658329	0.00434707	0.0670996
																		chr19	9393146	9394695	LTR12C:LTR:ERV1:-	0.24732	0.349156	0.00584795
																		chr19	9431892	9433519	LTR12C:LTR:ERV1:+	0.855128	0.661312	0.122414
																		chr19	9651409	9652565	LTR12C:LTR:ERV1:-	0.890714	0.905688	0.25285
																		chr19	9658323	9660027	LTR12C:LTR:ERV1:+	0.560828	0.721256	0.420871
																		chr19	12051084	12052674	LTR12C:LTR:ERV1:-	0.945943	0.934667	0.802405
																		chr19	13296542	13298076	LTR12C:LTR:ERV1:-	0.326033	0.17662	0.150794
																		chr19	14388263	14389766	LTR12C:LTR:ERV1:+	0.79219	0.37115	0.71553
																		chr19	15718436	15720018	LTR12C:LTR:ERV1:-	0.0651913	0.0723007	0.0656746
																		chr19	22680975	22682355	LTR12C:LTR:ERV1:-	0.125088	0.0465479	0.166492
																		chr19	23849761	23851893	LTR12C:LTR:ERV1:-	0.487664	0.491512	0.152381
																		chr19	24223933	24225498	LTR12C:LTR:ERV1:+	0.14869	0.123757	0.236838
																		chr19	29930752	29932216	LTR12C:LTR:ERV1:+	0.64716	0.267995	0.426524
																		chr19	33062313	33064020	LTR12C:LTR:ERV1:+	0.714452	0.599784	0.191029
																		chr19	33527361	33528763	LTR12C:LTR:ERV1:+	0.401379	0.619338	0.16269
																		chr19	35158915	35160136	LTR12C:LTR:ERV1:+	0.186649	0.17543	0.0148148
																		chr19	36181221	36182525	LTR12C:LTR:ERV1:-	0.0954946	0.0142974	0.17442
																		chr19	39311976	39313945	LTR12C:LTR:ERV1:+	0.895699	0.67681	0.694447
																		chr19	40675186	40676613	LTR12C:LTR:ERV1:-	0.112286	0.0632843	0.0386905
																		chr19	45065649	45067002	LTR12C:LTR:ERV1:-	0.0907832	0.0806387	0.136079
																		chr19	58668494	58669780	LTR12C:LTR:ERV1:+	0.107453	0.106103	0.348482
																		chr20	7601882	7603649	LTR12C:LTR:ERV1:-	0.874863	0.717004	0.729623
																		chr20	14024661	14025993	LTR12C:LTR:ERV1:-	0.575348	0.665166	0.323443
																		chr20	7783435	7784728	LTR12C:LTR:ERV1:-	0.0420626	0.0376612	0.102834
																		chr20	9621212	9622803	LTR12C:LTR:ERV1:-	0.470268	0.4089	0.440152
																		chr20	10012146	10013573	LTR12C:LTR:ERV1:+	0.431296	0.325808	0.36622
																		chr20	14206972	14208346	LTR12C:LTR:ERV1:+	0.0486943	0.00431209	0.05603
																		chr20	18207226	18208667	LTR12C:LTR:ERV1:+	0.078443	0.027619	0.677203
																		chr20	19619378	19620842	LTR12C:LTR:ERV1:-	0.272977	0.316447	0.0512821
																		chr20	20748908	20750690	LTR12C:LTR:ERV1:+	0.837913	0.827449	0.475889
																		chr20	21272328	21273658	LTR12C:LTR:ERV1:+	0.107541	0.0647562	0.0339901
																		chr20	24200274	24201921	LTR12C:LTR:ERV1:-	0.724329	0.265994	0.146726
																		chr20	30165388	30166918	LTR12C:LTR:ERV1:-	0.189096	0.142058	0.0354286
																		chr20	39538106	39539675	LTR12C:LTR:ERV1:-	0.512035	0.299715	0.613187
																		chr20	42927589	42929018	LTR12C:LTR:ERV1:+	0.103958	0.03768	0.0733963
																		chr20	44364362	44365816	LTR12C:LTR:ERV1:+	0.829386	0.798742	0.673986
																		chr20	44720307	44721878	LTR12C:LTR:ERV1:+	0.202399	0.0953373	0.645771
																		chr20	46687343	46688824	LTR12C:LTR:ERV1:+	0.858205	0.8757	0.452429
[truncated: 33 more rows]

## Sheet: Sheet2
Figure4-source data 2: Raw. Bar graphs showing the fraction of groups determined by DNA methylation patterns in two sperm donors.
High in PGCs	rep	rep	Common High	High and Low	Common Low	Other			Low in PGCs	Common High	High and Low	Common Low	Other
L1HS	LINE	L1	2	0	0	0			L1HS	8	0	0	1
L1PA2	LINE	L1	53	0	0	0			L1PA2	85	0	0	27
L1PA3	LINE	L1	255	0	0	2			L1PA3	49	0	0	18
L1PA4	LINE	L1	274	0	0	2			L1PA4	11	0	0	5
L1PA5	LINE	L1	177	0	0	0			L1PA5	24	0	0	2
L1PA6	LINE	L1	49	0	0	0			L1PA6	67	0	0	3
L1PA7	LINE	L1	18	0	0	0			L1PA7	104	0	0	9
L1PA8	LINE	L1	3	0	0	0			L1PA8	17	0	0	3
LTR1	LTR	ERV1	0	0	0	0			LTR1	38	0	55	14
LTR12	LTR	ERV1	13	0	0	1			LTR12	3	0	0	1
LTR12C	LTR	ERV1	369	2	54	186			LTR12C	27	1	380	238
LTR12D	LTR	ERV1	22	0	3	8			LTR12D	0	0	31	3
LTR12E	LTR	ERV1	4	0	3	5			LTR12E	1	0	16	1
LTR17	LTR	ERV1	8	0	0	0			LTR17	74	5	6	39
LTR1D	LTR	ERV1	2	0	0	0			LTR1D	7	0	11	6
MER52A	LTR	ERV1	59	0	0	0			MER52A	95	0	52	39
MER52C	LTR	ERV1	0	0	0	0			MER52C	10	0	12	3
MER52D	LTR	ERV1	10	0	0	0			MER52D	21	0	12	15
LTR13	LTR	ERVK	11	0	0	0			LTR13	33	0	2	5
HERVL-int	LTR	ERVL	0	0	0	0			HERVL-int	32	0	0	1
MLT1C	LTR	ERVL-MaLR	0	0	1	0			MLT1C	41	0	2	2
MLT1D	LTR	ERVL-MaLR	0	0	0	0			MLT1D	30	0	3	1
SVA_A	Other	Other	43	0	0	4			SVA_A	6	0	0	2
SVA_B	Other	Other	23	1	2	7			SVA_B	20	24	22	68
SVA_C	Other	Other	15	2	0	5			SVA_C	28	14	3	39
SVA_D	Other	Other	16	2	0	10			SVA_D	121	81	29	188
SVA_F	Other	Other	1	0	1	3			SVA_F	13	9	3	15

## Sheet: Sheet3
Figure4-source data 3: Raw. Violin plots showing DNA methylation levels of SVA copies in male hPGCs at 19 weeks of gestation, sperm donor1, and sperm donor2.
chr	start	end	group	humanSperm_Hammoud_donor1_merge	humanSperm_Hammoud_donor2_merge	PGC_19W_embryo1_M
chr1	91356742	91358137	SVA_D:Other:Other:-	0.209465	0.0430497	0.245238
chr1	6364453	6366296	SVA_D:Other:Other:-	0.756701	0.124711	0.105936
chr1	6774578	6776390	SVA_D:Other:Other:-	0.897553	0.340967	0.0551511
chr1	7660545	7662062	SVA_D:Other:Other:-	0.798223	0.477283	0.607465
chr1	10088443	10089824	SVA_D:Other:Other:+	0.927458	0.81245	0.117399
chr1	11365136	11366669	SVA_C:Other:Other:-	0.804039	0.119121	0.194762
chr1	12067823	12069304	SVA_C:Other:Other:-	0.909336	0.885443	0.0166667
chr1	13983865	13985572	SVA_D:Other:Other:+	0.509745	0.0518284	0.526554
chr1	21349732	21351405	SVA_F:Other:Other:+	0.896062	0.611805	0.0851989
chr1	23583263	23584911	SVA_D:Other:Other:+	0.527066	0.0942007	0.0886393
chr1	23829728	23831478	SVA_D:Other:Other:+	0.716765	0.104613	0.110749
chr1	24014644	24016257	SVA_D:Other:Other:+	0.264921	0.0424982	0.0906797
chr1	24178934	24180547	SVA_D:Other:Other:+	0.884325	0.874699	0.365556
chr1	24261448	24262987	SVA_D:Other:Other:+	0.941598	0.432093	0.074388
chr1	26921935	26924007	SVA_D:Other:Other:+	0.661474	0.0208118	0.0285714
chr1	27129382	27131339	SVA_D:Other:Other:-	0.512802	0.0915295	0.0142857
chr1	27614841	27616533	SVA_D:Other:Other:-	0.853379	0.310367	0.0352608
chr1	31648616	31650508	SVA_D:Other:Other:+	0.197103	0.023378	0.117512
chr1	33269339	33270876	SVA_B:Other:Other:-	0.596364	0.0275621	0.0724952
chr1	33774368	33775959	SVA_B:Other:Other:-	0.916192	0.85675	0.222789
chr1	34546996	34548688	SVA_B:Other:Other:+	0.16036	0.0345412	0.526683
chr1	37545338	37547744	SVA_D:Other:Other:+	0.139368	0.0773434	0.158138
chr1	39112439	39114000	SVA_D:Other:Other:+	0.470783	0.141088	0.445392
chr1	39699458	39701100	SVA_F:Other:Other:-	0.896446	0.246426	0.0466667
chr1	40273317	40274626	SVA_B:Other:Other:+	0.0944071	0.0211826	0.0638695
chr1	40334740	40336198	SVA_B:Other:Other:+	0.860566	0.341103	0.147707
chr1	40378172	40379737	SVA_D:Other:Other:-	0.655839	0.133371	0.0701754
chr1	40464693	40466308	SVA_F:Other:Other:+	0.410962	0.0310121	0.206287
chr1	43966926	43968647	SVA_D:Other:Other:+	0.18522	0.0372816	0.0273148
chr1	45341422	45342884	SVA_D:Other:Other:+	0.900766	0.340398	0.110012
chr1	45580318	45581813	SVA_B:Other:Other:-	0.0857903	0.0442391	0.026817
chr1	46189628	46191758	SVA_E:Other:Other:+	0.289213	0.0857143	0.0190972
chr1	48944380	48945924	SVA_D:Other:Other:+	0.525027	0.0405737	0.196296
chr1	51417756	51419072	SVA_B:Other:Other:+	0.920164	0.673058	0.196898
chr1	52646719	52648436	SVA_D:Other:Other:+	0.297014	0.158708	0.213955
chr1	53334917	53336580	SVA_D:Other:Other:-	0.920722	0.762648	0.133435
chr1	54698259	54700037	SVA_F:Other:Other:+	0.935235	0.897564	0.176576
chr1	76577138	76579055	SVA_D:Other:Other:-	0.25791	0.0592427	0.0105909
chr1	87364469	87366320	SVA_D:Other:Other:-	0.650286	0.0688357	0.145342
chr1	87428838	87430348	SVA_C:Other:Other:-	0.930253	0.91269	0.0651042
chr1	91753935	91755406	SVA_B:Other:Other:-	0.937832	0.909444	0.54011
chr1	92490912	92492465	SVA_B:Other:Other:-	0.280973	0.036382	0.0407867
chr1	96934652	96936203	SVA_D:Other:Other:-	0.407603	0.115678	0.154688
chr1	97227294	97229186	SVA_D:Other:Other:-	0.916515	0.722869	0.38445
chr1	98977339	98979223	SVA_D:Other:Other:-	0.468817	0.0141937	0.453671
chr1	99543518	99544985	SVA_C:Other:Other:-	0.651171	0.0394002	0.349563
chr1	99973119	99975021	SVA_B:Other:Other:+	0.911714	0.773836	0.767458
chr1	100288477	100289983	SVA_D:Other:Other:+	0.859571	0.283891	0.067619
chr1	100322017	100323420	SVA_C:Other:Other:-	0.898033	0.475942	0.251461
chr1	109078097	109079480	SVA_D:Other:Other:-	0.747642	0.0505544	0.182083
chr1	109217720	109219319	SVA_F:Other:Other:+	0.403195	0.285678	0.32452
chr1	109595264	109596821	SVA_B:Other:Other:+	0.217387	0.0389691	0.0436254
chr1	109616013	109617217	SVA_B:Other:Other:+	0.900832	0.338276	0.0902069
chr1	112149660	112151498	SVA_D:Other:Other:-	0.162266	0.0363101	0.246984
chr1	113270956	113272032	SVA_A:Other:Other:+	0.940495	0.813921	0.0744444
chr1	113605576	113607040	SVA_C:Other:Other:-	0.882472	0.239299	0.157482
chr1	114784472	114786364	SVA_A:Other:Other:+	0.867506	0.891868	0.781035
chr1	115346450	115347999	SVA_C:Other:Other:-	0.294548	0.239567	0.490463
chr1	143542208	143543631	SVA_D:Other:Other:+	0.390567	0.235809	0.402588
chr1	145667058	145669064	SVA_D:Other:Other:+	0.572044	0.0290604	0.01
chr1	145669623	145671178	SVA_C:Other:Other:-	0.294668	0.0681527	0.0532903
chr1	146532859	146534323	SVA_B:Other:Other:+	0.886228	0.649691	0.528712
chr1	146704073	146705757	SVA_D:Other:Other:+	0.882252	0.743288	0.65803
chr1	147420873	147423219	SVA_D:Other:Other:-	0.909373	0.458511	0.116731
chr1	149196673	149198801	SVA_D:Other:Other:+	0.223751	0.149437	0.0722261
chr1	150753325	150755021	SVA_F:Other:Other:+	0.850436	0.146955	0.00952381
chr1	150822718	150824352	SVA_C:Other:Other:+	0.935125	0.880322	0.0328924
chr1	151741142	151742610	SVA_C:Other:Other:-	0.909486	0.408858	0.0537815
chr1	152116612	152118175	SVA_C:Other:Other:-	0.870162	0.308115	0.488218
chr1	152167947	152169745	SVA_C:Other:Other:-	0.866289	0.697705	0.248018
chr1	152228083	152229658	SVA_D:Other:Other:-	0.670156	0.70492	0.131425
chr1	152443879	152445283	SVA_D:Other:Other:-	0.93277	0.686573	0.289706
chr1	153546935	153548457	SVA_C:Other:Other:+	0.865401	0.225616	0.105309
chr1	153554814	153556370	SVA_D:Other:Other:+	0.92111	0.208936	0.0178571
chr1	154259375	154260904	SVA_D:Other:Other:+	0.72397	0.133081	0.02
chr1	156297052	156298664	SVA_D:Other:Other:+	0.919644	0.906397	0.0211538
chr1	160501234	160503102	SVA_A:Other:Other:+	0.920173	0.838276	0.593312
chr1	160902426	160903956	SVA_B:Other:Other:+	0.0381623	0.0172352	0.339708
chr1	161392048	161394106	SVA_D:Other:Other:+	0.21187	0.04196	0.0764712
chr1	161585745	161587207	SVA_C:Other:Other:-	0.457276	0.0816871	0.201361
chr1	166998454	166999679	SVA_B:Other:Other:+	0.0898422	0.0145704	0
chr1	167740243	167741395	SVA_A:Other:Other:-	0.926852	0.936285	0.0868421
chr1	167774885	167776296	SVA_A:Other:Other:-	0.880676	0.927984	0.457636
chr1	168176404	168177894	SVA_C:Other:Other:-	0.859119	0.29816	0.717492
chr1	168805970	168807373	SVA_B:Other:Other:+	0.296055	0.0477014	0.302023
chr1	171662278	171663833	SVA_C:Other:Other:-	0.950086	0.939325	0.695938
chr1	173581711	173583401	SVA_D:Other:Other:+	0.489768	0.132626	0.454217
chr1	176026480	176027908	SVA_D:Other:Other:+	0.884078	0.62445	0.0252778
chr1	179008866	179010815	SVA_D:Other:Other:-	0.932141	0.863635	0.0420478
chr1	179103839	179105838	SVA_D:Other:Other:+	0.917075	0.835712	0.0353175
chr1	179387124	179388800	SVA_D:Other:Other:-	0.748345	0.385916	0.273935
chr1	180679339	180680767	SVA_C:Other:Other:-	0.789921	0.235033	0.443514
chr1	181979316	181980893	SVA_B:Other:Other:+	0.921072	0.299875	0.709739
chr1	182408414	182409822	SVA_D:Other:Other:-	0.754288	0.140683	0.491547
chr1	182709688	182711920	SVA_D:Other:Other:-	0.386762	0.0786878	0.162257
chr1	189108308	189109760	SVA_B:Other:Other:-	0.0982181	0.0162457	0.264354
chr1	189194152	189195869	SVA_B:Other:Other:+	0.0807398	0.0289689	0.0538889
chr1	197374171	197375722	SVA_D:Other:Other:+	0.1713	0.0139731	0.230635
chr1	202159959	202161610	SVA_D:Other:Other:-	0.893612	0.862782	0.0111111
chr1	202420320	202421730	SVA_D:Other:Other:-	0.918018	0.826738	0.224185
chr1	203810285	203811726	SVA_B:Other:Other:-	0.887494	0.629548	0.126494
chr1	206276043	206278006	SVA_D:Other:Other:-	0.573857	0.0762277	0.064881
chr1	209301782	209303557	SVA_D:Other:Other:+	0.146504	0.131284	0.284318
chr1	212187883	212189065	SVA_B:Other:Other:+	0.958865	0.516063	0.0662121
chr1	212897548	212899117	SVA_B:Other:Other:+	0.446871	0.125743	0.227586
chr1	219718311	219720226	SVA_D:Other:Other:+	0.132854	0.0267711	0.197875
chr1	220639028	220640909	SVA_D:Other:Other:-	0.846076	0.492045	0.78739
chr1	224536922	224538359	SVA_B:Other:Other:-	0.81883	0.313004	0.397788
chr1	225802715	225804045	SVA_B:Other:Other:+	0.787744	0.227466	0.0193197
chr1	225983294	225984581	SVA_A:Other:Other:-	0.939934	0.939875	0.67267
chr1	226301999	226303681	SVA_D:Other:Other:-	0.898868	0.731212	0
chr1	227319816	227321658	SVA_D:Other:Other:+	0.928738	0.603086	0.137671
chr1	227463284	227464792	SVA_B:Other:Other:+	0.862772	0.6819	0.134365
chr1	227897702	227899534	SVA_D:Other:Other:-	0.883218	0.50585	0.444512
chr1	230067068	230068363	SVA_C:Other:Other:-	0.321389	0.0119461	0.194676
chr1	231589279	231590759	SVA_B:Other:Other:+	0.765456	0.194163	0.181849
chr1	234402623	234404193	SVA_E:Other:Other:-	0.282107	0.0777253	0.0966667
chr1	235471755	235473508	SVA_D:Other:Other:+	0.919706	0.857719	0.117245
chr1	236591281	236592518	SVA_B:Other:Other:-	0.519219	0.0303652	0.047619
chr1	237290079	237291716	SVA_F:Other:Other:-	0.945634	0.457724	0.647832
chr1	237832175	237833638	SVA_D:Other:Other:-	0.900607	0.65743	0.178233
chr1	245937967	245939032	SVA_D:Other:Other:+	0.846607	0.199933	0
chr1	246525726	246527240	SVA_D:Other:Other:+	0.921238	0.653026	0.147128
chr1	247383255	247384559	SVA_D:Other:Other:+	0.905346	0.259107	0.063752
chr1	247684648	247686235	SVA_C:Other:Other:+	0.898361	0.596489	0.428207
chr1	248839625	248840880	SVA_D:Other:Other:+	0.628876	0.0922006	0.644444
chr1	249123933	249125178	SVA_B:Other:Other:+	0.91544	0.389269	0.0412179
chr2	126167	127645	SVA_E:Other:Other:+	0.400783	0	0.0692577
chr2	3616115	3617630	SVA_D:Other:Other:-	0.969462	0.853044	0.0255465
chr2	3662745	3664405	SVA_C:Other:Other:-	0.948911	0.91509	0.608326
chr2	11042072	11044034	SVA_F:Other:Other:-	0.119393	0.00341191	0
chr2	11304661	11306135	SVA_C:Other:Other:-	0.933101	0.911632	0
chr2	25856056	25857939	SVA_D:Other:Other:+	0.819518	0.13409	0.0340064
chr2	25927922	25929331	SVA_C:Other:Other:+	0.918407	0.792254	0.042741
chr2	25945507	25947023	SVA_D:Other:Other:-	0.646125	0.133173	0.134524
chr2	26132611	26134456	SVA_D:Other:Other:-	0.54072	0.0844991	0.137429
chr2	26592737	26594781	SVA_D:Other:Other:-	0.543202	0.0505612	0.110231
chr2	32518145	32520112	SVA_D:Other:Other:-	0.918493	0.526847	0.183471
chr2	32979211	32980708	SVA_D:Other:Other:-	0.716861	0.121523	0.261429
chr2	33985930	33987285	SVA_C:Other:Other:-	0.795492	0.355881	0.452163
chr2	34357577	34358998	SVA_C:Other:Other:-	0.926723	0.549772	0.482292
chr2	36406438	36408320	SVA_D:Other:Other:+	0.732669	0.248677	0.337464
chr2	38159224	38160958	SVA_D:Other:Other:-	0.902197	0.902994	0.0105263
chr2	38203995	38205494	SVA_B:Other:Other:-	0.67403	0.162054	0.0457745
chr2	38629800	38631536	SVA_D:Other:Other:+	0.959	0.666789	0.160516
chr2	38982395	38983894	SVA_D:Other:Other:-	0.835416	0.155486	0.0442857
chr2	39854662	39856386	SVA_D:Other:Other:-	0.174134	0.0047619	0.242247
chr2	42222143	42223333	SVA_D:Other:Other:+	0.897743	0.303685	0.0154321
chr2	42240869	42242785	SVA_D:Other:Other:-	0.163604	0.0958901	0.0811688
chr2	43289652	43291201	SVA_D:Other:Other:-	0.860926	0.266737	0.432729
chr2	43904342	43905900	SVA_D:Other:Other:-	0.746489	0.16229	0.266224
chr2	44293507	44295518	SVA_D:Other:Other:-	0.714019	0.0745753	0.381903
chr2	48841002	48842660	SVA_D:Other:Other:-	0.263968	0.0300137	0.396388
chr2	50638164	50639464	SVA_B:Other:Other:+	0.277815	0.0436126	0.198441
chr2	51054762	51056423	SVA_D:Other:Other:-	0.619862	0.148257	0.0505102
chr2	54322030	54324009	SVA_D:Other:Other:-	0.386686	0.0643065	0.0649068
chr2	54712294	54713871	SVA_D:Other:Other:+	0.867618	0.728768	0.1364
chr2	54925558	54926965	SVA_C:Other:Other:+	0.0663636	0.00496339	0.315955
chr2	55877270	55878924	SVA_D:Other:Other:+	0.742146	0.144041	0.0047619
chr2	62856792	62858356	SVA_C:Other:Other:+	0.754685	0.145276	0.636091
chr2	63948843	63950437	SVA_F:Other:Other:+	0.842003	0.108122	0.167373
chr2	64035437	64037039	SVA_D:Other:Other:+	0.776767	0.144686	0.535653
chr2	64268481	64269645	SVA_D:Other:Other:-	0.585155	0.116901	0.06875
chr2	71769504	71770985	SVA_C:Other:Other:-	0.331087	0.0907196	0.375534
chr2	85714147	85716186	SVA_D:Other:Other:+	0.231725	0.0562938	0.501946
chr2	86771466	86773523	SVA_A:Other:Other:-	0.953467	0.946849	0.840301
chr2	95908561	95910103	SVA_D:Other:Other:+	0.916551	0.869176	0.625622
chr2	99604642	99606203	SVA_C:Other:Other:-	0.776268	0.51319	0.547023
chr2	105867071	105868590	SVA_D:Other:Other:+	0.12194	0.0705316	0.278124
chr2	112429618	112431067	SVA_B:Other:Other:+	0.883114	0.72215	0.248214
chr2	122649618	122651368	SVA_F:Other:Other:+	0.676182	0.125213	0.132946
chr2	128110252	128111835	SVA_D:Other:Other:+	0.912432	0.88089	0.0811289
chr2	130590598	130591901	SVA_B:Other:Other:+	0.547626	0.0573924	0.311603
chr2	134820947	134822548	SVA_D:Other:Other:+	0.815772	0.499987	0.670953
chr2	135725428	135726978	SVA_D:Other:Other:-	0.737181	0.106369	0.171429
chr2	135862772	135864343	SVA_C:Other:Other:+	0.795842	0.0890664	0.20744
chr2	143459449	143460879	SVA_D:Other:Other:+	0.899974	0.139211	0.35959
chr2	153016222	153018028	SVA_D:Other:Other:+	0.961118	0.77491	0.185287
chr2	157149408	157150846	SVA_F:Other:Other:+	0.886383	0.0924509	0.338266
chr2	157307177	157309095	SVA_D:Other:Other:-	0.826974	0.13962	0.190642
chr2	159166432	159168041	SVA_B:Other:Other:-	0.808042	0.448689	0.633116
chr2	161294769	161296620	SVA_D:Other:Other:-	0.847227	0.335535	0.0647392
chr2	161304789	161306349	SVA_B:Other:Other:+	0.736749	0.112618	0.0969045
chr2	163326182	163327774	SVA_D:Other:Other:+	0.576893	0.0362142	0.423413
chr2	170431029	170432685	SVA_D:Other:Other:-	0.441998	0.0472608	0.112186
chr2	170711859	170713335	SVA_B:Other:Other:-	0.353899	0.0305811	0.0185185
chr2	171005572	171007431	SVA_D:Other:Other:+	0.417236	0.0918367	0.00549451
chr2	172630558	172632044	SVA_C:Other:Other:+	0.832053	0.277422	0.339394
chr2	173401887	173403783	SVA_D:Other:Other:+	0.912744	0.877477	0.710085
chr2	173564488	173565770	SVA_B:Other:Other:-	0.573343	0.111607	0.0805556
chr2	175972254	175973916	SVA_C:Other:Other:+	0.800379	0.180707	0.0381466
chr2	178709270	178710798	SVA_F:Other:Other:-	0.833619	0.462757	0.447718
chr2	183250551	183252161	SVA_C:Other:Other:+	0.792281	0.366288	0.652316
chr2	184343252	184344742	SVA_B:Other:Other:+	0.282091	0.127797	0.326302
chr2	184655950	184658043	SVA_A:Other:Other:-	0.949663	0.914463	0.858601
chr2	187018052	187019725	SVA_F:Other:Other:-	0.524313	0.0422576	0.246914
chr2	187336951	187338935	SVA_D:Other:Other:+	0.932795	0.792766	0.349601
chr2	188420652	188422627	SVA_D:Other:Other:+	0.882932	0.0991855	0.244079
chr2	188501014	188502909	SVA_A:Other:Other:-	0.582668	0.286532	0.741923
chr2	190517645	190519221	SVA_B:Other:Other:+	0.671228	0.0542315	0.478169
chr2	193758178	193759676	SVA_B:Other:Other:+	0.581474	0.0746227	0.0749487
chr2	196431881	196433915	SVA_F:Other:Other:+	0.103548	0.0376213	0.282307
chr2	198482775	198484476	SVA_D:Other:Other:+	0.79634	0.144587	0.146218
chr2	198560177	198562182	SVA_D:Other:Other:-	0.892753	0.424622	0.179043
chr2	201906658	201908168	SVA_B:Other:Other:+	0.793171	0.216921	0.0524943
chr2	202030310	202031707	SVA_C:Other:Other:-	0.941951	0.446529	0.02
chr2	203304471	203305553	SVA_B:Other:Other:-	0.817211	0.475492	0.105368
chr2	203399004	203400834	SVA_F:Other:Other:-	0.912465	0.461879	0.0747669
chr2	203579253	203580799	SVA_D:Other:Other:-	0.902962	0.939695	0.682768
chr2	204071104	204072520	SVA_D:Other:Other:+	0.578841	0.0873432	0.0579832
chr2	204236652	204238195	SVA_D:Other:Other:-	0.93822	0.704701	0.0885582
chr2	207035704	207037297	SVA_D:Other:Other:-	0.186324	0.0185677	0.256126
chr2	211814831	211816323	SVA_C:Other:Other:+	0.416382	0.0562859	0.319778
chr2	216027480	216029046	SVA_B:Other:Other:-	0.842798	0.269738	0.401967
chr2	219795486	219797322	SVA_D:Other:Other:+	0.895855	0.362931	0.290838
chr2	220615258	220616743	SVA_B:Other:Other:-	0.283358	0.0661459	0.501647
chr2	222756211	222757769	SVA_D:Other:Other:+	0.562224	0.105979	0.143311
chr2	230606853	230608857	SVA_D:Other:Other:+	0.204242	0.0694331	0.533863
chr2	233769785	233771888	SVA_D:Other:Other:+	0.668118	0.10285	0.0990706
chr2	234632172	234633880	SVA_F:Other:Other:-	0.446804	0.0129766	0.441897
chr2	240370634	240372123	SVA_D:Other:Other:-	0.658551	0.393272	0.685582
chr3	15203535	15205694	SVA_D:Other:Other:-	0.6175	0.344704	0.169753
chr3	51641122	51642906	SVA_B:Other:Other:-	0.765614	0.20171	0.00925926
chr3	5154918	5156388	SVA_D:Other:Other:-	0.631406	0.11689	0.218838
chr3	5284057	5285221	SVA_B:Other:Other:-	0.786869	0.173852	0.202489
chr3	9611136	9612416	SVA_C:Other:Other:+	0.581078	0.0441587	0.265375
chr3	10111143	10112829	SVA_D:Other:Other:+	0.920078	0.302222	0.0246212
chr3	12890535	12892062	SVA_D:Other:Other:-	0.865062	0.230365	0.171553
chr3	15102690	15104572	SVA_D:Other:Other:+	0.896057	0.801725	0.146627
chr3	15783307	15784862	SVA_D:Other:Other:+	0.827489	0.780224	0.694329
chr3	17020832	17022662	SVA_D:Other:Other:-	0.81667	0.306356	0.0253968
chr3	20588777	20590321	SVA_B:Other:Other:-	0.100622	0.01025	0.395419
chr3	20907651	20909313	SVA_D:Other:Other:-	0.79805	0.294034	0.378571
chr3	23912190	23913892	SVA_D:Other:Other:-	0.909802	0.855076	0
chr3	32210547	32212102	SVA_D:Other:Other:+	0.536166	0.0993482	0.268585
chr3	32704931	32706383	SVA_D:Other:Other:+	0.881512	0.268058	0.0210526
chr3	38094247	38095704	SVA_C:Other:Other:+	0.942121	0.620481	0.444243
chr3	38105502	38106877	SVA_B:Other:Other:-	0.929953	0.589125	0.372783
chr3	39268579	39270084	SVA_D:Other:Other:+	0.188571	0.0144231	0.0490575
chr3	39692376	39693504	SVA_C:Other:Other:-	0.42428	0.0671923	0.297857
chr3	39696782	39698146	SVA_B:Other:Other:+	0.116004	0.0416415	0.325134
chr3	41346682	41348664	SVA_D:Other:Other:+	0.808325	0.237574	0.114588
chr3	41881836	41883645	SVA_A:Other:Other:+	0.95319	0.933964	0.845405
chr3	42950561	42951872	SVA_B:Other:Other:-	0.95171	0.877362	0.603274
chr3	44861846	44863581	SVA_D:Other:Other:-	0.889427	0.878414	0.482653
chr3	46535391	46537171	SVA_D:Other:Other:+	0.260487	0.0486265	0.109803
chr3	47004908	47006441	SVA_D:Other:Other:+	0.939265	0.900948	0.369754
chr3	47297210	47298640	SVA_D:Other:Other:+	0.861934	0.774632	0.0756489
chr3	47350264	47351468	SVA_C:Other:Other:-	0.909198	0.466841	0.22791
chr3	48770905	48772886	SVA_D:Other:Other:+	0.779042	0.207649	0.109864
chr3	50121077	50123316	SVA_D:Other:Other:-	0.355185	0.0868812	0
chr3	50840516	50842211	SVA_B:Other:Other:-	0.965384	0.91142	0.736675
chr3	51285724	51287717	SVA_D:Other:Other:+	0.665855	0.0265058	0.614618
chr3	51345648	51347066	SVA_D:Other:Other:-	0.932402	0.938782	0.219444
chr3	51891965	51893690	SVA_D:Other:Other:+	0.950897	0.950652	0.662449
chr3	56617326	56619171	SVA_C:Other:Other:-	0.898222	0.848558	0.726047
chr3	57372027	57373421	SVA_A:Other:Other:+	0.912163	0.874041	0.61827
chr3	60912630	60913998	SVA_B:Other:Other:+	0.591179	0.211571	0.396787
chr3	61378616	61380110	SVA_B:Other:Other:-	0.935641	0.926576	0.75711
chr3	61419454	61421381	SVA_F:Other:Other:-	0.346534	0.0101428	0.154845
chr3	72836851	72838245	SVA_B:Other:Other:+	0.873537	0.196299	0.116423
chr3	75337883	75339607	SVA_D:Other:Other:+	0.720573	0.292509	0.197522
chr3	82632985	82634858	SVA_D:Other:Other:+	0.351841	0.0381675	0.364388
chr3	88352345	88353485	SVA_A:Other:Other:+	0.293875	0.0596318	0.120148
chr3	93762524	93764304	SVA_A:Other:Other:+	0.925162	0.937473	0.815789
chr3	100195773	100197869	SVA_D:Other:Other:-	0.523459	0.212427	0.55738
chr3	101269748	101271340	SVA_A:Other:Other:+	0.917085	0.908466	0.625674
chr3	102973164	102974799	SVA_D:Other:Other:-	0.807882	0.621323	0.30276
chr3	108842186	108843995	SVA_D:Other:Other:+	0.920442	0.345979	0.177602
chr3	112764488	112766439	SVA_D:Other:Other:-	0.88953	0.180958	0.503402
chr3	113177032	113178275	SVA_B:Other:Other:+	0.947483	0.892261	0.149254
chr3	116237462	116238815	SVA_B:Other:Other:+	0.430231	0.0403342	0.147101
chr3	116768854	116770341	SVA_D:Other:Other:+	0.63476	0.10541	0.451048
chr3	118960776	118962389	SVA_B:Other:Other:+	0.399919	0.0619058	0.197239
chr3	120132623	120133858	SVA_F:Other:Other:+	0.944641	0.895873	0.178968
chr3	120908902	120910380	SVA_B:Other:Other:-	0.700051	0.659419	0.676548
chr3	121407004	121408513	SVA_D:Other:Other:+	0.938816	0.524539	0.0813665
chr3	121919846	121921322	SVA_D:Other:Other:-	0.947171	0.585739	0.608333
chr3	122465463	122467245	SVA_D:Other:Other:+	0.818395	0.146912	0.399206
chr3	131670365	131672102	SVA_D:Other:Other:+	0.72348	0.0427482	0.374687
chr3	136441506	136443460	SVA_D:Other:Other:+	0.959864	0.898678	0.0253968
chr3	136916703	136918178	SVA_D:Other:Other:-	0.747905	0.108215	0.0204545
chr3	137591015	137592383	SVA_C:Other:Other:+	0.836306	0.755361	0.722037
chr3	138239621	138241142	SVA_B:Other:Other:+	0.967897	0.95664	0.848652
chr3	138503239	138504679	SVA_B:Other:Other:+	0.606836	0.151952	0.025582
chr3	145813641	145815590	SVA_E:Other:Other:+	0.899019	0.575175	0.04
chr3	164501680	164503100	SVA_B:Other:Other:+	0.821629	0.194525	0.650987
chr3	166735863	166737479	SVA_B:Other:Other:+	0.850486	0.573831	0.824084
chr3	170640753	170642317	SVA_C:Other:Other:+	0.912426	0.918165	0.649849
chr3	177130001	177131500	SVA_C:Other:Other:-	0.751144	0.562166	0.510994
chr3	177608886	177610363	SVA_D:Other:Other:-	0.538465	0.0917978	0.0403846
chr3	178749819	178751291	SVA_B:Other:Other:+	0.919106	0.892723	0.253338
chr3	179008081	179009531	SVA_F:Other:Other:-	0.628081	0.137626	0.0675214
chr3	181643101	181644451	SVA_B:Other:Other:-	0.125948	0.0680945	0.345918
chr3	184720944	184722318	SVA_D:Other:Other:-	0.870335	0.793792	0.65734
chr3	186152652	186154023	SVA_B:Other:Other:-	0.056978	0.0328336	0.111556
chr3	186528654	186530271	SVA_D:Other:Other:-	0.940682	0.919993	0.0883811
chr3	186591022	186592864	SVA_D:Other:Other:+	0.149233	0.178894	0.0352513
chr3	186602163	186603392	SVA_D:Other:Other:-	0.921651	0.420531	0.0555556
chr3	190190453	190191999	SVA_D:Other:Other:+	0.451083	0.0911043	0.67287
chr3	195326027	195327387	SVA_C:Other:Other:-	0.632152	0.524668	0.524145
chr3	195970366	195971983	SVA_C:Other:Other:+	0.92306	0.351804	0.028836
chr3	196111874	196113264	SVA_B:Other:Other:+	0.95105	0.922843	0.643834
chr3	196488023	196489546	SVA_F:Other:Other:-	0.934226	0.601776	0.0315789
chr3	197328596	197330107	SVA_D:Other:Other:-	0.882269	0.642549	0.0799172
chr4	78904327	78905965	SVA_D:Other:Other:-	0.432947	0.0524787	0.0895382
chr4	543630	545209	SVA_D:Other:Other:-	0.673942	0.0850008	0.271944
chr4	3095643	3097267	SVA_B:Other:Other:-	0.930253	0.657966	0.0181818
chr4	3539578	3541490	SVA_D:Other:Other:-	0.874811	0.787685	0.66962
chr4	6838274	6839679	SVA_B:Other:Other:-	0.851492	0.131533	0.151294
chr4	7603409	7604935	SVA_B:Other:Other:-	0.463456	0.0266447	0.247552
chr4	25250432	25251871	SVA_B:Other:Other:-	0.935138	0.775079	0.147534
chr4	28515817	28517451	SVA_D:Other:Other:-	0.690571	0.282805	0.323052
chr4	37510305	37511635	SVA_C:Other:Other:-	0.798626	0.26208	0.280132
chr4	37669823	37671675	SVA_D:Other:Other:+	0.721788	0.191439	0.0357935
chr4	37821428	37822931	SVA_C:Other:Other:+	0.872258	0.503001	0.0128205
chr4	38808432	38810315	SVA_D:Other:Other:+	0.291876	0.00912415	0.259027
chr4	40142218	40143764	SVA_D:Other:Other:-	0.885973	0.628441	0.0516425
chr4	41050657	41052151	SVA_C:Other:Other:+	0.719807	0.13142	0.0269393
chr4	41492297	41494480	SVA_A:Other:Other:-	0.936783	0.820179	0.639625
chr4	44169327	44170631	SVA_B:Other:Other:+	0.086269	0.0212967	0.228468
chr4	44183220	44184802	SVA_C:Other:Other:+	0.734095	0.090335	0.390425
chr4	46378754	46380686	SVA_D:Other:Other:+	0.179798	0.0198296	0.139947
chr4	48187834	48189464	SVA_B:Other:Other:+	0.554712	0.105455	0.0480368
chr4	48293745	48295382	SVA_C:Other:Other:+	0.844904	0.276135	0.0934815
chr4	53858151	53859577	SVA_B:Other:Other:+	0.89523	0.589294	0.304034
chr4	54005015	54006389	SVA_B:Other:Other:+	0.454888	0.0976557	0.120408
chr4	54121400	54123083	SVA_D:Other:Other:-	0.898781	0.702843	0.495682
chr4	55190959	55192736	SVA_D:Other:Other:-	0.616141	0.0472695	0.105873
chr4	57559028	57560508	SVA_D:Other:Other:-	0.581323	0.218516	0.0755245
chr4	58038669	58040267	SVA_D:Other:Other:+	0.269739	0.0245921	0.092785
chr4	58089932	58091364	SVA_D:Other:Other:+	0.166715	0.0543352	0.160183
chr4	64902391	64903851	SVA_B:Other:Other:+	0.377999	0.275069	0.557692
chr4	68502084	68503653	SVA_C:Other:Other:+	0.926075	0.752436	0.451612
chr4	70902642	70904173	SVA_B:Other:Other:+	0.790237	0.094224	0.210724
chr4	77343858	77345469	SVA_D:Other:Other:+	0.42743	0.0886782	0.0690741
chr4	78927719	78929041	SVA_B:Other:Other:-	0.0395397	0.0322299	0.114066
chr4	79468464	79470206	SVA_D:Other:Other:+	0.224094	0.0395189	0.209429
chr4	80165758	80167544	SVA_B:Other:Other:+	0.120915	0.0762209	0.38858
chr4	82998296	82999727	SVA_B:Other:Other:+	0.234995	0.0548483	0.240097
chr4	84863980	84865850	SVA_D:Other:Other:-	0.793431	0.0969495	0.252098
chr4	87916431	87917873	SVA_D:Other:Other:+	0.836487	0.138804	0.0942857
chr4	99251083	99252511	SVA_B:Other:Other:-	0.941277	0.950172	0.805782
chr4	104643820	104645205	SVA_B:Other:Other:+	0.644729	0.130974	0.431935
chr4	107241931	107243452	SVA_B:Other:Other:+	0.539804	0.0682723	0.116683
chr4	110517881	110519798	SVA_D:Other:Other:-	0.883789	0.499607	0.135476
chr4	110524266	110525556	SVA_B:Other:Other:+	0.870377	0.641965	0.475914
chr4	110598972	110600803	SVA_A:Other:Other:-	0.935292	0.92399	0.746291
chr4	113878169	113879804	SVA_D:Other:Other:-	0.640601	0.225214	0.106349
chr4	114717042	114718399	SVA_B:Other:Other:+	0.313032	0.0455869	0.486941
chr4	115437028	115438572	SVA_D:Other:Other:+	0.288903	0.0699713	0.191721
chr4	119712664	119714060	SVA_B:Other:Other:+	0.630469	0.153954	0.0124656
chr4	122159114	122160512	SVA_B:Other:Other:+	0.0706929	0.0215577	0.0887338
chr4	123732307	123734357	SVA_D:Other:Other:+	0.432749	0.0864861	0.0474545
chr4	123936338	123938270	SVA_D:Other:Other:-	0.890998	0.314714	0.325139
chr4	124605460	124606930	SVA_B:Other:Other:+	0.796029	0.712455	0.632276
chr4	127691742	127693320	SVA_B:Other:Other:+	0.350286	0.0612634	0.476987
chr4	129003968	129005815	SVA_D:Other:Other:-	0.917248	0.788331	0.0842294
chr4	139659915	139661294	SVA_C:Other:Other:+	0.173473	0.1026	0.297142
chr4	139774640	139776433	SVA_D:Other:Other:+	0.781657	0.247582	0.0599773
chr4	151874498	151875927	SVA_B:Other:Other:+	0.947497	0.767609	0.446728
chr4	151884301	151885990	SVA_B:Other:Other:+	0.930428	0.51517	0.0617406
chr4	152175469	152177202	SVA_F:Other:Other:-	0.853797	0.229032	0.148088
chr4	152311342	152312938	SVA_E:Other:Other:+	0.918153	0.24375	0.320163
chr4	152446904	152448727	SVA_D:Other:Other:-	0.935654	0.60249	0.115816
chr4	152652236	152653886	SVA_C:Other:Other:+	0.964842	0.835268	0.291705
chr4	153685787	153687290	SVA_B:Other:Other:-	0.209912	0.0607203	0.0204365
chr4	153787033	153788705	SVA_D:Other:Other:-	0.920822	0.729719	0.177579
chr4	159666937	159668611	SVA_D:Other:Other:-	0.535489	0.134173	0.00909091
chr4	159680330	159681480	SVA_A:Other:Other:+	0.962762	0.693026	0.115424
chr4	159802560	159804167	SVA_C:Other:Other:+	0.908151	0.279218	0.327143
chr4	165940372	165942089	SVA_D:Other:Other:-	0.407182	0.00745625	0.0963745
chr4	170490608	170492323	SVA_D:Other:Other:+	0.926552	0.795133	0.0950864
chr4	170599574	170601099	SVA_B:Other:Other:-	0.544433	0.0896407	0.398874
chr4	170748907	170750389	SVA_B:Other:Other:+	0.0626804	0.00979269	0.0918791
chr4	170966872	170968713	SVA_D:Other:Other:+	0.148977	0.072364	0.0244444
chr4	171086797	171088279	SVA_B:Other:Other:-	0.897998	0.430709	0.345082
chr4	175612516	175614107	SVA_D:Other:Other:+	0.941051	0.579436	0.556956
chr4	183961293	183962868	SVA_D:Other:Other:-	0.957217	0.487154	0.025
chr4	184739256	184740749	SVA_C:Other:Other:-	0.925023	0.623321	0.097619
chr4	188578632	188580034	SVA_D:Other:Other:+	0.894396	0.239862	0.309108
chr4	188912091	188913149	SVA_D:Other:Other:-	0.120358	0.086264	0.0648287
chr5	1585531	1587428	SVA_D:Other:Other:+	0.940883	0.909492	0.814413
chr5	16276283	16278012	SVA_F:Other:Other:-	0.903799	0.289276	0.691671
chr5	18309070	18310851	SVA_D:Other:Other:+	0.401956	0.0923907	0.438925
chr5	32141682	32143573	SVA_D:Other:Other:+	0.923192	0.652183	0.0226498
chr5	37012563	37014358	SVA_D:Other:Other:-	0.938437	0.919432	0.0598828
chr5	37295138	37296790	SVA_D:Other:Other:+	0.951367	0.896625	0.0205882
chr5	37414883	37416667	SVA_D:Other:Other:-	0.927826	0.215954	0.112649
chr5	37483203	37484697	SVA_C:Other:Other:-	0.882781	0.87905	0.639535
chr5	38861219	38863315	SVA_D:Other:Other:-	0.588854	0.273103	0.468358
chr5	42979911	42981491	SVA_D:Other:Other:+	0.910389	0.405153	0.0255952
chr5	43510528	43512148	SVA_C:Other:Other:+	0.923588	0.914539	0.0282738
chr5	43521580	43523181	SVA_D:Other:Other:+	0.920478	0.460285	0.0924825
chr5	43665344	43666731	SVA_B:Other:Other:-	0.752287	0.122771	0.150188
chr5	43745274	43747244	SVA_B:Other:Other:-	0.759355	0.569135	0.366177
chr5	45890044	45891729	SVA_C:Other:Other:+	0.6303	0.662346	0.633047
chr5	49903279	49904972	SVA_A:Other:Other:+	0.445906	0.127739	0.688133
chr5	50069671	50071412	SVA_A:Other:Other:-	0.952369	0.926941	0.797533
chr5	53676571	53678077	SVA_D:Other:Other:+	0.26516	0.0596234	0.33033
chr5	53715872	53717236	SVA_C:Other:Other:-	0.435095	0.114529	0.243563
chr5	55309745	55311848	SVA_D:Other:Other:-	0.583566	0.0980751	0.436852
chr5	55667732	55669319	SVA_D:Other:Other:+	0.930342	0.199461	0.312526
chr5	55693047	55694468	SVA_B:Other:Other:-	0.680463	0.106078	0.477403
chr5	56813728	56815025	SVA_A:Other:Other:-	0.903669	0.738066	0.430886
chr5	59726368	59727946	SVA_D:Other:Other:-	0.916861	0.674431	0.175863
chr5	61808434	61810466	SVA_D:Other:Other:-	0.8212	0.386496	0.0918519
chr5	62379046	62380495	SVA_D:Other:Other:-	0.742342	0.284233	0.149327
chr5	65253068	65254498	SVA_C:Other:Other:-	0.886612	0.149475	0.0685752
chr5	67618929	67620426	SVA_D:Other:Other:-	0.69368	0.106535	0.124334
chr5	68358093	68359665	SVA_D:Other:Other:-	0.224912	0.0676483	0.0642857
chr5	68810356	68812368	SVA_D:Other:Other:-	0.870076	0.30396	0.0484782
chr5	70846940	70848682	SVA_D:Other:Other:-	0.915625	0.819185	0.0186667
chr5	71089137	71091085	SVA_A:Other:Other:-	0.880269	0.824464	0.773439
chr5	75846177	75847723	SVA_B:Other:Other:-	0.46452	0.0991717	0.197828
chr5	76107393	76109499	SVA_D:Other:Other:+	0.263288	0.056408	0.113651
chr5	77056219	77057475	SVA_A:Other:Other:+	0.956091	0.945129	0.277778
chr5	77686475	77687882	SVA_D:Other:Other:-	0.961205	0.569148	0.124286
chr5	79596364	79598167	SVA_D:Other:Other:+	0.892089	0.166773	0.0963719
chr5	81278384	81280269	SVA_D:Other:Other:-	0.876926	0.752876	0.0779762
chr5	87911037	87912636	SVA_D:Other:Other:+	0.678932	0.0830816	0.1902
chr5	93321102	93322730	SVA_B:Other:Other:+	0.911273	0.609044	0.805181
chr5	100120896	100122138	SVA_A:Other:Other:+	0.932455	0.900753	0.620834
chr5	105194584	105195930	SVA_C:Other:Other:+	0.574066	0.0763584	0.568555
chr5	108327587	108329296	SVA_D:Other:Other:-	0.912493	0.818704	0.404767
chr5	109167874	109169419	SVA_B:Other:Other:-	0.911528	0.476633	0.402656
chr5	111695977	111697232	SVA_B:Other:Other:+	0.869098	0.543469	0.105861
chr5	112289880	112291497	SVA_D:Other:Other:+	0.693997	0.0802073	0.125794
chr5	116337459	116338630	SVA_D:Other:Other:-	0.585091	0.067134	0.408315
chr5	116934694	116936530	SVA_D:Other:Other:-	0.179703	0.0275714	0.0875902
chr5	117617675	117619233	SVA_C:Other:Other:+	0.267862	0.0940848	0.145816
chr5	118300089	118301646	SVA_C:Other:Other:+	0.942613	0.872775	0.286417
chr5	118334154	118335407	SVA_B:Other:Other:+	0.945257	0.818584	0.59512
chr5	118456986	118459044	SVA_D:Other:Other:-	0.942092	0.787551	0.198173
chr5	119483080	119484441	SVA_C:Other:Other:+	0.876599	0.345253	0.356495
chr5	122248429	122249846	SVA_D:Other:Other:-	0.904028	0.83223	0.530724
chr5	132318083	132319679	SVA_D:Other:Other:-	0.519707	0.137822	0.257143
chr5	133192864	133194574	SVA_A:Other:Other:-	0.933423	0.924508	0.664323
chr5	134744240	134745673	SVA_C:Other:Other:+	0.255211	0.00520403	0.201611
chr5	136872689	136874819	SVA_D:Other:Other:-	0.856843	0.482634	0.431019
chr5	138111732	138113595	SVA_D:Other:Other:-	0.841775	0.817038	0.225714
chr5	138391320	138393022	SVA_D:Other:Other:+	0.813584	0.139144	0.112665
chr5	138447514	138448979	SVA_C:Other:Other:+	0.416419	0.146554	0.167536
chr5	138505515	138507406	SVA_D:Other:Other:+	0.901777	0.280173	0.223507
chr5	139806123	139808266	SVA_D:Other:Other:-	0.886718	0.616913	0.105754
chr5	149049095	149051004	SVA_D:Other:Other:-	0.403704	0.0239279	0.465942
chr5	151092961	151094416	SVA_C:Other:Other:-	0.315401	0.0191638	0.144593
chr5	151858802	151860427	SVA_C:Other:Other:-	0.819776	0.235985	0.426897
chr5	156366958	156368344	SVA_B:Other:Other:+	0.240381	0.0691815	0.394132
chr5	156440514	156442109	SVA_D:Other:Other:+	0.792115	0.529595	0.495355
chr5	156845946	156847661	SVA_D:Other:Other:+	0.910657	0.825553	0.568787
chr5	157463380	157465057	SVA_B:Other:Other:-	0.217892	0.10442	0.506533
chr5	163010063	163011620	SVA_B:Other:Other:-	0.214492	0.0324535	0.301852
chr5	168069655	168071472	SVA_F:Other:Other:-	0.839775	0.122678	0.00958188
chr5	175678584	175680162	SVA_D:Other:Other:-	0.944112	0.895369	0.499288
chr5	175860141	175861816	SVA_D:Other:Other:+	0.870613	0.698391	0.684893
chr5	176410225	176412107	SVA_A:Other:Other:+	0.91093	0.95518	0.761524
chr5	179261430	179262696	SVA_D:Other:Other:-	0.94023	0.963789	0.0285714
chr5	179957566	179959000	SVA_B:Other:Other:-	0.942641	0.906342	0.107961
chr5	180197674	180198773	SVA_D:Other:Other:-	0.607334	0.104423	0.39
chr6	52689549	52691167	SVA_A:Other:Other:+	0.896181	0.858386	0.559161
chr6	87948407	87950111	SVA_C:Other:Other:-	0.933883	0.892011	0.0980392
chr6	5835119	5836932	SVA_D:Other:Other:-	0.432198	0.121862	0.45592
chr6	13133498	13135040	SVA_B:Other:Other:+	0.114209	0.00411817	0.316687
chr6	15415045	15416973	SVA_D:Other:Other:-	0.921581	0.246062	0.185268
chr6	15725806	15727588	SVA_D:Other:Other:-	0.425896	0.116283	0.11263
chr6	17734907	17736765	SVA_D:Other:Other:-	0.919506	0.824684	0.24758
chr6	25585775	25587246	SVA_B:Other:Other:-	0.63392	0.0998629	0.161138
chr6	27620654	27622181	SVA_B:Other:Other:+	0.133505	0.0240067	0.0139847
chr6	28469291	28470908	SVA_B:Other:Other:+	0.300307	0.0867925	0.0737107
chr6	33452841	33454399	SVA_D:Other:Other:-	0.803347	0.213435	0.347741
chr6	33799714	33801379	SVA_D:Other:Other:-	0.559053	0.0940265	0.10904
chr6	34753552	34755313	SVA_D:Other:Other:+	0.886957	0.14985	0.0181818
chr6	42653815	42655248	SVA_B:Other:Other:-	0.890626	0.269982	0.0442939
chr6	43392360	43393726	SVA_C:Other:Other:+	0.820284	0.178397	0.0622688
chr6	47411093	47412397	SVA_B:Other:Other:-	0.0989901	0.0317611	0.0615232
chr6	47472762	47474516	SVA_F:Other:Other:-	0.865311	0.775624	0.0656002
chr6	50777162	50778528	SVA_C:Other:Other:-	0.793692	0.176114	0.133486
chr6	52519789	52521773	SVA_D:Other:Other:-	0.469932	0.0591072	0.0454832
chr6	53169266	53171062	SVA_D:Other:Other:-	0.45317	0.0338308	0.0709596
chr6	55774113	55775827	SVA_D:Other:Other:-	0.429774	0.122242	0.300315
chr6	56688783	56690317	SVA_D:Other:Other:+	0.929095	0.823609	0.0714727
chr6	57912045	57913422	SVA_B:Other:Other:+	0.398805	0.23544	0.202907
chr6	58516329	58517729	SVA_B:Other:Other:+	0.390044	0.0563599	0.389832
chr6	58583367	58584872	SVA_C:Other:Other:+	0.583304	0.473327	0.649013
chr6	63873239	63875126	SVA_A:Other:Other:+	0.362041	0.264227	0.466232
chr6	66806056	66807531	SVA_C:Other:Other:-	0.831091	0.294039	0.0770308
chr6	69830897	69832395	SVA_A:Other:Other:-	0.924984	0.853661	0.611806
chr6	71975115	71977144	SVA_D:Other:Other:-	0.543329	0.320766	0.417896
chr6	74369587	74371468	SVA_D:Other:Other:-	0.923353	0.894184	0.111765
chr6	74560127	74561707	SVA_D:Other:Other:-	0.824116	0.422782	0.348633
chr6	74964237	74965712	SVA_C:Other:Other:-	0.862484	0.54227	0.56178
chr6	84953492	84955343	SVA_D:Other:Other:-	0.15516	0.0369295	0.243067
chr6	86547632	86549418	SVA_D:Other:Other:+	0.501737	0.412555	0.503815
chr6	88445060	88446591	SVA_C:Other:Other:-	0.90026	0.737712	0.611929
chr6	99589218	99590754	SVA_D:Other:Other:+	0.841131	0.264306	0.271875
chr6	100097411	100098917	SVA_D:Other:Other:-	0.488893	0.0729407	0.377108
chr6	105438437	105439902	SVA_C:Other:Other:-	0.923742	0.631901	0.212245
chr6	106300985	106302823	SVA_D:Other:Other:-	0.105848	0.0549524	0.138492
chr6	108123913	108125270	SVA_D:Other:Other:+	0.574852	0	0.00454545
chr6	108254883	108256987	SVA_D:Other:Other:+	0.907284	0.796862	0.173769
chr6	108590439	108592150	SVA_D:Other:Other:+	0.914379	0.21376	0.0102041
chr6	109367324	109369317	SVA_F:Other:Other:+	0.851974	0.140758	0.116883
chr6	111337886	111339446	SVA_C:Other:Other:-	0.91784	0.588256	0.161362
chr6	112368273	112369575	SVA_D:Other:Other:+	0.832236	0.0694952	0.126927
chr6	112848862	112850423	SVA_D:Other:Other:-	0.302199	0.112995	0.123281
chr6	114252728	114253966	SVA_B:Other:Other:+	0.403922	0.106074	0.118192
chr6	118071534	118072820	SVA_C:Other:Other:+	0.883802	0.855227	0.607276
chr6	122050227	122051551	SVA_B:Other:Other:-	0.922728	0.761177	0.71252
chr6	126091310	126092814	SVA_C:Other:Other:+	0.0940803	0.0128434	0.0992932
chr6	135684208	135686081	SVA_D:Other:Other:-	0.784225	0.395566	0.30178
chr6	140694355	140695864	SVA_C:Other:Other:-	0.747159	0.178775	0.622001
chr6	144753814	144755474	SVA_D:Other:Other:-	0.957154	0.700163	0.158048
chr6	144790839	144792208	SVA_B:Other:Other:-	0.69513	0.150396	0.37048
chr6	150106542	150108468	SVA_D:Other:Other:-	0.86221	0.39642	0.0595571
chr6	150828082	150829367	SVA_B:Other:Other:+	0.493616	0.0544376	0.0146199
chr6	151770764	151772353	SVA_D:Other:Other:+	0.854558	0.607902	0.130266
chr6	155007770	155009399	SVA_D:Other:Other:+	0.14244	0.0371996	0.0652611
chr6	155286732	155288566	SVA_D:Other:Other:-	0.890849	0.423723	0.254669
chr6	156990798	156992316	SVA_D:Other:Other:+	0.551235	0.0998719	0.524157
chr6	158729032	158730974	SVA_D:Other:Other:-	0.933445	0.571335	0.392857
chr6	159827755	159829213	SVA_B:Other:Other:+	0.0721146	0.0739873	0.344674
chr6	162759312	162761189	SVA_F:Other:Other:+	0.850692	0.324654	0.0766245
chr6	170256026	170257805	SVA_A:Other:Other:-	0.952532	0.955692	0.694224
chr7	2200738	2202237	SVA_B:Other:Other:+	0.917993	0.780171	0.0733178
chr7	2341724	2343603	SVA_D:Other:Other:+	0.902208	0.88305	0.079196
chr7	2573125	2574918	SVA_E:Other:Other:-	0.628327	0.205955	0.0153846
chr7	4662941	4664548	SVA_D:Other:Other:+	0.912357	0.810272	0.20369
chr7	5775739	5777149	SVA_C:Other:Other:+	0.937476	0.933228	0.054386
chr7	7013997	7015756	SVA_D:Other:Other:-	0.810464	0.809566	0.593525
chr7	8929573	8930932	SVA_D:Other:Other:+	0.34236	0.011858	0.0747288
chr7	13141599	13143290	SVA_D:Other:Other:+	0.617564	0.0716445	0.0785714
chr7	20707325	20709366	SVA_E:Other:Other:+	0.390904	0.286353	0.16014
chr7	22839828	22841483	SVA_D:Other:Other:+	0.525479	0.0221749	0.0746032
chr7	23084915	23087035	SVA_D:Other:Other:-	0.534532	0.0707591	0.50368
chr7	26187081	26188695	SVA_D:Other:Other:+	0.918525	0.280572	0.0357336
chr7	26215479	26217248	SVA_A:Other:Other:-	0.944985	0.905435	0.323118
chr7	26300852	26302656	SVA_D:Other:Other:+	0.606326	0.0631876	0.108601
chr7	28026249	28027823	SVA_B:Other:Other:+	0.95436	0.88322	0.698157
chr7	29302616	29304445	SVA_B:Other:Other:+	0.222457	0.0802096	0.134084
chr7	33343130	33344762	SVA_A:Other:Other:+	0.887554	0.887227	0.80526
chr7	36236044	36237518	SVA_D:Other:Other:+	0.329067	0.0301916	0.0892514
chr7	44909929	44912260	SVA_A:Other:Other:-	0.848638	0.699949	0.747597
chr7	47961480	47962945	SVA_B:Other:Other:+	0.646879	0.207061	0.237736
chr7	47998379	47999985	SVA_D:Other:Other:+	0.899706	0.858015	0
chr7	50526617	50528763	SVA_D:Other:Other:+	0.344597	0.0680861	0.381048
chr7	51275134	51276762	SVA_D:Other:Other:+	0.916528	0.852666	0.169468
chr7	54511196	54512827	SVA_A:Other:Other:+	0.851719	0.681341	0.693237
chr7	54734724	54736467	SVA_D:Other:Other:-	0.117747	0.0473251	0.0259921
chr7	55469238	55471173	SVA_D:Other:Other:-	0.953137	0.855721	0.399134
chr7	62059486	62061081	SVA_D:Other:Other:-	0.550585	0.580954	0.636485
chr7	64013978	64015384	SVA_B:Other:Other:+	0.774272	0.144752	0.123698
chr7	64037207	64038509	SVA_D:Other:Other:+	0.0614245	0.00906104	0.244475
chr7	64177666	64179262	SVA_D:Other:Other:+	0.712532	0.0517529	0.0137709
chr7	64198162	64199994	SVA_D:Other:Other:-	0.395618	0.0299645	0.13647
chr7	64244516	64246091	SVA_D:Other:Other:+	0.809192	0.0909469	0.148193
chr7	64493300	64494762	SVA_C:Other:Other:+	0.903589	0.54457	0.0300899
chr7	64717713	64719160	SVA_C:Other:Other:+	0.61486	0.0641986	0.169826
chr7	66079040	66080493	SVA_C:Other:Other:+	0.375618	0.0358195	0.0570282
chr7	72697294	72699357	SVA_F:Other:Other:-	0.133004	0.0280761	0.0513822
chr7	73210948	73212455	SVA_D:Other:Other:-	0.780776	0.0512072	0
chr7	77162220	77164102	SVA_D:Other:Other:-	0.238529	0.0470517	0.140765
chr7	82754023	82755219	SVA_B:Other:Other:+	0.890403	0.249705	0.373477
chr7	87894795	87896742	SVA_D:Other:Other:-	0.509138	0.0746151	0.162821
chr7	91655618	91657622	SVA_A:Other:Other:+	0.946768	0.956743	0.826415
chr7	92173722	92175177	SVA_B:Other:Other:-	0.200573	0.0899123	0.0182073
chr7	99023774	99025740	SVA_D:Other:Other:+	0.947222	0.90332	0.136742
chr7	99484931	99486888	SVA_D:Other:Other:-	0.27468	0.0637413	0.426869
chr7	100735043	100736635	SVA_C:Other:Other:+	0.424835	0.0138485	0.0459711
chr7	107487963	107489498	SVA_C:Other:Other:+	0.180254	0.0721607	0.270179
chr7	107895591	107897080	SVA_B:Other:Other:+	0.597878	0.10215	0.156186
chr7	112336700	112338133	SVA_C:Other:Other:-	0.530742	0.055538	0.250959
chr7	112561993	112563526	SVA_D:Other:Other:+	0.934156	0.950596	0.462722
chr7	128102916	128104338	SVA_B:Other:Other:+	0.523594	0.0239851	0.0925265
chr7	128216063	128217799	SVA_D:Other:Other:-	0.959525	0.793053	0.192162
chr7	128328825	128330475	SVA_C:Other:Other:+	0.510224	0.124092	0.0667427
chr7	128855557	128857119	SVA_A:Other:Other:+	0.9356	0.922109	0.364538
chr7	129115404	129117062	SVA_C:Other:Other:-	0.505026	0.143064	0.0655303
chr7	129302607	129304014	SVA_A:Other:Other:-	0.935987	0.926222	0.57434
chr7	132861693	132863088	SVA_D:Other:Other:+	0.378628	0.0338993	0.527571
chr7	138785546	138786765	SVA_C:Other:Other:+	0.137215	0.0444773	0.0203373
chr7	138909642	138911725	SVA_A:Other:Other:+	0.950448	0.687945	0.649863
chr7	139204121	139205837	SVA_D:Other:Other:-	0.134154	0.0458204	0.0727243
chr7	139813971	139815612	SVA_C:Other:Other:+	0.928126	0.382349	0.122643
chr7	149894933	149896716	SVA_F:Other:Other:+	0.21754	0.050353	0.20406
chr7	153011131	153013316	SVA_D:Other:Other:-	0.920062	0.640447	0.642875
chr7	154887999	154889161	SVA_A:Other:Other:-	0.459408	0.316798	0.373079
chr8	57933761	57935734	SVA_D:Other:Other:+	0.410227	0.0837893	0.422649
chr8	117309243	117310620	SVA_B:Other:Other:+	0.676054	0.066068	0.224295
chr8	142211666	142213293	SVA_D:Other:Other:-	0.949681	0.611639	0.0131579
chr8	5582261	5583743	SVA_D:Other:Other:+	0.80662	0.387355	0.274898
chr8	11186832	11188441	SVA_C:Other:Other:+	0.784381	0.237444	0.423602
chr8	15302825	15304274	SVA_B:Other:Other:-	0.599443	0.108071	0.205205
chr8	21569194	21570568	SVA_D:Other:Other:-	0.884155	0.434414	0.399464
chr8	24959956	24961402	SVA_B:Other:Other:+	0.091654	0.0887116	0.574588
chr8	30103440	30105448	SVA_E:Other:Other:-	0.222125	0.0287179	0.138933
chr8	33515055	33516771	SVA_D:Other:Other:-	0.94654	0.81306	0.558943
chr8	37784600	37786231	SVA_D:Other:Other:+	0.780481	0.266217	0.107586
chr8	40353343	40354804	SVA_B:Other:Other:-	0.2037	0.0387688	0.357651
chr8	42773566	42775096	SVA_B:Other:Other:-	0.840328	0.487713	0.0172258
chr8	42793876	42795676	SVA_D:Other:Other:-	0.911359	0.85433	0.574214
chr8	42887538	42889170	SVA_D:Other:Other:-	0.513704	0.100775	0.18533
chr8	43273772	43275680	SVA_D:Other:Other:-	0.663237	0.679616	0.610941
chr8	48049109	48050300	SVA_A:Other:Other:+	0.852012	0.841825	0.367978
chr8	49953452	49954904	SVA_B:Other:Other:-	0.916182	0.863548	0.381508
chr8	52070966	52072762	SVA_D:Other:Other:+	0.238827	0.100896	0.216112
chr8	54997527	54999004	SVA_B:Other:Other:+	0.958443	0.928147	0.262665
chr8	57183941	57185581	SVA_D:Other:Other:-	0.802555	0.61412	0.468034
chr8	57983370	57984835	SVA_D:Other:Other:-	0.419834	0.0566594	0.109751
chr8	59588379	59589853	SVA_D:Other:Other:-	0.598001	0.0712155	0
chr8	64091778	64093543	SVA_D:Other:Other:-	0.937	0.937693	0.0111111
chr8	66528373	66529865	SVA_C:Other:Other:+	0.876923	0.731341	0.178661
chr8	66574289	66575782	SVA_D:Other:Other:+	0.23561	0.06288	0.0768185
chr8	67143863	67145689	SVA_D:Other:Other:+	0.486448	0.0453822	0.393879
chr8	68078962	68080587	SVA_C:Other:Other:-	0.864916	0.828137	0.344111
chr8	70157208	70159111	SVA_D:Other:Other:+	0.816467	0.327858	0.350611
chr8	74756392	74757961	SVA_B:Other:Other:+	0.906258	0.723635	0.291195
chr8	87401385	87402965	SVA_B:Other:Other:-	0.82663	0.217488	0.167493
chr8	87435472	87437087	SVA_C:Other:Other:-	0.919097	0.269647	0.724892
chr8	87705690	87707570	SVA_D:Other:Other:-	0.477189	0.146792	0.676792
chr8	90710428	90712376	SVA_D:Other:Other:+	0.708898	0.110818	0.202836
chr8	94050857	94052455	SVA_D:Other:Other:+	0.0452807	0.161692	0.294141
chr8	99063342	99064773	SVA_B:Other:Other:-	0.87627	0.383892	0.169426
chr8	100039971	100042000	SVA_E:Other:Other:-	0.490488	0.0479319	0.181984
chr8	100938815	100940265	SVA_C:Other:Other:+	0.577899	0.0771499	0.505035
chr8	101362956	101364409	SVA_B:Other:Other:+	0.130785	0.083886	0.112169
chr8	118438441	118440313	SVA_A:Other:Other:+	0.879	0.824621	0.729212
chr8	118789313	118790649	SVA_B:Other:Other:+	0.504739	0.115881	0.568617
chr8	125443552	125445127	SVA_D:Other:Other:-	0.932631	0.286661	0.235043
chr8	143907787	143909267	SVA_B:Other:Other:-	0.920851	0.87451	0.461022
chr9	26214188	26215959	SVA_B:Other:Other:-	0.193086	0.0143832	0.637851
chr9	6622268	6623631	SVA_D:Other:Other:+	0.790742	0.194186	0.1963
chr9	6798252	6799617	SVA_D:Other:Other:-	0.929243	0.636919	0.135022
chr9	6806926	6808710	SVA_F:Other:Other:+	0.203089	0.0334126	0.00308642
chr9	6948489	6949866	SVA_C:Other:Other:-	0.896465	0.432082	0.0584795
chr9	10449042	10450256	SVA_B:Other:Other:+	0.489368	0.153609	0.244608
chr9	15233321	15235035	SVA_D:Other:Other:+	0.240548	0.108174	0.102912
chr9	15441388	15443216	SVA_C:Other:Other:-	0.908158	0.320102	0.0761905
chr9	16976740	16978368	SVA_D:Other:Other:-	0.766559	0.204881	0.136766
chr9	19433151	19434757	SVA_D:Other:Other:-	0.767377	0.245853	0.0698413
chr9	26491971	26493977	SVA_A:Other:Other:+	0.918166	0.846862	0.601152
chr9	26663622	26665223	SVA_B:Other:Other:+	0.121991	0.0577894	0.546067
chr9	29188015	29190063	SVA_D:Other:Other:-	0.111181	0.0442469	0.0798128
chr9	33600248	33601835	SVA_D:Other:Other:+	0.879679	0.57551	0.0766213
chr9	33667068	33668368	SVA_C:Other:Other:+	0.939608	0.943404	0.348401
chr9	34038297	34039862	SVA_C:Other:Other:+	0.853083	0.670373	0.0427767
chr9	34136812	34138764	SVA_D:Other:Other:+	0.446611	0.0151504	0.0583333
chr9	34936033	34937661	SVA_D:Other:Other:+	0.809032	0.218054	0.0815986
chr9	35182468	35184754	SVA_A:Other:Other:-	0.912626	0.68845	0.739129
chr9	75420454	75422200	SVA_F:Other:Other:-	0.770418	0.140298	0.114576
chr9	76811726	76813550	SVA_D:Other:Other:+	0.870718	0.529455	0.337946
chr9	77467376	77468780	SVA_B:Other:Other:+	0.228491	0.0376356	0.0165945
chr9	79569745	79571201	SVA_D:Other:Other:+	0.749187	0.0974114	0.0566709
chr9	79675073	79676561	SVA_D:Other:Other:-	0.767108	0.158419	0.0404971
chr9	80317021	80318796	SVA_B:Other:Other:-	0.272234	0.0145658	0.246268
chr9	85886978	85888541	SVA_C:Other:Other:+	0.659919	0.334731	0.480677
chr9	86418137	86420398	SVA_D:Other:Other:+	0.91538	0.815344	0.0950476
chr9	86562427	86564023	SVA_B:Other:Other:+	0.615024	0.0561637	0.025
chr9	88187986	88189399	SVA_D:Other:Other:+	0.880016	0.87384	0.106012
chr9	88926480	88928041	SVA_D:Other:Other:+	0.91337	0.836021	0.114167
chr9	91240387	91241961	SVA_F:Other:Other:+	0.476945	0.0564103	0.681719
chr9	99477331	99478828	SVA_B:Other:Other:-	0.188447	0.068918	0.0580247
chr9	99892019	99893568	SVA_A:Other:Other:-	0.938901	0.960672	0.34619
chr9	100558225	100559934	SVA_D:Other:Other:+	0.923283	0.164162	0.25034
chr9	101225885	101227416	SVA_A:Other:Other:+	0.93478	0.88512	0.665853
chr9	102829438	102831589	SVA_D:Other:Other:+	0.606028	0.105556	0.153163
chr9	103154466	103156164	SVA_A:Other:Other:+	0.92849	0.918253	0.682263
chr9	105364981	105366612	SVA_B:Other:Other:-	0.951412	0.861442	0.60256
chr9	106996513	106998391	SVA_A:Other:Other:-	0.835649	0.730143	0.721664
chr9	107078317	107079714	SVA_A:Other:Other:+	0.170487	0.0688823	0.471613
chr9	107251503	107252892	SVA_B:Other:Other:-	0.512334	0.0324013	0.203458
chr9	112859254	112860461	SVA_D:Other:Other:-	0.966976	0.764749	0.225397
chr9	114379146	114380572	SVA_C:Other:Other:-	0.660871	0.0785392	0
chr9	119602162	119603649	SVA_D:Other:Other:-	0.293981	0.0996019	0.0707757
chr9	121439619	121441377	SVA_B:Other:Other:-	0.126669	0.0281504	0.246567
chr9	123066663	123068090	SVA_D:Other:Other:+	0.720849	0.0943577	0.105017
chr9	125473049	125474222	SVA_D:Other:Other:+	0.936258	0.712562	0.128747
chr9	125613736	125615676	SVA_D:Other:Other:+	0.899803	0.760265	0.0558191
chr9	125818760	125820365	SVA_D:Other:Other:-	0.916856	0.912823	0.0339027
chr9	127870076	127871633	SVA_C:Other:Other:+	0.891029	0.124372	0.0132488
chr9	128090473	128091391	SVA_F:Other:Other:-	0.95078	0.638653	0.0263736
chr9	128220494	128222152	SVA_D:Other:Other:-	0.146004	0.0592613	0.398733
chr9	128338758	128340720	SVA_D:Other:Other:+	0.931727	0.449983	0.45212
chr9	131541763	131543445	SVA_D:Other:Other:+	0.63455	0.0776262	0.107982
chr9	134782583	134784278	SVA_D:Other:Other:+	0.881993	0.857807	0.0783958
chr9	136940252	136941699	SVA_B:Other:Other:+	0.898142	0.682748	0.64837
chrX	12980723	12982554	SVA_D:Other:Other:+	0.91459	0.0643236	0.100752
chrX	14320234	14321594	SVA_C:Other:Other:-	0.853956	0.254818	0.196508
chrX	17262397	17263920	SVA_C:Other:Other:-	0.656358	0.22843	0.254935
chrX	25923348	25924909	SVA_B:Other:Other:+	0.365553	0.0777449	0.145095
chrX	27475931	27477677	SVA_A:Other:Other:+	0.908851	0.355464	0.722842
chrX	30771476	30772893	SVA_D:Other:Other:-	0.954333	0.796861	0.0439815
chrX	41470975	41472901	SVA_D:Other:Other:+	0.754017	0.1644	0.05625
chrX	44769748	44771317	SVA_C:Other:Other:-	0.910348	0.688252	0.130952
chrX	45362500	45364166	SVA_B:Other:Other:-	0.906107	0.527902	0.356277
chrX	46134172	46136097	SVA_F:Other:Other:+	0.549763	0.15102	0.573864
chrX	50861418	50863352	SVA_B:Other:Other:-	0.687851	0.321271	0.640729
chrX	53530356	53532064	SVA_C:Other:Other:+	0.883504	0.36071	0.423214
chrX	53748040	53749425	SVA_B:Other:Other:+	0.138799	0.0487179	0.156349
chrX	54154909	54156495	SVA_D:Other:Other:-	0.863397	0.303815	0
chrX	54762248	54763838	SVA_B:Other:Other:+	0.72805	0.699659	0.667657
chrX	56405914	56407647	SVA_C:Other:Other:-	0.358182	0.286434	0.35381
chrX	62612275	62614049	SVA_D:Other:Other:+	0.567364	0.382183	0.49482
chrX	64611644	64613145	SVA_B:Other:Other:+	0.554538	0.549463	0.44248
chrX	64676339	64677962	SVA_E:Other:Other:+	0.813474	0.808321	0.84229
chrX	65194547	65195875	SVA_B:Other:Other:-	0.587167	0.255886	0.0559524
chrX	69342263	69343752	SVA_B:Other:Other:+	0.0754614	0.0147501	0.301677
chrX	69568202	69570389	SVA_A:Other:Other:-	0.935087	0.846879	0.716255
chrX	70560526	70562436	SVA_D:Other:Other:-	0.806936	0.233847	0.022619
chrX	70671329	70672966	SVA_D:Other:Other:-	0.927157	0.908246	0.177466
chrX	71778887	71780428	SVA_B:Other:Other:+	0.812177	0.238601	0.126667
chrX	73317567	73319173	SVA_B:Other:Other:+	0.871211	0.851778	0.59636
chrX	73631802	73633213	SVA_C:Other:Other:-	0.260778	0.0272667	0.161905
chrX	73787741	73789694	SVA_D:Other:Other:-	0.157986	0.0335577	0.0371032
chrX	74553763	74556198	SVA_A:Other:Other:-	0.778386	0.767758	0.670952
chrX	77186509	77188447	SVA_D:Other:Other:-	0.717884	0.107306	0.0181973
chrX	79845908	79847758	SVA_D:Other:Other:+	0.776902	0.272043	0.663988
chrX	86287660	86289003	SVA_B:Other:Other:-	0.299707	0.155212	0.46246
chrX	99978129	99979868	SVA_D:Other:Other:+	0.647922	0.276404	0.0973085
chrX	108913829	108915321	SVA_B:Other:Other:+	0.843854	0.298681	0.083908
chrX	122867343	122868845	SVA_D:Other:Other:+	0.276936	0.0323632	0.02
chrX	125807164	125808922	SVA_C:Other:Other:+	0.69447	0.397621	0.44566
chrX	132617233	132618724	SVA_B:Other:Other:-	0.365998	0.0677705	0.0769841
chrX	133972690	133974403	SVA_D:Other:Other:+	0.787518	0.179082	0.0181818
chrX	134093737	134095193	SVA_D:Other:Other:+	0.838705	0.294742	0.0172043
chrX	137364213	137365625	SVA_B:Other:Other:-	0.57317	0.392375	0.211844
chrX	144517101	144518660	SVA_D:Other:Other:+	0.845657	0.358335	0.447985
chrX	147073174	147074915	SVA_F:Other:Other:-	0.917571	0.522372	0.289916
chrX	154451475	154452904	SVA_B:Other:Other:-	0.879252	0.795835	0.0515873
chrY	4163059	4164343	SVA_C:Other:Other:+	0.70774	0.172727	0.391174
chr10	6247937	6249389	SVA_D:Other:Other:-	0.913796	0.685523	0.180011
chr10	8910328	8911876	SVA_D:Other:Other:+	0.520772	0.107886	0.0253205
chr10	12267759	12269270	SVA_B:Other:Other:-	0.939183	0.306568	0.311802
chr10	12564195	12565789	SVA_D:Other:Other:-	0.893028	0.691248	0.587619
chr10	22125813	22127571	SVA_C:Other:Other:+	0.887429	0.858786	0.816546
chr10	29060073	29061603	SVA_B:Other:Other:+	0.200367	0.0316094	0.0913364
chr10	29984904	29986738	SVA_D:Other:Other:+	0.0987841	0.0215407	0.0465686
chr10	32521829	32523241	SVA_B:Other:Other:-	0.105477	0.0265167	0.0293333
chr10	32788530	32789968	SVA_B:Other:Other:-	0.931533	0.79486	0.543846
chr10	32794136	32795781	SVA_A:Other:Other:-	0.944077	0.930256	0.738086
chr10	34641256	34642637	SVA_B:Other:Other:+	0.757327	0.221243	0.0462727
chr10	35264856	35266229	SVA_C:Other:Other:+	0.933569	0.308812	0.305146
chr10	42632959	42634451	SVA_D:Other:Other:+	0.470779	0.441338	0.494208
chr10	43342118	43343771	SVA_D:Other:Other:+	0.506085	0.0579274	0.288244
chr10	43737943	43739850	SVA_A:Other:Other:+	0.860638	0.842471	0.472673
chr10	43824274	43826082	SVA_A:Other:Other:+	0.695911	0.341606	0.300079
chr10	43941131	43942670	SVA_B:Other:Other:-	0.952252	0.930239	0.548404
chr10	43959830	43961629	SVA_D:Other:Other:-	0.918741	0.369123	0.0988473
chr10	45754728	45756436	SVA_D:Other:Other:+	0.768452	0.0877499	0.213075
chr10	45825527	45826408	SVA_D:Other:Other:-	0.64038	0.350829	0.0969697
chr10	45886501	45888172	SVA_D:Other:Other:+	0.843649	0.834197	0.401584
chr10	46006863	46008669	SVA_D:Other:Other:+	0.858932	0.191929	0.199415
chr10	51729511	51731108	SVA_C:Other:Other:+	0.894897	0.90219	0.152587
chr10	52115033	52116342	SVA_B:Other:Other:+	0.880859	0.166246	0.112681
chr10	60003130	60004819	SVA_A:Other:Other:+	0.859131	0.538704	0.756318
chr10	61455824	61457495	SVA_D:Other:Other:+	0.200179	0.00504299	0
chr10	61503422	61504880	SVA_B:Other:Other:+	0.16707	0.0851169	0.317493
chr10	64688026	64689314	SVA_A:Other:Other:-	0.793904	0.333534	0.443452
chr10	64706812	64708849	SVA_E:Other:Other:+	0.12425	0.036717	0.436807
chr10	69450615	69452514	SVA_D:Other:Other:+	0.902779	0.876113	0.195977
chr10	72390223	72391763	SVA_D:Other:Other:+	0.399555	0.0653569	0.18403
chr10	73628415	73630264	SVA_D:Other:Other:-	0.485406	0.0628245	0.227513
chr10	73634921	73636503	SVA_D:Other:Other:-	0.815577	0.196462	0.0355638
chr10	75448716	75450383	SVA_D:Other:Other:+	0.854255	0.202563	0.0710896
chr10	77509386	77511125	SVA_B:Other:Other:-	0.171345	0.046937	0.311835
chr10	79835057	79836464	SVA_C:Other:Other:-	0.565401	0.0669142	0.2375
chr10	80227713	80229497	SVA_D:Other:Other:-	0.907151	0.875859	0.157814
chr10	81038192	81039736	SVA_B:Other:Other:-	0.95625	0.942312	0.0142857
chr10	85939635	85940905	SVA_B:Other:Other:-	0.921843	0.897739	0.234949
chr10	86106536	86108266	SVA_C:Other:Other:-	0.924592	0.68958	0
chr10	88214111	88215453	SVA_B:Other:Other:+	0.810782	0.209297	0.0911866
chr10	88839662	88841720	SVA_D:Other:Other:+	0.823028	0.283739	0.0470506
chr10	93082267	93084025	SVA_D:Other:Other:-	0.789632	0.226098	0.463216
chr10	94734301	94736426	SVA_D:Other:Other:+	0.397826	0.0278974	0.0135802
chr10	95729820	95731384	SVA_D:Other:Other:+	0.151738	0.0568783	0.0607474
chr10	99287232	99289549	SVA_D:Other:Other:-	0.900767	0.419967	0.145615
chr10	99600726	99602222	SVA_D:Other:Other:+	0.58146	0.081117	0.0850459
chr10	99911664	99913385	SVA_C:Other:Other:+	0.798072	0.327215	0.133252
chr10	101650906	101652532	SVA_F:Other:Other:+	0.813522	0.75628	0.0306471
chr10	103795136	103796643	SVA_C:Other:Other:+	0.937757	0.73609	0.0481074
chr10	105366217	105367927	SVA_D:Other:Other:+	0.918325	0.832374	0.108376
chr10	112526083	112528030	SVA_D:Other:Other:-	0.49923	0.365079	0.189312
chr10	120654425	120655939	SVA_C:Other:Other:+	0.934352	0.738764	0.587374
chr10	120940813	120942736	SVA_D:Other:Other:-	0.881476	0.442369	0.0461538
chr10	121019923	121021456	SVA_D:Other:Other:-	0.743944	0.0507093	0.0185185
chr10	121318456	121320006	SVA_C:Other:Other:-	0.719858	0.0811528	0.227111
chr10	121480897	121482606	SVA_F:Other:Other:+	0.911235	0.750504	0.0870748
chr10	121553537	121555624	SVA_D:Other:Other:-	0.905937	0.699072	0.063933
chr10	122557455	122558843	SVA_B:Other:Other:+	0.590045	0.118362	0.0143624
chr10	123962173	123963720	SVA_D:Other:Other:-	0.75357	0.253579	0.0785248
chr10	127206303	127207745	SVA_D:Other:Other:+	0.387776	0.0655201	0.33291
chr10	127658199	127659439	SVA_B:Other:Other:-	0.805067	0.268357	0.139599
chr10	128792594	128793956	SVA_B:Other:Other:-	0.918146	0.762904	0.32409
chr10	135227418	135228718	SVA_D:Other:Other:-	0.956415	0.896152	0.564205
chr11	516847	518179	SVA_A:Other:Other:+	0.923631	0.85865	0.610684
chr11	2353015	2354721	SVA_F:Other:Other:+	0.892037	0.53428	0.340976
chr11	5955218	5956465	SVA_F:Other:Other:+	0.957885	0.94319	0.502857
chr11	5981456	5982994	SVA_B:Other:Other:+	0.914136	0.44044	0.671009
chr11	8544340	8545876	SVA_B:Other:Other:+	0.869607	0.324932	0.439768
chr11	16908902	16910411	SVA_C:Other:Other:+	0.870061	0.646483	0.0398671
chr11	17071144	17073074	SVA_F:Other:Other:-	0.740323	0.18622	0.074256
chr11	18141977	18143565	SVA_D:Other:Other:+	0.623987	0.059842	0.025641
chr11	19880685	19882618	SVA_D:Other:Other:-	0.379511	0.0681884	0.0295455
chr11	20884154	20885687	SVA_C:Other:Other:-	0.336882	0.161998	0.0336111
chr11	33264634	33266139	SVA_B:Other:Other:+	0.301891	0.0745078	0
chr11	34007128	34008566	SVA_D:Other:Other:+	0.902666	0.644376	0.0943947
chr11	36165451	36167571	SVA_D:Other:Other:+	0.177003	0.0571342	0.248086
chr11	37452012	37453893	SVA_A:Other:Other:-	0.79604	0.763611	0.641534
chr11	48976397	48978072	SVA_B:Other:Other:-	0.545495	0.319179	0.406495
chr11	56264007	56265567	SVA_B:Other:Other:+	0.371292	0.0458145	0.361141
chr11	57483053	57485225	SVA_D:Other:Other:-	0.874557	0.686484	0.0226667
chr11	57710663	57712104	SVA_B:Other:Other:-	0.446541	0.0964537	0.0833333
chr11	59466491	59468034	SVA_D:Other:Other:+	0.785575	0.0486202	0.255539
chr11	59839988	59841459	SVA_C:Other:Other:-	0.882646	0.381366	0.577559
chr11	60218196	60219888	SVA_F:Other:Other:+	0.539509	0.0870686	0.0517108
chr11	60258362	60259888	SVA_C:Other:Other:+	0.57669	0.048174	0.0612877
chr11	60277086	60278658	SVA_B:Other:Other:+	0.588535	0.311235	0.34803
chr11	60581971	60583847	SVA_F:Other:Other:+	0.40225	0.0506194	0.341683
chr11	60933229	60934781	SVA_D:Other:Other:-	0.925039	0.397976	0.031746
chr11	65006065	65007793	SVA_F:Other:Other:+	0.913548	0.595271	0.00925926
chr11	65529662	65531199	SVA_D:Other:Other:-	0.784655	0.176828	0.0949295
chr11	68242382	68243927	SVA_C:Other:Other:-	0.924377	0.881649	0.0533333
chr11	68628279	68629804	SVA_D:Other:Other:+	0.849106	0.121927	0.0208551
chr11	70140656	70142847	SVA_D:Other:Other:-	0.939458	0.852618	0
chr11	71541846	71543315	SVA_C:Other:Other:+	0.579519	0.475469	0.110879
chr11	72212553	72214615	SVA_F:Other:Other:-	0.146668	0.13624	0.706379
chr11	72620084	72621885	SVA_A:Other:Other:+	0.916471	0.893025	0.79223
chr11	73282257	73283918	SVA_D:Other:Other:+	0.872023	0.819613	0.0659279
chr11	73485426	73486983	SVA_C:Other:Other:+	0.890818	0.349837	0.218311
chr11	73607342	73609277	SVA_D:Other:Other:-	0.838167	0.145098	0.0323696
chr11	73646654	73648767	SVA_D:Other:Other:-	0.825678	0.252443	0.225475
chr11	73839612	73841174	SVA_D:Other:Other:-	0.622774	0.211099	0.0960181
chr11	74038873	74040191	SVA_B:Other:Other:+	0.159928	0.0593549	0.0910476
chr11	75587893	75589957	SVA_D:Other:Other:-	0.822349	0.297447	0.0133333
chr11	76292966	76294400	SVA_C:Other:Other:-	0.286458	0.0574232	0.0174603
chr11	76644325	76645786	SVA_D:Other:Other:-	0.940044	0.857404	0.769739
chr11	77644233	77645453	SVA_B:Other:Other:+	0.780943	0.135368	0.124837
chr11	78902178	78903812	SVA_D:Other:Other:+	0.113398	0.0532035	0.195238
chr11	79210272	79211876	SVA_B:Other:Other:+	0.0599986	0.0270067	0.0267813
chr11	79515041	79516118	SVA_B:Other:Other:+	0.67404	0.320578	0.406349
chr11	81892216	81893920	SVA_D:Other:Other:+	0.950027	0.670581	0.335863
chr11	82843632	82845216	SVA_D:Other:Other:+	0.498082	0.149264	0.116377
chr11	83026661	83028894	SVA_D:Other:Other:-	0.411765	0.0281315	0.531696
chr11	85563389	85564718	SVA_C:Other:Other:+	0.911091	0.727291	0.411477
chr11	86442570	86444195	SVA_D:Other:Other:+	0.793471	0.282421	0.196603
chr11	90796048	90797650	SVA_D:Other:Other:+	0.343506	0.0394725	0.00252525
chr11	91890028	91892084	SVA_D:Other:Other:+	0.420017	0.052562	0.210822
chr11	95214942	95216586	SVA_D:Other:Other:+	0.836285	0.105128	0.548329
chr11	107782496	107784211	SVA_D:Other:Other:+	0.214249	0.0831186	0.0428819
chr11	111897051	111898675	SVA_D:Other:Other:-	0.882596	0.40805	0.109244
chr11	113394356	113395538	SVA_A:Other:Other:+	0.394528	0.101565	0.434895
chr11	116217094	116218784	SVA_C:Other:Other:+	0.449774	0.0940532	0.179814
chr11	118861702	118863268	SVA_B:Other:Other:-	0.891171	0.164846	0.0477778
chr11	118929328	118930669	SVA_C:Other:Other:-	0.916474	0.669594	0.122789
chr11	124272728	124274050	SVA_C:Other:Other:-	0.386231	0.0401892	0.254329
chr11	129717302	129718401	SVA_D:Other:Other:-	0.910514	0.575349	0
chr12	1926627	1927951	SVA_D:Other:Other:+	0.877899	0.465496	0.102857
chr12	7741774	7743805	SVA_D:Other:Other:-	0.389182	0.0452817	0.189469
chr12	8335971	8337964	SVA_D:Other:Other:+	0.640313	0.0551461	0.108838
chr12	12718330	12719858	SVA_D:Other:Other:+	0.812284	0.0898574	0.154053
chr12	12770602	12772018	SVA_B:Other:Other:-	0.817649	0.612557	0.0723104
chr12	14506970	14508474	SVA_C:Other:Other:+	0.927068	0.937993	0.701784
chr12	25078501	25079902	SVA_C:Other:Other:+	0.933554	0.603239	0.309702
chr12	28026232	28027801	SVA_D:Other:Other:+	0.832893	0.195374	0.064599
chr12	28353234	28354936	SVA_D:Other:Other:-	0.925099	0.901109	0.47554
chr12	32715348	32716995	SVA_D:Other:Other:-	0.889278	0.399581	0.0215686
chr12	38723544	38725116	SVA_C:Other:Other:-	0.865216	0.626354	0.148783
chr12	40746271	40747834	SVA_C:Other:Other:-	0.836128	0.555718	0.451537
chr12	44078141	44080137	SVA_D:Other:Other:+	0.455461	0.044683	0.483853
chr12	46393389	46394911	SVA_A:Other:Other:+	0.92429	0.782119	0.652329
chr12	48893514	48895337	SVA_D:Other:Other:-	0.445724	0.0524611	0.527062
chr12	48913595	48915195	SVA_C:Other:Other:-	0.746552	0.203035	0.448182
chr12	48944995	48946287	SVA_C:Other:Other:+	0.887022	0.902654	0.620178
chr12	49117809	49119365	SVA_D:Other:Other:+	0.921029	0.713359	0.0833333
chr12	49235221	49237100	SVA_D:Other:Other:+	0.900944	0.888731	0.0464646
chr12	49308893	49310439	SVA_D:Other:Other:-	0.940631	0.7	0.1
chr12	50253991	50255763	SVA_D:Other:Other:+	0.652516	0.0578786	0.142167
chr12	52802821	52804486	SVA_D:Other:Other:+	0.354774	0.0728294	0.356143
chr12	54881264	54883083	SVA_D:Other:Other:-	0.498975	0.0997462	0.00769231
chr12	57182240	57184386	SVA_D:Other:Other:-	0.612517	0.0602397	0.0350694
chr12	57272535	57274017	SVA_B:Other:Other:+	0.601503	0.670129	0.633333
chr12	57888289	57889814	SVA_B:Other:Other:-	0.914642	0.772782	0.0550926
chr12	57900633	57902496	SVA_D:Other:Other:-	0.955749	0.710634	0.155758
chr12	58058224	58060126	SVA_A:Other:Other:+	0.914248	0.955885	0.624075
chr12	62403916	62405545	SVA_A:Other:Other:+	0.161072	0.0478439	0.598093
chr12	64079903	64081381	SVA_D:Other:Other:+	0.22727	0.113409	0.10711
chr12	66568197	66569511	SVA_A:Other:Other:+	0.749871	0.315425	0.445322
chr12	69768195	69769694	SVA_B:Other:Other:-	0.931101	0.707753	0.698457
chr12	70152771	70154216	SVA_C:Other:Other:-	0.961704	0.919174	0.911012
chr12	70246366	70248114	SVA_B:Other:Other:-	0.126347	0.0330483	0.661964
chr12	74981310	74982761	SVA_B:Other:Other:-	0.0808268	0.0231682	0.0281955
chr12	80700600	80702792	SVA_D:Other:Other:-	0.805206	0.306539	0.0272727
chr12	89896855	89898398	SVA_C:Other:Other:+	0.785734	0.0815815	0.126953
chr12	90804377	90805715	SVA_B:Other:Other:+	0.60645	0.127927	0.00588235
chr12	95628462	95630244	SVA_D:Other:Other:-	0.860113	0.242586	0.0603175
chr12	96300623	96302230	SVA_D:Other:Other:-	0.462642	0.0625	0
chr12	109049127	109050841	SVA_C:Other:Other:+	0.919894	0.770245	0.0238706
chr12	110610147	110611786	SVA_D:Other:Other:+	0.453325	0.12214	0.045084
chr12	111387779	111389652	SVA_D:Other:Other:-	0.127264	0.0189933	0.30481
chr12	111944433	111945974	SVA_D:Other:Other:+	0.934713	0.867178	0.119195
chr12	112394298	112396094	SVA_B:Other:Other:+	0.932238	0.583866	0.349709
chr12	114922061	114923434	SVA_B:Other:Other:-	0.0626867	0.0177953	0.335017
chr12	118168276	118169856	SVA_B:Other:Other:+	0.770953	0.0861833	0.112596
chr12	119797341	119798997	SVA_D:Other:Other:-	0.703915	0.262076	0.392969
chr12	120715293	120716864	SVA_A:Other:Other:-	0.92103	0.267745	0.165533
chr12	121169462	121171069	SVA_C:Other:Other:-	0.935043	0.539967	0.0755473
chr12	121513114	121515417	SVA_D:Other:Other:+	0.197007	0.0598769	0.526491
chr12	122071618	122072660	SVA_D:Other:Other:-	0.931738	0.950705	0
chr12	122430911	122432883	SVA_F:Other:Other:+	0.331031	0.143167	0.0579976
chr12	123856249	123857401	SVA_A:Other:Other:+	0.937143	0.798693	0.0922399
chr12	124585705	124587547	SVA_D:Other:Other:-	0.864838	0.68324	0.0708333
chr12	132410289	132411662	SVA_D:Other:Other:-	0.529427	0.167101	0.0333333
chr13	33815700	33816900	SVA_B:Other:Other:+	0.449306	0.144299	0.575188
chr13	19247425	19248904	SVA_D:Other:Other:+	0.303865	0.081799	0.0644444
chr13	21759853	21761595	SVA_F:Other:Other:-	0.621316	0.0485898	0.11391
chr13	23432548	23434034	SVA_D:Other:Other:-	0.796153	0.245169	0.398152
chr13	25543830	25545367	SVA_D:Other:Other:-	0.126154	0.0934227	0.180247
chr13	26086028	26088146	SVA_D:Other:Other:-	0.625843	0.225072	0.39596
chr13	27297269	27298964	SVA_D:Other:Other:+	0.126053	0.0357841	0.0378571
chr13	32573589	32575276	SVA_D:Other:Other:+	0.492816	0.188827	0.123274
chr13	33289761	33291843	SVA_D:Other:Other:+	0.953225	0.865817	0.774883
chr13	33294785	33296515	SVA_B:Other:Other:-	0.775857	0.717702	0.225027
chr13	36540612	36541975	SVA_B:Other:Other:+	0.769872	0.343419	0.48124
chr13	41528556	41530730	SVA_D:Other:Other:+	0.83825	0.492066	0.124542
chr13	42145533	42146946	SVA_B:Other:Other:+	0.456253	0.0341744	0.0318948
chr13	43989382	43991363	SVA_B:Other:Other:-	0.795612	0.630984	0.750752
chr13	45255921	45257586	SVA_D:Other:Other:-	0.341983	0.0530564	0.426488
chr13	46736399	46737787	SVA_C:Other:Other:+	0.169911	0.0406539	0.0726274
chr13	50139127	50140405	SVA_C:Other:Other:+	0.88636	0.630861	0.289995
chr13	50335337	50337010	SVA_C:Other:Other:+	0.91752	0.803682	0.129912
chr13	51651255	51653059	SVA_D:Other:Other:+	0.93259	0.893557	0.539228
chr13	52637164	52639276	SVA_D:Other:Other:+	0.897557	0.473659	0.277733
chr13	52653456	52655042	SVA_D:Other:Other:+	0.879416	0.404504	0.0460631
chr13	53391595	53392987	SVA_B:Other:Other:+	0.256712	0.00810898	0.314063
chr13	76868798	76869959	SVA_B:Other:Other:+	0.060953	0.0020202	0.11875
chr13	85914261	85915690	SVA_B:Other:Other:-	0.228311	0.138861	0.446032
chr13	88213316	88214683	SVA_B:Other:Other:+	0.0489363	0.0258508	0.24888
chr13	88627862	88629770	SVA_D:Other:Other:-	0.246061	0.0130182	0.309176
chr13	96342238	96344368	SVA_D:Other:Other:-	0.894624	0.641713	0.580714
chr13	96497436	96498704	SVA_B:Other:Other:-	0.878908	0.406033	0.264855
chr13	96579924	96581453	SVA_B:Other:Other:-	0.895027	0.737979	0.321622
chr13	98426696	98427764	SVA_A:Other:Other:+	0.172597	0.0413733	0.217143
chr13	108434370	108436230	SVA_D:Other:Other:+	0.90266	0.499675	0.0125
chr13	109963225	109964745	SVA_B:Other:Other:+	0.438525	0.130299	0.554808
chr13	111258022	111259669	SVA_D:Other:Other:-	0.843451	0.0422275	0.133146
chr13	113332228	113333407	SVA_B:Other:Other:-	0.881458	0.0632132	0.0221778
chr14	77200342	77201857	SVA_D:Other:Other:-	0.925329	0.478438	0.225463
chr14	20333870	20335441	SVA_B:Other:Other:+	0.276057	0.0269488	0.404848
chr14	20777468	20779452	SVA_D:Other:Other:+	0.83973	0.735336	0.069697
chr14	21656417	21657641	SVA_D:Other:Other:+	0.508925	0.0681315	0.0271605
chr14	22165536	22166816	SVA_B:Other:Other:+	0.663697	0.0717601	0.0107143
chr14	23700817	23702630	SVA_C:Other:Other:+	0.225511	0.169462	0.378752
chr14	24205514	24206771	SVA_B:Other:Other:+	0.657188	0.101202	0.114169
chr14	24366901	24368471	SVA_B:Other:Other:-	0.755826	0.139419	0.432884
chr14	34452995	34454300	SVA_B:Other:Other:-	0.596698	0.0745902	0.423257
chr14	34880472	34882041	SVA_D:Other:Other:+	0.267001	0.0224694	0.296828
chr14	34944632	34946133	SVA_B:Other:Other:+	0.209405	0.0565563	0.0147059
chr14	36293177	36294838	SVA_D:Other:Other:-	0.179278	0.0144123	0.17
chr14	38023856	38025731	SVA_D:Other:Other:-	0.768733	0.124999	0.550119
chr14	39753954	39755668	SVA_C:Other:Other:-	0.874639	0.86885	0.214038
chr14	45069991	45071432	SVA_C:Other:Other:+	0.414476	0.147661	0.49053
chr14	46103691	46105658	SVA_B:Other:Other:+	0.737935	0.228384	0.654588
chr14	50287337	50289001	SVA_D:Other:Other:+	0.926424	0.920939	0.136905
chr14	51933686	51935057	SVA_B:Other:Other:-	0.0597925	0.0113034	0.0166667
chr14	59525014	59526436	SVA_D:Other:Other:-	0.810858	0.151546	0.0435897
chr14	63631518	63633556	SVA_D:Other:Other:+	0.373785	0.217804	0.570265
chr14	64503851	64505606	SVA_D:Other:Other:-	0.904627	0.612217	0.121474
chr14	66099699	66101298	SVA_D:Other:Other:+	0.863071	0.168794	0.59499
chr14	66158341	66160279	SVA_D:Other:Other:-	0.907031	0.445311	0.263896
chr14	67011299	67013541	SVA_D:Other:Other:-	0.871978	0.59133	0.385805
chr14	67807385	67808898	SVA_D:Other:Other:+	0.921896	0.815459	0.0530021
chr14	70369315	70370636	SVA_C:Other:Other:+	0.756612	0.312089	0.315513
chr14	70943656	70945245	SVA_C:Other:Other:+	0.940244	0.915009	0.684295
chr14	71843281	71844742	SVA_B:Other:Other:-	0.912789	0.639935	0.426761
chr14	76390632	76392402	SVA_D:Other:Other:-	0.801853	0.34355	0.125037
chr14	77363785	77365271	SVA_B:Other:Other:-	0.384265	0.0389184	0.21067
chr14	78213288	78214757	SVA_B:Other:Other:+	0.894839	0.812367	0.0587302
chr14	78459365	78460902	SVA_D:Other:Other:-	0.492987	0.0945352	0.222917
chr14	80752364	80753977	SVA_D:Other:Other:+	0.784422	0.214061	0.472454
chr14	81710234	81711634	SVA_B:Other:Other:-	0.866714	0.80299	0.278624
chr14	81928234	81929483	SVA_B:Other:Other:-	0.0893632	0.023794	0.0142857
chr14	83279997	83281667	SVA_D:Other:Other:-	0.149428	0.0252677	0.185931
chr14	85818381	85819870	SVA_D:Other:Other:-	0.548645	0.0643968	0.564728
chr14	86295503	86297031	SVA_D:Other:Other:-	0.336752	0.0369522	0.0825397
chr14	89971591	89973486	SVA_D:Other:Other:+	0.846467	0.343107	0.141939
chr14	92022874	92024752	SVA_D:Other:Other:-	0.830356	0.185526	0.475453
chr14	93377079	93379075	SVA_F:Other:Other:-	0.0306986	0.00657895	0.267937
chr14	100646600	100648282	SVA_D:Other:Other:+	0.793694	0.0799596	0.036525
chr14	100810398	100812012	SVA_D:Other:Other:+	0.881558	0.800432	0.113598
chr14	105544937	105546382	SVA_F:Other:Other:-	0.842069	0.20952	0.0964912
chr15	29094105	29095843	SVA_D:Other:Other:-	0.895988	0.305352	0.320547
chr15	31476142	31477630	SVA_B:Other:Other:+	0.0878433	0.0440046	0.230681
chr15	41612454	41614115	SVA_D:Other:Other:+	0.946497	0.939746	0.00909091
chr15	43296542	43298302	SVA_B:Other:Other:+	0.90867	0.481532	0.0552646
chr15	43306051	43307851	SVA_D:Other:Other:+	0.932194	0.70718	0.0997829
chr15	43368193	43369857	SVA_E:Other:Other:+	0.244639	0.0938548	0.114414
chr15	43458752	43460315	SVA_D:Other:Other:-	0.917719	0.177171	0.26058
chr15	45584609	45586200	SVA_D:Other:Other:-	0.728024	0.136688	0.196169
chr15	46389636	46391015	SVA_B:Other:Other:-	0.618213	0.159092	0.417766
chr15	49841523	49843453	SVA_D:Other:Other:-	0.95927	0.699952	0.623219
chr15	50449924	50451308	SVA_D:Other:Other:+	0.892993	0.312396	0.401032
chr15	50464333	50465917	SVA_B:Other:Other:+	0.827677	0.126866	0.376192
chr15	52177486	52178904	SVA_B:Other:Other:-	0.889971	0.227542	0.13574
chr15	52577644	52579153	SVA_D:Other:Other:+	0.800635	0.205385	0.0902898
chr15	52751358	52752877	SVA_B:Other:Other:-	0.0921156	0.0583945	0.0735821
chr15	55073011	55074342	SVA_B:Other:Other:-	0.714669	0.428628	0.763377
chr15	56832341	56833618	SVA_A:Other:Other:+	0.459251	0.061796	0.341796
chr15	61238432	61239907	SVA_C:Other:Other:+	0.740578	0.192846	0.0964594
chr15	62623773	62625548	SVA_D:Other:Other:-	0.495259	0.0509908	0.0556713
chr15	63390454	63391984	SVA_D:Other:Other:+	0.86736	0.451478	0.190873
chr15	65090617	65092291	SVA_D:Other:Other:-	0.90341	0.188949	0
chr15	68513548	68515479	SVA_A:Other:Other:+	0.902653	0.880953	0.607533
chr15	69256014	69257899	SVA_D:Other:Other:-	0.821022	0.47854	0.460187
chr15	71163291	71164789	SVA_B:Other:Other:-	0.23563	0.0666485	0.166634
chr15	72688142	72689984	SVA_D:Other:Other:+	0.282488	0.0742994	0.294631
chr15	73098685	73100461	SVA_D:Other:Other:-	0.63157	0.141438	0.169643
chr15	75020586	75022177	SVA_D:Other:Other:+	0.19309	0.124257	0.0596296
chr15	75850839	75852129	SVA_C:Other:Other:+	0.931919	0.844391	0.0443798
chr15	77191490	77192696	SVA_A:Other:Other:+	0.939719	0.905753	0.181551
chr15	84489997	84491992	SVA_D:Other:Other:-	0.921008	0.654334	0.157143
chr15	89066640	89068195	SVA_B:Other:Other:+	0.609447	0.754368	0.664377
chr15	101313768	101315222	SVA_D:Other:Other:-	0.615861	0.0925031	0.361667
chr16	2449311	2450819	SVA_D:Other:Other:-	0.752714	0.254067	0.0240575
chr16	2851337	2852861	SVA_F:Other:Other:-	0.887302	0.41324	0.0207729
chr16	8164385	8165934	SVA_D:Other:Other:+	0.427476	0.100879	0.0363095
chr16	8826074	8827671	SVA_F:Other:Other:-	0.530379	0.160859	0.197279
chr16	9075314	9076581	SVA_C:Other:Other:+	0.56957	0.0362281	0.0732304
chr16	13982908	13984068	SVA_B:Other:Other:+	0.600344	0.118794	0.366319
chr16	14626032	14627262	SVA_D:Other:Other:-	0.328849	0.0215289	0.00833333
chr16	16712251	16713742	SVA_B:Other:Other:-	0.321142	0.208775	0.269048
chr16	17598871	17600721	SVA_D:Other:Other:-	0.570276	0.121714	0.459968
chr16	18745056	18746589	SVA_B:Other:Other:+	0.426739	0.0881575	0.325805
chr16	23594104	23595595	SVA_C:Other:Other:+	0.892486	0.837554	0.0785193
chr16	24119670	24121462	SVA_F:Other:Other:-	0.347321	0.0173782	0.0949018
chr16	28388029	28389477	SVA_B:Other:Other:+	0.926323	0.918957	0.0431373
chr16	28676780	28678371	SVA_D:Other:Other:-	0.839401	0.657964	0.0147392
chr16	29070841	29072393	SVA_D:Other:Other:-	0.829305	0.623744	0.0401786
chr16	46686572	46688087	SVA_D:Other:Other:-	0.742313	0.280449	0.165476
chr16	47033358	47035202	SVA_D:Other:Other:+	0.616259	0.0437822	0.269525
chr16	47214263	47216109	SVA_D:Other:Other:+	0.850209	0.518053	0.559699
chr16	48450093	48451457	SVA_B:Other:Other:-	0.527754	0.109522	0.272315
chr16	48516347	48517791	SVA_B:Other:Other:-	0.144732	0.0224228	0.35034
chr16	48984995	48986665	SVA_F:Other:Other:+	0.0404794	0.0188696	0.0752698
chr16	49243567	49245165	SVA_D:Other:Other:-	0.43505	0.062742	0.0346955
chr16	53572452	53574158	SVA_D:Other:Other:+	0.709744	0.125104	0.191615
chr16	53658692	53660070	SVA_B:Other:Other:+	0.794721	0.166114	0.0659155
chr16	53731234	53733318	SVA_D:Other:Other:+	0.924917	0.854367	0.564912
chr16	57233820	57235903	SVA_D:Other:Other:-	0.744328	0.56994	0.130357
chr16	58879421	58880991	SVA_D:Other:Other:-	0.90537	0.753755	0.0770975
chr16	66548018	66549085	SVA_B:Other:Other:+	0.968621	0.971845	0.0154762
chr16	66664208	66665833	SVA_D:Other:Other:+	0.926027	0.790265	0.120345
chr16	68196652	68198333	SVA_D:Other:Other:-	0.893046	0.657287	0.318611
chr16	71622713	71624168	SVA_D:Other:Other:+	0.905925	0.523682	0.00884354
chr16	87751947	87753288	SVA_B:Other:Other:+	0.926855	0.894477	0.0834357
chr16	89528451	89530101	SVA_D:Other:Other:+	0.8979	0.879341	0.0424358
chr17	9960074	9961585	SVA_C:Other:Other:+	0.96165	0.939733	0.0416126
chr17	474750	476282	SVA_D:Other:Other:+	0.921421	0.836576	0.0390888
chr17	501189	503014	SVA_D:Other:Other:+	0.858413	0.91779	0.205553
chr17	1149817	1151244	SVA_D:Other:Other:-	0.864905	0.27383	0.00416667
chr17	1305936	1307355	SVA_D:Other:Other:-	0.966555	0.845022	0.0395833
chr17	1591891	1593961	SVA_F:Other:Other:-	0.542217	0.0498365	0.213033
chr17	3015148	3016938	SVA_D:Other:Other:-	0.486278	0.0789094	0.411387
chr17	3367298	3369090	SVA_D:Other:Other:+	0.836977	0.381287	0
chr17	3466972	3468357	SVA_D:Other:Other:-	0.862498	0.279661	0
chr17	3756900	3758383	SVA_D:Other:Other:+	0.625484	0.179003	0.0111111
chr17	6128947	6130411	SVA_D:Other:Other:+	0.325934	0.0550595	0.0743229
chr17	8276458	8277959	SVA_B:Other:Other:+	0.420396	0.0245822	0.0457451
chr17	8453040	8454476	SVA_F:Other:Other:+	0.956872	0.811507	0.0493254
chr17	15770109	15771695	SVA_D:Other:Other:+	0.949267	0.668635	0.27248
chr17	15997859	15999635	SVA_D:Other:Other:+	0.872974	0.252345	0.0854342
chr17	16048193	16049620	SVA_B:Other:Other:+	0.878811	0.348324	0.132642
chr17	16214772	16216271	SVA_C:Other:Other:-	0.35493	0.0145912	0.0525595
chr17	17814965	17816540	SVA_D:Other:Other:-	0.931065	0.588327	0.047805
chr17	18240857	18242380	SVA_C:Other:Other:+	0.944432	0.863669	0.0826389
chr17	19344105	19345737	SVA_D:Other:Other:+	0.451111	0.0672685	0.0761549
chr17	19378635	19380027	SVA_D:Other:Other:+	0.248186	0.0325652	0.068086
chr17	19588125	19589107	SVA_A:Other:Other:+	0.789908	0.754778	0.35907
chr17	19853611	19855219	SVA_B:Other:Other:+	0.861193	0.218157	0.140912
chr17	20460236	20461343	SVA_B:Other:Other:+	0.698979	0.431472	0.0585498
chr17	20587727	20589414	SVA_D:Other:Other:+	0.770413	0.0553571	0.192929
chr17	22239807	22241531	SVA_D:Other:Other:+	0.704056	0.581784	0.653316
chr17	25360185	25361870	SVA_F:Other:Other:+	0.747464	0.800307	0.564075
chr17	26785168	26786776	SVA_D:Other:Other:+	0.679564	0.0306259	0.152499
chr17	26930494	26932324	SVA_D:Other:Other:-	0.920245	0.68912	0.0123457
chr17	27859373	27860875	SVA_D:Other:Other:-	0.942952	0.812725	0.0963367
chr17	28849852	28851242	SVA_D:Other:Other:+	0.637199	0.219013	0.0626932
chr17	33521496	33523031	SVA_C:Other:Other:-	0.389009	0.197316	0.189295
chr17	37086258	37087994	SVA_D:Other:Other:-	0.280661	0.144551	0.033179
chr17	37489426	37490741	SVA_B:Other:Other:+	0.967513	0.78825	0.0138219
chr17	37493198	37494788	SVA_D:Other:Other:+	0.929258	0.904986	0.0874609
chr17	40031659	40033178	SVA_D:Other:Other:+	0.886109	0.843166	0.104082
chr17	40600471	40602063	SVA_D:Other:Other:+	0.921765	0.878664	0.0411765
chr17	41124315	41126028	SVA_F:Other:Other:+	0.940521	0.674226	0.025463
chr17	42601351	42603122	SVA_D:Other:Other:+	0.878876	0.34337	0.0189394
chr17	45497281	45499010	SVA_D:Other:Other:+	0.769063	0.195814	0.0923077
chr17	47496177	47497847	SVA_A:Other:Other:-	0.939605	0.92009	0.634979
chr17	56219155	56220882	SVA_D:Other:Other:+	0.298843	0.0709505	0.450471
chr17	57576808	57578526	SVA_D:Other:Other:+	0.156156	0.084862	0.142509
chr17	61533164	61535051	SVA_D:Other:Other:+	0.853431	0.137112	0.069141
chr17	62712107	62713487	SVA_D:Other:Other:+	0.318453	0.11002	0.175674
chr17	63479893	63481370	SVA_D:Other:Other:+	0.584136	0.102067	0.241699
chr17	63832914	63834224	SVA_B:Other:Other:+	0.920811	0.723802	0.605419
chr17	67191700	67193146	SVA_B:Other:Other:-	0.532348	0.0276875	0.411114
chr17	76461028	76462541	SVA_F:Other:Other:+	0.903608	0.822264	0.0874761
chr17	78510656	78511880	SVA_D:Other:Other:-	0.876715	0.173479	0.0333333
chr17	79584689	79586244	SVA_D:Other:Other:+	0.945246	0.90889	0.190061
chr17	80411076	80412333	SVA_A:Other:Other:-	0.953079	0.944702	0.279806
chr18	2867370	2868789	SVA_D:Other:Other:-	0.929312	0.546934	0.17521
chr18	6826685	6828405	SVA_D:Other:Other:-	0.632127	0.118917	0.106811
chr18	7097821	7099486	SVA_D:Other:Other:+	0.902993	0.198607	0.160194
chr18	10505430	10507404	SVA_B:Other:Other:-	0.8379	0.907329	0.721296
chr18	11344027	11345456	SVA_B:Other:Other:+	0.901977	0.931138	0.572552
chr18	11959017	11960661	SVA_D:Other:Other:+	0.548004	0.0697388	0.056282
chr18	12242895	12244175	SVA_A:Other:Other:+	0.434036	0.183218	0.267455
chr18	12873244	12875325	SVA_D:Other:Other:+	0.895618	0.847945	0.0222222
chr18	13097648	13099213	SVA_D:Other:Other:-	0.925757	0.83977	0.204722
chr18	14009955	14011906	SVA_D:Other:Other:-	0.807022	0.590529	0.494134
chr18	18716991	18718480	SVA_A:Other:Other:-	0.952808	0.601834	0.62881
chr18	19171627	19173550	SVA_D:Other:Other:-	0.824268	0.123481	0.231621
chr18	30727332	30728444	SVA_B:Other:Other:-	0.697437	0.122919	0.0818122
chr18	33656880	33658670	SVA_D:Other:Other:-	0.928325	0.275682	0.341412
chr18	45353823	45355319	SVA_B:Other:Other:+	0.797806	0.320686	0.0796594
chr18	46605773	46607924	SVA_D:Other:Other:-	0.31922	0.116538	0.217262
chr18	47103384	47105371	SVA_F:Other:Other:-	0.294444	0.214286	0.19329
chr18	47325579	47327279	SVA_D:Other:Other:+	0.859128	0.622537	0.184921
chr18	47943254	47944827	SVA_A:Other:Other:-	0.894962	0.710625	0.64353
chr18	48642923	48644482	SVA_B:Other:Other:-	0.958174	0.970779	0.735348
chr18	55299331	55301135	SVA_D:Other:Other:-	0.941066	0.917419	0.138842
chr18	56922186	56923676	SVA_B:Other:Other:+	0.163928	0.153662	0.412302
chr18	68236252	68237572	SVA_C:Other:Other:-	0.659085	0.120061	0.201317
chr18	74356852	74358427	SVA_D:Other:Other:+	0.89152	0.320312	0.11673
chr18	74739968	74741416	SVA_D:Other:Other:-	0.855268	0.334895	0.330556
chr18	76832148	76833684	SVA_B:Other:Other:-	0.91997	0.715461	0.623562
chr19	21625783	21627216	SVA_B:Other:Other:-	0.78933	0.045475	0.0161483
chr19	5701310	5703042	SVA_D:Other:Other:+	0.927319	0.90668	0.0452991
chr19	6354798	6356476	SVA_D:Other:Other:+	0.936247	0.853234	0.0225942
chr19	8849095	8851087	SVA_D:Other:Other:+	0.0669711	0.0320792	0.250828
chr19	9593346	9594983	SVA_C:Other:Other:+	0.864431	0.837622	0.757371
chr19	9789996	9791610	SVA_D:Other:Other:+	0.717749	0.785032	0.170719
chr19	11386800	11388209	SVA_B:Other:Other:-	0.666494	0.0763647	0.0550044
chr19	11787077	11788703	SVA_B:Other:Other:-	0.848763	0.391913	0.254448
chr19	12577935	12579524	SVA_D:Other:Other:+	0.89169	0.263743	0.0233516
chr19	18028420	18030317	SVA_D:Other:Other:+	0.87296	0.339394	0.0133668
chr19	18115825	18117465	SVA_D:Other:Other:-	0.809892	0.303539	0.0285714
chr19	19880272	19881642	SVA_B:Other:Other:+	0.231089	0.0525365	0.0239669
chr19	20248109	20249434	SVA_D:Other:Other:+	0.815858	0.336764	0.0292743
chr19	20286140	20287623	SVA_D:Other:Other:-	0.831189	0.640528	0
chr19	20324673	20326120	SVA_D:Other:Other:+	0.806299	0.161243	0.045786
chr19	20406576	20408040	SVA_D:Other:Other:+	0.726518	0.0139942	0.0753968
chr19	21134856	21136276	SVA_C:Other:Other:-	0.917975	0.731125	0.0516865
chr19	21669126	21670491	SVA_D:Other:Other:-	0.932093	0.498482	0.0078125
chr19	21693377	21694910	SVA_D:Other:Other:-	0.96212	0.937549	0.156009
chr19	21797121	21798338	SVA_B:Other:Other:+	0.768943	0.19269	0.010101
chr19	21890128	21891511	SVA_C:Other:Other:+	0.800363	0.0936381	0.0844444
chr19	21957961	21959468	SVA_D:Other:Other:+	0.778249	0.0923153	0
chr19	22503877	22505247	SVA_B:Other:Other:-	0.915095	0.477905	0.102183
chr19	22882602	22884139	SVA_C:Other:Other:-	0.748462	0.101605	0.092597
chr19	23053677	23055249	SVA_D:Other:Other:-	0.146514	0.0347928	0.17733
chr19	23343032	23344614	SVA_B:Other:Other:-	0.74306	0.675261	0.198506
chr19	23355340	23356836	SVA_D:Other:Other:+	0.677244	0.75923	0.0237025
chr19	23472169	23473651	SVA_B:Other:Other:-	0.0670729	0.0316886	0.199794
chr19	23601419	23603055	SVA_C:Other:Other:+	0.778685	0.12853	0.304494
chr19	23715638	23717190	SVA_C:Other:Other:-	0.641828	0.572105	0.057604
chr19	24146229	24147935	SVA_C:Other:Other:+	0.575638	0.15156	0.403608
chr19	34622818	34624603	SVA_D:Other:Other:+	0.76265	0.147443	0.0867586
chr19	35412334	35413909	SVA_D:Other:Other:-	0.850685	0.179082	0.213657
chr19	36559266	36560956	SVA_C:Other:Other:-	0.886593	0.571969	0.0340136
chr19	36981364	36983060	SVA_D:Other:Other:+	0.320634	0.0767509	0.00937951
chr19	39345610	39347374	SVA_D:Other:Other:-	0.764782	0.115929	0.0971306
chr19	43113817	43115463	SVA_D:Other:Other:-	0.829822	0.174023	0.126689
chr19	43142979	43144727	SVA_C:Other:Other:-	0.47884	0.0968849	0.221772
chr19	44707447	44708984	SVA_B:Other:Other:+	0.518361	0.0200022	0.180056
chr19	44992353	44993844	SVA_D:Other:Other:+	0.799697	0.479348	0.116162
chr19	47512358	47513887	SVA_D:Other:Other:+	0.910831	0.350162	0.0633333
chr19	50588970	50590603	SVA_D:Other:Other:+	0.285214	0.0226878	0.2574
chr19	50643656	50645130	SVA_D:Other:Other:+	0.467785	0.153882	0.083455
chr19	50893832	50894977	SVA_B:Other:Other:-	0.937184	0.451164	0.067037
chr19	53179314	53180396	SVA_D:Other:Other:+	0.919754	0.607881	0.233163
chr19	53223022	53224976	SVA_A:Other:Other:-	0.947773	0.939573	0.618525
chr19	53725484	53726902	SVA_D:Other:Other:+	0.888196	0.455237	0.133069
chr19	53772638	53773916	SVA_D:Other:Other:-	0.537244	0.129941	0.108571
chr19	58657884	58659777	SVA_D:Other:Other:+	0.778257	0.687336	0.389211
chr19	58915599	58917753	SVA_D:Other:Other:-	0.88711	0.803372	0.0717391
chr20	30014069	30016242	SVA_D:Other:Other:+	0.364083	0.0818543	0.0692641
chr20	4012513	4014746	SVA_E:Other:Other:+	0.26089	0.166329	0.19011
chr20	5432972	5434810	SVA_A:Other:Other:+	0.127206	0.0420516	0.51303
chr20	5619322	5620702	SVA_C:Other:Other:-	0.498029	0.199586	0.602257
chr20	5681973	5683380	SVA_D:Other:Other:+	0.480853	0.174224	0.229046
chr20	9365446	9366935	SVA_A:Other:Other:-	0.921571	0.914861	0.708382
chr20	11493470	11494864	SVA_C:Other:Other:-	0.924645	0.265536	0.202866
chr20	17759195	17760526	SVA_C:Other:Other:+	0.309923	0.0495651	0.0574561
chr20	18174523	18176033	SVA_D:Other:Other:+	0.692116	0.131238	0.164455
chr20	19658352	19660203	SVA_D:Other:Other:-	0.908882	0.448653	0
chr20	25292804	25294214	SVA_C:Other:Other:+	0.899519	0.903792	0.142645
chr20	25541652	25543426	SVA_D:Other:Other:+	0.955298	0.791252	0.228005
chr20	29525676	29527377	SVA_D:Other:Other:-	0.809522	0.431533	0.0315789
chr20	30709006	30711015	SVA_D:Other:Other:-	0.865274	0.637725	0.31602
chr20	31702734	31704267	SVA_D:Other:Other:+	0.643518	0.0775107	0.124684
chr20	31772337	31774052	SVA_D:Other:Other:-	0.824565	0.0944784	0.110007
chr20	32123476	32125339	SVA_D:Other:Other:-	0.852749	0.301746	0.141715
chr20	32286283	32288520	SVA_D:Other:Other:+	0.830795	0.616997	0.0557705
chr20	32288543	32290140	SVA_D:Other:Other:+	0.956523	0.804398	0.0903744
chr20	32719618	32721485	SVA_D:Other:Other:+	0.455611	0.0250954	0.0406325
chr20	33061968	33063510	SVA_D:Other:Other:-	0.953848	0.923184	0.0208333
chr20	33245755	33247872	SVA_D:Other:Other:+	0.938816	0.842934	0.0866583
chr20	34588675	34590368	SVA_D:Other:Other:-	0.814415	0.100525	0.274208
chr20	35640258	35642008	SVA_D:Other:Other:+	0.913316	0.61602	0.0148148
chr20	35697235	35698894	SVA_F:Other:Other:+	0.937498	0.826482	0.0739648
chr20	37006831	37008588	SVA_D:Other:Other:+	0.2596	0.0774286	0.0560896
chr20	37035520	37036997	SVA_B:Other:Other:+	0.580313	0.0638936	0.0111111
chr20	37089307	37091248	SVA_D:Other:Other:-	0.197201	0.119207	0
chr20	40183047	40184934	SVA_D:Other:Other:-	0.638161	0.055043	0.284921
chr20	41966499	41967687	SVA_B:Other:Other:-	0.0506326	0.00363517	0.231951
chr20	42235231	42236836	SVA_D:Other:Other:-	0.915811	0.800236	0.135397
chr20	44273658	44275470	SVA_D:Other:Other:-	0.765983	0.163273	0.417676
chr20	46153676	46155552	SVA_D:Other:Other:-	0.94438	0.930229	0.189594
chr20	48537952	48539655	SVA_D:Other:Other:+	0.834806	0.250624	0.1599
chr20	52470320	52471770	SVA_D:Other:Other:+	0.881778	0.149913	0.0706349
chr21	18663825	18665426	SVA_F:Other:Other:-	0.792115	0.645119	0.69826
chr21	27067287	27068746	SVA_C:Other:Other:-	0.557582	0.0376335	0
chr21	29935492	29937127	SVA_D:Other:Other:+	0.898381	0.873335	0.295313
chr21	30382963	30385103	SVA_D:Other:Other:+	0.891255	0.335913	0.0957734
chr21	37764222	37765552	SVA_B:Other:Other:-	0.92651	0.519941	0.183503
chr21	45241495	45242927	SVA_B:Other:Other:+	0.961919	0.48883	0.0586332
chr21	45316837	45318036	SVA_A:Other:Other:-	0.761753	0.606864	0.195915
chr21	46243963	46245849	SVA_D:Other:Other:+	0.868277	0.731791	0.612718
chr21	46687926	46689722	SVA_F:Other:Other:+	0.912461	0.882907	0.155737
chr21	47204380	47206040	SVA_D:Other:Other:+	0.935258	0.794083	0.0494479
chr22	18040308	18041751	SVA_F:Other:Other:+	0.912087	0.482069	0.0185445
chr22	22030657	22032006	SVA_C:Other:Other:-	0.952155	0.934122	0.0862745
chr22	22201312	22202740	SVA_B:Other:Other:+	0.385912	0.0762682	0.0213294
chr22	22237232	22239116	SVA_D:Other:Other:-	0.931027	0.797295	0.169697
chr22	24460980	24462011	SVA_D:Other:Other:-	0.948372	0.890189	0.115397
chr22	25673122	25674642	SVA_D:Other:Other:-	0.663151	0.159634	0.0809546
chr22	28948738	28950375	SVA_D:Other:Other:+	0.886847	0.738121	0.208189
chr22	29947774	29949242	SVA_C:Other:Other:+	0.572347	0.0935612	0.0727891
chr22	30039281	30040962	SVA_D:Other:Other:-	0.884765	0.581444	0.0453416
chr22	30462055	30463514	SVA_C:Other:Other:+	0.71597	0.0486099	0.151872
chr22	31026995	31028513	SVA_D:Other:Other:-	0.937813	0.880084	0.198168
chr22	31579368	31580946	SVA_B:Other:Other:-	0.940463	0.720203	0.186204
chr22	35021272	35022965	SVA_D:Other:Other:-	0.697979	0.176847	0.264103
chr22	35079693	35081258	SVA_D:Other:Other:-	0.796135	0.440164	0.332778
chr22	38182206	38183623	SVA_D:Other:Other:+	0.909066	0.316743	0.0478788
chr22	38805407	38806730	SVA_B:Other:Other:-	0.961242	0.490916	0.0179894
chr22	41690027	41691719	SVA_D:Other:Other:+	0.775702	0.144752	0.206988
chr22	42026496	42028188	SVA_D:Other:Other:-	0.937751	0.941884	0.154304
chr22	43145974	43147309	SVA_D:Other:Other:-	0.447148	0.0776349	0.0524397
chr22	43367119	43368518	SVA_B:Other:Other:+	0.906027	0.845207	0.079808
chr22	50427777	50429062	SVA_A:Other:Other:-	0.945339	0.926092	0.637166
