# Supplementary material for: Potential role of KRAB-ZFP binding and transcriptional states on DNA methylation of retroelements in human male germ cells
Source: eLife. 2022 Mar 22;11:e76822. doi: 10.7554/eLife.76822 (PMC8967385; doi:10.7554/eLife.76822)
Supplement: Figure 5—source data 1. [file elife-76822-fig5-data1.xlsx]

## Sheet: Sheet1
Figure5-source data 1: Raw. Bar graphs showing the fraction of SVA_B~F copies inserted in a gene body.
SVA_B-F	Sense	Anti-sense	Non-genic
total	150	582	709
low-High-High	9	143	30
low-Low-Low	7	7	43
low-High-Low	13	50	65

## Sheet: Sheet2
Figure5-source data 2: Raw. Violin plots showing the expression of genes in adult spermatogonial stem cells 2 (Sohni et al. 2019).
group	expression	cell type	gene
Low:High:High:	5.01738	A1T:SSC1	CREBL2
Low:High:High:	6.28887	A1T:SSC1	SYNE2
Low:High:High:	4.81851	A1T:SSC1	ZBED6
random	-1.83861	A1T:SSC1	DAB1-AS1
Low:High:High:	5.83865	A1T:SSC1	SPTBN1
Low:High:Low:	2.01785	A1T:SSC1	ATP7A
random	-3.32193	A1T:SSC1	RP11-16L9.4
Low:High:High:	6.09125	A1T:SSC1	MPZL1
Low:High:High:	5.88625	A1T:SSC1	RABGAP1
Low:High:High:	3.04868	A1T:SSC1	PTPN9
Low:High:High:	5.53427	A1T:SSC1	PAK2
random	5.35949	A1T:SSC1	TMTC4
Low:High:Low:	2.18535	A1T:SSC1	NNT
Low:High:Low:	3.71571	A1T:SSC1	GLDC
random	-0.730501	A1T:SSC1	NBPF12
Low:High:Low:	4.83284	A1T:SSC1	SHQ1
random	-0.403465	A1T:SSC1	SPPL2C
random	-0.995891	A1T:SSC1	CTA-398F10.2
Low:High:Low:	3.49155	A1T:SSC1	GEMIN6
random	2.8839	A1T:SSC1	RP11-142A22.4
Low:High:High:	3.59493	A1T:SSC1	AGPAT3
Low:Low:Low:	2.12331	A1T:SSC1	ZC3HAV1
random	2.18835	A1T:SSC1	BPNT1
Low:High:High:	2.98291	A1T:SSC1	KDM6A
Low:High:High:	4.12001	A1T:SSC1	TAOK1
Low:High:High:	5.26778	A1T:SSC1	ACLY
Low:High:High:	6.7701	A1T:SSC1	NEK1
Low:High:High:	6.46049	A1T:SSC1	SCAPER
random	0.441548	A1T:SSC1	CTD-2587M2.1
random	6.27219	A1T:SSC1	CXADR
Low:High:High:	6.07704	A1T:SSC1	ABHD12
Low:High:High:	1.156	A1T:SSC1	PLEKHA7
random	0.795006	A1T:SSC1	LGALS9
Low:High:High:	4.02103	A1T:SSC1	RYR2
Low:High:High:	3.34809	A1T:SSC1	FSTL1
Low:High:High:	3.45816	A1T:SSC1	KLHDC4
random	6.16758	A1T:SSC1	USP48
Low:High:Low:	3.49185	A1T:SSC1	RPGRIP1L
Low:High:High:	5.53247	A1T:SSC1	STAM2
random	-0.49197	A1T:SSC1	RP11-234O6.2
Low:High:Low:	2.75166	A1T:SSC1	NGEF
Low:High:High:	2.56906	A1T:SSC1	CTNNA3
Low:High:High:	4.1068	A1T:SSC1	SPICE1
Low:High:High:	8.82709	A1T:SSC1	CCT3
Low:High:High:	4.63498	A1T:SSC1	UTRN
Low:High:High:	5.48958	A1T:SSC1	COBL
random	-0.417114	A1T:SSC1	TMPRSS11A
random	2.80535	A1T:SSC1	MCM8
Low:High:Low:	4.30495	A1T:SSC1	RORA
Low:High:High:	6.09562	A1T:SSC1	PTPN2
random	-3.32193	A1T:SSC1	OR11H6
Low:High:Low:	-3.32193	A1T:SSC1	RMDN2-AS1
random	-3.32193	A1T:SSC1	RP11-3L21.2
random	-3.32193	A1T:SSC1	SMCO3
random	-3.32193	A1T:SSC1	RP5-940J5.8
random	-3.32193	A1T:SSC1	RP11-218I7.2
Low:High:High:	3.42619	A1T:SSC1	ZYG11A
random	-3.32193	A1T:SSC1	AC009478.1
Low:High:High:	4.70156	A1T:SSC1	IFT52
random	1.92866	A1T:SSC1	KRT23
random	5.83366	A1T:SSC1	COX8A
Low:High:High:	0.224487	A1T:SSC1	ZNF486
random	7.68235	A1T:SSC1	ELAVL1
random	0.838897	A1T:SSC1	LY96
Low:High:High:	4.45623	A1T:SSC1	CMTM4
Low:High:High:	-3.32193	A1T:SSC1	ANKHD1-EIF4EBP3
random	4.92661	A1T:SSC1	FUT8
random	5.79597	A1T:SSC1	SSBP2
Low:High:High:	5.60984	A1T:SSC1	EIF4G3
random	-0.586397	A1T:SSC1	AC004158.3
Low:High:Low:	6.43817	A1T:SSC1	KIAA0232
Low:High:High:	5.47133	A1T:SSC1	LONP1
Low:High:High:	5.43194	A1T:SSC1	CABIN1
random	6.89478	A1T:SSC1	NPC2
Low:High:Low:	2.32244	A1T:SSC1	GPD2
random	1.11315	A1T:SSC1	KIAA1161
random	-3.32193	A1T:SSC1	AC023115.2
Low:High:Low:	5.99302	A1T:SSC1	ERP44
Low:High:Low:	0.231367	A1T:SSC1	MRGPRX3
random	2.12622	A1T:SSC1	FOXO6
Low:High:High:	3.41989	A1T:SSC1	C5orf34
random	-3.32193	A1T:SSC1	RP11-105C19.1
Low:High:High:	7.3228	A1T:SSC1	SSBP3
random	2.08433	A1T:SSC1	ZNF230
Low:High:High:	2.73525	A1T:SSC1	MFN2
Low:High:High:	4.0457	A1T:SSC1	CCDC65
random	2.80172	A1T:SSC1	RP11-73E17.2
Low:High:High:	3.99654	A1T:SSC1	UBR1
random	6.39511	A1T:SSC1	LTV1
Low:High:High:	7.32442	A1T:SSC1	CDC42BPA
Low:High:Low:	5.11043	A1T:SSC1	CASK
Low:High:Low:	4.99766	A1T:SSC1	PNPT1
random	1.9989	A1T:SSC1	HNMT
random	0.231563	A1T:SSC1	RP11-19O2.2
random	4.45274	A1T:SSC1	DZIP1
Low:High:High:	4.41368	A1T:SSC1	CD2AP
Low:High:High:	4.62791	A1T:SSC1	CORO1C
Low:High:High:	7.65601	A1T:SSC1	PPFIA1
random	2.9268	A1T:SSC1	RP11-150C16.1
random	-3.32193	A1T:SSC1	RP11-680F20.6
Low:High:High:	6.59582	A1T:SSC1	RNF216
Low:High:High:	5.21841	A1T:SSC1	PIGU
Low:Low:Low:	2.28076	A1T:SSC1	MYO5A
Low:High:Low:	4.75575	A1T:SSC1	SEC24D
Low:High:High:	4.55762	A1T:SSC1	NCOA3
Low:High:High:	4.84143	A1T:SSC1	ATG10
random	3.03479	A1T:SSC1	BEND6
Low:High:Low:	2.55399	A1T:SSC1	LIPE-AS1
random	5.94022	A1T:SSC1	ZNF775
Low:High:High:	5.93401	A1T:SSC1	KPNA3
Low:High:Low:	1.18117	A1T:SSC1	RELL1
random	3.91089	A1T:SSC1	RP1-179N16.6
random	-2.18791	A1T:SSC1	LGALS13
Low:High:Low:	3.94109	A1T:SSC1	KSR2
random	-1.0576	A1T:SSC1	RP11-13G14.4
random	-3.32193	A1T:SSC1	AF241725.6
Low:High:Low:	2.83003	A1T:SSC1	FAM122C
Low:High:High:	5.18379	A1T:SSC1	RMND1
random	0.293874	A1T:SSC1	RP11-367G6.3
random	5.90988	A1T:SSC1	ASUN
Low:High:Low:	2.67756	A1T:SSC1	POC1B
random	2.75524	A1T:SSC1	SOGA2
Low:High:High:	-0.305694	A1T:SSC1	FLG-AS1
Low:High:High:	7.42087	A1T:SSC1	NDUFAB1
Low:Low:Low:	-3.32193	A1T:SSC1	FRMD6-AS2
Low:High:High:	7.34979	A1T:SSC1	MED27
Low:High:High:	4.5456	A1T:SSC1	ITCH
Low:High:High:	1.0811	A1T:SSC1	STOX2
Low:High:High:	6.17256	A1T:SSC1	SQSTM1
Low:High:High:	3.87164	A1T:SSC1	PCBP3
Low:High:High:	5.8639	A1T:SSC1	SNX8
Low:High:High:	5.35035	A1T:SSC1	OIP5
Low:High:High:	-0.336927	A1T:SSC1	LINC00595
Low:High:Low:	3.80815	A1T:SSC1	PIK3CB
Low:High:High:	6.07133	A1T:SSC1	VBP1
Low:High:Low:	2.07382	A1T:SSC1	LINC00461
Low:High:Low:	2.04901	A1T:SSC1	SGMS1
Low:High:High:	1.06235	A1T:SSC1	DNAH17
Low:High:High:	9.69201	A1T:SSC1	XRCC6
Low:High:High:	4.21125	A1T:SSC1	FAM20B
Low:High:High:	5.28964	A1T:SSC1	GOLPH3
Low:High:High:	4.14982	A1T:SSC1	AGTPBP1
Low:High:High:	4.77929	A1T:SSC1	HS2ST1
Low:High:High:	2.69412	A1T:SSC1	PTGES3L
Low:High:High:	4.07717	A1T:SSC1	PPIL2
Low:High:High:	4.86463	A1T:SSC1	PPP6R3
Low:High:Low:	1.12475	A1T:SSC1	FAM66C
Low:High:High:	4.89981	A1T:SSC1	MYH10
Low:High:High:	7.25437	A1T:SSC1	UBE2E1
Low:High:Low:	4.74189	A1T:SSC1	AFF1
Low:High:High:	6.82596	A1T:SSC1	UBAP2
Low:High:High:	4.33098	A1T:SSC1	FBXL20
Low:High:High:	4.49518	A1T:SSC1	ARFIP1
Low:High:High:	5.48363	A1T:SSC1	ORAI1
Low:High:Low:	5.98283	A1T:SSC1	PAAF1
Low:High:Low:	1.94576	A1T:SSC1	GRK5
Low:High:Low:	5.5737	A1T:SSC1	SCAI
Low:High:Low:	2.58584	A1T:SSC1	MAP3K19
Low:High:High:	4.78777	A1T:SSC1	DDX23
Low:High:High:	7.86246	A1T:SSC1	SNW1
Low:High:High:	5.1747	A1T:SSC1	DST
Low:High:High:	7.04559	A1T:SSC1	NEMF
Low:High:High:	6.30549	A1T:SSC1	ZC3H11A
Low:High:Low:	0.526874	A1T:SSC1	RFTN2
Low:High:Low:	3.25613	A1T:SSC1	EFCAB13
Low:High:High:	2.28317	A1T:SSC1	SH3PXD2A
Low:High:High:	3.70521	A1T:SSC1	PDE4D
Low:High:High:	4.48464	A1T:SSC1	TK2
Low:High:High:	6.79628	A1T:SSC1	ANKRD11
Low:High:High:	5.84166	A1T:SSC1	NPLOC4
Low:High:High:	6.70441	A1T:SSC1	BDP1
Low:High:High:	5.09954	A1T:SSC1	CNOT6
Low:High:High:	7.09075	A1T:SSC1	CCSER2
Low:High:High:	5.5601	A1T:SSC1	GAPVD1
Low:High:High:	4.64607	A1T:SSC1	ARNT
Low:High:High:	6.15902	A1T:SSC1	PACSIN2
Low:High:High:	0.920017	A1T:SSC1	RBL1
Low:High:High:	3.6797	A1T:SSC1	PFKFB3
Low:High:High:	4.11282	A1T:SSC1	N4BP2
Low:High:High:	2.91495	A1T:SSC1	ADAMTSL3
Low:High:High:	4.86022	A1T:SSC1	INPP5F
Low:High:Low:	3.18551	A1T:SSC1	ZNF680
Low:High:High:	2.58772	A1T:SSC1	DNMBP
Low:High:High:	5.47487	A1T:SSC1	SMYD3
Low:High:Low:	5.47487	A1T:SSC1	SMYD3
Low:High:High:	2.41964	A1T:SSC1	POFUT2
Low:High:High:	4.715	A1T:SSC1	NUP155
Low:High:High:	5.15043	A1T:SSC1	STAG1
Low:High:High:	2.78482	A1T:SSC1	ZMIZ1
Low:High:High:	3.83711	A1T:SSC1	KDM4C
Low:High:Low:	6.74246	A1T:SSC1	PGK1
Low:Low:Low:	3.23219	A1T:SSC1	GABRA2
Low:High:High:	6.87798	A1T:SSC1	NIPBL
Low:High:High:	-3.32193	A1T:SSC1	PTGES3L-AARSD1
Low:High:High:	6.94451	A1T:SSC1	ACAA2
Low:High:High:	3.6725	A1T:SSC1	NUSAP1
Low:High:High:	5.52648	A1T:SSC1	TMX2
Low:High:High:	4.01181	A1T:SSC1	PI4K2B
Low:High:High:	5.43794	A1T:SSC1	ZNF292
Low:High:High:	2.84737	A1T:SSC1	RMDN2
Low:High:Low:	2.84737	A1T:SSC1	RMDN2
Low:High:High:	6.71645	A1T:SSC1	ATP6V1D
Low:High:High:	2.12526	A1T:SSC1	FAM160A1
Low:High:Low:	4.50663	A1T:SSC1	APBB2
Low:High:High:	4.00841	A1T:SSC1	ZNF429
Low:High:High:	4.35417	A1T:SSC1	DMXL1
Low:High:Low:	3.59632	A1T:SSC1	LAMA1
Low:High:Low:	3.97659	A1T:SSC1	INTS4
Low:High:High:	3.92073	A1T:SSC1	YTHDF3
Low:High:Low:	3.68438	A1T:SSC1	C9orf64
Low:High:High:	8.22412	A1T:SSC1	GKAP1
Low:High:Low:	3.77165	A1T:SSC1	NRXN1
Low:High:High:	5.25984	A1T:SSC1	KIF9
Low:High:Low:	7.10627	A1T:SSC1	ACOT7
Low:High:High:	6.68591	A1T:SSC1	ABI2
Low:High:High:	7.61281	A1T:SSC1	SLIRP
Low:Low:Low:	1.76018	A1T:SSC1	LCP1
Low:High:High:	4.51389	A1T:SSC1	GAS7
Low:High:High:	5.93786	A1T:SSC1	MAP3K2
Low:High:High:	4.06659	A1T:SSC1	HTT
Low:High:High:	5.08721	A1T:SSC1	ANKHD1
Low:High:High:	5.57479	A1T:SSC1	MRPS25
Low:High:High:	4.05581	A1T:SSC1	TAF1
Low:High:High:	7.26014	A1T:SSC1	ARID4B
Low:High:High:	5.04782	A1T:SSC1	VPS53
Low:High:High:	6.56523	A1T:SSC1	MAD1L1
Low:High:High:	7.88934	A1T:SSC1	SEC63
Low:High:High:	3.95311	A1T:SSC1	PTCD1
Low:High:Low:	4.61444	A1T:SSC1	SIL1
Low:High:High:	6.84543	A1T:SSC1	FAF1
Low:High:High:	3.13899	A1T:SSC1	RC3H2
Low:High:Low:	5.15221	A1T:SSC1	SESN1
Low:High:High:	5.33803	A1T:SSC1	ABL2
Low:Low:Low:	3.92381	A1T:SSC1	SVIL
Low:High:Low:	2.43717	A1T:SSC1	ARHGAP28
Low:High:Low:	3.56749	A1T:SSC1	ATF2
Low:High:High:	5.99888	A1T:SSC1	LARP1B
Low:High:Low:	5.92757	A1T:SSC1	RBMS1
Low:High:High:	4.78319	A1T:SSC1	ARMC1
Low:High:Low:	6.96653	A1T:SSC1	DTNB
Low:High:High:	5.68593	A1T:SSC1	ATXN2
Low:Low:Low:	1.75546	A1T:SSC1	TENM4
Low:High:Low:	4.47339	A1T:SSC1	CCDC178
Low:High:Low:	2.28284	A1T:SSC1	TMC1
Low:High:High:	2.71619	A1T:SSC1	FAM168A
Low:Low:Low:	2.76343	A1T:SSC1	ZSWIM5
Low:High:High:	3.93939	A1T:SSC1	RNF185
Low:High:High:	3.25503	A1T:SSC1	SHMT1
