# Supplementary material for: Potential role of KRAB-ZFP binding and transcriptional states on DNA methylation of retroelements in human male germ cells
Source: eLife. 2022 Mar 22;11:e76822. doi: 10.7554/eLife.76822 (PMC8967385; doi:10.7554/eLife.76822)
Supplement: Figure 6—source data 1. [file elife-76822-fig6-data1.xlsx]

## Sheet: Sheet1
Figure6-source data 1: Raw. Violin plots showing DNA methylation of SVA copies in previously reported three sperm donors (#1~#3) (Okae et al. 2014).
group	meth
Low:High:Low:Okae_Sperm-3	0.274146
Low:High:Low:Okae_Sperm-1	0.494331
Low:High:Low:Okae_Sperm-2	0.331633
Low:High:Low:Okae_Sperm-3	0.434529
Low:High:Low:Okae_Sperm-1	0.652349
Low:High:Low:Okae_Sperm-2	0.403697
Low:High:Low:Okae_Sperm-3	0.700793
Low:High:Low:Okae_Sperm-1	0.901867
Low:High:Low:Okae_Sperm-2	0.848425
Low:High:Low:Okae_Sperm-2	0.679965
Low:High:Low:Okae_Sperm-1	0.562066
Low:High:Low:Okae_Sperm-3	0.316889
Low:High:Low:Okae_Sperm-2	0.158471
Low:High:Low:Okae_Sperm-1	0.347258
Low:High:Low:Okae_Sperm-3	0.153594
Low:High:Low:Okae_Sperm-1	0.703787
Low:High:Low:Okae_Sperm-2	0.57057
Low:High:Low:Okae_Sperm-3	0.35451
Low:High:Low:Okae_Sperm-3	0.576583
Low:High:Low:Okae_Sperm-2	0.537282
Low:High:Low:Okae_Sperm-1	0.858303
Low:High:Low:Okae_Sperm-2	0.410417
Low:High:Low:Okae_Sperm-1	0.592587
Low:High:Low:Okae_Sperm-3	0.629205
Low:High:Low:Okae_Sperm-1	0.740679
Low:High:Low:Okae_Sperm-2	0.648408
Low:High:Low:Okae_Sperm-3	0.453548
Low:High:Low:Okae_Sperm-3	0.734524
Low:High:Low:Okae_Sperm-2	0.522961
Low:High:Low:Okae_Sperm-1	0.727441
Low:High:Low:Okae_Sperm-3	0.68136
Low:High:Low:Okae_Sperm-1	0.753527
Low:High:Low:Okae_Sperm-2	0.629537
Low:High:Low:Okae_Sperm-3	0.671567
Low:High:Low:Okae_Sperm-1	0.757313
Low:High:Low:Okae_Sperm-2	0.686328
Low:High:Low:Okae_Sperm-2	0.611785
Low:High:Low:Okae_Sperm-1	0.759226
Low:High:Low:Okae_Sperm-3	0.501691
Low:High:Low:Okae_Sperm-3	0.1359
Low:High:Low:Okae_Sperm-2	0.093315
Low:High:Low:Okae_Sperm-1	0.202762
Low:High:Low:Okae_Sperm-1	0.438095
Low:High:Low:Okae_Sperm-2	0.589994
Low:High:Low:Okae_Sperm-3	0.502762
Low:High:Low:Okae_Sperm-1	0.635088
Low:High:Low:Okae_Sperm-2	0.559763
Low:High:Low:Okae_Sperm-3	0.457234
Low:High:Low:Okae_Sperm-2	0.229736
Low:High:Low:Okae_Sperm-1	0.307397
Low:High:Low:Okae_Sperm-3	0.125397
Low:High:Low:Okae_Sperm-2	0.468811
Low:High:Low:Okae_Sperm-1	0.688331
Low:High:Low:Okae_Sperm-3	0.344295
Low:High:Low:Okae_Sperm-2	0.324747
Low:High:Low:Okae_Sperm-1	0.4693
Low:High:Low:Okae_Sperm-3	0.349962
Low:High:Low:Okae_Sperm-3	0.406151
Low:High:Low:Okae_Sperm-1	0.750214
Low:High:Low:Okae_Sperm-2	0.608531
Low:High:Low:Okae_Sperm-2	0.802059
Low:High:Low:Okae_Sperm-1	0.705516
Low:High:Low:Okae_Sperm-3	0.575245
Low:High:Low:Okae_Sperm-3	0.650021
Low:High:Low:Okae_Sperm-2	0.708189
Low:High:Low:Okae_Sperm-1	0.748901
Low:High:Low:Okae_Sperm-2	0.545314
Low:High:Low:Okae_Sperm-1	0.732507
Low:High:Low:Okae_Sperm-3	0.530555
Low:High:Low:Okae_Sperm-3	0.588036
Low:High:Low:Okae_Sperm-2	0.890268
Low:High:Low:Okae_Sperm-1	0.766649
Low:High:Low:Okae_Sperm-2	0.755574
Low:High:Low:Okae_Sperm-1	0.764996
Low:High:Low:Okae_Sperm-3	0.688086
Low:High:Low:Okae_Sperm-2	0.719961
Low:High:Low:Okae_Sperm-1	0.601531
Low:High:Low:Okae_Sperm-3	0.539903
Low:High:Low:Okae_Sperm-3	0.461471
Low:High:Low:Okae_Sperm-2	0.732143
Low:High:Low:Okae_Sperm-1	0.630952
Low:High:Low:Okae_Sperm-3	0.525649
Low:High:Low:Okae_Sperm-2	0.681339
Low:High:Low:Okae_Sperm-1	0.59881
Low:High:Low:Okae_Sperm-3	0.509512
Low:High:Low:Okae_Sperm-2	0.623326
Low:High:Low:Okae_Sperm-1	0.769478
Low:High:Low:Okae_Sperm-2	0.518956
Low:High:Low:Okae_Sperm-1	0.496723
Low:High:Low:Okae_Sperm-3	0.0702514
Low:High:Low:Okae_Sperm-2	0.363889
Low:High:Low:Okae_Sperm-1	0.539583
Low:High:Low:Okae_Sperm-3	0.146726
Low:High:Low:Okae_Sperm-3	0.613497
Low:High:Low:Okae_Sperm-2	0.626571
Low:High:Low:Okae_Sperm-1	0.775847
Low:High:Low:Okae_Sperm-1	0.74778
Low:High:Low:Okae_Sperm-2	0.846861
Low:High:Low:Okae_Sperm-3	0.648534
Low:High:Low:Okae_Sperm-2	0.463241
Low:High:Low:Okae_Sperm-1	0.634432
Low:High:Low:Okae_Sperm-3	0.424663
Low:High:Low:Okae_Sperm-3	0.442735
Low:High:Low:Okae_Sperm-1	0.479772
Low:High:Low:Okae_Sperm-2	0.456009
Low:High:Low:Okae_Sperm-2	0.70174
Low:High:Low:Okae_Sperm-1	0.731634
Low:High:Low:Okae_Sperm-3	0.603404
Low:High:Low:Okae_Sperm-3	0.182763
Low:High:Low:Okae_Sperm-2	0.297079
Low:High:Low:Okae_Sperm-1	0.433792
Low:High:Low:Okae_Sperm-3	0.157551
Low:High:Low:Okae_Sperm-2	0.194643
Low:High:Low:Okae_Sperm-1	0.240431
Low:High:Low:Okae_Sperm-3	0.879085
Low:High:Low:Okae_Sperm-1	0.647594
Low:High:Low:Okae_Sperm-2	0.714569
Low:High:Low:Okae_Sperm-2	0.791443
Low:High:Low:Okae_Sperm-1	0.790442
Low:High:Low:Okae_Sperm-3	0.652747
Low:High:Low:Okae_Sperm-1	0.853186
Low:High:Low:Okae_Sperm-2	0.668943
Low:High:Low:Okae_Sperm-3	0.562285
Low:High:Low:Okae_Sperm-3	0.64206
Low:High:Low:Okae_Sperm-2	0.722351
Low:High:Low:Okae_Sperm-1	0.824494
Low:High:Low:Okae_Sperm-2	0.556349
Low:High:Low:Okae_Sperm-1	0.690957
Low:High:Low:Okae_Sperm-3	0.378972
Low:High:Low:Okae_Sperm-3	0.349103
Low:High:Low:Okae_Sperm-1	0.785818
Low:High:Low:Okae_Sperm-2	0.610642
Low:High:Low:Okae_Sperm-2	0.389524
Low:High:Low:Okae_Sperm-1	0.373333
Low:High:Low:Okae_Sperm-3	0.0412698
Low:High:Low:Okae_Sperm-3	0.364227
Low:High:Low:Okae_Sperm-1	0.579666
Low:High:Low:Okae_Sperm-2	0.64624
Low:High:Low:Okae_Sperm-2	0.578202
Low:High:Low:Okae_Sperm-1	0.54529
Low:High:Low:Okae_Sperm-3	0.386049
Low:High:Low:Okae_Sperm-3	0.386069
Low:High:Low:Okae_Sperm-2	0.535881
Low:High:Low:Okae_Sperm-1	0.644829
Low:High:Low:Okae_Sperm-3	0.415339
Low:High:Low:Okae_Sperm-1	0.746071
Low:High:Low:Okae_Sperm-2	0.55641
Low:High:Low:Okae_Sperm-3	0.777259
Low:High:Low:Okae_Sperm-2	0.75907
Low:High:Low:Okae_Sperm-1	0.75029
Low:High:Low:Okae_Sperm-2	0.467676
Low:High:Low:Okae_Sperm-1	0.653763
Low:High:Low:Okae_Sperm-3	0.261083
Low:High:Low:Okae_Sperm-1	0.728996
Low:High:Low:Okae_Sperm-2	0.828761
Low:High:Low:Okae_Sperm-3	0.765075
Low:High:Low:Okae_Sperm-3	0.64682
Low:High:Low:Okae_Sperm-1	0.715223
Low:High:Low:Okae_Sperm-2	0.726388
Low:High:Low:Okae_Sperm-3	0.624515
Low:High:Low:Okae_Sperm-1	0.601224
Low:High:Low:Okae_Sperm-2	0.871934
Low:High:Low:Okae_Sperm-1	0.611887
Low:High:Low:Okae_Sperm-2	0.439524
Low:High:Low:Okae_Sperm-3	0.495641
Low:High:Low:Okae_Sperm-1	0.750359
Low:High:Low:Okae_Sperm-2	0.448424
Low:High:Low:Okae_Sperm-3	0.415119
Low:High:Low:Okae_Sperm-3	0.247945
Low:High:Low:Okae_Sperm-1	0.660998
Low:High:Low:Okae_Sperm-2	0.584794
Low:High:Low:Okae_Sperm-3	0.42627
Low:High:Low:Okae_Sperm-2	0.69089
Low:High:Low:Okae_Sperm-1	0.608861
Low:High:Low:Okae_Sperm-3	0.136923
Low:High:Low:Okae_Sperm-2	0.312353
Low:High:Low:Okae_Sperm-1	0.643021
Low:High:Low:Okae_Sperm-3	0.463438
Low:High:Low:Okae_Sperm-1	0.574625
Low:High:Low:Okae_Sperm-2	0.647239
Low:High:Low:Okae_Sperm-2	0.747846
Low:High:Low:Okae_Sperm-1	0.933333
Low:High:Low:Okae_Sperm-3	0.45337
Low:High:Low:Okae_Sperm-2	0.678836
Low:High:Low:Okae_Sperm-1	0.76886
Low:High:Low:Okae_Sperm-3	0.27479
Low:High:Low:Okae_Sperm-2	0.663429
Low:High:Low:Okae_Sperm-1	0.740956
Low:High:Low:Okae_Sperm-3	0.48525
Low:High:Low:Okae_Sperm-3	0.403815
Low:High:Low:Okae_Sperm-1	0.618449
Low:High:Low:Okae_Sperm-2	0.663095
Low:High:Low:Okae_Sperm-2	0.300907
Low:High:Low:Okae_Sperm-1	0.539579
Low:High:Low:Okae_Sperm-3	0.192857
Low:High:Low:Okae_Sperm-2	0.61919
Low:High:Low:Okae_Sperm-1	0.743074
Low:High:Low:Okae_Sperm-3	0.442501
Low:High:Low:Okae_Sperm-3	0.419383
Low:High:Low:Okae_Sperm-1	0.635746
Low:High:Low:Okae_Sperm-2	0.461964
Low:High:Low:Okae_Sperm-3	0.264997
Low:High:Low:Okae_Sperm-1	0.644599
Low:High:Low:Okae_Sperm-2	0.430294
Low:High:Low:Okae_Sperm-3	0.146207
Low:High:Low:Okae_Sperm-1	0.38105
Low:High:Low:Okae_Sperm-2	0.318469
High:High:High:Okae_Sperm-1	0.956944
High:High:High:Okae_Sperm-2	0.968948
High:High:High:Okae_Sperm-3	0.875035
High:High:High:Okae_Sperm-1	0.923695
High:High:High:Okae_Sperm-2	0.857382
High:High:High:Okae_Sperm-3	0.903509
High:High:High:Okae_Sperm-3	0.952972
High:High:High:Okae_Sperm-1	0.949655
High:High:High:Okae_Sperm-2	0.917677
High:High:High:Okae_Sperm-1	0.925294
High:High:High:Okae_Sperm-2	0.909733
High:High:High:Okae_Sperm-3	0.934825
High:High:High:Okae_Sperm-3	0.910687
High:High:High:Okae_Sperm-2	0.941675
High:High:High:Okae_Sperm-1	0.909153
High:High:High:Okae_Sperm-1	0.979087
High:High:High:Okae_Sperm-2	0.748557
High:High:High:Okae_Sperm-3	0.903776
High:High:High:Okae_Sperm-1	0.903256
High:High:High:Okae_Sperm-2	0.94445
High:High:High:Okae_Sperm-3	0.923704
High:High:High:Okae_Sperm-2	0.899033
High:High:High:Okae_Sperm-1	0.920381
High:High:High:Okae_Sperm-3	0.942923
High:High:High:Okae_Sperm-2	0.595701
High:High:High:Okae_Sperm-1	0.80362
High:High:High:Okae_Sperm-3	0.537432
High:High:High:Okae_Sperm-2	0.925634
High:High:High:Okae_Sperm-1	0.953122
High:High:High:Okae_Sperm-3	0.909
High:High:High:Okae_Sperm-3	0.957576
High:High:High:Okae_Sperm-2	0.907626
High:High:High:Okae_Sperm-1	0.845378
High:High:High:Okae_Sperm-3	0.773103
High:High:High:Okae_Sperm-2	0.88547
High:High:High:Okae_Sperm-1	0.912945
High:High:High:Okae_Sperm-2	0.922041
High:High:High:Okae_Sperm-1	0.938257
High:High:High:Okae_Sperm-3	0.890094
High:High:High:Okae_Sperm-3	0.665151
High:High:High:Okae_Sperm-2	0.631385
High:High:High:Okae_Sperm-1	0.566016
High:High:High:Okae_Sperm-2	0.888187
High:High:High:Okae_Sperm-1	0.954381
High:High:High:Okae_Sperm-3	0.812851
High:High:High:Okae_Sperm-2	0.827883
High:High:High:Okae_Sperm-1	0.954501
High:High:High:Okae_Sperm-3	0.866723
High:High:High:Okae_Sperm-3	0.895442
High:High:High:Okae_Sperm-1	0.970839
High:High:High:Okae_Sperm-2	0.961798
High:High:High:Okae_Sperm-1	0.955996
High:High:High:Okae_Sperm-2	0.941686
High:High:High:Okae_Sperm-3	0.905023
High:High:High:Okae_Sperm-1	0.955249
High:High:High:Okae_Sperm-2	0.783928
High:High:High:Okae_Sperm-3	0.890826
High:High:High:Okae_Sperm-3	0.800572
High:High:High:Okae_Sperm-2	0.849619
High:High:High:Okae_Sperm-1	0.846457
High:High:High:Okae_Sperm-3	0.842571
High:High:High:Okae_Sperm-1	0.90489
High:High:High:Okae_Sperm-2	0.910913
High:High:High:Okae_Sperm-1	0.962621
High:High:High:Okae_Sperm-2	0.873876
High:High:High:Okae_Sperm-3	0.921787
High:High:High:Okae_Sperm-3	0.245241
High:High:High:Okae_Sperm-1	0.599679
High:High:High:Okae_Sperm-2	0.556015
High:High:High:Okae_Sperm-2	0.834584
High:High:High:Okae_Sperm-1	0.940511
High:High:High:Okae_Sperm-3	0.93115
High:High:High:Okae_Sperm-1	0.899898
High:High:High:Okae_Sperm-2	0.743907
High:High:High:Okae_Sperm-3	0.674002
High:High:High:Okae_Sperm-3	0.778251
High:High:High:Okae_Sperm-2	0.931666
High:High:High:Okae_Sperm-1	0.943114
High:High:High:Okae_Sperm-1	0.947356
High:High:High:Okae_Sperm-2	0.934494
High:High:High:Okae_Sperm-3	0.915169
High:High:High:Okae_Sperm-3	0.721878
High:High:High:Okae_Sperm-1	0.627451
High:High:High:Okae_Sperm-2	0.619345
High:High:High:Okae_Sperm-3	0.912364
High:High:High:Okae_Sperm-2	0.971047
High:High:High:Okae_Sperm-1	0.903204
High:High:High:Okae_Sperm-2	0.943525
High:High:High:Okae_Sperm-1	0.945971
High:High:High:Okae_Sperm-3	0.94477
High:High:High:Okae_Sperm-3	0.86782
High:High:High:Okae_Sperm-1	0.989541
High:High:High:Okae_Sperm-2	0.823424
High:High:High:Okae_Sperm-1	0.961772
High:High:High:Okae_Sperm-2	0.910965
High:High:High:Okae_Sperm-3	0.884113
High:High:High:Okae_Sperm-3	0.877893
High:High:High:Okae_Sperm-1	0.845121
High:High:High:Okae_Sperm-2	0.888199
High:High:High:Okae_Sperm-3	0.897998
High:High:High:Okae_Sperm-2	0.942068
High:High:High:Okae_Sperm-1	0.933151
High:High:High:Okae_Sperm-1	0.947456
High:High:High:Okae_Sperm-2	0.906973
High:High:High:Okae_Sperm-3	0.913457
High:High:High:Okae_Sperm-2	0.860089
High:High:High:Okae_Sperm-1	0.936092
High:High:High:Okae_Sperm-3	0.893162
High:High:High:Okae_Sperm-2	0.941377
High:High:High:Okae_Sperm-1	0.941065
High:High:High:Okae_Sperm-3	0.909231
High:High:High:Okae_Sperm-3	0.581383
High:High:High:Okae_Sperm-1	0.686222
High:High:High:Okae_Sperm-2	0.736035
High:High:High:Okae_Sperm-2	0.921792
High:High:High:Okae_Sperm-1	0.854921
High:High:High:Okae_Sperm-3	0.826868
High:High:High:Okae_Sperm-1	0.975238
High:High:High:Okae_Sperm-2	0.951952
High:High:High:Okae_Sperm-3	0.935666
High:High:High:Okae_Sperm-2	0.900298
High:High:High:Okae_Sperm-1	0.935712
High:High:High:Okae_Sperm-3	0.929398
High:High:High:Okae_Sperm-1	0.771982
High:High:High:Okae_Sperm-2	0.681261
High:High:High:Okae_Sperm-3	0.849333
High:High:High:Okae_Sperm-3	0.93281
High:High:High:Okae_Sperm-2	0.839796
High:High:High:Okae_Sperm-1	0.828571
High:High:High:Okae_Sperm-3	0.99619
High:High:High:Okae_Sperm-1	0.96391
High:High:High:Okae_Sperm-2	0.973934
High:High:High:Okae_Sperm-2	0.909175
High:High:High:Okae_Sperm-1	0.973858
High:High:High:Okae_Sperm-3	0.885441
High:High:High:Okae_Sperm-3	0.549797
High:High:High:Okae_Sperm-1	0.66962
High:High:High:Okae_Sperm-2	0.696871
High:High:High:Okae_Sperm-2	0.822864
High:High:High:Okae_Sperm-1	0.882604
High:High:High:Okae_Sperm-3	0.765964
High:High:High:Okae_Sperm-3	0.884956
High:High:High:Okae_Sperm-2	0.878573
High:High:High:Okae_Sperm-1	0.933627
High:High:High:Okae_Sperm-1	0.937798
High:High:High:Okae_Sperm-2	0.916707
High:High:High:Okae_Sperm-3	0.91064
High:High:High:Okae_Sperm-1	0.936376
High:High:High:Okae_Sperm-2	0.883677
High:High:High:Okae_Sperm-3	0.833418
High:High:High:Okae_Sperm-3	0.784096
High:High:High:Okae_Sperm-2	0.595042
High:High:High:Okae_Sperm-1	0.836723
High:High:High:Okae_Sperm-1	0.915357
High:High:High:Okae_Sperm-2	0.879066
High:High:High:Okae_Sperm-3	0.936453
High:High:High:Okae_Sperm-3	0.818558
High:High:High:Okae_Sperm-2	0.932576
High:High:High:Okae_Sperm-1	0.886912
High:High:High:Okae_Sperm-2	0.829688
High:High:High:Okae_Sperm-1	0.886181
High:High:High:Okae_Sperm-3	0.841467
High:High:High:Okae_Sperm-1	0.944053
High:High:High:Okae_Sperm-2	0.905068
High:High:High:Okae_Sperm-3	0.923206
High:High:High:Okae_Sperm-3	0.733571
High:High:High:Okae_Sperm-1	0.793729
High:High:High:Okae_Sperm-2	0.75131
High:High:High:Okae_Sperm-3	0.804189
High:High:High:Okae_Sperm-2	0.860459
High:High:High:Okae_Sperm-1	0.838436
High:High:High:Okae_Sperm-3	0.913905
High:High:High:Okae_Sperm-2	0.924584
High:High:High:Okae_Sperm-1	0.929968
High:High:High:Okae_Sperm-3	0.872493
High:High:High:Okae_Sperm-2	0.916764
High:High:High:Okae_Sperm-1	0.924803
High:High:High:Okae_Sperm-2	0.886573
High:High:High:Okae_Sperm-1	0.976841
High:High:High:Okae_Sperm-3	0.888604
High:High:High:Okae_Sperm-3	0.628676
High:High:High:Okae_Sperm-1	0.769732
High:High:High:Okae_Sperm-2	0.788498
High:High:High:Okae_Sperm-3	0.896578
High:High:High:Okae_Sperm-2	0.928714
High:High:High:Okae_Sperm-1	0.890885
High:High:High:Okae_Sperm-2	0.92971
High:High:High:Okae_Sperm-1	0.881812
High:High:High:Okae_Sperm-3	0.886046
High:High:High:Okae_Sperm-1	0.866802
High:High:High:Okae_Sperm-2	0.917989
High:High:High:Okae_Sperm-3	0.878928
High:High:High:Okae_Sperm-3	0.918504
High:High:High:Okae_Sperm-1	0.915532
High:High:High:Okae_Sperm-2	0.913055
High:High:High:Okae_Sperm-1	0.946962
High:High:High:Okae_Sperm-2	0.915025
High:High:High:Okae_Sperm-3	0.878018
High:High:High:Okae_Sperm-3	0.760398
High:High:High:Okae_Sperm-1	0.898577
High:High:High:Okae_Sperm-2	0.812997
High:High:High:Okae_Sperm-2	0.974478
High:High:High:Okae_Sperm-1	0.978154
High:High:High:Okae_Sperm-3	0.977554
High:High:High:Okae_Sperm-3	0.797779
High:High:High:Okae_Sperm-1	0.842746
High:High:High:Okae_Sperm-2	0.833333
High:High:High:Okae_Sperm-3	0.900051
High:High:High:Okae_Sperm-2	0.925403
High:High:High:Okae_Sperm-1	0.908763
High:High:High:Okae_Sperm-3	0.753431
High:High:High:Okae_Sperm-2	0.868305
High:High:High:Okae_Sperm-1	0.84792
High:High:High:Okae_Sperm-2	0.84311
High:High:High:Okae_Sperm-1	0.970196
High:High:High:Okae_Sperm-3	0.931133
High:High:High:Okae_Sperm-1	0.933333
High:High:High:Okae_Sperm-2	0.863733
High:High:High:Okae_Sperm-3	0.801734
High:High:High:Okae_Sperm-3	0.938342
High:High:High:Okae_Sperm-2	0.930556
High:High:High:Okae_Sperm-1	0.955667
High:High:High:Okae_Sperm-2	0.958833
High:High:High:Okae_Sperm-1	0.958647
High:High:High:Okae_Sperm-3	0.957323
High:High:High:Okae_Sperm-3	0.895286
High:High:High:Okae_Sperm-2	0.914868
High:High:High:Okae_Sperm-1	0.942787
High:High:High:Okae_Sperm-2	0.762144
High:High:High:Okae_Sperm-1	0.927541
High:High:High:Okae_Sperm-3	0.858144
High:High:High:Okae_Sperm-2	0.871059
High:High:High:Okae_Sperm-1	0.962282
High:High:High:Okae_Sperm-3	0.940097
High:High:High:Okae_Sperm-3	0.794723
High:High:High:Okae_Sperm-1	0.918942
High:High:High:Okae_Sperm-2	0.793487
High:High:High:Okae_Sperm-3	0.507223
High:High:High:Okae_Sperm-1	0.526626
High:High:High:Okae_Sperm-2	0.624045
High:High:High:Okae_Sperm-2	0.901009
High:High:High:Okae_Sperm-1	0.880152
High:High:High:Okae_Sperm-3	0.901341
High:High:High:Okae_Sperm-3	0.947656
High:High:High:Okae_Sperm-1	0.962196
High:High:High:Okae_Sperm-2	0.961726
High:High:High:Okae_Sperm-1	0.960407
High:High:High:Okae_Sperm-2	0.975325
High:High:High:Okae_Sperm-3	0.936712
High:High:High:Okae_Sperm-2	0.945603
High:High:High:Okae_Sperm-1	0.928852
High:High:High:Okae_Sperm-3	0.935412
Low:High:High:Okae_Sperm-2	0.943109
Low:High:High:Okae_Sperm-1	0.904855
Low:High:High:Okae_Sperm-3	0.92312
Low:High:High:Okae_Sperm-3	0.941414
Low:High:High:Okae_Sperm-2	0.883824
Low:High:High:Okae_Sperm-1	0.990196
Low:High:High:Okae_Sperm-3	0.696455
Low:High:High:Okae_Sperm-2	0.900372
Low:High:High:Okae_Sperm-1	0.886267
Low:High:High:Okae_Sperm-1	0.816017
Low:High:High:Okae_Sperm-2	0.821014
Low:High:High:Okae_Sperm-3	0.898032
Low:High:High:Okae_Sperm-1	0.758695
Low:High:High:Okae_Sperm-2	0.677853
Low:High:High:Okae_Sperm-3	0.610938
Low:High:High:Okae_Sperm-3	0.918454
Low:High:High:Okae_Sperm-2	0.885788
Low:High:High:Okae_Sperm-1	0.933333
Low:High:High:Okae_Sperm-3	0.668539
Low:High:High:Okae_Sperm-2	0.777481
Low:High:High:Okae_Sperm-1	0.895298
Low:High:High:Okae_Sperm-3	0.859619
Low:High:High:Okae_Sperm-2	0.893429
Low:High:High:Okae_Sperm-1	0.917427
Low:High:High:Okae_Sperm-3	0.843122
Low:High:High:Okae_Sperm-2	0.928002
Low:High:High:Okae_Sperm-1	0.867347
Low:High:High:Okae_Sperm-1	0.754977
Low:High:High:Okae_Sperm-2	0.856213
Low:High:High:Okae_Sperm-3	0.901627
Low:High:High:Okae_Sperm-1	0.938322
Low:High:High:Okae_Sperm-2	0.916959
Low:High:High:Okae_Sperm-3	0.935738
Low:High:High:Okae_Sperm-1	0.871001
Low:High:High:Okae_Sperm-2	0.8953
Low:High:High:Okae_Sperm-3	0.786133
Low:High:High:Okae_Sperm-1	0.871928
Low:High:High:Okae_Sperm-2	0.926144
Low:High:High:Okae_Sperm-3	0.81259
Low:High:High:Okae_Sperm-3	0.810059
Low:High:High:Okae_Sperm-2	0.910256
Low:High:High:Okae_Sperm-1	0.938194
Low:High:High:Okae_Sperm-3	0.850879
Low:High:High:Okae_Sperm-1	0.751519
Low:High:High:Okae_Sperm-2	0.880906
Low:High:High:Okae_Sperm-3	0.921133
Low:High:High:Okae_Sperm-1	0.956746
Low:High:High:Okae_Sperm-2	0.960386
Low:High:High:Okae_Sperm-3	0.942544
Low:High:High:Okae_Sperm-2	0.946846
Low:High:High:Okae_Sperm-1	0.954439
Low:High:High:Okae_Sperm-3	0.905806
Low:High:High:Okae_Sperm-2	0.838437
Low:High:High:Okae_Sperm-1	0.847149
Low:High:High:Okae_Sperm-3	0.857676
Low:High:High:Okae_Sperm-2	0.880776
Low:High:High:Okae_Sperm-1	0.892755
Low:High:High:Okae_Sperm-2	0.945946
Low:High:High:Okae_Sperm-1	0.901723
Low:High:High:Okae_Sperm-3	0.931543
Low:High:High:Okae_Sperm-3	0.921131
Low:High:High:Okae_Sperm-2	0.85
Low:High:High:Okae_Sperm-1	0.922582
Low:High:High:Okae_Sperm-2	0.761485
Low:High:High:Okae_Sperm-1	0.797298
Low:High:High:Okae_Sperm-3	0.64254
Low:High:High:Okae_Sperm-2	0.894405
Low:High:High:Okae_Sperm-1	0.85692
Low:High:High:Okae_Sperm-3	0.904337
Low:High:High:Okae_Sperm-3	0.765973
Low:High:High:Okae_Sperm-1	0.865705
Low:High:High:Okae_Sperm-2	0.858125
Low:High:High:Okae_Sperm-3	0.91338
Low:High:High:Okae_Sperm-1	0.966114
Low:High:High:Okae_Sperm-2	0.962465
Low:High:High:Okae_Sperm-3	0.597115
Low:High:High:Okae_Sperm-2	0.697354
Low:High:High:Okae_Sperm-1	0.713081
Low:High:High:Okae_Sperm-2	0.911989
Low:High:High:Okae_Sperm-1	0.945005
Low:High:High:Okae_Sperm-3	0.888317
Low:High:High:Okae_Sperm-1	0.952976
Low:High:High:Okae_Sperm-2	0.960236
Low:High:High:Okae_Sperm-3	0.951894
Low:High:High:Okae_Sperm-2	0.927005
Low:High:High:Okae_Sperm-1	0.957609
Low:High:High:Okae_Sperm-3	0.934632
Low:High:High:Okae_Sperm-1	0.875705
Low:High:High:Okae_Sperm-2	0.956853
Low:High:High:Okae_Sperm-3	0.836013
Low:High:High:Okae_Sperm-3	0.842751
Low:High:High:Okae_Sperm-1	0.908395
Low:High:High:Okae_Sperm-2	0.927222
Low:High:High:Okae_Sperm-3	0.720435
Low:High:High:Okae_Sperm-2	0.871389
Low:High:High:Okae_Sperm-1	0.821481
Low:High:High:Okae_Sperm-3	0.858428
Low:High:High:Okae_Sperm-2	0.935926
Low:High:High:Okae_Sperm-1	0.939196
Low:High:High:Okae_Sperm-3	0.893412
Low:High:High:Okae_Sperm-1	0.772521
Low:High:High:Okae_Sperm-2	0.875405
Low:High:High:Okae_Sperm-3	0.825966
Low:High:High:Okae_Sperm-1	0.884206
Low:High:High:Okae_Sperm-2	0.817113
Low:High:High:Okae_Sperm-1	0.962581
Low:High:High:Okae_Sperm-2	0.919921
Low:High:High:Okae_Sperm-3	0.75223
Low:High:High:Okae_Sperm-3	0.897816
Low:High:High:Okae_Sperm-2	0.967331
Low:High:High:Okae_Sperm-1	0.941441
Low:High:High:Okae_Sperm-3	0.884882
Low:High:High:Okae_Sperm-1	0.896009
Low:High:High:Okae_Sperm-2	0.914559
Low:High:High:Okae_Sperm-1	0.902066
Low:High:High:Okae_Sperm-2	0.933963
Low:High:High:Okae_Sperm-3	0.904296
Low:High:High:Okae_Sperm-3	0.834102
Low:High:High:Okae_Sperm-1	0.859235
Low:High:High:Okae_Sperm-2	0.883974
Low:High:High:Okae_Sperm-3	0.931796
Low:High:High:Okae_Sperm-2	0.964683
Low:High:High:Okae_Sperm-1	0.953333
Low:High:High:Okae_Sperm-3	0.862222
Low:High:High:Okae_Sperm-1	0.916348
Low:High:High:Okae_Sperm-2	0.960165
Low:High:High:Okae_Sperm-3	0.92672
Low:High:High:Okae_Sperm-2	0.891997
Low:High:High:Okae_Sperm-1	0.925231
Low:High:High:Okae_Sperm-3	0.817491
Low:High:High:Okae_Sperm-1	0.862393
Low:High:High:Okae_Sperm-2	0.867668
Low:High:High:Okae_Sperm-3	0.797108
Low:High:High:Okae_Sperm-2	0.846004
Low:High:High:Okae_Sperm-1	0.824871
Low:High:High:Okae_Sperm-2	0.977922
Low:High:High:Okae_Sperm-1	0.929245
Low:High:High:Okae_Sperm-3	0.924235
Low:High:High:Okae_Sperm-3	0.934479
Low:High:High:Okae_Sperm-1	0.909226
Low:High:High:Okae_Sperm-2	0.937586
Low:High:High:Okae_Sperm-3	0.886972
Low:High:High:Okae_Sperm-2	0.964302
Low:High:High:Okae_Sperm-1	0.955454
Low:High:High:Okae_Sperm-2	0.921218
Low:High:High:Okae_Sperm-1	0.966997
Low:High:High:Okae_Sperm-3	0.957504
Low:High:High:Okae_Sperm-1	0.926111
Low:High:High:Okae_Sperm-2	0.884039
Low:High:High:Okae_Sperm-3	0.93147
Low:High:High:Okae_Sperm-2	0.910471
Low:High:High:Okae_Sperm-1	0.939841
Low:High:High:Okae_Sperm-3	0.924115
Low:High:High:Okae_Sperm-3	0.898263
Low:High:High:Okae_Sperm-1	0.880159
Low:High:High:Okae_Sperm-2	0.930451
Low:High:High:Okae_Sperm-2	0.907756
Low:High:High:Okae_Sperm-1	0.968293
Low:High:High:Okae_Sperm-3	0.930204
Low:High:High:Okae_Sperm-1	0.944447
Low:High:High:Okae_Sperm-2	0.919173
Low:High:High:Okae_Sperm-3	0.857896
Low:High:High:Okae_Sperm-3	0.782879
Low:High:High:Okae_Sperm-2	0.847314
Low:High:High:Okae_Sperm-1	0.851504
Low:High:High:Okae_Sperm-3	0.807407
Low:High:High:Okae_Sperm-2	0.915476
Low:High:High:Okae_Sperm-1	0.98392
Low:High:High:Okae_Sperm-2	0.95221
Low:High:High:Okae_Sperm-1	0.927689
Low:High:High:Okae_Sperm-3	0.884891
Low:High:High:Okae_Sperm-3	0.746528
Low:High:High:Okae_Sperm-1	0.894359
Low:High:High:Okae_Sperm-2	0.843665
Low:High:High:Okae_Sperm-3	0.862909
Low:High:High:Okae_Sperm-1	0.904487
Low:High:High:Okae_Sperm-2	0.855794
Low:High:High:Okae_Sperm-3	0.911938
Low:High:High:Okae_Sperm-2	0.917908
Low:High:High:Okae_Sperm-1	0.957923
Low:High:High:Okae_Sperm-3	0.876221
Low:High:High:Okae_Sperm-1	0.920765
Low:High:High:Okae_Sperm-2	0.895635
Low:High:High:Okae_Sperm-3	0.87122
Low:High:High:Okae_Sperm-2	0.836765
Low:High:High:Okae_Sperm-1	0.797727
Low:High:High:Okae_Sperm-2	0.918786
Low:High:High:Okae_Sperm-1	0.937731
Low:High:High:Okae_Sperm-3	0.932937
Low:High:High:Okae_Sperm-2	0.895068
Low:High:High:Okae_Sperm-1	0.952698
Low:High:High:Okae_Sperm-3	0.899244
Low:High:High:Okae_Sperm-1	0.979592
Low:High:High:Okae_Sperm-2	0.914796
Low:High:High:Okae_Sperm-3	0.950371
Low:High:High:Okae_Sperm-3	0.895259
Low:High:High:Okae_Sperm-1	0.877744
Low:High:High:Okae_Sperm-2	0.962529
Low:High:High:Okae_Sperm-3	0.967728
Low:High:High:Okae_Sperm-1	0.942749
Low:High:High:Okae_Sperm-2	0.981818
Low:High:High:Okae_Sperm-3	0.778149
Low:High:High:Okae_Sperm-2	0.924452
Low:High:High:Okae_Sperm-1	0.903082
Low:High:High:Okae_Sperm-1	0.889021
Low:High:High:Okae_Sperm-2	0.844074
Low:High:High:Okae_Sperm-3	0.889116
Low:High:High:Okae_Sperm-3	0.913837
Low:High:High:Okae_Sperm-2	0.949663
Low:High:High:Okae_Sperm-1	0.935014
Low:High:High:Okae_Sperm-3	0.931958
Low:High:High:Okae_Sperm-1	0.818207
Low:High:High:Okae_Sperm-2	0.9375
Low:High:High:Okae_Sperm-3	0.845604
Low:High:High:Okae_Sperm-2	0.894981
Low:High:High:Okae_Sperm-1	0.902546
Low:High:High:Okae_Sperm-3	0.560122
Low:High:High:Okae_Sperm-1	0.630101
Low:High:High:Okae_Sperm-2	0.65119
Low:High:High:Okae_Sperm-3	0.92248
Low:High:High:Okae_Sperm-2	0.925815
Low:High:High:Okae_Sperm-1	0.814984
Low:High:High:Okae_Sperm-3	0.93369
Low:High:High:Okae_Sperm-2	0.984444
Low:High:High:Okae_Sperm-1	0.912771
Low:High:High:Okae_Sperm-3	0.912346
Low:High:High:Okae_Sperm-2	0.977564
Low:High:High:Okae_Sperm-1	0.928708
Low:High:High:Okae_Sperm-3	0.648221
Low:High:High:Okae_Sperm-2	0.780899
Low:High:High:Okae_Sperm-1	0.700931
Low:High:High:Okae_Sperm-2	0.946889
Low:High:High:Okae_Sperm-1	0.952393
Low:High:High:Okae_Sperm-3	0.972391
Low:High:High:Okae_Sperm-3	0.877603
Low:High:High:Okae_Sperm-2	0.928571
Low:High:High:Okae_Sperm-1	0.828193
Low:High:High:Okae_Sperm-3	0.94066
Low:High:High:Okae_Sperm-2	0.940776
Low:High:High:Okae_Sperm-1	0.951559
Low:High:High:Okae_Sperm-3	0.910671
Low:High:High:Okae_Sperm-2	0.821534
Low:High:High:Okae_Sperm-1	0.83998
Low:High:High:Okae_Sperm-2	0.805791
Low:High:High:Okae_Sperm-1	0.972551
Low:High:High:Okae_Sperm-3	0.940741
Low:High:High:Okae_Sperm-1	0.857376
Low:High:High:Okae_Sperm-2	0.747183
Low:High:High:Okae_Sperm-3	0.81835
Low:High:High:Okae_Sperm-1	0.95496
Low:High:High:Okae_Sperm-2	0.913113
Low:High:High:Okae_Sperm-3	0.884715
Low:High:High:Okae_Sperm-3	0.940052
Low:High:High:Okae_Sperm-2	0.791306
Low:High:High:Okae_Sperm-1	0.84986
Low:High:High:Okae_Sperm-3	0.886592
Low:High:High:Okae_Sperm-1	0.970401
Low:High:High:Okae_Sperm-2	0.926671
Low:High:High:Okae_Sperm-3	0.936564
Low:High:High:Okae_Sperm-1	0.965254
Low:High:High:Okae_Sperm-2	0.871429
Low:High:High:Okae_Sperm-3	0.953217
Low:High:High:Okae_Sperm-2	0.879004
Low:High:High:Okae_Sperm-1	0.913926
Low:High:High:Okae_Sperm-1	0.916428
Low:High:High:Okae_Sperm-2	0.943917
Low:High:High:Okae_Sperm-3	0.891881
Low:High:High:Okae_Sperm-1	0.921429
Low:High:High:Okae_Sperm-2	0.903056
Low:High:High:Okae_Sperm-3	0.959628
Low:High:High:Okae_Sperm-3	0.829552
Low:High:High:Okae_Sperm-2	0.679079
Low:High:High:Okae_Sperm-1	0.808874
Low:High:High:Okae_Sperm-3	0.935752
Low:High:High:Okae_Sperm-2	0.975407
Low:High:High:Okae_Sperm-1	0.950427
Low:High:High:Okae_Sperm-1	0.926535
Low:High:High:Okae_Sperm-2	0.934416
Low:High:High:Okae_Sperm-3	0.909782
Low:High:High:Okae_Sperm-2	0.920811
Low:High:High:Okae_Sperm-1	0.883564
Low:High:High:Okae_Sperm-3	0.838721
Low:High:High:Okae_Sperm-1	0.846726
Low:High:High:Okae_Sperm-2	0.733502
Low:High:High:Okae_Sperm-3	0.671157
Low:High:High:Okae_Sperm-2	0.944026
Low:High:High:Okae_Sperm-1	0.916434
Low:High:High:Okae_Sperm-3	0.846104
Low:High:High:Okae_Sperm-2	0.827812
Low:High:High:Okae_Sperm-1	0.758996
Low:High:High:Okae_Sperm-3	0.898221
Low:High:High:Okae_Sperm-3	0.873365
Low:High:High:Okae_Sperm-2	0.875064
Low:High:High:Okae_Sperm-1	0.874567
Low:High:High:Okae_Sperm-3	0.925877
Low:High:High:Okae_Sperm-1	0.960363
Low:High:High:Okae_Sperm-2	0.923953
Low:High:High:Okae_Sperm-1	0.931997
Low:High:High:Okae_Sperm-2	0.84386
Low:High:High:Okae_Sperm-3	0.936032
Low:High:High:Okae_Sperm-3	0.961341
Low:High:High:Okae_Sperm-1	0.964541
Low:High:High:Okae_Sperm-2	0.924686
Low:High:High:Okae_Sperm-3	0.868239
Low:High:High:Okae_Sperm-2	0.860855
Low:High:High:Okae_Sperm-1	0.859711
Low:High:High:Okae_Sperm-3	0.907842
Low:High:High:Okae_Sperm-1	0.951109
Low:High:High:Okae_Sperm-2	0.878663
Low:High:High:Okae_Sperm-1	0.933305
Low:High:High:Okae_Sperm-2	0.905926
Low:High:High:Okae_Sperm-3	0.915804
Low:High:High:Okae_Sperm-3	0.855441
Low:High:High:Okae_Sperm-2	0.860576
Low:High:High:Okae_Sperm-1	0.750106
Low:High:High:Okae_Sperm-3	0.870135
Low:High:High:Okae_Sperm-2	0.966925
Low:High:High:Okae_Sperm-1	0.963547
Low:High:High:Okae_Sperm-3	0.871803
Low:High:High:Okae_Sperm-1	0.875945
Low:High:High:Okae_Sperm-2	0.889615
Low:Low:Low:Okae_Sperm-3	0.0893991
Low:Low:Low:Okae_Sperm-1	0.164986
Low:Low:Low:Okae_Sperm-2	0.0866071
Low:Low:Low:Okae_Sperm-3	0.0589744
Low:Low:Low:Okae_Sperm-1	0.0831061
Low:Low:Low:Okae_Sperm-2	0.0602395
Low:Low:Low:Okae_Sperm-2	0.0912698
Low:Low:Low:Okae_Sperm-1	0.175641
Low:Low:Low:Okae_Sperm-3	0.0674289
Low:Low:Low:Okae_Sperm-2	0.0105263
Low:Low:Low:Okae_Sperm-1	0.0892562
Low:Low:Low:Okae_Sperm-3	0.0147941
Low:Low:Low:Okae_Sperm-3	0.219775
Low:Low:Low:Okae_Sperm-1	0.290943
Low:Low:Low:Okae_Sperm-2	0.269422
Low:Low:Low:Okae_Sperm-3	0.15873
Low:Low:Low:Okae_Sperm-1	0.0746439
Low:Low:Low:Okae_Sperm-2	0.184265
Low:Low:Low:Okae_Sperm-3	0.0609726
Low:Low:Low:Okae_Sperm-2	0.0564459
Low:Low:Low:Okae_Sperm-1	0.0437911
Low:Low:Low:Okae_Sperm-1	0.0599311
Low:Low:Low:Okae_Sperm-2	0.113095
Low:Low:Low:Okae_Sperm-3	0.0388211
Low:Low:Low:Okae_Sperm-3	0.0987778
Low:Low:Low:Okae_Sperm-2	0.0876525
Low:Low:Low:Okae_Sperm-1	0.119389
Low:Low:Low:Okae_Sperm-1	0.301392
Low:Low:Low:Okae_Sperm-2	0.342143
Low:Low:Low:Okae_Sperm-3	0.0362963
Low:Low:Low:Okae_Sperm-3	0.0610969
Low:Low:Low:Okae_Sperm-1	0.0475397
Low:Low:Low:Okae_Sperm-2	0.0574722
Low:Low:Low:Okae_Sperm-3	0.0030303
Low:Low:Low:Okae_Sperm-1	0.0631579
Low:Low:Low:Okae_Sperm-2	0.00952381
Low:Low:Low:Okae_Sperm-3	0.0299916
Low:Low:Low:Okae_Sperm-1	0.0583008
Low:Low:Low:Okae_Sperm-2	0.0455787
Low:Low:Low:Okae_Sperm-3	0.0352007
Low:Low:Low:Okae_Sperm-2	0.0193939
Low:Low:Low:Okae_Sperm-1	0.036132
Low:Low:Low:Okae_Sperm-3	0.00277778
Low:Low:Low:Okae_Sperm-2	0.08
Low:Low:Low:Okae_Sperm-1	0.00867347
Low:Low:Low:Okae_Sperm-1	0.004329
Low:Low:Low:Okae_Sperm-2	0.0824039
Low:Low:Low:Okae_Sperm-3	0.016802
Low:Low:Low:Okae_Sperm-1	0.0589744
Low:Low:Low:Okae_Sperm-2	0.0943723
Low:Low:Low:Okae_Sperm-3	0.0519691
Low:Low:Low:Okae_Sperm-1	0.0236025
Low:Low:Low:Okae_Sperm-2	0.0450653
Low:Low:Low:Okae_Sperm-3	0.0168702
Low:Low:Low:Okae_Sperm-2	0.183814
Low:Low:Low:Okae_Sperm-1	0.110417
Low:Low:Low:Okae_Sperm-3	0.15381
Low:Low:Low:Okae_Sperm-3	0.0399947
Low:Low:Low:Okae_Sperm-2	0.0104291
Low:Low:Low:Okae_Sperm-1	0.0137143
Low:Low:Low:Okae_Sperm-3	0.0437612
Low:Low:Low:Okae_Sperm-1	0.126496
Low:Low:Low:Okae_Sperm-2	0.11763
Low:Low:Low:Okae_Sperm-1	0.0507439
Low:Low:Low:Okae_Sperm-2	0.102473
Low:Low:Low:Okae_Sperm-3	0.0652846
Low:Low:Low:Okae_Sperm-3	0.0133929
Low:Low:Low:Okae_Sperm-2	0.0802951
Low:Low:Low:Okae_Sperm-1	0.0409613
Low:Low:Low:Okae_Sperm-3	0.0701754
Low:Low:Low:Okae_Sperm-2	0.0349817
Low:Low:Low:Okae_Sperm-1	0.0977143
Low:Low:Low:Okae_Sperm-1	0.0948002
Low:Low:Low:Okae_Sperm-2	0.103083
Low:Low:Low:Okae_Sperm-3	0.0440141
Low:Low:Low:Okae_Sperm-3	0.0159222
Low:Low:Low:Okae_Sperm-2	0.121784
Low:Low:Low:Okae_Sperm-1	0.0243056
Low:Low:Low:Okae_Sperm-1	0.0796296
Low:Low:Low:Okae_Sperm-2	0.0344933
Low:Low:Low:Okae_Sperm-3	0.0302198
Low:Low:Low:Okae_Sperm-3	0.0438663
Low:Low:Low:Okae_Sperm-1	0.06513
Low:Low:Low:Okae_Sperm-2	0.0545827
Low:Low:Low:Okae_Sperm-3	0.0628205
Low:Low:Low:Okae_Sperm-1	0.148649
Low:Low:Low:Okae_Sperm-2	0.0670445
Low:Low:Low:Okae_Sperm-3	0.0266667
Low:Low:Low:Okae_Sperm-2	0.0346059
Low:Low:Low:Okae_Sperm-1	0.0622222
Low:Low:Low:Okae_Sperm-1	0.022619
Low:Low:Low:Okae_Sperm-2	0.0316333
Low:Low:Low:Okae_Sperm-3	0.00529101
Low:Low:Low:Okae_Sperm-1	0.348581
Low:Low:Low:Okae_Sperm-2	0.41704
Low:Low:Low:Okae_Sperm-3	0.222643
Low:Low:Low:Okae_Sperm-3	0.0418803
Low:Low:Low:Okae_Sperm-1	0.0695714
Low:Low:Low:Okae_Sperm-2	0
Low:Low:Low:Okae_Sperm-3	0.0285714
Low:Low:Low:Okae_Sperm-2	0.0317621
Low:Low:Low:Okae_Sperm-1	0.032862
Low:Low:Low:Okae_Sperm-3	0.155466
Low:Low:Low:Okae_Sperm-2	0.0864965
Low:Low:Low:Okae_Sperm-1	0.16862
Low:Low:Low:Okae_Sperm-2	0.042437
Low:Low:Low:Okae_Sperm-1	0.100005
Low:Low:Low:Okae_Sperm-3	0.0338613
Low:Low:Low:Okae_Sperm-3	0.0639791
Low:Low:Low:Okae_Sperm-2	0.0478571
Low:Low:Low:Okae_Sperm-1	0.141253
Low:Low:Low:Okae_Sperm-2	0.0647727
Low:Low:Low:Okae_Sperm-1	0
Low:Low:Low:Okae_Sperm-3	0.0236597
Low:Low:Low:Okae_Sperm-3	0.0435466
Low:Low:Low:Okae_Sperm-1	0.159091
Low:Low:Low:Okae_Sperm-2	0.0973304
Low:Low:Low:Okae_Sperm-2	0.0472635
Low:Low:Low:Okae_Sperm-1	0.0636905
Low:Low:Low:Okae_Sperm-3	0.0509371
Low:Low:Low:Okae_Sperm-3	0.0268169
Low:Low:Low:Okae_Sperm-1	0.115772
Low:Low:Low:Okae_Sperm-2	0.0430556

## Sheet: Sheet2
Figure6-source data 2: Raw. Bar plots showing the fraction of analyzed full-length SVA copies by amplicon-seq.
		Analyzable (minCpG >= 10, min depth >= 5)
	Full length	K017	K024	K025	K026	K027
SVA_A	91	3	3	4	4	4
SVA_B	315	296	298	302	294	293
SVA_C	208	195	198	195	193	193
SVA_D	814	765	751	769	757	756
SVA_E	40	37	36	36	35	39
SVA_F	104	96	97	97	97	94

## Sheet: Sheet3
Figure6-source data 3: Raw. Violin plots showing DNA methylation levels of SVA copies in five sperm donors from amplicon-seq.
group	meth
High:High:High:K027	0.734828
High:High:High:K017	0.493103
High:High:High:K025	0.663233
High:High:High:K026	0.463978
High:High:High:K024	0.47115
High:High:High:K024	0.968706
High:High:High:K025	0.984583
High:High:High:K026	0.918925
High:High:High:K027	0.811857
High:High:High:K017	0.898794
High:High:High:K027	0.527937
High:High:High:K017	0.286565
High:High:High:K025	0.151718
High:High:High:K026	0.324715
High:High:High:K024	0.192514
High:High:High:K025	0.749533
High:High:High:K026	0.31331
High:High:High:K024	0.367882
High:High:High:K027	0.521856
High:High:High:K017	0.783333
High:High:High:K027	0.715261
High:High:High:K017	0.82588
High:High:High:K025	0.660606
High:High:High:K026	0.871285
High:High:High:K024	0.49119
High:High:High:K017	0.887702
High:High:High:K027	0.889288
High:High:High:K026	0.919485
High:High:High:K025	0.867287
High:High:High:K024	0.930156
High:High:High:K027	0.822549
High:High:High:K017	0.740903
High:High:High:K024	0.835474
High:High:High:K025	0.78222
High:High:High:K026	0.591467
High:High:High:K025	0.644776
High:High:High:K024	0.642495
High:High:High:K026	0.589082
High:High:High:K027	0.866314
High:High:High:K017	0.635056
High:High:High:K025	0.355086
High:High:High:K026	0.473468
High:High:High:K024	0.509794
High:High:High:K017	0.480292
High:High:High:K027	0.558115
High:High:High:K025	0.657814
High:High:High:K026	0.858002
High:High:High:K024	0.705623
High:High:High:K017	0.904876
High:High:High:K027	0.789739
High:High:High:K025	0.0148895
High:High:High:K026	0.011253
High:High:High:K024	0.109476
High:High:High:K027	0.0535665
High:High:High:K017	0.0451769
High:High:High:K025	0.165533
High:High:High:K026	0.174272
High:High:High:K024	0.198624
High:High:High:K027	0.327486
High:High:High:K017	0.110919
High:High:High:K025	0.875758
High:High:High:K024	0.724856
High:High:High:K026	0.858767
High:High:High:K027	0.875525
High:High:High:K017	0.852742
High:High:High:K024	0.260453
High:High:High:K025	0.535184
High:High:High:K026	0.64479
High:High:High:K027	0.63353
High:High:High:K017	0.631437
High:High:High:K017	0.803389
High:High:High:K027	0.906013
High:High:High:K026	0.793292
High:High:High:K025	0.847082
High:High:High:K024	0.529166
High:High:High:K017	0.275897
High:High:High:K027	0.446803
High:High:High:K025	0.274224
High:High:High:K026	0.417058
High:High:High:K024	0.487237
High:High:High:K025	0.889687
High:High:High:K026	0.931636
High:High:High:K024	0.927065
High:High:High:K027	0.914958
High:High:High:K017	0.935686
High:High:High:K017	0.460846
High:High:High:K027	0.600732
High:High:High:K025	0.726343
High:High:High:K026	0.919717
High:High:High:K024	0.44796
High:High:High:K026	0.702219
High:High:High:K025	0.655297
High:High:High:K024	0.657758
High:High:High:K027	0.794786
High:High:High:K017	0.648136
High:High:High:K027	0.253145
High:High:High:K017	0.463408
High:High:High:K025	0.398925
High:High:High:K026	0.485123
High:High:High:K024	0.246341
High:High:High:K025	0.805525
High:High:High:K024	0.790182
High:High:High:K026	0.754898
High:High:High:K027	0.758383
High:High:High:K017	0.77611
High:High:High:K024	0.800484
High:High:High:K025	0.686099
High:High:High:K026	0.642182
High:High:High:K027	0.728243
High:High:High:K017	0.693594
High:High:High:K027	0.865956
High:High:High:K017	0.9117
High:High:High:K024	0.939131
High:High:High:K025	0.872808
High:High:High:K026	0.92359
High:High:High:K026	0.941136
High:High:High:K025	0.926435
High:High:High:K024	0.947742
High:High:High:K027	0.930684
High:High:High:K017	0.895736
High:High:High:K024	0.812596
High:High:High:K025	0.803655
High:High:High:K026	0.772501
High:High:High:K017	0.868548
High:High:High:K027	0.728165
High:High:High:K025	0.920109
High:High:High:K026	0.937584
High:High:High:K024	0.903437
High:High:High:K017	0.894774
High:High:High:K027	0.878014
High:High:High:K027	0.870605
High:High:High:K017	0.900505
High:High:High:K024	0.911836
High:High:High:K025	0.896483
High:High:High:K026	0.885683
High:High:High:K027	0.602676
High:High:High:K017	0.603364
High:High:High:K026	0.731789
High:High:High:K025	0.668732
High:High:High:K024	0.363687
High:High:High:K025	0.700216
High:High:High:K024	0.3773
High:High:High:K026	0.689643
High:High:High:K027	0.798184
High:High:High:K017	0.678
High:High:High:K025	0.933377
High:High:High:K024	0.923553
High:High:High:K026	0.94065
High:High:High:K017	0.954186
High:High:High:K027	0.930479
High:High:High:K017	0.795279
High:High:High:K027	0.837537
High:High:High:K026	0.32777
High:High:High:K025	0.629732
High:High:High:K024	0.832379
High:High:High:K017	0.92976
High:High:High:K027	0.921171
High:High:High:K026	0.928972
High:High:High:K025	0.889843
High:High:High:K024	0.926914
High:High:High:K027	0.897932
High:High:High:K017	0.515597
High:High:High:K024	0.832049
High:High:High:K025	0.678579
High:High:High:K026	0.287471
High:High:High:K026	0.567699
High:High:High:K025	0.724679
High:High:High:K024	0.568722
High:High:High:K017	0.702032
High:High:High:K027	0.716295
High:High:High:K024	0.911789
High:High:High:K025	0.927031
High:High:High:K026	0.887815
High:High:High:K017	0.96051
High:High:High:K027	0.939248
High:High:High:K027	0.419891
High:High:High:K017	0.298552
High:High:High:K024	0.927097
High:High:High:K025	0.425208
High:High:High:K026	0.190722
High:High:High:K026	0.878924
High:High:High:K025	0.805474
High:High:High:K024	0.877018
High:High:High:K017	0.906609
High:High:High:K027	0.906873
High:High:High:K025	0.864299
High:High:High:K024	0.529188
High:High:High:K026	0.458031
High:High:High:K027	0.652772
High:High:High:K017	0.697287
High:High:High:K017	0.884881
High:High:High:K027	0.935684
High:High:High:K025	0.873521
High:High:High:K026	0.864116
High:High:High:K024	0.881453
High:High:High:K025	0.755478
High:High:High:K024	0.365703
High:High:High:K026	0.473652
High:High:High:K027	0.657351
High:High:High:K017	0.327992
High:High:High:K026	0.670459
High:High:High:K025	0.553279
High:High:High:K024	0.612041
High:High:High:K027	0.659242
High:High:High:K017	0.682848
High:High:High:K017	0.858043
High:High:High:K027	0.901005
High:High:High:K025	0.875475
High:High:High:K024	0.950202
High:High:High:K026	0.7235
High:High:High:K024	0.64092
High:High:High:K025	0.615526
High:High:High:K026	0.638697
High:High:High:K017	0.443336
High:High:High:K027	0.554459
High:High:High:K017	0.496155
High:High:High:K027	0.542648
High:High:High:K025	0.507382
High:High:High:K024	0.6054
High:High:High:K026	0.526424
High:High:High:K027	0.559011
High:High:High:K017	0.681861
High:High:High:K025	0.879803
High:High:High:K024	0.56089
High:High:High:K026	0.773407
Low:Low:Low:K027	0.106768
Low:Low:Low:K017	0.0474357
Low:Low:Low:K025	0.0336122
Low:Low:Low:K024	0.0469469
Low:Low:Low:K026	0.0442291
Low:Low:Low:K025	0.0203326
Low:Low:Low:K024	0.0256233
Low:Low:Low:K026	0.0153411
Low:Low:Low:K017	0.0439675
Low:Low:Low:K027	0.0420972
Low:Low:Low:K017	0.0421777
Low:Low:Low:K027	0.0416699
Low:Low:Low:K025	0.0413076
Low:Low:Low:K024	0.0630106
Low:Low:Low:K026	0.046169
Low:Low:Low:K025	0.0605765
Low:Low:Low:K026	0.054817
Low:Low:Low:K024	0.0566452
Low:Low:Low:K027	0.090129
Low:Low:Low:K017	0.0611001
Low:Low:Low:K027	0.0677842
Low:Low:Low:K017	0.0438002
Low:Low:Low:K024	0.056981
Low:Low:Low:K025	0.0471161
Low:Low:Low:K026	0.0468574
Low:Low:Low:K017	0.160335
Low:Low:Low:K027	0.384086
Low:Low:Low:K025	0.143215
Low:Low:Low:K024	0.250865
Low:Low:Low:K026	0.0994141
Low:Low:Low:K025	0.0404581
Low:Low:Low:K024	0.0416066
Low:Low:Low:K026	0.0628577
Low:Low:Low:K017	0.0460277
Low:Low:Low:K027	0.0521219
Low:Low:Low:K025	0.0551551
Low:Low:Low:K026	0.0355931
Low:Low:Low:K024	0.0532637
Low:Low:Low:K017	0.0392502
Low:Low:Low:K027	0.0685653
Low:Low:Low:K027	0.0986152
Low:Low:Low:K017	0.0724745
Low:Low:Low:K025	0.0570053
Low:Low:Low:K026	0.0679362
Low:Low:Low:K024	0.0458882
Low:Low:Low:K027	0.0319171
Low:Low:Low:K017	0.00443198
Low:Low:Low:K025	0.00673691
Low:Low:Low:K026	0.0172109
Low:Low:Low:K024	0.0168752
Low:Low:Low:K027	0.084662
Low:Low:Low:K017	0.0160355
Low:Low:Low:K026	0.0378338
Low:Low:Low:K025	0.0247529
Low:Low:Low:K024	0.0339267
Low:Low:Low:K024	0.029429
Low:Low:Low:K025	0.0123473
Low:Low:Low:K026	0.0137601
Low:Low:Low:K017	0
Low:Low:Low:K027	0.0700887
Low:Low:Low:K025	0.0128368
Low:Low:Low:K026	0.0109281
Low:Low:Low:K024	0.0151611
Low:Low:Low:K017	0.0144811
Low:Low:Low:K027	0.022465
Low:Low:Low:K017	0.00636287
Low:Low:Low:K027	0.0238938
Low:Low:Low:K024	0.00516789
Low:Low:Low:K025	0.0180414
Low:Low:Low:K026	0.00199489
Low:Low:Low:K027	0.0237755
Low:Low:Low:K017	0.0325566
Low:Low:Low:K026	0.00897204
Low:Low:Low:K025	0.0155094
Low:Low:Low:K024	0.0165139
Low:Low:Low:K027	0.0360609
Low:Low:Low:K017	0.00506314
Low:Low:Low:K026	0.0254433
Low:Low:Low:K025	0.0130199
Low:Low:Low:K024	0.00868412
Low:Low:Low:K017	0.0172553
Low:Low:Low:K027	0.0259258
Low:Low:Low:K025	0.0106348
Low:Low:Low:K024	0.04247
Low:Low:Low:K026	0.0361965
Low:Low:Low:K025	0.0490559
Low:Low:Low:K026	0.0417004
Low:Low:Low:K024	0.0793242
Low:Low:Low:K017	0.0505362
Low:Low:Low:K027	0.0527529
Low:Low:Low:K024	0.065391
Low:Low:Low:K025	0.0291678
Low:Low:Low:K026	0.0835892
Low:Low:Low:K027	0.0388118
Low:Low:Low:K017	0.0411249
Low:Low:Low:K027	0.073683
Low:Low:Low:K017	0.0453841
Low:Low:Low:K025	0.012267
Low:Low:Low:K024	0.0261068
Low:Low:Low:K026	0.0215482
Low:Low:Low:K026	0.0859134
Low:Low:Low:K025	0.0169844
Low:Low:Low:K024	0.0817187
Low:Low:Low:K017	0.0319795
Low:Low:Low:K027	0.138739
Low:Low:Low:K024	0.0525892
Low:Low:Low:K025	0.0607676
Low:Low:Low:K026	0.0120967
Low:Low:Low:K017	0.00419212
Low:Low:Low:K027	0.0791978
Low:Low:Low:K025	0.0292176
Low:Low:Low:K026	0.0508564
Low:Low:Low:K024	0.0492132
Low:Low:Low:K017	0.0224248
Low:Low:Low:K027	0.0623099
Low:Low:Low:K025	0.0742118
Low:Low:Low:K026	0.0701978
Low:Low:Low:K024	0.0729625
Low:Low:Low:K027	0.0704135
Low:Low:Low:K017	0.0622811
Low:Low:Low:K025	0.0187852
Low:Low:Low:K024	0.0219693
Low:Low:Low:K026	0.0104946
Low:Low:Low:K027	0.0178016
Low:Low:Low:K017	0.0173723
Low:Low:Low:K017	0.0717453
Low:Low:Low:K027	0.0674954
Low:Low:Low:K025	0.036273
Low:Low:Low:K026	0.0568652
Low:Low:Low:K024	0.0432733
Low:Low:Low:K025	0.0506133
Low:Low:Low:K024	0.0818047
Low:Low:Low:K026	0.055881
Low:Low:Low:K017	0.0833555
Low:Low:Low:K027	0.0701723
Low:Low:Low:K024	0.113783
Low:Low:Low:K025	0.101401
Low:Low:Low:K026	0.130461
Low:Low:Low:K017	0.0928738
Low:Low:Low:K027	0.444552
Low:Low:Low:K027	0.0830373
Low:Low:Low:K017	0.0457972
Low:Low:Low:K025	0.0470446
Low:Low:Low:K024	0.0596241
Low:Low:Low:K026	0.0237344
Low:Low:Low:K027	0.0612138
Low:Low:Low:K017	0.0596337
Low:Low:Low:K024	0.0445603
Low:Low:Low:K025	0.0244587
Low:Low:Low:K026	0.0376638
Low:Low:Low:K027	0.240846
Low:Low:Low:K017	0.129203
Low:Low:Low:K024	0.0989631
Low:Low:Low:K025	0.0924461
Low:Low:Low:K026	0.0787673
Low:Low:Low:K026	0.0992055
Low:Low:Low:K025	0.0378021
Low:Low:Low:K024	0.0309363
Low:Low:Low:K017	0.0567233
Low:Low:Low:K027	0.0814837
Low:Low:Low:K027	0.0695517
Low:Low:Low:K017	0.0559324
Low:Low:Low:K026	0.0508888
Low:Low:Low:K025	0.0535091
Low:Low:Low:K024	0.0872441
Low:Low:Low:K025	0.0469473
Low:Low:Low:K026	0.041173
Low:Low:Low:K024	0.0787523
Low:Low:Low:K027	0.0679365
Low:Low:Low:K017	0.0577558
Low:Low:Low:K027	0.0660214
Low:Low:Low:K017	0.0395916
Low:Low:Low:K024	0.043095
Low:Low:Low:K025	0.0466791
Low:Low:Low:K026	0.0396372
Low:Low:Low:K025	0.059625
Low:Low:Low:K024	0.0732942
Low:Low:Low:K026	0.0665204
Low:Low:Low:K017	0.0520622
Low:Low:Low:K027	0.103952
Low:Low:Low:K025	0.0446463
Low:Low:Low:K024	0.0725647
Low:Low:Low:K026	0.0449411
Low:Low:Low:K017	0.054336
Low:Low:Low:K027	0.0468907
Low:Low:Low:K024	0.0277463
Low:Low:Low:K025	0.0193468
Low:Low:Low:K026	0.0183129
Low:Low:Low:K027	0.0489906
Low:Low:Low:K017	0.0208674
Low:Low:Low:K017	0.0357672
Low:Low:Low:K027	0.0824287
Low:Low:Low:K024	0.0705724
Low:Low:Low:K025	0.0397623
Low:Low:Low:K026	0.0262672
Low:Low:Low:K027	0.0632113
Low:Low:Low:K017	0.0528861
Low:Low:Low:K025	0.0552313
Low:Low:Low:K026	0.0408384
Low:Low:Low:K024	0.0483895
Low:Low:Low:K024	0.0319907
Low:Low:Low:K025	0.0286054
Low:Low:Low:K026	0.0268406
Low:Low:Low:K017	0.0259812
Low:Low:Low:K027	0.0639481
Low:Low:Low:K027	0.0907496
Low:Low:Low:K017	0.0656227
Low:Low:Low:K025	0.0577857
Low:Low:Low:K026	0.0678405
Low:Low:Low:K024	0.111717
Low:Low:Low:K024	0.0595422
Low:Low:Low:K025	0.05043
Low:Low:Low:K026	0.0451693
Low:Low:Low:K027	0.0612828
Low:Low:Low:K017	0.0594322
Low:Low:Low:K025	0.0523969
Low:Low:Low:K024	0.0494146
Low:Low:Low:K026	0.0377202
Low:Low:Low:K017	0.0350302
Low:Low:Low:K027	0.063809
Low:Low:Low:K024	0.0646829
Low:Low:Low:K025	0.0280196
Low:Low:Low:K026	0.0372761
Low:Low:Low:K017	0.0389164
Low:Low:Low:K027	0.0428042
Low:Low:Low:K017	0.0380555
Low:Low:Low:K027	0.0634607
Low:Low:Low:K025	0.0461182
Low:Low:Low:K024	0.0275352
Low:Low:Low:K026	0.0354762
Low:Low:Low:K027	0.0885519
Low:Low:Low:K017	0.103212
Low:Low:Low:K026	0.0374123
Low:Low:Low:K025	0.044229
Low:Low:Low:K024	0.108186
Low:Low:Low:K024	0.0219533
Low:Low:Low:K025	0.00882758
Low:Low:Low:K026	0.0228611
Low:Low:Low:K027	0.0196505
Low:Low:Low:K017	0.0213589
Low:Low:Low:K027	0.122118
Low:Low:Low:K017	0.0767973
Low:Low:Low:K025	0.057602
Low:Low:Low:K026	0.0477147
Low:Low:Low:K024	0.0813203
Low:Low:Low:K025	0.00854659
Low:Low:Low:K024	0.0248761
Low:Low:Low:K026	0.0250641
Low:Low:Low:K017	0.0245096
Low:Low:Low:K027	0.0421431
Low:Low:Low:K024	0.0132553
Low:Low:Low:K025	0.034212
Low:Low:Low:K026	0.00711858
Low:Low:Low:K017	0.0325501
Low:Low:Low:K027	0.104738
Low:Low:Low:K017	0.0476381
Low:Low:Low:K027	0.0558629
Low:Low:Low:K026	0.0438777
Low:Low:Low:K025	0.0472411
Low:Low:Low:K024	0.060029
Low:Low:Low:K017	0.0205283
Low:Low:Low:K027	0.0415256
Low:Low:Low:K026	0.0190955
Low:Low:Low:K025	0.0335579
Low:Low:Low:K024	0.0370189
Low:Low:Low:K024	0.0328143
Low:Low:Low:K025	0.0410675
Low:Low:Low:K026	0.00883033
Low:Low:Low:K027	0.0266399
Low:Low:Low:K017	0.0204061
Low:Low:Low:K025	0.0655484
Low:Low:Low:K024	0.0863325
Low:Low:Low:K026	0.0557968
Low:Low:Low:K017	0.0912064
Low:Low:Low:K027	0.107917
Low:Low:Low:K017	0.0475641
Low:Low:Low:K027	0.0402557
Low:Low:Low:K026	0.031375
Low:Low:Low:K025	0.0401103
Low:Low:Low:K024	0.064607
Low:Low:Low:K025	0.0147023
Low:Low:Low:K024	0.0141111
Low:Low:Low:K026	0.0215537
Low:Low:Low:K027	0.0460398
Low:Low:Low:K017	0.0155496
Low:High:High:K017	0.868059
Low:High:High:K027	0.831347
Low:High:High:K024	0.666524
Low:High:High:K025	0.857156
Low:High:High:K026	0.515432
Low:High:High:K024	0.853272
Low:High:High:K025	0.840833
Low:High:High:K026	0.370809
Low:High:High:K027	0.802213
Low:High:High:K017	0.33458
Low:High:High:K025	0.361354
Low:High:High:K024	0.215124
Low:High:High:K026	0.3061
Low:High:High:K027	0.463452
Low:High:High:K017	0.436085
Low:High:High:K024	0.717224
Low:High:High:K025	0.779001
Low:High:High:K026	0.792547
Low:High:High:K027	0.720224
Low:High:High:K017	0.648268
Low:High:High:K025	0.689736
Low:High:High:K026	0.56604
Low:High:High:K024	0.549598
Low:High:High:K017	0.713955
Low:High:High:K027	0.819979
Low:High:High:K017	0.75113
Low:High:High:K027	0.849055
Low:High:High:K025	0.822785
Low:High:High:K026	0.755256
Low:High:High:K024	0.89207
Low:High:High:K017	0.837506
Low:High:High:K027	0.758001
Low:High:High:K024	0.791026
Low:High:High:K025	0.592792
Low:High:High:K026	0.731967
Low:High:High:K025	0.886752
Low:High:High:K024	0.664247
Low:High:High:K026	0.852819
Low:High:High:K017	0.91078
Low:High:High:K027	0.900035
Low:High:High:K017	0.894981
Low:High:High:K027	0.868703
Low:High:High:K025	0.879887
Low:High:High:K026	0.808257
Low:High:High:K024	0.853706
Low:High:High:K025	0.85212
Low:High:High:K026	0.768321
Low:High:High:K024	0.860484
Low:High:High:K027	0.78319
Low:High:High:K017	0.680002
Low:High:High:K017	0.798891
Low:High:High:K027	0.847246
Low:High:High:K024	0.163555
Low:High:High:K025	0.442175
Low:High:High:K026	0.131818
Low:High:High:K027	0.292901
Low:High:High:K017	0.177642
Low:High:High:K026	0.20064
Low:High:High:K025	0.264171
Low:High:High:K024	0.286304
Low:High:High:K027	0.775215
Low:High:High:K017	0.712685
Low:High:High:K025	0.713526
Low:High:High:K026	0.550644
Low:High:High:K024	0.352622
Low:High:High:K025	0.649994
Low:High:High:K024	0.253452
Low:High:High:K026	0.489744
Low:High:High:K017	0.677789
Low:High:High:K027	0.793474
Low:High:High:K024	0.565592
Low:High:High:K025	0.742052
Low:High:High:K026	0.68077
Low:High:High:K027	0.747055
Low:High:High:K017	0.693957
Low:High:High:K025	0.60947
Low:High:High:K026	0.189143
Low:High:High:K024	0.27251
Low:High:High:K027	0.452243
Low:High:High:K017	0.309921
Low:High:High:K017	0.663604
Low:High:High:K027	0.593671
Low:High:High:K025	0.468935
Low:High:High:K024	0.36764
Low:High:High:K026	0.350983
Low:High:High:K024	0.935799
Low:High:High:K025	0.879968
Low:High:High:K026	0.84037
Low:High:High:K017	0.879551
Low:High:High:K027	0.73394
Low:High:High:K027	0.338467
Low:High:High:K017	0.285921
Low:High:High:K024	0.439061
Low:High:High:K025	0.267237
Low:High:High:K026	0.107983
Low:High:High:K026	0.837602
Low:High:High:K025	0.82796
Low:High:High:K024	0.866458
Low:High:High:K027	0.924591
Low:High:High:K017	0.900931
Low:High:High:K027	0.780145
Low:High:High:K017	0.62098
Low:High:High:K025	0.650713
Low:High:High:K026	0.599726
Low:High:High:K024	0.558433
Low:High:High:K017	0.785349
Low:High:High:K027	0.838178
Low:High:High:K025	0.715714
Low:High:High:K024	0.6107
Low:High:High:K026	0.855302
Low:High:High:K017	0.814948
Low:High:High:K027	0.800804
Low:High:High:K025	0.678106
Low:High:High:K024	0.418428
Low:High:High:K026	0.734856
Low:High:High:K025	0.588269
Low:High:High:K026	0.642952
Low:High:High:K024	0.827637
Low:High:High:K017	0.834014
Low:High:High:K027	0.709838
Low:High:High:K017	0.682131
Low:High:High:K027	0.685393
Low:High:High:K026	0.529394
Low:High:High:K025	0.517324
Low:High:High:K024	0.582161
Low:High:High:K025	0.283795
Low:High:High:K026	0.235683
Low:High:High:K024	0.517893
Low:High:High:K017	0.190815
Low:High:High:K027	0.321432
Low:High:High:K024	0.755855
Low:High:High:K025	0.783523
Low:High:High:K026	0.827695
Low:High:High:K027	0.801324
Low:High:High:K017	0.725486
Low:High:High:K027	0.503213
Low:High:High:K017	0.575263
Low:High:High:K025	0.58545
Low:High:High:K024	0.509267
Low:High:High:K026	0.555311
Low:High:High:K024	0.745765
Low:High:High:K025	0.778467
Low:High:High:K026	0.797107
Low:High:High:K017	0.71368
Low:High:High:K027	0.769855
Low:High:High:K025	0.820341
Low:High:High:K026	0.24449
Low:High:High:K024	0.556873
Low:High:High:K017	0.795154
Low:High:High:K027	0.685758
Low:High:High:K025	0.711902
Low:High:High:K024	0.223525
Low:High:High:K026	0.421673
Low:High:High:K027	0.331571
Low:High:High:K017	0.324508
Low:High:High:K024	0.922175
Low:High:High:K025	0.938146
Low:High:High:K026	0.909017
Low:High:High:K027	0.945139
Low:High:High:K017	0.936821
Low:High:High:K025	0.387548
Low:High:High:K026	0.6408
Low:High:High:K024	0.466144
Low:High:High:K017	0.300962
Low:High:High:K027	0.407687
Low:High:High:K025	0.5712
Low:High:High:K024	0.565515
Low:High:High:K026	0.44911
Low:High:High:K027	0.720707
Low:High:High:K017	0.435968
Low:High:High:K017	0.549938
Low:High:High:K027	0.629719
Low:High:High:K025	0.761728
Low:High:High:K026	0.387598
Low:High:High:K024	0.218865
Low:High:High:K027	0.787499
Low:High:High:K017	0.541008
Low:High:High:K026	0.569042
Low:High:High:K025	0.63884
Low:High:High:K024	0.531388
Low:High:High:K017	0.820261
Low:High:High:K027	0.843252
Low:High:High:K025	0.836233
Low:High:High:K024	0.877637
Low:High:High:K026	0.812826
Low:High:High:K025	0.622446
Low:High:High:K026	0.484349
Low:High:High:K024	0.36042
Low:High:High:K027	0.700009
Low:High:High:K017	0.648744
Low:High:High:K017	0.416611
Low:High:High:K027	0.525064
Low:High:High:K026	0.473846
Low:High:High:K025	0.436372
Low:High:High:K024	0.30628
Low:High:High:K025	0.615354
Low:High:High:K024	0.79448
Low:High:High:K026	0.8083
Low:High:High:K027	0.75226
Low:High:High:K017	0.790178
Low:High:High:K027	0.777742
Low:High:High:K017	0.734905
Low:High:High:K025	0.572678
Low:High:High:K026	0.460138
Low:High:High:K024	0.60691
Low:High:High:K025	0.856007
Low:High:High:K024	0.464366
Low:High:High:K026	0.807059
Low:High:High:K027	0.895856
Low:High:High:K017	0.816489
Low:High:High:K024	0.702235
Low:High:High:K025	0.75296
Low:High:High:K026	0.409062
Low:High:High:K017	0.578137
Low:High:High:K027	0.60932
Low:High:High:K027	0.978946
Low:High:High:K017	0.853887
Low:High:High:K026	0.832278
Low:High:High:K025	0.871792
Low:High:High:K024	0.549741
Low:High:High:K017	0.677043
Low:High:High:K027	0.895865
Low:High:High:K025	0.878224
Low:High:High:K026	0.881119
Low:High:High:K024	0.837368
Low:High:High:K017	0.890391
Low:High:High:K027	0.861983
Low:High:High:K025	0.918801
Low:High:High:K024	0.842311
Low:High:High:K026	0.917981
Low:High:High:K027	0.905904
Low:High:High:K017	0.981479
Low:High:High:K024	0.877071
Low:High:High:K025	0.79455
Low:High:High:K026	0.848489
Low:High:High:K025	0.585777
Low:High:High:K024	0.549244
Low:High:High:K026	0.357657
Low:High:High:K017	0.607065
Low:High:High:K027	0.735161
Low:High:High:K027	0.86572
Low:High:High:K017	0.885044
Low:High:High:K026	0.836259
Low:High:High:K025	0.894602
Low:High:High:K024	0.884868
Low:High:High:K027	0.819464
Low:High:High:K017	0.829991
Low:High:High:K025	0.866189
Low:High:High:K026	0.900683
Low:High:High:K024	0.89778
Low:High:High:K017	0.407814
Low:High:High:K027	0.409011
Low:High:High:K026	0.589901
Low:High:High:K025	0.379162
Low:High:High:K024	0.414858
Low:High:High:K025	0.760093
Low:High:High:K024	0.763011
Low:High:High:K026	0.773659
Low:High:High:K027	0.727487
Low:High:High:K017	0.682379
Low:High:High:K025	0.662428
Low:High:High:K026	0.721711
Low:High:High:K024	0.485135
Low:High:High:K017	0.67448
Low:High:High:K027	0.865413
Low:High:High:K025	0.483437
Low:High:High:K026	0.430756
Low:High:High:K024	0.703334
Low:High:High:K017	0.297852
Low:High:High:K027	0.594347
Low:High:High:K025	0.430249
Low:High:High:K024	0.179029
Low:High:High:K026	0.643789
Low:High:High:K017	0.306559
Low:High:High:K027	0.384449
Low:High:High:K026	0.828009
Low:High:High:K025	0.860582
Low:High:High:K024	0.87069
Low:High:High:K017	0.83048
Low:High:High:K027	0.633836
Low:High:High:K017	0.285078
Low:High:High:K027	0.84433
Low:High:High:K024	0.28877
Low:High:High:K025	0.563273
Low:High:High:K026	0.770642
Low:High:High:K017	0.59721
Low:High:High:K027	0.694337
Low:High:High:K024	0.379825
Low:High:High:K025	0.710795
Low:High:High:K026	0.533798
Low:High:High:K025	0.600242
Low:High:High:K024	0.134681
Low:High:High:K026	0.138442
Low:High:High:K017	0.226916
Low:High:High:K027	0.513494
Low:High:High:K024	0.340303
Low:High:High:K025	0.427687
Low:High:High:K026	0.528824
Low:High:High:K027	0.766584
Low:High:High:K017	0.616005
Low:High:High:K025	0.801806
Low:High:High:K026	0.840515
Low:High:High:K024	0.82725
Low:High:High:K027	0.878477
Low:High:High:K017	0.818571
Low:High:High:K025	0.955979
Low:High:High:K024	0.917385
Low:High:High:K026	0.927249
Low:High:High:K017	0.908176
Low:High:High:K027	0.951966
Low:High:High:K017	0.805014
Low:High:High:K027	0.866044
Low:High:High:K024	0.703912
Low:High:High:K025	0.787163
Low:High:High:K026	0.591201
Low:High:High:K017	0.454182
Low:High:High:K027	0.705728
Low:High:High:K025	0.590683
Low:High:High:K024	0.600924
Low:High:High:K026	0.510368
Low:High:High:K026	0.701154
Low:High:High:K025	0.50731
Low:High:High:K024	0.397476
Low:High:High:K017	0.845405
Low:High:High:K027	0.865208
Low:High:High:K027	0.653305
Low:High:High:K017	0.738694
Low:High:High:K026	0.752667
Low:High:High:K025	0.781236
Low:High:High:K024	0.610963
Low:High:High:K025	0.810026
Low:High:High:K026	0.792219
Low:High:High:K024	0.572499
Low:High:High:K017	0.725478
Low:High:High:K027	0.789918
Low:High:High:K027	0.695041
Low:High:High:K017	0.456813
Low:High:High:K026	0.659295
Low:High:High:K025	0.643563
Low:High:High:K024	0.59417
Low:High:High:K024	0.87053
Low:High:High:K025	0.827394
Low:High:High:K026	0.936512
Low:High:High:K027	0.8058
Low:High:High:K017	0.896185
Low:High:High:K027	0.705499
Low:High:High:K017	0.787963
Low:High:High:K024	0.689847
Low:High:High:K025	0.713994
Low:High:High:K026	0.886726
Low:High:High:K027	0.882075
Low:High:High:K017	0.89266
Low:High:High:K026	0.634608
Low:High:High:K025	0.857639
Low:High:High:K024	0.574158
Low:High:High:K017	0.35274
Low:High:High:K027	0.526193
Low:High:High:K024	0.51546
Low:High:High:K025	0.386108
Low:High:High:K026	0.389914
Low:High:High:K024	0.681554
Low:High:High:K025	0.865449
Low:High:High:K026	0.415737
Low:High:High:K017	0.783594
Low:High:High:K027	0.890431
Low:High:High:K027	0.536839
Low:High:High:K017	0.532347
Low:High:High:K025	0.44327
Low:High:High:K026	0.3315
Low:High:High:K024	0.556902
Low:High:High:K026	0.532982
Low:High:High:K025	0.768619
Low:High:High:K024	0.598248
Low:High:High:K017	0.466356
Low:High:High:K027	0.761966
Low:High:High:K025	0.579039
Low:High:High:K024	0.369815
Low:High:High:K026	0.452763
Low:High:High:K017	0.55916
Low:High:High:K027	0.691533
Low:High:High:K025	0.382512
Low:High:High:K026	0.711482
Low:High:High:K024	0.75431
Low:High:High:K027	0.311534
Low:High:High:K017	0.518811
Low:High:High:K025	0.221293
Low:High:High:K026	0.442555
Low:High:High:K024	0.576335
Low:High:High:K027	0.580076
Low:High:High:K017	0.474307
Low:High:High:K025	0.737422
Low:High:High:K026	0.806263
Low:High:High:K024	0.682378
Low:High:High:K027	0.746786
Low:High:High:K017	0.750108
Low:High:High:K027	0.831492
Low:High:High:K017	0.714127
Low:High:High:K025	0.683334
Low:High:High:K026	0.511663
Low:High:High:K024	0.751872
Low:High:High:K017	0.394819
Low:High:High:K027	0.728154
Low:High:High:K026	0.691272
Low:High:High:K025	0.687831
Low:High:High:K024	0.802406
Low:High:High:K024	0.542277
Low:High:High:K025	0.578743
Low:High:High:K026	0.633304
Low:High:High:K027	0.657778
Low:High:High:K017	0.733263
Low:High:High:K017	0.221099
Low:High:High:K027	0.473766
Low:High:High:K025	0.448262
Low:High:High:K026	0.26298
Low:High:High:K024	0.286205
Low:High:High:K027	0.371071
Low:High:High:K017	0.69268
Low:High:High:K025	0.701701
Low:High:High:K026	0.620543
Low:High:High:K024	0.856599
Low:High:High:K025	0.581741
Low:High:High:K024	0.615024
Low:High:High:K026	0.807959
Low:High:High:K027	0.607153
Low:High:High:K017	0.547418
Low:High:High:K027	0.191501
Low:High:High:K017	0.561849
Low:High:High:K025	0.626243
Low:High:High:K024	0.407824
Low:High:High:K026	0.435506
Low:High:High:K027	0.693558
Low:High:High:K017	0.869725
Low:High:High:K025	0.647665
Low:High:High:K026	0.557238
Low:High:High:K024	0.777385
Low:High:High:K025	0.469537
Low:High:High:K026	0.548618
Low:High:High:K024	0.630006
Low:High:High:K017	0.664378
Low:High:High:K027	0.695143
Low:High:High:K024	0.123789
Low:High:High:K025	0.181933
Low:High:High:K026	0.494633
Low:High:High:K017	0.328986
Low:High:High:K027	0.303153
Low:High:High:K017	0.46136
Low:High:High:K027	0.185401
Low:High:High:K025	0.632363
Low:High:High:K026	0.428769
Low:High:High:K024	0.279611
Low:High:High:K026	0.598203
Low:High:High:K025	0.462548
Low:High:High:K024	0.653298
Low:High:High:K017	0.643136
Low:High:High:K027	0.638422
Low:High:High:K017	0.410767
Low:High:High:K027	0.638611
Low:High:High:K026	0.518972
Low:High:High:K025	0.561326
Low:High:High:K024	0.532595
Low:High:High:K027	0.302791
Low:High:High:K017	0.420684
Low:High:High:K025	0.632139
Low:High:High:K024	0.625026
Low:High:High:K026	0.663927
Low:High:High:K026	0.33492
Low:High:High:K025	0.371398
Low:High:High:K024	0.346937
Low:High:High:K027	0.481208
Low:High:High:K017	0.319839
Low:High:High:K017	0.857164
Low:High:High:K027	0.93035
Low:High:High:K024	0.808147
Low:High:High:K025	0.88574
Low:High:High:K026	0.811547
Low:High:High:K017	0.880362
Low:High:High:K027	0.883605
Low:High:High:K025	0.881015
Low:High:High:K026	0.515186
Low:High:High:K024	0.911334
Low:High:High:K026	0.121706
Low:High:High:K025	0.326128
Low:High:High:K024	0.17538
Low:High:High:K027	0.408931
Low:High:High:K017	0.278935
Low:High:High:K017	0.784167
Low:High:High:K027	0.829501
Low:High:High:K025	0.881103
Low:High:High:K024	0.807139
Low:High:High:K026	0.284452
Low:High:High:K027	0.274159
Low:High:High:K017	0.357763
Low:High:High:K024	0.294746
Low:High:High:K025	0.370239
Low:High:High:K026	0.45468
Low:High:High:K017	0.638432
Low:High:High:K027	0.78542
Low:High:High:K025	0.698986
Low:High:High:K026	0.479765
Low:High:High:K024	0.783605
Low:High:High:K024	0.921226
Low:High:High:K025	0.859952
Low:High:High:K026	0.865699
Low:High:High:K027	0.891402
Low:High:High:K017	0.851202
Low:High:High:K025	0.843067
Low:High:High:K026	0.880816
Low:High:High:K024	0.800854
Low:High:High:K027	0.876541
Low:High:High:K017	0.884678
Low:High:High:K027	0.76781
Low:High:High:K017	0.540506
Low:High:High:K025	0.552015
Low:High:High:K026	0.715845
Low:High:High:K024	0.491
Low:High:High:K027	0.624217
Low:High:High:K017	0.511757
Low:High:High:K024	0.490532
Low:High:High:K025	0.551651
Low:High:High:K026	0.581792
Low:High:High:K027	0.668925
Low:High:High:K017	0.720848
Low:High:High:K025	0.769249
Low:High:High:K024	0.749874
Low:High:High:K026	0.727223
Low:High:High:K025	0.860306
Low:High:High:K024	0.850316
Low:High:High:K026	0.875199
Low:High:High:K027	0.74143
Low:High:High:K017	0.792311
Low:High:High:K017	0.760229
Low:High:High:K027	0.822056
Low:High:High:K025	0.805578
Low:High:High:K026	0.861077
Low:High:High:K024	0.86837
Low:High:High:K025	0.796708
Low:High:High:K024	0.771041
Low:High:High:K026	0.873134
Low:High:High:K027	0.718938
Low:High:High:K017	0.55682
Low:High:High:K027	0.860583
Low:High:High:K017	0.817161
Low:High:High:K025	0.834218
Low:High:High:K026	0.829941
Low:High:High:K024	0.868682
Low:High:High:K025	0.364717
Low:High:High:K026	0.348482
Low:High:High:K024	0.56214
Low:High:High:K027	0.250165
Low:High:High:K017	0.25877
Low:High:High:K017	0.735822
Low:High:High:K027	0.803244
Low:High:High:K024	0.723266
Low:High:High:K025	0.708934
Low:High:High:K026	0.552769
Low:High:High:K027	0.804762
Low:High:High:K017	0.917848
Low:High:High:K024	0.899416
Low:High:High:K025	0.898613
Low:High:High:K026	0.921781
Low:High:High:K017	0.819822
Low:High:High:K027	0.907383
Low:High:High:K025	0.832368
Low:High:High:K026	0.758091
Low:High:High:K024	0.892684
Low:High:High:K025	0.839987
Low:High:High:K026	0.830304
Low:High:High:K024	0.778165
Low:High:High:K027	0.878517
Low:High:High:K017	0.808528
Low:High:High:K025	0.570354
Low:High:High:K026	0.456352
Low:High:High:K024	0.679719
Low:High:High:K017	0.473306
Low:High:High:K027	0.76187
Low:High:High:K024	0.64643
Low:High:High:K025	0.727094
Low:High:High:K026	0.748204
Low:High:High:K017	0.752635
Low:High:High:K027	0.689269
Low:High:High:K017	0.754502
Low:High:High:K027	0.939113
Low:High:High:K025	0.930994
Low:High:High:K026	0.93985
Low:High:High:K024	0.949437
Low:High:High:K025	0.894012
Low:High:High:K026	0.879859
Low:High:High:K024	0
Low:High:High:K027	0.870492
Low:High:High:K017	0.938634
Low:High:High:K017	0.912577
Low:High:High:K027	0.868517
Low:High:High:K026	0.827445
Low:High:High:K025	0.889733
Low:High:High:K024	0.863579
Low:High:High:K024	0.295536
Low:High:High:K025	0.684876
Low:High:High:K026	0.747224
Low:High:High:K027	0.722514
Low:High:High:K017	0.723155
Low:High:High:K025	0.436226
Low:High:High:K026	0.306245
Low:High:High:K024	0.477565
Low:High:High:K017	0.367277
Low:High:High:K027	0.571397
Low:High:High:K026	0.402155
Low:High:High:K025	0.928331
Low:High:High:K024	0.592018
Low:High:High:K027	0.775641
Low:High:High:K017	0.708358
Low:High:High:K025	0.785863
Low:High:High:K026	0.666682
Low:High:High:K024	0.576034
Low:High:High:K027	0.799586
Low:High:High:K017	0.728187
Low:High:High:K017	0.902673
Low:High:High:K027	0.888863
Low:High:High:K025	0.906618
Low:High:High:K026	0.374327
Low:High:High:K024	0.913911
Low:High:High:K024	0.536903
Low:High:High:K025	0.6941
Low:High:High:K026	0.598619
Low:High:High:K017	0.747727
Low:High:High:K027	0.83751
Low:High:High:K025	0.693002
Low:High:High:K026	0.637213
Low:High:High:K024	0.70501
Low:High:High:K017	0.803366
Low:High:High:K027	0.832298
Low:High:High:K026	0.810065
Low:High:High:K025	0.951575
Low:High:High:K024	0.74477
Low:High:High:K017	0.680007
Low:High:High:K027	0.907111
Low:High:High:K026	0.250052
Low:High:High:K025	0.823031
Low:High:High:K024	0.754887
Low:High:High:K027	0.811405
Low:High:High:K017	0.494324
Low:High:High:K025	0.674279
Low:High:High:K026	0.416054
Low:High:High:K024	0.62826
Low:High:High:K027	0.802548
Low:High:High:K017	0.566239
Low:High:High:K025	0.540974
Low:High:High:K026	0.286275
Low:High:High:K024	0.286582
Low:High:High:K017	0.245703
Low:High:High:K027	0.54452
Low:High:High:K024	0.8782
Low:High:High:K025	0.834492
Low:High:High:K026	0.669803
Low:High:High:K017	0.720543
Low:High:High:K027	0.674254
Low:High:High:K026	0.180878
Low:High:High:K025	0.306608
Low:High:High:K024	0.738218
Low:High:High:K017	0.40097
Low:High:High:K027	0.799945
Low:High:High:K025	0.415872
Low:High:High:K026	0.822209
Low:High:High:K024	0.154886
Low:High:High:K027	0.838707
Low:High:High:K017	0.824817
Low:High:High:K027	0.349465
Low:High:High:K017	0.470448
Low:High:High:K025	0.503373
Low:High:High:K026	0.292375
Low:High:High:K024	0.575421
Low:High:High:K017	0.705572
Low:High:High:K027	0.846836
Low:High:High:K026	0.515255
Low:High:High:K025	0.489309
Low:High:High:K024	0.466036
Low:High:High:K027	0.802768
Low:High:High:K017	0.783335
Low:High:High:K025	0.828235
Low:High:High:K026	0.858371
Low:High:High:K024	0.795449
Low:High:High:K025	0.844696
Low:High:High:K024	0.891608
Low:High:High:K026	0.716281
Low:High:High:K027	0.770867
Low:High:High:K017	0.702499
Low:High:High:K027	0.895677
Low:High:High:K017	0.724217
Low:High:High:K025	0.865383
Low:High:High:K026	0.929393
Low:High:High:K024	0.824567
Low:High:High:K027	0.832138
Low:High:High:K017	0.900504
Low:High:High:K025	0.628763
Low:High:High:K024	0.809408
Low:High:High:K026	0.476511
Low:High:High:K025	0.620962
Low:High:High:K024	0.611706
Low:High:High:K026	0.293723
Low:High:High:K017	0.701005
Low:High:High:K027	0.704379
Low:High:High:K017	0.781853
Low:High:High:K027	0.746782
Low:High:High:K025	0.775346
Low:High:High:K024	0.803444
Low:High:High:K026	0.726957
Low:High:High:K017	0.887065
Low:High:High:K027	0.938318
Low:High:High:K025	0.882563
Low:High:High:K026	0.886539
Low:High:High:K024	0.712408
Low:High:High:K027	0.65481
Low:High:High:K017	0.564427
Low:High:High:K026	0.448798
Low:High:High:K025	0.681168
Low:High:High:K024	0.439632
Low:High:High:K025	0.532713
Low:High:High:K026	0.25681
Low:High:High:K024	0.318463
Low:High:High:K017	0.606235
Low:High:High:K027	0.627659
Low:High:High:K027	0.617162
Low:High:High:K017	0.709963
Low:High:High:K025	0.779119
Low:High:High:K026	0.796675
Low:High:High:K024	0.493379
Low:High:High:K017	0.825113
Low:High:High:K027	0.764513
Low:High:High:K024	0.886956
Low:High:High:K025	0.814776
Low:High:High:K026	0.649312
Low:High:High:K017	0.50348
Low:High:High:K027	0.569033
Low:High:High:K024	0.512763
Low:High:High:K025	0.502487
Low:High:High:K026	0.469238
Low:High:High:K027	0.643262
Low:High:High:K017	0.220057
Low:High:High:K025	0.544851
Low:High:High:K024	0.480423
Low:High:High:K026	0.175854
Low:High:High:K025	0.458824
Low:High:High:K026	0.740502
Low:High:High:K024	0.867087
Low:High:High:K027	0.595128
Low:High:High:K017	0.658714
Low:High:High:K025	0.871841
Low:High:High:K026	0.864589
Low:High:High:K024	0.835608
Low:High:High:K017	0.882653
Low:High:High:K027	0.952245
Low:High:High:K027	0.840307
Low:High:High:K017	0.761913
Low:High:High:K025	0.889511
Low:High:High:K026	0.701232
Low:High:High:K024	0.795306
Low:High:High:K027	0.762453
Low:High:High:K017	0.684537
Low:High:High:K024	0.786892
Low:High:High:K025	0.780925
Low:High:High:K026	0.627499
Low:High:High:K017	0.279896
Low:High:High:K027	0.472637
Low:High:High:K025	0.45094
Low:High:High:K024	0.366281
Low:High:High:K026	0.451472
Low:High:High:K017	0.462775
Low:High:High:K027	0.548805
Low:High:High:K025	0.501872
Low:High:High:K026	0.457732
Low:High:High:K024	0.596781
Low:High:Low:K027	0.425847
Low:High:Low:K017	0.105381
Low:High:Low:K024	0.138563
Low:High:Low:K025	0.0782805
Low:High:Low:K026	0.0592779
Low:High:Low:K026	0.0884397
Low:High:Low:K025	0.125175
Low:High:Low:K024	0.242722
Low:High:Low:K027	0.344333
Low:High:Low:K017	0.143283
Low:High:Low:K017	0.359612
Low:High:Low:K027	0.58083
Low:High:Low:K026	0.314361
Low:High:Low:K025	0.36885
Low:High:Low:K024	0.378566
Low:High:Low:K025	0.209731
Low:High:Low:K026	0.170625
Low:High:Low:K024	0.383474
Low:High:Low:K017	0.241956
Low:High:Low:K027	0.775384
Low:High:Low:K024	0.316578
Low:High:Low:K025	0.340919
Low:High:Low:K026	0.244289
Low:High:Low:K027	0.495644
Low:High:Low:K017	0.400559
Low:High:Low:K017	0.104387
Low:High:Low:K027	0.363765
Low:High:Low:K025	0.0959222
Low:High:Low:K024	0.23242
Low:High:Low:K026	0.0638575
Low:High:Low:K025	0.0989973
Low:High:Low:K026	0.0806447
Low:High:Low:K024	0.177297
Low:High:Low:K017	0.120592
Low:High:Low:K027	0.188981
Low:High:Low:K025	0.242581
Low:High:Low:K026	0.134775
Low:High:Low:K024	0.118474
Low:High:Low:K027	0.395237
Low:High:Low:K017	0.206595
Low:High:Low:K027	0.478727
Low:High:Low:K017	0.147457
Low:High:Low:K025	0.0974799
Low:High:Low:K024	0.190633
Low:High:Low:K026	0.172272
Low:High:Low:K027	0.185501
Low:High:Low:K017	0.145629
Low:High:Low:K024	0.150593
Low:High:Low:K025	0.163831
Low:High:Low:K026	0.0754135
Low:High:Low:K025	0.0800327
Low:High:Low:K024	0.116148
Low:High:Low:K026	0.0414676
Low:High:Low:K027	0.113284
Low:High:Low:K017	0.0572066
Low:High:Low:K017	0.239263
Low:High:Low:K027	0.347228
Low:High:Low:K025	0.358985
Low:High:Low:K024	0.309949
Low:High:Low:K026	0.213087
Low:High:Low:K017	0.267812
Low:High:Low:K027	0.475413
Low:High:Low:K025	0.179152
Low:High:Low:K026	0.0788001
Low:High:Low:K024	0.103996
Low:High:Low:K017	0.121921
Low:High:Low:K027	0.235368
Low:High:Low:K025	0.108127
Low:High:Low:K024	0.0754769
Low:High:Low:K026	0.0799425
Low:High:Low:K027	0.718807
Low:High:Low:K017	0.248172
Low:High:Low:K026	0.103976
Low:High:Low:K025	0.23506
Low:High:Low:K024	0.314151
Low:High:Low:K017	0.103076
Low:High:Low:K027	0.187109
Low:High:Low:K024	0.120909
Low:High:Low:K025	0.112112
Low:High:Low:K026	0.0697595
Low:High:Low:K026	0.090598
Low:High:Low:K025	0.138496
Low:High:Low:K024	0.13401
Low:High:Low:K027	0.267251
Low:High:Low:K017	0.142679
Low:High:Low:K025	0.0567636
Low:High:Low:K026	0.0681687
Low:High:Low:K024	0.113424
Low:High:Low:K017	0.0926292
Low:High:Low:K027	0.212344
Low:High:Low:K026	0.233132
Low:High:Low:K025	0.0791215
Low:High:Low:K024	0.102388
Low:High:Low:K017	0.0977236
Low:High:Low:K027	0.381262
Low:High:Low:K017	0.156658
Low:High:Low:K027	0.410392
Low:High:Low:K026	0.101402
Low:High:Low:K025	0.108917
Low:High:Low:K024	0.100215
Low:High:Low:K017	0.133209
Low:High:Low:K027	0.112789
Low:High:Low:K025	0.101608
Low:High:Low:K024	0.181938
Low:High:Low:K026	0.0991661
Low:High:Low:K017	0.0903199
Low:High:Low:K027	0.252268
Low:High:Low:K024	0.0856691
Low:High:Low:K025	0.088315
Low:High:Low:K026	0.0416729
Low:High:Low:K024	0.257506
Low:High:Low:K025	0.129183
Low:High:Low:K026	0.151247
Low:High:Low:K027	0.367589
Low:High:Low:K017	0.26407
Low:High:Low:K017	0.210128
Low:High:Low:K027	0.315342
Low:High:Low:K025	0.195245
Low:High:Low:K026	0.160534
Low:High:Low:K024	0.168359
Low:High:Low:K027	0.414424
Low:High:Low:K017	0.0781915
Low:High:Low:K026	0.106584
Low:High:Low:K025	0.0643905
Low:High:Low:K024	0.105605
Low:High:Low:K017	0.131186
Low:High:Low:K027	0.145391
Low:High:Low:K024	0.167043
Low:High:Low:K025	0.109733
Low:High:Low:K026	0.104682
Low:High:Low:K017	0.0644312
Low:High:Low:K027	0.223972
Low:High:Low:K024	0.132399
Low:High:Low:K025	0.0674591
Low:High:Low:K026	0.0578946
Low:High:Low:K017	0.156194
Low:High:Low:K027	0.245066
Low:High:Low:K025	0.19606
Low:High:Low:K024	0.171923
Low:High:Low:K026	0.0734858
Low:High:Low:K025	0.334998
Low:High:Low:K024	0.266169
Low:High:Low:K026	0.0992571
Low:High:Low:K027	0.372456
Low:High:Low:K017	0.217979
Low:High:Low:K024	0.132847
Low:High:Low:K025	0.406343
Low:High:Low:K026	0.190883
Low:High:Low:K027	0.233274
Low:High:Low:K017	0.27125
Low:High:Low:K025	0.264874
Low:High:Low:K024	0.241778
Low:High:Low:K026	0.169753
Low:High:Low:K027	0.344571
Low:High:Low:K017	0.181193
Low:High:Low:K017	0.136376
Low:High:Low:K027	0.611116
Low:High:Low:K025	0.183905
Low:High:Low:K024	0.189747
Low:High:Low:K026	0.163699
Low:High:Low:K025	0.0532173
Low:High:Low:K026	0.0209263
Low:High:Low:K024	0.0628291
Low:High:Low:K027	0.464266
Low:High:Low:K017	0.0825093
Low:High:Low:K025	0.572343
Low:High:Low:K024	0.572072
Low:High:Low:K026	0.142678
Low:High:Low:K027	0.797619
Low:High:Low:K017	0.725572
Low:High:Low:K024	0.0979329
Low:High:Low:K025	0.107428
Low:High:Low:K026	0.0618687
Low:High:Low:K017	0.171681
Low:High:Low:K027	0.429715
Low:High:Low:K017	0.137158
Low:High:Low:K027	0.242482
Low:High:Low:K026	0.0321344
Low:High:Low:K025	0.222178
Low:High:Low:K024	0.665052
Low:High:Low:K017	0.0323616
Low:High:Low:K027	0.321227
Low:High:Low:K024	0.192759
Low:High:Low:K025	0.252104
Low:High:Low:K026	0.226382
Low:High:Low:K025	0.12001
Low:High:Low:K026	0.222891
Low:High:Low:K024	0.128948
Low:High:Low:K027	0.37292
Low:High:Low:K017	0.146877
Low:High:Low:K025	0.416403
Low:High:Low:K026	0.0951569
Low:High:Low:K024	0.380304
Low:High:Low:K017	0.46556
Low:High:Low:K027	0.687213
Low:High:Low:K027	0.152946
Low:High:Low:K017	0.199598
Low:High:Low:K025	0.216145
Low:High:Low:K024	0.180514
Low:High:Low:K026	0.075802
Low:High:Low:K026	0.0656532
Low:High:Low:K025	0.0447844
Low:High:Low:K024	0.0988609
Low:High:Low:K017	0.0629072
Low:High:Low:K027	0.126386
Low:High:Low:K017	0.162368
Low:High:Low:K027	0.512082
Low:High:Low:K025	0.226573
Low:High:Low:K024	0.299358
Low:High:Low:K026	0.0465255
Low:High:Low:K024	0.090379
Low:High:Low:K025	0.0948385
Low:High:Low:K026	0.0265061
Low:High:Low:K017	0.0636164
Low:High:Low:K027	0.168862
Low:High:Low:K017	0.559844
Low:High:Low:K027	0.694459
Low:High:Low:K024	0.3932
Low:High:Low:K025	0.218235
Low:High:Low:K026	0.166201
Low:High:Low:K017	0.12391
Low:High:Low:K027	0.208368
Low:High:Low:K025	0.0633728
Low:High:Low:K026	0.0937098
Low:High:Low:K024	0.133981
Low:High:Low:K025	0.113964
Low:High:Low:K026	0.152599
Low:High:Low:K024	0.188697
Low:High:Low:K027	0.256107
Low:High:Low:K017	0.102615
Low:High:Low:K025	0.438097
Low:High:Low:K024	0.238515
Low:High:Low:K026	0.327037
Low:High:Low:K017	0.646978
Low:High:Low:K027	0.660347
Low:High:Low:K025	0.0276326
Low:High:Low:K026	0.0532795
Low:High:Low:K024	0.0821743
Low:High:Low:K017	0.0452089
Low:High:Low:K027	0.0540568
Low:High:Low:K027	0.143509
Low:High:Low:K017	0.0999437
Low:High:Low:K024	0.15681
Low:High:Low:K025	0.108507
Low:High:Low:K026	0.0840662
Low:High:Low:K027	0.414162
Low:High:Low:K017	0.196707
Low:High:Low:K026	0.349804
Low:High:Low:K025	0.604651
Low:High:Low:K024	0.332476
Low:High:Low:K024	0.120182
Low:High:Low:K025	0.198298
Low:High:Low:K026	0.200047
Low:High:Low:K027	0.465556
Low:High:Low:K017	0.257521
Low:High:Low:K017	0.212123
Low:High:Low:K027	0.280856
Low:High:Low:K024	0.500485
Low:High:Low:K025	0.256121
Low:High:Low:K026	0.130321
Low:High:Low:K024	0.183514
Low:High:Low:K025	0.0618547
Low:High:Low:K026	0.0733506
Low:High:Low:K027	0.257115
Low:High:Low:K017	0.113119
Low:High:Low:K024	0.290271
Low:High:Low:K025	0.211252
Low:High:Low:K026	0.288584
Low:High:Low:K027	0.295974
Low:High:Low:K017	0.214592
Low:High:Low:K025	0.145625
Low:High:Low:K024	0.273195
Low:High:Low:K026	0.155836
Low:High:Low:K027	0.271236
Low:High:Low:K017	0.208413
Low:High:Low:K027	0.646672
Low:High:Low:K017	0.120355
Low:High:Low:K025	0.13688
Low:High:Low:K026	0.0673812
Low:High:Low:K024	0.133328
Low:High:Low:K017	0.10218
Low:High:Low:K027	0.343164
Low:High:Low:K024	0.202196
Low:High:Low:K025	0.0545049
Low:High:Low:K026	0.0552211
Low:High:Low:K024	0.112857
Low:High:Low:K025	0.157773
Low:High:Low:K026	0.182234
Low:High:Low:K017	0.108675
Low:High:Low:K027	0.171335
Low:High:Low:K017	0.172992
Low:High:Low:K027	0.901122
Low:High:Low:K025	0.17899
Low:High:Low:K024	0.13808
Low:High:Low:K026	0.0959803
Low:High:Low:K024	0.396684
Low:High:Low:K025	0.581503
Low:High:Low:K026	0.229182
Low:High:Low:K027	0.790931
Low:High:Low:K017	0.523501
Low:High:Low:K027	0.889662
Low:High:Low:K017	0.233567
Low:High:Low:K026	0.137996
Low:High:Low:K025	0.0910853
Low:High:Low:K024	0.12073
Low:High:Low:K025	0.35883
Low:High:Low:K026	0.191138
Low:High:Low:K024	0.358829
Low:High:Low:K017	0.223852
Low:High:Low:K027	0.519021
Low:High:Low:K017	0.288907
Low:High:Low:K027	0.50256
Low:High:Low:K024	0.207561
Low:High:Low:K025	0.229557
Low:High:Low:K026	0.116946
Low:High:Low:K025	0.28886
Low:High:Low:K024	0.25542
Low:High:Low:K026	0.0689542
Low:High:Low:K027	0.497081
Low:High:Low:K017	0.165517
Low:High:Low:K026	0.0919608
Low:High:Low:K025	0.067003
Low:High:Low:K024	0.158239
Low:High:Low:K027	0.0995418
Low:High:Low:K017	0.0688361
Low:High:Low:K024	0.141421
Low:High:Low:K025	0.11974
Low:High:Low:K026	0.0401175
Low:High:Low:K017	0.118012
Low:High:Low:K027	0.200018
Low:High:Low:K027	0.200601
Low:High:Low:K017	0.112474
Low:High:Low:K026	0.0488069
Low:High:Low:K025	0.0824227
Low:High:Low:K024	0.130704
Low:High:Low:K026	0.0561206
Low:High:Low:K025	0.0841538
Low:High:Low:K024	0.130799
Low:High:Low:K017	0.102073
Low:High:Low:K027	0.134355
Low:High:Low:K027	0.633647
Low:High:Low:K017	0.624825
Low:High:Low:K025	0.420784
Low:High:Low:K026	0.359371
Low:High:Low:K024	0.238246
Low:High:Low:K017	0.151864
Low:High:Low:K027	0.199847
Low:High:Low:K025	0.227002
Low:High:Low:K026	0.26395
Low:High:Low:K024	0.172161
Low:High:Low:K017	0.0961313
Low:High:Low:K027	0.224742
Low:High:Low:K024	0.0853808
Low:High:Low:K025	0.0508666
Low:High:Low:K026	0.0469149
Low:High:Low:K017	0.147587
Low:High:Low:K027	0.198832
Low:High:Low:K026	0.244605
Low:High:Low:K025	0.0619757
Low:High:Low:K024	0.09849
Low:High:Low:K017	0.13122
Low:High:Low:K027	0.210857
Low:High:Low:K025	0.108988
Low:High:Low:K024	0.124925
Low:High:Low:K026	0.0939959
Low:High:Low:K017	0.0508182
Low:High:Low:K027	0.103827
Low:High:Low:K025	0.0291724
Low:High:Low:K026	0.0403229
Low:High:Low:K024	0.109533
Low:High:Low:K027	0.600516
Low:High:Low:K017	0.0616553
Low:High:Low:K024	0.16104
Low:High:Low:K025	0.149954
Low:High:Low:K026	0.226731
Low:High:Low:K017	0.117068
Low:High:Low:K027	0.430436
Low:High:Low:K024	0.109929
Low:High:Low:K025	0.0778938
Low:High:Low:K026	0.0772254
Low:High:Low:K025	0.109675
Low:High:Low:K026	0.0661737
Low:High:Low:K024	0.1113
Low:High:Low:K017	0.0971251
Low:High:Low:K027	0.145349
Low:High:Low:K026	0.103012
Low:High:Low:K025	0.182754
Low:High:Low:K024	0.13073
Low:High:Low:K017	0.103546
Low:High:Low:K027	0.337724
Low:High:Low:K027	0.353703
Low:High:Low:K017	0.252517
Low:High:Low:K025	0.160157
Low:High:Low:K026	0.0881371
Low:High:Low:K024	0.142246
Low:High:Low:K017	0.104123
Low:High:Low:K027	0.241151
Low:High:Low:K024	0.183321
Low:High:Low:K025	0.0774909
Low:High:Low:K026	0.0689012
Low:High:Low:K024	0.0973038
Low:High:Low:K025	0.0569029
Low:High:Low:K026	0.155855
Low:High:Low:K027	0.128985
Low:High:Low:K017	0.0913917
Low:High:Low:K026	0.114459
Low:High:Low:K025	0.0985731
Low:High:Low:K024	0.13614
Low:High:Low:K017	0.147746
Low:High:Low:K027	0.445496
Low:High:Low:K027	0.810904
Low:High:Low:K017	0.0882201
Low:High:Low:K025	0.0702232
Low:High:Low:K024	0.383805
Low:High:Low:K026	0.0999234
Low:High:Low:K017	0.0900588
Low:High:Low:K027	0.215343
Low:High:Low:K025	0.158758
Low:High:Low:K026	0.0511053
Low:High:Low:K024	0.0846006
Low:High:Low:K027	0.429526
Low:High:Low:K017	0.123465
Low:High:Low:K025	0.103948
Low:High:Low:K024	0.199142
Low:High:Low:K026	0.134915
Low:High:Low:K027	0.484311
Low:High:Low:K017	0.127587
Low:High:Low:K025	0.174369
Low:High:Low:K024	0.208616
Low:High:Low:K026	0.0651293
Low:High:Low:K017	0.279062
Low:High:Low:K027	0.303441
Low:High:Low:K024	0.324263
Low:High:Low:K025	0.238653
Low:High:Low:K026	0.177664
Low:High:Low:K025	0.211924
Low:High:Low:K024	0.230617
Low:High:Low:K026	0.182906
Low:High:Low:K027	0.378717
Low:High:Low:K017	0.243745
Low:High:Low:K026	0.128034
Low:High:Low:K025	0.16236
Low:High:Low:K024	0.146421
Low:High:Low:K027	0.290995
Low:High:Low:K017	0.213396
Low:High:Low:K017	0.069916
Low:High:Low:K027	0.261283
Low:High:Low:K025	0.0925213
Low:High:Low:K026	0.0546868
Low:High:Low:K024	0.19797
Low:High:Low:K024	0.173059
Low:High:Low:K025	0.317243
Low:High:Low:K026	0.227054
Low:High:Low:K017	0.1375
Low:High:Low:K027	0.702027
Low:High:Low:K026	0.186574
Low:High:Low:K025	0.215784
Low:High:Low:K024	0.497434
Low:High:Low:K017	0.366192
Low:High:Low:K027	0.570768
Low:High:Low:K017	0.1128
Low:High:Low:K027	0.226178
Low:High:Low:K025	0.130537
Low:High:Low:K024	0.148047
Low:High:Low:K026	0.062475
Low:High:Low:K026	0.173209
Low:High:Low:K025	0.198407
Low:High:Low:K024	0.179675
Low:High:Low:K017	0.121175
Low:High:Low:K027	0.209514
Low:High:Low:K017	0.16226
Low:High:Low:K027	0.225167
Low:High:Low:K025	0.223845
Low:High:Low:K024	0.148663
Low:High:Low:K026	0.1841
Low:High:Low:K025	0.141503
Low:High:Low:K026	0.0723122
Low:High:Low:K024	0.107302
Low:High:Low:K017	0.0952281
Low:High:Low:K027	0.383265
Low:High:Low:K024	0.503559
Low:High:Low:K025	0.399519
Low:High:Low:K026	0.440093
Low:High:Low:K017	0.436941
Low:High:Low:K027	0.548705
Low:High:Low:K027	0.481377
Low:High:Low:K017	0.583894
Low:High:Low:K024	0.445018
Low:High:Low:K025	0.596527
Low:High:Low:K026	0.337615
Low:High:Low:K026	0.129238
Low:High:Low:K025	0.147908
Low:High:Low:K024	0.241855
Low:High:Low:K027	0.634363
Low:High:Low:K017	0.187878
Low:High:Low:K026	0.192616
Low:High:Low:K025	0.355947
Low:High:Low:K024	0.581549
Low:High:Low:K027	0.877022
Low:High:Low:K017	0.666482
Low:High:Low:K027	0.399216
Low:High:Low:K017	0.142316
Low:High:Low:K025	0.206817
Low:High:Low:K024	0.107845
Low:High:Low:K026	0.141442
Low:High:Low:K027	0.315279
Low:High:Low:K017	0.417084
Low:High:Low:K026	0.118294
Low:High:Low:K025	0.307482
Low:High:Low:K024	0.317793
Low:High:Low:K027	0.0481802
Low:High:Low:K017	0.0925271
Low:High:Low:K026	0.00554964
Low:High:Low:K025	0.0145898
Low:High:Low:K024	0.00823633
Low:High:Low:K017	0.0679982
Low:High:Low:K027	0.251943
Low:High:Low:K024	0.0818035
Low:High:Low:K025	0.0565986
Low:High:Low:K026	0.0525636
Low:High:Low:K017	0.10572
Low:High:Low:K027	0.251864
Low:High:Low:K026	0.102536
Low:High:Low:K025	0.114708
Low:High:Low:K024	0.237529
Low:High:Low:K024	0.157785
Low:High:Low:K025	0.12792
Low:High:Low:K026	0.0308642
Low:High:Low:K017	0.197982
Low:High:Low:K027	0.301492
Low:High:Low:K027	0.279016
Low:High:Low:K017	0.248413
Low:High:Low:K024	0.296654
Low:High:Low:K025	0.19752
Low:High:Low:K026	0.160778
Low:High:Low:K024	0.283277
Low:High:Low:K025	0.089465
Low:High:Low:K026	0.185668
Low:High:Low:K027	0.133139
Low:High:Low:K017	0.279196
Low:High:Low:K024	0.161241
Low:High:Low:K025	0.259146
Low:High:Low:K026	0.13613
Low:High:Low:K017	0.427413
Low:High:Low:K027	0.530775
Low:High:Low:K024	0.107173
Low:High:Low:K025	0.14574
Low:High:Low:K026	0.0799098
Low:High:Low:K017	0.208475
Low:High:Low:K027	0.509083
Low:High:Low:K017	0.203082
Low:High:Low:K027	0.199762
Low:High:Low:K024	0.102443
Low:High:Low:K025	0.212971
Low:High:Low:K026	0.120614
Low:High:Low:K017	0.119241
Low:High:Low:K027	0.253884
Low:High:Low:K026	0.0904408
Low:High:Low:K025	0.108389
Low:High:Low:K024	0.189355
Low:High:Low:K027	0.200979
Low:High:Low:K017	0.155057
Low:High:Low:K025	0.158329
Low:High:Low:K026	0.106559
Low:High:Low:K024	0.122358
Low:High:Low:K017	0.177273
Low:High:Low:K027	0.546693
Low:High:Low:K025	0.270269
Low:High:Low:K024	0.18958
Low:High:Low:K026	0.192204
Low:High:Low:K026	0.108165
Low:High:Low:K025	0.0921657
Low:High:Low:K024	0.116826
Low:High:Low:K017	0.136783
Low:High:Low:K027	0.240767
Low:High:Low:K027	0.671551
Low:High:Low:K017	0.131136
Low:High:Low:K025	0.0628601
Low:High:Low:K024	0.102474
Low:High:Low:K026	0.0602183
Low:High:Low:K024	0.0809822
Low:High:Low:K025	0.0705011
Low:High:Low:K026	0.0623162
Low:High:Low:K027	0.102903
Low:High:Low:K017	0.114045
Low:High:Low:K017	0.103807
Low:High:Low:K027	0.239106
Low:High:Low:K026	0.0778243
Low:High:Low:K025	0.114058
Low:High:Low:K024	0.0524977
Low:High:Low:K017	0.241335
Low:High:Low:K027	0.93958
Low:High:Low:K026	0.172877
Low:High:Low:K025	0.338571
Low:High:Low:K024	0.262147
Low:High:Low:K027	0.233729
Low:High:Low:K017	0.0611307
Low:High:Low:K025	0.0934518
Low:High:Low:K026	0.0473897
Low:High:Low:K024	0.0964952
Low:High:Low:K017	0.116875
Low:High:Low:K027	0.301995
Low:High:Low:K025	0.00825939
Low:High:Low:K024	0.0218458
Low:High:Low:K026	0.0256065
Low:High:Low:K027	0.180764
Low:High:Low:K017	0.354467
Low:High:Low:K025	0.19148
Low:High:Low:K024	0.254247
Low:High:Low:K026	0.171466
Low:High:Low:K024	0.268374
Low:High:Low:K025	0.230315
Low:High:Low:K026	0.14623
Low:High:Low:K027	0.409391
Low:High:Low:K017	0.360714
Low:High:Low:K027	0.582486
Low:High:Low:K017	0.081166
Low:High:Low:K025	0.0737578
Low:High:Low:K024	0.127804
Low:High:Low:K026	0.0535266
Low:High:Low:K025	0.415565
Low:High:Low:K024	0.336435
Low:High:Low:K026	0.213169
Low:High:Low:K027	0.295684
Low:High:Low:K017	0.210283
Low:High:Low:K026	0.14472
Low:High:Low:K025	0.054446
Low:High:Low:K024	0.0617418
Low:High:Low:K027	0.15028
Low:High:Low:K017	0.0943695
Low:High:Low:K027	0.131089
Low:High:Low:K017	0.123886
Low:High:Low:K025	0.0962746
Low:High:Low:K026	0.0637062
Low:High:Low:K024	0.153291

## Sheet: Sheet4
Figure6-figure supplement 1-source data 1: Raw. Violin plots showing DNA methylation of SVA copies in previously reported Skeletal muscle, CD4 T cell and Sperm
group	meth			group	meth			group	meth
Low:High:Low:SkeltalMuscle:MS003301	0.954545			Low:High:Low:CD4_p_helperT:MS000701	0.975205			Low:High:High:Inf_OAT019	0.712559
Low:High:Low:SkeltalMuscle:MS004901	0.891017			Low:High:Low:CD4_p_helperT:MS002801	0.986486			Low:High:High:Inf_NC007	0.760606
Low:High:Low:SkeltalMuscle:MS004501	0.863636			Low:High:Low:CD4_p_helperT:MS002901	0.987053			Low:High:High:Inf_NC005	0.790102
Low:High:Low:SkeltalMuscle:MS003901	0.87082			Low:High:Low:CD4_p_helperT:MS003001	0.956522			Low:High:High:Inf_OAT018	0.891756
Low:High:Low:SkeltalMuscle:MS001701	0.949024			Low:High:Low:CD4_p_helperT:MS001001	0.977246			Low:High:High:Inf_OAT021	0.79668
Low:High:Low:SkeltalMuscle:MS001201	0.907097			Low:High:Low:CD4_p_helperT:MS002701	0.932041			Low:High:High:Inf_OAT020	0.810111
Low:High:Low:SkeltalMuscle:MS003601	0.727273			Low:High:Low:CD4_p_helperT:MS032001	0.937204			Low:High:High:Inf_NC008	0.811276
Low:High:Low:SkeltalMuscle:MS001501	0.880625			Low:High:Low:CD4_p_helperT:MS001101	0.971948			Low:High:High:Inf_OAT015	0.782949
Low:High:Low:SkeltalMuscle:MS001801	1			Low:High:Low:CD4_p_helperT:MS000901	0.979762			Low:High:High:Inf_NC004	0.782369
Low:High:Low:SkeltalMuscle:MS001901	0.866667			Low:High:Low:CD4_p_helperT:MS000801	0.970816			Low:High:High:Inf_NC002	0.780346
Low:High:Low:SkeltalMuscle:MS003701	0.875352			Low:High:Low:CD4_p_helperT:MS017605	0.979048			Low:High:High:Inf_OAT017	0.790711
Low:High:Low:SkeltalMuscle:MS005101	0.909091			Low:High:Low:CD4_p_helperT:MS007903	0.948846			Low:High:High:Inf_OAT019	0.714261
Low:High:Low:SkeltalMuscle:MS001301	0.91			Low:High:Low:CD4_p_helperT:MS002401	0.986029			Low:High:High:Inf_OAT018	0.887381
Low:High:Low:SkeltalMuscle:MS005001	0.898421			Low:High:Low:CD4_p_helperT:MS000601	0.953171			Low:High:High:Inf_NC005	0.812238
Low:High:Low:SkeltalMuscle:MS004701	0.868571			Low:High:Low:CD4_p_helperT:MS002501	0.931087			Low:High:High:Inf_NC007	0.835238
Low:High:Low:SkeltalMuscle:MS004501	0.953125			Low:High:Low:CD4_p_helperT:MS000401	0.989221			Low:High:High:Inf_NC008	0.904508
Low:High:Low:SkeltalMuscle:MS003301	0.727273			Low:High:Low:CD4_p_helperT:MS000501	0.98931			Low:High:High:Inf_OAT015	0.863594
Low:High:Low:SkeltalMuscle:MS004901	0.88075			Low:High:Low:CD4_p_helperT:MS002601	0.966667			Low:High:High:Inf_OAT021	0.705482
Low:High:Low:SkeltalMuscle:MS001701	0.882188			Low:High:Low:CD4_p_helperT:MS000601	0.9375			Low:High:High:Inf_OAT020	0.924059
Low:High:Low:SkeltalMuscle:MS003601	0.950909			Low:High:Low:CD4_p_helperT:MS002501	1			Low:High:High:Inf_NC004	0.6502
Low:High:Low:SkeltalMuscle:MS001201	0.876129			Low:High:Low:CD4_p_helperT:MS002401	0.913258			Low:High:High:Inf_OAT017	0.811806
Low:High:Low:SkeltalMuscle:MS003901	0.921159			Low:High:Low:CD4_p_helperT:MS007903	0.949032			Low:High:High:Inf_NC002	0.810992
Low:High:Low:SkeltalMuscle:MS003701	0.924217			Low:High:Low:CD4_p_helperT:MS000501	0.972286			Low:High:High:Inf_NC008	0.765529
Low:High:Low:SkeltalMuscle:MS001901	0.990909			Low:High:Low:CD4_p_helperT:MS002601	0.961463			Low:High:High:Inf_OAT015	0.770858
Low:High:Low:SkeltalMuscle:MS001501	0.919444			Low:High:Low:CD4_p_helperT:MS000401	0.934925			Low:High:High:Inf_OAT021	0.731362
Low:High:Low:SkeltalMuscle:MS001801	0.932766			Low:High:Low:CD4_p_helperT:MS002801	0.974068			Low:High:High:Inf_OAT020	0.738071
Low:High:Low:SkeltalMuscle:MS004701	0.916714			Low:High:Low:CD4_p_helperT:MS002901	0.921519			Low:High:High:Inf_NC002	0.715135
Low:High:Low:SkeltalMuscle:MS001301	0.884286			Low:High:Low:CD4_p_helperT:MS000701	0.964118			Low:High:High:Inf_NC004	0.729197
Low:High:Low:SkeltalMuscle:MS005001	0.913718			Low:High:Low:CD4_p_helperT:MS000901	0.946667			Low:High:High:Inf_OAT017	0.641631
Low:High:Low:SkeltalMuscle:MS005101	0.866071			Low:High:Low:CD4_p_helperT:MS001101	0.981389			Low:High:High:Inf_OAT019	0.678233
Low:High:Low:SkeltalMuscle:MS004501	0.934783			Low:High:Low:CD4_p_helperT:MS000801	0.976095			Low:High:High:Inf_OAT018	0.787157
Low:High:Low:SkeltalMuscle:MS003301	1			Low:High:Low:CD4_p_helperT:MS017605	0.872051			Low:High:High:Inf_NC007	0.681349
Low:High:Low:SkeltalMuscle:MS004901	0.954706			Low:High:Low:CD4_p_helperT:MS003001	0.945455			Low:High:High:Inf_NC005	0.689972
Low:High:Low:SkeltalMuscle:MS003901	0.934608			Low:High:Low:CD4_p_helperT:MS002701	0.955352			Low:High:High:Inf_OAT017	0.870431
Low:High:Low:SkeltalMuscle:MS001201	0.957955			Low:High:Low:CD4_p_helperT:MS032001	0.899048			Low:High:High:Inf_NC002	0.886017
Low:High:Low:SkeltalMuscle:MS001701	0.942195			Low:High:Low:CD4_p_helperT:MS001001	0.975051			Low:High:High:Inf_NC004	0.638477
Low:High:Low:SkeltalMuscle:MS003601	0.964286			Low:High:Low:CD4_p_helperT:MS000401	0.961268			Low:High:High:Inf_OAT015	0.898302
Low:High:Low:SkeltalMuscle:MS001901	0.9606			Low:High:Low:CD4_p_helperT:MS000501	0.959302			Low:High:High:Inf_NC008	0.86237
Low:High:Low:SkeltalMuscle:MS003701	0.942857			Low:High:Low:CD4_p_helperT:MS002601	0.986364			Low:High:High:Inf_OAT020	0.882606
Low:High:Low:SkeltalMuscle:MS001501	0.943929			Low:High:Low:CD4_p_helperT:MS007903	1			Low:High:High:Inf_OAT021	0.838682
Low:High:Low:SkeltalMuscle:MS001801	0.875			Low:High:Low:CD4_p_helperT:MS002401	0.977263			Low:High:High:Inf_OAT018	0.800046
Low:High:Low:SkeltalMuscle:MS001301	0.944095			Low:High:Low:CD4_p_helperT:MS000601	0.996774			Low:High:High:Inf_NC007	0.974359
Low:High:Low:SkeltalMuscle:MS005001	0.960989			Low:High:Low:CD4_p_helperT:MS002501	0.940909			Low:High:High:Inf_NC005	0.8427
Low:High:Low:SkeltalMuscle:MS004701	0.963768			Low:High:Low:CD4_p_helperT:MS003001	0.964333			Low:High:High:Inf_OAT019	0.809064
Low:High:Low:SkeltalMuscle:MS005101	0.904			Low:High:Low:CD4_p_helperT:MS032001	0.96264			Low:High:High:Inf_OAT018	0.87633
Low:High:Low:SkeltalMuscle:MS004701	0.939324			Low:High:Low:CD4_p_helperT:MS002701	0.968462			Low:High:High:Inf_NC007	0.947673
Low:High:Low:SkeltalMuscle:MS005001	0.94473			Low:High:Low:CD4_p_helperT:MS001001	0.96271			Low:High:High:Inf_NC005	0.879879
Low:High:Low:SkeltalMuscle:MS001301	0.968454			Low:High:Low:CD4_p_helperT:MS000901	0.988372			Low:High:High:Inf_OAT019	0.872327
Low:High:Low:SkeltalMuscle:MS005101	0.943396			Low:High:Low:CD4_p_helperT:MS001101	0.951778			Low:High:High:Inf_NC004	0.854632
Low:High:Low:SkeltalMuscle:MS003701	0.956944			Low:High:Low:CD4_p_helperT:MS000801	0.981719			Low:High:High:Inf_OAT017	0.812614
Low:High:Low:SkeltalMuscle:MS001901	0.894737			Low:High:Low:CD4_p_helperT:MS017605	1			Low:High:High:Inf_NC002	0.872631
Low:High:Low:SkeltalMuscle:MS001801	0.896949			Low:High:Low:CD4_p_helperT:MS000701	0.9			Low:High:High:Inf_NC008	0.878161
Low:High:Low:SkeltalMuscle:MS001501	0.960659			Low:High:Low:CD4_p_helperT:MS002801	0.984211			Low:High:High:Inf_OAT015	0.913186
Low:High:Low:SkeltalMuscle:MS001701	0.972771			Low:High:Low:CD4_p_helperT:MS002901	0.962889			Low:High:High:Inf_OAT021	0.899594
Low:High:Low:SkeltalMuscle:MS001201	0.939505			Low:High:Low:CD4_p_helperT:MS000401	0.97125			Low:High:High:Inf_OAT020	0.923567
Low:High:Low:SkeltalMuscle:MS003601	0.975			Low:High:Low:CD4_p_helperT:MS002601	0.947759			Low:High:High:Inf_OAT019	0.827123
Low:High:Low:SkeltalMuscle:MS003901	0.937027			Low:High:Low:CD4_p_helperT:MS000501	0.948902			Low:High:High:Inf_NC005	0.890266
Low:High:Low:SkeltalMuscle:MS004501	0.944828			Low:High:Low:CD4_p_helperT:MS002401	0.987805			Low:High:High:Inf_NC007	0.715152
Low:High:Low:SkeltalMuscle:MS004901	0.935769			Low:High:Low:CD4_p_helperT:MS007903	0.967742			Low:High:High:Inf_OAT018	0.867888
Low:High:Low:SkeltalMuscle:MS003301	1			Low:High:Low:CD4_p_helperT:MS002501	0.987429			Low:High:High:Inf_OAT021	0.828634
Low:High:Low:SkeltalMuscle:MS003901	0.937323			Low:High:Low:CD4_p_helperT:MS000601	0.954762			Low:High:High:Inf_OAT020	0.932143
Low:High:Low:SkeltalMuscle:MS001201	0.949149			Low:High:Low:CD4_p_helperT:MS001001	0.945882			Low:High:High:Inf_NC008	0.8513
Low:High:Low:SkeltalMuscle:MS003601	0.978158			Low:High:Low:CD4_p_helperT:MS002701	0.973023			Low:High:High:Inf_OAT015	0.878013
Low:High:Low:SkeltalMuscle:MS001701	0.946429			Low:High:Low:CD4_p_helperT:MS032001	0.942099			Low:High:High:Inf_OAT017	0.787014
Low:High:Low:SkeltalMuscle:MS003301	1			Low:High:Low:CD4_p_helperT:MS003001	0.925588			Low:High:High:Inf_NC004	0.713697
Low:High:Low:SkeltalMuscle:MS004901	0.952903			Low:High:Low:CD4_p_helperT:MS017605	0.947674			Low:High:High:Inf_NC002	0.888744
Low:High:Low:SkeltalMuscle:MS004501	0.969167			Low:High:Low:CD4_p_helperT:MS000801	0.968082			Low:High:High:Inf_NC007	0.926667
Low:High:Low:SkeltalMuscle:MS005101	0.953704			Low:High:Low:CD4_p_helperT:MS001101	0.959286			Low:High:High:Inf_NC005	0.889081
Low:High:Low:SkeltalMuscle:MS001301	0.920236			Low:High:Low:CD4_p_helperT:MS000901	0.961975			Low:High:High:Inf_OAT018	0.77151
Low:High:Low:SkeltalMuscle:MS005001	0.934167			Low:High:Low:CD4_p_helperT:MS000701	0.868727			Low:High:High:Inf_OAT019	0.771945
Low:High:Low:SkeltalMuscle:MS004701	0.991228			Low:High:Low:CD4_p_helperT:MS002901	0.93254			Low:High:High:Inf_OAT017	0.842404
Low:High:Low:SkeltalMuscle:MS001501	0.965514			Low:High:Low:CD4_p_helperT:MS002801	0.9794			Low:High:High:Inf_NC004	0.8336
Low:High:Low:SkeltalMuscle:MS001801	0.957383			Low:High:Low:CD4_p_helperT:MS000901	0.979032			Low:High:High:Inf_NC002	0.857847
Low:High:Low:SkeltalMuscle:MS001901	1			Low:High:Low:CD4_p_helperT:MS001101	0.9925			Low:High:High:Inf_OAT021	0.639429
Low:High:Low:SkeltalMuscle:MS003701	0.96053			Low:High:Low:CD4_p_helperT:MS000801	0.910909			Low:High:High:Inf_OAT020	0.897106
Low:High:Low:SkeltalMuscle:MS003901	0.713158			Low:High:Low:CD4_p_helperT:MS017605	0.916667			Low:High:High:Inf_NC008	0.793459
Low:High:Low:SkeltalMuscle:MS001701	0.83			Low:High:Low:CD4_p_helperT:MS003001	1			Low:High:High:Inf_OAT015	0.956368
Low:High:Low:SkeltalMuscle:MS003601	0.764348			Low:High:Low:CD4_p_helperT:MS002701	0.983774			Low:High:High:Inf_NC004	0.777976
Low:High:Low:SkeltalMuscle:MS001201	0.850909			Low:High:Low:CD4_p_helperT:MS032001	0.9615			Low:High:High:Inf_NC002	0.861525
Low:High:Low:SkeltalMuscle:MS004501	0.793684			Low:High:Low:CD4_p_helperT:MS001001	0.987231			Low:High:High:Inf_OAT017	0.748049
Low:High:Low:SkeltalMuscle:MS003301	0.785714			Low:High:Low:CD4_p_helperT:MS002801	0.987021			Low:High:High:Inf_OAT020	0.735099
Low:High:Low:SkeltalMuscle:MS004901	0.866964			Low:High:Low:CD4_p_helperT:MS002901	0.942063			Low:High:High:Inf_OAT021	0.767316
Low:High:Low:SkeltalMuscle:MS001301	0.865333			Low:High:Low:CD4_p_helperT:MS000701	0.988636			Low:High:High:Inf_OAT015	0.899673
Low:High:Low:SkeltalMuscle:MS005001	0.792286			Low:High:Low:CD4_p_helperT:MS000501	0.939737			Low:High:High:Inf_NC008	0.896536
Low:High:Low:SkeltalMuscle:MS004701	0.8335			Low:High:Low:CD4_p_helperT:MS002601	0.982333			Low:High:High:Inf_NC005	0.835573
Low:High:Low:SkeltalMuscle:MS005101	0.739286			Low:High:Low:CD4_p_helperT:MS000401	0.989787			Low:High:High:Inf_NC007	0.878571
Low:High:Low:SkeltalMuscle:MS001901	0.789394			Low:High:Low:CD4_p_helperT:MS000601	0.909091			Low:High:High:Inf_OAT018	0.897222
Low:High:Low:SkeltalMuscle:MS003701	0.850278			Low:High:Low:CD4_p_helperT:MS002501	0.929167			Low:High:High:Inf_OAT019	0.768067
Low:High:Low:SkeltalMuscle:MS001501	0.875882			Low:High:Low:CD4_p_helperT:MS002401	0.972152			Low:High:High:Inf_OAT020	0.885544
Low:High:Low:SkeltalMuscle:MS001801	0.892647			Low:High:Low:CD4_p_helperT:MS007903	1			Low:High:High:Inf_OAT021	0.86674
Low:High:Low:SkeltalMuscle:MS001801	0.906962			Low:High:Low:CD4_p_helperT:MS000701	0.982836			Low:High:High:Inf_OAT015	0.891607
Low:High:Low:SkeltalMuscle:MS001501	0.965556			Low:High:Low:CD4_p_helperT:MS002901	0.923077			Low:High:High:Inf_NC008	0.874744
Low:High:Low:SkeltalMuscle:MS001901	0.87963			Low:High:Low:CD4_p_helperT:MS002801	0.916154			Low:High:High:Inf_NC002	0.894961
Low:High:Low:SkeltalMuscle:MS003701	0.9406			Low:High:Low:CD4_p_helperT:MS002701	0.963556			Low:High:High:Inf_OAT017	0.909355
Low:High:Low:SkeltalMuscle:MS005101	0.855909			Low:High:Low:CD4_p_helperT:MS032001	0.948281			Low:High:High:Inf_NC004	0.893631
Low:High:Low:SkeltalMuscle:MS005001	0.945672			Low:High:Low:CD4_p_helperT:MS001001	0.965926			Low:High:High:Inf_OAT019	0.870816
Low:High:Low:SkeltalMuscle:MS001301	0.940642			Low:High:Low:CD4_p_helperT:MS003001	0.988571			Low:High:High:Inf_NC005	0.885303
Low:High:Low:SkeltalMuscle:MS004701	0.895833			Low:High:Low:CD4_p_helperT:MS017605	0.907407			Low:High:High:Inf_NC007	0.945455
Low:High:Low:SkeltalMuscle:MS004901	0.967717			Low:High:Low:CD4_p_helperT:MS000801	0.943182			Low:High:High:Inf_OAT018	0.907075
Low:High:Low:SkeltalMuscle:MS003301	0.975			Low:High:Low:CD4_p_helperT:MS000901	0.950233			Low:High:High:Inf_OAT017	0.750279
Low:High:Low:SkeltalMuscle:MS004501	0.903684			Low:High:Low:CD4_p_helperT:MS001101	0.969275			Low:High:High:Inf_NC002	0.860215
Low:High:Low:SkeltalMuscle:MS003901	0.971744			Low:High:Low:CD4_p_helperT:MS002401	0.971429			Low:High:High:Inf_NC004	0.612229
Low:High:Low:SkeltalMuscle:MS001201	0.933452			Low:High:Low:CD4_p_helperT:MS007903	1			Low:High:High:Inf_OAT015	0.87255
Low:High:Low:SkeltalMuscle:MS001701	0.968586			Low:High:Low:CD4_p_helperT:MS002501	0.970588			Low:High:High:Inf_NC008	0.749735
Low:High:Low:SkeltalMuscle:MS003601	0.857143			Low:High:Low:CD4_p_helperT:MS000601	0.957344			Low:High:High:Inf_OAT020	0.863578
Low:High:Low:SkeltalMuscle:MS003701	0.947176			Low:High:Low:CD4_p_helperT:MS000401	0.965			Low:High:High:Inf_OAT021	0.597069
Low:High:Low:SkeltalMuscle:MS001901	0.901905			Low:High:Low:CD4_p_helperT:MS002601	0.823125			Low:High:High:Inf_OAT018	0.904568
Low:High:Low:SkeltalMuscle:MS001801	0.914366			Low:High:Low:CD4_p_helperT:MS000501	0.970244			Low:High:High:Inf_NC005	0.864462
Low:High:Low:SkeltalMuscle:MS001501	0.900909			Low:High:Low:CD4_p_helperT:MS000401	0.990469			Low:High:High:Inf_NC007	0.924048
Low:High:Low:SkeltalMuscle:MS004701	0.88519			Low:High:Low:CD4_p_helperT:MS002601	0.965278			Low:High:High:Inf_OAT019	0.57212
Low:High:Low:SkeltalMuscle:MS005001	0.893516			Low:High:Low:CD4_p_helperT:MS000501	0.991167			Low:High:High:Inf_NC002	0.88773
Low:High:Low:SkeltalMuscle:MS001301	0.903187			Low:High:Low:CD4_p_helperT:MS002401	0.973016			Low:High:High:Inf_NC004	0.888816
Low:High:Low:SkeltalMuscle:MS005101	0.935085			Low:High:Low:CD4_p_helperT:MS007903	1			Low:High:High:Inf_OAT017	0.90576
Low:High:Low:SkeltalMuscle:MS004501	0.953488			Low:High:Low:CD4_p_helperT:MS002501	0.988372			Low:High:High:Inf_OAT015	0.852022
Low:High:Low:SkeltalMuscle:MS004901	0.924717			Low:High:Low:CD4_p_helperT:MS000601	0.994444			Low:High:High:Inf_NC008	0.886355
Low:High:Low:SkeltalMuscle:MS003301	0.855556			Low:High:Low:CD4_p_helperT:MS001001	0.998409			Low:High:High:Inf_OAT020	0.887704
Low:High:Low:SkeltalMuscle:MS001201	0.913293			Low:High:Low:CD4_p_helperT:MS002701	0.988448			Low:High:High:Inf_OAT021	0.820372
Low:High:Low:SkeltalMuscle:MS001701	0.846966			Low:High:Low:CD4_p_helperT:MS032001	0.952727			Low:High:High:Inf_OAT018	0.90594
Low:High:Low:SkeltalMuscle:MS003601	0.859375			Low:High:Low:CD4_p_helperT:MS003001	1			Low:High:High:Inf_NC007	0.889348
Low:High:Low:SkeltalMuscle:MS003901	0.892034			Low:High:Low:CD4_p_helperT:MS017605	1			Low:High:High:Inf_NC005	0.88093
Low:High:Low:SkeltalMuscle:MS003901	0.9025			Low:High:Low:CD4_p_helperT:MS000801	0.990313			Low:High:High:Inf_OAT019	0.864378
Low:High:Low:SkeltalMuscle:MS003601	0.933939			Low:High:Low:CD4_p_helperT:MS001101	0.966279			Low:High:High:Inf_OAT017	0.88568
Low:High:Low:SkeltalMuscle:MS001201	0.883556			Low:High:Low:CD4_p_helperT:MS000901	0.9716			Low:High:High:Inf_NC004	0.872597
Low:High:Low:SkeltalMuscle:MS001701	0.934078			Low:High:Low:CD4_p_helperT:MS000701	0.97			Low:High:High:Inf_NC002	0.885919
Low:High:Low:SkeltalMuscle:MS003301	0.958333			Low:High:Low:CD4_p_helperT:MS002901	0.960541			Low:High:High:Inf_NC008	0.868367
Low:High:Low:SkeltalMuscle:MS004901	0.943511			Low:High:Low:CD4_p_helperT:MS002801	0.972222			Low:High:High:Inf_OAT015	0.902768
Low:High:Low:SkeltalMuscle:MS004501	0.930385			Low:High:Low:CD4_p_helperT:MS000701	0.952821			Low:High:High:Inf_OAT021	0.870177
Low:High:Low:SkeltalMuscle:MS005101	0.952727			Low:High:Low:CD4_p_helperT:MS002801	0.988387			Low:High:High:Inf_OAT020	0.911083
Low:High:Low:SkeltalMuscle:MS001301	0.908333			Low:High:Low:CD4_p_helperT:MS002901	0.90697			Low:High:High:Inf_OAT018	0.885414
Low:High:Low:SkeltalMuscle:MS005001	0.91633			Low:High:Low:CD4_p_helperT:MS003001	0.959286			Low:High:High:Inf_NC007	0.945714
Low:High:Low:SkeltalMuscle:MS004701	0.946835			Low:High:Low:CD4_p_helperT:MS032001	0.955556			Low:High:High:Inf_NC005	0.856359
Low:High:Low:SkeltalMuscle:MS001801	0.849655			Low:High:Low:CD4_p_helperT:MS002701	0.970182			Low:High:High:Inf_OAT019	0.809254
Low:High:Low:SkeltalMuscle:MS001501	0.907375			Low:High:Low:CD4_p_helperT:MS001001	0.990244			Low:High:High:Inf_OAT020	0.867521
Low:High:Low:SkeltalMuscle:MS001901	0.909706			Low:High:Low:CD4_p_helperT:MS000901	0.980755			Low:High:High:Inf_OAT021	0.885138
Low:High:Low:SkeltalMuscle:MS003701	0.921124			Low:High:Low:CD4_p_helperT:MS001101	0.966444			Low:High:High:Inf_OAT015	0.878704
Low:High:Low:SkeltalMuscle:MS001901	1			Low:High:Low:CD4_p_helperT:MS000801	0.96125			Low:High:High:Inf_NC008	0.870078
Low:High:Low:SkeltalMuscle:MS003701	0.942987			Low:High:Low:CD4_p_helperT:MS017605	0.987857			Low:High:High:Inf_NC002	0.90004
Low:High:Low:SkeltalMuscle:MS001501	0.909474			Low:High:Low:CD4_p_helperT:MS002401	0.944925			Low:High:High:Inf_NC004	0.799346
Low:High:Low:SkeltalMuscle:MS001801	0.899773			Low:High:Low:CD4_p_helperT:MS007903	0.993103			Low:High:High:Inf_OAT017	0.873611
Low:High:Low:SkeltalMuscle:MS001301	0.9484			Low:High:Low:CD4_p_helperT:MS000601	0.975806			Low:High:High:Inf_OAT019	0.834871
Low:High:Low:SkeltalMuscle:MS005001	0.83625			Low:High:Low:CD4_p_helperT:MS002501	0.974576			Low:High:High:Inf_NC005	0.9
Low:High:Low:SkeltalMuscle:MS004701	0.909091			Low:High:Low:CD4_p_helperT:MS000401	0.922051			Low:High:High:Inf_NC007	0.948148
Low:High:Low:SkeltalMuscle:MS005101	0.833571			Low:High:Low:CD4_p_helperT:MS000501	0.893939			Low:High:High:Inf_OAT018	0.897975
Low:High:Low:SkeltalMuscle:MS004501	0.955667			Low:High:Low:CD4_p_helperT:MS002601	0.957241			Low:High:High:Inf_NC002	0.854322
Low:High:Low:SkeltalMuscle:MS003301	0.928571			Low:High:Low:CD4_p_helperT:MS001101	0.984348			Low:High:High:Inf_NC004	0.668183
Low:High:Low:SkeltalMuscle:MS004901	0.934333			Low:High:Low:CD4_p_helperT:MS000901	0.97764			Low:High:High:Inf_OAT017	0.88924
Low:High:Low:SkeltalMuscle:MS003901	0.946842			Low:High:Low:CD4_p_helperT:MS000801	0.985663			Low:High:High:Inf_OAT021	0.769527
Low:High:Low:SkeltalMuscle:MS003601	0.929615			Low:High:Low:CD4_p_helperT:MS017605	0.953607			Low:High:High:Inf_OAT020	0.730551
Low:High:Low:SkeltalMuscle:MS001201	0.891875			Low:High:Low:CD4_p_helperT:MS003001	0.996377			Low:High:High:Inf_NC008	0.775117
Low:High:Low:SkeltalMuscle:MS001701	0.896977			Low:High:Low:CD4_p_helperT:MS001001	0.982			Low:High:High:Inf_OAT015	0.81573
Low:High:Low:SkeltalMuscle:MS003301	0.9525			Low:High:Low:CD4_p_helperT:MS032001	0.965977			Low:High:High:Inf_NC007	0.865162
Low:High:Low:SkeltalMuscle:MS004901	0.878039			Low:High:Low:CD4_p_helperT:MS002701	0.980594			Low:High:High:Inf_NC005	0.82334
Low:High:Low:SkeltalMuscle:MS004501	0.84375			Low:High:Low:CD4_p_helperT:MS002801	0.979231			Low:High:High:Inf_OAT018	0.868582
Low:High:Low:SkeltalMuscle:MS003601	0.909091			Low:High:Low:CD4_p_helperT:MS002901	0.964493			Low:High:High:Inf_OAT019	0.488639
Low:High:Low:SkeltalMuscle:MS001701	0.855783			Low:High:Low:CD4_p_helperT:MS000701	0.962329			Low:High:High:Inf_NC002	0.837663
Low:High:Low:SkeltalMuscle:MS001201	0.951458			Low:High:Low:CD4_p_helperT:MS000501	0.976			Low:High:High:Inf_NC004	0.762311
Low:High:Low:SkeltalMuscle:MS003901	0.917193			Low:High:Low:CD4_p_helperT:MS002601	0.990455			Low:High:High:Inf_OAT017	0.766856
Low:High:Low:SkeltalMuscle:MS001801	0.921875			Low:High:Low:CD4_p_helperT:MS000401	0.983827			Low:High:High:Inf_OAT020	0.879573
Low:High:Low:SkeltalMuscle:MS001501	0.860455			Low:High:Low:CD4_p_helperT:MS000601	0.988333			Low:High:High:Inf_OAT021	0.692952
Low:High:Low:SkeltalMuscle:MS003701	0.889333			Low:High:Low:CD4_p_helperT:MS002501	0.973333			Low:High:High:Inf_OAT015	0.891703
Low:High:Low:SkeltalMuscle:MS001901	0.939815			Low:High:Low:CD4_p_helperT:MS002401	0.986942			Low:High:High:Inf_NC008	0.818434
Low:High:Low:SkeltalMuscle:MS005101	0.95098			Low:High:Low:CD4_p_helperT:MS007903	0.979592			Low:High:High:Inf_NC007	0.94375
Low:High:Low:SkeltalMuscle:MS004701	0.884035			Low:High:Low:CD4_p_helperT:MS000501	0.942747			Low:High:High:Inf_NC005	0.902728
Low:High:Low:SkeltalMuscle:MS001301	0.933303			Low:High:Low:CD4_p_helperT:MS002601	0.952097			Low:High:High:Inf_OAT018	0.766749
Low:High:Low:SkeltalMuscle:MS005001	0.900571			Low:High:Low:CD4_p_helperT:MS000401	0.934464			Low:High:High:Inf_OAT019	0.750286
Low:High:Low:SkeltalMuscle:MS001801	0.935849			Low:High:Low:CD4_p_helperT:MS000601	0.943273			Low:High:High:Inf_OAT019	0.808443
Low:High:Low:SkeltalMuscle:MS001501	0.926098			Low:High:Low:CD4_p_helperT:MS002501	0.958			Low:High:High:Inf_OAT018	0.837654
Low:High:Low:SkeltalMuscle:MS001901	0.955			Low:High:Low:CD4_p_helperT:MS002401	0.93			Low:High:High:Inf_NC007	0.894872
Low:High:Low:SkeltalMuscle:MS003701	0.952931			Low:High:Low:CD4_p_helperT:MS007903	1			Low:High:High:Inf_NC005	0.834857
Low:High:Low:SkeltalMuscle:MS005101	0.963208			Low:High:Low:CD4_p_helperT:MS000901	0.979419			Low:High:High:Inf_OAT015	0.78129
Low:High:Low:SkeltalMuscle:MS001301	0.935877			Low:High:Low:CD4_p_helperT:MS001101	0.95359			Low:High:High:Inf_NC008	0.890617
Low:High:Low:SkeltalMuscle:MS005001	0.949649			Low:High:Low:CD4_p_helperT:MS017605	0.934186			Low:High:High:Inf_OAT020	0.935149
Low:High:Low:SkeltalMuscle:MS004701	0.951842			Low:High:Low:CD4_p_helperT:MS000801	0.942857			Low:High:High:Inf_OAT021	0.841392
Low:High:Low:SkeltalMuscle:MS003301	0.9334			Low:High:Low:CD4_p_helperT:MS003001	0.966835			Low:High:High:Inf_NC002	0.834419
Low:High:Low:SkeltalMuscle:MS004901	0.946198			Low:High:Low:CD4_p_helperT:MS032001	0.954			Low:High:High:Inf_NC004	0.811183
Low:High:Low:SkeltalMuscle:MS004501	0.983871			Low:High:Low:CD4_p_helperT:MS002701	0.968276			Low:High:High:Inf_OAT017	0.871517
Low:High:Low:SkeltalMuscle:MS003901	0.933246			Low:High:Low:CD4_p_helperT:MS001001	0.945			Low:High:High:Inf_NC007	0.830326
Low:High:Low:SkeltalMuscle:MS001201	0.94992			Low:High:Low:CD4_p_helperT:MS002801	0.940606			Low:High:High:Inf_NC005	0.831821
Low:High:Low:SkeltalMuscle:MS001701	0.950935			Low:High:Low:CD4_p_helperT:MS002901	0.920968			Low:High:High:Inf_OAT018	0.606519
Low:High:Low:SkeltalMuscle:MS003601	0.923548			Low:High:Low:CD4_p_helperT:MS000701	0.964096			Low:High:High:Inf_OAT019	0.640859
Low:High:Low:SkeltalMuscle:MS005101	0.976818			Low:High:Low:CD4_p_helperT:MS000501	0.933043			Low:High:High:Inf_OAT017	0.20881
Low:High:Low:SkeltalMuscle:MS001301	0.956429			Low:High:Low:CD4_p_helperT:MS002601	0.94375			Low:High:High:Inf_NC004	0.714026
Low:High:Low:SkeltalMuscle:MS005001	0.957805			Low:High:Low:CD4_p_helperT:MS000401	0.978824			Low:High:High:Inf_NC002	0.798219
Low:High:Low:SkeltalMuscle:MS004701	0.909367			Low:High:Low:CD4_p_helperT:MS000601	0.910392			Low:High:High:Inf_OAT020	0.731494
Low:High:Low:SkeltalMuscle:MS001501	0.987368			Low:High:Low:CD4_p_helperT:MS002501	0.963415			Low:High:High:Inf_OAT021	0.393436
Low:High:Low:SkeltalMuscle:MS001801	0.908936			Low:High:Low:CD4_p_helperT:MS002401	0.9218			Low:High:High:Inf_OAT015	0.813125
Low:High:Low:SkeltalMuscle:MS001901	0.980769			Low:High:Low:CD4_p_helperT:MS007903	0.8735			Low:High:High:Inf_NC008	0.717864
Low:High:Low:SkeltalMuscle:MS003701	0.96732			Low:High:Low:CD4_p_helperT:MS001101	0.92381			Low:High:High:Inf_OAT019	0.896094
Low:High:Low:SkeltalMuscle:MS003901	0.948191			Low:High:Low:CD4_p_helperT:MS000901	0.964923			Low:High:High:Inf_OAT018	0.892189
Low:High:Low:SkeltalMuscle:MS003601	0.867			Low:High:Low:CD4_p_helperT:MS017605	0.977273			Low:High:High:Inf_NC007	0.89881
Low:High:Low:SkeltalMuscle:MS001701	0.916293			Low:High:Low:CD4_p_helperT:MS000801	0.959672			Low:High:High:Inf_NC005	0.892734
Low:High:Low:SkeltalMuscle:MS001201	0.959328			Low:High:Low:CD4_p_helperT:MS003001	0.88125			Low:High:High:Inf_OAT015	0.871315
Low:High:Low:SkeltalMuscle:MS003301	0.956522			Low:High:Low:CD4_p_helperT:MS001001	0.966392			Low:High:High:Inf_NC008	0.832754
Low:High:Low:SkeltalMuscle:MS004901	0.871226			Low:High:Low:CD4_p_helperT:MS002701	1			Low:High:High:Inf_OAT020	0.922205
Low:High:Low:SkeltalMuscle:MS004501	0.888889			Low:High:Low:CD4_p_helperT:MS032001	0.934684			Low:High:High:Inf_OAT021	0.910768
Low:High:Low:SkeltalMuscle:MS003301	0.90625			Low:High:Low:CD4_p_helperT:MS002801	0.914762			Low:High:High:Inf_NC004	0.887112
Low:High:Low:SkeltalMuscle:MS004901	0.828			Low:High:Low:CD4_p_helperT:MS002901	0.955667			Low:High:High:Inf_OAT017	0.883709
Low:High:Low:SkeltalMuscle:MS004501	0.874865			Low:High:Low:CD4_p_helperT:MS000701	0.977031			Low:High:High:Inf_NC002	0.902874
Low:High:Low:SkeltalMuscle:MS001701	0.820694			Low:High:Low:CD4_p_helperT:MS002901	0.953735			Low:High:High:Inf_OAT019	0.757121
Low:High:Low:SkeltalMuscle:MS003601	0.831463			Low:High:Low:CD4_p_helperT:MS002801	0.972222			Low:High:High:Inf_OAT018	0.855799
Low:High:Low:SkeltalMuscle:MS001201	0.82194			Low:High:Low:CD4_p_helperT:MS000701	0.979153			Low:High:High:Inf_NC005	0.924918
Low:High:Low:SkeltalMuscle:MS003901	0.921176			Low:High:Low:CD4_p_helperT:MS000801	0.964583			Low:High:High:Inf_NC007	0.821088
Low:High:Low:SkeltalMuscle:MS001501	0.807206			Low:High:Low:CD4_p_helperT:MS017605	0.929825			Low:High:High:Inf_NC008	0.850625
Low:High:Low:SkeltalMuscle:MS001801	0.858793			Low:High:Low:CD4_p_helperT:MS000901	0.967059			Low:High:High:Inf_OAT015	0.867487
Low:High:Low:SkeltalMuscle:MS003701	0.806667			Low:High:Low:CD4_p_helperT:MS001101	0.968154			Low:High:High:Inf_OAT021	0.852205
Low:High:Low:SkeltalMuscle:MS001901	0.824722			Low:High:Low:CD4_p_helperT:MS002701	0.937125			Low:High:High:Inf_OAT020	0.77113
Low:High:Low:SkeltalMuscle:MS005101	0.98			Low:High:Low:CD4_p_helperT:MS032001	0.939556			Low:High:High:Inf_OAT017	0.868282
Low:High:Low:SkeltalMuscle:MS004701	0.876957			Low:High:Low:CD4_p_helperT:MS001001	0.977679			Low:High:High:Inf_NC002	0.84932
Low:High:Low:SkeltalMuscle:MS001301	0.863469			Low:High:Low:CD4_p_helperT:MS003001	0.975			Low:High:High:Inf_NC004	0.867783
Low:High:Low:SkeltalMuscle:MS005001	0.899565			Low:High:Low:CD4_p_helperT:MS002501	0.978333			Low:High:High:Inf_NC005	0.924623
Low:High:Low:SkeltalMuscle:MS005101	0.888889			Low:High:Low:CD4_p_helperT:MS000601	0.951449			Low:High:High:Inf_NC007	0.94127
Low:High:Low:SkeltalMuscle:MS001301	0.853475			Low:High:Low:CD4_p_helperT:MS002401	0.954268			Low:High:High:Inf_OAT018	0.935728
Low:High:Low:SkeltalMuscle:MS005001	0.845			Low:High:Low:CD4_p_helperT:MS007903	0.952121			Low:High:High:Inf_OAT019	0.903948
Low:High:Low:SkeltalMuscle:MS004701	0.78625			Low:High:Low:CD4_p_helperT:MS002601	0.96625			Low:High:High:Inf_NC004	0.954
Low:High:Low:SkeltalMuscle:MS001501	0.886351			Low:High:Low:CD4_p_helperT:MS000501	0.953878			Low:High:High:Inf_OAT017	0.945839
Low:High:Low:SkeltalMuscle:MS001801	0.824151			Low:High:Low:CD4_p_helperT:MS000401	0.962432			Low:High:High:Inf_NC002	0.93084
Low:High:Low:SkeltalMuscle:MS001901	0.941404			Low:High:Low:CD4_p_helperT:MS000401	0.962361			Low:High:High:Inf_OAT020	0.930735
Low:High:Low:SkeltalMuscle:MS003701	0.731351			Low:High:Low:CD4_p_helperT:MS000501	0.980638			Low:High:High:Inf_OAT021	0.947154
Low:High:Low:SkeltalMuscle:MS003901	0.940396			Low:High:Low:CD4_p_helperT:MS002601	0.918049			Low:High:High:Inf_OAT015	0.888662
Low:High:Low:SkeltalMuscle:MS003601	0.919355			Low:High:Low:CD4_p_helperT:MS002401	0.932209			Low:High:High:Inf_NC008	0.925286
Low:High:Low:SkeltalMuscle:MS001701	0.885778			Low:High:Low:CD4_p_helperT:MS007903	1			Low:High:High:Inf_OAT020	0.858743
Low:High:Low:SkeltalMuscle:MS001201	0.917836			Low:High:Low:CD4_p_helperT:MS000601	0.982059			Low:High:High:Inf_OAT021	0.912649
Low:High:Low:SkeltalMuscle:MS003301	1			Low:High:Low:CD4_p_helperT:MS002501	0.97381			Low:High:High:Inf_OAT015	0.935643
Low:High:Low:SkeltalMuscle:MS004901	0.888504			Low:High:Low:CD4_p_helperT:MS003001	0.89625			Low:High:High:Inf_NC008	0.885292
Low:High:Low:SkeltalMuscle:MS004501	0.932258			Low:High:Low:CD4_p_helperT:MS032001	0.925682			Low:High:High:Inf_NC004	0.843533
Low:High:Low:SkeltalMuscle:MS005101	0.959487			Low:High:Low:CD4_p_helperT:MS002701	0.944265			Low:High:High:Inf_NC002	0.862735
Low:High:Low:SkeltalMuscle:MS004701	0.9575			Low:High:Low:CD4_p_helperT:MS001001	0.951277			Low:High:High:Inf_OAT017	0.848498
Low:High:Low:SkeltalMuscle:MS005001	0.945972			Low:High:Low:CD4_p_helperT:MS000901	0.9814			Low:High:High:Inf_OAT019	0.853836
Low:High:Low:SkeltalMuscle:MS001301	0.944286			Low:High:Low:CD4_p_helperT:MS001101	0.928889			Low:High:High:Inf_NC007	0.929908
Low:High:Low:SkeltalMuscle:MS001501	0.948919			Low:High:Low:CD4_p_helperT:MS000801	0.962			Low:High:High:Inf_NC005	0.910921
Low:High:Low:SkeltalMuscle:MS001801	0.927273			Low:High:Low:CD4_p_helperT:MS017605	0.977778			Low:High:High:Inf_OAT018	0.940835
Low:High:Low:SkeltalMuscle:MS003701	0.901481			Low:High:Low:CD4_p_helperT:MS000701	0.943023			Low:High:High:Inf_NC007	0.864912
Low:High:Low:SkeltalMuscle:MS001901	0.857143			Low:High:Low:CD4_p_helperT:MS002801	0.972963			Low:High:High:Inf_NC005	0.888629
Low:High:Low:SkeltalMuscle:MS003601	1			Low:High:Low:CD4_p_helperT:MS002901	0.967391			Low:High:High:Inf_OAT018	0.908519
Low:High:Low:SkeltalMuscle:MS001201	0.905568			Low:High:Low:CD4_p_helperT:MS000701	0.961296			Low:High:High:Inf_OAT019	0.814901
Low:High:Low:SkeltalMuscle:MS001701	0.854722			Low:High:Low:CD4_p_helperT:MS002901	0.953443			Low:High:High:Inf_NC002	0.861016
Low:High:Low:SkeltalMuscle:MS003901	0.924189			Low:High:Low:CD4_p_helperT:MS002801	0.972727			Low:High:High:Inf_OAT017	0.876629
Low:High:Low:SkeltalMuscle:MS004901	0.927949			Low:High:Low:CD4_p_helperT:MS032001	0.906222			Low:High:High:Inf_NC004	0.804825
Low:High:Low:SkeltalMuscle:MS003301	0.833889			Low:High:Low:CD4_p_helperT:MS002701	0.948351			Low:High:High:Inf_OAT020	0.826354
Low:High:Low:SkeltalMuscle:MS004501	0.95			Low:High:Low:CD4_p_helperT:MS001001	0.964943			Low:High:High:Inf_OAT021	0.759566
Low:High:Low:SkeltalMuscle:MS003601	0.951613			Low:High:Low:CD4_p_helperT:MS003001	0.976286			Low:High:High:Inf_OAT015	0.840923
Low:High:Low:SkeltalMuscle:MS001201	0.96			Low:High:Low:CD4_p_helperT:MS017605	0.887931			Low:High:High:Inf_NC008	0.938905
Low:High:Low:SkeltalMuscle:MS001701	0.88641			Low:High:Low:CD4_p_helperT:MS000801	0.938082			Low:High:High:Inf_NC004	0.883957
Low:High:Low:SkeltalMuscle:MS003901	0.942549			Low:High:Low:CD4_p_helperT:MS000901	0.915714			Low:High:High:Inf_NC002	0.91752
Low:High:Low:SkeltalMuscle:MS004901	0.953333			Low:High:Low:CD4_p_helperT:MS001101	0.977381			Low:High:High:Inf_OAT017	0.948098
Low:High:Low:SkeltalMuscle:MS003301	1			Low:High:Low:CD4_p_helperT:MS007903	0.984194			Low:High:High:Inf_NC008	0.855672
Low:High:Low:SkeltalMuscle:MS004501	0.8475			Low:High:Low:CD4_p_helperT:MS002401	0.968814			Low:High:High:Inf_OAT015	0.902018
Low:High:Low:SkeltalMuscle:MS005101	0.944583			Low:High:Low:CD4_p_helperT:MS002501	0.96641			Low:High:High:Inf_OAT021	0.84453
Low:High:Low:SkeltalMuscle:MS004701	0.895833			Low:High:Low:CD4_p_helperT:MS000601	0.9348			Low:High:High:Inf_OAT020	0.937104
Low:High:Low:SkeltalMuscle:MS005001	0.941667			Low:High:Low:CD4_p_helperT:MS000401	0.968667			Low:High:High:Inf_OAT018	0.852726
Low:High:Low:SkeltalMuscle:MS001301	0.918333			Low:High:Low:CD4_p_helperT:MS002601	0.95662			Low:High:High:Inf_NC007	0.989583
Low:High:Low:SkeltalMuscle:MS001501	0.93475			Low:High:Low:CD4_p_helperT:MS000501	0.922674			Low:High:High:Inf_NC005	0.926603
Low:High:Low:SkeltalMuscle:MS001801	0.87625			Low:High:High:CD4_p_helperT:MS003001	1			Low:High:High:Inf_OAT019	0.717036
Low:High:Low:SkeltalMuscle:MS003701	0.920851			Low:High:High:CD4_p_helperT:MS002701	0.988784			Low:High:High:Inf_OAT017	0.89237
Low:High:Low:SkeltalMuscle:MS001901	0.925676			Low:High:High:CD4_p_helperT:MS032001	0.941205			Low:High:High:Inf_NC004	0.666838
Low:High:Low:SkeltalMuscle:MS003901	0.951538			Low:High:High:CD4_p_helperT:MS001001	0.980149			Low:High:High:Inf_NC002	0.89028
Low:High:Low:SkeltalMuscle:MS001201	0.963238			Low:High:High:CD4_p_helperT:MS000901	0.97989			Low:High:High:Inf_OAT021	0.801682
Low:High:Low:SkeltalMuscle:MS001701	0.927727			Low:High:High:CD4_p_helperT:MS001101	0.921111			Low:High:High:Inf_OAT020	0.884144
Low:High:Low:SkeltalMuscle:MS003601	0.942308			Low:High:High:CD4_p_helperT:MS000801	0.987297			Low:High:High:Inf_NC008	0.866525
Low:High:Low:SkeltalMuscle:MS004501	0.980769			Low:High:High:CD4_p_helperT:MS017605	0.967917			Low:High:High:Inf_OAT015	0.905641
Low:High:Low:SkeltalMuscle:MS004901	0.931667			Low:High:High:CD4_p_helperT:MS000701	0.978571			Low:High:High:Inf_NC007	0.875
Low:High:Low:SkeltalMuscle:MS003301	0.88			Low:High:High:CD4_p_helperT:MS002801	0.979615			Low:High:High:Inf_NC005	0.834311
Low:High:Low:SkeltalMuscle:MS005001	0.952407			Low:High:High:CD4_p_helperT:MS002901	0.985513			Low:High:High:Inf_OAT018	0.816583
Low:High:Low:SkeltalMuscle:MS001301	0.907218			Low:High:High:CD4_p_helperT:MS000401	0.992667			Low:High:High:Inf_OAT019	0.630103
Low:High:Low:SkeltalMuscle:MS004701	0.956111			Low:High:High:CD4_p_helperT:MS000501	0.979516			Low:High:High:Inf_NC004	0.737089
Low:High:Low:SkeltalMuscle:MS005101	1			Low:High:High:CD4_p_helperT:MS002601	0.997381			Low:High:High:Inf_OAT017	0.778842
Low:High:Low:SkeltalMuscle:MS001901	0.926981			Low:High:High:CD4_p_helperT:MS002401	0.959831			Low:High:High:Inf_NC002	0.903011
Low:High:Low:SkeltalMuscle:MS003701	0.954091			Low:High:High:CD4_p_helperT:MS007903	1			Low:High:High:Inf_OAT021	0.852941
Low:High:Low:SkeltalMuscle:MS001501	0.928533			Low:High:High:CD4_p_helperT:MS000601	0.902			Low:High:High:Inf_OAT020	0.843243
Low:High:Low:SkeltalMuscle:MS001801	0.909811			Low:High:High:CD4_p_helperT:MS002501	0.961538			Low:High:High:Inf_NC008	0.837013
Low:High:Low:SkeltalMuscle:MS001701	0.744964			Low:High:High:CD4_p_helperT:MS000401	0.990278			Low:High:High:Inf_OAT015	0.858426
Low:High:Low:SkeltalMuscle:MS001201	0.768917			Low:High:High:CD4_p_helperT:MS000501	0.937			Low:High:High:Inf_NC005	0.821707
Low:High:Low:SkeltalMuscle:MS003601	0.795467			Low:High:High:CD4_p_helperT:MS002601	0.883			Low:High:High:Inf_NC007	0.735714
Low:High:Low:SkeltalMuscle:MS003901	0.773376			Low:High:High:CD4_p_helperT:MS007903	0.976744			Low:High:High:Inf_OAT018	0.935177
Low:High:Low:SkeltalMuscle:MS004501	0.888293			Low:High:High:CD4_p_helperT:MS002401	0.978923			Low:High:High:Inf_OAT019	0.822958
Low:High:Low:SkeltalMuscle:MS004901	0.675913			Low:High:High:CD4_p_helperT:MS000601	0.959667			Low:High:High:Inf_OAT018	0.853708
Low:High:Low:SkeltalMuscle:MS003301	0.9			Low:High:High:CD4_p_helperT:MS002501	0.996154			Low:High:High:Inf_NC007	0.882222
Low:High:Low:SkeltalMuscle:MS004701	0.76439			Low:High:High:CD4_p_helperT:MS003001	0.97			Low:High:High:Inf_NC005	0.910229
Low:High:Low:SkeltalMuscle:MS005001	0.708235			Low:High:High:CD4_p_helperT:MS001001	0.992447			Low:High:High:Inf_OAT019	0.602183
Low:High:Low:SkeltalMuscle:MS001301	0.947886			Low:High:High:CD4_p_helperT:MS002701	0.9725			Low:High:High:Inf_NC002	0.884179
Low:High:Low:SkeltalMuscle:MS005101	0.323125			Low:High:High:CD4_p_helperT:MS032001	0.949219			Low:High:High:Inf_NC004	0.800008
Low:High:Low:SkeltalMuscle:MS003701	0.800743			Low:High:High:CD4_p_helperT:MS001101	0.977692			Low:High:High:Inf_OAT017	0.839066
Low:High:Low:SkeltalMuscle:MS001901	0.599474			Low:High:High:CD4_p_helperT:MS000901	0.954945			Low:High:High:Inf_NC008	0.869523
Low:High:Low:SkeltalMuscle:MS001801	0.933333			Low:High:High:CD4_p_helperT:MS017605	0.931471			Low:High:High:Inf_OAT015	0.916077
Low:High:Low:SkeltalMuscle:MS001501	0.787975			Low:High:High:CD4_p_helperT:MS000801	0.957			Low:High:High:Inf_OAT021	0.769979
Low:High:High:SkeltalMuscle:MS005101	0.852273			Low:High:High:CD4_p_helperT:MS000701	0.984706			Low:High:High:Inf_OAT020	0.881932
Low:High:High:SkeltalMuscle:MS004701	0.899091			Low:High:High:CD4_p_helperT:MS002801	0.914561			Low:High:High:Inf_OAT021	0.685714
Low:High:High:SkeltalMuscle:MS005001	0.879538			Low:High:High:CD4_p_helperT:MS002901	0.986333			Low:High:High:Inf_OAT020	0.842061
Low:High:High:SkeltalMuscle:MS001301	0.863684			Low:High:High:CD4_p_helperT:MS007903	0.947872			Low:High:High:Inf_NC008	0.557453
Low:High:High:SkeltalMuscle:MS001501	0.91			Low:High:High:CD4_p_helperT:MS002401	0.887475			Low:High:High:Inf_OAT015	0.697506
Low:High:High:SkeltalMuscle:MS001801	0.906078			Low:High:High:CD4_p_helperT:MS000601	0.8726			Low:High:High:Inf_NC002	0.54381
Low:High:High:SkeltalMuscle:MS003701	0.92459			Low:High:High:CD4_p_helperT:MS002501	0.990196			Low:High:High:Inf_OAT017	0.869947
Low:High:High:SkeltalMuscle:MS001901	0.838936			Low:High:High:CD4_p_helperT:MS000401	0.954103			Low:High:High:Inf_NC004	0.49416
Low:High:High:SkeltalMuscle:MS001701	0.877619			Low:High:High:CD4_p_helperT:MS000501	0.913544			Low:High:High:Inf_OAT019	0.444958
Low:High:High:SkeltalMuscle:MS001201	0.84			Low:High:High:CD4_p_helperT:MS002601	0.9			Low:High:High:Inf_NC007	0.86381
Low:High:High:SkeltalMuscle:MS003601	0.898696			Low:High:High:CD4_p_helperT:MS000701	0.916408			Low:High:High:Inf_NC005	0.838722
Low:High:High:SkeltalMuscle:MS003901	0.874528			Low:High:High:CD4_p_helperT:MS002801	0.8875			Low:High:High:Inf_OAT018	0.764766
Low:High:High:SkeltalMuscle:MS004901	0.901636			Low:High:High:CD4_p_helperT:MS002901	0.919063			Low:High:High:Inf_NC007	0.991228
Low:High:High:SkeltalMuscle:MS003301	0.976667			Low:High:High:CD4_p_helperT:MS003001	0.931053			Low:High:High:Inf_NC005	0.933668
Low:High:High:SkeltalMuscle:MS004501	0.879032			Low:High:High:CD4_p_helperT:MS002701	0.925952			Low:High:High:Inf_OAT018	0.936508
Low:High:High:SkeltalMuscle:MS005101	0.969512			Low:High:High:CD4_p_helperT:MS032001	0.881622			Low:High:High:Inf_OAT019	0.949729
Low:High:High:SkeltalMuscle:MS004701	0.935517			Low:High:High:CD4_p_helperT:MS001001	0.937083			Low:High:High:Inf_NC002	0.944099
Low:High:High:SkeltalMuscle:MS001301	0.952459			Low:High:High:CD4_p_helperT:MS000901	0.952364			Low:High:High:Inf_NC004	0.934868
Low:High:High:SkeltalMuscle:MS005001	0.94163			Low:High:High:CD4_p_helperT:MS001101	0.923582			Low:High:High:Inf_OAT017	0.877816
Low:High:High:SkeltalMuscle:MS001801	0.927742			Low:High:High:CD4_p_helperT:MS000801	0.876628			Low:High:High:Inf_OAT021	0.855844
Low:High:High:SkeltalMuscle:MS001501	0.964884			Low:High:High:CD4_p_helperT:MS017605	0.87925			Low:High:High:Inf_OAT020	0.940017
Low:High:High:SkeltalMuscle:MS003701	0.939043			Low:High:High:CD4_p_helperT:MS000601	0.983871			Low:High:High:Inf_NC008	0.892105
Low:High:High:SkeltalMuscle:MS001901	0.962208			Low:High:High:CD4_p_helperT:MS002501	0.99			Low:High:High:Inf_OAT015	0.894486
Low:High:High:SkeltalMuscle:MS001201	0.930789			Low:High:High:CD4_p_helperT:MS002401	0.982338			Low:High:High:Inf_NC004	0.868003
Low:High:High:SkeltalMuscle:MS001701	0.933951			Low:High:High:CD4_p_helperT:MS007903	1			Low:High:High:Inf_NC002	0.886196
Low:High:High:SkeltalMuscle:MS003601	0.948276			Low:High:High:CD4_p_helperT:MS000501	0.960606			Low:High:High:Inf_OAT017	0.892139
Low:High:High:SkeltalMuscle:MS003901	0.95337			Low:High:High:CD4_p_helperT:MS002601	0.938974			Low:High:High:Inf_OAT020	0.904551
Low:High:High:SkeltalMuscle:MS003301	0.949167			Low:High:High:CD4_p_helperT:MS000401	0.972586			Low:High:High:Inf_OAT021	0.876242
Low:High:High:SkeltalMuscle:MS004901	0.962609			Low:High:High:CD4_p_helperT:MS002801	0.955224			Low:High:High:Inf_OAT015	0.905486
Low:High:High:SkeltalMuscle:MS004501	0.942895			Low:High:High:CD4_p_helperT:MS002901	0.961846			Low:High:High:Inf_NC008	0.866109
Low:High:High:SkeltalMuscle:MS001701	0.901918			Low:High:High:CD4_p_helperT:MS000701	0.963415			Low:High:High:Inf_NC005	0.914622
Low:High:High:SkeltalMuscle:MS003601	0.909091			Low:High:High:CD4_p_helperT:MS000901	1			Low:High:High:Inf_NC007	0.938889
Low:High:High:SkeltalMuscle:MS001201	0.912083			Low:High:High:CD4_p_helperT:MS001101	0.971429			Low:High:High:Inf_OAT018	0.922759
Low:High:High:SkeltalMuscle:MS003901	0.941531			Low:High:High:CD4_p_helperT:MS000801	0.952935			Low:High:High:Inf_OAT019	0.803664
Low:High:High:SkeltalMuscle:MS004501	1			Low:High:High:CD4_p_helperT:MS017605	0.952381			Low:High:High:Inf_OAT018	0.787426
Low:High:High:SkeltalMuscle:MS004901	0.915672			Low:High:High:CD4_p_helperT:MS003001	0.972222			Low:High:High:Inf_NC005	0.768033
Low:High:High:SkeltalMuscle:MS003301	0.972973			Low:High:High:CD4_p_helperT:MS032001	0.9275			Low:High:High:Inf_NC007	0.84
Low:High:High:SkeltalMuscle:MS004701	0.893836			Low:High:High:CD4_p_helperT:MS002701	0.949787			Low:High:High:Inf_OAT019	0.76627
Low:High:High:SkeltalMuscle:MS005001	0.92			Low:High:High:CD4_p_helperT:MS001001	0.968283			Low:High:High:Inf_NC002	0.845467
Low:High:High:SkeltalMuscle:MS001301	0.927284			Low:High:High:CD4_p_helperT:MS002501	0.962963			Low:High:High:Inf_NC004	0.865
Low:High:High:SkeltalMuscle:MS005101	0.885714			Low:High:High:CD4_p_helperT:MS000601	0.981013			Low:High:High:Inf_OAT017	0.843627
Low:High:High:SkeltalMuscle:MS003701	0.9175			Low:High:High:CD4_p_helperT:MS002401	0.9196			Low:High:High:Inf_NC008	0.833531
Low:High:High:SkeltalMuscle:MS001901	0.937778			Low:High:High:CD4_p_helperT:MS007903	0.96			Low:High:High:Inf_OAT015	0.803777
Low:High:High:SkeltalMuscle:MS001501	0.942429			Low:High:High:CD4_p_helperT:MS002601	0.962264			Low:High:High:Inf_OAT021	0.849896
Low:High:High:SkeltalMuscle:MS001801	0.840408			Low:High:High:CD4_p_helperT:MS000501	0.962264			Low:High:High:Inf_OAT020	0.771221
Low:High:High:SkeltalMuscle:MS003901	0.853103			Low:High:High:CD4_p_helperT:MS000401	0.984462			Low:High:High:Inf_OAT018	0.846886
Low:High:High:SkeltalMuscle:MS001701	0.86			Low:High:High:CD4_p_helperT:MS002901	0.937576			Low:High:High:Inf_NC005	0.895265
Low:High:High:SkeltalMuscle:MS003601	0.875			Low:High:High:CD4_p_helperT:MS002801	0.971154			Low:High:High:Inf_NC007	0.749026
Low:High:High:SkeltalMuscle:MS001201	0.834717			Low:High:High:CD4_p_helperT:MS000701	0.975965			Low:High:High:Inf_OAT019	0.575677
Low:High:High:SkeltalMuscle:MS004501	0.836333			Low:High:High:CD4_p_helperT:MS017605	0.979			Low:High:High:Inf_NC002	0.905629
Low:High:High:SkeltalMuscle:MS004901	0.807674			Low:High:High:CD4_p_helperT:MS000801	0.995283			Low:High:High:Inf_NC004	0.501214
Low:High:High:SkeltalMuscle:MS003301	0.922619			Low:High:High:CD4_p_helperT:MS001101	0.951613			Low:High:High:Inf_OAT017	0.898363
Low:High:High:SkeltalMuscle:MS005001	0.904156			Low:High:High:CD4_p_helperT:MS000901	0.954545			Low:High:High:Inf_NC008	0.832592
Low:High:High:SkeltalMuscle:MS001301	0.860278			Low:High:High:CD4_p_helperT:MS001001	0.968824			Low:High:High:Inf_OAT015	0.891734
Low:High:High:SkeltalMuscle:MS004701	0.960882			Low:High:High:CD4_p_helperT:MS002701	0.987143			Low:High:High:Inf_OAT021	0.739725
Low:High:High:SkeltalMuscle:MS005101	0.972222			Low:High:High:CD4_p_helperT:MS032001	0.963977			Low:High:High:Inf_OAT020	0.819924
Low:High:High:SkeltalMuscle:MS001901	0.976667			Low:High:High:CD4_p_helperT:MS003001	1			Low:High:High:Inf_OAT015	0.906446
Low:High:High:SkeltalMuscle:MS003701	0.848873			Low:High:High:CD4_p_helperT:MS007903	0.979			Low:High:High:Inf_NC008	0.870977
Low:High:High:SkeltalMuscle:MS001801	0.849063			Low:High:High:CD4_p_helperT:MS002401	0.93775			Low:High:High:Inf_OAT020	0.867516
Low:High:High:SkeltalMuscle:MS001501	0.908919			Low:High:High:CD4_p_helperT:MS002501	0.966667			Low:High:High:Inf_OAT021	0.927947
Low:High:High:SkeltalMuscle:MS004501	1			Low:High:High:CD4_p_helperT:MS000601	0.939483			Low:High:High:Inf_NC004	0.843158
Low:High:High:SkeltalMuscle:MS004901	0.929545			Low:High:High:CD4_p_helperT:MS000401	0.962			Low:High:High:Inf_NC002	0.914067
Low:High:High:SkeltalMuscle:MS003301	1			Low:High:High:CD4_p_helperT:MS002601	0.954545			Low:High:High:Inf_OAT017	0.798891
Low:High:High:SkeltalMuscle:MS003901	0.979535			Low:High:High:CD4_p_helperT:MS000501	0.940312			Low:High:High:Inf_OAT019	0.754085
Low:High:High:SkeltalMuscle:MS001701	0.941702			Low:High:High:CD4_p_helperT:MS000701	0.929821			Low:High:High:Inf_OAT018	0.879943
Low:High:High:SkeltalMuscle:MS003601	0.882353			Low:High:High:CD4_p_helperT:MS002901	0.933333			Low:High:High:Inf_NC005	0.881468
Low:High:High:SkeltalMuscle:MS001201	0.905862			Low:High:High:CD4_p_helperT:MS002801	0.954211			Low:High:High:Inf_NC007	0.988889
Low:High:High:SkeltalMuscle:MS001901	0.990294			Low:High:High:CD4_p_helperT:MS002701	0.986111			Low:High:High:Inf_NC002	0.878493
Low:High:High:SkeltalMuscle:MS003701	0.972969			Low:High:High:CD4_p_helperT:MS032001	0.903571			Low:High:High:Inf_NC004	0.736529
Low:High:High:SkeltalMuscle:MS001801	0.9055			Low:High:High:CD4_p_helperT:MS001001	0.976562			Low:High:High:Inf_OAT017	0.784218
Low:High:High:SkeltalMuscle:MS001501	0.98274			Low:High:High:CD4_p_helperT:MS003001	0.977021			Low:High:High:Inf_OAT015	0.843768
Low:High:High:SkeltalMuscle:MS005001	0.949808			Low:High:High:CD4_p_helperT:MS000801	0.989688			Low:High:High:Inf_NC008	0.937076
Low:High:High:SkeltalMuscle:MS001301	0.934898			Low:High:High:CD4_p_helperT:MS017605	1			Low:High:High:Inf_OAT020	0.884947
Low:High:High:SkeltalMuscle:MS004701	0.9335			Low:High:High:CD4_p_helperT:MS000901	0.99			Low:High:High:Inf_OAT021	0.790873
Low:High:High:SkeltalMuscle:MS005101	1			Low:High:High:CD4_p_helperT:MS001101	0.930571			Low:High:High:Inf_OAT018	0.909172
Low:High:High:SkeltalMuscle:MS001301	0.975484			Low:High:High:CD4_p_helperT:MS000901	0.927561			Low:High:High:Inf_NC005	0.864627
Low:High:High:SkeltalMuscle:MS005001	0.929252			Low:High:High:CD4_p_helperT:MS001101	0.956667			Low:High:High:Inf_NC007	0.885348
Low:High:High:SkeltalMuscle:MS004701	0.9445			Low:High:High:CD4_p_helperT:MS000801	0.883924			Low:High:High:Inf_OAT019	0.650267
Low:High:High:SkeltalMuscle:MS005101	0.966667			Low:High:High:CD4_p_helperT:MS017605	0.848214			Low:High:High:Inf_OAT015	0.942857
Low:High:High:SkeltalMuscle:MS001901	0.730667			Low:High:High:CD4_p_helperT:MS003001	0.921053			Low:High:High:Inf_NC008	0.880582
Low:High:High:SkeltalMuscle:MS003701	0.961368			Low:High:High:CD4_p_helperT:MS032001	0.881458			Low:High:High:Inf_OAT020	0.935259
Low:High:High:SkeltalMuscle:MS001801	0.916			Low:High:High:CD4_p_helperT:MS002701	0.9388			Low:High:High:Inf_OAT021	0.868966
Low:High:High:SkeltalMuscle:MS001501	0.967391			Low:High:High:CD4_p_helperT:MS001001	0.906053			Low:High:High:Inf_NC002	0.864118
Low:High:High:SkeltalMuscle:MS003901	0.941915			Low:High:High:CD4_p_helperT:MS002801	1			Low:High:High:Inf_NC004	0.874064
Low:High:High:SkeltalMuscle:MS003601	0.987308			Low:High:High:CD4_p_helperT:MS002901	0.9725			Low:High:High:Inf_OAT017	0.945415
Low:High:High:SkeltalMuscle:MS001701	1			Low:High:High:CD4_p_helperT:MS000701	0.902941			Low:High:High:Inf_OAT019	0.802927
Low:High:High:SkeltalMuscle:MS001201	0.929178			Low:High:High:CD4_p_helperT:MS000501	0.9375			Low:High:High:Inf_OAT018	0.874191
Low:High:High:SkeltalMuscle:MS004501	0.957447			Low:High:High:CD4_p_helperT:MS002601	0.939333			Low:High:High:Inf_NC005	0.871287
Low:High:High:SkeltalMuscle:MS003301	0.948718			Low:High:High:CD4_p_helperT:MS000401	0.975556			Low:High:High:Inf_NC007	0.952381
Low:High:High:SkeltalMuscle:MS004901	0.959348			Low:High:High:CD4_p_helperT:MS000601	0.960303			Low:High:High:Inf_NC002	0.882493
Low:High:High:SkeltalMuscle:MS001501	0.949881			Low:High:High:CD4_p_helperT:MS002501	0.96			Low:High:High:Inf_OAT017	0.829978
Low:High:High:SkeltalMuscle:MS001801	0.930556			Low:High:High:CD4_p_helperT:MS007903	0.916667			Low:High:High:Inf_NC004	0.901813
Low:High:High:SkeltalMuscle:MS001901	0.917288			Low:High:High:CD4_p_helperT:MS002401	0.902273			Low:High:High:Inf_OAT021	0.789943
Low:High:High:SkeltalMuscle:MS003701	0.906162			Low:High:High:CD4_p_helperT:MS002501	1			Low:High:High:Inf_OAT020	0.866662
Low:High:High:SkeltalMuscle:MS005101	0.970588			Low:High:High:CD4_p_helperT:MS000601	0.928837			Low:High:High:Inf_NC008	0.899306
Low:High:High:SkeltalMuscle:MS005001	0.939278			Low:High:High:CD4_p_helperT:MS007903	0.953488			Low:High:High:Inf_OAT015	0.943759
Low:High:High:SkeltalMuscle:MS001301	0.850935			Low:High:High:CD4_p_helperT:MS002401	0.983607			Low:High:High:Inf_NC005	0.887351
Low:High:High:SkeltalMuscle:MS004701	0.908246			Low:High:High:CD4_p_helperT:MS002601	0.970548			Low:High:High:Inf_NC007	0.886667
Low:High:High:SkeltalMuscle:MS004901	0.943148			Low:High:High:CD4_p_helperT:MS000501	0.94037			Low:High:High:Inf_OAT018	0.939153
Low:High:High:SkeltalMuscle:MS003301	0.851944			Low:High:High:CD4_p_helperT:MS000401	0.988235			Low:High:High:Inf_OAT019	0.858211
Low:High:High:SkeltalMuscle:MS004501	0.8228			Low:High:High:CD4_p_helperT:MS002901	0.92			Low:High:High:Inf_NC008	0.907813
Low:High:High:SkeltalMuscle:MS003901	0.900267			Low:High:High:CD4_p_helperT:MS002801	0.98625			Low:High:High:Inf_OAT015	0.84949
Low:High:High:SkeltalMuscle:MS001701	0.855514			Low:High:High:CD4_p_helperT:MS000701	0.948718			Low:High:High:Inf_OAT021	0.737729
Low:High:High:SkeltalMuscle:MS001201	0.919038			Low:High:High:CD4_p_helperT:MS017605	0.991071			Low:High:High:Inf_OAT020	0.892549
Low:High:High:SkeltalMuscle:MS003601	0.833333			Low:High:High:CD4_p_helperT:MS000801	0.970313			Low:High:High:Inf_NC004	0.855026
Low:High:High:SkeltalMuscle:MS001901	0.755833			Low:High:High:CD4_p_helperT:MS001101	1			Low:High:High:Inf_NC002	0.834869
Low:High:High:SkeltalMuscle:MS003701	0.843676			Low:High:High:CD4_p_helperT:MS000901	0.993913			Low:High:High:Inf_OAT017	0.890476
Low:High:High:SkeltalMuscle:MS001801	0.80186			Low:High:High:CD4_p_helperT:MS001001	0.952982			Low:High:High:Inf_OAT019	0.763228
Low:High:High:SkeltalMuscle:MS001501	0.880667			Low:High:High:CD4_p_helperT:MS032001	0.962			Low:High:High:Inf_OAT018	0.966138
Low:High:High:SkeltalMuscle:MS001301	0.800233			Low:High:High:CD4_p_helperT:MS002701	0.986486			Low:High:High:Inf_NC005	0.88835
Low:High:High:SkeltalMuscle:MS005001	0.676333			Low:High:High:CD4_p_helperT:MS003001	1			Low:High:High:Inf_NC007	0.909091
Low:High:High:SkeltalMuscle:MS004701	0.847222			Low:High:High:CD4_p_helperT:MS002801	0.98			Low:High:High:Inf_OAT020	0.882011
Low:High:High:SkeltalMuscle:MS005101	0.76129			Low:High:High:CD4_p_helperT:MS002901	0.939286			Low:High:High:Inf_OAT021	0.879063
Low:High:High:SkeltalMuscle:MS004501	0.846154			Low:High:High:CD4_p_helperT:MS000701	0.978654			Low:High:High:Inf_OAT015	0.889097
Low:High:High:SkeltalMuscle:MS003301	0.75			Low:High:High:CD4_p_helperT:MS000901	0.973659			Low:High:High:Inf_NC008	0.882364
Low:High:High:SkeltalMuscle:MS004901	0.825088			Low:High:High:CD4_p_helperT:MS001101	0.958649			Low:High:High:Inf_NC002	0.877294
Low:High:High:SkeltalMuscle:MS003901	0.76825			Low:High:High:CD4_p_helperT:MS017605	0.9736			Low:High:High:Inf_NC004	0.788842
Low:High:High:SkeltalMuscle:MS001201	0.823864			Low:High:High:CD4_p_helperT:MS000801	0.94375			Low:High:High:Inf_OAT017	0.815422
Low:High:High:SkeltalMuscle:MS001701	0.824737			Low:High:High:CD4_p_helperT:MS003001	0.9375			Low:High:High:Inf_OAT019	0.742596
Low:High:High:SkeltalMuscle:MS003601	0.862059			Low:High:High:CD4_p_helperT:MS032001	0.94541			Low:High:High:Inf_NC007	0.892262
Low:High:High:SkeltalMuscle:MS003901	0.902991			Low:High:High:CD4_p_helperT:MS002701	0.970149			Low:High:High:Inf_NC005	0.885012
Low:High:High:SkeltalMuscle:MS003601	0.76			Low:High:High:CD4_p_helperT:MS001001	0.975532			Low:High:High:Inf_OAT018	0.919697
Low:High:High:SkeltalMuscle:MS001701	0.937736			Low:High:High:CD4_p_helperT:MS000601	0.994928			Low:High:High:Inf_NC002	0.865807
Low:High:High:SkeltalMuscle:MS001201	0.859333			Low:High:High:CD4_p_helperT:MS002501	0.92			Low:High:High:Inf_NC004	0.797669
Low:High:High:SkeltalMuscle:MS004501	0.883148			Low:High:High:CD4_p_helperT:MS007903	0.946429			Low:High:High:Inf_OAT017	0.902203
Low:High:High:SkeltalMuscle:MS004901	0.877899			Low:High:High:CD4_p_helperT:MS002401	0.967867			Low:High:High:Inf_NC008	0.897669
Low:High:High:SkeltalMuscle:MS003301	0.858974			Low:High:High:CD4_p_helperT:MS000501	0.975581			Low:High:High:Inf_OAT015	0.867394
Low:High:High:SkeltalMuscle:MS005001	0.882523			Low:High:High:CD4_p_helperT:MS002601	0.937273			Low:High:High:Inf_OAT021	0.819234
Low:High:High:SkeltalMuscle:MS001301	0.874909			Low:High:High:CD4_p_helperT:MS000401	0.960274			Low:High:High:Inf_OAT020	0.881884
Low:High:High:SkeltalMuscle:MS004701	0.839302			Low:High:High:CD4_p_helperT:MS000901	0.964091			Low:High:High:Inf_OAT018	0.941752
Low:High:High:SkeltalMuscle:MS005101	0.803922			Low:High:High:CD4_p_helperT:MS001101	0.967121			Low:High:High:Inf_NC005	0.865298
Low:High:High:SkeltalMuscle:MS001901	0.9064			Low:High:High:CD4_p_helperT:MS000801	0.971398			Low:High:High:Inf_NC007	0.971429
Low:High:High:SkeltalMuscle:MS003701	0.909813			Low:High:High:CD4_p_helperT:MS017605	0.96973			Low:High:High:Inf_OAT019	0.741014
Low:High:High:SkeltalMuscle:MS001801	0.928			Low:High:High:CD4_p_helperT:MS003001	0.97549			Low:High:High:Inf_NC008	0.893955
Low:High:High:SkeltalMuscle:MS001501	0.928654			Low:High:High:CD4_p_helperT:MS002701	0.99463			Low:High:High:Inf_OAT015	0.929955
Low:High:High:SkeltalMuscle:MS001701	0.88			Low:High:High:CD4_p_helperT:MS032001	0.962727			Low:High:High:Inf_OAT021	0.926358
Low:High:High:SkeltalMuscle:MS003601	0.909412			Low:High:High:CD4_p_helperT:MS001001	0.970959			Low:High:High:Inf_OAT020	0.905062
Low:High:High:SkeltalMuscle:MS001201	0.918529			Low:High:High:CD4_p_helperT:MS002801	0.977971			Low:High:High:Inf_NC002	0.922545
Low:High:High:SkeltalMuscle:MS003901	0.939118			Low:High:High:CD4_p_helperT:MS002901	0.949538			Low:High:High:Inf_NC004	0.802175
Low:High:High:SkeltalMuscle:MS004501	0.916667			Low:High:High:CD4_p_helperT:MS000701	0.977353			Low:High:High:Inf_OAT017	0.905913
Low:High:High:SkeltalMuscle:MS003301	1			Low:High:High:CD4_p_helperT:MS000501	0.974124			Low:High:High:Inf_OAT019	0.889961
Low:High:High:SkeltalMuscle:MS004901	0.926133			Low:High:High:CD4_p_helperT:MS002601	0.969231			Low:High:High:Inf_OAT018	0.903831
Low:High:High:SkeltalMuscle:MS004701	0.900714			Low:High:High:CD4_p_helperT:MS000401	0.970933			Low:High:High:Inf_NC005	0.918625
Low:High:High:SkeltalMuscle:MS001301	0.958936			Low:High:High:CD4_p_helperT:MS000601	0.92			Low:High:High:Inf_NC007	0.989583
Low:High:High:SkeltalMuscle:MS005001	0.925217			Low:High:High:CD4_p_helperT:MS002501	0.955			Low:High:High:Inf_OAT018	0.900567
Low:High:High:SkeltalMuscle:MS005101	0.966667			Low:High:High:CD4_p_helperT:MS002401	0.988049			Low:High:High:Inf_NC007	0.970833
Low:High:High:SkeltalMuscle:MS003701	0.950741			Low:High:High:CD4_p_helperT:MS007903	0.944444			Low:High:High:Inf_NC005	0.88976
Low:High:High:SkeltalMuscle:MS001901	0.939444			Low:High:High:CD4_p_helperT:MS003001	1			Low:High:High:Inf_OAT019	0.611168
Low:High:High:SkeltalMuscle:MS001501	0.9518			Low:High:High:CD4_p_helperT:MS001001	0.974384			Low:High:High:Inf_NC004	0.554328
Low:High:High:SkeltalMuscle:MS001801	0.942903			Low:High:High:CD4_p_helperT:MS002701	0.973735			Low:High:High:Inf_NC002	0.858499
Low:High:High:SkeltalMuscle:MS001901	0.967879			Low:High:High:CD4_p_helperT:MS032001	0.966081			Low:High:High:Inf_OAT017	0.820399
Low:High:High:SkeltalMuscle:MS003701	0.941212			Low:High:High:CD4_p_helperT:MS001101	0.983333			Low:High:High:Inf_NC008	0.865268
Low:High:High:SkeltalMuscle:MS001801	0.967742			Low:High:High:CD4_p_helperT:MS000901	0.977317			Low:High:High:Inf_OAT015	0.891829
Low:High:High:SkeltalMuscle:MS001501	0.965714			Low:High:High:CD4_p_helperT:MS000801	0.970865			Low:High:High:Inf_OAT021	0.823613
Low:High:High:SkeltalMuscle:MS001301	0.945294			Low:High:High:CD4_p_helperT:MS017605	0.863636			Low:High:High:Inf_OAT020	0.88076
Low:High:High:SkeltalMuscle:MS005001	0.9272			Low:High:High:CD4_p_helperT:MS000701	0.971635			Low:High:High:Inf_NC004	0.8
Low:High:High:SkeltalMuscle:MS004701	0.861111			Low:High:High:CD4_p_helperT:MS002801	0.973467			Low:High:High:Inf_OAT017	0.845963
Low:High:High:SkeltalMuscle:MS005101	0.893611			Low:High:High:CD4_p_helperT:MS002901	0.985294			Low:High:High:Inf_NC002	0.8479
Low:High:High:SkeltalMuscle:MS004501	0.674545			Low:High:High:CD4_p_helperT:MS000401	0.984848			Low:High:High:Inf_OAT015	0.916063
Low:High:High:SkeltalMuscle:MS003301	0.911765			Low:High:High:CD4_p_helperT:MS000501	0.921875			Low:High:High:Inf_NC008	0.901315
Low:High:High:SkeltalMuscle:MS004901	0.918523			Low:High:High:CD4_p_helperT:MS002601	0.954615			Low:High:High:Inf_OAT020	0.979487
Low:High:High:SkeltalMuscle:MS003901	0.902045			Low:High:High:CD4_p_helperT:MS002401	0.967705			Low:High:High:Inf_OAT021	0.900222
Low:High:High:SkeltalMuscle:MS001701	0.796076			Low:High:High:CD4_p_helperT:MS007903	1			Low:High:High:Inf_OAT018	0.891604
Low:High:High:SkeltalMuscle:MS001201	0.722593			Low:High:High:CD4_p_helperT:MS000601	0.99825			Low:High:High:Inf_NC005	0.916206
Low:High:High:SkeltalMuscle:MS003601	0.897059			Low:High:High:CD4_p_helperT:MS002501	0.960714			Low:High:High:Inf_NC007	0.835034
Low:High:High:SkeltalMuscle:MS001801	0.916774			Low:High:High:CD4_p_helperT:MS003001	1			Low:High:High:Inf_OAT019	0.886084
Low:High:High:SkeltalMuscle:MS001501	0.964			Low:High:High:CD4_p_helperT:MS032001	0.943014			Low:High:High:Inf_OAT018	0.889319
Low:High:High:SkeltalMuscle:MS001901	0.99			Low:High:High:CD4_p_helperT:MS002701	0.9375			Low:High:High:Inf_NC007	0.795387
Low:High:High:SkeltalMuscle:MS003701	0.952			Low:High:High:CD4_p_helperT:MS001001	0.989027			Low:High:High:Inf_NC005	0.817623
Low:High:High:SkeltalMuscle:MS005101	0.8585			Low:High:High:CD4_p_helperT:MS000901	0.974583			Low:High:High:Inf_OAT019	0.315457
Low:High:High:SkeltalMuscle:MS001301	0.9655			Low:High:High:CD4_p_helperT:MS001101	0.94375			Low:High:High:Inf_OAT017	0.889388
Low:High:High:SkeltalMuscle:MS005001	0.954717			Low:High:High:CD4_p_helperT:MS000801	0.951455			Low:High:High:Inf_NC002	0.856771
Low:High:High:SkeltalMuscle:MS004701	1			Low:High:High:CD4_p_helperT:MS017605	0.921053			Low:High:High:Inf_NC004	0.717955
Low:High:High:SkeltalMuscle:MS003301	0.636364			Low:High:High:CD4_p_helperT:MS000701	0.96907			Low:High:High:Inf_OAT015	0.878872
Low:High:High:SkeltalMuscle:MS004901	0.9285			Low:High:High:CD4_p_helperT:MS002801	0.916667			Low:High:High:Inf_NC008	0.876928
Low:High:High:SkeltalMuscle:MS004501	0.933333			Low:High:High:CD4_p_helperT:MS002901	1			Low:High:High:Inf_OAT020	0.877507
Low:High:High:SkeltalMuscle:MS003901	0.948478			Low:High:High:CD4_p_helperT:MS000401	0.982759			Low:High:High:Inf_OAT021	0.832187
Low:High:High:SkeltalMuscle:MS003601	0.9375			Low:High:High:CD4_p_helperT:MS000501	0.95283			Low:High:High:Inf_NC004	0.808589
Low:High:High:SkeltalMuscle:MS001701	0.972143			Low:High:High:CD4_p_helperT:MS002601	0.981707			Low:High:High:Inf_NC002	0.857107
Low:High:High:SkeltalMuscle:MS001201	0.929455			Low:High:High:CD4_p_helperT:MS002401	0.979538			Low:High:High:Inf_OAT017	0.778738
Low:High:High:SkeltalMuscle:MS004701	0.931818			Low:High:High:CD4_p_helperT:MS007903	1			Low:High:High:Inf_NC008	0.885555
Low:High:High:SkeltalMuscle:MS005001	0.934667			Low:High:High:CD4_p_helperT:MS000601	0.942258			Low:High:High:Inf_OAT015	0.837446
Low:High:High:SkeltalMuscle:MS001301	0.905357			Low:High:High:CD4_p_helperT:MS002501	0.772727			Low:High:High:Inf_OAT021	0.859869
Low:High:High:SkeltalMuscle:MS005101	0.825333			Low:High:High:CD4_p_helperT:MS003001	0.970395			Low:High:High:Inf_OAT020	0.862491
Low:High:High:SkeltalMuscle:MS003701	0.949894			Low:High:High:CD4_p_helperT:MS001001	0.989444			Low:High:High:Inf_OAT018	0.839147
Low:High:High:SkeltalMuscle:MS001901	0.944444			Low:High:High:CD4_p_helperT:MS032001	0.970444			Low:High:High:Inf_NC007	0.932576
Low:High:High:SkeltalMuscle:MS001501	0.938143			Low:High:High:CD4_p_helperT:MS002701	0.992063			Low:High:High:Inf_NC005	0.855277
Low:High:High:SkeltalMuscle:MS001801	0.935962			Low:High:High:CD4_p_helperT:MS001101	0.934211			Low:High:High:Inf_OAT019	0.770299
Low:High:High:SkeltalMuscle:MS003601	0.918571			Low:High:High:CD4_p_helperT:MS000901	0.947143			Low:High:High:Inf_NC008	0.879674
Low:High:High:SkeltalMuscle:MS001701	0.936667			Low:High:High:CD4_p_helperT:MS017605	0.978571			Low:High:High:Inf_OAT015	0.937252
Low:High:High:SkeltalMuscle:MS001201	0.963143			Low:High:High:CD4_p_helperT:MS000801	0.960667			Low:High:High:Inf_OAT021	0.831086
Low:High:High:SkeltalMuscle:MS003901	0.952169			Low:High:High:CD4_p_helperT:MS000701	0.959885			Low:High:High:Inf_OAT020	0.888399
Low:High:High:SkeltalMuscle:MS004501	0.995333			Low:High:High:CD4_p_helperT:MS002801	0.944444			Low:High:High:Inf_NC002	0.924318
Low:High:High:SkeltalMuscle:MS004901	0.943788			Low:High:High:CD4_p_helperT:MS002901	0.93697			Low:High:High:Inf_NC004	0.879996
Low:High:High:SkeltalMuscle:MS003301	1			Low:High:High:CD4_p_helperT:MS000401	0.93717			Low:High:High:Inf_OAT017	0.931607
Low:High:High:SkeltalMuscle:MS005101	0.916667			Low:High:High:CD4_p_helperT:MS000501	0.974576			Low:High:High:Inf_OAT019	0.796982
Low:High:High:SkeltalMuscle:MS004701	0.893939			Low:High:High:CD4_p_helperT:MS002601	0.974359			Low:High:High:Inf_OAT018	0.934836
Low:High:High:SkeltalMuscle:MS001301	0.919333			Low:High:High:CD4_p_helperT:MS002401	0.961			Low:High:High:Inf_NC007	0.948485
Low:High:High:SkeltalMuscle:MS005001	0.867931			Low:High:High:CD4_p_helperT:MS007903	1			Low:High:High:Inf_NC005	0.864973
Low:High:High:SkeltalMuscle:MS001501	0.849661			Low:High:High:CD4_p_helperT:MS000601	0.974906			Low:High:High:Inf_NC004	0.920261
Low:High:High:SkeltalMuscle:MS001801	0.914615			Low:High:High:CD4_p_helperT:MS002501	0.972895			Low:High:High:Inf_NC002	0.920394
Low:High:High:SkeltalMuscle:MS003701	0.937295			Low:High:High:CD4_p_helperT:MS000901	0.980693			Low:High:High:Inf_OAT017	0.877824
Low:High:High:SkeltalMuscle:MS001901	0.9			Low:High:High:CD4_p_helperT:MS001101	0.993421			Low:High:High:Inf_OAT020	0.875866
Low:High:High:SkeltalMuscle:MS001701	0.904054			Low:High:High:CD4_p_helperT:MS017605	0.950741			Low:High:High:Inf_OAT021	0.917494
Low:High:High:SkeltalMuscle:MS001201	0.977651			Low:High:High:CD4_p_helperT:MS000801	0.983871			Low:High:High:Inf_OAT015	0.929661
Low:High:High:SkeltalMuscle:MS003601	0.935484			Low:High:High:CD4_p_helperT:MS003001	0.972222			Low:High:High:Inf_NC008	0.921561
Low:High:High:SkeltalMuscle:MS003901	0.90699			Low:High:High:CD4_p_helperT:MS032001	0.981			Low:High:High:Inf_NC005	0.911613
Low:High:High:SkeltalMuscle:MS003301	1			Low:High:High:CD4_p_helperT:MS002701	0.975833			Low:High:High:Inf_NC007	0.868838
Low:High:High:SkeltalMuscle:MS004901	0.976047			Low:High:High:CD4_p_helperT:MS001001	1			Low:High:High:Inf_OAT018	0.959023
Low:High:High:SkeltalMuscle:MS004501	0.966667			Low:High:High:CD4_p_helperT:MS002801	0.992917			Low:High:High:Inf_OAT019	0.786249
Low:High:High:SkeltalMuscle:MS004501	0.928571			Low:High:High:CD4_p_helperT:MS002901	0.992188			Low:High:High:Inf_OAT017	0.822317
Low:High:High:SkeltalMuscle:MS004901	0.945315			Low:High:High:CD4_p_helperT:MS000701	0.972247			Low:High:High:Inf_NC004	0.743671
Low:High:High:SkeltalMuscle:MS003301	0.833333			Low:High:High:CD4_p_helperT:MS000501	0.982353			Low:High:High:Inf_NC002	0.827966
Low:High:High:SkeltalMuscle:MS003901	0.913086			Low:High:High:CD4_p_helperT:MS002601	0.904412			Low:High:High:Inf_OAT021	0.77418
Low:High:High:SkeltalMuscle:MS001701	0.921667			Low:High:High:CD4_p_helperT:MS000401	0.973478			Low:High:High:Inf_OAT020	0.784127
Low:High:High:SkeltalMuscle:MS001201	0.942857			Low:High:High:CD4_p_helperT:MS000601	0.958529			Low:High:High:Inf_NC008	0.854967
Low:High:High:SkeltalMuscle:MS003601	0.954545			Low:High:High:CD4_p_helperT:MS002501	0.967			Low:High:High:Inf_OAT015	0.841418
Low:High:High:SkeltalMuscle:MS001901	1			Low:High:High:CD4_p_helperT:MS007903	0.941176			Low:High:High:Inf_NC007	0.736163
Low:High:High:SkeltalMuscle:MS003701	0.950082			Low:High:High:CD4_p_helperT:MS002401	0.942857			Low:High:High:Inf_NC005	0.762473
Low:High:High:SkeltalMuscle:MS001801	1			Low:High:High:CD4_p_helperT:MS002901	1			Low:High:High:Inf_OAT018	0.781947
Low:High:High:SkeltalMuscle:MS001501	0.961848			Low:High:High:CD4_p_helperT:MS002801	1			Low:High:High:Inf_OAT019	0.784437
Low:High:High:SkeltalMuscle:MS005001	0.936818			Low:High:High:CD4_p_helperT:MS000701	0.970685			Low:High:High:Inf_OAT018	0.855221
Low:High:High:SkeltalMuscle:MS001301	0.942371			Low:High:High:CD4_p_helperT:MS000801	0.947087			Low:High:High:Inf_NC005	0.864235
Low:High:High:SkeltalMuscle:MS004701	0.934531			Low:High:High:CD4_p_helperT:MS017605	0.941667			Low:High:High:Inf_NC007	0.983333
Low:High:High:SkeltalMuscle:MS005101	0.93125			Low:High:High:CD4_p_helperT:MS000901	0.997167			Low:High:High:Inf_OAT019	0.841739
Low:High:High:SkeltalMuscle:MS003601	0.919024			Low:High:High:CD4_p_helperT:MS001101	0.968			Low:High:High:Inf_NC004	0.75439
Low:High:High:SkeltalMuscle:MS001701	0.93			Low:High:High:CD4_p_helperT:MS002701	0.966667			Low:High:High:Inf_OAT017	0.919986
Low:High:High:SkeltalMuscle:MS001201	0.938103			Low:High:High:CD4_p_helperT:MS032001	0.943443			Low:High:High:Inf_NC002	0.901575
Low:High:High:SkeltalMuscle:MS003901	0.971538			Low:High:High:CD4_p_helperT:MS001001	0.976435			Low:High:High:Inf_OAT015	0.855329
Low:High:High:SkeltalMuscle:MS004501	0.936579			Low:High:High:CD4_p_helperT:MS003001	0.980769			Low:High:High:Inf_NC008	0.935298
Low:High:High:SkeltalMuscle:MS003301	0.96			Low:High:High:CD4_p_helperT:MS002501	0.9532			Low:High:High:Inf_OAT020	0.936447
Low:High:High:SkeltalMuscle:MS004901	0.920714			Low:High:High:CD4_p_helperT:MS000601	0.960303			Low:High:High:Inf_OAT021	0.872905
Low:High:High:SkeltalMuscle:MS004701	0.876667			Low:High:High:CD4_p_helperT:MS007903	0.987805			Low:High:High:Inf_NC002	0.894683
Low:High:High:SkeltalMuscle:MS001301	0.917215			Low:High:High:CD4_p_helperT:MS002401	0.987838			Low:High:High:Inf_OAT017	0.860537
Low:High:High:SkeltalMuscle:MS005001	0.956562			Low:High:High:CD4_p_helperT:MS002601	0.993125			Low:High:High:Inf_NC004	0.763115
Low:High:High:SkeltalMuscle:MS005101	0.921316			Low:High:High:CD4_p_helperT:MS000501	0.965714			Low:High:High:Inf_OAT015	0.862516
Low:High:High:SkeltalMuscle:MS003701	0.936812			Low:High:High:CD4_p_helperT:MS000401	0.997297			Low:High:High:Inf_NC008	0.869759
Low:High:High:SkeltalMuscle:MS001901	0.940423			Low:High:High:CD4_p_helperT:MS002901	1			Low:High:High:Inf_OAT020	0.901262
Low:High:High:SkeltalMuscle:MS001501	0.954348			Low:High:High:CD4_p_helperT:MS002801	0.96875			Low:High:High:Inf_OAT021	0.860319
Low:High:High:SkeltalMuscle:MS001801	0.93569			Low:High:High:CD4_p_helperT:MS000701	0.979592			Low:High:High:Inf_OAT018	0.888839
Low:High:High:SkeltalMuscle:MS003901	0.933578			Low:High:High:CD4_p_helperT:MS017605	0.96675			Low:High:High:Inf_NC005	0.856253
Low:High:High:SkeltalMuscle:MS001701	0.939244			Low:High:High:CD4_p_helperT:MS000801	0.95975			Low:High:High:Inf_NC007	0.807875
Low:High:High:SkeltalMuscle:MS001201	0.955644			Low:High:High:CD4_p_helperT:MS001101	1			Low:High:High:Inf_OAT019	0.799888
Low:High:High:SkeltalMuscle:MS003601	0.85			Low:High:High:CD4_p_helperT:MS000901	0.985106			Low:High:High:Inf_OAT019	0.829078
Low:High:High:SkeltalMuscle:MS004501	0.992857			Low:High:High:CD4_p_helperT:MS001001	0.957			Low:High:High:Inf_OAT018	0.910926
Low:High:High:SkeltalMuscle:MS004901	0.943936			Low:High:High:CD4_p_helperT:MS002701	1			Low:High:High:Inf_NC007	0.902778
Low:High:High:SkeltalMuscle:MS003301	0.921818			Low:High:High:CD4_p_helperT:MS032001	0.925818			Low:High:High:Inf_NC005	0.926975
Low:High:High:SkeltalMuscle:MS005001	0.966429			Low:High:High:CD4_p_helperT:MS003001	0.990833			Low:High:High:Inf_OAT015	0.923931
Low:High:High:SkeltalMuscle:MS001301	0.927449			Low:High:High:CD4_p_helperT:MS002501	0.983333			Low:High:High:Inf_NC008	0.904573
Low:High:High:SkeltalMuscle:MS004701	0.962836			Low:High:High:CD4_p_helperT:MS000601	0.992571			Low:High:High:Inf_OAT020	0.911424
Low:High:High:SkeltalMuscle:MS005101	0.985577			Low:High:High:CD4_p_helperT:MS002401	0.990909			Low:High:High:Inf_OAT021	0.856334
Low:High:High:SkeltalMuscle:MS001901	0.939655			Low:High:High:CD4_p_helperT:MS007903	0.97			Low:High:High:Inf_NC002	0.919561
Low:High:High:SkeltalMuscle:MS003701	0.97			Low:High:High:CD4_p_helperT:MS002601	0.968333			Low:High:High:Inf_NC004	0.88714
Low:High:High:SkeltalMuscle:MS001501	0.927609			Low:High:High:CD4_p_helperT:MS000501	0.918837			Low:High:High:Inf_OAT017	0.84308
Low:High:High:SkeltalMuscle:MS001801	0.914308			Low:High:High:CD4_p_helperT:MS000401	0.915135			Low:High:High:Inf_NC004	0.739863
Low:High:High:SkeltalMuscle:MS003901	0.981389			Low:High:High:CD4_p_helperT:MS002601	0.934444			Low:High:High:Inf_NC002	0.893859
Low:High:High:SkeltalMuscle:MS001701	0.989437			Low:High:High:CD4_p_helperT:MS000501	0.93814			Low:High:High:Inf_OAT017	0.914571
Low:High:High:SkeltalMuscle:MS001201	0.954057			Low:High:High:CD4_p_helperT:MS000401	0.843704			Low:High:High:Inf_NC008	0.864442
Low:High:High:SkeltalMuscle:MS003601	0.952381			Low:High:High:CD4_p_helperT:MS002501	0.97987			Low:High:High:Inf_OAT015	0.780474
Low:High:High:SkeltalMuscle:MS003301	0.966667			Low:High:High:CD4_p_helperT:MS000601	0.932239			Low:High:High:Inf_OAT021	0.879673
Low:High:High:SkeltalMuscle:MS004901	0.909123			Low:High:High:CD4_p_helperT:MS007903	1			Low:High:High:Inf_OAT020	0.92092
Low:High:High:SkeltalMuscle:MS004501	0.884			Low:High:High:CD4_p_helperT:MS002401	0.994462			Low:High:High:Inf_OAT018	0.896928
Low:High:High:SkeltalMuscle:MS005101	0.885625			Low:High:High:CD4_p_helperT:MS000801	0.954938			Low:High:High:Inf_NC005	0.909022
Low:High:High:SkeltalMuscle:MS001301	0.956286			Low:High:High:CD4_p_helperT:MS017605	0.936316			Low:High:High:Inf_NC007	0.902083
Low:High:High:SkeltalMuscle:MS005001	0.898696			Low:High:High:CD4_p_helperT:MS001101	0.958033			Low:High:High:Inf_OAT019	0.751737
Low:High:High:SkeltalMuscle:MS004701	0.981132			Low:High:High:CD4_p_helperT:MS000901	0.937297			Low:High:High:Inf_OAT018	0.933963
Low:High:High:SkeltalMuscle:MS001501	0.958478			Low:High:High:CD4_p_helperT:MS001001	0.946582			Low:High:High:Inf_NC007	0.845614
Low:High:High:SkeltalMuscle:MS001801	1			Low:High:High:CD4_p_helperT:MS002701	0.964507			Low:High:High:Inf_NC005	0.895434
Low:High:High:SkeltalMuscle:MS001901	0.946452			Low:High:High:CD4_p_helperT:MS032001	0.931154			Low:High:High:Inf_OAT019	0.815785
Low:High:High:SkeltalMuscle:MS003701	0.990725			Low:High:High:CD4_p_helperT:MS003001	0.9			Low:High:High:Inf_NC004	0.832697
Low:High:High:SkeltalMuscle:MS003701	0.968687			Low:High:High:CD4_p_helperT:MS002901	0.944231			Low:High:High:Inf_NC002	0.868119
Low:High:High:SkeltalMuscle:MS001901	0.946923			Low:High:High:CD4_p_helperT:MS002801	0.975			Low:High:High:Inf_OAT017	0.863449
Low:High:High:SkeltalMuscle:MS001501	0.975341			Low:High:High:CD4_p_helperT:MS000701	0.942388			Low:High:High:Inf_NC008	0.860499
Low:High:High:SkeltalMuscle:MS001801	1			Low:High:High:CD4_p_helperT:MS007903	0.764167			Low:High:High:Inf_OAT015	0.867293
Low:High:High:SkeltalMuscle:MS004701	0.890323			Low:High:High:CD4_p_helperT:MS002401	0.892712			Low:High:High:Inf_OAT021	0.863548
Low:High:High:SkeltalMuscle:MS005001	0.962714			Low:High:High:CD4_p_helperT:MS002501	0.946038			Low:High:High:Inf_OAT020	0.903379
Low:High:High:SkeltalMuscle:MS001301	0.913445			Low:High:High:CD4_p_helperT:MS000601	0.938837			Low:High:High:Inf_OAT019	0.790677
Low:High:High:SkeltalMuscle:MS005101	0.97561			Low:High:High:CD4_p_helperT:MS000401	0.819444			Low:High:High:Inf_NC005	0.781237
Low:High:High:SkeltalMuscle:MS004501	0.978261			Low:High:High:CD4_p_helperT:MS002601	0.952703			Low:High:High:Inf_NC007	0.937037
Low:High:High:SkeltalMuscle:MS004901	0.93604			Low:High:High:CD4_p_helperT:MS000501	0.917692			Low:High:High:Inf_OAT018	0.903878
Low:High:High:SkeltalMuscle:MS003301	0.984375			Low:High:High:CD4_p_helperT:MS000701	0.892642			Low:High:High:Inf_OAT021	0.842344
Low:High:High:SkeltalMuscle:MS003601	0.888889			Low:High:High:CD4_p_helperT:MS002901	0.962759			Low:High:High:Inf_OAT020	0.870186
Low:High:High:SkeltalMuscle:MS001701	0.946604			Low:High:High:CD4_p_helperT:MS002801	0.95775			Low:High:High:Inf_NC008	0.862313
Low:High:High:SkeltalMuscle:MS001201	0.953333			Low:High:High:CD4_p_helperT:MS001001	0.956774			Low:High:High:Inf_OAT015	0.861656
Low:High:High:SkeltalMuscle:MS003901	0.919863			Low:High:High:CD4_p_helperT:MS002701	0.983061			Low:High:High:Inf_NC002	0.869317
Low:Low:Low:SkeltalMuscle:MS004501	0.9			Low:High:High:CD4_p_helperT:MS032001	0.921562			Low:High:High:Inf_NC004	0.721062
Low:Low:Low:SkeltalMuscle:MS004901	0.925439			Low:High:High:CD4_p_helperT:MS003001	0.903023			Low:High:High:Inf_OAT017	0.888511
Low:Low:Low:SkeltalMuscle:MS003301	0.913043			Low:High:High:CD4_p_helperT:MS000801	0.903148			Low:High:High:Inf_NC005	0.820821
Low:Low:Low:SkeltalMuscle:MS003901	0.921373			Low:High:High:CD4_p_helperT:MS017605	0.842432			Low:High:High:Inf_NC007	0.814821
Low:Low:Low:SkeltalMuscle:MS003601	0.945946			Low:High:High:CD4_p_helperT:MS001101	0.95			Low:High:High:Inf_OAT018	0.859521
Low:Low:Low:SkeltalMuscle:MS001701	0.9512			Low:High:High:CD4_p_helperT:MS000901	0.911731			Low:High:High:Inf_OAT019	0.6531
Low:Low:Low:SkeltalMuscle:MS001201	0.92438			Low:High:High:CD4_p_helperT:MS000801	0.9468			Low:High:High:Inf_NC004	0.74606
Low:Low:Low:SkeltalMuscle:MS001901	0.9334			Low:High:High:CD4_p_helperT:MS017605	0.95			Low:High:High:Inf_NC002	0.835835
Low:Low:Low:SkeltalMuscle:MS003701	0.918288			Low:High:High:CD4_p_helperT:MS000901	0.96087			Low:High:High:Inf_OAT017	0.87015
Low:Low:Low:SkeltalMuscle:MS001801	0.854107			Low:High:High:CD4_p_helperT:MS001101	0.984444			Low:High:High:Inf_OAT021	0.80728
Low:Low:Low:SkeltalMuscle:MS001501	0.952381			Low:High:High:CD4_p_helperT:MS002701	0.997069			Low:High:High:Inf_OAT020	0.86906
Low:Low:Low:SkeltalMuscle:MS005001	0.950341			Low:High:High:CD4_p_helperT:MS032001	0.939868			Low:High:High:Inf_NC008	0.903107
Low:Low:Low:SkeltalMuscle:MS001301	0.879843			Low:High:High:CD4_p_helperT:MS001001	0.961875			Low:High:High:Inf_OAT015	0.825414
Low:Low:Low:SkeltalMuscle:MS004701	1			Low:High:High:CD4_p_helperT:MS003001	1			Low:High:High:Inf_OAT019	0.774348
Low:Low:Low:SkeltalMuscle:MS005101	0.958333			Low:High:High:CD4_p_helperT:MS002901	0.893			Low:High:High:Inf_NC005	0.87829
Low:Low:Low:SkeltalMuscle:MS003301	0.933333			Low:High:High:CD4_p_helperT:MS002801	0.875			Low:High:High:Inf_NC007	0.934091
Low:Low:Low:SkeltalMuscle:MS004901	0.940735			Low:High:High:CD4_p_helperT:MS000701	0.969091			Low:High:High:Inf_OAT018	0.871083
Low:Low:Low:SkeltalMuscle:MS004501	0.966667			Low:High:High:CD4_p_helperT:MS002601	1			Low:High:High:Inf_OAT021	0.926488
Low:Low:Low:SkeltalMuscle:MS001701	0.9075			Low:High:High:CD4_p_helperT:MS000501	0.990741			Low:High:High:Inf_OAT020	0.905607
Low:Low:Low:SkeltalMuscle:MS001201	0.931842			Low:High:High:CD4_p_helperT:MS000401	0.995526			Low:High:High:Inf_NC008	0.925294
Low:Low:Low:SkeltalMuscle:MS003601	0.938684			Low:High:High:CD4_p_helperT:MS002501	0.974074			Low:High:High:Inf_OAT015	0.90513
Low:Low:Low:SkeltalMuscle:MS003901	0.892083			Low:High:High:CD4_p_helperT:MS000601	0.991818			Low:High:High:Inf_NC004	0.909604
Low:Low:Low:SkeltalMuscle:MS001801	0.929615			Low:High:High:CD4_p_helperT:MS007903	1			Low:High:High:Inf_NC002	0.876149
Low:Low:Low:SkeltalMuscle:MS001501	0.904151			Low:High:High:CD4_p_helperT:MS002401	0.981333			Low:High:High:Inf_OAT017	0.846566
Low:Low:Low:SkeltalMuscle:MS003701	0.92975			Low:High:High:CD4_p_helperT:MS000401	0.88625			Low:High:High:Inf_OAT019	0.800569
Low:Low:Low:SkeltalMuscle:MS001901	0.926032			Low:High:High:CD4_p_helperT:MS000501	0.990909			Low:High:High:Inf_NC007	0.954762
Low:Low:Low:SkeltalMuscle:MS005101	0.923077			Low:High:High:CD4_p_helperT:MS002601	0.964286			Low:High:High:Inf_NC005	0.849816
Low:Low:Low:SkeltalMuscle:MS004701	0.938478			Low:High:High:CD4_p_helperT:MS002401	0.96			Low:High:High:Inf_OAT018	0.898127
Low:Low:Low:SkeltalMuscle:MS001301	0.898427			Low:High:High:CD4_p_helperT:MS007903	0.991071			Low:High:High:Inf_OAT020	0.79575
Low:Low:Low:SkeltalMuscle:MS005001	0.936322			Low:High:High:CD4_p_helperT:MS000601	0.982586			Low:High:High:Inf_OAT021	0.829829
Low:Low:Low:SkeltalMuscle:MS001501	0.91913			Low:High:High:CD4_p_helperT:MS002501	0.95973			Low:High:High:Inf_OAT015	0.80358
Low:Low:Low:SkeltalMuscle:MS001801	0.961905			Low:High:High:CD4_p_helperT:MS003001	0.966538			Low:High:High:Inf_NC008	0.73529
Low:Low:Low:SkeltalMuscle:MS003701	0.942941			Low:High:High:CD4_p_helperT:MS001001	0.977593			Low:High:High:Inf_NC002	0.825328
Low:Low:Low:SkeltalMuscle:MS001901	0.951613			Low:High:High:CD4_p_helperT:MS032001	0.976			Low:High:High:Inf_NC004	0.784365
Low:Low:Low:SkeltalMuscle:MS005101	0.960784			Low:High:High:CD4_p_helperT:MS002701	0.935769			Low:High:High:Inf_OAT017	0.903323
Low:Low:Low:SkeltalMuscle:MS004701	0.900263			Low:High:High:CD4_p_helperT:MS001101	0.918333			Low:High:High:Inf_OAT019	0.35951
Low:Low:Low:SkeltalMuscle:MS005001	0.905859			Low:High:High:CD4_p_helperT:MS000901	0.959355			Low:High:High:Inf_NC005	0.924553
Low:Low:Low:SkeltalMuscle:MS001301	0.928883			Low:High:High:CD4_p_helperT:MS000801	0.973333			Low:High:High:Inf_NC007	0.850635
Low:Low:Low:SkeltalMuscle:MS004901	0.9176			Low:High:High:CD4_p_helperT:MS017605	0.953125			Low:High:High:Inf_OAT018	0.861989
Low:Low:Low:SkeltalMuscle:MS003301	0.956522			Low:High:High:CD4_p_helperT:MS000701	0.957442			Low:High:High:Inf_OAT021	0.790267
Low:Low:Low:SkeltalMuscle:MS004501	0.916667			Low:High:High:CD4_p_helperT:MS002801	0.970882			Low:High:High:Inf_OAT020	0.931655
Low:Low:Low:SkeltalMuscle:MS001201	0.943475			Low:High:High:CD4_p_helperT:MS002901	0.955833			Low:High:High:Inf_NC008	0.861434
Low:Low:Low:SkeltalMuscle:MS001701	0.928684			Low:High:High:CD4_p_helperT:MS002701	1			Low:High:High:Inf_OAT015	0.902043
Low:Low:Low:SkeltalMuscle:MS003601	0.939189			Low:High:High:CD4_p_helperT:MS032001	0.929			Low:High:High:Inf_OAT017	0.828467
Low:Low:Low:SkeltalMuscle:MS003901	0.902027			Low:High:High:CD4_p_helperT:MS001001	0.95			Low:High:High:Inf_NC002	0.906417
Low:Low:Low:SkeltalMuscle:MS005101	0.903793			Low:High:High:CD4_p_helperT:MS003001	0.9375			Low:High:High:Inf_NC004	0.588339
Low:Low:Low:SkeltalMuscle:MS004701	0.946471			Low:High:High:CD4_p_helperT:MS000801	0.956774			Low:High:High:Inf_OAT018	0.824072
Low:Low:Low:SkeltalMuscle:MS005001	0.933223			Low:High:High:CD4_p_helperT:MS017605	0.954545			Low:High:High:Inf_NC007	0.832703
Low:Low:Low:SkeltalMuscle:MS001301	0.933496			Low:High:High:CD4_p_helperT:MS000901	0.967183			Low:High:High:Inf_NC005	0.819769
Low:Low:Low:SkeltalMuscle:MS001801	0.949872			Low:High:High:CD4_p_helperT:MS001101	0.985313			Low:High:High:Inf_OAT019	0.812978
Low:Low:Low:SkeltalMuscle:MS001501	0.947075			Low:High:High:CD4_p_helperT:MS000701	1			Low:High:High:Inf_NC004	0.761455
Low:Low:Low:SkeltalMuscle:MS003701	0.957757			Low:High:High:CD4_p_helperT:MS002901	0.875			Low:High:High:Inf_NC002	0.839671
Low:Low:Low:SkeltalMuscle:MS001901	0.924074			Low:High:High:CD4_p_helperT:MS002801	1			Low:High:High:Inf_OAT017	0.875627
Low:Low:Low:SkeltalMuscle:MS001701	0.898511			Low:High:High:CD4_p_helperT:MS000401	0.946809			Low:High:High:Inf_NC008	0.873103
Low:Low:Low:SkeltalMuscle:MS001201	0.965652			Low:High:High:CD4_p_helperT:MS002601	0.988919			Low:High:High:Inf_OAT015	0.814104
Low:Low:Low:SkeltalMuscle:MS003601	0.919815			Low:High:High:CD4_p_helperT:MS000501	0.994138			Low:High:High:Inf_OAT021	0.827321
Low:Low:Low:SkeltalMuscle:MS003901	0.909554			Low:High:High:CD4_p_helperT:MS002401	0.95			Low:High:High:Inf_OAT020	0.827994
Low:Low:Low:SkeltalMuscle:MS004901	0.904087			Low:High:High:CD4_p_helperT:MS007903	0.979167			Low:High:High:Inf_NC008	0.932672
Low:Low:Low:SkeltalMuscle:MS003301	0.8			Low:High:High:CD4_p_helperT:MS002501	0.9868			Low:High:High:Inf_OAT015	0.857234
Low:Low:Low:SkeltalMuscle:MS004501	0.947917			Low:High:High:CD4_p_helperT:MS000601	1			Low:High:High:Inf_OAT021	0.837166
Low:Low:Low:SkeltalMuscle:MS003901	0.931183			Low:High:High:CD4_p_helperT:MS000601	0.955882			Low:High:High:Inf_OAT020	0.894157
Low:Low:Low:SkeltalMuscle:MS001201	0.929187			Low:High:High:CD4_p_helperT:MS002501	0.998			Low:High:High:Inf_NC002	0.891384
Low:Low:Low:SkeltalMuscle:MS001701	0.861915			Low:High:High:CD4_p_helperT:MS007903	1			Low:High:High:Inf_NC004	0.590696
Low:Low:Low:SkeltalMuscle:MS003601	0.81			Low:High:High:CD4_p_helperT:MS002401	1			Low:High:High:Inf_OAT017	0.870146
Low:Low:Low:SkeltalMuscle:MS004901	0.913563			Low:High:High:CD4_p_helperT:MS000501	0.976275			Low:High:High:Inf_OAT019	0.621841
Low:Low:Low:SkeltalMuscle:MS003301	0.911765			Low:High:High:CD4_p_helperT:MS002601	0.987805			Low:High:High:Inf_OAT018	0.888948
Low:Low:Low:SkeltalMuscle:MS004501	0.75			Low:High:High:CD4_p_helperT:MS000401	1			Low:High:High:Inf_NC007	0.907576
Low:Low:Low:SkeltalMuscle:MS005101	0.9			Low:High:High:CD4_p_helperT:MS002801	0.991935			Low:High:High:Inf_NC005	0.841089
Low:Low:Low:SkeltalMuscle:MS005001	0.866806			Low:High:High:CD4_p_helperT:MS002901	0.988806			Low:High:High:Inf_OAT015	0.853209
Low:Low:Low:SkeltalMuscle:MS001301	0.903966			Low:High:High:CD4_p_helperT:MS000701	0.993243			Low:High:High:Inf_NC008	0.83044
Low:Low:Low:SkeltalMuscle:MS004701	0.637059			Low:High:High:CD4_p_helperT:MS001101	0.960476			Low:High:High:Inf_OAT020	0.870996
Low:Low:Low:SkeltalMuscle:MS001801	0.769231			Low:High:High:CD4_p_helperT:MS000901	0.991549			Low:High:High:Inf_OAT021	0.83578
Low:Low:Low:SkeltalMuscle:MS001501	0.949895			Low:High:High:CD4_p_helperT:MS017605	1			Low:High:High:Inf_NC002	0.815777
Low:Low:Low:SkeltalMuscle:MS001901	0.882558			Low:High:High:CD4_p_helperT:MS000801	0.961029			Low:High:High:Inf_NC004	0.871818
Low:Low:Low:SkeltalMuscle:MS003701	0.9105			Low:High:High:CD4_p_helperT:MS003001	0.982143			Low:High:High:Inf_OAT017	0.874091
Low:Low:Low:SkeltalMuscle:MS005101	0.890625			Low:High:High:CD4_p_helperT:MS001001	0.98878			Low:High:High:Inf_OAT019	0.835737
Low:Low:Low:SkeltalMuscle:MS004701	0.914878			Low:High:High:CD4_p_helperT:MS032001	0.967037			Low:High:High:Inf_OAT018	0.815064
Low:Low:Low:SkeltalMuscle:MS001301	0.909429			Low:High:High:CD4_p_helperT:MS002701	0.962857			Low:High:High:Inf_NC007	0.945833
Low:Low:Low:SkeltalMuscle:MS005001	0.906176			Low:High:High:CD4_p_helperT:MS000501	0.964286			Low:High:High:Inf_NC005	0.866309
Low:Low:Low:SkeltalMuscle:MS001501	0.971429			Low:High:High:CD4_p_helperT:MS002601	0.943333			Low:High:High:Inf_OAT017	0.8425
Low:Low:Low:SkeltalMuscle:MS001801	0.981132			Low:High:High:CD4_p_helperT:MS000401	0.925			Low:High:High:Inf_NC004	0.772841
Low:Low:Low:SkeltalMuscle:MS003701	0.91			Low:High:High:CD4_p_helperT:MS000601	0.985			Low:High:High:Inf_NC002	0.845463
Low:Low:Low:SkeltalMuscle:MS001901	0.935152			Low:High:High:CD4_p_helperT:MS002501	0.988462			Low:High:High:Inf_OAT020	0.825066
Low:Low:Low:SkeltalMuscle:MS001701	0.923793			Low:High:High:CD4_p_helperT:MS002401	0.966667			Low:High:High:Inf_OAT021	0.723331
Low:Low:Low:SkeltalMuscle:MS003601	0.90625			Low:High:High:CD4_p_helperT:MS007903	1			Low:High:High:Inf_OAT015	0.907872
Low:Low:Low:SkeltalMuscle:MS001201	0.944909			Low:High:High:CD4_p_helperT:MS000901	0.983			Low:High:High:Inf_NC008	0.883883
Low:Low:Low:SkeltalMuscle:MS003901	0.889322			Low:High:High:CD4_p_helperT:MS001101	0.965091			Low:High:High:Inf_NC007	0.925833
Low:Low:Low:SkeltalMuscle:MS003301	0.852692			Low:High:High:CD4_p_helperT:MS017605	0.947368			Low:High:High:Inf_NC005	0.841269
Low:Low:Low:SkeltalMuscle:MS004901	0.870694			Low:High:High:CD4_p_helperT:MS000801	0.926757			Low:High:High:Inf_OAT018	0.912287
Low:Low:Low:SkeltalMuscle:MS004501	0.921351			Low:High:High:CD4_p_helperT:MS003001	0.963056			Low:High:High:Inf_OAT019	0.679113
Low:Low:Low:SkeltalMuscle:MS001501	0.960625			Low:High:High:CD4_p_helperT:MS032001	0.938947			Low:High:High:Inf_OAT018	0.882762
Low:Low:Low:SkeltalMuscle:MS001801	0.896867			Low:High:High:CD4_p_helperT:MS002701	0.971429			Low:High:High:Inf_NC007	0.816484
Low:Low:Low:SkeltalMuscle:MS001901	0.992273			Low:High:High:CD4_p_helperT:MS001001	0.98			Low:High:High:Inf_NC005	0.896675
Low:Low:Low:SkeltalMuscle:MS003701	0.956769			Low:High:High:CD4_p_helperT:MS002801	0.97875			Low:High:High:Inf_OAT019	0.811818
Low:Low:Low:SkeltalMuscle:MS005101	0.978			Low:High:High:CD4_p_helperT:MS002901	0.916364			Low:High:High:Inf_NC002	0.881079
Low:Low:Low:SkeltalMuscle:MS001301	0.952409			Low:High:High:CD4_p_helperT:MS000701	0.983636			Low:High:High:Inf_NC004	0.847571
Low:Low:Low:SkeltalMuscle:MS005001	0.913619			Low:Low:Low:CD4_p_helperT:MS000501	0.903043			Low:High:High:Inf_OAT017	0.885293
Low:Low:Low:SkeltalMuscle:MS004701	0.921389			Low:Low:Low:CD4_p_helperT:MS002601	0.962034			Low:High:High:Inf_NC008	0.847084
Low:Low:Low:SkeltalMuscle:MS003301	0.923913			Low:Low:Low:CD4_p_helperT:MS000401	0.888243			Low:High:High:Inf_OAT015	0.891796
Low:Low:Low:SkeltalMuscle:MS004901	0.935333			Low:Low:Low:CD4_p_helperT:MS000601	0.948261			Low:High:High:Inf_OAT021	0.856614
Low:Low:Low:SkeltalMuscle:MS004501	0.963235			Low:Low:Low:CD4_p_helperT:MS002501	0.950588			Low:High:High:Inf_OAT020	0.921111
Low:Low:Low:SkeltalMuscle:MS003901	0.968189			Low:Low:Low:CD4_p_helperT:MS002401	0.939024			Low:High:High:Inf_OAT019	0.709138
Low:Low:Low:SkeltalMuscle:MS001201	0.974634			Low:Low:Low:CD4_p_helperT:MS007903	0.950741			Low:High:High:Inf_OAT018	0.878504
Low:Low:Low:SkeltalMuscle:MS001701	0.95975			Low:Low:Low:CD4_p_helperT:MS000901	0.942526			Low:High:High:Inf_NC007	0.923313
Low:Low:Low:SkeltalMuscle:MS003601	0.973684			Low:Low:Low:CD4_p_helperT:MS001101	0.958214			Low:High:High:Inf_NC005	0.943899
Low:Low:Low:SkeltalMuscle:MS005101	1			Low:Low:Low:CD4_p_helperT:MS017605	0.89881			Low:High:High:Inf_OAT015	0.934832
Low:Low:Low:SkeltalMuscle:MS004701	0.960217			Low:Low:Low:CD4_p_helperT:MS000801	0.947532			Low:High:High:Inf_NC008	0.918752
Low:Low:Low:SkeltalMuscle:MS001301	0.890196			Low:Low:Low:CD4_p_helperT:MS003001	0.8975			Low:High:High:Inf_OAT020	0.928897
Low:Low:Low:SkeltalMuscle:MS005001	0.845634			Low:Low:Low:CD4_p_helperT:MS002701	0.965932			Low:High:High:Inf_OAT021	0.88656
Low:Low:Low:SkeltalMuscle:MS001801	0.901935			Low:Low:Low:CD4_p_helperT:MS032001	0.912614			Low:High:High:Inf_OAT017	0.869876
Low:Low:Low:SkeltalMuscle:MS001501	0.854035			Low:Low:Low:CD4_p_helperT:MS001001	0.950753			Low:High:High:Inf_NC004	0.801609
Low:Low:Low:SkeltalMuscle:MS003701	0.865567			Low:Low:Low:CD4_p_helperT:MS002801	0.94907			Low:High:High:Inf_NC002	0.921905
Low:Low:Low:SkeltalMuscle:MS001901	0.873455			Low:Low:Low:CD4_p_helperT:MS002901	0.879155			Low:High:High:Inf_NC004	0.499438
Low:Low:Low:SkeltalMuscle:MS001701	0.897024			Low:Low:Low:CD4_p_helperT:MS000701	0.919149			Low:High:High:Inf_OAT017	0.675843
Low:Low:Low:SkeltalMuscle:MS001201	0.892462			Low:Low:Low:CD4_p_helperT:MS000601	0.975			Low:High:High:Inf_NC002	0.908377
Low:Low:Low:SkeltalMuscle:MS003601	0.844194			Low:Low:Low:CD4_p_helperT:MS002501	0.932432			Low:High:High:Inf_OAT020	0.759931
Low:Low:Low:SkeltalMuscle:MS003901	0.900566			Low:Low:Low:CD4_p_helperT:MS002401	0.971165			Low:High:High:Inf_OAT021	0.734788
Low:Low:Low:SkeltalMuscle:MS003301	1			Low:Low:Low:CD4_p_helperT:MS007903	0.964286			Low:High:High:Inf_OAT015	0.818501
Low:Low:Low:SkeltalMuscle:MS004901	0.868614			Low:Low:Low:CD4_p_helperT:MS000501	0.926452			Low:High:High:Inf_NC008	0.801634
Low:Low:Low:SkeltalMuscle:MS004501	0.963056			Low:Low:Low:CD4_p_helperT:MS002601	0.971493			Low:High:High:Inf_NC005	0.847481
Low:Low:Low:SkeltalMuscle:MS004901	0.908462			Low:Low:Low:CD4_p_helperT:MS000401	0.962833			Low:High:High:Inf_NC007	0.877211
Low:Low:Low:SkeltalMuscle:MS003301	0.9375			Low:Low:Low:CD4_p_helperT:MS002801	0.988235			Low:High:High:Inf_OAT018	0.800697
Low:Low:Low:SkeltalMuscle:MS004501	0.942308			Low:Low:Low:CD4_p_helperT:MS002901	0.980725			Low:High:High:Inf_OAT019	0.403825
Low:Low:Low:SkeltalMuscle:MS003901	0.924638			Low:Low:Low:CD4_p_helperT:MS000701	0.996			Low:Low:Low:Inf_NC004	0.0199889
Low:Low:Low:SkeltalMuscle:MS001201	0.8365			Low:Low:Low:CD4_p_helperT:MS001101	0.989535			Low:Low:Low:Inf_OAT017	0.221061
Low:Low:Low:SkeltalMuscle:MS001701	0.827021			Low:Low:Low:CD4_p_helperT:MS000901	0.97561			Low:Low:Low:Inf_NC002	0.0506584
Low:Low:Low:SkeltalMuscle:MS003601	0.862105			Low:Low:Low:CD4_p_helperT:MS017605	0.942727			Low:Low:Low:Inf_OAT021	0.0348356
Low:Low:Low:SkeltalMuscle:MS001501	0.891194			Low:Low:Low:CD4_p_helperT:MS000801	0.976329			Low:Low:Low:Inf_OAT020	0.0422939
Low:Low:Low:SkeltalMuscle:MS001801	0.889216			Low:Low:Low:CD4_p_helperT:MS003001	0.961064			Low:Low:Low:Inf_NC008	0.0521073
Low:Low:Low:SkeltalMuscle:MS001901	0.831316			Low:Low:Low:CD4_p_helperT:MS001001	0.983276			Low:Low:Low:Inf_OAT015	0.0880157
Low:Low:Low:SkeltalMuscle:MS003701	0.907846			Low:Low:Low:CD4_p_helperT:MS002701	0.963483			Low:Low:Low:Inf_NC005	0.132094
Low:Low:Low:SkeltalMuscle:MS005101	0.956522			Low:Low:Low:CD4_p_helperT:MS032001	0.949588			Low:Low:Low:Inf_NC007	0.0545455
Low:Low:Low:SkeltalMuscle:MS005001	0.891795			Low:Low:Low:CD4_p_helperT:MS001101	0.939615			Low:Low:Low:Inf_OAT018	0.0994398
Low:Low:Low:SkeltalMuscle:MS001301	0.876667			Low:Low:Low:CD4_p_helperT:MS000901	0.944483			Low:Low:Low:Inf_OAT019	0.0247593
Low:Low:Low:SkeltalMuscle:MS004701	1			Low:Low:Low:CD4_p_helperT:MS017605	0.879194			Low:Low:Low:Inf_NC005	0.0499622
Low:Low:Low:SkeltalMuscle:MS003901	0.903853			Low:Low:Low:CD4_p_helperT:MS000801	0.913768			Low:Low:Low:Inf_NC007	0.110476
Low:Low:Low:SkeltalMuscle:MS001701	0.90525			Low:Low:Low:CD4_p_helperT:MS003001	0.950741			Low:Low:Low:Inf_OAT018	0.0533383
Low:Low:Low:SkeltalMuscle:MS003601	0.805417			Low:Low:Low:CD4_p_helperT:MS001001	0.964337			Low:Low:Low:Inf_OAT019	0.0213519
Low:Low:Low:SkeltalMuscle:MS001201	0.921481			Low:Low:Low:CD4_p_helperT:MS002701	0.941111			Low:Low:Low:Inf_OAT017	0.0661686
Low:Low:Low:SkeltalMuscle:MS004901	0.8776			Low:Low:Low:CD4_p_helperT:MS032001	0.913509			Low:Low:Low:Inf_NC004	0.0417641
Low:Low:Low:SkeltalMuscle:MS003301	0.858814			Low:Low:Low:CD4_p_helperT:MS002801	0.971765			Low:Low:Low:Inf_NC002	0.0078064
Low:Low:Low:SkeltalMuscle:MS004501	0.92			Low:Low:Low:CD4_p_helperT:MS002901	0.945946			Low:Low:Low:Inf_OAT021	0.0244659
Low:Low:Low:SkeltalMuscle:MS005101	0.939			Low:Low:Low:CD4_p_helperT:MS000701	0.993056			Low:Low:Low:Inf_OAT020	0.0327596
Low:Low:Low:SkeltalMuscle:MS005001	0.867182			Low:Low:Low:CD4_p_helperT:MS000501	0.922791			Low:Low:Low:Inf_NC008	0.0250519
Low:Low:Low:SkeltalMuscle:MS001301	0.858091			Low:Low:Low:CD4_p_helperT:MS002601	0.930526			Low:Low:Low:Inf_OAT015	0.0551625
Low:Low:Low:SkeltalMuscle:MS004701	0.896444			Low:Low:Low:CD4_p_helperT:MS000401	0.895882			Low:Low:Low:Inf_OAT017	0.127429
Low:Low:Low:SkeltalMuscle:MS001501	0.931928			Low:Low:Low:CD4_p_helperT:MS000601	0.833714			Low:Low:Low:Inf_NC002	0.0719006
Low:Low:Low:SkeltalMuscle:MS001801	0.942766			Low:Low:Low:CD4_p_helperT:MS002501	0.9875			Low:Low:Low:Inf_NC004	0.0578996
Low:Low:Low:SkeltalMuscle:MS001901	0.842381			Low:Low:Low:CD4_p_helperT:MS002401	0.972407			Low:Low:Low:Inf_OAT015	0.0944127
Low:Low:Low:SkeltalMuscle:MS003701	0.962887			Low:Low:Low:CD4_p_helperT:MS007903	0.983871			Low:Low:Low:Inf_NC008	0.0663399
Low:Low:Low:SkeltalMuscle:MS004901	0.9			Low:Low:Low:CD4_p_helperT:MS002501	0.975263			Low:Low:Low:Inf_OAT020	0.0556319
Low:Low:Low:SkeltalMuscle:MS003301	0.9375			Low:Low:Low:CD4_p_helperT:MS000601	0.9166			Low:Low:Low:Inf_OAT021	0.0414447
Low:Low:Low:SkeltalMuscle:MS004501	0.9125			Low:Low:Low:CD4_p_helperT:MS002401	0.906842			Low:Low:Low:Inf_OAT018	0.114286
Low:Low:Low:SkeltalMuscle:MS003901	0.899619			Low:Low:Low:CD4_p_helperT:MS007903	0.934783			Low:Low:Low:Inf_NC005	0.30957
Low:Low:Low:SkeltalMuscle:MS001201	0.930351			Low:Low:Low:CD4_p_helperT:MS002601	0.976897			Low:Low:Low:Inf_NC007	0.0987013
Low:Low:Low:SkeltalMuscle:MS001701	0.938286			Low:Low:Low:CD4_p_helperT:MS000501	0.941236			Low:Low:Low:Inf_OAT019	0.0438859
Low:Low:Low:SkeltalMuscle:MS003601	0.875			Low:Low:Low:CD4_p_helperT:MS000401	0.977321			Low:Low:Low:Inf_OAT018	0.0478132
Low:Low:Low:SkeltalMuscle:MS001801	0.94831			Low:Low:Low:CD4_p_helperT:MS002901	0.93125			Low:Low:Low:Inf_NC005	0.0370288
Low:Low:Low:SkeltalMuscle:MS001501	0.9624			Low:Low:Low:CD4_p_helperT:MS002801	0.929863			Low:Low:Low:Inf_NC007	0.06
Low:Low:Low:SkeltalMuscle:MS001901	1			Low:Low:Low:CD4_p_helperT:MS000701	0.932333			Low:Low:Low:Inf_OAT019	0.0379831
Low:Low:Low:SkeltalMuscle:MS003701	0.917961			Low:Low:Low:CD4_p_helperT:MS017605	0.916667			Low:Low:Low:Inf_NC004	0.0134412
Low:Low:Low:SkeltalMuscle:MS005101	0.910714			Low:Low:Low:CD4_p_helperT:MS000801	0.93163			Low:Low:Low:Inf_OAT017	0.0527954
Low:Low:Low:SkeltalMuscle:MS005001	0.916809			Low:Low:Low:CD4_p_helperT:MS001101	0.9745			Low:Low:Low:Inf_NC002	0.0340669
Low:Low:Low:SkeltalMuscle:MS001301	0.91907			Low:Low:Low:CD4_p_helperT:MS000901	0.963103			Low:Low:Low:Inf_OAT015	0.0380247
Low:Low:Low:SkeltalMuscle:MS004701	0.935484			Low:Low:Low:CD4_p_helperT:MS001001	0.956506			Low:Low:Low:Inf_NC008	0.0654195
Low:Low:Low:SkeltalMuscle:MS005101	0.912549			Low:Low:Low:CD4_p_helperT:MS032001	0.901412			Low:Low:Low:Inf_OAT020	0.0600595
Low:Low:Low:SkeltalMuscle:MS005001	0.943402			Low:Low:Low:CD4_p_helperT:MS002701	0.96631			Low:Low:Low:Inf_OAT021	0.0793877
Low:Low:Low:SkeltalMuscle:MS001301	0.950748			Low:Low:Low:CD4_p_helperT:MS003001	0.958333			Low:Low:Low:Inf_OAT019	0.0547619
Low:Low:Low:SkeltalMuscle:MS004701	0.917848			Low:Low:Low:CD4_p_helperT:MS000801	0.984429			Low:Low:Low:Inf_OAT018	0.0397392
Low:Low:Low:SkeltalMuscle:MS001501	0.969375			Low:Low:Low:CD4_p_helperT:MS017605	0.913462			Low:Low:Low:Inf_NC005	0.0612979
Low:Low:Low:SkeltalMuscle:MS001801	0.955362			Low:Low:Low:CD4_p_helperT:MS001101	0.990556			Low:Low:Low:Inf_NC007	0
Low:Low:Low:SkeltalMuscle:MS001901	0.929362			Low:Low:Low:CD4_p_helperT:MS000901	0.969091			Low:Low:Low:Inf_NC008	0.0956845
Low:Low:Low:SkeltalMuscle:MS003701	0.903204			Low:Low:Low:CD4_p_helperT:MS001001	0.930937			Low:Low:Low:Inf_OAT015	0.0925137
Low:Low:Low:SkeltalMuscle:MS003901	0.951979			Low:Low:Low:CD4_p_helperT:MS032001	0.90625			Low:Low:Low:Inf_OAT021	0.0577381
Low:Low:Low:SkeltalMuscle:MS001701	0.936033			Low:Low:Low:CD4_p_helperT:MS002701	0.953433			Low:Low:Low:Inf_OAT020	0.0431379
Low:Low:Low:SkeltalMuscle:MS003601	0.942174			Low:Low:Low:CD4_p_helperT:MS003001	0.974			Low:Low:Low:Inf_NC002	0.10127
Low:Low:Low:SkeltalMuscle:MS001201	0.945403			Low:Low:Low:CD4_p_helperT:MS002901	0.922973			Low:Low:Low:Inf_NC004	0
Low:Low:Low:SkeltalMuscle:MS004901	0.9364			Low:Low:Low:CD4_p_helperT:MS002801	0.986364			Low:Low:Low:Inf_OAT017	0.0484848
Low:Low:Low:SkeltalMuscle:MS003301	1			Low:Low:Low:CD4_p_helperT:MS000701	0.973623			Low:Low:Low:Inf_OAT019	0.0149189
Low:Low:Low:SkeltalMuscle:MS004501	0.848837			Low:Low:Low:CD4_p_helperT:MS002601	1			Low:Low:Low:Inf_NC005	0.133208
Low:Low:Low:SkeltalMuscle:MS005101	0.885686			Low:Low:Low:CD4_p_helperT:MS000501	0.899737			Low:Low:Low:Inf_NC007	0.0307692
Low:Low:Low:SkeltalMuscle:MS005001	0.856882			Low:Low:Low:CD4_p_helperT:MS000401	0.934643			Low:Low:Low:Inf_OAT018	0.0293357
Low:Low:Low:SkeltalMuscle:MS001301	0.875481			Low:Low:Low:CD4_p_helperT:MS002501	0.99381			Low:Low:Low:Inf_OAT021	0.0992369
Low:Low:Low:SkeltalMuscle:MS004701	0.94			Low:Low:Low:CD4_p_helperT:MS000601	0.937213			Low:Low:Low:Inf_OAT020	0
Low:Low:Low:SkeltalMuscle:MS001501	0.898605			Low:Low:Low:CD4_p_helperT:MS002401	0.937097			Low:Low:Low:Inf_NC008	0.0624926
Low:Low:Low:SkeltalMuscle:MS001801	0.941753			Low:Low:Low:CD4_p_helperT:MS007903	0.939231			Low:Low:Low:Inf_OAT015	0.055472
Low:Low:Low:SkeltalMuscle:MS001901	0.939286			Low:Low:Low:CD4_p_helperT:MS002501	0.987778			Low:Low:Low:Inf_NC004	0.0221088
Low:Low:Low:SkeltalMuscle:MS003701	0.896832			Low:Low:Low:CD4_p_helperT:MS000601	0.913137			Low:Low:Low:Inf_NC002	0.0585859
Low:Low:Low:SkeltalMuscle:MS003901	0.890816			Low:Low:Low:CD4_p_helperT:MS002401	0.962957			Low:Low:Low:Inf_OAT017	0.122884
Low:Low:Low:SkeltalMuscle:MS001701	0.875333			Low:Low:Low:CD4_p_helperT:MS007903	1			Low:Low:Low:Inf_OAT019	0.0489574
Low:Low:Low:SkeltalMuscle:MS003601	0.894533			Low:Low:Low:CD4_p_helperT:MS002601	0.933056			Low:Low:Low:Inf_NC005	0.0911117
Low:Low:Low:SkeltalMuscle:MS001201	0.811078			Low:Low:Low:CD4_p_helperT:MS000501	0.966667			Low:Low:Low:Inf_NC007	0
Low:Low:Low:SkeltalMuscle:MS004901	0.883578			Low:Low:Low:CD4_p_helperT:MS000401	0.964603			Low:Low:Low:Inf_OAT018	0.0443609
Low:Low:Low:SkeltalMuscle:MS003301	0.863636			Low:Low:Low:CD4_p_helperT:MS002901	0.976056			Low:Low:Low:Inf_OAT021	0.0109401
Low:Low:Low:SkeltalMuscle:MS004501	0.734324			Low:Low:Low:CD4_p_helperT:MS002801	0.986071			Low:Low:Low:Inf_OAT020	0.105367
Low:Low:Low:SkeltalMuscle:MS004901	0.971029			Low:Low:Low:CD4_p_helperT:MS000701	0.933077			Low:Low:Low:Inf_NC008	0.0165987
Low:Low:Low:SkeltalMuscle:MS003301	0.970357			Low:Low:Low:CD4_p_helperT:MS017605	0.915244			Low:Low:Low:Inf_OAT015	0.0421407
Low:Low:Low:SkeltalMuscle:MS004501	0.901786			Low:Low:Low:CD4_p_helperT:MS000801	0.952192			Low:Low:Low:Inf_NC004	0.0101697
Low:Low:Low:SkeltalMuscle:MS001201	0.96963			Low:Low:Low:CD4_p_helperT:MS000901	0.955			Low:Low:Low:Inf_NC002	0.0393356
Low:Low:Low:SkeltalMuscle:MS001701	0.96			Low:Low:Low:CD4_p_helperT:MS001101	0.935333			Low:Low:Low:Inf_OAT017	0.0266504
Low:Low:Low:SkeltalMuscle:MS003601	0.973958			Low:Low:Low:CD4_p_helperT:MS032001	0.93			Low:Low:Low:Inf_OAT017	0.0266667
Low:Low:Low:SkeltalMuscle:MS003901	0.953966			Low:Low:Low:CD4_p_helperT:MS002701	0.956452			Low:Low:Low:Inf_NC004	0.0382767
Low:Low:Low:SkeltalMuscle:MS001801	0.981429			Low:Low:Low:CD4_p_helperT:MS001001	0.976286			Low:Low:Low:Inf_NC002	0.0524196
Low:Low:Low:SkeltalMuscle:MS001501	0.902941			Low:Low:Low:CD4_p_helperT:MS003001	0.982			Low:Low:Low:Inf_NC008	0.0599451
Low:Low:Low:SkeltalMuscle:MS003701	0.93082			Low:Low:Low:CD4_p_helperT:MS002401	0.968			Low:Low:Low:Inf_OAT015	0.134256
Low:Low:Low:SkeltalMuscle:MS001901	0.976757			Low:Low:Low:CD4_p_helperT:MS007903	0.954043			Low:Low:Low:Inf_OAT021	0.0404193
Low:Low:Low:SkeltalMuscle:MS005101	0.963415			Low:Low:Low:CD4_p_helperT:MS000601	0.972361			Low:Low:Low:Inf_OAT020	0.0735653
Low:Low:Low:SkeltalMuscle:MS004701	0.972333			Low:Low:Low:CD4_p_helperT:MS002501	0.953333			Low:Low:Low:Inf_OAT018	0.0586098
Low:Low:Low:SkeltalMuscle:MS005001	0.950769			Low:Low:Low:CD4_p_helperT:MS000401	0.954776			Low:Low:Low:Inf_NC007	0.0666667
Low:Low:Low:SkeltalMuscle:MS001301	0.94481			Low:Low:Low:CD4_p_helperT:MS000501	0.988769			Low:Low:Low:Inf_NC005	0.196313
Low:Low:Low:SkeltalMuscle:MS005101	0.98			Low:Low:Low:CD4_p_helperT:MS002601	0.945			Low:Low:Low:Inf_OAT019	0.080104
Low:Low:Low:SkeltalMuscle:MS004701	0.884615			Low:Low:Low:CD4_p_helperT:MS000701	0.972877			Low:Low:Low:Inf_OAT019	0.179014
Low:Low:Low:SkeltalMuscle:MS001301	0.935867			Low:Low:Low:CD4_p_helperT:MS002801	0.9956			Low:Low:Low:Inf_NC005	0.227623
Low:Low:Low:SkeltalMuscle:MS005001	0.93825			Low:Low:Low:CD4_p_helperT:MS002901	0.968571			Low:Low:Low:Inf_NC007	0.0813492
Low:Low:Low:SkeltalMuscle:MS001501	0.932752			Low:Low:Low:CD4_p_helperT:MS003001	0.972292			Low:Low:Low:Inf_OAT018	0.236978
Low:Low:Low:SkeltalMuscle:MS001801	0.965263			Low:Low:Low:CD4_p_helperT:MS001001	0.965506			Low:Low:Low:Inf_OAT021	0.0849919
Low:Low:Low:SkeltalMuscle:MS003701	0.947724			Low:Low:Low:CD4_p_helperT:MS002701	0.976364			Low:Low:Low:Inf_OAT020	0.0881536
Low:Low:Low:SkeltalMuscle:MS001901	0.808667			Low:Low:Low:CD4_p_helperT:MS032001	0.962258			Low:Low:Low:Inf_NC008	0.0777
Low:Low:Low:SkeltalMuscle:MS001201	0.95025			Low:Low:Low:CD4_p_helperT:MS001101	0.98			Low:Low:Low:Inf_OAT015	0.0766327
Low:Low:Low:SkeltalMuscle:MS003601	0.876667			Low:Low:Low:CD4_p_helperT:MS000901	0.990471			Low:Low:Low:Inf_NC002	0.0796958
Low:Low:Low:SkeltalMuscle:MS001701	0.934959			Low:Low:Low:CD4_p_helperT:MS017605	0.956897			Low:Low:Low:Inf_OAT017	0.120658
Low:Low:Low:SkeltalMuscle:MS003901	0.96232			Low:Low:Low:CD4_p_helperT:MS000801	0.986224			Low:Low:Low:Inf_NC004	0.0623874
Low:Low:Low:SkeltalMuscle:MS003301	0.964154			Low:Low:Low:CD4_p_helperT:MS002401	0.900377			Low:Low:Low:Inf_OAT019	0.055813
Low:Low:Low:SkeltalMuscle:MS004901	0.93975			Low:Low:Low:CD4_p_helperT:MS007903	0.862941			Low:Low:Low:Inf_NC005	0.210265
Low:Low:Low:SkeltalMuscle:MS004501	0.942813			Low:Low:Low:CD4_p_helperT:MS002501	0.857143			Low:Low:Low:Inf_NC007	0.131667
Low:Low:Low:SkeltalMuscle:MS003901	0.903226			Low:Low:Low:CD4_p_helperT:MS000601	0.942308			Low:Low:Low:Inf_OAT018	0.187532
Low:Low:Low:SkeltalMuscle:MS001701	0.887966			Low:Low:Low:CD4_p_helperT:MS000401	0.901961			Low:Low:Low:Inf_OAT021	0.0406463
Low:Low:Low:SkeltalMuscle:MS001201	0.981707			Low:Low:Low:CD4_p_helperT:MS002601	0.948413			Low:Low:Low:Inf_OAT020	0.0312675
Low:Low:Low:SkeltalMuscle:MS003601	0.892353			Low:Low:Low:CD4_p_helperT:MS000501	0.909884			Low:Low:Low:Inf_NC008	0.0418309
Low:Low:Low:SkeltalMuscle:MS003301	0.948276			Low:Low:Low:CD4_p_helperT:MS000701	0.938559			Low:Low:Low:Inf_OAT015	0.172996
Low:Low:Low:SkeltalMuscle:MS004901	0.838889			Low:Low:Low:CD4_p_helperT:MS002901	0.925556			Low:Low:Low:Inf_OAT017	0.152071
Low:Low:Low:SkeltalMuscle:MS004501	0.925			Low:Low:Low:CD4_p_helperT:MS002801	0.8635			Low:Low:Low:Inf_NC004	0.140789
Low:Low:Low:SkeltalMuscle:MS005101	0.833333			Low:Low:Low:CD4_p_helperT:MS002701	0.946437			Low:Low:Low:Inf_NC002	0.114441
Low:Low:Low:SkeltalMuscle:MS001301	0.856232			Low:Low:Low:CD4_p_helperT:MS032001	0.881071			Low:Low:Low:Inf_NC007	0.0485714
Low:Low:Low:SkeltalMuscle:MS005001	0.949195			Low:Low:Low:CD4_p_helperT:MS001001	0.922273			Low:Low:Low:Inf_NC005	0.167932
Low:Low:Low:SkeltalMuscle:MS004701	1			Low:Low:Low:CD4_p_helperT:MS003001	0.950541			Low:Low:Low:Inf_OAT018	0.0301412
Low:Low:Low:SkeltalMuscle:MS001801	0.956462			Low:Low:Low:CD4_p_helperT:MS000801	0.973529			Low:Low:Low:Inf_OAT019	0.0311594
Low:Low:Low:SkeltalMuscle:MS001501	0.990833			Low:Low:Low:CD4_p_helperT:MS017605	0.907222			Low:Low:Low:Inf_OAT017	0.0260671
Low:Low:Low:SkeltalMuscle:MS001901	0.920455			Low:Low:Low:CD4_p_helperT:MS000901	0.95875			Low:Low:Low:Inf_NC004	0.0298128
Low:Low:Low:SkeltalMuscle:MS003701	0.922059			Low:Low:Low:CD4_p_helperT:MS001101	0.952892			Low:Low:Low:Inf_NC002	0.021976
				Low:Low:Low:CD4_p_helperT:MS000401	0.948718			Low:Low:Low:Inf_OAT020	0.0265031
				Low:Low:Low:CD4_p_helperT:MS002601	0.919551			Low:Low:Low:Inf_OAT021	0.051422
				Low:Low:Low:CD4_p_helperT:MS000501	0.926406			Low:Low:Low:Inf_OAT015	0.0505597
				Low:Low:Low:CD4_p_helperT:MS007903	0.942857			Low:Low:Low:Inf_NC008	0.0432086
				Low:Low:Low:CD4_p_helperT:MS002401	0.961333			Low:Low:Low:Inf_OAT019	0.0372593
				Low:Low:Low:CD4_p_helperT:MS002501	0.994727			Low:Low:Low:Inf_OAT018	0.0341731
				Low:Low:Low:CD4_p_helperT:MS000601	0.97			Low:Low:Low:Inf_NC005	0.157383
				Low:Low:Low:CD4_p_helperT:MS001001	0.950299			Low:Low:Low:Inf_NC007	0.0469246
				Low:Low:Low:CD4_p_helperT:MS032001	0.911774			Low:Low:Low:Inf_NC008	0.0421284
				Low:Low:Low:CD4_p_helperT:MS002701	0.961538			Low:Low:Low:Inf_OAT015	0.0528458
				Low:Low:Low:CD4_p_helperT:MS003001	0.931818			Low:Low:Low:Inf_OAT021	0.0349206
				Low:Low:Low:CD4_p_helperT:MS017605	0.939333			Low:Low:Low:Inf_OAT020	0.0467192
				Low:Low:Low:CD4_p_helperT:MS000801	0.939315			Low:Low:Low:Inf_NC004	0.146098
				Low:Low:Low:CD4_p_helperT:MS001101	0.982			Low:Low:Low:Inf_NC002	0.0441999
				Low:Low:Low:CD4_p_helperT:MS000901	0.957353			Low:Low:Low:Inf_OAT017	0.0931833
				Low:Low:Low:CD4_p_helperT:MS000701	0.96271			Low:Low:Low:Inf_NC004	0.00460829
				Low:Low:Low:CD4_p_helperT:MS002901	0.981481			Low:Low:Low:Inf_NC002	0.0629844
				Low:Low:Low:CD4_p_helperT:MS002801	0.992308			Low:Low:Low:Inf_OAT017	0.123923
				Low:Low:Low:CD4_p_helperT:MS002401	0.970263			Low:Low:Low:Inf_OAT021	0.0397186
				Low:Low:Low:CD4_p_helperT:MS007903	1			Low:Low:Low:Inf_OAT020	0.027971
				Low:Low:Low:CD4_p_helperT:MS002501	0.883			Low:Low:Low:Inf_NC008	0.0356579
				Low:Low:Low:CD4_p_helperT:MS000601	0.941875			Low:Low:Low:Inf_OAT015	0.00292398
				Low:Low:Low:CD4_p_helperT:MS000401	0.908			Low:Low:Low:Inf_NC005	0.0801913
				Low:Low:Low:CD4_p_helperT:MS002601	0.926471			Low:Low:Low:Inf_NC007	0.0166667
				Low:Low:Low:CD4_p_helperT:MS000501	0.956909			Low:Low:Low:Inf_OAT018	0.0268816
				Low:Low:Low:CD4_p_helperT:MS000701	0.951			Low:Low:Low:Inf_OAT019	0.0113636
				Low:Low:Low:CD4_p_helperT:MS002901	0.88			Low:Low:Low:Inf_NC004	0.0870536
				Low:Low:Low:CD4_p_helperT:MS002801	0.971429			Low:Low:Low:Inf_OAT017	0.084127
				Low:Low:Low:CD4_p_helperT:MS001001	0.983191			Low:Low:Low:Inf_NC002	0.12625
				Low:Low:Low:CD4_p_helperT:MS032001	0.908039			Low:Low:Low:Inf_OAT015	0.0818681
				Low:Low:Low:CD4_p_helperT:MS002701	0.989125			Low:Low:Low:Inf_NC008	0.105085
				Low:Low:Low:CD4_p_helperT:MS003001	0.855			Low:Low:Low:Inf_OAT020	0.311111
				Low:Low:Low:CD4_p_helperT:MS000801	0.873158			Low:Low:Low:Inf_OAT021	0.0871636
				Low:Low:Low:CD4_p_helperT:MS017605	0.789474			Low:Low:Low:Inf_OAT018	0.164434
				Low:Low:Low:CD4_p_helperT:MS001101	0.968684			Low:Low:Low:Inf_NC005	0.324352
				Low:Low:Low:CD4_p_helperT:MS000901	0.951132			Low:Low:Low:Inf_NC007	0.179121
				Low:Low:Low:CD4_p_helperT:MS002501	0.963273			Low:Low:Low:Inf_OAT019	0.161645
				Low:Low:Low:CD4_p_helperT:MS000601	0.957564			Low:Low:Low:Inf_NC004	0.0336888
				Low:Low:Low:CD4_p_helperT:MS002401	0.981538			Low:Low:Low:Inf_OAT017	0.0835697
				Low:Low:Low:CD4_p_helperT:MS007903	1			Low:Low:Low:Inf_NC002	0.0699411
				Low:Low:Low:CD4_p_helperT:MS002601	0.97619			Low:Low:Low:Inf_OAT015	0.0462359
				Low:Low:Low:CD4_p_helperT:MS000501	0.918028			Low:Low:Low:Inf_NC008	0.0522445
				Low:Low:Low:CD4_p_helperT:MS000401	0.969204			Low:Low:Low:Inf_OAT020	0.0299647
				Low:Low:Low:CD4_p_helperT:MS002901	0.960649			Low:Low:Low:Inf_OAT021	0.0251877
				Low:Low:Low:CD4_p_helperT:MS002801	0.960843			Low:Low:Low:Inf_OAT018	0.157511
				Low:Low:Low:CD4_p_helperT:MS000701	0.967647			Low:Low:Low:Inf_NC005	0.134275
				Low:Low:Low:CD4_p_helperT:MS000801	0.974023			Low:Low:Low:Inf_NC007	0.0429083
				Low:Low:Low:CD4_p_helperT:MS017605	0.923913			Low:Low:Low:Inf_OAT019	0.0508946
				Low:Low:Low:CD4_p_helperT:MS000901	0.985915			Low:Low:Low:Inf_OAT018	0.0175439
				Low:Low:Low:CD4_p_helperT:MS001101	0.994898			Low:Low:Low:Inf_NC007	0.0229167
				Low:Low:Low:CD4_p_helperT:MS032001	0.961463			Low:Low:Low:Inf_NC005	0.120136
				Low:Low:Low:CD4_p_helperT:MS002701	0.974324			Low:Low:Low:Inf_OAT019	0.125412
				Low:Low:Low:CD4_p_helperT:MS001001	0.979561			Low:Low:Low:Inf_OAT017	0.0800083
				Low:Low:Low:CD4_p_helperT:MS003001	0.991852			Low:Low:Low:Inf_NC002	0.0353009
				Low:Low:Low:CD4_p_helperT:MS002501	0.933333			Low:Low:Low:Inf_NC004	0.035754
				Low:Low:Low:CD4_p_helperT:MS000601	0.962264			Low:Low:Low:Inf_NC008	0.0427919
				Low:Low:Low:CD4_p_helperT:MS007903	0.889167			Low:Low:Low:Inf_OAT015	0.055091
				Low:Low:Low:CD4_p_helperT:MS002401	0.930274			Low:Low:Low:Inf_OAT021	0.0233894
				Low:Low:Low:CD4_p_helperT:MS002601	0.981667			Low:Low:Low:Inf_OAT020	0.0208333
				Low:Low:Low:CD4_p_helperT:MS000501	0.911222			Low:Low:Low:Inf_OAT019	0.0425109
				Low:Low:Low:CD4_p_helperT:MS000401	0.928551			Low:Low:Low:Inf_NC005	0.125147
				Low:Low:Low:CD4_p_helperT:MS002901	0.929538			Low:Low:Low:Inf_NC007	0.0606061
				Low:Low:Low:CD4_p_helperT:MS002801	1			Low:Low:Low:Inf_OAT018	0.0988581
				Low:Low:Low:CD4_p_helperT:MS000701	0.965075			Low:Low:Low:Inf_OAT021	0.0553156
				Low:Low:Low:CD4_p_helperT:MS000801	0.9375			Low:Low:Low:Inf_OAT020	0.0547941
				Low:Low:Low:CD4_p_helperT:MS017605	0.932619			Low:Low:Low:Inf_NC008	0.0829921
				Low:Low:Low:CD4_p_helperT:MS000901	0.96175			Low:Low:Low:Inf_OAT015	0.0843874
				Low:Low:Low:CD4_p_helperT:MS001101	0.991071			Low:Low:Low:Inf_NC002	0.0718707
				Low:Low:Low:CD4_p_helperT:MS032001	0.936543			Low:Low:Low:Inf_NC004	0.0614141
				Low:Low:Low:CD4_p_helperT:MS002701	0.972222			Low:Low:Low:Inf_OAT017	0.149198
				Low:Low:Low:CD4_p_helperT:MS001001	0.97359			Low:Low:Low:Inf_NC002	0.0546454
				Low:Low:Low:CD4_p_helperT:MS003001	0.978857			Low:Low:Low:Inf_NC004	0.0365546
								Low:Low:Low:Inf_OAT017	0.0451128
								Low:Low:Low:Inf_NC008	0.0596588
								Low:Low:Low:Inf_OAT015	0.0617615
								Low:Low:Low:Inf_OAT021	0.0544841
								Low:Low:Low:Inf_OAT020	0.0482323
								Low:Low:Low:Inf_OAT018	0.1114
								Low:Low:Low:Inf_NC007	0.0515406
								Low:Low:Low:Inf_NC005	0.0405345
								Low:Low:Low:Inf_OAT019	0.0363636
								Low:Low:Low:Inf_OAT018	0.110197
								Low:Low:Low:Inf_NC007	0.0545351
								Low:Low:Low:Inf_NC005	0.0877313
								Low:Low:Low:Inf_OAT019	0.153148
								Low:Low:Low:Inf_NC004	0.0352597
								Low:Low:Low:Inf_NC002	0.0537843
								Low:Low:Low:Inf_OAT017	0.20504
								Low:Low:Low:Inf_NC008	0.0784189
								Low:Low:Low:Inf_OAT015	0.0682265
								Low:Low:Low:Inf_OAT021	0.12561
								Low:Low:Low:Inf_OAT020	0.115152
								Low:Low:Low:Inf_OAT018	0.0576118
								Low:Low:Low:Inf_NC007	0.0542857
								Low:Low:Low:Inf_NC005	0.159289
								Low:Low:Low:Inf_OAT019	0.052877
								Low:Low:Low:Inf_NC004	0.0404262
								Low:Low:Low:Inf_NC002	0.0543854
								Low:Low:Low:Inf_OAT017	0.0549107
								Low:Low:Low:Inf_OAT015	0.0286325
								Low:Low:Low:Inf_NC008	0.0382195
								Low:Low:Low:Inf_OAT020	0.0775276
								Low:Low:Low:Inf_OAT021	0.0253968
								Low:High:Low:Inf_OAT019	0.22686
								Low:High:Low:Inf_NC005	0.823367
								Low:High:Low:Inf_NC007	0.673434
								Low:High:Low:Inf_OAT018	0.721237
								Low:High:Low:Inf_OAT021	0.190046
								Low:High:Low:Inf_OAT020	0.628687
								Low:High:Low:Inf_NC008	0.424464
								Low:High:Low:Inf_OAT015	0.672474
								Low:High:Low:Inf_NC004	0.550108
								Low:High:Low:Inf_NC002	0.723693
								Low:High:Low:Inf_OAT017	0.359808
								Low:High:Low:Inf_OAT019	0.180179
								Low:High:Low:Inf_NC007	0.463269
								Low:High:Low:Inf_NC005	0.739449
								Low:High:Low:Inf_OAT018	0.505917
								Low:High:Low:Inf_OAT021	0.217945
								Low:High:Low:Inf_OAT020	0.420533
								Low:High:Low:Inf_NC008	0.312592
								Low:High:Low:Inf_OAT015	0.433271
								Low:High:Low:Inf_NC002	0.551151
								Low:High:Low:Inf_OAT017	0.163429
								Low:High:Low:Inf_NC004	0.290595
								Low:High:Low:Inf_OAT019	0.364196
								Low:High:Low:Inf_OAT018	0.785359
								Low:High:Low:Inf_NC007	0.513095
								Low:High:Low:Inf_NC005	0.659712
								Low:High:Low:Inf_NC008	0.539962
								Low:High:Low:Inf_OAT015	0.540453
								Low:High:Low:Inf_OAT021	0.134745
								Low:High:Low:Inf_OAT020	0.364443
								Low:High:Low:Inf_NC004	0.306574
								Low:High:Low:Inf_NC002	0.690898
								Low:High:Low:Inf_OAT017	0.256035
								Low:High:Low:Inf_OAT019	0.140493
								Low:High:Low:Inf_OAT018	0.200216
								Low:High:Low:Inf_NC005	0.674395
								Low:High:Low:Inf_NC007	0.287302
								Low:High:Low:Inf_NC008	0.446313
								Low:High:Low:Inf_OAT015	0.474323
								Low:High:Low:Inf_OAT021	0.249258
								Low:High:Low:Inf_OAT020	0.316655
								Low:High:Low:Inf_OAT017	0.507833
								Low:High:Low:Inf_NC002	0.489587
								Low:High:Low:Inf_NC004	0.226663
								Low:High:Low:Inf_NC004	0.385313
								Low:High:Low:Inf_OAT017	0.611783
								Low:High:Low:Inf_NC002	0.825814
								Low:High:Low:Inf_NC008	0.638141
								Low:High:Low:Inf_OAT015	0.854101
								Low:High:Low:Inf_OAT021	0.241407
								Low:High:Low:Inf_OAT020	0.649689
								Low:High:Low:Inf_OAT018	0.867622
								Low:High:Low:Inf_NC007	0.678401
								Low:High:Low:Inf_NC005	0.84109
								Low:High:Low:Inf_OAT019	0.341595
								Low:High:Low:Inf_NC002	0.746403
								Low:High:Low:Inf_NC004	0.642021
								Low:High:Low:Inf_OAT017	0.389923
								Low:High:Low:Inf_OAT020	0.624399
								Low:High:Low:Inf_OAT021	0.301522
								Low:High:Low:Inf_OAT015	0.836506
								Low:High:Low:Inf_NC008	0.680452
								Low:High:Low:Inf_NC005	0.8374
								Low:High:Low:Inf_NC007	0.585088
								Low:High:Low:Inf_OAT018	0.724389
								Low:High:Low:Inf_OAT019	0.381009
								Low:High:Low:Inf_OAT021	0.0154401
								Low:High:Low:Inf_OAT020	0.706475
								Low:High:Low:Inf_NC008	0.190965
								Low:High:Low:Inf_OAT015	0.434524
								Low:High:Low:Inf_NC002	0.543808
								Low:High:Low:Inf_NC004	0.299602
								Low:High:Low:Inf_OAT017	0.219345
								Low:High:Low:Inf_OAT019	0.147736
								Low:High:Low:Inf_NC005	0.53385
								Low:High:Low:Inf_NC007	0.169122
								Low:High:Low:Inf_OAT018	0.22721
								Low:High:Low:Inf_OAT019	0.191397
								Low:High:Low:Inf_OAT018	0.0783353
								Low:High:Low:Inf_NC005	0.363609
								Low:High:Low:Inf_NC007	0.100573
								Low:High:Low:Inf_NC008	0.146085
								Low:High:Low:Inf_OAT015	0.195181
								Low:High:Low:Inf_OAT021	0.141543
								Low:High:Low:Inf_OAT020	0.129184
								Low:High:Low:Inf_OAT017	0.0829507
								Low:High:Low:Inf_NC004	0.117189
								Low:High:Low:Inf_NC002	0.454667
								Low:High:Low:Inf_OAT017	0.379466
								Low:High:Low:Inf_NC004	0.284276
								Low:High:Low:Inf_NC002	0.600968
								Low:High:Low:Inf_NC008	0.356324
								Low:High:Low:Inf_OAT015	0.690502
								Low:High:Low:Inf_OAT021	0.208612
								Low:High:Low:Inf_OAT020	0.322388
								Low:High:Low:Inf_OAT018	0.538737
								Low:High:Low:Inf_NC005	0.832293
								Low:High:Low:Inf_NC007	0.50989
								Low:High:Low:Inf_OAT019	0.280895
								Low:High:Low:Inf_OAT019	0.238221
								Low:High:Low:Inf_NC007	0.406052
								Low:High:Low:Inf_NC005	0.658069
								Low:High:Low:Inf_OAT018	0.587328
								Low:High:Low:Inf_OAT021	0.151394
								Low:High:Low:Inf_OAT020	0.438584
								Low:High:Low:Inf_NC008	0.534567
								Low:High:Low:Inf_OAT015	0.494691
								Low:High:Low:Inf_NC002	0.530783
								Low:High:Low:Inf_NC004	0.169695
								Low:High:Low:Inf_OAT017	0.242612
								Low:High:Low:Inf_OAT021	0.234316
								Low:High:Low:Inf_OAT020	0.585259
								Low:High:Low:Inf_NC008	0.454839
								Low:High:Low:Inf_OAT015	0.712484
								Low:High:Low:Inf_NC002	0.393891
								Low:High:Low:Inf_OAT017	0.101095
								Low:High:Low:Inf_NC004	0.417659
								Low:High:Low:Inf_OAT019	0.176177
								Low:High:Low:Inf_NC007	0.310417
								Low:High:Low:Inf_NC005	0.62781
								Low:High:Low:Inf_OAT018	0.780952
								Low:High:Low:Inf_NC005	0.779278
								Low:High:Low:Inf_NC007	0.589563
								Low:High:Low:Inf_OAT018	0.649863
								Low:High:Low:Inf_OAT019	0.251079
								Low:High:Low:Inf_NC004	0.184152
								Low:High:Low:Inf_OAT017	0.318492
								Low:High:Low:Inf_NC002	0.624697
								Low:High:Low:Inf_OAT021	0.34123
								Low:High:Low:Inf_OAT020	0.625371
								Low:High:Low:Inf_NC008	0.604377
								Low:High:Low:Inf_OAT015	0.675528
								Low:High:Low:Inf_OAT015	0.158841
								Low:High:Low:Inf_NC008	0.165107
								Low:High:Low:Inf_OAT020	0.28618
								Low:High:Low:Inf_OAT021	0.0343197
								Low:High:Low:Inf_NC002	0.201691
								Low:High:Low:Inf_OAT017	0.105873
								Low:High:Low:Inf_NC004	0.144325
								Low:High:Low:Inf_OAT019	0.106733
								Low:High:Low:Inf_OAT018	0.18146
								Low:High:Low:Inf_NC007	0.0845238
								Low:High:Low:Inf_NC005	0.438608
								Low:High:Low:Inf_OAT019	0.392404
								Low:High:Low:Inf_NC005	0.737484
								Low:High:Low:Inf_NC007	0.352814
								Low:High:Low:Inf_OAT018	0.0929894
								Low:High:Low:Inf_OAT020	0.613553
								Low:High:Low:Inf_OAT021	0.123469
								Low:High:Low:Inf_OAT015	0.6823
								Low:High:Low:Inf_NC008	0.210762
								Low:High:Low:Inf_NC004	0.50014
								Low:High:Low:Inf_OAT017	0.0308598
								Low:High:Low:Inf_NC002	0.516628
								Low:High:Low:Inf_OAT019	0.131018
								Low:High:Low:Inf_OAT018	0.325794
								Low:High:Low:Inf_NC007	0.394372
								Low:High:Low:Inf_NC005	0.680403
								Low:High:Low:Inf_OAT015	0.492627
								Low:High:Low:Inf_NC008	0.344502
								Low:High:Low:Inf_OAT020	0.484069
								Low:High:Low:Inf_OAT021	0.314589
								Low:High:Low:Inf_NC002	0.420664
								Low:High:Low:Inf_NC004	0.136491
								Low:High:Low:Inf_OAT017	0.397778
								Low:High:Low:Inf_OAT017	0.0676988
								Low:High:Low:Inf_NC004	0.438971
								Low:High:Low:Inf_NC002	0.650095
								Low:High:Low:Inf_OAT021	0.10856
								Low:High:Low:Inf_OAT020	0.436583
								Low:High:Low:Inf_NC008	0.339207
								Low:High:Low:Inf_OAT015	0.636074
								Low:High:Low:Inf_NC005	0.754513
								Low:High:Low:Inf_NC007	0.203492
								Low:High:Low:Inf_OAT018	0.424582
								Low:High:Low:Inf_OAT019	0.35156
								Low:High:Low:Inf_NC004	0.184554
								Low:High:Low:Inf_NC002	0.676601
								Low:High:Low:Inf_OAT017	0.390729
								Low:High:Low:Inf_OAT015	0.785731
								Low:High:Low:Inf_NC008	0.507044
								Low:High:Low:Inf_OAT020	0.631482
								Low:High:Low:Inf_OAT021	0.287293
								Low:High:Low:Inf_OAT018	0.775775
								Low:High:Low:Inf_NC007	0.753402
								Low:High:Low:Inf_NC005	0.795531
								Low:High:Low:Inf_OAT019	0.415723
								Low:High:Low:Inf_OAT015	0.642188
								Low:High:Low:Inf_NC008	0.376786
								Low:High:Low:Inf_OAT020	0.523115
								Low:High:Low:Inf_OAT021	0.201631
								Low:High:Low:Inf_OAT017	0.190909
								Low:High:Low:Inf_NC002	0.376802
								Low:High:Low:Inf_NC004	0.438312
								Low:High:Low:Inf_OAT019	0.133214
								Low:High:Low:Inf_OAT018	0.430038
								Low:High:Low:Inf_NC007	0.34
								Low:High:Low:Inf_NC005	0.565265
								Low:High:Low:Inf_OAT019	0.199312
								Low:High:Low:Inf_NC007	0.328571
								Low:High:Low:Inf_NC005	0.738528
								Low:High:Low:Inf_OAT018	0.310787
								Low:High:Low:Inf_OAT020	0.0511638
								Low:High:Low:Inf_OAT021	0.316997
								Low:High:Low:Inf_OAT015	0.452402
								Low:High:Low:Inf_NC008	0.326194
								Low:High:Low:Inf_NC004	0.274687
								Low:High:Low:Inf_NC002	0.352135
								Low:High:Low:Inf_OAT017	0.196685
								Low:High:Low:Inf_OAT018	0.224385
								Low:High:Low:Inf_NC005	0.59087
								Low:High:Low:Inf_NC007	0.212057
								Low:High:Low:Inf_OAT019	0.109799
								Low:High:Low:Inf_NC002	0.328293
								Low:High:Low:Inf_NC004	0.181265
								Low:High:Low:Inf_OAT017	0.103727
								Low:High:Low:Inf_OAT015	0.360536
								Low:High:Low:Inf_NC008	0.262957
								Low:High:Low:Inf_OAT020	0.205648
								Low:High:Low:Inf_OAT021	0.0625283
								Low:High:Low:Inf_NC002	0.86871
								Low:High:Low:Inf_NC004	0.20959
								Low:High:Low:Inf_OAT017	0.475552
								Low:High:Low:Inf_OAT015	0.727599
								Low:High:Low:Inf_NC008	0.572023
								Low:High:Low:Inf_OAT020	0.641744
								Low:High:Low:Inf_OAT021	0.227702
								Low:High:Low:Inf_OAT018	0.717111
								Low:High:Low:Inf_NC007	0.624542
								Low:High:Low:Inf_NC005	0.714525
								Low:High:Low:Inf_OAT019	0.202933
								Low:High:Low:Inf_NC005	0.862661
								Low:High:Low:Inf_NC007	0.375
								Low:High:Low:Inf_OAT018	0.700534
								Low:High:Low:Inf_OAT019	0.114669
								Low:High:Low:Inf_OAT017	0.282296
								Low:High:Low:Inf_NC004	0.171429
								Low:High:Low:Inf_NC002	0.780093
								Low:High:Low:Inf_OAT020	0.361745
								Low:High:Low:Inf_OAT021	0.292292
								Low:High:Low:Inf_OAT015	0.775413
								Low:High:Low:Inf_NC008	0.605149
								Low:High:Low:Inf_NC002	0.152952
								Low:High:Low:Inf_NC004	0.0911688
								Low:High:Low:Inf_OAT017	0.161958
								Low:High:Low:Inf_OAT015	0.259875
								Low:High:Low:Inf_NC008	0.145934
								Low:High:Low:Inf_OAT020	0.113194
								Low:High:Low:Inf_OAT021	0.0595238
								Low:High:Low:Inf_OAT018	0.162313
								Low:High:Low:Inf_NC005	0.561374
								Low:High:Low:Inf_NC007	0.0918768
								Low:High:Low:Inf_OAT019	0.11483
								Low:High:Low:Inf_NC004	0.449303
								Low:High:Low:Inf_OAT017	0.100617
								Low:High:Low:Inf_NC002	0.666055
								Low:High:Low:Inf_OAT020	0.631503
								Low:High:Low:Inf_OAT021	0.264128
								Low:High:Low:Inf_OAT015	0.679737
								Low:High:Low:Inf_NC008	0.487114
								Low:High:Low:Inf_NC007	0.533333
								Low:High:Low:Inf_NC005	0.819207
								Low:High:Low:Inf_OAT018	0.730169
								Low:High:Low:Inf_OAT019	0.398968
								Low:High:Low:Inf_OAT017	0.514158
								Low:High:Low:Inf_NC002	0.750052
								Low:High:Low:Inf_NC004	0.39083
								Low:High:Low:Inf_OAT021	0.417693
								Low:High:Low:Inf_OAT020	0.669344
								Low:High:Low:Inf_NC008	0.759077
								Low:High:Low:Inf_OAT015	0.854625
								Low:High:Low:Inf_NC007	0.573333
								Low:High:Low:Inf_NC005	0.775942
								Low:High:Low:Inf_OAT018	0.85165
								Low:High:Low:Inf_OAT019	0.337328
								Low:High:Low:Inf_OAT019	0.198958
								Low:High:Low:Inf_NC007	0.211111
								Low:High:Low:Inf_NC005	0.73873
								Low:High:Low:Inf_OAT018	0.548238
								Low:High:Low:Inf_OAT020	0.299206
								Low:High:Low:Inf_OAT021	0.169643
								Low:High:Low:Inf_OAT015	0.651423
								Low:High:Low:Inf_NC008	0.322364
								Low:High:Low:Inf_NC002	0.476391
								Low:High:Low:Inf_OAT017	0.32031
								Low:High:Low:Inf_NC004	0.167254
								Low:High:Low:Inf_OAT019	0.159045
								Low:High:Low:Inf_OAT018	0.185913
								Low:High:Low:Inf_NC007	0.208942
								Low:High:Low:Inf_NC005	0.900366
								Low:High:Low:Inf_NC008	0.365144
								Low:High:Low:Inf_OAT015	0.369707
								Low:High:Low:Inf_OAT021	0.200606
								Low:High:Low:Inf_OAT020	0.471886
								Low:High:Low:Inf_NC004	0.296296
								Low:High:Low:Inf_NC002	0.481561
								Low:High:Low:Inf_OAT017	0.0916731
								Low:High:Low:Inf_NC008	0.320385
								Low:High:Low:Inf_OAT015	0.22371
								Low:High:Low:Inf_OAT021	0.159213
								Low:High:Low:Inf_OAT020	0.474383
								Low:High:Low:Inf_NC002	0.333981
								Low:High:Low:Inf_NC004	0.153968
								Low:High:Low:Inf_OAT017	0.1375
								Low:High:Low:Inf_OAT019	0.218773
								Low:High:Low:Inf_OAT018	0.453406
								Low:High:Low:Inf_NC005	0.662419
								Low:High:Low:Inf_NC007	0.269524
								Low:High:Low:Inf_OAT020	0.708101
								Low:High:Low:Inf_OAT021	0.196488
								Low:High:Low:Inf_OAT015	0.792584
								Low:High:Low:Inf_NC008	0.406971
								Low:High:Low:Inf_NC002	0.530869
								Low:High:Low:Inf_NC004	0.462421
								Low:High:Low:Inf_OAT017	0.302856
								Low:High:Low:Inf_OAT019	0.279661
								Low:High:Low:Inf_NC005	0.808989
								Low:High:Low:Inf_NC007	0.597711
								Low:High:Low:Inf_OAT018	0.585298
								Low:High:Low:Inf_NC002	0.773029
								Low:High:Low:Inf_OAT017	0.477966
								Low:High:Low:Inf_NC004	0.520813
								Low:High:Low:Inf_NC008	0.711576
								Low:High:Low:Inf_OAT015	0.843483
								Low:High:Low:Inf_OAT021	0.342082
								Low:High:Low:Inf_OAT020	0.797377
								Low:High:Low:Inf_OAT018	0.776181
								Low:High:Low:Inf_NC007	0.750298
								Low:High:Low:Inf_NC005	0.870779
								Low:High:Low:Inf_OAT019	0.466635
								Low:High:Low:Inf_NC004	0.260209
								Low:High:Low:Inf_OAT017	0.209517
								Low:High:Low:Inf_NC002	0.551871
								Low:High:Low:Inf_OAT020	0.385918
								Low:High:Low:Inf_OAT021	0.285006
								Low:High:Low:Inf_OAT015	0.451453
								Low:High:Low:Inf_NC008	0.610112
								Low:High:Low:Inf_NC007	0.477688
								Low:High:Low:Inf_NC005	0.73523
								Low:High:Low:Inf_OAT018	0.67043
								Low:High:Low:Inf_OAT019	0.183474
								Low:High:Low:Inf_NC007	0.433333
								Low:High:Low:Inf_NC005	0.828182
								Low:High:Low:Inf_OAT018	0.351005
								Low:High:Low:Inf_OAT019	0.248245
								Low:High:Low:Inf_NC004	0.264371
								Low:High:Low:Inf_OAT017	0.4032
								Low:High:Low:Inf_NC002	0.658622
								Low:High:Low:Inf_OAT020	0.546176
								Low:High:Low:Inf_OAT021	0.294528
								Low:High:Low:Inf_OAT015	0.452471
								Low:High:Low:Inf_NC008	0.491714
								Low:High:Low:Inf_OAT019	0.132485
								Low:High:Low:Inf_OAT018	0.601251
								Low:High:Low:Inf_NC005	0.843167
								Low:High:Low:Inf_NC007	0.360293
								Low:High:Low:Inf_NC008	0.41261
								Low:High:Low:Inf_OAT015	0.663614
								Low:High:Low:Inf_OAT021	0.119749
								Low:High:Low:Inf_OAT020	0.463136
								Low:High:Low:Inf_OAT017	0.308229
								Low:High:Low:Inf_NC004	0.280851
								Low:High:Low:Inf_NC002	0.396793
								Low:High:Low:Inf_OAT019	0.327656
								Low:High:Low:Inf_NC007	0.641667
								Low:High:Low:Inf_NC005	0.776338
								Low:High:Low:Inf_OAT018	0.81061
								Low:High:Low:Inf_OAT021	0.500603
								Low:High:Low:Inf_OAT020	0.855855
								Low:High:Low:Inf_NC008	0.761529
								Low:High:Low:Inf_OAT015	0.820164
								Low:High:Low:Inf_NC002	0.864486
								Low:High:Low:Inf_NC004	0.541065
								Low:High:Low:Inf_OAT017	0.646737
								High:High:High:Inf_NC002	0.829919
								High:High:High:Inf_NC004	0.896805
								High:High:High:Inf_OAT017	0.838756
								High:High:High:Inf_OAT015	0.843605
								High:High:High:Inf_NC008	0.817624
								High:High:High:Inf_OAT020	0.874787
								High:High:High:Inf_OAT021	0.893028
								High:High:High:Inf_OAT018	0.886904
								High:High:High:Inf_NC007	0.824892
								High:High:High:Inf_NC005	0.886119
								High:High:High:Inf_OAT019	0.8799
								High:High:High:Inf_OAT019	0.614395
								High:High:High:Inf_NC007	0.511538
								High:High:High:Inf_NC005	0.629929
								High:High:High:Inf_OAT018	0.66827
								High:High:High:Inf_OAT021	0.637202
								High:High:High:Inf_OAT020	0.679271
								High:High:High:Inf_NC008	0.630014
								High:High:High:Inf_OAT015	0.704161
								High:High:High:Inf_NC002	0.58829
								High:High:High:Inf_NC004	0.556238
								High:High:High:Inf_OAT017	0.551776
								High:High:High:Inf_NC004	0.603537
								High:High:High:Inf_OAT017	0.634384
								High:High:High:Inf_NC002	0.581225
								High:High:High:Inf_OAT015	0.674991
								High:High:High:Inf_NC008	0.615248
								High:High:High:Inf_OAT020	0.61297
								High:High:High:Inf_OAT021	0.581161
								High:High:High:Inf_OAT018	0.742208
								High:High:High:Inf_NC005	0.565295
								High:High:High:Inf_NC007	0.569351
								High:High:High:Inf_OAT019	0.651656
								High:High:High:Inf_NC007	0.71852
								High:High:High:Inf_NC005	0.407754
								High:High:High:Inf_OAT018	0.736104
								High:High:High:Inf_OAT019	0.542605
								High:High:High:Inf_NC002	0.414033
								High:High:High:Inf_NC004	0.622866
								High:High:High:Inf_OAT017	0.640658
								High:High:High:Inf_OAT021	0.693224
								High:High:High:Inf_OAT020	0.54526
								High:High:High:Inf_NC008	0.496913
								High:High:High:Inf_OAT015	0.700703
								High:High:High:Inf_OAT015	0.937591
								High:High:High:Inf_NC008	0.865409
								High:High:High:Inf_OAT020	0.921973
								High:High:High:Inf_OAT021	0.892042
								High:High:High:Inf_OAT017	0.935847
								High:High:High:Inf_NC004	0.839355
								High:High:High:Inf_NC002	0.892334
								High:High:High:Inf_OAT019	0.843886
								High:High:High:Inf_OAT018	0.912736
								High:High:High:Inf_NC005	0.842698
								High:High:High:Inf_NC007	0.907319
								High:High:High:Inf_NC007	0.894906
								High:High:High:Inf_NC005	0.898181
								High:High:High:Inf_OAT018	0.917721
								High:High:High:Inf_OAT019	0.899686
								High:High:High:Inf_NC002	0.889954
								High:High:High:Inf_OAT017	0.89047
								High:High:High:Inf_NC004	0.908207
								High:High:High:Inf_OAT020	0.903621
								High:High:High:Inf_OAT021	0.917464
								High:High:High:Inf_OAT015	0.936307
								High:High:High:Inf_NC008	0.908852
								High:High:High:Inf_OAT018	0.957293
								High:High:High:Inf_NC007	0.951515
								High:High:High:Inf_NC005	0.831577
								High:High:High:Inf_OAT019	0.861242
								High:High:High:Inf_NC004	0.93913
								High:High:High:Inf_NC002	0.905576
								High:High:High:Inf_OAT017	0.913505
								High:High:High:Inf_NC008	0.918012
								High:High:High:Inf_OAT015	0.936533
								High:High:High:Inf_OAT021	0.904196
								High:High:High:Inf_OAT020	0.934589
								High:High:High:Inf_OAT019	0.645257
								High:High:High:Inf_NC007	0.753711
								High:High:High:Inf_NC005	0.76677
								High:High:High:Inf_OAT018	0.901423
								High:High:High:Inf_OAT020	0.85954
								High:High:High:Inf_OAT021	0.729951
								High:High:High:Inf_OAT015	0.921154
								High:High:High:Inf_NC008	0.617994
								High:High:High:Inf_NC004	0.652726
								High:High:High:Inf_NC002	0.723335
								High:High:High:Inf_OAT017	0.72245
								High:High:High:Inf_OAT017	0.519252
								High:High:High:Inf_NC004	0.281323
								High:High:High:Inf_NC002	0.408848
								High:High:High:Inf_NC008	0.177853
								High:High:High:Inf_OAT015	0.390752
								High:High:High:Inf_OAT021	0.685605
								High:High:High:Inf_OAT020	0.487873
								High:High:High:Inf_OAT018	0.862376
								High:High:High:Inf_NC007	0.575136
								High:High:High:Inf_NC005	0.464239
								High:High:High:Inf_OAT019	0.24596
								High:High:High:Inf_NC002	0.915628
								High:High:High:Inf_NC004	0.920778
								High:High:High:Inf_OAT017	0.882946
								High:High:High:Inf_OAT020	0.922113
								High:High:High:Inf_OAT021	0.925911
								High:High:High:Inf_OAT015	0.901734
								High:High:High:Inf_NC008	0.900237
								High:High:High:Inf_NC007	0.989011
								High:High:High:Inf_NC005	0.918269
								High:High:High:Inf_OAT018	0.877601
								High:High:High:Inf_OAT019	0.898824
								High:High:High:Inf_OAT019	0.873975
								High:High:High:Inf_OAT018	0.892312
								High:High:High:Inf_NC005	0.918058
								High:High:High:Inf_NC007	0.988636
								High:High:High:Inf_OAT015	0.898452
								High:High:High:Inf_NC008	0.851004
								High:High:High:Inf_OAT020	0.861404
								High:High:High:Inf_OAT021	0.946276
								High:High:High:Inf_NC002	0.85293
								High:High:High:Inf_NC004	0.814768
								High:High:High:Inf_OAT017	0.913674
								High:High:High:Inf_NC002	0.827607
								High:High:High:Inf_OAT017	0.85895
								High:High:High:Inf_NC004	0.613443
								High:High:High:Inf_OAT020	0.849208
								High:High:High:Inf_OAT021	0.794483
								High:High:High:Inf_OAT015	0.812497
								High:High:High:Inf_NC008	0.799805
								High:High:High:Inf_NC005	0.912563
								High:High:High:Inf_NC007	0.76436
								High:High:High:Inf_OAT018	0.868844
								High:High:High:Inf_OAT019	0.728643
								High:High:High:Inf_OAT019	0.723094
								High:High:High:Inf_NC005	0.844546
								High:High:High:Inf_NC007	0.882443
								High:High:High:Inf_OAT018	0.888512
								High:High:High:Inf_OAT020	0.903014
								High:High:High:Inf_OAT021	0.883101
								High:High:High:Inf_OAT015	0.885242
								High:High:High:Inf_NC008	0.734565
								High:High:High:Inf_NC004	0.888872
								High:High:High:Inf_NC002	0.859381
								High:High:High:Inf_OAT017	0.840618
								High:High:High:Inf_OAT018	0.758035
								High:High:High:Inf_NC007	0.653333
								High:High:High:Inf_NC005	0.436606
								High:High:High:Inf_OAT019	0.396861
								High:High:High:Inf_NC004	0.46531
								High:High:High:Inf_NC002	0.614371
								High:High:High:Inf_OAT017	0.382628
								High:High:High:Inf_NC008	0.326229
								High:High:High:Inf_OAT015	0.792651
								High:High:High:Inf_OAT021	0.692415
								High:High:High:Inf_OAT020	0.665853
								High:High:High:Inf_NC002	0.850146
								High:High:High:Inf_OAT017	0.797267
								High:High:High:Inf_NC004	0.846746
								High:High:High:Inf_OAT020	0.868166
								High:High:High:Inf_OAT021	0.852452
								High:High:High:Inf_OAT015	0.915799
								High:High:High:Inf_NC008	0.843967
								High:High:High:Inf_NC007	0.817155
								High:High:High:Inf_NC005	0.790491
								High:High:High:Inf_OAT018	0.862599
								High:High:High:Inf_OAT019	0.766318
								High:High:High:Inf_OAT019	0.836887
								High:High:High:Inf_NC007	0.871338
								High:High:High:Inf_NC005	0.837205
								High:High:High:Inf_OAT018	0.926133
								High:High:High:Inf_OAT021	0.869551
								High:High:High:Inf_OAT020	0.883001
								High:High:High:Inf_NC008	0.754182
								High:High:High:Inf_OAT015	0.911551
								High:High:High:Inf_OAT017	0.772482
								High:High:High:Inf_NC004	0.724808
								High:High:High:Inf_NC002	0.791435
								High:High:High:Inf_OAT015	0.885472
								High:High:High:Inf_NC008	0.825951
								High:High:High:Inf_OAT020	0.89323
								High:High:High:Inf_OAT021	0.884252
								High:High:High:Inf_NC002	0.818097
								High:High:High:Inf_OAT017	0.87412
								High:High:High:Inf_NC004	0.826743
								High:High:High:Inf_OAT019	0.817553
								High:High:High:Inf_OAT018	0.940997
								High:High:High:Inf_NC005	0.824843
								High:High:High:Inf_NC007	0.850893
								High:High:High:Inf_OAT021	0.501905
								High:High:High:Inf_OAT020	0.533571
								High:High:High:Inf_NC008	0.104789
								High:High:High:Inf_OAT015	0.762218
								High:High:High:Inf_NC004	0.564674
								High:High:High:Inf_OAT017	0.483503
								High:High:High:Inf_NC002	0.392424
								High:High:High:Inf_OAT019	0.418212
								High:High:High:Inf_NC007	0.37619
								High:High:High:Inf_NC005	0.380482
								High:High:High:Inf_OAT018	0.740972
								High:High:High:Inf_OAT015	0.927103
								High:High:High:Inf_NC008	0.922558
								High:High:High:Inf_OAT020	0.889698
								High:High:High:Inf_OAT021	0.929601
								High:High:High:Inf_NC002	0.919029
								High:High:High:Inf_OAT017	0.9449
								High:High:High:Inf_NC004	0.912343
								High:High:High:Inf_OAT019	0.909657
								High:High:High:Inf_OAT018	0.87984
								High:High:High:Inf_NC005	0.897848
								High:High:High:Inf_NC007	0.87306
								High:High:High:Inf_NC005	0.903813
								High:High:High:Inf_NC007	0.9597
								High:High:High:Inf_OAT018	0.903565
								High:High:High:Inf_OAT019	0.87052
								High:High:High:Inf_NC002	0.899239
								High:High:High:Inf_NC004	0.868717
								High:High:High:Inf_OAT017	0.834881
								High:High:High:Inf_OAT021	0.912737
								High:High:High:Inf_OAT020	0.895129
								High:High:High:Inf_NC008	0.935072
								High:High:High:Inf_OAT015	0.899864
								High:High:High:Inf_NC002	0.569968
								High:High:High:Inf_NC004	0.739512
								High:High:High:Inf_OAT017	0.668298
								High:High:High:Inf_OAT020	0.719428
								High:High:High:Inf_OAT021	0.778351
								High:High:High:Inf_OAT015	0.92208
								High:High:High:Inf_NC008	0.560902
								High:High:High:Inf_NC005	0.681586
								High:High:High:Inf_NC007	0.824074
								High:High:High:Inf_OAT018	0.929592
								High:High:High:Inf_OAT019	0.554684
								High:High:High:Inf_OAT019	0.809397
								High:High:High:Inf_NC005	0.89175
								High:High:High:Inf_NC007	0.911723
								High:High:High:Inf_OAT018	0.942569
								High:High:High:Inf_OAT021	0.885783
								High:High:High:Inf_OAT020	0.920817
								High:High:High:Inf_NC008	0.857851
								High:High:High:Inf_OAT015	0.911929
								High:High:High:Inf_NC004	0.886701
								High:High:High:Inf_NC002	0.926781
								High:High:High:Inf_OAT017	0.86457
								High:High:High:Inf_OAT021	0.858776
								High:High:High:Inf_OAT020	0.946032
								High:High:High:Inf_NC008	0.841396
								High:High:High:Inf_OAT015	0.895037
								High:High:High:Inf_NC002	0.878557
								High:High:High:Inf_NC004	0.897158
								High:High:High:Inf_OAT017	0.828912
								High:High:High:Inf_OAT019	0.894872
								High:High:High:Inf_NC005	0.88028
								High:High:High:Inf_NC007	0.944444
								High:High:High:Inf_OAT018	0.831097
								High:High:High:Inf_NC002	0.894404
								High:High:High:Inf_NC004	0.895803
								High:High:High:Inf_OAT017	0.90571
								High:High:High:Inf_OAT021	0.868057
								High:High:High:Inf_OAT020	0.918937
								High:High:High:Inf_NC008	0.918196
								High:High:High:Inf_OAT015	0.914877
								High:High:High:Inf_NC007	0.879609
								High:High:High:Inf_NC005	0.878757
								High:High:High:Inf_OAT018	0.908196
								High:High:High:Inf_OAT019	0.943216
								High:High:High:Inf_NC004	0.880504
								High:High:High:Inf_NC002	0.899829
								High:High:High:Inf_OAT017	0.878684
								High:High:High:Inf_NC008	0.892253
								High:High:High:Inf_OAT015	0.925055
								High:High:High:Inf_OAT021	0.86992
								High:High:High:Inf_OAT020	0.889383
								High:High:High:Inf_OAT018	0.91529
								High:High:High:Inf_NC007	0.948792
								High:High:High:Inf_NC005	0.907794
								High:High:High:Inf_OAT019	0.87872
								High:High:High:Inf_OAT019	0.578968
								High:High:High:Inf_NC005	0.821582
								High:High:High:Inf_NC007	0.62551
								High:High:High:Inf_OAT018	0.774504
								High:High:High:Inf_OAT021	0.712784
								High:High:High:Inf_OAT020	0.791686
								High:High:High:Inf_NC008	0.516629
								High:High:High:Inf_OAT015	0.830035
								High:High:High:Inf_OAT017	0.647641
								High:High:High:Inf_NC002	0.848364
								High:High:High:Inf_NC004	0.671048
								High:High:High:Inf_OAT019	0.682863
								High:High:High:Inf_OAT018	0.868299
								High:High:High:Inf_NC005	0.825974
								High:High:High:Inf_NC007	0.854543
								High:High:High:Inf_OAT015	0.852898
								High:High:High:Inf_NC008	0.688617
								High:High:High:Inf_OAT020	0.851291
								High:High:High:Inf_OAT021	0.784735
								High:High:High:Inf_OAT017	0.668689
								High:High:High:Inf_NC002	0.796258
								High:High:High:Inf_NC004	0.804727
								High:High:High:Inf_OAT021	0.718541
								High:High:High:Inf_OAT020	0.693237
								High:High:High:Inf_NC008	0.53466
								High:High:High:Inf_OAT015	0.739786
								High:High:High:Inf_NC004	0.50243
								High:High:High:Inf_NC002	0.6659
								High:High:High:Inf_OAT017	0.691666
								High:High:High:Inf_OAT019	0.350785
								High:High:High:Inf_NC005	0.69679
								High:High:High:Inf_NC007	0.453002
								High:High:High:Inf_OAT018	0.76387
								High:High:High:Inf_OAT015	0.91435
								High:High:High:Inf_NC008	0.745131
								High:High:High:Inf_OAT020	0.900012
								High:High:High:Inf_OAT021	0.881003
								High:High:High:Inf_NC004	0.8445
								High:High:High:Inf_NC002	0.870771
								High:High:High:Inf_OAT017	0.760643
								High:High:High:Inf_OAT019	0.771378
								High:High:High:Inf_OAT018	0.900981
								High:High:High:Inf_NC005	0.915635
								High:High:High:Inf_NC007	0.986667
								High:High:High:Inf_OAT017	0.902968
								High:High:High:Inf_NC004	0.868056
								High:High:High:Inf_NC002	0.90493
								High:High:High:Inf_NC008	0.908946
								High:High:High:Inf_OAT015	0.923071
								High:High:High:Inf_OAT021	0.862004
								High:High:High:Inf_OAT020	0.917177
								High:High:High:Inf_OAT018	0.951085
								High:High:High:Inf_NC005	0.899371
								High:High:High:Inf_NC007	0.969444
								High:High:High:Inf_OAT019	0.884488
								High:High:High:Inf_NC002	0.83897
								High:High:High:Inf_OAT017	0.807224
								High:High:High:Inf_NC004	0.811284
								High:High:High:Inf_NC008	0.813534
								High:High:High:Inf_OAT015	0.892
								High:High:High:Inf_OAT021	0.886215
								High:High:High:Inf_OAT020	0.895878
								High:High:High:Inf_OAT018	0.888338
								High:High:High:Inf_NC007	0.84359
								High:High:High:Inf_NC005	0.878977
								High:High:High:Inf_OAT019	0.630952
								High:High:High:Inf_OAT020	0.85993
								High:High:High:Inf_OAT021	0.917653
								High:High:High:Inf_OAT015	0.905596
								High:High:High:Inf_NC008	0.820261
								High:High:High:Inf_NC002	0.864171
								High:High:High:Inf_NC004	0.818216
								High:High:High:Inf_OAT017	0.782559
								High:High:High:Inf_OAT019	0.785426
								High:High:High:Inf_NC007	0.854762
								High:High:High:Inf_NC005	0.817646
								High:High:High:Inf_OAT018	0.931358
								High:High:High:Inf_NC005	0.923174
								High:High:High:Inf_NC007	0.938095
								High:High:High:Inf_OAT018	0.92253
								High:High:High:Inf_OAT019	0.898886
								High:High:High:Inf_NC002	0.936162
								High:High:High:Inf_OAT017	0.943595
								High:High:High:Inf_NC004	0.942297
								High:High:High:Inf_OAT020	0.866192
								High:High:High:Inf_OAT021	0.917654
								High:High:High:Inf_OAT015	0.927299
								High:High:High:Inf_NC008	0.908551
								High:High:High:Inf_OAT021	0.847191
								High:High:High:Inf_OAT020	0.872669
								High:High:High:Inf_NC008	0.681153
								High:High:High:Inf_OAT015	0.920551
								High:High:High:Inf_OAT017	0.912911
								High:High:High:Inf_NC004	0.874423
								High:High:High:Inf_NC002	0.795631
								High:High:High:Inf_OAT019	0.797653
								High:High:High:Inf_NC005	0.891786
								High:High:High:Inf_NC007	0.886032
								High:High:High:Inf_OAT018	0.946718
								High:High:High:Inf_NC002	0.871915
								High:High:High:Inf_NC004	0.904615
								High:High:High:Inf_OAT017	0.878927
								High:High:High:Inf_NC008	0.915946
								High:High:High:Inf_OAT015	0.88648
								High:High:High:Inf_OAT021	0.902191
								High:High:High:Inf_OAT020	0.883297
								High:High:High:Inf_OAT018	0.876862
								High:High:High:Inf_NC005	0.886436
								High:High:High:Inf_NC007	0.918797
								High:High:High:Inf_OAT019	0.872065
								High:High:High:Inf_OAT020	0.678772
								High:High:High:Inf_OAT021	0.701576
								High:High:High:Inf_OAT015	0.720316
								High:High:High:Inf_NC008	0.583639
								High:High:High:Inf_NC002	0.659014
								High:High:High:Inf_NC004	0.589895
								High:High:High:Inf_OAT017	0.728807
								High:High:High:Inf_OAT019	0.652541
								High:High:High:Inf_NC007	0.564107
								High:High:High:Inf_NC005	0.570122
								High:High:High:Inf_OAT018	0.791899
								High:High:High:Inf_OAT018	0.891136
								High:High:High:Inf_NC005	0.882815
								High:High:High:Inf_NC007	0.847302
								High:High:High:Inf_OAT019	0.829566
								High:High:High:Inf_OAT017	0.833579
								High:High:High:Inf_NC004	0.822529
								High:High:High:Inf_NC002	0.88539
								High:High:High:Inf_NC008	0.870248
								High:High:High:Inf_OAT015	0.890987
								High:High:High:Inf_OAT021	0.869125
								High:High:High:Inf_OAT020	0.891965
								High:High:High:Inf_NC004	0.895613
								High:High:High:Inf_NC002	0.849361
								High:High:High:Inf_OAT017	0.752402
								High:High:High:Inf_OAT015	0.923626
								High:High:High:Inf_NC008	0.857454
								High:High:High:Inf_OAT020	0.849007
								High:High:High:Inf_OAT021	0.797873
								High:High:High:Inf_OAT018	0.867946
								High:High:High:Inf_NC007	0.829146
								High:High:High:Inf_NC005	0.757055
								High:High:High:Inf_OAT019	0.763096
								High:High:High:Inf_NC004	0.847465
								High:High:High:Inf_OAT017	0.785775
								High:High:High:Inf_NC002	0.834778
								High:High:High:Inf_OAT020	0.882331
								High:High:High:Inf_OAT021	0.899476
								High:High:High:Inf_OAT015	0.85874
								High:High:High:Inf_NC008	0.880781
								High:High:High:Inf_NC005	0.825089
								High:High:High:Inf_NC007	0.854646
								High:High:High:Inf_OAT018	0.912422
								High:High:High:Inf_OAT019	0.839525
								High:High:High:Inf_OAT019	0.645257
								High:High:High:Inf_NC005	0.735611
								High:High:High:Inf_NC007	0.511586
								High:High:High:Inf_OAT018	0.864981
								High:High:High:Inf_OAT021	0.700713
								High:High:High:Inf_OAT020	0.81777
								High:High:High:Inf_NC008	0.321623
								High:High:High:Inf_OAT015	0.859792
								High:High:High:Inf_NC004	0.629686
								High:High:High:Inf_NC002	0.645968
								High:High:High:Inf_OAT017	0.716971
								High:High:High:Inf_OAT019	0.574469
								High:High:High:Inf_NC007	0.57995
								High:High:High:Inf_NC005	0.669286
								High:High:High:Inf_OAT018	0.478065
								High:High:High:Inf_OAT021	0.539637
								High:High:High:Inf_OAT020	0.878125
								High:High:High:Inf_NC008	0.43202
								High:High:High:Inf_OAT015	0.774199
								High:High:High:Inf_NC002	0.866163
								High:High:High:Inf_NC004	0.488148
								High:High:High:Inf_OAT017	0.38832
								High:High:High:Inf_NC007	0.863853
								High:High:High:Inf_NC005	0.803141
								High:High:High:Inf_OAT018	0.93215
								High:High:High:Inf_OAT019	0.902463
								High:High:High:Inf_NC004	0.890689
								High:High:High:Inf_NC002	0.846282
								High:High:High:Inf_OAT017	0.803459
								High:High:High:Inf_OAT020	0.867149
								High:High:High:Inf_OAT021	0.841392
								High:High:High:Inf_OAT015	0.899088
								High:High:High:Inf_NC008	0.825757
								High:High:High:Inf_OAT018	0.8677
								High:High:High:Inf_NC005	0.885167
								High:High:High:Inf_NC007	0.862103
								High:High:High:Inf_OAT019	0.829289
								High:High:High:Inf_NC002	0.865259
								High:High:High:Inf_OAT017	0.846347
								High:High:High:Inf_NC004	0.822961
								High:High:High:Inf_OAT015	0.912248
								High:High:High:Inf_NC008	0.712754
								High:High:High:Inf_OAT020	0.911342
								High:High:High:Inf_OAT021	0.825939
								High:High:High:Inf_NC004	0.649362
								High:High:High:Inf_OAT017	0.672075
								High:High:High:Inf_NC002	0.785894
								High:High:High:Inf_OAT021	0.873076
								High:High:High:Inf_OAT020	0.879043
								High:High:High:Inf_NC008	0.422724
								High:High:High:Inf_OAT015	0.859464
								High:High:High:Inf_NC007	0.900887
								High:High:High:Inf_NC005	0.916658
								High:High:High:Inf_OAT018	0.921719
								High:High:High:Inf_OAT019	0.469831
								High:High:High:Inf_OAT019	0.903232
								High:High:High:Inf_NC007	0.957143
								High:High:High:Inf_NC005	0.885665
								High:High:High:Inf_OAT018	0.935893
								High:High:High:Inf_OAT021	0.884751
								High:High:High:Inf_OAT020	0.880684
								High:High:High:Inf_NC008	0.901658
								High:High:High:Inf_OAT015	0.917665
								High:High:High:Inf_NC004	0.938312
								High:High:High:Inf_NC002	0.946306
								High:High:High:Inf_OAT017	0.810679
								High:High:High:Inf_OAT019	0.911001
								High:High:High:Inf_OAT018	0.916289
								High:High:High:Inf_NC007	0.975
								High:High:High:Inf_NC005	0.884842
								High:High:High:Inf_OAT015	0.940395
								High:High:High:Inf_NC008	0.910738
								High:High:High:Inf_OAT020	0.906731
								High:High:High:Inf_OAT021	0.915589
								High:High:High:Inf_NC002	0.91588
								High:High:High:Inf_NC004	0.910846
								High:High:High:Inf_OAT017	0.892481
								High:High:High:Inf_OAT020	0.765781
								High:High:High:Inf_OAT021	0.834436
								High:High:High:Inf_OAT015	0.912697
								High:High:High:Inf_NC008	0.73863
								High:High:High:Inf_OAT017	0.852117
								High:High:High:Inf_NC002	0.821654
								High:High:High:Inf_NC004	0.735028
								High:High:High:Inf_OAT019	0.669897
								High:High:High:Inf_NC005	0.847726
								High:High:High:Inf_NC007	0.872985
								High:High:High:Inf_OAT018	0.905418
								High:High:High:Inf_OAT019	0.841995
								High:High:High:Inf_NC007	0.971429
								High:High:High:Inf_NC005	0.860704
								High:High:High:Inf_OAT018	0.916598
								High:High:High:Inf_OAT021	0.906076
								High:High:High:Inf_OAT020	0.818006
								High:High:High:Inf_NC008	0.870065
								High:High:High:Inf_OAT015	0.843484
								High:High:High:Inf_OAT017	0.884636
								High:High:High:Inf_NC002	0.904919
								High:High:High:Inf_NC004	0.893735
								High:High:High:Inf_NC005	0.809148
								High:High:High:Inf_NC007	0.900979
								High:High:High:Inf_OAT018	0.856279
								High:High:High:Inf_OAT019	0.75117
								High:High:High:Inf_OAT017	0.868577
								High:High:High:Inf_NC004	0.844918
								High:High:High:Inf_NC002	0.886452
								High:High:High:Inf_OAT021	0.855924
								High:High:High:Inf_OAT020	0.826036
								High:High:High:Inf_NC008	0.822832
								High:High:High:Inf_OAT015	0.849028
								High:High:High:Inf_OAT015	0.937115
								High:High:High:Inf_NC008	0.81381
								High:High:High:Inf_OAT020	0.943651
								High:High:High:Inf_OAT021	0.922399
								High:High:High:Inf_NC004	0.917597
								High:High:High:Inf_NC002	0.948153
								High:High:High:Inf_OAT017	0.793219
								High:High:High:Inf_OAT019	0.895079
								High:High:High:Inf_OAT018	0.930556
								High:High:High:Inf_NC007	0.933333
								High:High:High:Inf_NC005	0.865079
								High:High:High:Inf_NC007	0.943723
								High:High:High:Inf_NC005	0.91789
								High:High:High:Inf_OAT018	0.926913
								High:High:High:Inf_OAT019	0.930386
								High:High:High:Inf_NC002	0.918722
								High:High:High:Inf_NC004	0.863187
								High:High:High:Inf_OAT017	0.903138
								High:High:High:Inf_OAT021	0.935089
								High:High:High:Inf_OAT020	0.95496
								High:High:High:Inf_NC008	0.876321
								High:High:High:Inf_OAT015	0.959361
								High:High:High:Inf_OAT017	0.914167
								High:High:High:Inf_NC002	0.937509
								High:High:High:Inf_NC004	0.939508
								High:High:High:Inf_OAT015	0.899501
								High:High:High:Inf_NC008	0.945144
								High:High:High:Inf_OAT020	0.920513
								High:High:High:Inf_OAT021	0.920033
								High:High:High:Inf_OAT018	0.927258
								High:High:High:Inf_NC007	0.909091
								High:High:High:Inf_NC005	0.920039
								High:High:High:Inf_OAT019	0.935428
								High:High:High:Inf_OAT019	0.795749
								High:High:High:Inf_NC007	0.839394
								High:High:High:Inf_NC005	0.703832
								High:High:High:Inf_OAT018	0.734119
								High:High:High:Inf_OAT021	0.828891
								High:High:High:Inf_OAT020	0.921451
								High:High:High:Inf_NC008	0.72308
								High:High:High:Inf_OAT015	0.920839
								High:High:High:Inf_NC002	0.715056
								High:High:High:Inf_OAT017	0.700784
								High:High:High:Inf_NC004	0.716376
								High:High:High:Inf_OAT015	0.843902
								High:High:High:Inf_NC008	0.550934
								High:High:High:Inf_OAT020	0.880512
								High:High:High:Inf_OAT021	0.773199
								High:High:High:Inf_NC002	0.749664
								High:High:High:Inf_NC004	0.592953
								High:High:High:Inf_OAT017	0.768983
								High:High:High:Inf_OAT019	0.65347
								High:High:High:Inf_OAT018	0.928756
								High:High:High:Inf_NC007	0.829524
								High:High:High:Inf_NC005	0.675326
								High:High:High:Inf_NC002	0.932616
								High:High:High:Inf_NC004	0.888621
								High:High:High:Inf_OAT017	0.911212
								High:High:High:Inf_OAT021	0.929016
								High:High:High:Inf_OAT020	0.947145
								High:High:High:Inf_NC008	0.91661
								High:High:High:Inf_OAT015	0.919109
								High:High:High:Inf_NC005	0.92879
								High:High:High:Inf_NC007	0.94697
								High:High:High:Inf_OAT018	0.891029
								High:High:High:Inf_OAT019	0.904786
								High:High:High:Inf_NC002	0.910097
								High:High:High:Inf_NC004	0.880493
								High:High:High:Inf_OAT017	0.852767
								High:High:High:Inf_NC008	0.890781
								High:High:High:Inf_OAT015	0.836968
								High:High:High:Inf_OAT021	0.904013
								High:High:High:Inf_OAT020	0.847762
								High:High:High:Inf_OAT018	0.855319
								High:High:High:Inf_NC005	0.914225
								High:High:High:Inf_NC007	0.932341
								High:High:High:Inf_OAT019	0.865949
								High:High:High:Inf_NC007	0.953333
								High:High:High:Inf_NC005	0.883224
								High:High:High:Inf_OAT018	0.919961
								High:High:High:Inf_OAT019	0.927616
								High:High:High:Inf_NC002	0.906804
								High:High:High:Inf_NC004	0.905128
								High:High:High:Inf_OAT017	0.917055
								High:High:High:Inf_OAT021	0.907723
								High:High:High:Inf_OAT020	0.946449
								High:High:High:Inf_NC008	0.914426
								High:High:High:Inf_OAT015	0.87739
								High:High:High:Inf_OAT018	0.87227
								High:High:High:Inf_NC007	0.909864
								High:High:High:Inf_NC005	0.90016
								High:High:High:Inf_OAT019	0.901857
								High:High:High:Inf_OAT017	0.891979
								High:High:High:Inf_NC004	0.891298
								High:High:High:Inf_NC002	0.889219
								High:High:High:Inf_OAT015	0.902066
								High:High:High:Inf_NC008	0.88886
								High:High:High:Inf_OAT020	0.861165
								High:High:High:Inf_OAT021	0.91183
								High:High:High:Inf_NC005	0.791646
								High:High:High:Inf_NC007	0.955694
								High:High:High:Inf_OAT018	0.944939
								High:High:High:Inf_OAT019	0.654981
								High:High:High:Inf_OAT017	0.895403
								High:High:High:Inf_NC004	0.896036
								High:High:High:Inf_NC002	0.84671
								High:High:High:Inf_OAT021	0.87696
								High:High:High:Inf_OAT020	0.924761
								High:High:High:Inf_NC008	0.740754
								High:High:High:Inf_OAT015	0.893627
								High:High:High:Inf_OAT018	0.913883
								High:High:High:Inf_NC005	0.910672
								High:High:High:Inf_NC007	0.926667
								High:High:High:Inf_OAT019	0.933008
								High:High:High:Inf_NC002	0.870657
								High:High:High:Inf_NC004	0.904436
								High:High:High:Inf_OAT017	0.927055
								High:High:High:Inf_NC008	0.932556
								High:High:High:Inf_OAT015	0.926075
								High:High:High:Inf_OAT021	0.899762
								High:High:High:Inf_OAT020	0.94182
								High:High:High:Inf_NC007	0.693939
								High:High:High:Inf_NC005	0.697993
								High:High:High:Inf_OAT018	0.872754
								High:High:High:Inf_OAT019	0.294864
								High:High:High:Inf_NC004	0.473163
								High:High:High:Inf_NC002	0.81838
								High:High:High:Inf_OAT017	0.739402
								High:High:High:Inf_OAT021	0.83308
								High:High:High:Inf_OAT020	0.819556
								High:High:High:Inf_NC008	0.595687
								High:High:High:Inf_OAT015	0.930696
								High:High:High:Inf_NC002	0.751582
								High:High:High:Inf_NC004	0.812181
								High:High:High:Inf_OAT017	0.759678
								High:High:High:Inf_OAT021	0.790634
								High:High:High:Inf_OAT020	0.820687
								High:High:High:Inf_NC008	0.812259
								High:High:High:Inf_OAT015	0.851136
								High:High:High:Inf_NC007	0.791753
								High:High:High:Inf_NC005	0.749434
								High:High:High:Inf_OAT018	0.823389
								High:High:High:Inf_OAT019	0.764999
								High:High:High:Inf_OAT015	0.886104
								High:High:High:Inf_NC008	0.822041
								High:High:High:Inf_OAT020	0.862064
								High:High:High:Inf_OAT021	0.862431
								High:High:High:Inf_NC002	0.855298
								High:High:High:Inf_NC004	0.853173
								High:High:High:Inf_OAT017	0.808321
								High:High:High:Inf_OAT019	0.889407
								High:High:High:Inf_OAT018	0.902112
								High:High:High:Inf_NC007	0.849802
								High:High:High:Inf_NC005	0.830056
								High:High:High:Inf_NC008	0.789334
								High:High:High:Inf_OAT015	0.914807
								High:High:High:Inf_OAT021	0.686471
								High:High:High:Inf_OAT020	0.852992
								High:High:High:Inf_NC004	0.535941
								High:High:High:Inf_NC002	0.876144
								High:High:High:Inf_OAT017	0.691587
								High:High:High:Inf_OAT019	0.357066
								High:High:High:Inf_OAT018	0.88783
								High:High:High:Inf_NC005	0.86804
								High:High:High:Inf_NC007	0.789087

## Sheet: Sheet5
Figure6-figure supplement 1-source data 2: Raw. Violin plots showing various physiological conditions in high or low methylated sperm donors.
Factor	Value	Group
FSH	2.4	Low
FSH	11.4	Low
FSH	11.5	Low
FSH	3.9	Low
FSH	1.5	Low
FSH	1.9	Low
FSH	7.7	Low
FSH	1.1	High
FSH	2.8	High
FSH	6.1	High
FSH	12.7	High
LH	1.8	Low
LH	6.6	Low
LH	3.4	Low
LH	2.8	Low
LH	1.9	Low
LH	2.1	Low
LH	4.1	Low
LH	2.3	High
LH	2.8	High
LH	2.6	High
LH	5.1	High
Total testosterone	18.2	Low
Total testosterone	25.8	Low
Total testosterone	23.2	Low
Total testosterone	14.9	Low
Total testosterone	21.6	Low
Total testosterone	17.6	Low
Total testosterone	17.7	Low
Total testosterone	17.1	High
Total testosterone	16.7	High
Total testosterone	11.8	High
Total testosterone	11.4	High
SHBG	34	Low
SHBG	36	Low
SHBG	53	Low
SHBG	29	Low
SHBG	29	Low
SHBG	29	Low
SHBG	25	Low
SHBG	38	High
SHBG	32	High
SHBG	31	High
SHBG	23	High
Free testosteron	382	Low
Free testosteron	560	Low
Free testosteron	377	Low
Free testosteron	333	Low
Free testosteron	512	Low
Free testosteron	403	Low
Free testosteron	433	Low
Free testosteron	332	High
Free testosteron	359	High
Free testosteron	247	High
Free testosteron	278	High
Prolactin	167	Low
Prolactin	52	Low
Prolactin	181	Low
Prolactin	128	Low
Prolactin	172	Low
Prolactin	124	Low
Prolactin	351	Low
Prolactin	89	High
Prolactin	166	High
Prolactin	126	High
Prolactin	274	High
Age	25	Low
Age	35	Low
Age	38	Low
Age	35	Low
Age	35	Low
Age	34	Low
Age	44	Low
Age	36	High
Age	31	High
Age	53	High
Age	35	High
