# Supplementary material for: Potential role of KRAB-ZFP binding and transcriptional states on DNA methylation of retroelements in human male germ cells
Source: eLife. 2022 Mar 22;11:e76822. doi: 10.7554/eLife.76822 (PMC8967385; doi:10.7554/eLife.76822)
Supplement: Supplementary file 1. [file elife-76822-supp1.xlsx]

## Sheet: Table S1
Supplementary File 1	List of Full-length L1/SVA/LTR12
chr1	start	end	repeat
chr1	10485712	10486981	LTR12C:LTR:ERV1:-
chr1	106954441	106955960	SVA_D:Other:Other:+
chr1	223340994	223346983	L1PA3:LINE:L1:+
chr1	65927685	65933855	L1PA6:LINE:L1:-
chr1	91356742	91358137	SVA_D:Other:Other:-
chr1	109182514	109184050	LTR12C:LTR:ERV1:-
chr1	114030826	114037137	L1PA13:LINE:L1:+
chr1	143125606	143131754	L1PA2:LINE:L1:-
chr1	143520651	143526788	L1PA4:LINE:L1:-
chr1	146535457	146541610	L1PA4:LINE:L1:+
chr1	158855893	158861904	L1PA2:LINE:L1:+
chr1	177728538	177734680	L1PA3:LINE:L1:+
chr1	181925252	181931493	L1PA7:LINE:L1:-
chr1	183627202	183633358	L1PA3:LINE:L1:+
chr1	185856425	185862466	L1PA2:LINE:L1:-
chr1	186514430	186520572	L1PA6:LINE:L1:-
chr1	211155634	211161773	L1PA4:LINE:L1:-
chr1	215871171	215877611	L1PA7:LINE:L1:-
chr1	216658987	216664956	L1PA2:LINE:L1:+
chr1	233957715	233964133	L1PA7:LINE:L1:+
chr1	237238564	237244593	L1HS:LINE:L1:+
chr1	248118266	248124389	L1PA4:LINE:L1:-
chr1	371979	378401	L1PA7:LINE:L1:-
chr1	611291	617713	L1PA7:LINE:L1:+
chr1	952549	954256	LTR12C:LTR:ERV1:-
chr1	1041993	1043425	LTR12C:LTR:ERV1:+
chr1	2729663	2731052	LTR12C:LTR:ERV1:+
chr1	6364453	6366296	SVA_D:Other:Other:-
chr1	6455134	6456353	LTR12E:LTR:ERV1:-
chr1	6774578	6776390	SVA_D:Other:Other:-
chr1	7471817	7477982	L1PA4:LINE:L1:-
chr1	7660545	7662062	SVA_D:Other:Other:-
chr1	8213119	8213872	LTR12:LTR:ERV1:-
chr1	8958366	8959173	LTR12:LTR:ERV1:+
chr1	10088443	10089824	SVA_D:Other:Other:+
chr1	11365136	11366669	SVA_C:Other:Other:-
chr1	11668625	11669977	LTR12C:LTR:ERV1:+
chr1	12067823	12069304	SVA_C:Other:Other:-
chr1	12962192	12963495	SVA_D:Other:Other:+
chr1	13403712	13405037	SVA_D:Other:Other:-
chr1	13538515	13540017	LTR12C:LTR:ERV1:-
chr1	13544708	13546006	LTR12C:LTR:ERV1:+
chr1	13624509	13625834	SVA_D:Other:Other:-
chr1	13720736	13722139	SVA_D:Other:Other:-
chr1	13759374	13760876	LTR12C:LTR:ERV1:-
chr1	13765567	13766865	LTR12C:LTR:ERV1:+
chr1	13983865	13985572	SVA_D:Other:Other:+
chr1	14308736	14310222	LTR12C:LTR:ERV1:-
chr1	14681895	14688335	L1PA7:LINE:L1:-
chr1	14708814	14714837	L1PA3:LINE:L1:-
chr1	14746023	14747581	LTR12C:LTR:ERV1:-
chr1	20310193	20311509	LTR12C:LTR:ERV1:-
chr1	21349732	21351405	SVA_F:Other:Other:+
chr1	21379036	21380979	SVA_D:Other:Other:+
chr1	21828529	21830003	SVA_C:Other:Other:-
chr1	23583263	23584911	SVA_D:Other:Other:+
chr1	23829728	23831478	SVA_D:Other:Other:+
chr1	24014644	24016257	SVA_D:Other:Other:+
chr1	24178934	24180547	SVA_D:Other:Other:+
chr1	24261448	24262987	SVA_D:Other:Other:+
chr1	24357915	24359387	SVA_D:Other:Other:-
chr1	24816323	24817554	LTR12E:LTR:ERV1:+
chr1	25023609	25024387	LTR12:LTR:ERV1:-
chr1	25047834	25049237	LTR12C:LTR:ERV1:+
chr1	25833076	25839210	L1PA2:LINE:L1:+
chr1	25929720	25931433	SVA_D:Other:Other:+
chr1	26921935	26924007	SVA_D:Other:Other:+
chr1	27129382	27131339	SVA_D:Other:Other:-
chr1	27614841	27616533	SVA_D:Other:Other:-
chr1	29456756	29458154	LTR12C:LTR:ERV1:-
chr1	30911338	30916972	L1PA2:LINE:L1:+
chr1	30926428	30932569	L1PA5:LINE:L1:-
chr1	30966236	30972403	L1PA4:LINE:L1:+
chr1	31648616	31650508	SVA_D:Other:Other:+
chr1	33269339	33270876	SVA_B:Other:Other:-
chr1	33774368	33775959	SVA_B:Other:Other:-
chr1	33974245	33975740	SVA_D:Other:Other:-
chr1	34137597	34143718	L1PA4:LINE:L1:+
chr1	34295121	34301266	L1PA3:LINE:L1:+
chr1	34546996	34548688	SVA_B:Other:Other:+
chr1	34557995	34564014	L1PA3:LINE:L1:+
chr1	34716342	34722368	L1PA3:LINE:L1:+
chr1	34771317	34777639	L1PA16:LINE:L1:+
chr1	35031675	35037706	L1HS:LINE:L1:-
chr1	36662383	36663469	LTR12C:LTR:ERV1:+
chr1	37545338	37547744	SVA_D:Other:Other:+
chr1	37840624	37846804	L1PA6:LINE:L1:-
chr1	37983669	37985160	LTR12C:LTR:ERV1:+
chr1	39094828	39101017	L1PA6:LINE:L1:-
chr1	39112439	39114000	SVA_D:Other:Other:+
chr1	39699458	39701100	SVA_F:Other:Other:-
chr1	40069415	40069890	LTR12F:LTR:ERV1:+
chr1	40273317	40274626	SVA_B:Other:Other:+
chr1	40334740	40336198	SVA_B:Other:Other:+
chr1	40378172	40379737	SVA_D:Other:Other:-
chr1	40464693	40466308	SVA_F:Other:Other:+
chr1	40853343	40854827	LTR12C:LTR:ERV1:+
chr1	41023108	41025007	LTR12C:LTR:ERV1:-
chr1	41641936	41648034	L1PA4:LINE:L1:+
chr1	42524946	42531043	L1PA4:LINE:L1:+
chr1	43381779	43383215	LTR12C:LTR:ERV1:-
chr1	43572015	43573748	LTR12C:LTR:ERV1:-
chr1	43580198	43586187	L1PA2:LINE:L1:-
chr1	43966926	43968647	SVA_D:Other:Other:+
chr1	45341422	45342884	SVA_D:Other:Other:+
chr1	45546938	45548015	SVA_D:Other:Other:+
chr1	45580318	45581813	SVA_B:Other:Other:-
chr1	45628026	45634154	L1PA5:LINE:L1:+
chr1	45750237	45756383	L1PA4:LINE:L1:+
chr1	46189628	46191758	SVA_E:Other:Other:+
chr1	47243158	47244742	LTR12C:LTR:ERV1:-
chr1	47290810	47296984	L1PA5:LINE:L1:-
chr1	47385364	47391525	L1PA7:LINE:L1:-
chr1	47441645	47447815	L1PA6:LINE:L1:+
chr1	47472118	47478240	L1PA5:LINE:L1:+
chr1	47631596	47637733	L1PA4:LINE:L1:+
chr1	48421912	48428047	L1PA5:LINE:L1:+
chr1	48615797	48621829	L1PA2:LINE:L1:+
chr1	48633624	48639348	L1PA7:LINE:L1:-
chr1	48742866	48749015	L1PA3:LINE:L1:+
chr1	48777260	48783361	L1PA4:LINE:L1:+
chr1	48829475	48835601	L1PA3:LINE:L1:-
chr1	48944380	48945924	SVA_D:Other:Other:+
chr1	49471684	49477716	L1PA3:LINE:L1:+
chr1	49533908	49540195	L1PA6:LINE:L1:-
chr1	49551174	49557869	L1PA15:LINE:L1:+
chr1	49581897	49588020	L1PA6:LINE:L1:-
chr1	49748179	49754048	L1PA2:LINE:L1:+
chr1	49893123	49893814	LTR12:LTR:ERV1:-
chr1	50006829	50008224	LTR12C:LTR:ERV1:+
chr1	50020318	50021160	LTR12D:LTR:ERV1:-
chr1	50026985	50033119	L1PA4:LINE:L1:-
chr1	50186630	50187123	LTR12F:LTR:ERV1:+
chr1	50203518	50209736	L1PA4:LINE:L1:+
chr1	50340840	50346847	L1PA2:LINE:L1:-
chr1	50380780	50386928	L1PA5:LINE:L1:+
chr1	50400513	50406536	L1PA3:LINE:L1:+
chr1	50846650	50848247	SVA_D:Other:Other:+
chr1	51182110	51182838	LTR12:LTR:ERV1:+
chr1	51352054	51358165	L1PA5:LINE:L1:-
chr1	51370558	51376681	L1PA5:LINE:L1:-
chr1	51417756	51419072	SVA_B:Other:Other:+
chr1	52312121	52313603	LTR12C:LTR:ERV1:-
chr1	52636672	52642813	L1PA3:LINE:L1:-
chr1	52646719	52648436	SVA_D:Other:Other:+
chr1	53334917	53336580	SVA_D:Other:Other:-
chr1	53470334	53476454	L1PA5:LINE:L1:+
chr1	54468889	54470460	LTR12C:LTR:ERV1:-
chr1	54698259	54700037	SVA_F:Other:Other:+
chr1	55895929	55902497	L1PA7:LINE:L1:+
chr1	56027503	56033642	L1PA4:LINE:L1:-
chr1	57808256	57809644	LTR12C:LTR:ERV1:-
chr1	58028985	58034648	L1PA5:LINE:L1:+
chr1	58592127	58598157	L1PA2:LINE:L1:-
chr1	58632831	58633668	LTR12:LTR:ERV1:+
chr1	58640273	58641150	LTR12:LTR:ERV1:+
chr1	58734685	58740704	L1PA2:LINE:L1:-
chr1	58838843	58844878	L1PA2:LINE:L1:-
chr1	59088920	59090506	LTR12C:LTR:ERV1:+
chr1	59423800	59429955	L1PA5:LINE:L1:+
chr1	59716495	59722634	L1PA4:LINE:L1:+
chr1	59834595	59840750	L1PA3:LINE:L1:+
chr1	59937619	59939164	LTR12C:LTR:ERV1:+
chr1	60052475	60058617	L1PA3:LINE:L1:+
chr1	60076208	60082314	L1PA4:LINE:L1:+
chr1	60113419	60119451	L1PA2:LINE:L1:-
chr1	60434473	60435901	LTR12C:LTR:ERV1:-
chr1	60955804	60961821	L1PA3:LINE:L1:+
chr1	61105684	61111709	L1PA2:LINE:L1:+
chr1	61238212	61244347	L1PA5:LINE:L1:-
chr1	62408812	62414896	L1PA5:LINE:L1:+
chr1	63135377	63136926	LTR12C:LTR:ERV1:+
chr1	63165076	63171069	L1PA4:LINE:L1:-
chr1	63218927	63220495	LTR12C:LTR:ERV1:+
chr1	63227010	63228332	LTR12C:LTR:ERV1:+
chr1	64666168	64667951	SVA_E:Other:Other:+
chr1	64717154	64723477	L1PA11:LINE:L1:+
chr1	64739109	64745269	L1PA3:LINE:L1:+
chr1	65915962	65921992	L1PA3:LINE:L1:-
chr1	66010470	66016653	L1PA3:LINE:L1:-
chr1	66024232	66030259	L1PA2:LINE:L1:-
chr1	66117365	66123766	L1PA7:LINE:L1:+
chr1	66650526	66656669	L1PA4:LINE:L1:-
chr1	66882669	66883221	LTR12F:LTR:ERV1:-
chr1	66946606	66952635	L1PA3:LINE:L1:+
chr1	67245825	67252009	L1PA4:LINE:L1:+
chr1	67544543	67550598	L1HS:LINE:L1:-
chr1	67642321	67648459	L1PA4:LINE:L1:-
chr1	68468809	68474906	L1PA6:LINE:L1:-
chr1	68553278	68559388	L1PA6:LINE:L1:-
chr1	69147169	69153319	L1PA4:LINE:L1:-
chr1	69202376	69205819	L1HS:LINE:L1:-
chr1	69283218	69284650	LTR12C:LTR:ERV1:+
chr1	69341460	69347488	L1PA2:LINE:L1:-
chr1	69389169	69395194	L1PA2:LINE:L1:+
chr1	69562211	69568351	L1PA5:LINE:L1:-
chr1	69582742	69586194	L1PA2:LINE:L1:-
chr1	69855132	69861277	L1PA5:LINE:L1:-
chr1	70348296	70354326	L1PA2:LINE:L1:-
chr1	70370957	70377031	L1PA4:LINE:L1:-
chr1	70388496	70394635	L1PA3:LINE:L1:-
chr1	71060816	71066961	L1PA3:LINE:L1:-
chr1	71188432	71194319	L1PA11:LINE:L1:-
chr1	71979381	71985425	L1HS:LINE:L1:+
chr1	72353886	72359918	L1PA2:LINE:L1:+
chr1	73296129	73302108	L1PA7:LINE:L1:+
chr1	73719791	73720392	LTR12_:LTR:ERV1:+
chr1	73951984	73957975	L1PA6:LINE:L1:-
chr1	74712735	74714149	LTR12C:LTR:ERV1:-
chr1	74718170	74719596	LTR12C:LTR:ERV1:-
chr1	74812691	74818785	L1PA4:LINE:L1:-
chr1	74930790	74931931	LTR12E:LTR:ERV1:+
chr1	75205716	75206601	LTR12:LTR:ERV1:-
chr1	75210578	75211328	LTR12:LTR:ERV1:-
chr1	75342804	75348826	L1PA3:LINE:L1:+
chr1	75389234	75395787	L1PA11:LINE:L1:+
chr1	75416908	75418296	LTR12C:LTR:ERV1:-
chr1	75452202	75458308	L1PA4:LINE:L1:+
chr1	75572550	75578572	L1PA3:LINE:L1:-
chr1	75641358	75647517	L1PA6:LINE:L1:-
chr1	75723433	75729829	L1PA7:LINE:L1:+
chr1	75868071	75874547	L1PA7:LINE:L1:+
chr1	75941946	75948115	L1PA3:LINE:L1:+
chr1	76143435	76149470	L1PA3:LINE:L1:+
chr1	76163324	76169359	L1PA4:LINE:L1:+
chr1	76224191	76224895	LTR12:LTR:ERV1:+
chr1	76243276	76249427	L1PA4:LINE:L1:+
chr1	76294516	76300619	L1PA5:LINE:L1:+
chr1	76321974	76328103	L1PA7:LINE:L1:-
chr1	76577138	76579055	SVA_D:Other:Other:-
chr1	77446706	77452864	L1PA6:LINE:L1:+
chr1	77465171	77471200	L1PA2:LINE:L1:-
chr1	77962352	77963210	LTR12:LTR:ERV1:+
chr1	78334617	78336825	SVA_E:Other:Other:-
chr1	78668792	78675255	L1PA7:LINE:L1:+
chr1	78775743	78781841	L1PA6:LINE:L1:+
chr1	79073384	79079415	L1PA6:LINE:L1:+
chr1	79311129	79317159	L1PA2:LINE:L1:-
chr1	79578396	79578820	LTR12F:LTR:ERV1:+
chr1	79879873	79885986	L1PA5:LINE:L1:+
chr1	79976959	79982965	L1PA3:LINE:L1:-
chr1	80026244	80027766	LTR12C:LTR:ERV1:-
chr1	80059324	80060165	LTR12:LTR:ERV1:+
chr1	80088374	80089290	LTR12:LTR:ERV1:+
chr1	80354296	80360416	L1PA3:LINE:L1:-
chr1	80404094	80410104	L1PA2:LINE:L1:-
chr1	80518288	80519717	LTR12C:LTR:ERV1:-
chr1	80598233	80604262	L1PA3:LINE:L1:-
chr1	80860033	80866179	L1PA3:LINE:L1:-
chr1	81049162	81050048	LTR12:LTR:ERV1:+
chr1	81249250	81255348	L1PA7:LINE:L1:+
chr1	81404888	81410942	L1HS:LINE:L1:-
chr1	81643468	81644862	LTR12C:LTR:ERV1:-
chr1	82080787	82081338	LTR12_:LTR:ERV1:+
chr1	82596613	82602574	L1PA3:LINE:L1:-
chr1	82715728	82721753	L1PA2:LINE:L1:+
chr1	83241602	83243030	LTR12C:LTR:ERV1:-
chr1	83350020	83350631	LTR12:LTR:ERV1:-
chr1	83633103	83639264	L1PA4:LINE:L1:+
chr1	83647857	83653884	L1PA2:LINE:L1:+
chr1	83729290	83735314	L1PA3:LINE:L1:+
chr1	83816096	83822148	L1PA2:LINE:L1:-
chr1	84518059	84524089	L1HS:LINE:L1:-
chr1	84694613	84700623	L1PA3:LINE:L1:-
chr1	84908451	84914923	L1PA7:LINE:L1:+
chr1	85368365	85369130	LTR12:LTR:ERV1:+
chr1	85974034	85980225	L1PA6:LINE:L1:+
chr1	86107549	86113704	L1PA3:LINE:L1:+
chr1	86214202	86220231	L1HS:LINE:L1:+
chr1	86290623	86296627	L1PA3:LINE:L1:-
chr1	86392750	86398783	L1HS:LINE:L1:+
chr1	86537503	86543675	L1PA7:LINE:L1:+
chr1	86576068	86577737	LTR12C:LTR:ERV1:+
chr1	86628043	86634172	L1PA5:LINE:L1:-
chr1	86988811	86990052	LTR12C:LTR:ERV1:-
chr1	87123125	87129294	L1PA6:LINE:L1:+
chr1	87144763	87150794	L1HS:LINE:L1:-
chr1	87364469	87366320	SVA_D:Other:Other:-
chr1	87428838	87430348	SVA_C:Other:Other:-
chr1	87896562	87897140	LTR12_:LTR:ERV1:+
chr1	87994149	87995179	LTR12D:LTR:ERV1:-
chr1	88101002	88102474	LTR12C:LTR:ERV1:-
chr1	88807525	88813550	L1PA2:LINE:L1:+
chr1	89178459	89184137	L1PA6:LINE:L1:-
chr1	89494216	89500000	L1PA6:LINE:L1:-
chr1	89537286	89543671	L1PA8:LINE:L1:+
chr1	89592701	89594292	LTR12C:LTR:ERV1:-
chr1	89620500	89626051	L1PA5:LINE:L1:+
chr1	89684336	89685039	LTR12:LTR:ERV1:-
chr1	89738135	89739573	LTR12C:LTR:ERV1:-
chr1	89767572	89769016	LTR12C:LTR:ERV1:-
chr1	89878138	89884174	L1PA2:LINE:L1:-
chr1	89938219	89945018	L1PA11:LINE:L1:+
chr1	89956547	89962695	L1PA3:LINE:L1:+
chr1	90212585	90218612	L1PA2:LINE:L1:-
chr1	90449445	90450742	LTR12C:LTR:ERV1:-
chr1	90522838	90528870	L1PA3:LINE:L1:-
chr1	90632403	90638545	L1PA5:LINE:L1:+
chr1	91463127	91469253	L1PA5:LINE:L1:+
chr1	91648251	91654640	L1PA7:LINE:L1:-
chr1	91753935	91755406	SVA_B:Other:Other:-
chr1	91762363	91768512	L1PA4:LINE:L1:+
chr1	91832194	91838304	L1PA4:LINE:L1:+
chr1	91887926	91894451	L1PA8:LINE:L1:-
chr1	92490912	92492465	SVA_B:Other:Other:-
chr1	92697673	92703219	L1PA3:LINE:L1:-
chr1	92745042	92751181	L1PA6:LINE:L1:+
chr1	92853959	92860042	L1PA7:LINE:L1:+
chr1	92896321	92902445	L1PA5:LINE:L1:-
chr1	93095223	93101354	L1PA4:LINE:L1:-
chr1	93181045	93187235	L1PA6:LINE:L1:+
chr1	93357080	93363223	L1PA4:LINE:L1:+
chr1	93635650	93636972	LTR12C:LTR:ERV1:+
chr1	93867514	93873655	L1PA4:LINE:L1:-
chr1	94256208	94262237	L1PA2:LINE:L1:-
chr1	94321288	94327428	L1PA4:LINE:L1:+
chr1	94376292	94382332	L1PA6:LINE:L1:-
chr1	94599675	94605813	L1PA4:LINE:L1:+
chr1	94829815	94835966	L1PA6:LINE:L1:-
chr1	95556763	95558356	LTR12C:LTR:ERV1:+
chr1	95624047	95630183	L1PA5:LINE:L1:-
chr1	95676245	95682546	L1PA6:LINE:L1:-
chr1	95757793	95763814	L1PA3:LINE:L1:-
chr1	96003556	96004231	LTR12:LTR:ERV1:-
chr1	96128918	96129662	LTR12:LTR:ERV1:-
chr1	96134330	96135748	LTR12C:LTR:ERV1:-
chr1	96434501	96440924	L1PA8:LINE:L1:-
chr1	96517135	96523289	L1PA3:LINE:L1:-
chr1	96613226	96613955	LTR12:LTR:ERV1:+
chr1	96688935	96690462	LTR12C:LTR:ERV1:-
chr1	96748825	96755474	L1PA13:LINE:L1:-
chr1	96841376	96847817	L1PA3:LINE:L1:+
chr1	96898995	96905147	L1PA5:LINE:L1:-
chr1	96934652	96936203	SVA_D:Other:Other:-
chr1	97069942	97075956	L1PA2:LINE:L1:+
chr1	97081585	97083550	L1PA6:LINE:L1:-
chr1	97116814	97122966	L1PA4:LINE:L1:+
chr1	97227294	97229186	SVA_D:Other:Other:-
chr1	97318751	97324918	L1PA3:LINE:L1:-
chr1	97562039	97562546	LTR12F:LTR:ERV1:+
chr1	97823393	97829515	L1PA6:LINE:L1:+
chr1	98966420	98967067	LTR12:LTR:ERV1:-
chr1	98977339	98979223	SVA_D:Other:Other:-
chr1	99341194	99347290	L1PA6:LINE:L1:-
chr1	99543518	99544985	SVA_C:Other:Other:-
chr1	99624755	99628254	L1PA7:LINE:L1:-
chr1	99865380	99871529	L1PA3:LINE:L1:-
chr1	99973119	99975021	SVA_B:Other:Other:+
chr1	100288477	100289983	SVA_D:Other:Other:+
chr1	100322017	100323420	SVA_C:Other:Other:-
chr1	100665158	100671644	L1PA7:LINE:L1:+
chr1	101063794	101069940	L1PA5:LINE:L1:-
chr1	101097794	101103946	L1PA3:LINE:L1:-
chr1	101128537	101134676	L1PA4:LINE:L1:-
chr1	101142482	101148046	L1PA3:LINE:L1:-
chr1	101178224	101179023	LTR12:LTR:ERV1:+
chr1	101285517	101291767	L1PA7:LINE:L1:+
chr1	101305263	101311655	L1PA7:LINE:L1:-
chr1	101410239	101415671	L1PA6:LINE:L1:-
chr1	101964536	101964991	LTR12F:LTR:ERV1:+
chr1	102523548	102530155	L1PA11:LINE:L1:+
chr1	102699500	102700886	LTR12C:LTR:ERV1:-
chr1	102907639	102913785	L1PA4:LINE:L1:+
chr1	103076075	103076785	LTR12_:LTR:ERV1:+
chr1	103124543	103126133	LTR12C:LTR:ERV1:-
chr1	103209416	103210167	LTR12:LTR:ERV1:-
chr1	103292051	103298210	L1PA5:LINE:L1:+
chr1	103319159	103320608	LTR12C:LTR:ERV1:+
chr1	103393658	103399669	L1PA2:LINE:L1:-
chr1	103511176	103517306	L1PA4:LINE:L1:-
chr1	103919838	103925962	L1PA4:LINE:L1:+
chr1	104714783	104716208	LTR12C:LTR:ERV1:+
chr1	104758964	104760632	LTR12C:LTR:ERV1:-
chr1	104950049	104951264	LTR12D:LTR:ERV1:-
chr1	105201475	105207494	L1PA3:LINE:L1:-
chr1	105312869	105318900	L1HS:LINE:L1:-
chr1	105386455	105392486	L1HS:LINE:L1:-
chr1	105477770	105483802	L1PA3:LINE:L1:-
chr1	105640178	105640868	LTR12_:LTR:ERV1:-
chr1	106172758	106174422	LTR12C:LTR:ERV1:-
chr1	106338371	106339388	LTR12D:LTR:ERV1:+
chr1	106421465	106427360	L1PA7:LINE:L1:-
chr1	106500587	106501237	LTR12B:LTR:ERV1:-
chr1	106872046	106878159	L1PA5:LINE:L1:+
chr1	107395577	107401984	L1PA7:LINE:L1:+
chr1	107587193	107588793	LTR12C:LTR:ERV1:+
chr1	108274862	108280998	L1PA6:LINE:L1:+
chr1	108702086	108703621	SVA_D:Other:Other:-
chr1	108704418	108710431	L1PA3:LINE:L1:-
chr1	108746052	108752524	L1PA7:LINE:L1:-
chr1	108900942	108907039	L1PA5:LINE:L1:-
chr1	109078097	109079480	SVA_D:Other:Other:-
chr1	109084965	109090646	L1PA6:LINE:L1:+
chr1	109209915	109211344	LTR12C:LTR:ERV1:+
chr1	109217720	109219319	SVA_F:Other:Other:+
chr1	109595264	109596821	SVA_B:Other:Other:+
chr1	109616013	109617217	SVA_B:Other:Other:+
chr1	110003788	110004390	LTR12_:LTR:ERV1:-
chr1	110212261	110212979	LTR12_:LTR:ERV1:-
chr1	110285402	110291563	L1PA4:LINE:L1:-
chr1	110938040	110939526	LTR12C:LTR:ERV1:-
chr1	111616153	111622277	L1PA5:LINE:L1:-
chr1	111838153	111844039	L1PA6:LINE:L1:+
chr1	111877833	111883993	L1PA3:LINE:L1:+
chr1	111936383	111942517	L1PA6:LINE:L1:+
chr1	112149660	112151498	SVA_D:Other:Other:-
chr1	112697421	112703432	L1PA2:LINE:L1:-
chr1	112741764	112747925	L1PA3:LINE:L1:-
chr1	112754290	112760427	L1PA5:LINE:L1:+
chr1	112764040	112770058	L1PA2:LINE:L1:+
chr1	113270956	113272032	SVA_A:Other:Other:+
chr1	113396310	113397706	LTR12C:LTR:ERV1:-
chr1	113437147	113438578	LTR12C:LTR:ERV1:+
chr1	113605576	113607040	SVA_C:Other:Other:-
chr1	114015884	114022004	L1PA6:LINE:L1:-
chr1	114039842	114045879	L1HS:LINE:L1:+
chr1	114176182	114182002	L1PA3:LINE:L1:-
chr1	114784472	114786364	SVA_A:Other:Other:+
chr1	114846613	114852742	L1PA3:LINE:L1:+
chr1	115332581	115334137	SVA_D:Other:Other:-
chr1	115346450	115347999	SVA_C:Other:Other:-
chr1	115475057	115481180	L1PA5:LINE:L1:+
chr1	115690442	115696580	L1PA2:LINE:L1:+
chr1	115925965	115932096	L1PA6:LINE:L1:-
chr1	116176101	116182550	L1PA7:LINE:L1:-
chr1	116594534	116600673	L1PA3:LINE:L1:+
chr1	116688191	116689742	LTR12C:LTR:ERV1:-
chr1	116839822	116841165	LTR12C:LTR:ERV1:-
chr1	117517360	117523487	L1PA5:LINE:L1:+
chr1	117760217	117766387	L1PA4:LINE:L1:+
chr1	117880201	117880736	LTR12B:LTR:ERV1:+
chr1	117895184	117901346	L1PA3:LINE:L1:-
chr1	118263295	118269455	L1PA4:LINE:L1:+
chr1	118306608	118312721	L1PA6:LINE:L1:-
chr1	118541459	118547567	L1PA6:LINE:L1:-
chr1	118768174	118768706	LTR12F:LTR:ERV1:+
chr1	118775495	118776056	LTR12F:LTR:ERV1:+
chr1	118823510	118829528	L1PA2:LINE:L1:+
chr1	119054409	119060545	L1PA6:LINE:L1:-
chr1	119110855	119116873	L1PA3:LINE:L1:-
chr1	119180376	119186538	L1PA4:LINE:L1:+
chr1	119374061	119380203	L1PA3:LINE:L1:+
chr1	119394974	119401003	L1HS:LINE:L1:+
chr1	119563254	119569271	L1PA3:LINE:L1:+
chr1	119713986	119715334	LTR12C:LTR:ERV1:+
chr1	119721507	119723014	LTR12C:LTR:ERV1:+
chr1	120040270	120046426	L1PA4:LINE:L1:+
chr1	121143307	121149329	L1PA3:LINE:L1:+
chr1	121218922	121225075	L1PA5:LINE:L1:+
chr1	121274032	121280059	L1HS:LINE:L1:-
chr1	121316087	121322219	L1PA3:LINE:L1:+
chr1	121322984	121329402	L1PA7:LINE:L1:-
chr1	121340004	121346117	L1PA4:LINE:L1:-
chr1	142559788	142565914	L1PA4:LINE:L1:+
chr1	142626735	142632866	L1PA3:LINE:L1:-
chr1	142876162	142882314	L1PA2:LINE:L1:+
chr1	142944088	142950217	L1PA4:LINE:L1:-
chr1	143542208	143543631	SVA_D:Other:Other:+
chr1	144016769	144018639	LTR12C:LTR:ERV1:-
chr1	144843305	144849427	L1PA6:LINE:L1:+
chr1	145047814	145053955	L1PA5:LINE:L1:+
chr1	145667058	145669064	SVA_D:Other:Other:+
chr1	145669623	145671178	SVA_C:Other:Other:-
chr1	146478079	146484231	L1PA5:LINE:L1:+
chr1	146532859	146534323	SVA_B:Other:Other:+
chr1	146704073	146705757	SVA_D:Other:Other:+
chr1	146793521	146799541	L1PA3:LINE:L1:-
chr1	146814747	146820865	L1PA5:LINE:L1:+
chr1	146874114	146880259	L1PA4:LINE:L1:+
chr1	146894945	146900972	L1PA2:LINE:L1:+
chr1	146934492	146941668	L1PA14:LINE:L1:-
chr1	146989265	146989967	LTR12_:LTR:ERV1:-
chr1	147151968	147153457	LTR12C:LTR:ERV1:-
chr1	147333764	147339894	L1PA6:LINE:L1:+
chr1	147420873	147423219	SVA_D:Other:Other:-
chr1	149052759	149058793	L1PA2:LINE:L1:-
chr1	149069575	149070997	LTR12C:LTR:ERV1:+
chr1	149071926	149078092	L1PA6:LINE:L1:-
chr1	149196673	149198801	SVA_D:Other:Other:+
chr1	149923964	149930070	L1PA5:LINE:L1:-
chr1	150700420	150702477	SVA_F:Other:Other:-
chr1	150753325	150755021	SVA_F:Other:Other:+
chr1	150822718	150824352	SVA_C:Other:Other:+
chr1	150872300	150872989	LTR12_:LTR:ERV1:+
chr1	151572085	151574213	SVA_E:Other:Other:+
chr1	151623071	151624660	SVA_F:Other:Other:-
chr1	151741142	151742610	SVA_C:Other:Other:-
chr1	151878428	151879859	LTR12C:LTR:ERV1:+
chr1	152116612	152118175	SVA_C:Other:Other:-
chr1	152167947	152169745	SVA_C:Other:Other:-
chr1	152228083	152229658	SVA_D:Other:Other:-
chr1	152443879	152445283	SVA_D:Other:Other:-
chr1	152520258	152526394	L1PA4:LINE:L1:-
chr1	152556987	152562717	L1PA16:LINE:L1:+
chr1	152802760	152808854	L1PA4:LINE:L1:+
chr1	152983439	152984233	LTR12:LTR:ERV1:-
chr1	153286737	153293048	L1PA6:LINE:L1:-
chr1	153379472	153385614	L1PA5:LINE:L1:+
chr1	153494078	153495464	LTR12C:LTR:ERV1:+
chr1	153546935	153548457	SVA_C:Other:Other:+
chr1	153554814	153556370	SVA_D:Other:Other:+
chr1	154055210	154055892	LTR12_:LTR:ERV1:-
chr1	154259375	154260904	SVA_D:Other:Other:+
chr1	154503779	154505114	LTR12C:LTR:ERV1:-
chr1	154643043	154644474	LTR12C:LTR:ERV1:+
chr1	154650330	154651788	LTR12C:LTR:ERV1:+
chr1	156297052	156298664	SVA_D:Other:Other:+
chr1	157223697	157229850	L1PA4:LINE:L1:+
chr1	157263764	157270163	L1PA7:LINE:L1:+
chr1	157415227	157416636	LTR12C:LTR:ERV1:-
chr1	157871668	157877777	L1PA6:LINE:L1:+
chr1	158185589	158191737	L1PA4:LINE:L1:-
chr1	158273744	158279784	L1PA4:LINE:L1:+
chr1	158284449	158290475	L1PA3:LINE:L1:-
chr1	158305887	158312026	L1PA4:LINE:L1:+
chr1	158317912	158319335	LTR12C:LTR:ERV1:-
chr1	158342920	158344508	LTR12C:LTR:ERV1:-
chr1	158396810	158403299	L1PA7:LINE:L1:-
chr1	158922530	158928559	L1PA2:LINE:L1:+
chr1	158931203	158938853	L1PA15:LINE:L1:+
chr1	159422743	159428766	L1PA3:LINE:L1:+
chr1	159463441	159464965	LTR12C:LTR:ERV1:-
chr1	159508009	159514038	L1PA4:LINE:L1:+
chr1	159538743	159544894	L1PA3:LINE:L1:-
chr1	159573552	159579692	L1PA3:LINE:L1:+
chr1	159585869	159592363	L1PA7:LINE:L1:+
chr1	159700244	159706365	L1PA3:LINE:L1:+
chr1	160445093	160451241	L1PA3:LINE:L1:-
chr1	160481494	160487817	L1PA10:LINE:L1:+
chr1	160501234	160503102	SVA_A:Other:Other:+
chr1	160879690	160880324	LTR12_:LTR:ERV1:-
chr1	160902426	160903956	SVA_B:Other:Other:+
chr1	161219919	161220405	LTR12F:LTR:ERV1:+
chr1	161250636	161252231	SVA_D:Other:Other:-
chr1	161392048	161394106	SVA_D:Other:Other:+
chr1	161448657	161450084	LTR12C:LTR:ERV1:+
chr1	161585745	161587207	SVA_C:Other:Other:-
chr1	161662648	161669102	L1PA8:LINE:L1:+
chr1	162402761	162404238	LTR12C:LTR:ERV1:+
chr1	162435210	162436613	SVA_D:Other:Other:+
chr1	162715793	162721945	L1PA6:LINE:L1:+
chr1	163515296	163516279	SVA_B:Other:Other:-
chr1	163609725	163615771	L1PA2:LINE:L1:-
chr1	163719477	163725495	L1PA3:LINE:L1:-
chr1	163817661	163823783	L1PA4:LINE:L1:-
chr1	163994167	163994671	LTR12F:LTR:ERV1:-
chr1	164185258	164191422	L1PA3:LINE:L1:+
chr1	164428440	164434490	L1PA2:LINE:L1:+
chr1	165054202	165060347	L1PA3:LINE:L1:+
chr1	165747306	165753390	L1PA4:LINE:L1:-
chr1	166069441	166075601	L1PA4:LINE:L1:+
chr1	166212290	166218321	L1HS:LINE:L1:-
chr1	166280106	166286264	L1PA4:LINE:L1:-
chr1	166311164	166312833	LTR12C:LTR:ERV1:-
chr1	166380536	166386675	L1PA4:LINE:L1:-
chr1	166392706	166399149	L1PA7:LINE:L1:-
chr1	166998454	166999679	SVA_B:Other:Other:+
chr1	167740243	167741395	SVA_A:Other:Other:-
chr1	167774885	167776296	SVA_A:Other:Other:-
chr1	168176404	168177894	SVA_C:Other:Other:-
chr1	168318100	168324117	L1PA2:LINE:L1:-
chr1	168647507	168653861	L1PA8:LINE:L1:-
chr1	168805970	168807373	SVA_B:Other:Other:+
chr1	168961881	168968269	L1PA7:LINE:L1:-
chr1	169220799	169226829	L1PA2:LINE:L1:-
chr1	169305173	169306880	LTR12C:LTR:ERV1:-
chr1	169369935	169376035	L1PA5:LINE:L1:+
chr1	169376866	169383265	L1PA7:LINE:L1:+
chr1	169630271	169631650	LTR12C:LTR:ERV1:+
chr1	169637242	169638648	LTR12C:LTR:ERV1:+
chr1	169851069	169852387	LTR12C:LTR:ERV1:+
chr1	170058312	170064342	L1PA3:LINE:L1:-
chr1	170219071	170220439	LTR12C:LTR:ERV1:-
chr1	170387364	170389034	SVA_D:Other:Other:+
chr1	170395309	170401726	L1PA8:LINE:L1:+
chr1	170433026	170439178	L1PA4:LINE:L1:+
chr1	170608322	170608886	LTR12F:LTR:ERV1:+
chr1	170779889	170786031	L1PA6:LINE:L1:+
chr1	171206276	171212564	L1PA8A:LINE:L1:+
chr1	171274021	171274557	LTR12F:LTR:ERV1:+
chr1	171281541	171282056	LTR12F:LTR:ERV1:+
chr1	171342725	171348736	L1PA2:LINE:L1:+
chr1	171350019	171351382	LTR12C:LTR:ERV1:-
chr1	171359618	171360253	LTR12_:LTR:ERV1:-
chr1	171519607	171525696	L1PA6:LINE:L1:-
chr1	171662278	171663833	SVA_C:Other:Other:-
chr1	172024969	172031001	L1PA3:LINE:L1:+
chr1	172271048	172277171	L1PA6:LINE:L1:+
chr1	172283386	172289535	L1PA3:LINE:L1:+
chr1	172400755	172406868	L1PA6:LINE:L1:+
chr1	172540262	172541856	SVA_D:Other:Other:+
chr1	172560414	172566554	L1PA5:LINE:L1:-
chr1	172772804	172773560	LTR12:LTR:ERV1:+
chr1	172950419	172956446	L1PA2:LINE:L1:-
chr1	173122883	173129044	L1PA4:LINE:L1:+
chr1	173291540	173297653	L1PA4:LINE:L1:+
chr1	173337001	173337529	LTR12F:LTR:ERV1:+
chr1	173344561	173345116	LTR12F:LTR:ERV1:+
chr1	173345610	173346311	LTR12_:LTR:ERV1:+
chr1	173350893	173351590	LTR12_:LTR:ERV1:+
chr1	173581711	173583401	SVA_D:Other:Other:+
chr1	173619247	173625381	L1PA6:LINE:L1:-
chr1	173694903	173701011	L1PA4:LINE:L1:+
chr1	174024670	174026070	LTR12C:LTR:ERV1:-
chr1	174094632	174101037	L1PA8A:LINE:L1:-
chr1	174202404	174208431	L1PA2:LINE:L1:-
chr1	174249912	174250687	LTR12:LTR:ERV1:-
chr1	174346929	174352953	L1PA2:LINE:L1:-
chr1	174559490	174565517	L1HS:LINE:L1:-
chr1	174579195	174585366	L1PA3:LINE:L1:-
chr1	174812364	174818381	L1PA2:LINE:L1:-
chr1	175070211	175072001	LTR12C:LTR:ERV1:-
chr1	175076240	175078158	LTR12C:LTR:ERV1:-
chr1	175961392	175967637	L1PA3:LINE:L1:+
chr1	175971490	175977503	L1PA2:LINE:L1:-
chr1	176026480	176027908	SVA_D:Other:Other:+
chr1	176225221	176231246	L1PA2:LINE:L1:-
chr1	176277531	176283546	L1PA3:LINE:L1:-
chr1	176317674	176318972	LTR12C:LTR:ERV1:-
chr1	176325579	176331122	L1PA6:LINE:L1:+
chr1	177288514	177289224	LTR12:LTR:ERV1:+
chr1	177294588	177295393	LTR12:LTR:ERV1:+
chr1	177348040	177354399	L1PA10:LINE:L1:-
chr1	177370053	177376077	L1PA3:LINE:L1:-
chr1	177603062	177609081	L1PA2:LINE:L1:+
chr1	177640945	177647081	L1PA4:LINE:L1:-
chr1	177661664	177667796	L1PA5:LINE:L1:+
chr1	177955162	177961330	L1PA6:LINE:L1:+
chr1	178213693	178219834	L1PA8:LINE:L1:-
chr1	178283914	178289953	L1PA2:LINE:L1:-
chr1	178806682	178812801	L1PA2:LINE:L1:+
chr1	178944674	178945481	LTR12:LTR:ERV1:+
chr1	178956726	178962708	L1PA3:LINE:L1:-
chr1	179008866	179010815	SVA_D:Other:Other:-
chr1	179103839	179105838	SVA_D:Other:Other:+
chr1	179387124	179388800	SVA_D:Other:Other:-
chr1	179429178	179435384	L1PA5:LINE:L1:-
chr1	179504358	179510596	L1PA6:LINE:L1:-
chr1	179653187	179659330	L1PA5:LINE:L1:-
chr1	179663188	179669564	L1PA7:LINE:L1:+
chr1	179805207	179806630	LTR12C:LTR:ERV1:-
chr1	180302706	180308829	L1PA5:LINE:L1:+
chr1	180477567	180478949	LTR12C:LTR:ERV1:+
chr1	180679339	180680767	SVA_C:Other:Other:-
chr1	180835947	180841979	L1HS:LINE:L1:-
chr1	181014787	181016207	LTR12C:LTR:ERV1:+
chr1	181244998	181251128	L1PA4:LINE:L1:+
chr1	181801376	181803117	LTR12C:LTR:ERV1:+
chr1	181817964	181824340	L1PA8A:LINE:L1:+
chr1	181979316	181980893	SVA_B:Other:Other:+
chr1	182408414	182409822	SVA_D:Other:Other:-
chr1	182477817	182479792	SVA_F:Other:Other:-
chr1	182709688	182711920	SVA_D:Other:Other:-
chr1	184099707	184105891	L1PA4:LINE:L1:-
chr1	184814750	184820775	L1HS:LINE:L1:+
chr1	184970662	184976687	L1PA3:LINE:L1:+
chr1	185034143	185034934	LTR12:LTR:ERV1:+
chr1	185220930	185226937	L1PA2:LINE:L1:-
chr1	185290049	185291379	LTR12C:LTR:ERV1:-
chr1	185347734	185353871	L1PA4:LINE:L1:-
chr1	185555536	185561623	L1PA6:LINE:L1:+
chr1	185617067	185618615	LTR12C:LTR:ERV1:-
chr1	185676529	185682709	L1PA3:LINE:L1:+
chr1	185747478	185753633	L1PA5:LINE:L1:-
chr1	186126621	186132692	L1PA3:LINE:L1:-
chr1	186225732	186231861	L1PA4:LINE:L1:-
chr1	186475543	186481803	L1PA7:LINE:L1:-
chr1	186606463	186612488	L1PA2:LINE:L1:+
chr1	187042105	187043513	LTR12C:LTR:ERV1:-
chr1	187312896	187318926	L1HS:LINE:L1:-
chr1	187519452	187520585	LTR12D:LTR:ERV1:-
chr1	187566803	187572831	L1HS:LINE:L1:+
chr1	187672563	187673985	LTR12C:LTR:ERV1:+
chr1	187819155	187820596	LTR12C:LTR:ERV1:+
chr1	187981611	187982987	LTR12C:LTR:ERV1:-
chr1	188226267	188227145	LTR12:LTR:ERV1:-
chr1	188232236	188232988	LTR12:LTR:ERV1:-
chr1	188721347	188727391	L1PA2:LINE:L1:-
chr1	188782035	188783659	LTR12C:LTR:ERV1:+
chr1	188809392	188810870	LTR12C:LTR:ERV1:-
chr1	188826588	188828276	LTR12C:LTR:ERV1:+
chr1	188866245	188867038	LTR12:LTR:ERV1:-
chr1	189108308	189109760	SVA_B:Other:Other:-
chr1	189194152	189195869	SVA_B:Other:Other:+
chr1	189294414	189300558	L1PA4:LINE:L1:-
chr1	189379768	189385789	L1PA6:LINE:L1:-
chr1	189437866	189443898	L1PA3:LINE:L1:-
chr1	189481800	189488187	L1PA10:LINE:L1:+
chr1	189686666	189687991	LTR12C:LTR:ERV1:-
chr1	189723931	189730081	L1PA3:LINE:L1:+
chr1	190221929	190227477	L1PA6:LINE:L1:-
chr1	190949052	190949804	LTR12:LTR:ERV1:-
chr1	190993976	190995680	LTR12C:LTR:ERV1:-
chr1	191120375	191121523	LTR12C:LTR:ERV1:+
chr1	191312311	191313016	LTR12_:LTR:ERV1:-
chr1	191411940	191418019	L1PA5:LINE:L1:-
chr1	191700761	191702076	LTR12C:LTR:ERV1:+
chr1	191904692	191905362	LTR12_:LTR:ERV1:-
chr1	192467272	192468757	LTR12C:LTR:ERV1:-
chr1	192469714	192475742	L1PA2:LINE:L1:+
chr1	192632095	192638224	L1PA6:LINE:L1:-
chr1	192652084	192657973	L1PA5:LINE:L1:-
chr1	192864323	192865106	LTR12:LTR:ERV1:-
chr1	192880759	192881507	LTR12_:LTR:ERV1:+
chr1	192955857	192957184	LTR12C:LTR:ERV1:+
chr1	193686967	193693022	L1HS:LINE:L1:-
chr1	193887160	193888610	LTR12C:LTR:ERV1:-
chr1	193970788	193972174	LTR12C:LTR:ERV1:+
chr1	194326772	194327964	LTR12C:LTR:ERV1:-
chr1	194391270	194391701	LTR12F:LTR:ERV1:+
chr1	194399518	194400661	LTR12D:LTR:ERV1:-
chr1	194585876	194586838	LTR12:LTR:ERV1:-
chr1	194586914	194587393	LTR12F:LTR:ERV1:+
chr1	194828012	194829376	LTR12C:LTR:ERV1:+
chr1	195023277	195024776	LTR12C:LTR:ERV1:+
chr1	195691100	195692583	LTR12C:LTR:ERV1:-
chr1	196188500	196194532	L1HS:LINE:L1:-
chr1	196491706	196492522	LTR12:LTR:ERV1:+
chr1	196749933	196756085	L1PA3:LINE:L1:-
chr1	196777748	196779242	LTR12C:LTR:ERV1:+
chr1	196905092	196911229	L1PA6:LINE:L1:-
chr1	196955493	196961787	L1PA6:LINE:L1:-
chr1	197038119	197038783	LTR12_:LTR:ERV1:-
chr1	197323469	197325089	LTR12C:LTR:ERV1:-
chr1	197374171	197375722	SVA_D:Other:Other:+
chr1	197676844	197682876	L1HS:LINE:L1:+
chr1	198278576	198284592	L1PA3:LINE:L1:-
chr1	198373797	198374538	LTR12:LTR:ERV1:+
chr1	199014823	199021050	L1PA16:LINE:L1:+
chr1	199411319	199417662	L1PA8A:LINE:L1:-
chr1	199601678	199608132	L1PA7:LINE:L1:+
chr1	199616490	199622600	L1PA5:LINE:L1:+
chr1	199850078	199856212	L1PA4:LINE:L1:-
chr1	199872984	199874527	SVA_D:Other:Other:-
chr1	199928614	199929855	LTR12C:LTR:ERV1:+
chr1	200154495	200160637	L1PA4:LINE:L1:+
chr1	201203233	201209390	L1PA3:LINE:L1:-
chr1	202159959	202161610	SVA_D:Other:Other:-
chr1	202420320	202421730	SVA_D:Other:Other:-
chr1	203810285	203811726	SVA_B:Other:Other:-
chr1	203869179	203870491	LTR12C:LTR:ERV1:+
chr1	205369825	205375987	L1PA3:LINE:L1:-
chr1	206276043	206278006	SVA_D:Other:Other:-
chr1	207369348	207375407	L1PA6:LINE:L1:+
chr1	207380079	207386252	L1PA4:LINE:L1:+
chr1	207543912	207545296	LTR12C:LTR:ERV1:-
chr1	207903811	207909840	L1PA2:LINE:L1:+
chr1	207943748	207949834	L1PA6:LINE:L1:-
chr1	208660918	208662348	LTR12C:LTR:ERV1:-
chr1	208876039	208882374	L1PA3:LINE:L1:+
chr1	208912842	208914265	LTR12C:LTR:ERV1:+
chr1	209164802	209170924	L1PA5:LINE:L1:+
chr1	209301782	209303557	SVA_D:Other:Other:+
chr1	210031201	210032546	LTR12C:LTR:ERV1:-
chr1	210061592	210062849	LTR12C:LTR:ERV1:-
chr1	210071321	210072711	LTR12C:LTR:ERV1:-
chr1	210087138	210093168	L1HS:LINE:L1:-
chr1	210146557	210152695	L1PA4:LINE:L1:-
chr1	211058468	211064890	L1PA6:LINE:L1:+
chr1	211127241	211133387	L1PA6:LINE:L1:-
chr1	211169338	211175483	L1PA5:LINE:L1:+
chr1	211394426	211395114	LTR12_:LTR:ERV1:+
chr1	211402187	211402851	LTR12_:LTR:ERV1:+
chr1	211575632	211581753	L1PA5:LINE:L1:-
chr1	211626743	211632836	L1PA5:LINE:L1:+
chr1	212046744	212048193	LTR12C:LTR:ERV1:-
chr1	212062706	212064060	LTR12C:LTR:ERV1:+
chr1	212187883	212189065	SVA_B:Other:Other:+
chr1	212563807	212569930	L1PA5:LINE:L1:+
chr1	212831367	212837525	L1PA4:LINE:L1:+
chr1	212897548	212899117	SVA_B:Other:Other:+
chr1	213387234	213393362	L1PA4:LINE:L1:+
chr1	213879888	213886311	L1PA7:LINE:L1:-
chr1	214448596	214449389	LTR12:LTR:ERV1:-
chr1	214845625	214847054	LTR12C:LTR:ERV1:-
chr1	214895036	214901448	L1PA7:LINE:L1:-
chr1	215567324	215568306	LTR12D:LTR:ERV1:-
chr1	215600496	215606529	L1PA7:LINE:L1:-
chr1	215705544	215711714	L1PA5:LINE:L1:+
chr1	217696517	217698243	SVA_D:Other:Other:-
chr1	217863834	217869865	L1PA2:LINE:L1:-
chr1	218182569	218188594	L1HS:LINE:L1:-
chr1	218888788	218889348	LTR12_:LTR:ERV1:-
chr1	219583811	219585254	LTR12C:LTR:ERV1:+
chr1	219718311	219720226	SVA_D:Other:Other:+
chr1	220012672	220018849	L1PA3:LINE:L1:+
chr1	220036912	220042937	L1PA3:LINE:L1:+
chr1	220585586	220586848	LTR12C:LTR:ERV1:+
chr1	220639028	220640909	SVA_D:Other:Other:-
chr1	220648192	220649601	LTR12C:LTR:ERV1:-
chr1	220778862	220785034	L1PA6:LINE:L1:-
chr1	220814954	220821404	L1PA10:LINE:L1:+
chr1	221032129	221037738	L1PA7:LINE:L1:-
chr1	221220474	221226896	L1PA7:LINE:L1:+
chr1	221430795	221436957	L1PA5:LINE:L1:-
chr1	221458137	221459563	LTR12C:LTR:ERV1:-
chr1	221556406	221562550	L1PA5:LINE:L1:-
chr1	222222906	222224331	LTR12C:LTR:ERV1:+
chr1	222318844	222325167	L1PA7:LINE:L1:+
chr1	223289507	223290833	LTR12C:LTR:ERV1:-
chr1	223451430	223457585	L1PA5:LINE:L1:+
chr1	223539901	223546029	L1PA3:LINE:L1:-
chr1	223568876	223574899	L1PA2:LINE:L1:-
chr1	223620333	223626365	L1PA3:LINE:L1:+
chr1	224287877	224289435	SVA_D:Other:Other:+
chr1	224536922	224538359	SVA_B:Other:Other:-
chr1	224539358	224540761	LTR12C:LTR:ERV1:-
chr1	225128225	225134320	L1PA4:LINE:L1:-
chr1	225243237	225249358	L1PA4:LINE:L1:-
chr1	225355890	225361977	L1PA4:LINE:L1:+
chr1	225399619	225405719	L1PA5:LINE:L1:-
chr1	225618884	225620446	LTR12C:LTR:ERV1:+
chr1	225660224	225661601	LTR12C:LTR:ERV1:+
chr1	225802715	225804045	SVA_B:Other:Other:+
chr1	225983294	225984581	SVA_A:Other:Other:-
chr1	226157286	226158918	LTR12C:LTR:ERV1:+
chr1	226301999	226303681	SVA_D:Other:Other:-
chr1	226508649	226509204	LTR12_:LTR:ERV1:+
chr1	226613277	226614557	LTR12C:LTR:ERV1:-
chr1	226651724	226652835	LTR12D:LTR:ERV1:+
chr1	226686943	226692568	L1PA5:LINE:L1:-
chr1	227319816	227321658	SVA_D:Other:Other:+
chr1	227463284	227464792	SVA_B:Other:Other:+
chr1	227887596	227893472	L1PA7:LINE:L1:+
chr1	227897702	227899534	SVA_D:Other:Other:-
chr1	228708391	228714536	L1PA4:LINE:L1:-
chr1	228909269	228910596	LTR12C:LTR:ERV1:+
chr1	230001022	230002569	LTR12C:LTR:ERV1:+
chr1	230067068	230068363	SVA_C:Other:Other:-
chr1	230606377	230612812	L1PA7:LINE:L1:-
chr1	230656932	230663471	L1PA7:LINE:L1:-
chr1	231424372	231425787	LTR12C:LTR:ERV1:-
chr1	231565669	231567085	LTR12C:LTR:ERV1:-
chr1	231589279	231590759	SVA_B:Other:Other:+
chr1	231776920	231778215	LTR12C:LTR:ERV1:-
chr1	231781847	231787971	L1PA5:LINE:L1:-
chr1	232042912	232048503	L1PA5:LINE:L1:-
chr1	232449584	232450203	LTR12_:LTR:ERV1:-
chr1	233006365	233007754	LTR12C:LTR:ERV1:-
chr1	233264695	233266039	LTR12C:LTR:ERV1:+
chr1	233531311	233532017	LTR12_:LTR:ERV1:-
chr1	233899911	233906042	L1PA6:LINE:L1:-
chr1	234185372	234191530	L1PA5:LINE:L1:-
chr1	234402623	234404193	SVA_E:Other:Other:-
chr1	235303418	235305294	LTR12C:LTR:ERV1:+
chr1	235471755	235473508	SVA_D:Other:Other:+
chr1	235545128	235551075	L1PA3:LINE:L1:-
chr1	235756818	235758248	LTR12C:LTR:ERV1:-
chr1	236349656	236356092	L1PA7:LINE:L1:-
chr1	236549251	236551319	SVA_F:Other:Other:+
chr1	236591281	236592518	SVA_B:Other:Other:-
chr1	237182767	237188794	L1HS:LINE:L1:-
chr1	237290079	237291716	SVA_F:Other:Other:-
chr1	237471782	237473467	LTR12C:LTR:ERV1:-
chr1	237832175	237833638	SVA_D:Other:Other:-
chr1	237983521	237989950	L1PA7:LINE:L1:+
chr1	238200414	238206565	L1PA3:LINE:L1:-
chr1	238517781	238518637	LTR12:LTR:ERV1:+
chr1	238846912	238848496	LTR12C:LTR:ERV1:-
chr1	239418061	239419361	LTR12D:LTR:ERV1:-
chr1	239786798	239792823	L1HS:LINE:L1:-
chr1	239801068	239807209	L1PA3:LINE:L1:-
chr1	240087280	240088624	LTR12C:LTR:ERV1:-
chr1	240925607	240926995	LTR12C:LTR:ERV1:+
chr1	241058564	241064698	L1PA5:LINE:L1:-
chr1	241588285	241594694	L1PA7:LINE:L1:-
chr1	242018019	242019441	LTR12C:LTR:ERV1:-
chr1	242208863	242214887	L1PA2:LINE:L1:-
chr1	242315662	242322074	L1PA7:LINE:L1:-
chr1	242332442	242338355	L1PA5:LINE:L1:+
chr1	242644375	242650524	L1PA4:LINE:L1:+
chr1	242749944	242756394	L1PA7:LINE:L1:+
chr1	242852552	242854022	LTR12C:LTR:ERV1:+
chr1	242936708	242938059	LTR12C:LTR:ERV1:-
chr1	243743343	243750197	L1PA16:LINE:L1:+
chr1	243970349	243976492	L1PA5:LINE:L1:+
chr1	244726035	244732688	L1PA7:LINE:L1:-
chr1	244845160	244845706	LTR12_:LTR:ERV1:-
chr1	245937967	245939032	SVA_D:Other:Other:+
chr1	245979841	245985862	L1PA3:LINE:L1:+
chr1	246047949	246048638	LTR12_:LTR:ERV1:+
chr1	246525726	246527240	SVA_D:Other:Other:+
chr1	246873889	246874746	LTR12:LTR:ERV1:+
chr1	246875561	246876415	LTR12:LTR:ERV1:+
chr1	247383255	247384559	SVA_D:Other:Other:+
chr1	247670824	247677276	L1PA7:LINE:L1:-
chr1	247684648	247686235	SVA_C:Other:Other:+
chr1	247730455	247736938	L1PA8:LINE:L1:-
chr1	247850475	247856506	L1HS:LINE:L1:+
chr1	248051624	248057640	L1PA2:LINE:L1:-
chr1	248230814	248236938	L1PA3:LINE:L1:+
chr1	248329861	248335891	L1PA2:LINE:L1:-
chr1	248416163	248422179	L1PA3:LINE:L1:+
chr1	248691258	248697242	L1PA3:LINE:L1:+
chr1	248839625	248840880	SVA_D:Other:Other:+
chr1	249123933	249125178	SVA_B:Other:Other:+
chr2	16774993	16781026	L1HS:LINE:L1:-
chr2	159379129	159385161	L1PA2:LINE:L1:+
chr2	234880191	234881676	LTR12C:LTR:ERV1:-
chr2	18873464	18879603	L1PA4:LINE:L1:-
chr2	190835712	190841851	L1PA5:LINE:L1:-
chr2	221246938	221253064	L1PA5:LINE:L1:-
chr2	11136231	11142262	L1HS:LINE:L1:-
chr2	18084714	18090863	L1PA5:LINE:L1:-
chr2	31719227	31725317	L1PA4:LINE:L1:+
chr2	34860378	34866543	L1PA4:LINE:L1:+
chr2	40235740	40241759	L1PA2:LINE:L1:-
chr2	55963464	55969528	L1PA3:LINE:L1:-
chr2	63437611	63443856	L1PA5:LINE:L1:+
chr2	66190195	66196348	L1PA4:LINE:L1:-
chr2	97120171	97126522	L1PA8:LINE:L1:+
chr2	124386300	124392318	L1PA3:LINE:L1:+
chr2	136049167	136055281	L1PA4:LINE:L1:-
chr2	137226554	137232392	L1PA6:LINE:L1:+
chr2	166588173	166594204	L1PA2:LINE:L1:-
chr2	178650123	178656277	L1PA3:LINE:L1:+
chr2	180616663	180622826	L1PA5:LINE:L1:-
chr2	190183916	190190050	L1PA5:LINE:L1:+
chr2	204209355	204210191	LTR12:LTR:ERV1:+
chr2	210106684	210112222	L1PA7:LINE:L1:+
chr2	214431955	214437986	L1HS:LINE:L1:-
chr2	227929601	227935618	L1PA3:LINE:L1:+
chr2	234486485	234492516	L1PA3:LINE:L1:-
chr2	235797033	235803063	L1PA2:LINE:L1:+
chr2	90809	92246	LTR12C:LTR:ERV1:+
chr2	126167	127645	SVA_E:Other:Other:+
chr2	190509	191898	LTR12C:LTR:ERV1:-
chr2	799551	805575	L1PA3:LINE:L1:+
chr2	1232509	1233932	LTR12C:LTR:ERV1:-
chr2	1386506	1392621	L1PA5:LINE:L1:-
chr2	1763735	1769814	L1PA5:LINE:L1:+
chr2	3373017	3379166	L1PA3:LINE:L1:+
chr2	3616115	3617630	SVA_D:Other:Other:-
chr2	3662745	3664405	SVA_C:Other:Other:-
chr2	3841954	3847985	L1PA3:LINE:L1:-
chr2	3906488	3907169	LTR12_:LTR:ERV1:-
chr2	4205398	4211449	L1PA3:LINE:L1:+
chr2	4690558	4696555	L1PA2:LINE:L1:+
chr2	4781319	4787350	L1HS:LINE:L1:+
chr2	4982039	4983469	LTR12C:LTR:ERV1:-
chr2	6467596	6473211	L1PA6:LINE:L1:-
chr2	9178460	9184625	L1PA4:LINE:L1:+
chr2	10001091	10007222	L1PA4:LINE:L1:+
chr2	10145692	10146865	LTR12D:LTR:ERV1:-
chr2	10231371	10232984	LTR12C:LTR:ERV1:+
chr2	11042072	11044034	SVA_F:Other:Other:-
chr2	11304661	11306135	SVA_C:Other:Other:-
chr2	11899333	11900853	SVA_C:Other:Other:-
chr2	12021586	12027729	L1PA4:LINE:L1:-
chr2	12274226	12279737	L1PA7:LINE:L1:-
chr2	12661872	12667897	L1PA2:LINE:L1:-
chr2	12992931	12994751	LTR12C:LTR:ERV1:-
chr2	13447692	13448984	LTR12C:LTR:ERV1:-
chr2	13561891	13568368	L1PA8:LINE:L1:-
chr2	13873395	13879409	L1PA3:LINE:L1:-
chr2	13941554	13942005	LTR12F:LTR:ERV1:-
chr2	14239258	14245416	L1PA4:LINE:L1:+
chr2	14641576	14647733	L1PA3:LINE:L1:-
chr2	14923448	14929601	L1PA3:LINE:L1:-
chr2	14988188	14994202	L1PA2:LINE:L1:+
chr2	15141748	15143223	LTR12C:LTR:ERV1:-
chr2	15456373	15462508	L1PA6:LINE:L1:+
chr2	15579624	15585791	L1PA3:LINE:L1:+
chr2	15751005	15753178	SVA_D:Other:Other:-
chr2	15836007	15837410	LTR12C:LTR:ERV1:-
chr2	17374638	17376022	LTR12C:LTR:ERV1:+
chr2	17626729	17632989	L1PA8:LINE:L1:+
chr2	18164397	18170345	L1PA4:LINE:L1:-
chr2	18193282	18199290	L1PA2:LINE:L1:-
chr2	18320350	18326551	L1PA6:LINE:L1:-
chr2	18343487	18349931	L1PA7:LINE:L1:-
chr2	18639473	18645589	L1PA7:LINE:L1:-
chr2	19289027	19295149	L1PA6:LINE:L1:+
chr2	19505600	19511623	L1PA2:LINE:L1:+
chr2	19583732	19589864	L1PA4:LINE:L1:-
chr2	20305742	20306841	LTR12D:LTR:ERV1:-
chr2	20658067	20664545	L1PA7:LINE:L1:+
chr2	21105211	21111372	L1PA4:LINE:L1:-
chr2	21431416	21437609	L1PA3:LINE:L1:-
chr2	21558810	21564936	L1PA4:LINE:L1:+
chr2	21743873	21749962	L1PA5:LINE:L1:-
chr2	22126183	22132216	L1PA3:LINE:L1:-
chr2	22379314	22385326	L1PA3:LINE:L1:+
chr2	22409032	22410426	LTR12C:LTR:ERV1:+
chr2	23207025	23213040	L1PA2:LINE:L1:+
chr2	23394422	23400568	L1PA5:LINE:L1:+
chr2	23447722	23453757	L1PA2:LINE:L1:-
chr2	23959438	23965581	L1PA4:LINE:L1:+
chr2	24318027	24324128	L1PA6:LINE:L1:+
chr2	24625555	24626915	LTR12E:LTR:ERV1:+
chr2	25023192	25029340	L1PA4:LINE:L1:-
chr2	25856056	25857939	SVA_D:Other:Other:+
chr2	25927922	25929331	SVA_C:Other:Other:+
chr2	25945507	25947023	SVA_D:Other:Other:-
chr2	26132611	26134456	SVA_D:Other:Other:-
chr2	26138187	26139744	LTR12C:LTR:ERV1:+
chr2	26592737	26594781	SVA_D:Other:Other:-
chr2	27037156	27038455	LTR12C:LTR:ERV1:+
chr2	27333552	27334885	LTR12C:LTR:ERV1:-
chr2	27581592	27583122	SVA_F:Other:Other:+
chr2	28695380	28696868	LTR12C:LTR:ERV1:+
chr2	28697794	28698284	LTR12F:LTR:ERV1:-
chr2	31127064	31133089	L1PA2:LINE:L1:+
chr2	31702218	31709495	L1PA14:LINE:L1:-
chr2	31942662	31948912	L1PA8:LINE:L1:+
chr2	32020406	32026495	L1PA5:LINE:L1:+
chr2	32028612	32029951	LTR12C:LTR:ERV1:+
chr2	32325536	32331655	L1PA5:LINE:L1:-
chr2	32518145	32520112	SVA_D:Other:Other:-
chr2	32671819	32673760	SVA_E:Other:Other:-
chr2	32979211	32980708	SVA_D:Other:Other:-
chr2	33110748	33112189	LTR12C:LTR:ERV1:-
chr2	33281591	33283058	LTR12C:LTR:ERV1:-
chr2	33395080	33401232	L1PA3:LINE:L1:+
chr2	33985930	33987285	SVA_C:Other:Other:-
chr2	34000242	34001682	LTR12C:LTR:ERV1:+
chr2	34022565	34023241	LTR12:LTR:ERV1:+
chr2	34115818	34116353	LTR12F:LTR:ERV1:+
chr2	34357577	34358998	SVA_C:Other:Other:-
chr2	34366619	34368129	LTR12C:LTR:ERV1:-
chr2	34657202	34657953	LTR12:LTR:ERV1:+
chr2	34691283	34697717	L1PA7:LINE:L1:+
chr2	34719176	34720569	LTR12C:LTR:ERV1:+
chr2	35216944	35218024	LTR12D:LTR:ERV1:+
chr2	35237514	35243658	L1PA4:LINE:L1:+
chr2	35331926	35338075	L1PA3:LINE:L1:-
chr2	35544823	35550966	L1PA4:LINE:L1:-
chr2	35788127	35794271	L1PA4:LINE:L1:-
chr2	35958924	35965407	L1PA11:LINE:L1:+
chr2	36125987	36132085	L1PA5:LINE:L1:-
chr2	36319201	36320595	LTR12C:LTR:ERV1:+
chr2	36324751	36330283	L1PA3:LINE:L1:+
chr2	36339649	36345680	L1HS:LINE:L1:-
chr2	36406438	36408320	SVA_D:Other:Other:+
chr2	36915221	36916609	LTR12C:LTR:ERV1:+
chr2	37821340	37827470	L1PA6:LINE:L1:-
chr2	37950299	37956413	L1PA5:LINE:L1:+
chr2	38159224	38160958	SVA_D:Other:Other:-
chr2	38163045	38169498	L1PA7:LINE:L1:-
chr2	38183799	38190308	L1PA7:LINE:L1:-
chr2	38203995	38205494	SVA_B:Other:Other:-
chr2	38231838	38238001	L1PA4:LINE:L1:-
chr2	38247482	38248821	LTR12C:LTR:ERV1:+
chr2	38359549	38365734	L1PA4:LINE:L1:-
chr2	38624270	38625554	LTR12C:LTR:ERV1:+
chr2	38629800	38631536	SVA_D:Other:Other:+
chr2	38869427	38870757	LTR12C:LTR:ERV1:-
chr2	38982395	38983894	SVA_D:Other:Other:-
chr2	39471233	39472660	LTR12C:LTR:ERV1:+
chr2	39802132	39808292	L1PA5:LINE:L1:-
chr2	39812323	39813702	LTR12C:LTR:ERV1:+
chr2	39854662	39856386	SVA_D:Other:Other:-
chr2	40018596	40019119	LTR12F:LTR:ERV1:-
chr2	40034848	40041278	L1PA7:LINE:L1:-
chr2	40052132	40058577	L1PA7:LINE:L1:-
chr2	40459740	40465767	L1PA2:LINE:L1:-
chr2	41562547	41563835	LTR12C:LTR:ERV1:+
chr2	42222143	42223333	SVA_D:Other:Other:+
chr2	42240869	42242785	SVA_D:Other:Other:-
chr2	42848272	42849581	SVA_C:Other:Other:-
chr2	43216615	43222642	L1PA3:LINE:L1:+
chr2	43289652	43291201	SVA_D:Other:Other:-
chr2	43770008	43776160	L1PA3:LINE:L1:-
chr2	43887610	43893639	L1PA2:LINE:L1:-
chr2	43904342	43905900	SVA_D:Other:Other:-
chr2	44293507	44295518	SVA_D:Other:Other:-
chr2	45286698	45292726	L1PA2:LINE:L1:-
chr2	45302883	45308915	L1PA2:LINE:L1:+
chr2	45358789	45359311	LTR12F:LTR:ERV1:-
chr2	46143890	46145378	LTR12C:LTR:ERV1:-
chr2	46699197	46705243	L1PA5:LINE:L1:-
chr2	47326688	47328118	LTR12C:LTR:ERV1:+
chr2	47334236	47335721	LTR12C:LTR:ERV1:+
chr2	48200662	48206997	L1PA6:LINE:L1:+
chr2	48280021	48285558	L1PA5:LINE:L1:-
chr2	48841002	48842660	SVA_D:Other:Other:-
chr2	48929403	48935299	L1PA6:LINE:L1:-
chr2	48966978	48972998	L1PA3:LINE:L1:+
chr2	49407670	49413527	L1PA7:LINE:L1:-
chr2	49437038	49443076	L1PA6:LINE:L1:+
chr2	49454725	49460932	L1PA6:LINE:L1:-
chr2	49525612	49531693	L1PA6:LINE:L1:+
chr2	50109027	50115486	L1PA7:LINE:L1:+
chr2	50310564	50311899	LTR12C:LTR:ERV1:-
chr2	50584922	50591386	L1PA7:LINE:L1:+
chr2	50638164	50639464	SVA_B:Other:Other:+
chr2	51054762	51056423	SVA_D:Other:Other:-
chr2	51377675	51379323	LTR12C:LTR:ERV1:-
chr2	51539859	51545983	L1PA4:LINE:L1:-
chr2	51618535	51624774	L1PA7:LINE:L1:+
chr2	51827158	51833388	L1PA10:LINE:L1:-
chr2	52006576	52007999	LTR12C:LTR:ERV1:-
chr2	52233754	52235152	LTR12C:LTR:ERV1:+
chr2	52266543	52272690	L1PA3:LINE:L1:-
chr2	52801492	52808415	L1PA15-16:LINE:L1:-
chr2	53485894	53487191	LTR12D:LTR:ERV1:-
chr2	53583403	53584890	LTR12C:LTR:ERV1:+
chr2	53814170	53820181	L1PA3:LINE:L1:+
chr2	54322030	54324009	SVA_D:Other:Other:-
chr2	54649136	54649836	LTR12:LTR:ERV1:-
chr2	54712294	54713871	SVA_D:Other:Other:+
chr2	54925558	54926965	SVA_C:Other:Other:+
chr2	55669242	55675009	L1PA3:LINE:L1:+
chr2	55689297	55695446	L1PA6:LINE:L1:+
chr2	55877270	55878924	SVA_D:Other:Other:+
chr2	56000065	56001865	SVA_F:Other:Other:-
chr2	56015252	56021396	L1PA4:LINE:L1:-
chr2	56041167	56047290	L1PA4:LINE:L1:+
chr2	56058678	56064818	L1PA6:LINE:L1:-
chr2	56286836	56293138	L1PA7:LINE:L1:-
chr2	56319715	56325848	L1PA5:LINE:L1:+
chr2	56364285	56370411	L1PA4:LINE:L1:-
chr2	56648200	56654360	L1PA4:LINE:L1:+
chr2	56778732	56784880	L1PA3:LINE:L1:-
chr2	56858378	56864527	L1PA4:LINE:L1:-
chr2	57645845	57651854	L1PA2:LINE:L1:+
chr2	57835982	57841983	L1PA3:LINE:L1:+
chr2	58398749	58404923	L1PA3:LINE:L1:+
chr2	58552476	58558398	L1PA4:LINE:L1:+
chr2	58608677	58614701	L1PA2:LINE:L1:-
chr2	59313885	59320021	L1PA4:LINE:L1:-
chr2	59553442	59559575	L1PA4:LINE:L1:+
chr2	60262008	60267888	L1PA4:LINE:L1:+
chr2	60310797	60316829	L1PA2:LINE:L1:+
chr2	60357311	60363475	L1PA5:LINE:L1:-
chr2	60368326	60374358	L1PA2:LINE:L1:+
chr2	60416158	60422188	L1PA3:LINE:L1:+
chr2	62268794	62269893	LTR12D:LTR:ERV1:-
chr2	62742655	62748790	L1PA5:LINE:L1:-
chr2	62762587	62763076	LTR12F:LTR:ERV1:-
chr2	62808020	62814121	L1PA4:LINE:L1:-
chr2	62832372	62838510	L1PA4:LINE:L1:+
chr2	62843553	62849864	L1PA7:LINE:L1:-
chr2	62856792	62858356	SVA_C:Other:Other:+
chr2	62872845	62878861	L1PA3:LINE:L1:-
chr2	62976120	62982272	L1PA5:LINE:L1:-
chr2	63062613	63068633	L1PA2:LINE:L1:+
chr2	63555188	63555800	LTR12D:LTR:ERV1:+
chr2	63757857	63763758	L1PA6:LINE:L1:+
chr2	63948843	63950437	SVA_F:Other:Other:+
chr2	64028446	64028942	LTR12F:LTR:ERV1:-
chr2	64035437	64037039	SVA_D:Other:Other:+
chr2	64153650	64159799	L1PA7:LINE:L1:+
chr2	64268481	64269645	SVA_D:Other:Other:-
chr2	65118160	65124209	L1PA5:LINE:L1:+
chr2	65195955	65197372	LTR12C:LTR:ERV1:+
chr2	65565455	65566852	SVA_D:Other:Other:+
chr2	65827105	65828965	SVA_D:Other:Other:-
chr2	66151322	66157477	L1PA3:LINE:L1:-
chr2	66366081	66372071	L1PA3:LINE:L1:-
chr2	66404302	66410334	L1PA2:LINE:L1:+
chr2	66433461	66439501	L1PA3:LINE:L1:+
chr2	66574016	66580158	L1PA5:LINE:L1:-
chr2	66618262	66624282	L1PA2:LINE:L1:+
chr2	66836777	66842896	L1PA6:LINE:L1:-
chr2	66854220	66860367	L1PA3:LINE:L1:-
chr2	66869780	66875875	L1PA4:LINE:L1:-
chr2	67416943	67423099	L1PA4:LINE:L1:-
chr2	67583196	67589423	L1PA3:LINE:L1:+
chr2	67816066	67822178	L1PA6:LINE:L1:+
chr2	67966102	67972236	L1PA6:LINE:L1:-
chr2	68290922	68297028	L1PA5:LINE:L1:+
chr2	68624866	68631138	L1PA7:LINE:L1:-
chr2	68632040	68638471	L1PA7:LINE:L1:+
chr2	69849032	69850460	LTR12C:LTR:ERV1:+
chr2	70375275	70376923	LTR12C:LTR:ERV1:+
chr2	70493596	70494947	SVA_B:Other:Other:-
chr2	71069328	71075450	L1PA6:LINE:L1:+
chr2	71103043	71109214	L1PA6:LINE:L1:+
chr2	71318652	71320181	LTR12C:LTR:ERV1:-
chr2	71387604	71389208	SVA_D:Other:Other:+
chr2	71448883	71449334	LTR12F:LTR:ERV1:+
chr2	71472942	71478686	L1PA6:LINE:L1:-
chr2	71638604	71644631	L1HS:LINE:L1:-
chr2	71769504	71770985	SVA_C:Other:Other:-
chr2	72243079	72249090	L1PA3:LINE:L1:-
chr2	72291105	72297127	L1PA2:LINE:L1:+
chr2	72313836	72315149	LTR12C:LTR:ERV1:+
chr2	72630859	72636998	L1PA4:LINE:L1:+
chr2	72648774	72650520	LTR12C:LTR:ERV1:+
chr2	73687581	73693778	L1PA4:LINE:L1:+
chr2	73707203	73713226	L1PA2:LINE:L1:-
chr2	73765527	73771652	L1PA4:LINE:L1:+
chr2	73891627	73897757	L1PA5:LINE:L1:-
chr2	73948522	73954676	L1PA3:LINE:L1:+
chr2	75022243	75024207	SVA_D:Other:Other:-
chr2	75596022	75602161	L1PA6:LINE:L1:-
chr2	75951685	75952931	SVA_D:Other:Other:+
chr2	76061063	76067288	L1PA7:LINE:L1:+
chr2	76317774	76323911	L1PA3:LINE:L1:-
chr2	76572278	76578454	L1PA3:LINE:L1:-
chr2	76875117	76881146	L1PA3:LINE:L1:-
chr2	76908522	76908947	LTR12F:LTR:ERV1:+
chr2	76924631	76925811	LTR12C:LTR:ERV1:-
chr2	76929218	76935241	L1PA3:LINE:L1:-
chr2	76949960	76956159	L1PA3:LINE:L1:-
chr2	77002884	77008884	L1PA2:LINE:L1:-
chr2	77389033	77395089	L1PA5:LINE:L1:+
chr2	77446895	77452499	L1PA4:LINE:L1:+
chr2	77817434	77818847	LTR12C:LTR:ERV1:+
chr2	77819957	77825971	L1PA3:LINE:L1:+
chr2	77838789	77844860	L1PA10:LINE:L1:+
chr2	77884379	77885079	LTR12:LTR:ERV1:-
chr2	77960995	77962445	LTR12C:LTR:ERV1:-
chr2	77980898	77986904	L1PA2:LINE:L1:+
chr2	78042355	78042951	LTR12_:LTR:ERV1:-
chr2	79005943	79007321	LTR12C:LTR:ERV1:+
chr2	79332819	79338822	L1PA3:LINE:L1:-
chr2	79509382	79515397	L1PA3:LINE:L1:-
chr2	80320127	80326280	L1PA4:LINE:L1:-
chr2	80437338	80443503	L1PA5:LINE:L1:-
chr2	80963551	80968801	L1PA8:LINE:L1:+
chr2	81042370	81048147	L1PA8A:LINE:L1:+
chr2	81262249	81262857	LTR12_:LTR:ERV1:+
chr2	81267378	81267935	LTR12_:LTR:ERV1:+
chr2	81584089	81590224	L1PA6:LINE:L1:-
chr2	82212122	82213512	LTR12C:LTR:ERV1:+
chr2	82478317	82484937	L1PA11:LINE:L1:-
chr2	82552413	82553884	LTR12C:LTR:ERV1:-
chr2	83102425	83109022	L1PA11:LINE:L1:+
chr2	83164622	83166134	LTR12C:LTR:ERV1:-
chr2	83194197	83194750	LTR12F:LTR:ERV1:-
chr2	83212103	83213400	LTR12E:LTR:ERV1:-
chr2	83315928	83321955	L1PA2:LINE:L1:+
chr2	83404279	83404945	LTR12_:LTR:ERV1:-
chr2	83407984	83409355	LTR12C:LTR:ERV1:+
chr2	83472345	83473615	LTR12C:LTR:ERV1:-
chr2	83574598	83580613	L1PA3:LINE:L1:+
chr2	83826564	83827070	LTR12F:LTR:ERV1:-
chr2	84203524	84209668	L1PA4:LINE:L1:+
chr2	84354904	84355615	LTR12:LTR:ERV1:+
chr2	84451862	84458034	L1PA3:LINE:L1:+
chr2	84489503	84495646	L1PA5:LINE:L1:+
chr2	84665812	84666287	LTR12F:LTR:ERV1:+
chr2	84732682	84738824	L1PA4:LINE:L1:-
chr2	84889273	84895375	L1PA5:LINE:L1:+
chr2	85560499	85562038	LTR12C:LTR:ERV1:-
chr2	85682437	85682923	LTR12F:LTR:ERV1:-
chr2	85714147	85716186	SVA_D:Other:Other:+
chr2	86155559	86156566	LTR12D:LTR:ERV1:-
chr2	86190929	86197073	L1PA4:LINE:L1:+
chr2	86771466	86773523	SVA_A:Other:Other:-
chr2	86882361	86888391	L1HS:LINE:L1:-
chr2	86890808	86896969	L1PA6:LINE:L1:+
chr2	88590541	88591076	LTR12F:LTR:ERV1:+
chr2	88802510	88803921	LTR12C:LTR:ERV1:+
chr2	89435673	89436090	LTR12F:LTR:ERV1:+
chr2	90084277	90084694	LTR12F:LTR:ERV1:-
chr2	90417552	90423676	L1PA4:LINE:L1:+
chr2	91639329	91645453	L1PA4:LINE:L1:+
chr2	92089384	92095510	L1PA5:LINE:L1:+
chr2	92109199	92115230	L1PA2:LINE:L1:+
chr2	95758488	95764597	L1PA6:LINE:L1:+
chr2	95908561	95910103	SVA_D:Other:Other:+
chr2	95917834	95923958	L1PA4:LINE:L1:-
chr2	96130855	96131974	LTR12D:LTR:ERV1:+
chr2	96276257	96277376	LTR12D:LTR:ERV1:-
chr2	96444224	96450367	L1PA6:LINE:L1:+
chr2	96535277	96541438	L1PA3:LINE:L1:+
chr2	96705709	96711852	L1PA6:LINE:L1:-
chr2	97044719	97050869	L1PA3:LINE:L1:+
chr2	97679645	97680727	LTR12D:LTR:ERV1:+
chr2	97891364	97897516	L1PA3:LINE:L1:-
chr2	98141883	98148029	L1PA3:LINE:L1:+
chr2	98212498	98218661	L1PA5:LINE:L1:-
chr2	98488933	98495319	L1PA7:LINE:L1:+
chr2	98755282	98756710	LTR12C:LTR:ERV1:+
chr2	99594298	99600476	L1PA4:LINE:L1:+
chr2	99604642	99606203	SVA_C:Other:Other:-
chr2	100768069	100774259	L1PA4:LINE:L1:-
chr2	101932386	101937928	L1PA6:LINE:L1:+
chr2	102940831	102946961	L1PA4:LINE:L1:+
chr2	103182814	103188844	L1HS:LINE:L1:-
chr2	103490479	103496633	L1PA3:LINE:L1:-
chr2	103817023	103823152	L1PA4:LINE:L1:+
chr2	104087132	104092702	L1PA6:LINE:L1:-
chr2	104232965	104233455	LTR12F:LTR:ERV1:+
chr2	105240218	105246633	L1PA7:LINE:L1:-
chr2	105570064	105576213	L1PA6:LINE:L1:-
chr2	105826121	105828425	SVA_E:Other:Other:-
chr2	105867071	105868590	SVA_D:Other:Other:+
chr2	106747348	106753381	L1PA2:LINE:L1:+
chr2	106936712	106937319	LTR12F:LTR:ERV1:-
chr2	106949597	106950319	LTR12:LTR:ERV1:-
chr2	107193599	107194045	LTR12F:LTR:ERV1:-
chr2	107200700	107202182	LTR12C:LTR:ERV1:+
chr2	107652306	107659625	L1PA14:LINE:L1:+
chr2	107755732	107761848	L1PA5:LINE:L1:-
chr2	107910274	107916426	L1PA4:LINE:L1:-
chr2	108008561	108009937	LTR12C:LTR:ERV1:+
chr2	108084844	108086355	LTR12C:LTR:ERV1:-
chr2	108151671	108153100	LTR12C:LTR:ERV1:-
chr2	108363079	108364358	LTR12C:LTR:ERV1:-
chr2	108370046	108370648	LTR12_:LTR:ERV1:-
chr2	108647845	108649475	LTR12C:LTR:ERV1:+
chr2	108819599	108825723	L1PA3:LINE:L1:-
chr2	109728087	109734241	L1PA3:LINE:L1:-
chr2	110253515	110254055	LTR12F:LTR:ERV1:-
chr2	110703919	110704372	LTR12F:LTR:ERV1:-
chr2	110710533	110716670	L1PA6:LINE:L1:+
chr2	110820998	110822248	SVA_B:Other:Other:-
chr2	110946772	110948335	LTR12C:LTR:ERV1:-
chr2	110948606	110954506	L1PA4:LINE:L1:+
chr2	111001867	111002320	LTR12F:LTR:ERV1:-
chr2	111008498	111014636	L1PA6:LINE:L1:+
chr2	111064253	111065641	SVA_B:Other:Other:+
chr2	111169972	111176109	L1PA6:LINE:L1:-
chr2	111182287	111182740	LTR12F:LTR:ERV1:+
chr2	111557212	111557848	LTR12F:LTR:ERV1:+
chr2	111613299	111613829	LTR12F:LTR:ERV1:-
chr2	112429618	112431067	SVA_B:Other:Other:+
chr2	112439244	112440830	LTR12C:LTR:ERV1:+
chr2	113261389	113267422	L1HS:LINE:L1:-
chr2	113666034	113666499	LTR12F:LTR:ERV1:-
chr2	114229058	114235122	L1PA3:LINE:L1:-
chr2	114461445	114462547	LTR12C:LTR:ERV1:-
chr2	114770528	114776703	L1PA3:LINE:L1:-
chr2	114853875	114859982	L1PA3:LINE:L1:-
chr2	116134126	116140149	L1PA3:LINE:L1:-
chr2	116557007	116563149	L1PA4:LINE:L1:-
chr2	116646622	116653117	L1PA7:LINE:L1:-
chr2	116717649	116723728	L1PA6:LINE:L1:-
chr2	116806517	116812543	L1PA2:LINE:L1:-
chr2	117046714	117047190	LTR12F:LTR:ERV1:+
chr2	117758727	117764853	L1PA6:LINE:L1:+
chr2	117828062	117829687	LTR12C:LTR:ERV1:-
chr2	117913610	117919627	L1PA2:LINE:L1:+
chr2	118229774	118236348	L1PA8:LINE:L1:+
chr2	118380829	118386852	L1PA3:LINE:L1:+
chr2	118406760	118412791	L1PA3:LINE:L1:+
chr2	118535754	118541892	L1PA3:LINE:L1:+
chr2	118561356	118567385	L1PA3:LINE:L1:+
chr2	118681259	118686848	L1PA4:LINE:L1:+
chr2	118894576	118900596	L1PA2:LINE:L1:-
chr2	119167739	119173280	L1PA6:LINE:L1:+
chr2	119208902	119215314	L1PA7:LINE:L1:-
chr2	119653337	119659368	L1PA2:LINE:L1:-
chr2	119853344	119859423	L1PA5:LINE:L1:+
chr2	120754376	120755784	LTR12C:LTR:ERV1:+
chr2	120803248	120809394	L1PA5:LINE:L1:-
chr2	120837684	120843203	L1PA5:LINE:L1:-
chr2	121016384	121017893	LTR12C:LTR:ERV1:-
chr2	122649618	122651368	SVA_F:Other:Other:+
chr2	122770249	122776284	L1PA2:LINE:L1:-
chr2	122803780	122809825	L1PA3:LINE:L1:-
chr2	123308321	123314392	L1PA5:LINE:L1:+
chr2	123529366	123535810	L1PA8:LINE:L1:+
chr2	124441165	124443947	LTR12C:LTR:ERV1:+
chr2	124556173	124562283	L1PA6:LINE:L1:-
chr2	124583486	124584877	LTR12C:LTR:ERV1:-
chr2	124612895	124619168	L1PA10:LINE:L1:+
chr2	124880526	124886650	L1PA5:LINE:L1:+
chr2	124897352	124903384	L1PA2:LINE:L1:+
chr2	125113883	125119911	L1PA2:LINE:L1:-
chr2	125165447	125171459	L1PA2:LINE:L1:+
chr2	125350716	125356745	L1PA2:LINE:L1:-
chr2	125383859	125390301	L1PA10:LINE:L1:+
chr2	125434580	125435440	LTR12:LTR:ERV1:-
chr2	125744168	125745525	LTR12C:LTR:ERV1:-
chr2	125794737	125795664	LTR12D:LTR:ERV1:+
chr2	126034152	126035402	SVA_B:Other:Other:-
chr2	126179639	126181349	LTR12C:LTR:ERV1:+
chr2	126235789	126237274	LTR12C:LTR:ERV1:-
chr2	126388934	126389590	LTR12_:LTR:ERV1:+
chr2	126422295	126422971	LTR12_:LTR:ERV1:-
chr2	126486154	126486983	LTR12:LTR:ERV1:+
chr2	126583110	126589251	L1PA3:LINE:L1:+
chr2	126699672	126701058	LTR12C:LTR:ERV1:-
chr2	126935625	126941641	L1HS:LINE:L1:-
chr2	127715220	127721639	L1PA8A:LINE:L1:-
chr2	128110252	128111835	SVA_D:Other:Other:+
chr2	128417622	128418323	LTR12_:LTR:ERV1:+
chr2	128811203	128811685	LTR12F:LTR:ERV1:-
chr2	128973496	128974071	LTR12F:LTR:ERV1:+
chr2	129428775	129430262	LTR12C:LTR:ERV1:-
chr2	129455129	129455519	LTR12_:LTR:ERV1:-
chr2	129517763	129524019	L1PA11:LINE:L1:-
chr2	129616558	129622590	L1PA2:LINE:L1:-
chr2	129700881	129707005	L1PA5:LINE:L1:-
chr2	129795791	129801825	L1PA4:LINE:L1:-
chr2	129802734	129808391	L1PA7:LINE:L1:-
chr2	129901394	129902369	LTR12D:LTR:ERV1:-
chr2	130086935	130087444	LTR12F:LTR:ERV1:+
chr2	130289493	130295541	L1PA5:LINE:L1:+
chr2	130590598	130591901	SVA_B:Other:Other:+
chr2	131085280	131086183	LTR12D:LTR:ERV1:+
chr2	131744874	131745283	LTR12F:LTR:ERV1:-
chr2	131748837	131750273	LTR12C:LTR:ERV1:+
chr2	132099054	132105238	L1PA4:LINE:L1:-
chr2	132723836	132725085	LTR12D:LTR:ERV1:+
chr2	132820438	132826589	L1PA3:LINE:L1:-
chr2	132988898	132994855	L1PA3:LINE:L1:+
chr2	133210054	133215834	L1PA6:LINE:L1:-
chr2	133286454	133292577	L1PA4:LINE:L1:+
chr2	134140643	134146756	L1PA5:LINE:L1:-
chr2	134222578	134228609	L1PA2:LINE:L1:-
chr2	134304436	134310329	L1PA2:LINE:L1:+
chr2	134668051	134674102	L1PA2:LINE:L1:+
chr2	134800350	134806475	L1PA4:LINE:L1:+
chr2	134820947	134822548	SVA_D:Other:Other:+
chr2	134866040	134867484	LTR12C:LTR:ERV1:-
chr2	134887339	134888888	LTR12C:LTR:ERV1:+
chr2	135408124	135414144	L1PA2:LINE:L1:-
chr2	135504084	135510201	L1PA5:LINE:L1:-
chr2	135561241	135562073	LTR12:LTR:ERV1:-
chr2	135568554	135569219	LTR12_:LTR:ERV1:-
chr2	135583021	135589028	L1PA2:LINE:L1:+
chr2	135725428	135726978	SVA_D:Other:Other:-
chr2	135862772	135864343	SVA_C:Other:Other:+
chr2	135989380	135995518	L1PA4:LINE:L1:+
chr2	136138437	136144570	L1PA6:LINE:L1:+
chr2	136844819	136846157	LTR12C:LTR:ERV1:-
chr2	137353635	137359748	L1PA5:LINE:L1:+
chr2	137515852	137517249	LTR12C:LTR:ERV1:+
chr2	137654766	137655726	LTR12:LTR:ERV1:-
chr2	137698434	137704691	L1PA6:LINE:L1:-
chr2	137828134	137834307	L1PA4:LINE:L1:-
chr2	137859084	137865118	L1PA7:LINE:L1:+
chr2	138067076	138073104	L1PA3:LINE:L1:-
chr2	138087961	138089741	LTR12C:LTR:ERV1:-
chr2	138117812	138123973	L1PA6:LINE:L1:+
chr2	138150730	138156760	L1PA2:LINE:L1:-
chr2	138312130	138318285	L1PA5:LINE:L1:+
chr2	138339913	138346004	L1PA5:LINE:L1:-
chr2	138473193	138474629	LTR12C:LTR:ERV1:+
chr2	138922110	138928873	L1PA16:LINE:L1:+
chr2	139011402	139012199	LTR12:LTR:ERV1:+
chr2	139296317	139302452	L1PA4:LINE:L1:-
chr2	139553224	139559656	L1PA7:LINE:L1:+
chr2	140167728	140168937	LTR12C:LTR:ERV1:+
chr2	140290356	140296544	L1PA3:LINE:L1:-
chr2	140501494	140502216	LTR12:LTR:ERV1:+
chr2	140747395	140748833	LTR12C:LTR:ERV1:-
chr2	140831182	140832494	LTR12C:LTR:ERV1:+
chr2	141976355	141982556	L1PA10:LINE:L1:+
chr2	142199998	142206420	L1PA7:LINE:L1:-
chr2	142572899	142573485	LTR12F:LTR:ERV1:+
chr2	143303446	143304849	LTR12C:LTR:ERV1:+
chr2	143365350	143371381	L1PA2:LINE:L1:-
chr2	143459449	143460879	SVA_D:Other:Other:+
chr2	143485436	143491560	L1PA4:LINE:L1:+
chr2	143563844	143569862	L1PA3:LINE:L1:-
chr2	143763611	143769645	L1PA2:LINE:L1:+
chr2	143846443	143847569	LTR12C:LTR:ERV1:-
chr2	144293947	144300093	L1PA4:LINE:L1:-
chr2	144383944	144384414	LTR12F:LTR:ERV1:-
chr2	144419131	144425156	L1PA2:LINE:L1:+
chr2	144618525	144624556	L1HS:LINE:L1:+
chr2	145655165	145661170	L1PA2:LINE:L1:-
chr2	146539963	146546052	L1PA6:LINE:L1:+
chr2	146637650	146639044	LTR12C:LTR:ERV1:-
chr2	146703754	146709906	L1PA6:LINE:L1:-
chr2	146717295	146718625	LTR12C:LTR:ERV1:-
chr2	147160281	147161811	LTR12C:LTR:ERV1:-
chr2	147163309	147168909	L1PA2:LINE:L1:+
chr2	147399393	147405569	L1PA6:LINE:L1:+
chr2	147545971	147552107	L1PA4:LINE:L1:+
chr2	147638393	147639288	LTR12:LTR:ERV1:-
chr2	147908360	147914536	L1PA4:LINE:L1:+
chr2	147939790	147946097	L1PA7:LINE:L1:+
chr2	148068876	148069499	LTR12_:LTR:ERV1:+
chr2	148076277	148076904	LTR12_:LTR:ERV1:+
chr2	148264296	148265791	LTR12C:LTR:ERV1:+
chr2	148338037	148344470	L1PA7:LINE:L1:-
chr2	148442880	148444366	LTR12C:LTR:ERV1:-
chr2	148484573	148490597	L1PA2:LINE:L1:+
chr2	148524091	148530202	L1PA4:LINE:L1:+
chr2	148584269	148585720	LTR12C:LTR:ERV1:+
chr2	148752488	148753459	LTR12:LTR:ERV1:+
chr2	148906509	148912525	L1PA2:LINE:L1:-
chr2	148946314	148952342	L1HS:LINE:L1:+
chr2	149065216	149071672	L1PA7:LINE:L1:-
chr2	149080413	149086423	L1PA3:LINE:L1:-
chr2	149435152	149436521	LTR12C:LTR:ERV1:-
chr2	150107822	150114616	L1PA7:LINE:L1:-
chr2	150259246	150264798	L1PA3:LINE:L1:-
chr2	150350772	150357184	L1PA8:LINE:L1:-
chr2	150357719	150363920	L1PA4:LINE:L1:-
chr2	150401601	150407731	L1PA4:LINE:L1:-
chr2	150494394	150499999	L1PA4:LINE:L1:-
chr2	150647144	150653267	L1PA5:LINE:L1:-
chr2	150706971	150712980	L1PA2:LINE:L1:+
chr2	150801779	150807806	L1PA2:LINE:L1:+
chr2	150822247	150828379	L1PA4:LINE:L1:+
chr2	150961485	150962279	LTR12:LTR:ERV1:-
chr2	151026907	151028102	LTR12C:LTR:ERV1:-
chr2	151397802	151399635	LTR12C:LTR:ERV1:-
chr2	152152338	152153892	LTR12C:LTR:ERV1:+
chr2	152555382	152561403	L1PA2:LINE:L1:-
chr2	152599881	152606024	L1PA5:LINE:L1:+
chr2	153016222	153018028	SVA_D:Other:Other:+
chr2	153660584	153661868	LTR12C:LTR:ERV1:-
chr2	153752100	153758567	L1PA7:LINE:L1:+
chr2	153852652	153858376	L1PA3:LINE:L1:+
chr2	153864280	153870310	L1HS:LINE:L1:-
chr2	154107987	154113991	L1PA3:LINE:L1:-
chr2	154216507	154222931	L1PA8:LINE:L1:+
chr2	154254435	154260466	L1PA2:LINE:L1:-
chr2	154290345	154296472	L1PA4:LINE:L1:-
chr2	154526071	154533793	L1PA6:LINE:L1:+
chr2	154575960	154581977	L1PA2:LINE:L1:+
chr2	154674410	154680938	L1PA15-16:LINE:L1:+
chr2	155004432	155010594	L1PA3:LINE:L1:-
chr2	155147181	155148372	LTR12D:LTR:ERV1:-
chr2	155695462	155701596	L1PA6:LINE:L1:-
chr2	155738965	155744067	L1PA15:LINE:L1:-
chr2	156202019	156208498	L1PA8:LINE:L1:-
chr2	156323140	156329156	L1PA3:LINE:L1:-
chr2	156822399	156828427	L1PA2:LINE:L1:+
chr2	157111030	157117044	L1PA2:LINE:L1:+
chr2	157149408	157150846	SVA_F:Other:Other:+
chr2	157226774	157232901	L1PA5:LINE:L1:-
chr2	157307177	157309095	SVA_D:Other:Other:-
chr2	157473678	157475136	LTR12C:LTR:ERV1:-
chr2	157818839	157824995	L1PA3:LINE:L1:-
chr2	157953771	157959315	L1PA5:LINE:L1:-
chr2	158130335	158136468	L1PA6:LINE:L1:-
chr2	158225047	158231078	L1PA2:LINE:L1:+
chr2	158254111	158260208	L1PA3:LINE:L1:-
chr2	158371655	158377685	L1PA2:LINE:L1:+
chr2	158422865	158428889	L1HS:LINE:L1:+
chr2	158560688	158567129	L1PA7:LINE:L1:+
chr2	158823621	158824947	LTR12C:LTR:ERV1:-
chr2	159079344	159085484	L1PA4:LINE:L1:+
chr2	159134650	159140800	L1PA3:LINE:L1:+
chr2	159166432	159168041	SVA_B:Other:Other:-
chr2	159207743	159213754	L1PA2:LINE:L1:+
chr2	159215897	159222325	L1PA7:LINE:L1:+
chr2	159290020	159296149	L1PA5:LINE:L1:+
chr2	160212205	160218630	L1PA7:LINE:L1:+
chr2	160480469	160486345	L1PA7:LINE:L1:+
chr2	160678247	160684629	L1PA7:LINE:L1:+
chr2	160971027	160977191	L1HS:LINE:L1:+
chr2	161004990	161011092	L1PA6:LINE:L1:+
chr2	161037201	161043638	L1PA7:LINE:L1:+
chr2	161294769	161296620	SVA_D:Other:Other:-
chr2	161304789	161306349	SVA_B:Other:Other:+
chr2	161613429	161619601	L1PA3:LINE:L1:-
chr2	161623010	161629126	L1PA4:LINE:L1:+
chr2	161632831	161639086	L1PA15:LINE:L1:+
chr2	161653843	161659977	L1PA3:LINE:L1:+
chr2	161707230	161713259	L1PA2:LINE:L1:-
chr2	161866512	161872961	L1PA7:LINE:L1:+
chr2	163091186	163092413	LTR12C:LTR:ERV1:+
chr2	163326182	163327774	SVA_D:Other:Other:+
chr2	163882597	163883992	LTR12C:LTR:ERV1:+
chr2	163923028	163923716	LTR12_:LTR:ERV1:+
chr2	163929238	163929849	LTR12_:LTR:ERV1:+
chr2	164306758	164307475	LTR12:LTR:ERV1:+
chr2	164353895	164360362	L1PA7:LINE:L1:+
chr2	164765852	164767408	LTR12C:LTR:ERV1:+
chr2	164769939	164771378	LTR12C:LTR:ERV1:+
chr2	164820298	164821117	LTR12:LTR:ERV1:-
chr2	165850448	165851831	LTR12C:LTR:ERV1:-
chr2	166342444	166348473	L1PA2:LINE:L1:+
chr2	166812914	166814133	LTR12E:LTR:ERV1:-
chr2	167362090	167368516	L1PA8:LINE:L1:-
chr2	167437733	167443887	L1PA6:LINE:L1:+
chr2	167542345	167548449	L1PA5:LINE:L1:+
chr2	167559235	167565255	L1PA3:LINE:L1:-
chr2	167594673	167595548	LTR12:LTR:ERV1:-
chr2	167600160	167601037	LTR12:LTR:ERV1:-
chr2	167710221	167716358	L1PA3:LINE:L1:+
chr2	167764123	167769965	L1PA5:LINE:L1:-
chr2	167844964	167851000	L1HS:LINE:L1:+
chr2	167938456	167944477	L1PA2:LINE:L1:-
chr2	168298389	168304503	L1PA2:LINE:L1:-
chr2	168519465	168525484	L1PA3:LINE:L1:-
chr2	168660836	168666936	L1PA4:LINE:L1:-
chr2	168691552	168697699	L1PA3:LINE:L1:+
chr2	169512848	169514513	LTR12C:LTR:ERV1:-
chr2	169580515	169581973	LTR12C:LTR:ERV1:-
chr2	170105133	170111166	L1HS:LINE:L1:+
chr2	170164733	170170245	L1PA5:LINE:L1:-
chr2	170255715	170261809	L1PA4:LINE:L1:+
chr2	170309291	170315444	L1PA4:LINE:L1:+
chr2	170431029	170432685	SVA_D:Other:Other:-
chr2	170697858	170699364	LTR12C:LTR:ERV1:+
chr2	170711859	170713335	SVA_B:Other:Other:-
chr2	170982119	170988584	L1PA7:LINE:L1:+
chr2	171005572	171007431	SVA_D:Other:Other:+
chr2	171110405	171117220	L1PA16:LINE:L1:+
chr2	171315414	171316702	LTR12E:LTR:ERV1:-
chr2	171479083	171485181	L1PA5:LINE:L1:-
chr2	171770952	171772415	LTR12C:LTR:ERV1:-
chr2	172206362	172212619	L1PA5:LINE:L1:-
chr2	172630558	172632044	SVA_C:Other:Other:+
chr2	172722362	172724171	SVA_D:Other:Other:-
chr2	172755714	172757482	SVA_D:Other:Other:+
chr2	173051975	173058142	L1PA3:LINE:L1:-
chr2	173129433	173135592	L1PA6:LINE:L1:-
chr2	173179998	173186025	L1HS:LINE:L1:+
chr2	173401887	173403783	SVA_D:Other:Other:+
chr2	173455010	173455646	LTR12_:LTR:ERV1:-
chr2	173553595	173554037	LTR12F:LTR:ERV1:-
chr2	173564488	173565770	SVA_B:Other:Other:-
chr2	174146465	174147877	LTR12C:LTR:ERV1:-
chr2	174165875	174166612	LTR12:LTR:ERV1:-
chr2	174392017	174398045	L1PA3:LINE:L1:-
chr2	174424339	174430786	L1PA7:LINE:L1:+
chr2	174564103	174570138	L1PA2:LINE:L1:-
chr2	175269186	175275210	L1PA2:LINE:L1:-
chr2	175412154	175413839	LTR12C:LTR:ERV1:-
chr2	175573299	175574851	LTR12C:LTR:ERV1:-
chr2	175972254	175973916	SVA_C:Other:Other:+
chr2	176120977	176122286	LTR12C:LTR:ERV1:-
chr2	176346693	176352722	L1HS:LINE:L1:-
chr2	176453274	176459291	L1PA2:LINE:L1:-
chr2	176573548	176580001	L1PA7:LINE:L1:+
chr2	176624323	176630357	L1PA3:LINE:L1:+
chr2	176722080	176722526	LTR12F:LTR:ERV1:+
chr2	176822316	176828438	L1PA3:LINE:L1:+
chr2	177170651	177176760	L1PA6:LINE:L1:-
chr2	177661150	177667155	L1PA3:LINE:L1:+
chr2	177872394	177873830	LTR12C:LTR:ERV1:+
chr2	178700225	178701747	LTR12C:LTR:ERV1:+
chr2	178709270	178710798	SVA_F:Other:Other:-
chr2	178837800	178843817	L1HS:LINE:L1:+
chr2	178914098	178920237	L1PA5:LINE:L1:+
chr2	179216840	179222974	L1PA6:LINE:L1:+
chr2	179847178	179853209	L1PA3:LINE:L1:+
chr2	179925911	179932052	L1PA3:LINE:L1:-
chr2	179952114	179958287	L1PA4:LINE:L1:-
chr2	180060671	180066645	L1PA3:LINE:L1:+
chr2	180076750	180082867	L1PA6:LINE:L1:+
chr2	180250483	180256617	L1PA3:LINE:L1:+
chr2	181391450	181397455	L1PA5:LINE:L1:-
chr2	181450346	181456444	L1PA5:LINE:L1:-
chr2	181555931	181557152	LTR12C:LTR:ERV1:+
chr2	181698388	181704416	L1HS:LINE:L1:-
chr2	181953653	181960106	L1PA7:LINE:L1:+
chr2	182009498	182010751	LTR12D:LTR:ERV1:-
chr2	182275533	182282007	L1PA8A:LINE:L1:+
chr2	182596376	182602556	L1PA6:LINE:L1:+
chr2	182663288	182669434	L1PA6:LINE:L1:-
chr2	182889934	182895966	L1PA2:LINE:L1:-
chr2	183077132	183083161	L1PA3:LINE:L1:+
chr2	183250551	183252161	SVA_C:Other:Other:+
chr2	183473041	183474480	LTR12C:LTR:ERV1:+
chr2	183551281	183557399	L1PA5:LINE:L1:+
chr2	184313042	184319204	L1PA4:LINE:L1:-
chr2	184343252	184344742	SVA_B:Other:Other:+
chr2	184372096	184372632	LTR12_:LTR:ERV1:-
chr2	184377205	184377891	LTR12:LTR:ERV1:-
chr2	184410528	184411939	LTR12C:LTR:ERV1:-
chr2	184450923	184457065	L1PA3:LINE:L1:+
chr2	184480746	184487137	L1PA7:LINE:L1:-
chr2	184655950	184658043	SVA_A:Other:Other:-
chr2	184714250	184720277	L1PA3:LINE:L1:+
chr2	184757088	184758564	LTR12C:LTR:ERV1:+
chr2	184924845	184931317	L1PA8:LINE:L1:-
chr2	185837188	185838152	LTR12:LTR:ERV1:-
chr2	185997166	185998638	LTR12C:LTR:ERV1:+
chr2	186284161	186290189	L1PA2:LINE:L1:-
chr2	186450614	186456635	L1PA2:LINE:L1:-
chr2	186547095	186553207	L1PA6:LINE:L1:-
chr2	186706447	186712483	L1PA2:LINE:L1:-
chr2	186729324	186735343	L1PA2:LINE:L1:+
chr2	186981153	186981899	LTR12:LTR:ERV1:-
chr2	187018052	187019725	SVA_F:Other:Other:-
chr2	187095050	187101189	L1PA4:LINE:L1:+
chr2	187177802	187183677	L1PA4:LINE:L1:+
chr2	187336951	187338935	SVA_D:Other:Other:+
chr2	187657448	187663826	L1PA7:LINE:L1:+
chr2	187760806	187767002	L1PA6:LINE:L1:-
chr2	187826831	187828310	LTR12C:LTR:ERV1:+
chr2	188397006	188403469	L1PA7:LINE:L1:+
chr2	188420652	188422627	SVA_D:Other:Other:+
chr2	188501014	188502909	SVA_A:Other:Other:-
chr2	188816267	188817775	LTR12C:LTR:ERV1:+
chr2	188988288	188994264	L1PA3:LINE:L1:+
chr2	189470337	189471684	LTR12C:LTR:ERV1:-
chr2	189726718	189733128	L1PA8A:LINE:L1:+
chr2	189808223	189809713	LTR12C:LTR:ERV1:-
chr2	190216532	190222910	L1PA7:LINE:L1:-
chr2	190295105	190300891	L1PA5:LINE:L1:+
chr2	190517645	190519221	SVA_B:Other:Other:+
chr2	190869639	190870226	LTR12_:LTR:ERV1:-
chr2	191294930	191296476	SVA_D:Other:Other:-
chr2	191335830	191341935	L1PA4:LINE:L1:+
chr2	191624819	191626254	LTR12C:LTR:ERV1:-
chr2	191636976	191643127	L1PA4:LINE:L1:-
chr2	191957302	191963495	L1PA6:LINE:L1:+
chr2	192261918	192263988	SVA_E:Other:Other:-
chr2	192312749	192313391	LTR12_:LTR:ERV1:+
chr2	192626575	192632602	L1PA2:LINE:L1:+
chr2	192786202	192787725	LTR12C:LTR:ERV1:+
chr2	193133130	193139176	L1PA2:LINE:L1:-
chr2	193372514	193373936	LTR12C:LTR:ERV1:+
chr2	193388896	193395366	L1PA7:LINE:L1:+
chr2	193643227	193643912	LTR12_:LTR:ERV1:-
chr2	193758178	193759676	SVA_B:Other:Other:+
chr2	193789893	193796017	L1PA6:LINE:L1:-
chr2	193823039	193823766	LTR12:LTR:ERV1:-
chr2	194077146	194083174	L1HS:LINE:L1:-
chr2	194248177	194248653	LTR12F:LTR:ERV1:+
chr2	194276677	194277455	LTR12:LTR:ERV1:-
chr2	194366193	194367698	LTR12C:LTR:ERV1:-
chr2	194569637	194575658	L1PA3:LINE:L1:-
chr2	194695592	194701728	L1PA5:LINE:L1:-
chr2	194866369	194868016	LTR12C:LTR:ERV1:-
chr2	194884702	194886213	LTR12C:LTR:ERV1:+
chr2	194954335	194955670	LTR12C:LTR:ERV1:-
chr2	195503853	195509635	L1PA6:LINE:L1:+
chr2	195932245	195938267	L1PA2:LINE:L1:-
chr2	195938962	195944503	L1PA6:LINE:L1:+
chr2	196093159	196099183	L1PA3:LINE:L1:+
chr2	196237947	196243965	L1PA3:LINE:L1:-
chr2	196358149	196358904	LTR12:LTR:ERV1:+
chr2	196380221	196381696	LTR12C:LTR:ERV1:+
chr2	196387726	196393819	L1PA3:LINE:L1:+
chr2	196411223	196412590	LTR12C:LTR:ERV1:-
chr2	196431881	196433915	SVA_F:Other:Other:+
chr2	196608607	196614716	L1PA3:LINE:L1:+
chr2	196953925	196960115	L1PA5:LINE:L1:+
chr2	197386208	197392224	L1PA2:LINE:L1:-
chr2	197569279	197575363	L1PA6:LINE:L1:-
chr2	197770311	197776343	L1HS:LINE:L1:+
chr2	197927210	197933098	L1HS:LINE:L1:+
chr2	198235122	198236490	LTR12C:LTR:ERV1:+
chr2	198315265	198316314	LTR12D:LTR:ERV1:+
chr2	198455266	198456845	LTR12C:LTR:ERV1:-
chr2	198482775	198484476	SVA_D:Other:Other:+
chr2	198552256	198558285	L1PA2:LINE:L1:-
chr2	198560177	198562182	SVA_D:Other:Other:-
chr2	198593686	198599688	L1PA4:LINE:L1:+
chr2	198612677	198619018	L1PA7:LINE:L1:+
chr2	198786730	198788860	SVA_F:Other:Other:-
chr2	198882661	198889133	L1PA7:LINE:L1:+
chr2	199060984	199067139	L1PA5:LINE:L1:+
chr2	199549184	199555615	L1PA7:LINE:L1:+
chr2	199687559	199688285	LTR12:LTR:ERV1:-
chr2	199893208	199899321	L1PA6:LINE:L1:+
chr2	200104331	200110454	L1PA6:LINE:L1:-
chr2	200919128	200926510	L1PA15:LINE:L1:+
chr2	201039324	201040639	LTR12C:LTR:ERV1:+
chr2	201425769	201431934	L1PA5:LINE:L1:-
chr2	201906658	201908168	SVA_B:Other:Other:+
chr2	202030310	202031707	SVA_C:Other:Other:-
chr2	202155267	202161393	L1PA4:LINE:L1:+
chr2	202164668	202170821	L1PA5:LINE:L1:+
chr2	202234449	202240497	L1PA7:LINE:L1:+
chr2	202477323	202483444	L1PA6:LINE:L1:+
chr2	203000758	203001610	LTR12D:LTR:ERV1:-
chr2	203304471	203305553	SVA_B:Other:Other:-
chr2	203367926	203369340	LTR12C:LTR:ERV1:+
chr2	203399004	203400834	SVA_F:Other:Other:-
chr2	203439911	203440584	LTR12_:LTR:ERV1:+
chr2	203579253	203580799	SVA_D:Other:Other:-
chr2	204071104	204072520	SVA_D:Other:Other:+
chr2	204236652	204238195	SVA_D:Other:Other:-
chr2	204506591	204508114	LTR12C:LTR:ERV1:-
chr2	204644345	204644772	LTR12F:LTR:ERV1:-
chr2	204649366	204650863	LTR12C:LTR:ERV1:-
chr2	205855795	205861829	L1PA2:LINE:L1:-
chr2	206738814	206739429	LTR12_:LTR:ERV1:-
chr2	206841781	206843153	LTR12C:LTR:ERV1:+
chr2	207035704	207037297	SVA_D:Other:Other:-
chr2	207758931	207765074	L1PA7:LINE:L1:-
chr2	207772759	207778776	L1PA2:LINE:L1:+
chr2	207865634	207871658	L1PA3:LINE:L1:+
chr2	208208890	208215300	L1PA7:LINE:L1:+
chr2	209091606	209092961	LTR12C:LTR:ERV1:-
chr2	209241607	209243131	SVA_C:Other:Other:-
chr2	209384604	209390710	L1PA7:LINE:L1:-
chr2	209545076	209551236	L1PA5:LINE:L1:-
chr2	209598482	209604641	L1PA16:LINE:L1:-
chr2	209611214	209617369	L1PA3:LINE:L1:-
chr2	209648980	209655148	L1PA4:LINE:L1:+
chr2	209665364	209671515	L1PA3:LINE:L1:+
chr2	209676345	209682372	L1PA2:LINE:L1:+
chr2	209696291	209702457	L1PA4:LINE:L1:+
chr2	209993253	209999306	L1PA2:LINE:L1:+
chr2	210126158	210132251	L1PA5:LINE:L1:+
chr2	210251920	210253226	LTR12C:LTR:ERV1:+
chr2	210352719	210359164	L1PA7:LINE:L1:+
chr2	210610892	210616932	L1PA2:LINE:L1:-
chr2	210723780	210729998	L1PA8A:LINE:L1:-
chr2	210864363	210865847	LTR12C:LTR:ERV1:-
chr2	211215347	211221488	L1PA4:LINE:L1:+
chr2	211370144	211376268	L1PA4:LINE:L1:+
chr2	211599604	211600302	LTR12_:LTR:ERV1:+
chr2	211814831	211816323	SVA_C:Other:Other:+
chr2	212084045	212090069	L1PA2:LINE:L1:+
chr2	212388118	212389663	LTR12C:LTR:ERV1:-
chr2	212727535	212728528	LTR12:LTR:ERV1:+
chr2	212753261	212759296	L1PA2:LINE:L1:+
chr2	212919549	212925684	L1PA5:LINE:L1:+
chr2	213584882	213586336	LTR12C:LTR:ERV1:-
chr2	213621373	213627526	L1PA7:LINE:L1:+
chr2	213649852	213655992	L1PA4:LINE:L1:+
chr2	213740445	213746612	L1PA5:LINE:L1:+
chr2	214218623	214224628	L1PA6:LINE:L1:-
chr2	214566108	214567309	LTR12D:LTR:ERV1:+
chr2	214688378	214695313	L1PA8A:LINE:L1:-
chr2	215137023	215143175	L1PA6:LINE:L1:-
chr2	215548520	215554529	L1PA2:LINE:L1:+
chr2	215699019	215701068	SVA_E:Other:Other:-
chr2	216027480	216029046	SVA_B:Other:Other:-
chr2	216072423	216073812	LTR12C:LTR:ERV1:+
chr2	216084966	216091054	L1PA4:LINE:L1:+
chr2	216109689	216111019	LTR12C:LTR:ERV1:-
chr2	216117694	216123836	L1PA4:LINE:L1:+
chr2	216683744	216690200	L1PA7:LINE:L1:+
chr2	216852825	216859291	L1PA7:LINE:L1:+
chr2	217319438	217325565	L1PA5:LINE:L1:+
chr2	217749798	217751140	LTR12C:LTR:ERV1:+
chr2	218210252	218216987	L1PA13:LINE:L1:-
chr2	218651018	218652535	LTR12C:LTR:ERV1:-
chr2	218967328	218973406	L1PA5:LINE:L1:-
chr2	218986220	218986884	LTR12_:LTR:ERV1:-
chr2	219795486	219797322	SVA_D:Other:Other:+
chr2	220065169	220066713	LTR12C:LTR:ERV1:-
chr2	220177359	220178727	LTR12C:LTR:ERV1:+
chr2	220615258	220616743	SVA_B:Other:Other:-
chr2	220678230	220684380	L1PA4:LINE:L1:-
chr2	220796539	220802559	L1PA2:LINE:L1:+
chr2	222756211	222757769	SVA_D:Other:Other:+
chr2	222849281	222855305	L1PA2:LINE:L1:+
chr2	223014320	223020351	L1PA2:LINE:L1:-
chr2	223449096	223455245	L1PA5:LINE:L1:+
chr2	224152314	224158804	L1PA7:LINE:L1:-
chr2	224195228	224201371	L1PA6:LINE:L1:+
chr2	225467432	225468983	LTR12C:LTR:ERV1:-
chr2	225617976	225618638	LTR12_:LTR:ERV1:-
chr2	226093265	226094731	LTR12C:LTR:ERV1:-
chr2	226608661	226610095	LTR12C:LTR:ERV1:+
chr2	226688991	226695473	L1PA8:LINE:L1:+
chr2	226971992	226978133	L1PA4:LINE:L1:+
chr2	227450783	227457363	L1PA11:LINE:L1:-
chr2	227512540	227514039	LTR12C:LTR:ERV1:+
chr2	228185168	228187002	LTR12C:LTR:ERV1:+
chr2	228895610	228901759	L1PA4:LINE:L1:+
chr2	229063854	229070015	L1PA4:LINE:L1:-
chr2	229284703	229290740	L1PA2:LINE:L1:-
chr2	229432973	229438997	L1PA2:LINE:L1:+
chr2	229620409	229626433	L1PA2:LINE:L1:+
chr2	230606853	230608857	SVA_D:Other:Other:+
chr2	230715252	230716658	LTR12C:LTR:ERV1:+
chr2	230976787	230982968	L1PA6:LINE:L1:-
chr2	231390158	231396267	L1PA6:LINE:L1:+
chr2	231828094	231829522	LTR12C:LTR:ERV1:-
chr2	232896211	232902701	L1PA7:LINE:L1:-
chr2	233013906	233019939	L1HS:LINE:L1:-
chr2	233219948	233225955	L1PA3:LINE:L1:+
chr2	233769785	233771888	SVA_D:Other:Other:+
chr2	234632172	234633880	SVA_F:Other:Other:-
chr2	234931870	234933493	LTR12C:LTR:ERV1:-
chr2	235156149	235157423	LTR12C:LTR:ERV1:+
chr2	235470777	235472251	SVA_E:Other:Other:+
chr2	235684130	235690287	L1PA5:LINE:L1:+
chr2	237292309	237298332	L1PA2:LINE:L1:-
chr2	238752114	238758208	L1PA5:LINE:L1:-
chr2	238965827	238967064	LTR12C:LTR:ERV1:-
chr2	239630863	239631897	LTR12D:LTR:ERV1:-
chr2	240370634	240372123	SVA_D:Other:Other:-
chr2	241477522	241478987	LTR12C:LTR:ERV1:+
chr2	241483911	241489939	L1PA3:LINE:L1:+
chr2	242777891	242778486	LTR12F:LTR:ERV1:-
chr3	53474785	53480929	L1PA5:LINE:L1:-
chr3	84934128	84940294	L1PA6:LINE:L1:+
chr3	155186851	155192877	L1PA2:LINE:L1:+
chr3	3927289	3933754	L1PA7:LINE:L1:-
chr3	5632492	5638638	L1PA5:LINE:L1:-
chr3	9301539	9308068	L1PA7:LINE:L1:+
chr3	15203535	15205694	SVA_D:Other:Other:-
chr3	24245012	24251321	L1PA5:LINE:L1:+
chr3	26078019	26084260	L1PA4:LINE:L1:-
chr3	34469228	34475377	L1PA4:LINE:L1:-
chr3	35518881	35524752	L1PA5:LINE:L1:-
chr3	48102670	48104004	SVA_C:Other:Other:+
chr3	51641122	51642906	SVA_B:Other:Other:-
chr3	56752779	56754246	LTR12C:LTR:ERV1:+
chr3	60946097	60952238	L1PA5:LINE:L1:-
chr3	87424296	87425618	LTR12C:LTR:ERV1:+
chr3	90045124	90051260	L1PA4:LINE:L1:+
chr3	95809724	95816219	L1PA7:LINE:L1:+
chr3	108918719	108924750	L1HS:LINE:L1:+
chr3	111275050	111281081	L1PA2:LINE:L1:-
chr3	111930068	111936206	L1PA5:LINE:L1:+
chr3	116257063	116263309	L1PA15:LINE:L1:+
chr3	120451396	120457470	L1PA5:LINE:L1:-
chr3	121105250	121111385	L1PA6:LINE:L1:-
chr3	121760758	121766785	L1PA2:LINE:L1:-
chr3	140374433	140380938	L1PA11:LINE:L1:+
chr3	152698490	152704193	L1PA5:LINE:L1:+
chr3	154662949	154669089	L1PA6:LINE:L1:+
chr3	170650706	170656861	L1PA5:LINE:L1:-
chr3	174322964	174329115	L1PA3:LINE:L1:+
chr3	409344	415736	L1PA6:LINE:L1:-
chr3	576869	578003	LTR12D:LTR:ERV1:-
chr3	851059	857098	L1PA3:LINE:L1:+
chr3	857884	864301	L1PA7:LINE:L1:+
chr3	1099571	1105329	L1PA7:LINE:L1:-
chr3	1429244	1435255	L1PA2:LINE:L1:+
chr3	1497007	1497466	LTR12_:LTR:ERV1:+
chr3	1519175	1525309	L1PA5:LINE:L1:+
chr3	1723361	1729478	L1PA4:LINE:L1:+
chr3	1760452	1760937	LTR12F:LTR:ERV1:-
chr3	1798078	1804953	L1PA16:LINE:L1:+
chr3	1955192	1961329	L1PA6:LINE:L1:-
chr3	2125133	2126768	LTR12C:LTR:ERV1:+
chr3	2393903	2395392	LTR12C:LTR:ERV1:+
chr3	2465748	2471825	L1PA5:LINE:L1:-
chr3	2526415	2528043	LTR12C:LTR:ERV1:+
chr3	2708278	2714419	L1PA5:LINE:L1:-
chr3	2957882	2959039	SVA_B:Other:Other:-
chr3	3761070	3767066	L1PA2:LINE:L1:+
chr3	4004760	4010794	L1HS:LINE:L1:+
chr3	4208762	4209372	LTR12F:LTR:ERV1:-
chr3	4216249	4222368	L1PA6:LINE:L1:+
chr3	4253485	4259194	L1PA7:LINE:L1:+
chr3	4294932	4300972	L1PA2:LINE:L1:+
chr3	4958219	4964252	L1HS:LINE:L1:+
chr3	5007442	5013598	L1PA4:LINE:L1:+
chr3	5154918	5156388	SVA_D:Other:Other:-
chr3	5284057	5285221	SVA_B:Other:Other:-
chr3	5324907	5326448	SVA_D:Other:Other:-
chr3	5700341	5701113	LTR12D:LTR:ERV1:-
chr3	6168482	6169217	LTR12:LTR:ERV1:-
chr3	6308606	6314721	L1PA3:LINE:L1:-
chr3	6324639	6331437	L1PA16:LINE:L1:+
chr3	6382506	6388622	L1PA3:LINE:L1:+
chr3	6526598	6532616	L1PA2:LINE:L1:-
chr3	6805823	6811787	L1PA3:LINE:L1:-
chr3	6986741	6992877	L1PA4:LINE:L1:-
chr3	7279113	7279739	LTR12:LTR:ERV1:-
chr3	7610110	7611659	LTR12C:LTR:ERV1:+
chr3	8413520	8419732	L1PA7:LINE:L1:+
chr3	8653210	8659221	L1PA3:LINE:L1:+
chr3	8757762	8763783	L1PA3:LINE:L1:+
chr3	8963636	8969751	L1PA4:LINE:L1:+
chr3	9611136	9612416	SVA_C:Other:Other:+
chr3	9981015	9982408	SVA_D:Other:Other:-
chr3	10111143	10112829	SVA_D:Other:Other:+
chr3	10177283	10178614	LTR12C:LTR:ERV1:-
chr3	10699194	10704915	L1PA5:LINE:L1:+
chr3	11102894	11104266	LTR12C:LTR:ERV1:+
chr3	11111809	11113464	LTR12C:LTR:ERV1:-
chr3	11116381	11117332	LTR12:LTR:ERV1:-
chr3	11135539	11136996	LTR12C:LTR:ERV1:+
chr3	11389720	11390760	LTR12:LTR:ERV1:-
chr3	11552348	11553634	LTR12C:LTR:ERV1:-
chr3	11553986	11555282	LTR12C:LTR:ERV1:-
chr3	11647968	11648476	LTR12F:LTR:ERV1:+
chr3	11903461	11909604	L1PA6:LINE:L1:-
chr3	11959639	11960539	LTR12:LTR:ERV1:+
chr3	12809488	12810923	LTR12C:LTR:ERV1:-
chr3	12890535	12892062	SVA_D:Other:Other:-
chr3	12924206	12925478	LTR12C:LTR:ERV1:+
chr3	13221072	13222474	LTR12C:LTR:ERV1:+
chr3	13487715	13489261	LTR12C:LTR:ERV1:-
chr3	13771901	13778342	L1PA7:LINE:L1:-
chr3	14031214	14037360	L1PA4:LINE:L1:-
chr3	14069820	14071556	LTR12C:LTR:ERV1:-
chr3	14078524	14079956	LTR12C:LTR:ERV1:+
chr3	14111597	14117746	L1PA4:LINE:L1:+
chr3	14230309	14235905	L1PA7:LINE:L1:-
chr3	14334538	14336214	LTR12C:LTR:ERV1:+
chr3	15102690	15104572	SVA_D:Other:Other:+
chr3	15228172	15234206	L1PA3:LINE:L1:+
chr3	15433014	15439121	L1PA4:LINE:L1:-
chr3	15783307	15784862	SVA_D:Other:Other:+
chr3	15948753	15954885	L1PA4:LINE:L1:-
chr3	15982560	15983415	LTR12:LTR:ERV1:-
chr3	16118646	16119442	LTR12:LTR:ERV1:+
chr3	16200378	16206497	L1PA6:LINE:L1:-
chr3	16718119	16724257	L1PA4:LINE:L1:+
chr3	16815041	16816592	LTR12C:LTR:ERV1:+
chr3	17020832	17022662	SVA_D:Other:Other:-
chr3	17654383	17660531	L1PA6:LINE:L1:-
chr3	17734605	17741044	L1PA3:LINE:L1:+
chr3	17815753	17816433	LTR12_:LTR:ERV1:+
chr3	17823143	17823898	LTR12:LTR:ERV1:+
chr3	17858066	17859742	LTR12C:LTR:ERV1:-
chr3	18041188	18047310	L1PA4:LINE:L1:-
chr3	18971974	18978012	L1PA2:LINE:L1:-
chr3	19017441	19023578	L1PA3:LINE:L1:+
chr3	19138860	19144839	L1PA2:LINE:L1:-
chr3	19159162	19165565	L1PA8:LINE:L1:+
chr3	19275222	19276297	LTR12C:LTR:ERV1:-
chr3	19391821	19397378	L1PA5:LINE:L1:+
chr3	19412102	19418117	L1PA2:LINE:L1:-
chr3	19609213	19609976	LTR12:LTR:ERV1:-
chr3	19718174	19724418	L1PA7:LINE:L1:-
chr3	19743891	19745264	LTR12C:LTR:ERV1:+
chr3	19896540	19902567	L1PA2:LINE:L1:+
chr3	20310920	20311723	LTR12_:LTR:ERV1:+
chr3	20317223	20317935	LTR12_:LTR:ERV1:+
chr3	20468634	20475062	L1PA7:LINE:L1:-
chr3	20588777	20590321	SVA_B:Other:Other:-
chr3	20820345	20827220	L1PA14:LINE:L1:+
chr3	20856924	20863023	L1PA5:LINE:L1:-
chr3	20907651	20909313	SVA_D:Other:Other:-
chr3	21049278	21049849	LTR12F:LTR:ERV1:-
chr3	21142005	21148319	L1PA15:LINE:L1:-
chr3	21291216	21297247	L1PA2:LINE:L1:-
chr3	21312391	21313666	LTR12C:LTR:ERV1:-
[truncated: 10,911 more rows]
