# Supplementary material for: Potential role of KRAB-ZFP binding and transcriptional states on DNA methylation of retroelements in human male germ cells
Source: eLife. 2022 Mar 22;11:e76822. doi: 10.7554/eLife.76822 (PMC8967385; doi:10.7554/eLife.76822)
Supplement: Supplementary file 2. [file elife-76822-supp2.xlsx]

## Sheet: Table S2
Supplementary File 2	Statistical analysis of DNA methylation levels of repeat elements in human PGCs (Related to Fig. 1C-E)
Tukey test
Related to Fig. 1C	adj P-value		Related to Fig. 1D	adj P-value		Related to Fig. 1E	adj P-value
SVA_B-SVA_A	0		L1PA2-L1HS	0.692272		LTR12_-LTR12	0.970982
SVA_C-SVA_A	0		L1PA3-L1HS	0		LTR12C-LTR12	0.423199
SVA_D-SVA_A	0		L1PA4-L1HS	0		LTR12D-LTR12	0.577028
SVA_E-SVA_A	0		L1PA5-L1HS	0		LTR12E-LTR12	0.165037
SVA_F-SVA_A	0		L1PA6-L1HS	0.0927246		LTR12F-LTR12	1
SVA_C-SVA_B	1		L1PA7-L1HS	1		LTR12C-LTR12_	0.997991
SVA_D-SVA_B	5.1e-06		L1PA8-L1HS	1		LTR12D-LTR12_	0.998328
SVA_E-SVA_B	0.950832		L1PA3-L1PA2	0		LTR12E-LTR12_	0.808065
SVA_F-SVA_B	0.189279		L1PA4-L1PA2	0		LTR12F-LTR12_	0.999579
SVA_D-SVA_C	0.0003673		L1PA5-L1PA2	0		LTR12D-LTR12C	1
SVA_E-SVA_C	0.959081		L1PA6-L1PA2	0.120764		LTR12E-LTR12C	0.687283
SVA_F-SVA_C	0.269293		L1PA7-L1PA2	0.0042271		LTR12F-LTR12C	0.99603
SVA_E-SVA_D	0.994133		L1PA8-L1PA2	0.394387		LTR12E-LTR12D	0.813905
SVA_F-SVA_D	0.995673		L1PA4-L1PA3	0.0006684		LTR12F-LTR12D	0.995966
SVA_F-SVA_E	0.99979		L1PA5-L1PA3	0.985178		LTR12F-LTR12E	0.945884
			L1PA6-L1PA3	0
			L1PA7-L1PA3	0
			L1PA8-L1PA3	0
			L1PA5-L1PA4	0.045345
			L1PA6-L1PA4	0
			L1PA7-L1PA4	0
			L1PA8-L1PA4	0
			L1PA6-L1PA5	0
			L1PA7-L1PA5	0
			L1PA8-L1PA5	0
			L1PA7-L1PA6	0
			L1PA8-L1PA6	0.0106138
			L1PA8-L1PA7	1
