# Supplementary figures and images for: Potential role of KRAB-ZFP binding and transcriptional states on DNA methylation of retroelements in human male germ cells
Source: eLife journal article supplement (doi:10.7554/elife.76822), 2022-03-22

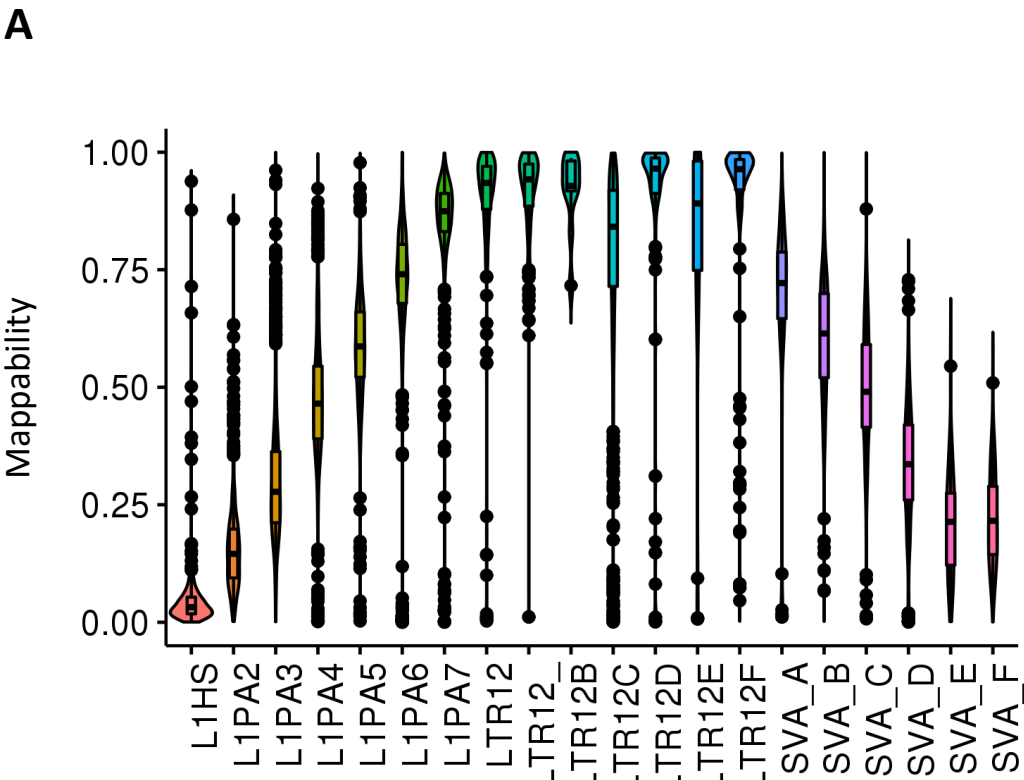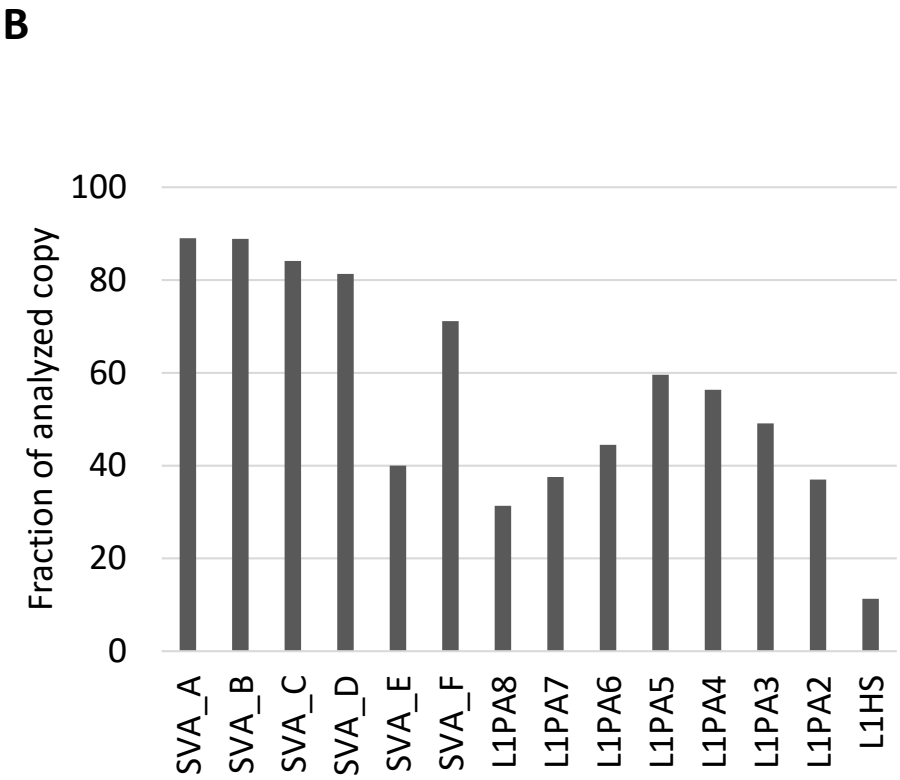

Supplement: supp [file elife_poa_e76822_Figure_1_figure_supplement_1.pdf › elife_poa_e76822_Figure_1_figure_supplement_1.pdf]

A

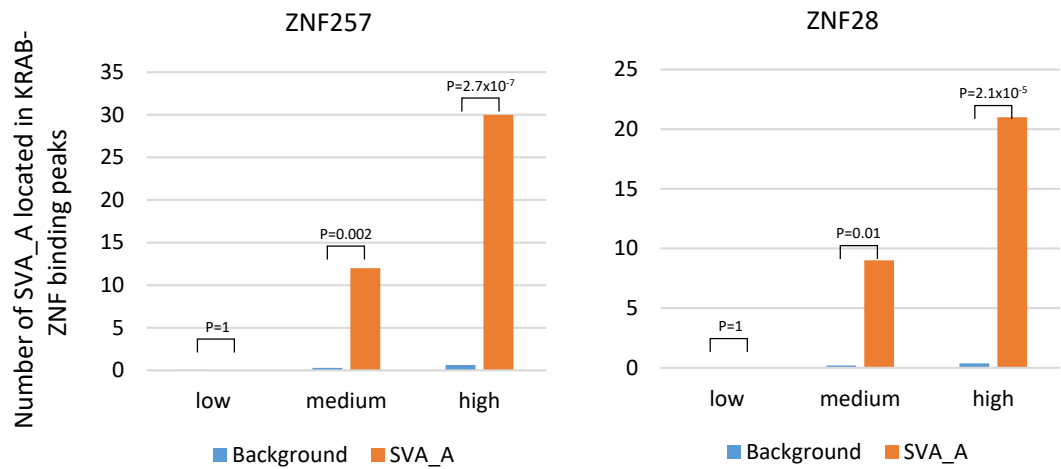

B

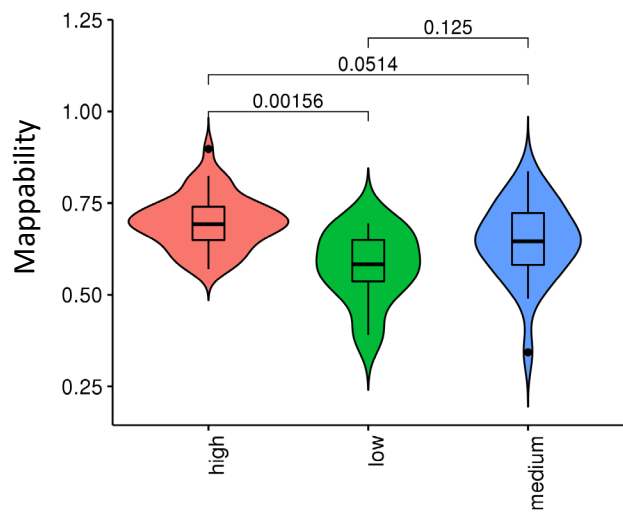

C

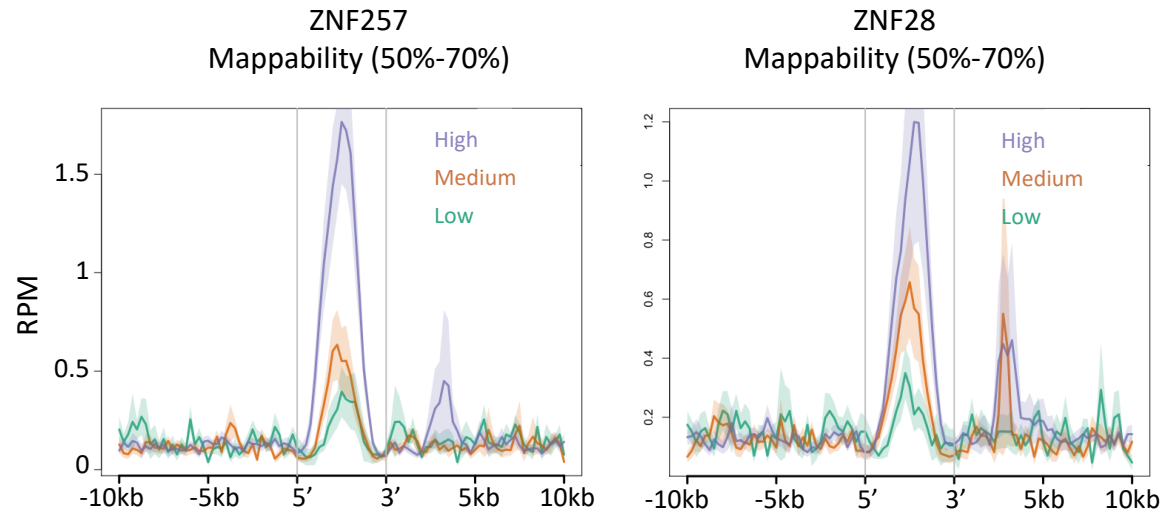

D

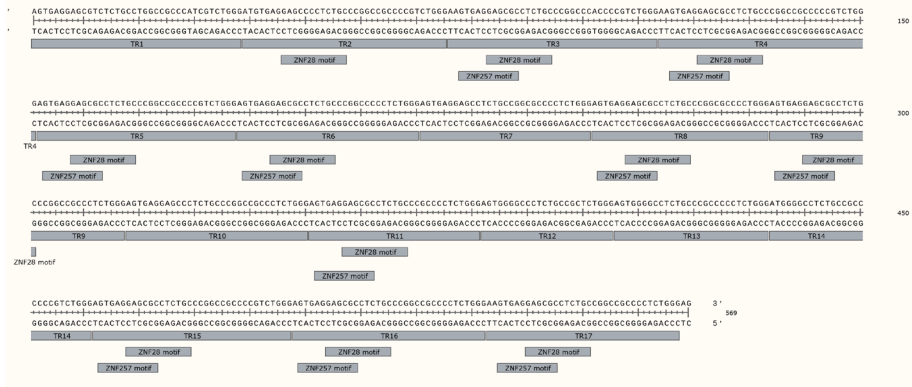

E

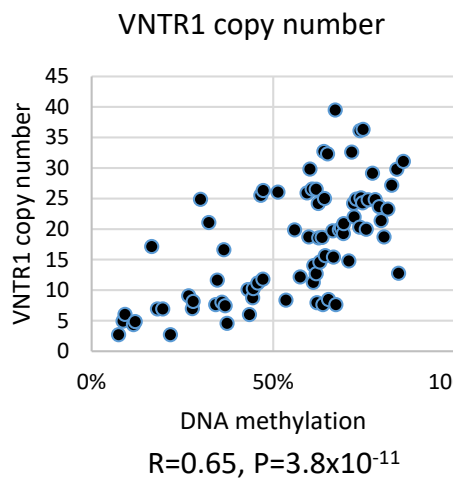

F

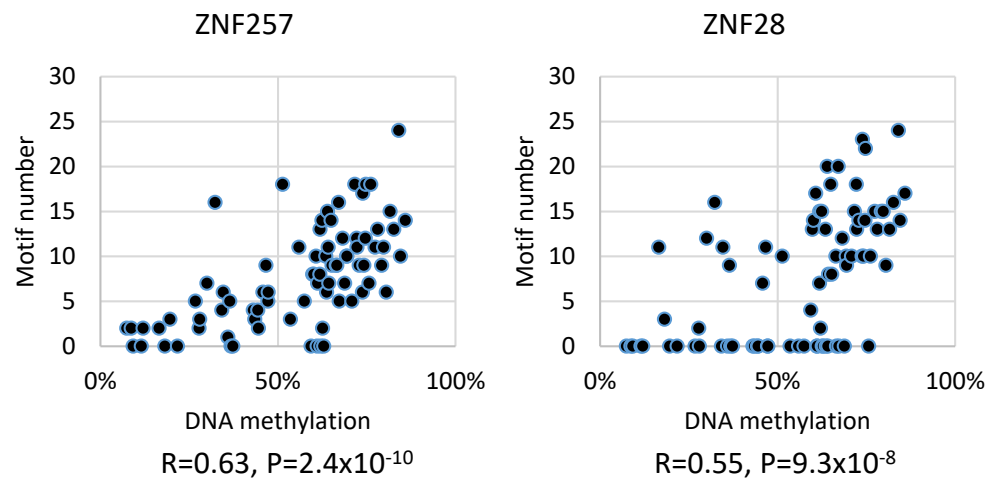

G

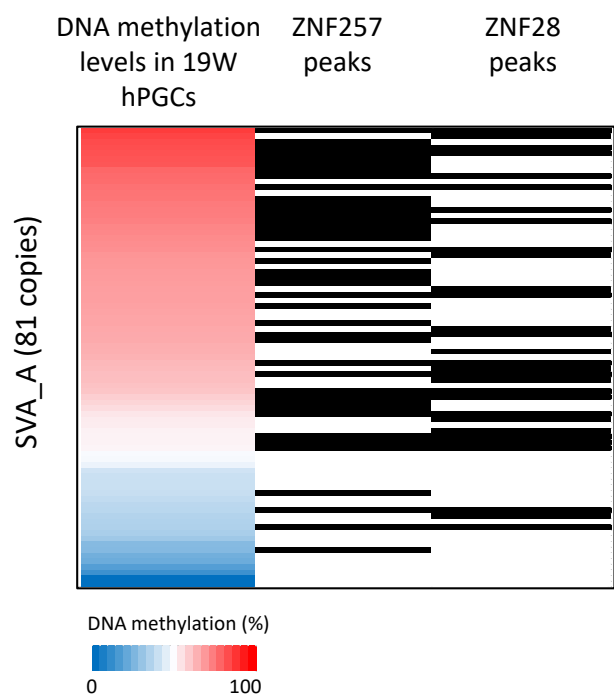

H

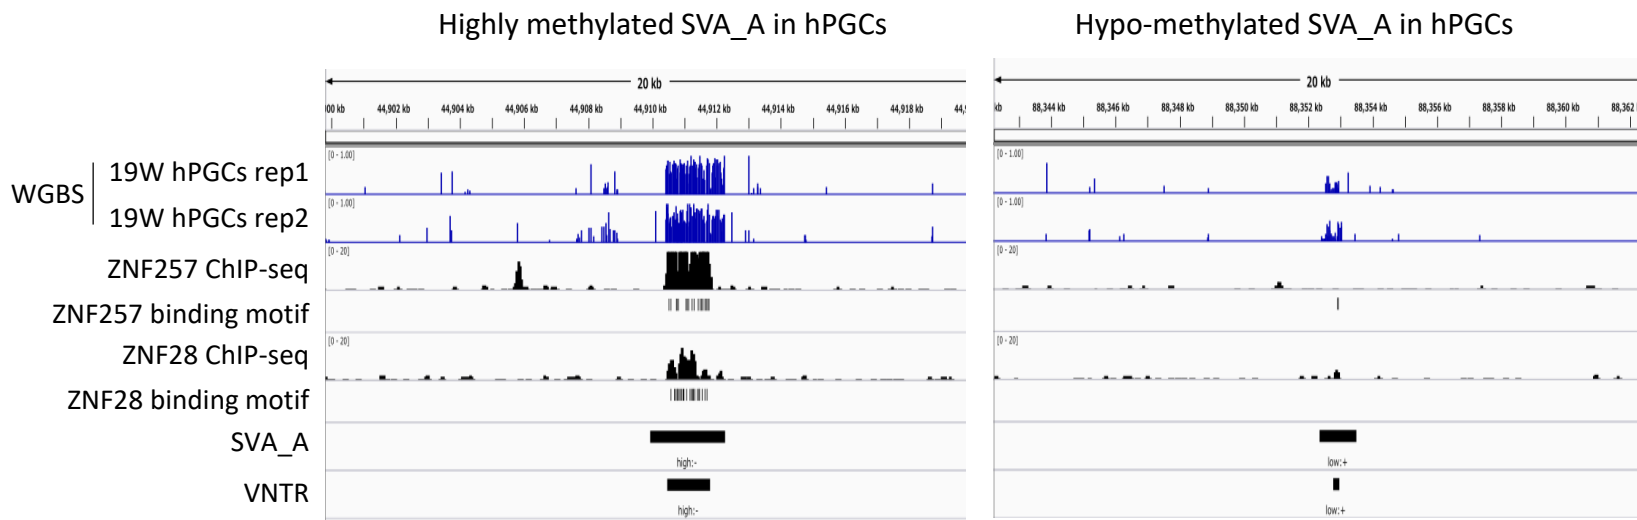

Supplement: supp [file elife_poa_e76822_Figure_2_figure_supplement_1.pdf › elife_poa_e76822_Figure_2_figure_supplement_1.pdf]

A

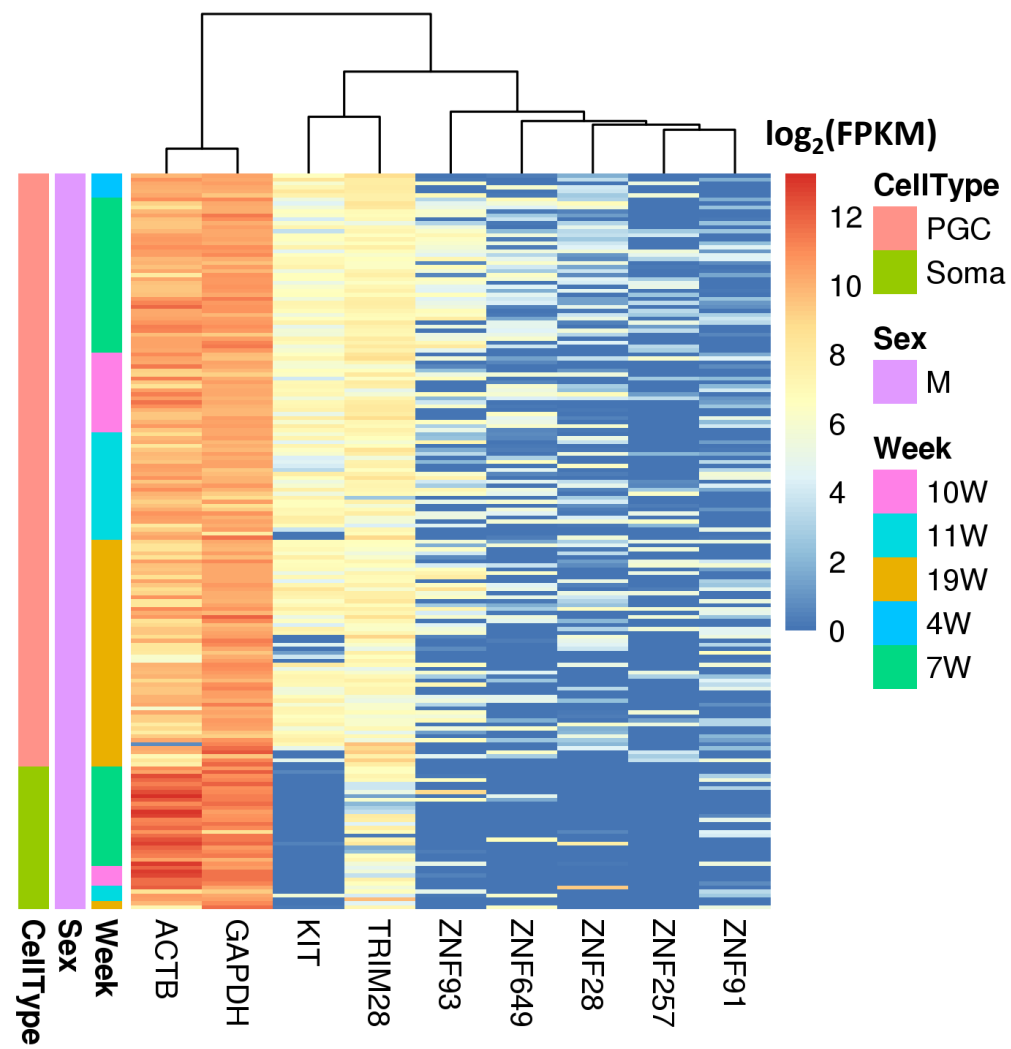

B

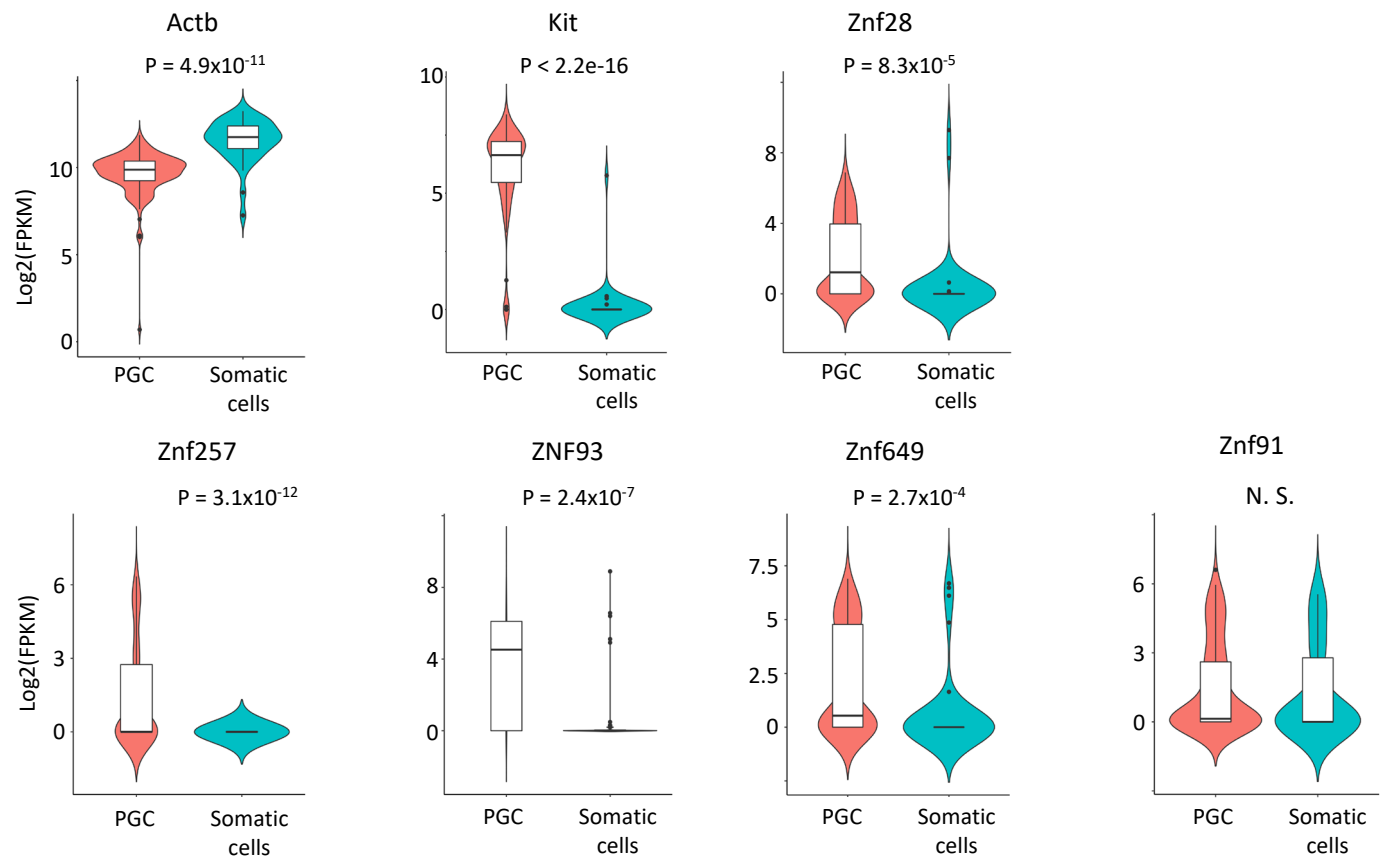

Supplement: supp [file elife_poa_e76822_Figure_2_figure_supplement_2.pdf › elife_poa_e76822_Figure_2_figure_supplement_2.pdf]

A

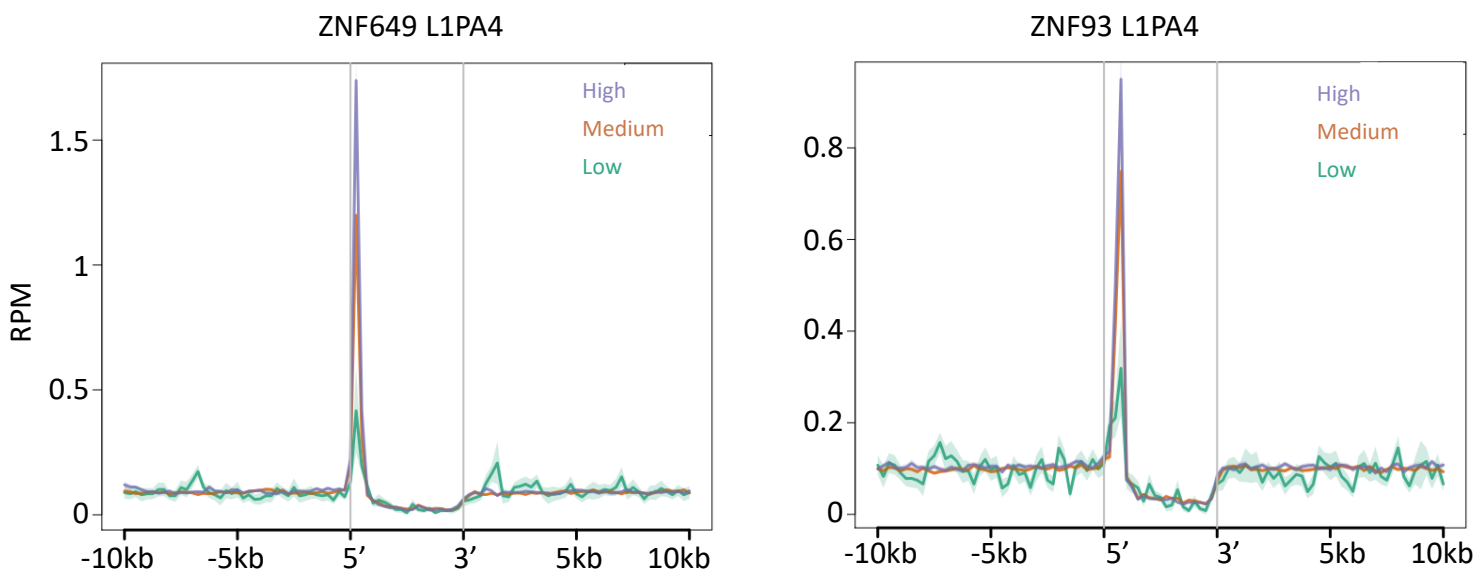

B

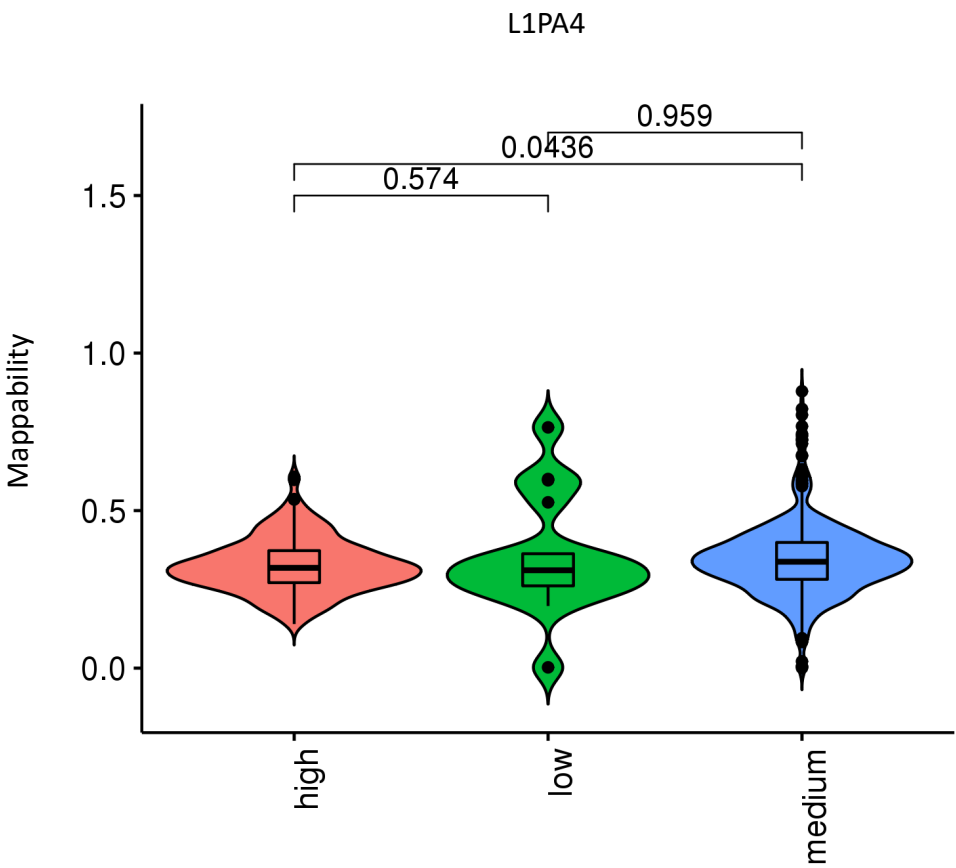

Supplement: supp [file elife_poa_e76822_Figure_3_figure_supplement_1.pdf › elife_poa_e76822_Figure_3_figure_supplement_1.pdf]

Fukuda et al., Figure 3-figure supplement 2

A

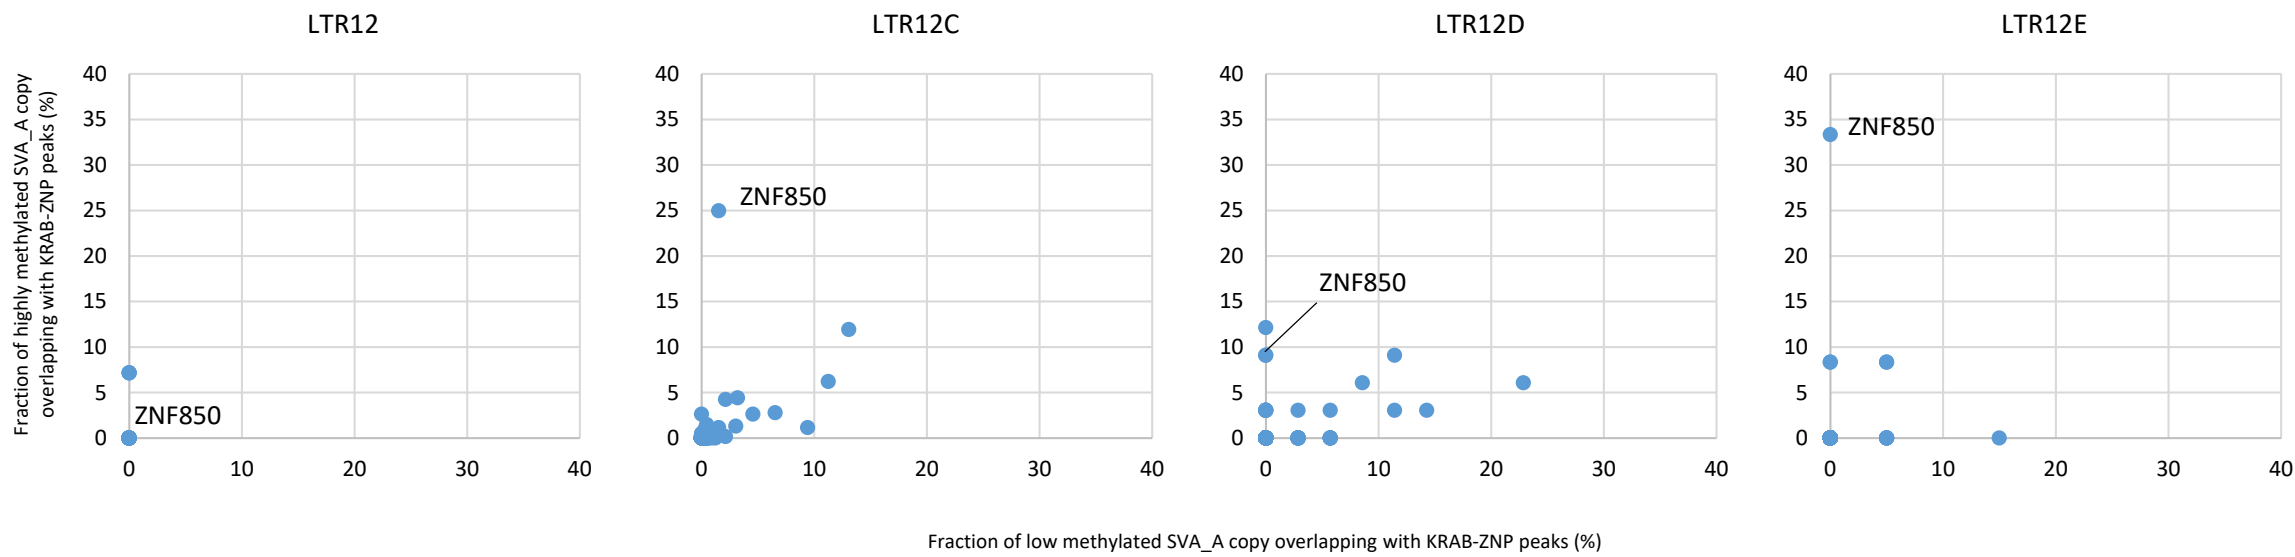

B

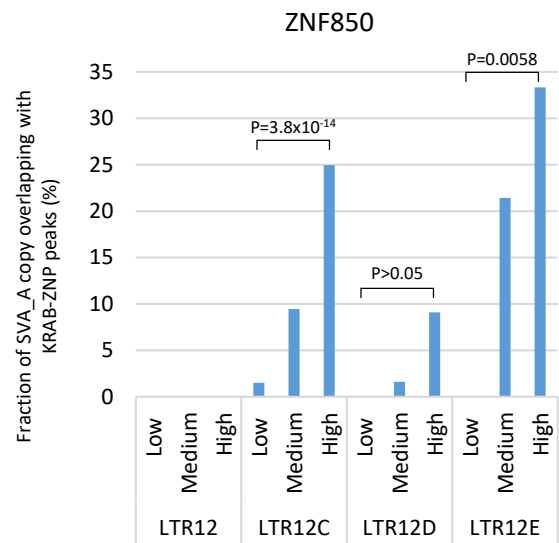

C

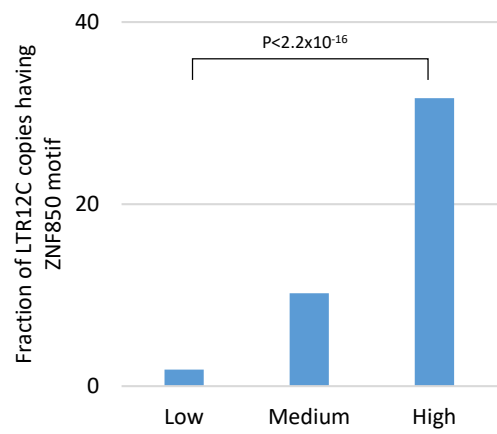

D

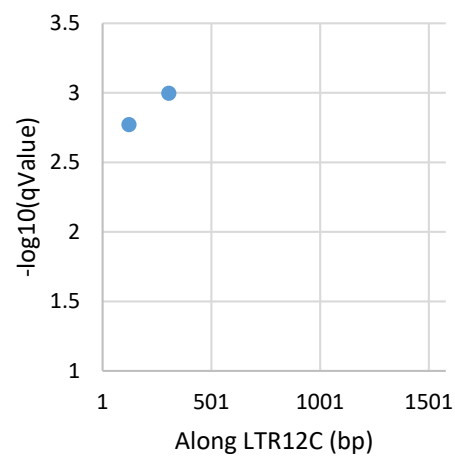

E

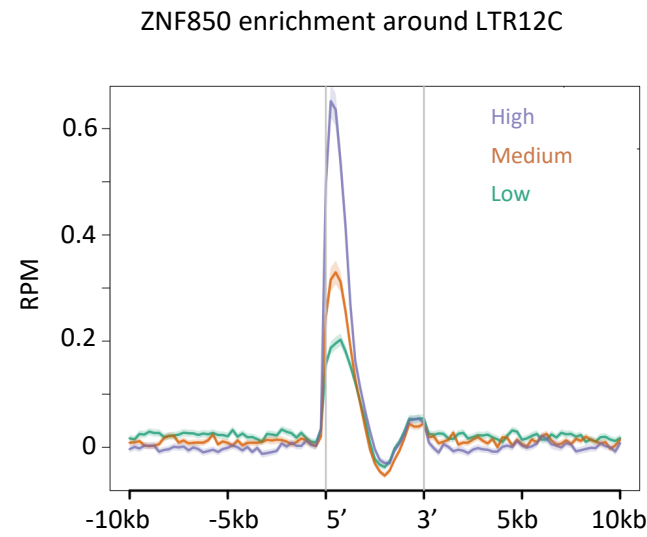

F

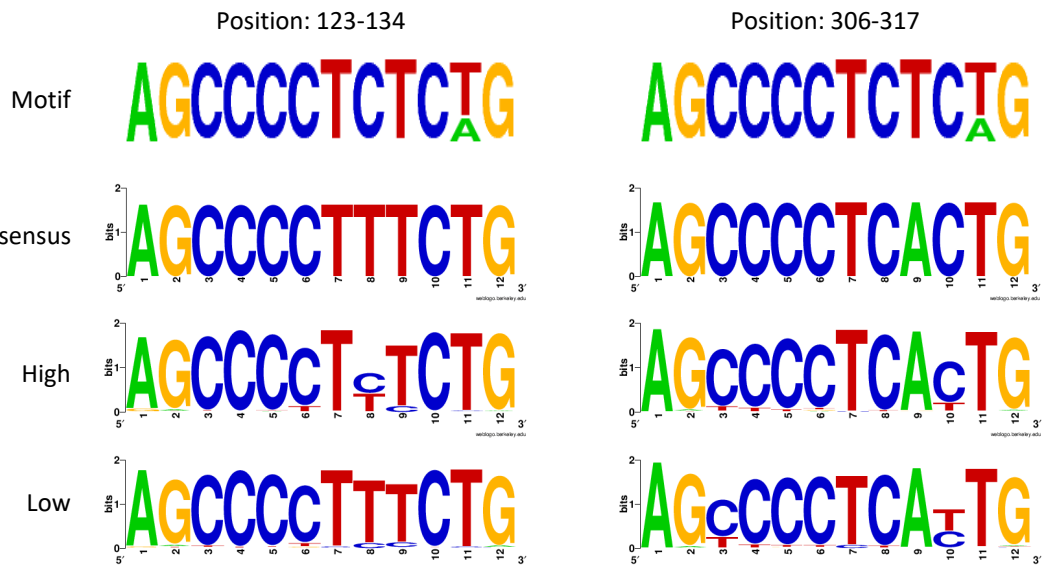

G

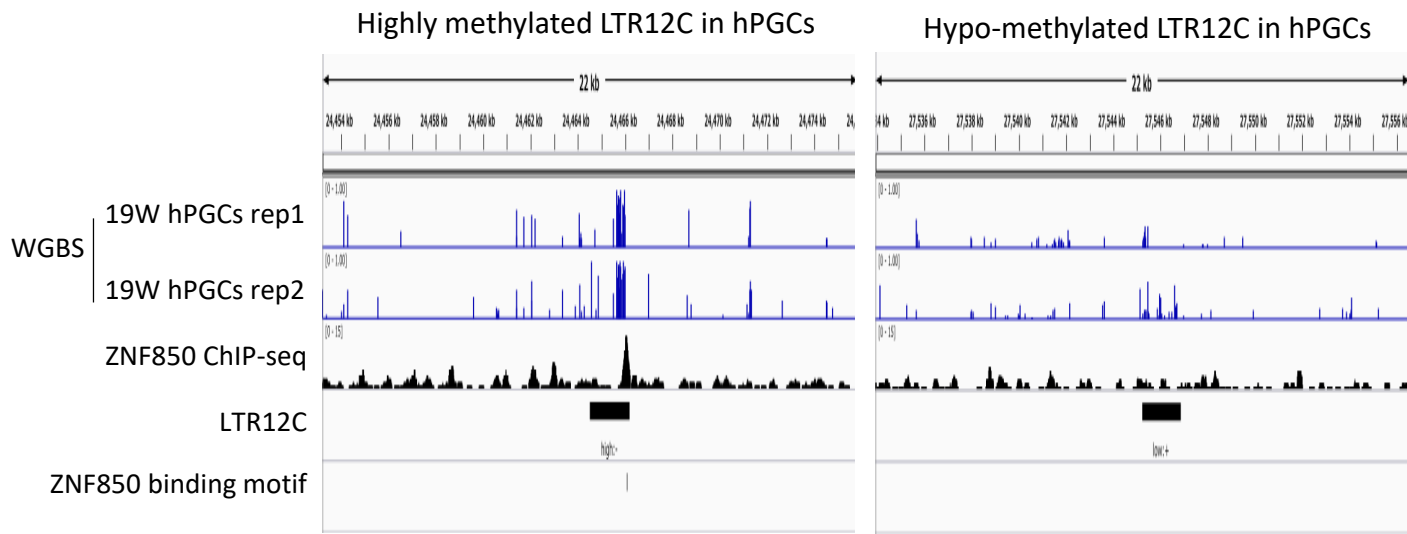

Supplement: supp [file elife_poa_e76822_Figure_3_figure_supplement_2.pdf › elife_poa_e76822_Figure_3_figure_supplement_2.pdf]

# Fukuda et al., Figure 6-figure supplement 1

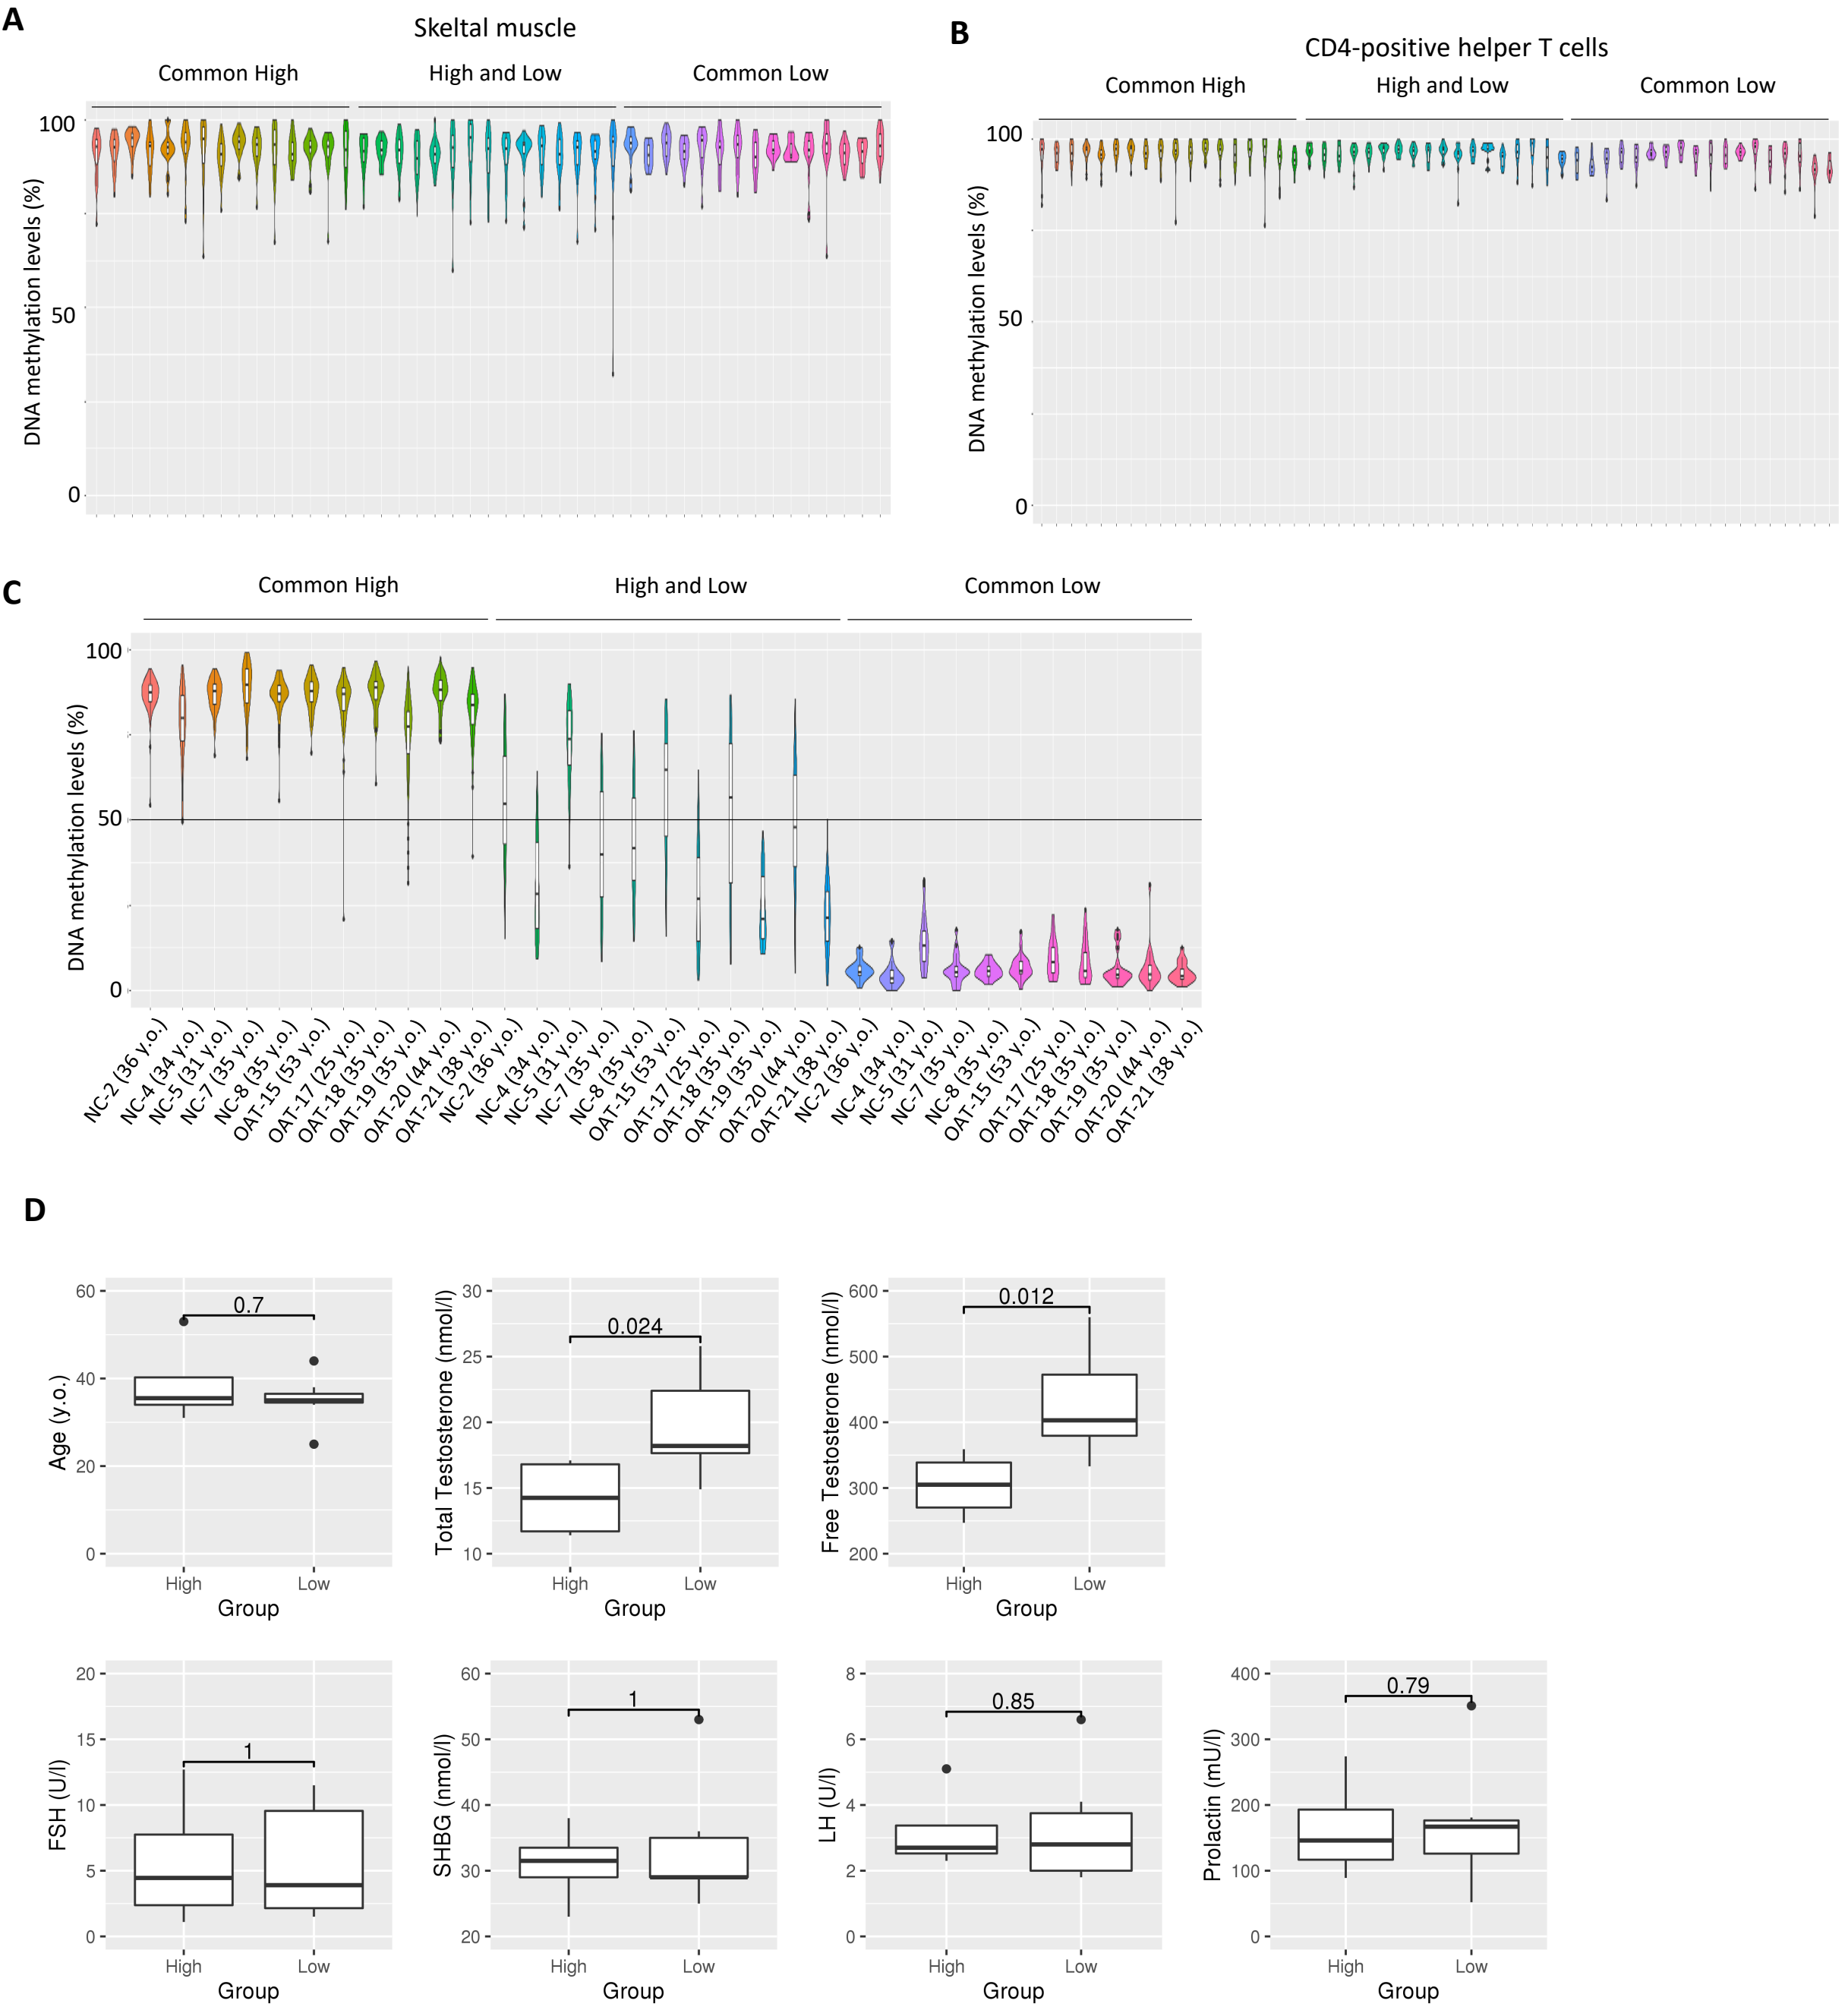

Supplement: supp [file elife_poa_e76822_Figure_6_figure_supplement_1.pdf › elife_poa_e76822_Figure_6_figure_supplement_1.pdf]
